# Supplementary material for: An open-source computational and data resource to analyze digital maps of immunopeptidomes
Source: eLife journal article supplement (doi:10.7554/elife.07661), 2015-07-08
Supplement: supp [file elife-07661-supp-v1.zip]

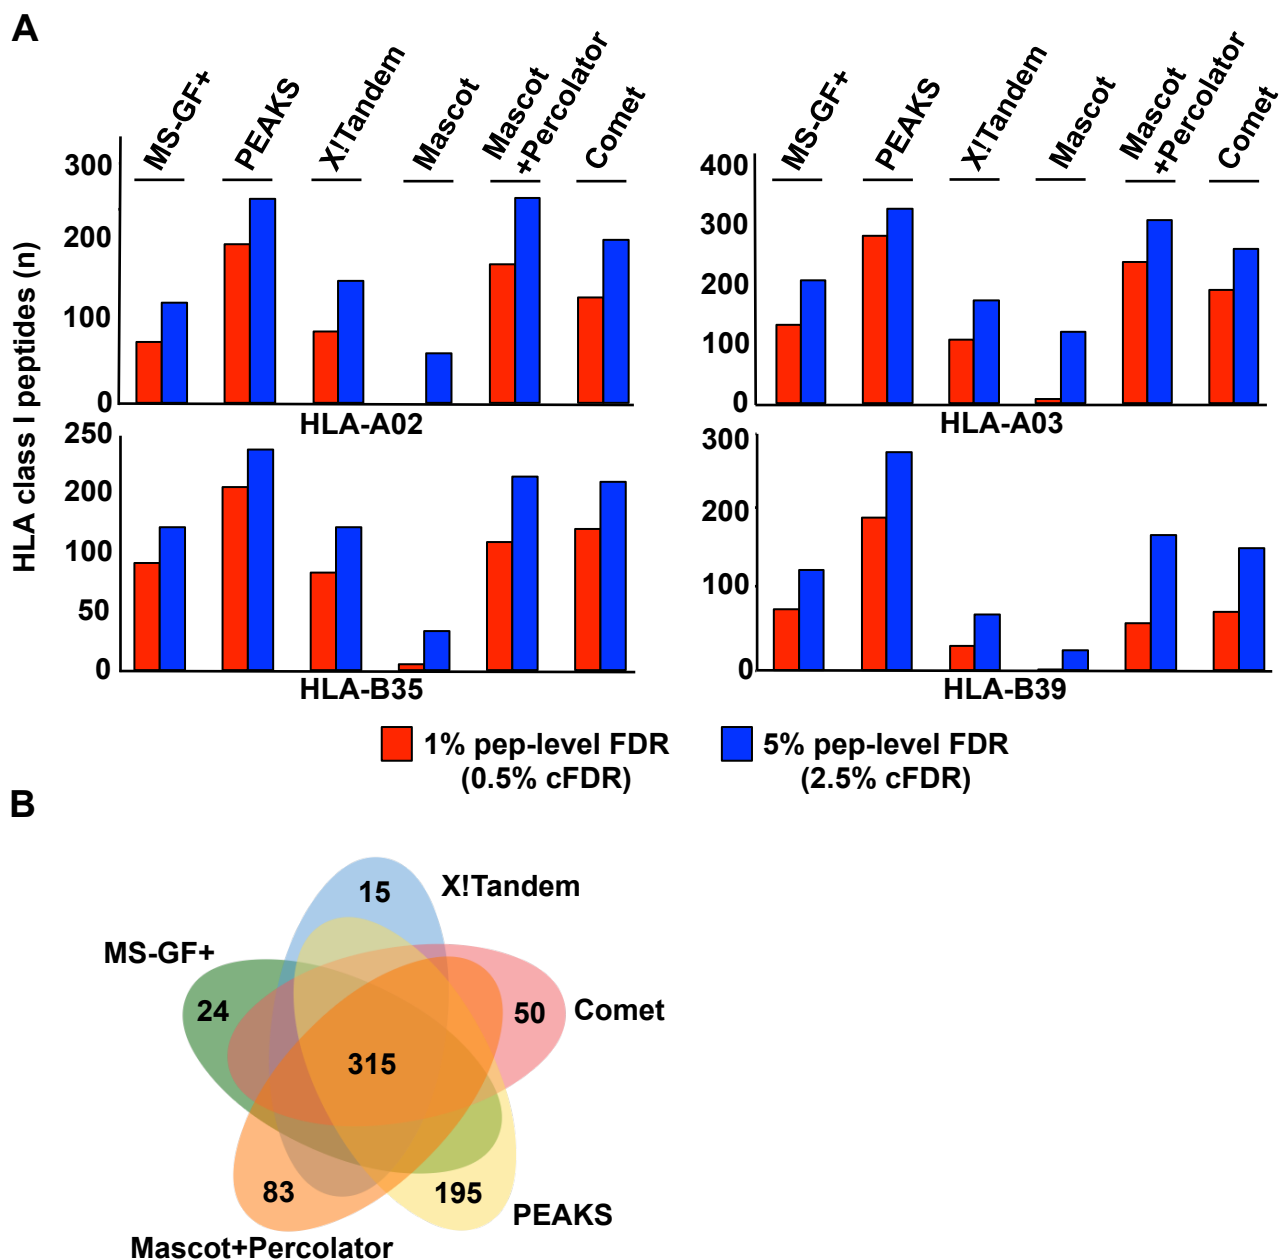

**Figure 1—figure supplement 3. Combining both open-source and commercial database search engines in immunopeptidomics.** Analysis of PBMC#2 is shown here as an example. **(A)** Comparison of search results obtained from multiple search engines and for different class I HLA alleles at 1% and 5% peptide-level FDR. Performance of two commercial search engines (Mascot+Percolator or Mascot alone, and PEAKS) is also shown here for comparison. **(B)** Venn diagram showing the performance of the search engines at 5% pep-level FDR (2.5% cFDR).
