# Supplementary material for: An open-source computational and data resource to analyze digital maps of immunopeptidomes
Source: eLife journal article supplement (doi:10.7554/elife.07661), 2015-07-08
Supplement: supp [file elife-07661-supp-v1.zip]

**A**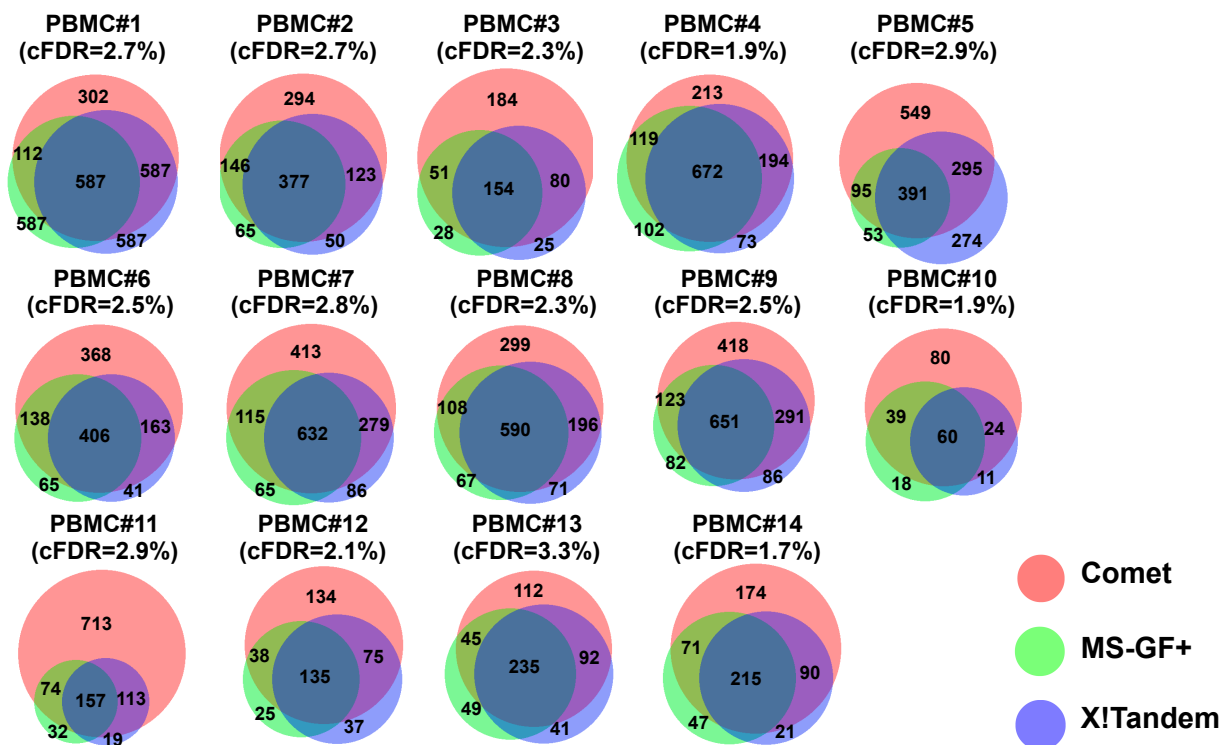**B**

| Sample  | Union<br>(venn diagram) | Intersection<br>(venn diagram) | iProphet |
|---------|-------------------------|--------------------------------|----------|
| PBMC#1  | 1405                    | 587                            | 1362     |
| PBMC#2  | 1055                    | 377                            | 1203     |
| PBMC#3  | 523                     | 154                            | 574      |
| PBMC#4  | 1373                    | 672                            | 1220     |
| PBMC#5  | 1657                    | 391                            | 1281     |
| PBMC#6  | 1181                    | 406                            | 1121     |
| PBMC#7  | 1590                    | 632                            | 1477     |
| PBMC#8  | 1331                    | 590                            | 1178     |
| PBMC#9  | 1651                    | 651                            | 1642     |
| PBMC#10 | 232                     | 60                             | 260      |
| PBMC#11 | 1108                    | 157                            | 1076     |
| PBMC#12 | 444                     | 135                            | 456      |
| PBMC#13 | 574                     | 235                            | 599      |
| PBMC#14 | 618                     | 215                            | 697      |

**Figure 1—figure supplement 2. Combining results of three open-source database search engines in immunopeptidomics using iProphet.** (A) The HLA peptidome of fourteen PBMC samples were analyzed. Venn diagrams show the search results obtained from three database search engines (i.e., Comet, MS-GF+ and X!Tandem) at 5% peptide-level FDR. The search identifications were combined and statistically scored using PeptideProphet and iProphet within the Trans-Proteomic Pipeline (TPP). Following annotation of all identified peptides to their respective HLA allele, all non-annotated peptides were removed from the iProphet combined search result and a corrected false discovery rate (cFDR) was manually calculated based on the target-decoy approach. cFDR is indicated for each PBMC sample. At peptide-level FDR 1%, the cFDR was estimated on average at 0.5%. At peptide-level FDR 5%, the cFDR was estimated at 2.5%. (B) The table shows the number of HLA class I peptides identified from the iProphet combined search results that were used to build the spectral libraries. The sum of peptides identified by the three search engines (Union) as well as the number of overlapping peptides (Intersection) for each venn diagram/sample is also indicated.
