# Supplementary material for: An open-source computational and data resource to analyze digital maps of immunopeptidomes
Source: eLife journal article supplement (doi:10.7554/elife.07661), 2015-07-08
Supplement: supp [file elife-07661-supp-v1.zip]

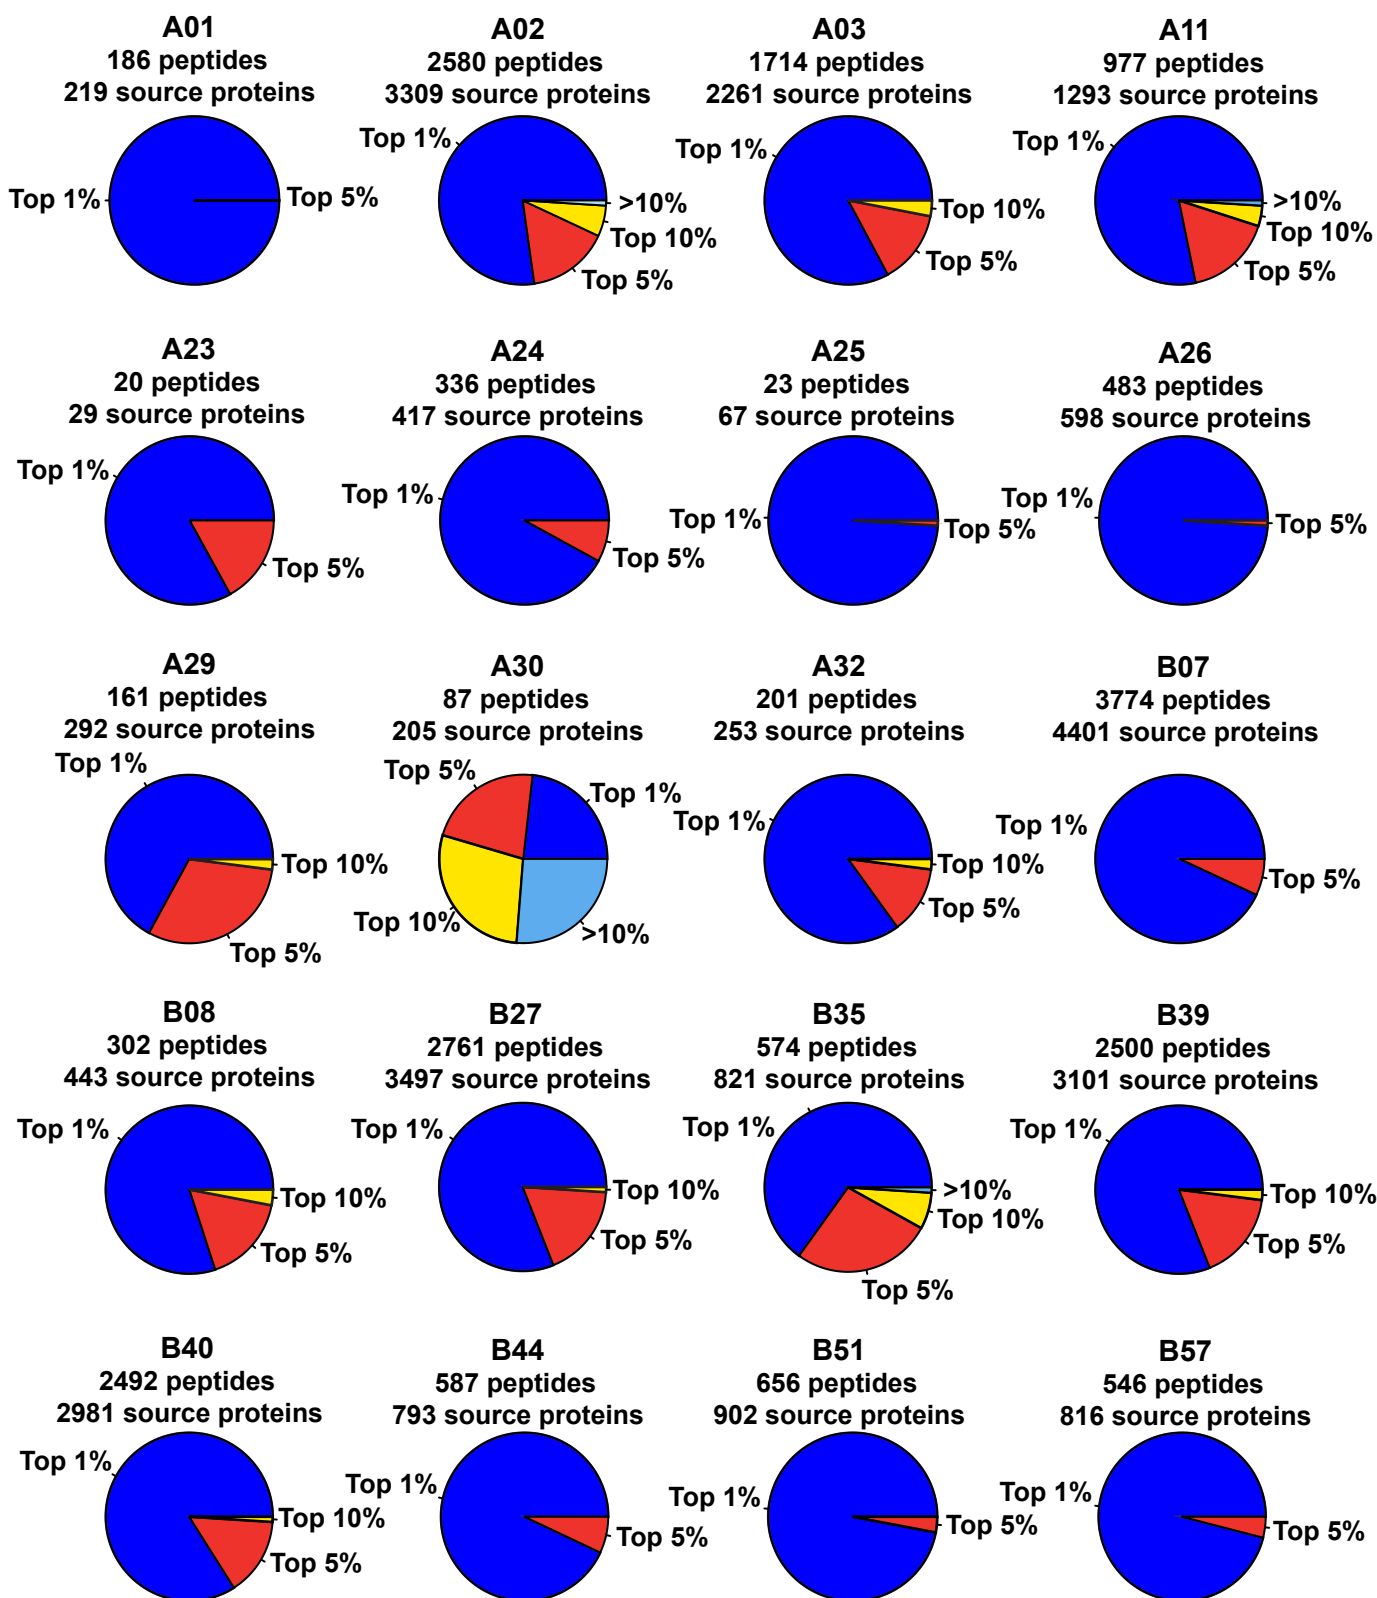

**Figure 2—figure supplement 6. Binding scores of naturally presented HLA-A and -B peptides contained in individual source proteins.** We assessed the predicted HLA binding affinity of all peptides contained in individual source proteins. The pie chart shows the proportion of naturally presented peptides isolated by immunoaffinity chromatography that ranked in the top 1% (blue), top 5% (red), top 10% (yellow), or below the 90th percentile of peptides (pale blue).
