# Supplementary material for: An open-source computational and data resource to analyze digital maps of immunopeptidomes
Source: eLife journal article supplement (doi:10.7554/elife.07661), 2015-07-08
Supplement: supp [file elife-07661-supp-v1.zip]

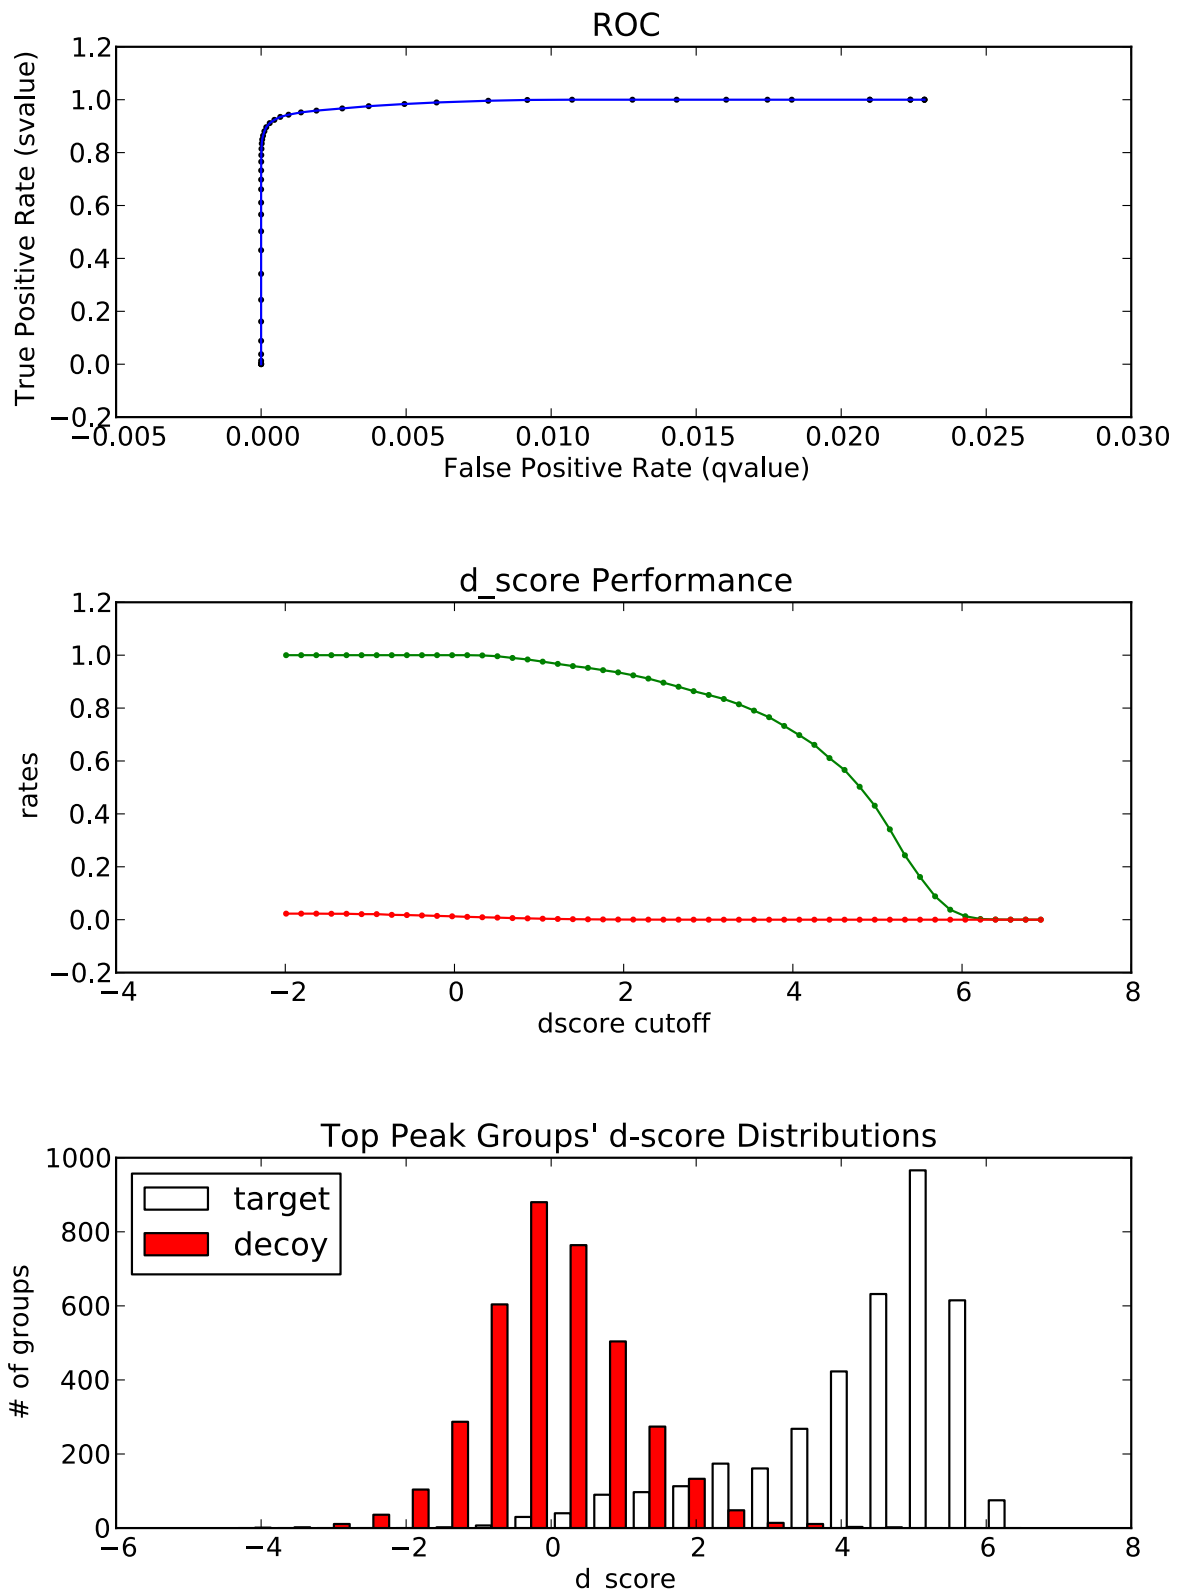

**Figure 3—figure supplement 2. OpenSWATH analysis and PyProphet statistics of HLA peptidomic data acquired at ETH Zurich, Switzerland.** HLA-A02 and HLA-B07 peptides were isolated from JY cells. Graphs showing ROC, d<sub>score</sub> performance and d-score distributions were generated automatically using the iPortal workflow.
