# Supplementary material for: An open-source computational and data resource to analyze digital maps of immunopeptidomes
Source: eLife journal article supplement (doi:10.7554/elife.07661), 2015-07-08
Supplement: supp [file elife-07661-supp-v1.zip]

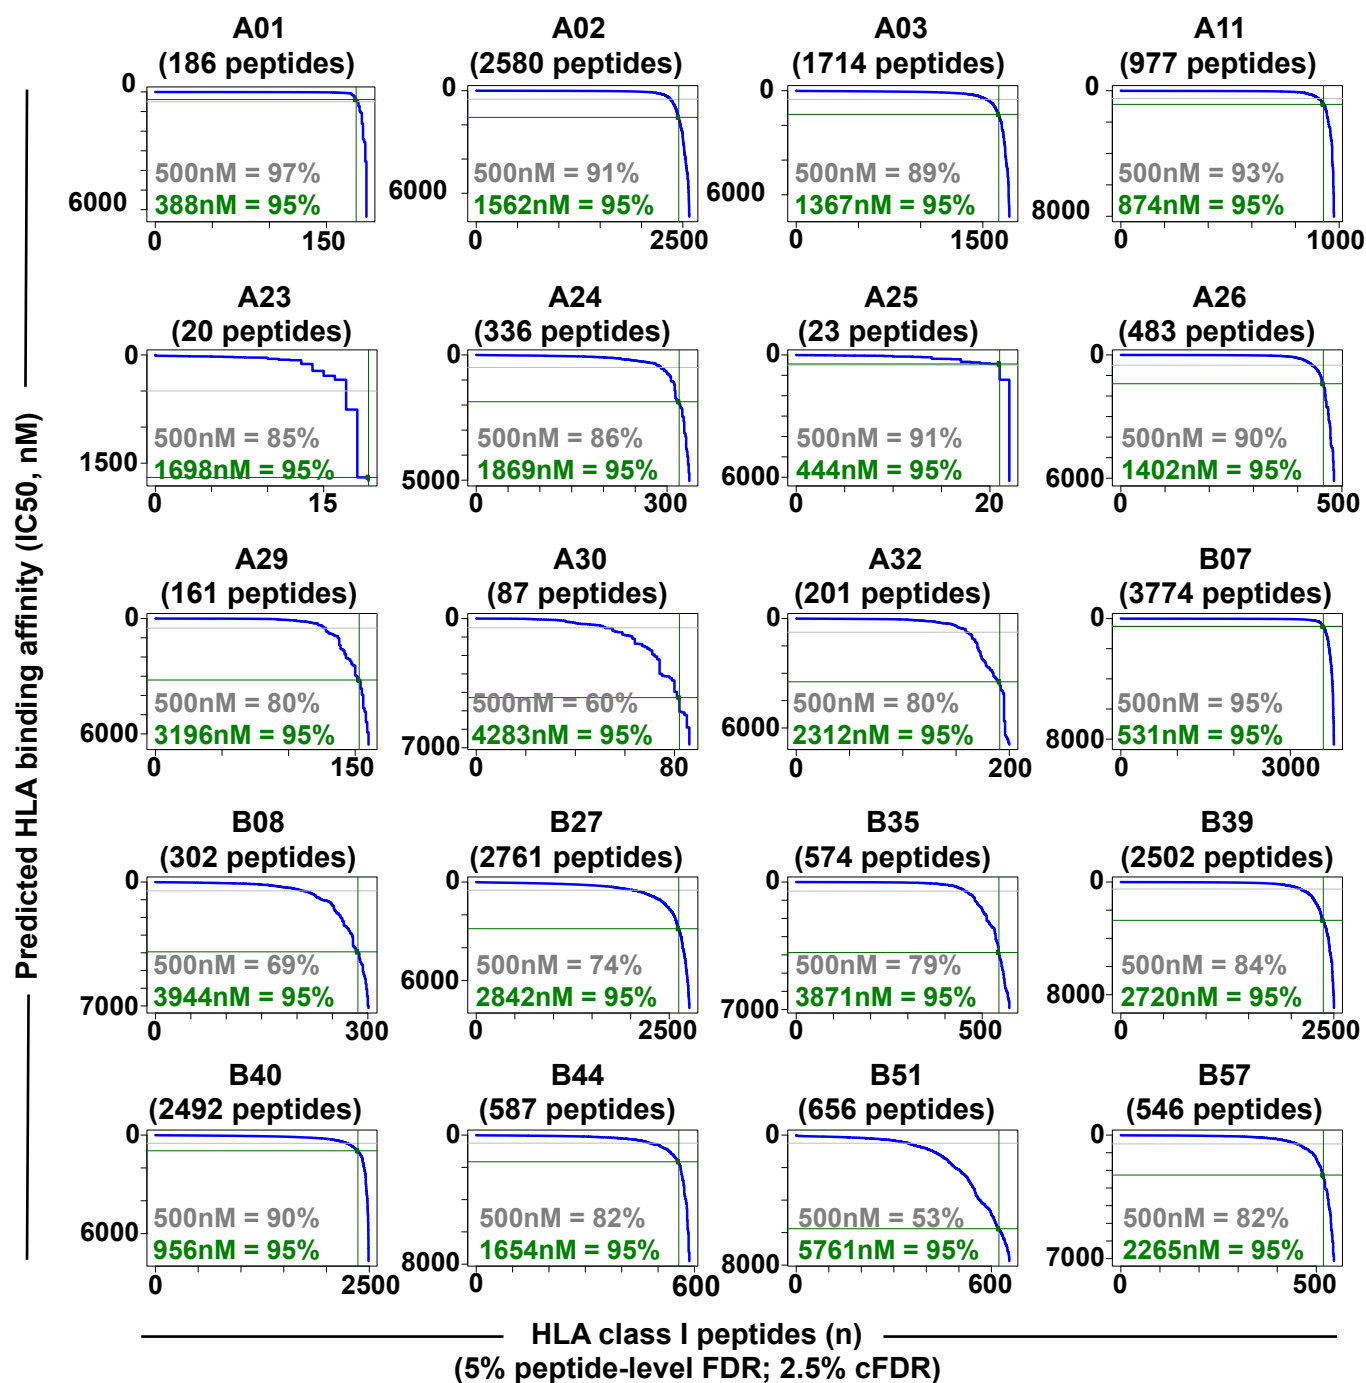

**Figure 2—figure supplement 5. Distribution curves of peptide binding affinities for different HLA-A and -B class I alleles (5% peptide-level FDR; 2.5% cFDR).** The predicted IC50 values of the annotated peptides in Figure 2-source data 3 were used to generate the distribution curves (blue line). The proportion of peptides with a predicted affinity lower than the established 500nM threshold (grey) is indicated for individual HLA alleles. The plots also indicate that 95% of the annotated peptides (green) are predicted to bind their respective HLA molecules with an IC50 ranging from 388 nM (HLA-A01) to 5761 nM (HLA-B51).
