# Supplementary material for: An open-source computational and data resource to analyze digital maps of immunopeptidomes
Source: eLife journal article supplement (doi:10.7554/elife.07661), 2015-07-08
Supplement: supp [file elife-07661-supp-v1.zip]

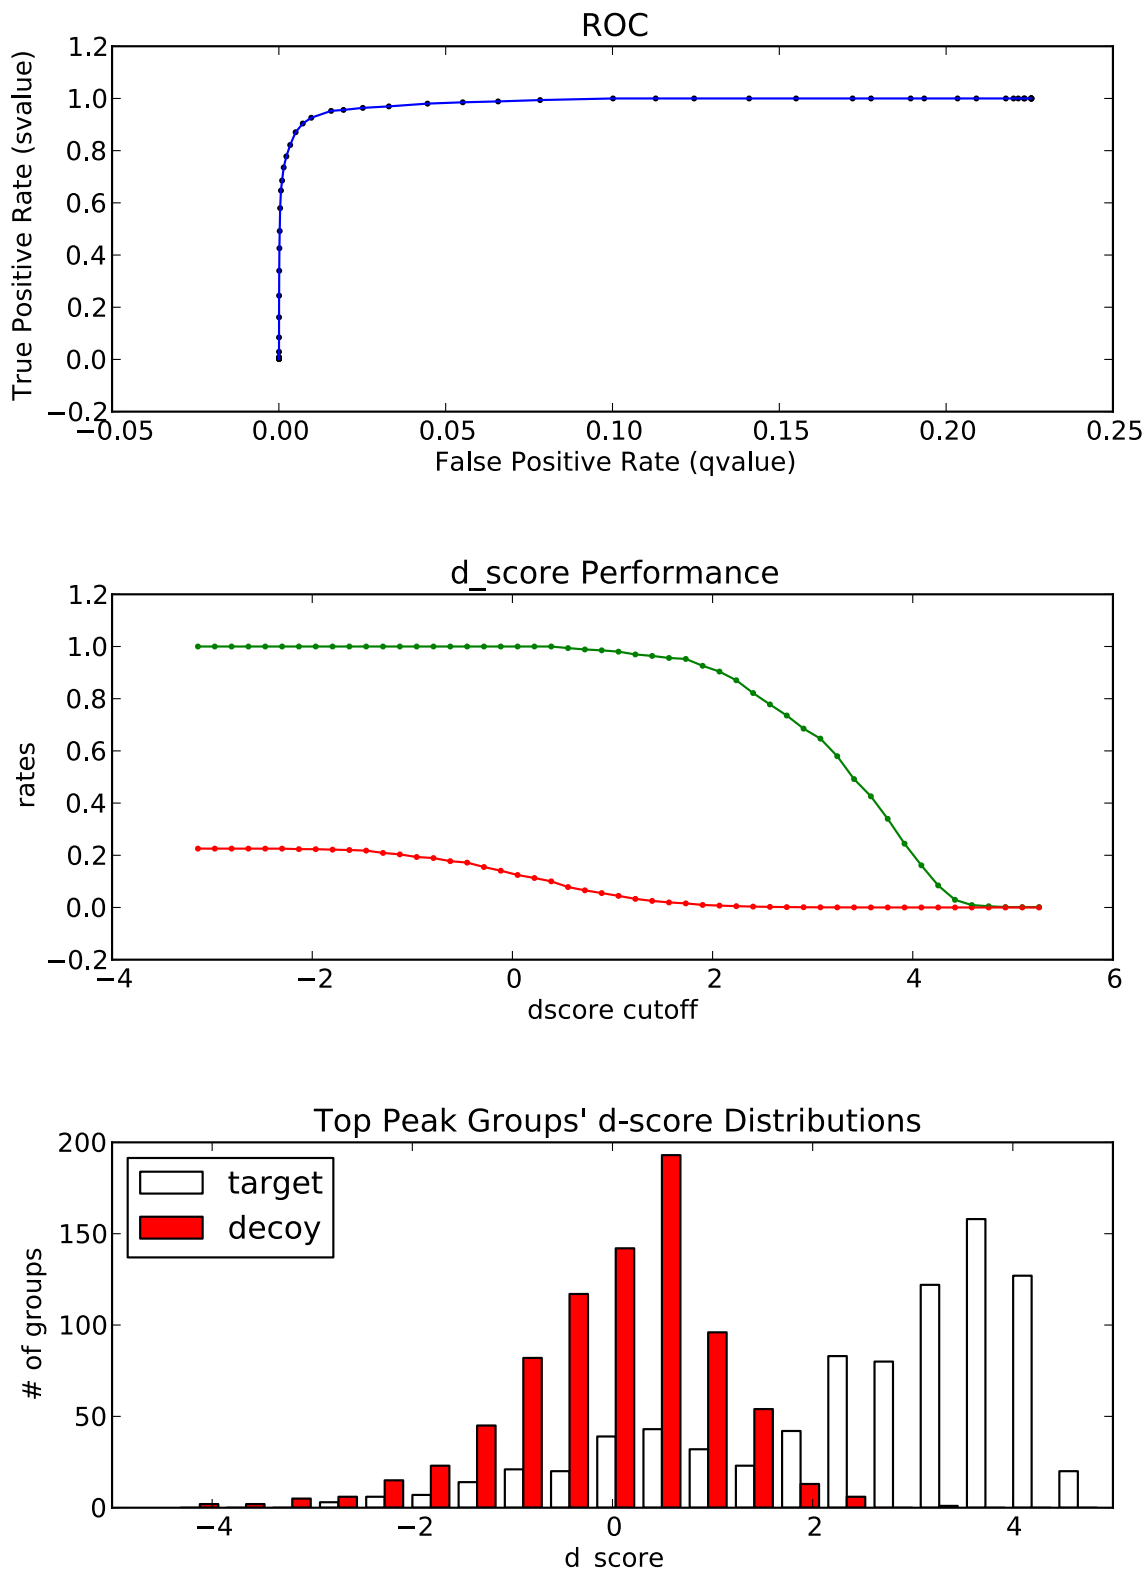

**Figure 3—figure supplement 4. OpenSWATH analysis and PyProphet statistics of HLA peptidomic data acquired at University of Oxford, UK.** HLA-A03, -B07 and -B35 peptides were isolated from Jurkat cells. Graphs showing ROC, d\_score performance and d-score distributions were generated automatically using the iPortal workflow.
