# Supplementary material for: An open-source computational and data resource to analyze digital maps of immunopeptidomes
Source: eLife journal article supplement (doi:10.7554/elife.07661), 2015-07-08
Supplement: supp [file elife-07661-supp-v1.zip]

**A**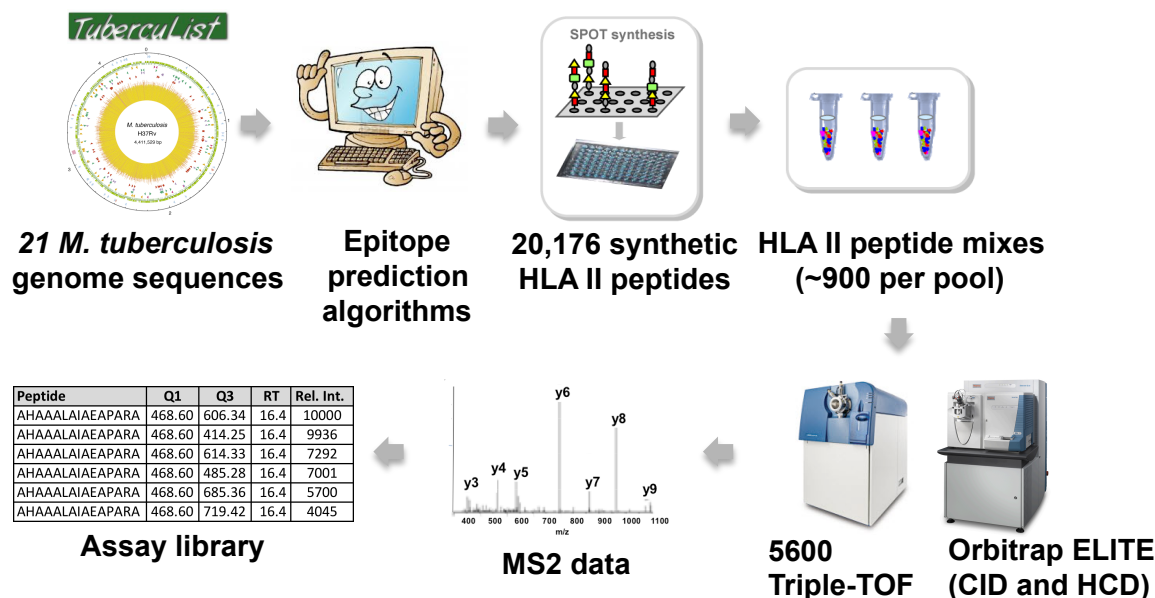**B**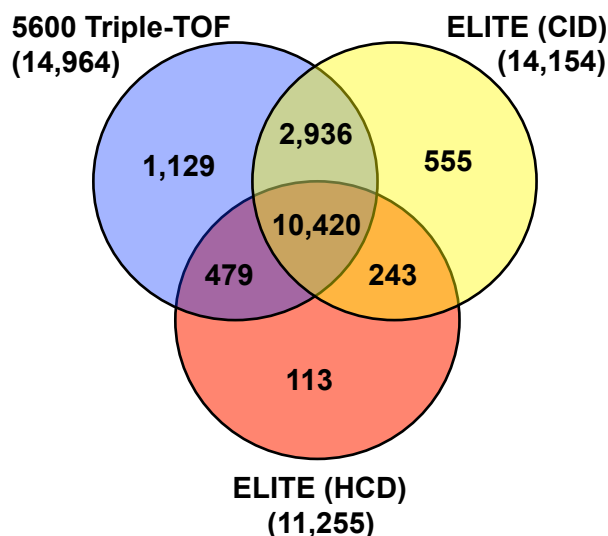**C**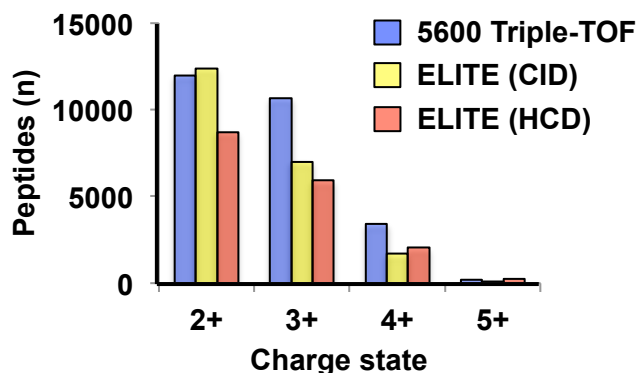

**Figure 2—figure supplement 3. Generation of assay libraries from a large collection of synthetic HLA class II peptides.** (A) Workflow to generate an assay library from synthetic peptides. A total of 20,176 predicted peptides (with a range of 2 to 10 per ORF, and an average of 5), were synthesized and arranged into 23 peptide pools of ~900 peptides (Lindestam Arlehamn et al., PLoS Pathog, 2013). Spiked-in reference iRT peptides were used and the pools of synthetic peptides were analyzed in DDA mode using a 5600 Triple-TOF and an Orbitrap ELITE (CID and HCD fragmentation). The identified peptides were then processed through our computational pipeline to generate the assay library. (B) Venn diagram showing the overlap between peptides identified by the 5600 Triple-TOF and by the ELITE (CID and HCD fragmentation methods). Number of peptides identified is indicated in parenthesis. (C) Histogram showing the distribution of the precursor charge state.
