# Supplementary material for: An open-source computational and data resource to analyze digital maps of immunopeptidomes
Source: eLife journal article supplement (doi:10.7554/elife.07661), 2015-07-08
Supplement: supp [file elife-07661-supp-v1.zip]

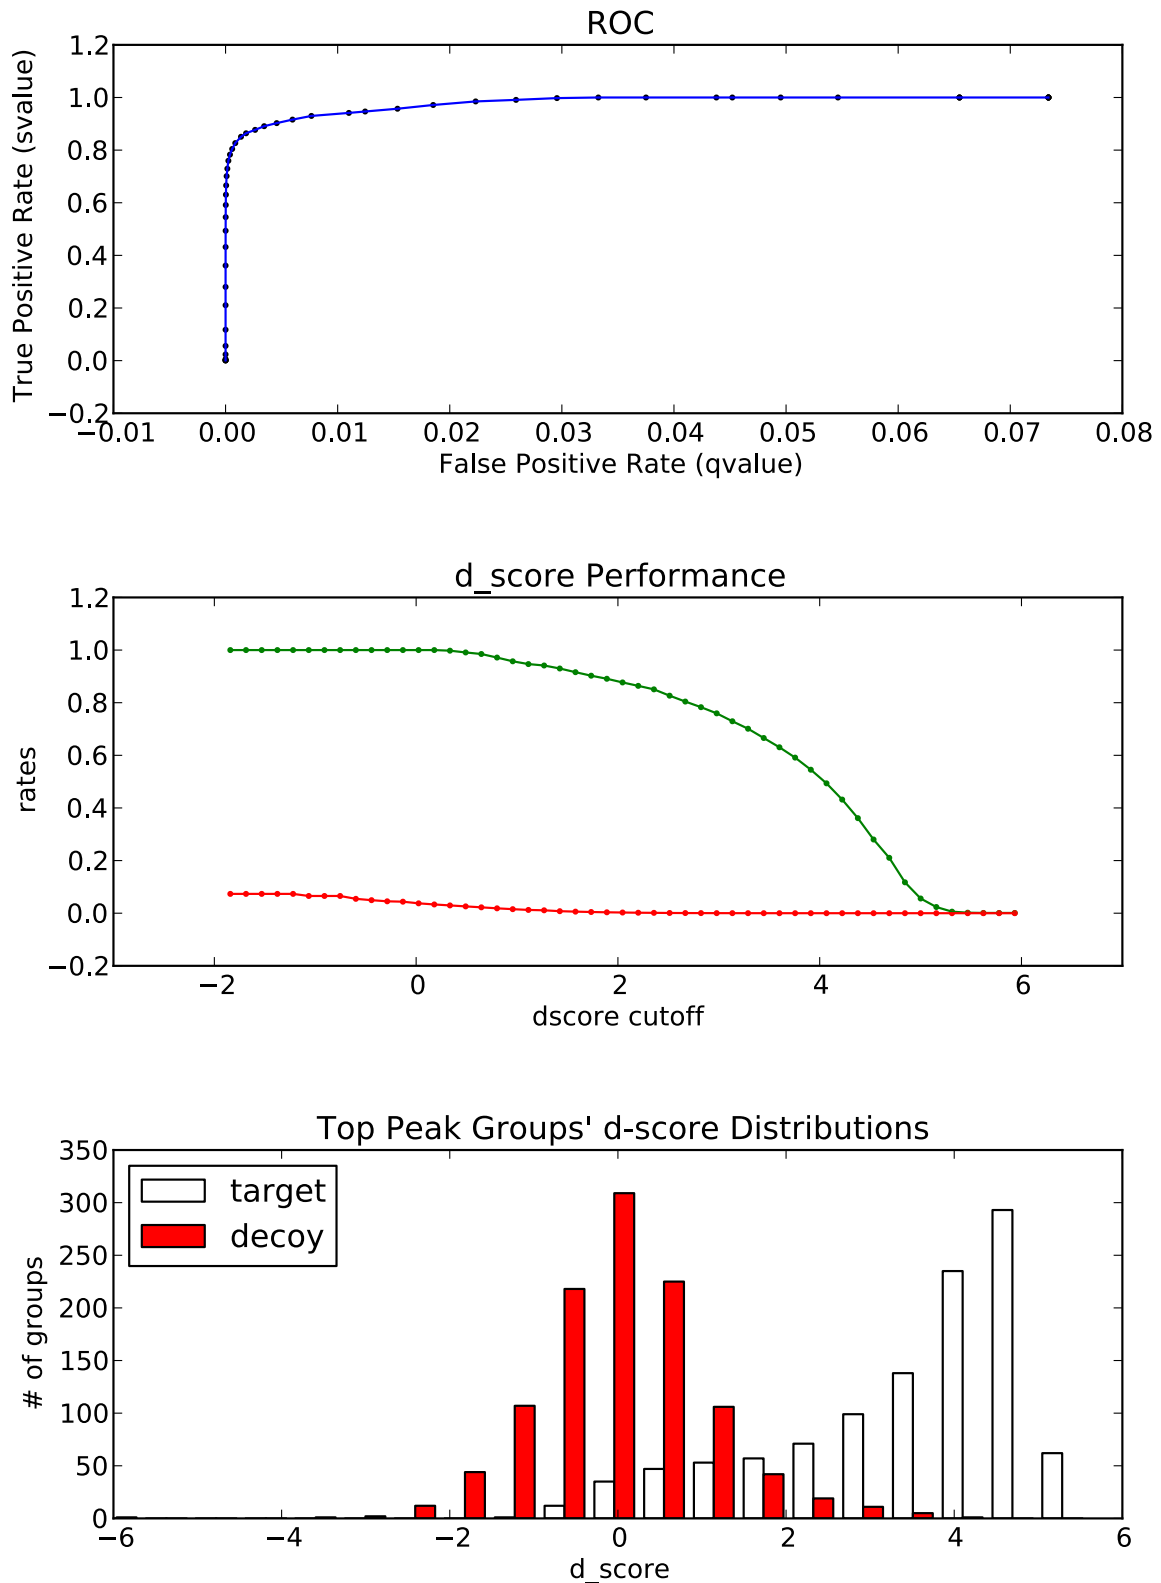

**Figure 3—figure supplement 3. OpenSWATH analysis and PyProphet statistics of HLA peptidomic data acquired at ETH Zurich, Switzerland.** HLA-A03, -A26, -B51 and -B57 peptides were isolated from PBMCs. Graphs showing ROC, d\_score performance and d-score distributions were generated automatically using the iPortal workflow.
