# Supplementary material for: An open-source computational and data resource to analyze digital maps of immunopeptidomes
Source: eLife journal article supplement (doi:10.7554/elife.07661), 2015-07-08
Supplement: supp [file elife-07661-supp-v1.zip]

**A**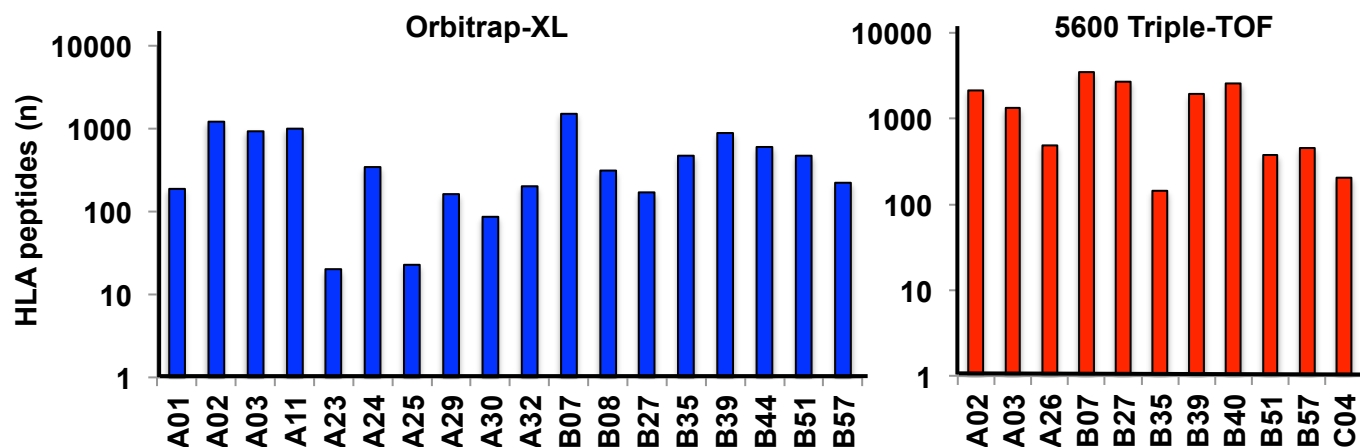**B**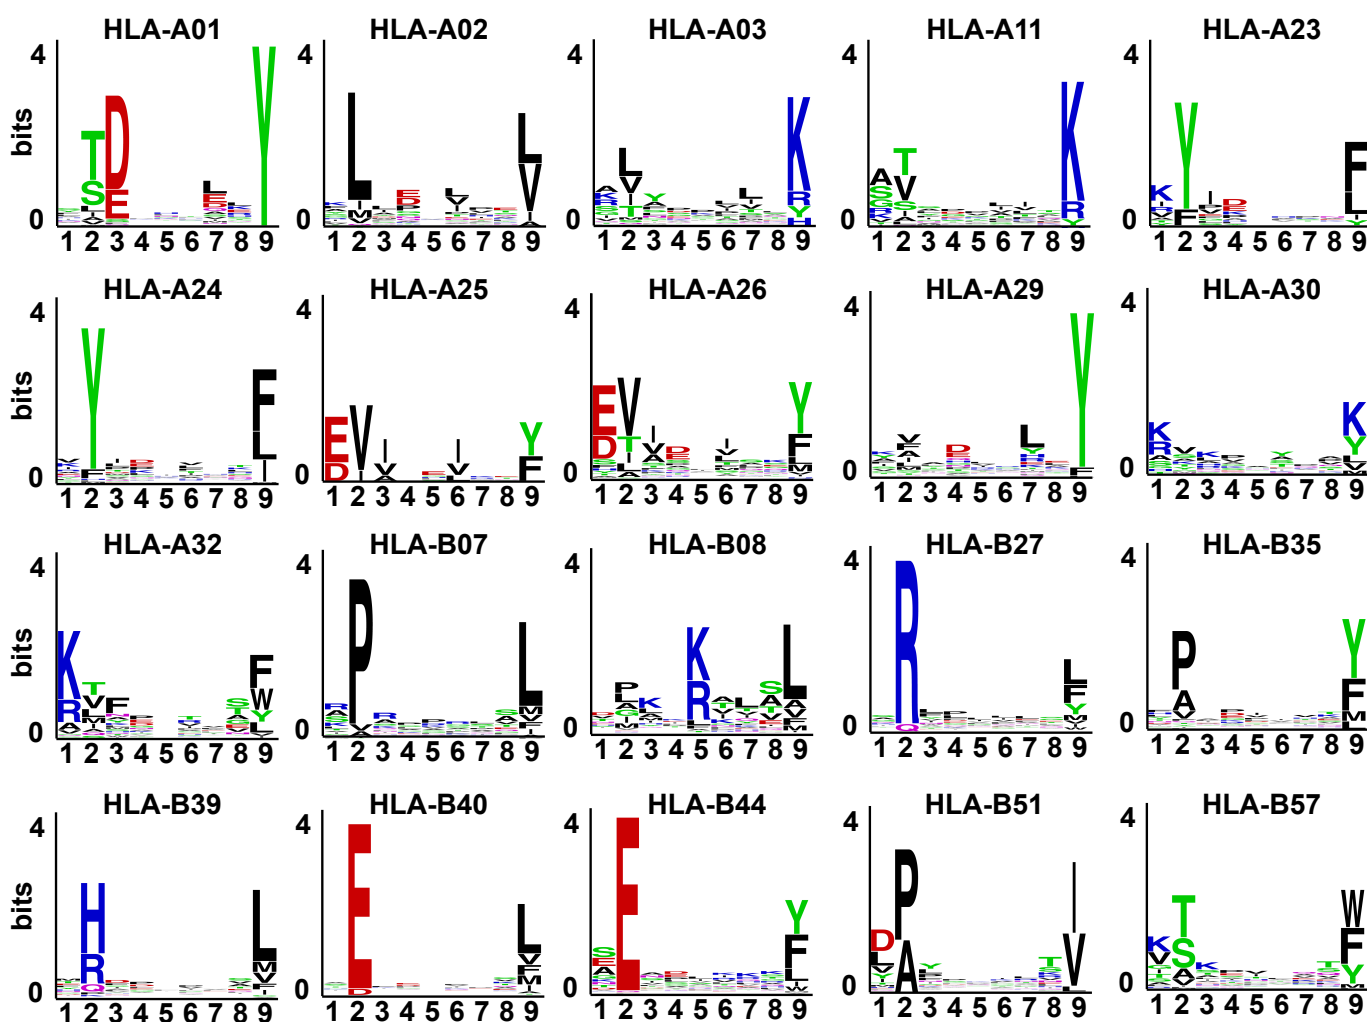

**Figure 2—figure supplement 2. Identification of HLA class I allele-specific peptides by DDA. (A)** Number of distinct HLA class I allele-specific peptides identified using an Orbitrap-XL and a 5600 Triple-TOF at peptide-level FDR 5%. **(B)** Logo showing the profile motif for peptides presented by different HLA-A and -B alleles. Profile motifs were created by using all annotated HLA class I peptides in this study and the sequence logo generator WebLogo.
