# Supplementary material for: An open-source computational and data resource to analyze digital maps of immunopeptidomes
Source: eLife journal article supplement (doi:10.7554/elife.07661), 2015-07-08
Supplement: supp [file elife-07661-supp-v1.zip]

Archive with 25 entries (25 files):
- elife_poa_e07661_Figure_2_figure_supplement_5.pdf
- elife_poa_e07661_Figure_1_figure_supplement_1.pdf
- elife_poa_e07661_Figure_3_figure_supplement_2.pdf
- elife_poa_e07661_Supplementary_file_1.pdf
- elife_poa_e07661_Figure_3_figure_supplement_3.pdf
- elife_poa_e07661_Figure_2_source_data_3.xlsx
- elife_poa_e07661_Source_Code.zip
- elife_poa_e07661_Figure_2_figure_supplement_4.pdf
- elife_poa_e07661_Figure_3_figure_supplement_7.pdf
- elife_poa_e07661_Figure_2_figure_supplement_2.pdf
- elife_poa_e07661_Figure_3_figure_supplement_4.pdf
- elife_poa_e07661_Figure_3_figure_supplement_1.pdf
- elife_poa_e07661_Figure_2_figure_supplement_1.pdf
- elife_poa_e07661_Figure_3_figure_supplement_6.pdf
- elife_poa_e07661_Figure_3_source_data_1.xlsx
- elife_poa_e07661_Figure_2_source_data_5.xlsx
- elife_poa_e07661_Figure_1_source_data_1.xlsx
- elife_poa_e07661_Figure_2_source_data_4.xlsx
- elife_poa_e07661_Figure_2_source_data_2.xlsx
- elife_poa_e07661_Figure_2_figure_supplement_6.pdf
- elife_poa_e07661_Figure_3_figure_supplement_5.pdf
- elife_poa_e07661_Figure_1_figure_supplement_3.pdf
- elife_poa_e07661_Figure_2_source_data_1.xlsx
- elife_poa_e07661_Figure_1_figure_supplement_2.pdf
- elife_poa_e07661_Figure_2_figure_supplement_3.pdf
