# Supplementary material for: An open-source computational and data resource to analyze digital maps of immunopeptidomes
Source: eLife journal article supplement (doi:10.7554/elife.07661), 2015-07-08
Supplement: supp [file elife-07661-supp-v1.zip › elife_poa_e07661_Figure_1_figure_supplement_1.pdf]

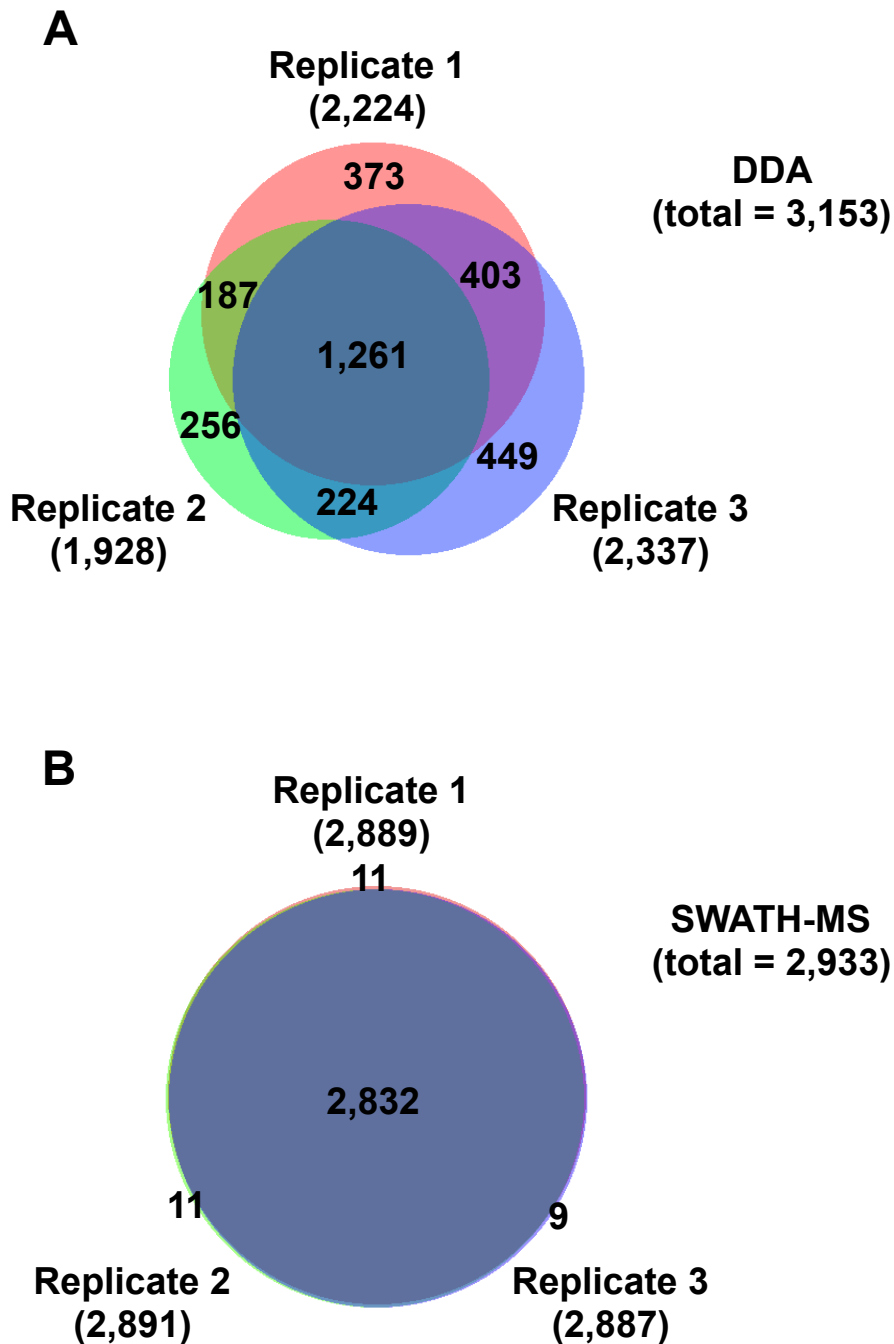

**Figure 1—figure supplement 1. Reproducibility of DDA and SWATH-MS for the identification of HLA class I peptides.** HLA class I peptides were isolated from JY<sup>EBV+</sup> cells. Six technical replicates were consecutively injected in a TripleTOF 5600 MS. The Venn diagrams indicate the number of peptides identified in each analysis and the number of peptides shared between the runs. **(A)** Three datasets were acquired in DDA mode and the peptides were identified using the open-source database search engines (1% peptide-level FDR). **(B)** Three datasets were acquired in SWATH mode and the peptides were identified using OpenSWATH and a combined HLA-A and -B peptide assay library (1% peptide-level FDR).
