# Supplementary material for: An open-source computational and data resource to analyze digital maps of immunopeptidomes
Source: eLife journal article supplement (doi:10.7554/elife.07661), 2015-07-08
Supplement: supp [file elife-07661-supp-v1.zip › elife_poa_e07661_Figure_1_source_data_1.xlsx]

## Sheet: DDA_n=1
Figure 1-source data 1. Comparative analysis of DDA and SWATH-MS for the identification of HLA class I peptides. List of JY HLA-A and -B peptides that were identified by DDA (n=1) and then annotated using the computational workflow (1% pep-level FDR).
NetMHC (IC50; nM)
A02	B07	Peptide	Peptide_mod_ion	Annotation score	HLA allele	Length	Source protein
2	22167	GLLGYLHFV	GLLGYLHFV/2	11083.5	A02	9	sp|Q14442|PIGH_HUMAN
2	21860	FLNDEVWNL	FLNDEVWNL/2	10930	A02	9	sp|O95825|QORL1_HUMAN
2	21357	FLFDTQHFI	FLFDTQHFI/2	10678.5	A02	9	sp|Q9H583|HEAT1_HUMAN
2	20634	ILVDWLVEV	ILVDWLVEV/2	10317	A02	9	sp|P20248|CCNA2_HUMAN
2	20500	FLFDGSPTYV	FLFDGSPTYV/2	10250	A02	10	sp|P49327|FAS_HUMAN
2	20489	ILIDWLVQV	ILIDWLVQV/2	10244.5	A02	9	sp|P14635|CCNB1_HUMAN
2	20327	VLLGHIFYV	VLLGHIFYV/2	10163.5	A02	9	sp|Q9Y6X3|SCC4_HUMAN
2	20051	FTWEGLYNV	FTWEGLYNV/2	10025.5	A02	9	sp|P51784|UBP11_HUMAN
2	19411	FLLEKGYEV	FLLEKGYEV/2	9705.5	A02	9	sp|O60547|GMDS_HUMAN
2	19369	LLIDIIHFL	LLIDIIHFL/2	9684.5	A02	9	sp|Q86VV8|RTTN_HUMAN
2	18091	SLFEGTWYL	SLFEGTWYL/2	9045.5	A02	9	sp|Q01581|HMCS1_HUMAN
2	17989	YLADLYHFV	YLADLYHFV/2	8994.5	A02	9	sp|Q9Y3L3|3BP1_HUMAN
2	17887	FLHEVLWEL	FLHEVLWEL/2	8943.5	A02	9	sp|Q7Z333|SETX_HUMAN
2	17734	RLYDGLFKV	RLYDGLFKV/2	8867	A02	9	sp|Q16531|DDB1_HUMAN
2	16892	YLLDMPLWYL	YLLDM[147]PLWYL/2	8446	A02	10	sp|P11388|TOP2A_HUMAN
2	16810	MLIGEIFEL	M[147]LIGEIFEL/2	8405	A02	9	sp|Q7Z3C6|ATG9A_HUMAN
2	16672	YLWDLDHGFAGV	YLWDLDHGFAGV/2	8336	A02	12	sp|P47756|CAPZB_HUMAN
2	16232	YLNDLIHSV	YLNDLIHSV/2	8116	A02	9	sp|O43572|AKA10_HUMAN
2	16054	LLWDYVYQL	LLWDYVYQL/2	8027	A02	9	sp|Q9Y603|ETV7_HUMAN
1	8017	KLMDHIYAV	KLM[147]DHIYAV/2	8017	A02	9	sp|Q9UP83|COG5_HUMAN
2	15976	RLYDAMIYV	RLYDAM[147]IYV/2	7988	A02	9	sp|Q8N3P4|VPS8_HUMAN
3	23062	KMPDDVWLV	KM[147]PDDVWLV/2	7687.33	A02	9	sp|Q8WXG6|MADD_HUMAN
3	22534	GLYELVWRV	GLYELVWRV/2	7511.33	A02	9	sp|Q96E22|NGBR_HUMAN
2	15007	FLFDHLLTL	FLFDHLLTL/2	7503.5	A02	9	sp|Q7L2H7|EIF3M_HUMAN
3	22495	LLLDVVYKV	LLLDVVYKV/2	7498.33	A02	9	sp|Q9Y2Q0|AT8A1_HUMAN
3	22354	KLLEKLYKV	KLLEKLYKV/3	7451.33	A02	9	sp|Q15034|HERC3_HUMAN
3	22254	GLIDEIYGI	GLIDEIYGI/2	7418	A02	9	sp|Q96AX1|VP33A_HUMAN
3	22194	YLLRSLDYV	YLLRSLDYV/2	7398	A02	9	sp|Q9NS86|LANC2_HUMAN
3	22088	KLLEYIEEI	KLLEYIEEI/2	7362.67	A02	9	sp|O75330|HMMR_HUMAN
3	22022	VLSELLWQV	VLSELLWQV/2	7340.67	A02	9	sp|Q93008|USP9X_HUMAN
3	21758	FLTEFINYI	FLTEFINYI/2	7252.67	A02	9	sp|Q96HY6|DDRGK_HUMAN
3	21482	NLLDLLTEV	NLLDLLTEV/2	7160.67	A02	9	sp|Q9H3U1|UN45A_HUMAN
3	21472	FMFDEKLVTV	FM[147]FDEKLVTV/2	7157.33	A02	10	sp|O00743|PPP6_HUMAN
3	21455	GLLDLPFRV	GLLDLPFRV/2	7151.67	A02	9	sp|A6NHR9|SMHD1_HUMAN
3	21426	TLADVLYHV	TLADVLYHV/2	7142	A02	9	sp|Q9UBL3|ASH2L_HUMAN
3	21232	VLNEYFHNV	VLNEYFHNV/2	7077.33	A02	9	sp|P53680|AP2S1_HUMAN
3	21026	TLAGLIPFV	TLAGLIPFV/2	7008.67	A02	9	sp|Q5SWH9|TMM69_HUMAN
3	20756	LLNDHIYVV	LLNDHIYVV/2	6918.67	A02	9	sp|Q53G59|KLH12_HUMAN
3	20668	ILVDWLVQV	ILVDWLVQV/2	6889.33	A02	9	sp|O95067|CCNB2_HUMAN
3	20594	KLWDNELQYV	KLWDNELQYV/2	6864.67	A02	10	sp|P49354|FNTA_HUMAN
3	20246	YLFDLPLKV	YLFDLPLKV/2	6748.67	A02	9	sp|Q5VUJ6|LRCH2_HUMAN
3	20096	VLIKWFPEV	VLIKWFPEV/2	6698.67	A02	9	sp|Q9HBH0|RHOF_HUMAN
3	20026	KLLFWVTEV	KLLFWVTEV/2	6675.33	A02	9	sp|Q8NFH4|NUP37_HUMAN
2	13322	ILMEHIHKL	ILM[147]EHIHKL/2	6661	A02	9	sp|P84098|RL19_HUMAN
3	19867	FLEKLLPPV	FLEKLLPPV/2	6622.33	A02	9	sp|O95372|LYPA2_HUMAN
3	19786	LMVDHVTEV	LMVDHVTEV/2	6595.33	A02	9	sp|Q9HD15|SRA1_HUMAN
3	19735	FLFPVYPLI	FLFPVYPLI/2	6578.33	A02	9	sp|Q9H6U8|ALG9_HUMAN
3	19635	FIFDVHVHEV	FIFDVHVHEV/3	6545	A02	10	sp|O15031|PLXB2_HUMAN
2	13010	RLMEPIYLV	RLM[147]EPIYLV/2	6505	A02	9	sp|P13639|EF2_HUMAN
3	19460	ILLPSVFGV	ILLPSVFGV/2	6486.67	A02	9	sp|Q53EU6|GPAT3_HUMAN
3	19338	YLDNGVVFV	YLDNGVVFV/2	6446	A02	9	sp|Q16531|DDB1_HUMAN
3	19302	FLDHIIASV	FLDHIIASV/2	6434	A02	9	sp|Q7LBC6|KDM3B_HUMAN
3	19187	FMVDKAIYL	FM[147]VDKAIYL/2	6395.67	A02	9	sp|Q8TC92|ENOX1_HUMAN
3	19168	NLFEWHFTV	NLFEWHFTV/2	6389.33	A02	9	sp|Q9Y385|UB2J1_HUMAN
3	18811	YMSDSFINV	YM[147]SDSFINV/2	6270.33	A02	9	sp|Q8N954|GPT11_HUMAN
3	18399	MLDDRAYLV	M[147]LDDRAYLV/2	6133	A02	9	sp|Q5SRE5|NU188_HUMAN
3	18304	YMIDNVILLI	YM[147]IDNVILLI/2	6101.33	A02	10	sp|P61421|VA0D1_HUMAN
3	18156	ALLPYFVYV	ALLPYFVYV/2	6052	A02	9	sp|Q9Y6J9|TAF6L_HUMAN
3	18139	MLNEHDFEV	M[147]LNEHDFEV/2	6046.33	A02	9	sp|P38398|BRCA1_HUMAN
3	17869	YLDASLITV	YLDASLITV/2	5956.33	A02	9	sp|Q14562|DHX8_HUMAN
3	17800	KMLEKLPEL	KM[147]LEKLPEL/2	5933.33	A02	9	sp|Q9NUQ8|ABCF3_HUMAN
3	17673	YMINFIHKL	YM[147]INFIHKL/3	5891	A02	9	sp|P28347|TEAD1_HUMAN
3	17606	GMIPYLPEL	GM[147]IPYLPEL/2	5868.67	A02	9	sp|Q92973|TNPO1_HUMAN
3	17546	YLHSYLTYI	YLHSYLTYI/2	5848.67	A02	9	sp|Q9UHB9|SRP68_HUMAN
2	11610	YLFPGIPEL	YLFPGIPEL/2	5805	A02	9	sp|Q8NFF5|FAD1_HUMAN
3	17107	KLLDILSYL	KLLDILSYL/2	5702.33	A02	9	sp|O15091|MRRP3_HUMAN
3	17090	ALLDWVTSV	ALLDWVTSV/2	5696.67	A02	9	sp|Q9UPN3|MACF1_HUMAN
3	17007	YLNHLEPPV	YLNHLEPPV/2	5669	A02	9	sp|Q8TAT6|NPL4_HUMAN
2	11244	FLFDGSPTYVL	FLFDGSPTYVL/2	5622	A02	11	sp|P49327|FAS_HUMAN
3	16741	SLYDYNPNL	SLYDYNPNL/2	5580.33	A02	9	sp|Q99613|EIF3C_HUMAN
3	16573	KLLDVVHPA	KLLDVVHPA/2	5524.33	A02	9	sp|Q99832|TCPH_HUMAN
3	16544	KLLDLMPRL	KLLDLM[147]PRL/3	5514.67	A02	9	sp|Q96HW7|INT4_HUMAN
4	21768	FLLDKKIGV	FLLDKKIGV/2	5442	A02	9	sp|P78371|TCPB_HUMAN
4	21737	TLIEDILGV	TLIEDILGV/2	5434.25	A02	9	sp|Q8TEL6|TP4AP_HUMAN
3	16296	KIVDFSYSV	KIVDFSYSV/2	5432	A02	9	sp|O60566|BUB1B_HUMAN
3	16283	LLMEHIQEI	LLM[147]EHIQEI/2	5427.67	A02	9	sp|Q96SN8|CK5P2_HUMAN
4	21689	LLLEILHEI	LLLEILHEI/2	5422.25	A02	9	sp|Q96HE7|ERO1A_HUMAN
3	16220	YLDGHLITTV	YLDGHLITTV/2	5406.67	A02	10	sp|O95544|NADK_HUMAN
3	16182	FLINFIHTL	FLINFIHTL/2	5394	A02	9	sp|O15031|PLXB2_HUMAN
4	21467	LLADELITV	LLADELITV/2	5366.75	A02	9	sp|Q9NR46|SHLB2_HUMAN
4	21346	KIIDLLPKV	KIIDLLPKV/2	5336.5	A02	9	sp|O15111|IKKA_HUMAN
3	16007	LMISRTPEV	LM[147]ISRTPEV/2	5335.67	A02	9	sp|P01857|IGHG1_HUMAN
4	21337	YLDEIVKEV	YLDEIVKEV/2	5334.25	A02	9	sp|P12270|TPR_HUMAN
3	15919	YLDPSVLSGV	YLDPSVLSGV/2	5306.33	A02	10	sp|Q15041|AR6P1_HUMAN
4	21207	YLDRFLAGV	YLDRFLAGV/2	5301.75	A02	9	sp|P30279|CCND2_HUMAN
2	10491	ALWGFFPV	ALWGFFPV/2	5245.5	A02	8	sp|Q9NPA0|EMC7_HUMAN
3	15649	YLTDRVMTV	YLTDRVMTV/2	5216.33	A02	9	sp|O15379|HDAC3_HUMAN
4	20826	TLADLVHHV	TLADLVHHV/2	5206.5	A02	9	sp|Q9Y4A5|TRRAP_HUMAN
3	15545	FILEHIMVV	FILEHIM[147]VV/2	5181.67	A02	9	sp|Q6ZS81|WDFY4_HUMAN
4	20720	LLFDSVIHL	LLFDSVIHL/2	5180	A02	9	sp|Q9BZM1|PG12A_HUMAN
3	15462	FMLKDMLYL	FM[147]LKDM[147]LYL/2	5154	A02	9	sp|Q53EQ6|TIGD5_HUMAN
3	15424	FLSDGTIISV	FLSDGTIISV/2	5141.33	A02	10	sp|Q969X6|CIR1A_HUMAN
4	20432	GLLEGLVEV	GLLEGLVEV/2	5108	A02	9	sp|Q6R327|RICTR_HUMAN
3	15208	YLDPRLAFTV	YLDPRLAFTV/2	5069.33	A02	10	sp|Q9NZC7|WWOX_HUMAN
4	20265	ALFPLLPKV	ALFPLLPKV/2	5066.25	A02	9	sp|O96006|ZBED1_HUMAN
4	20149	SLLDPVPEV	SLLDPVPEV/2	5037.25	A02	9	sp|Q92616|GCN1L_HUMAN
3	14956	WLVDHVYAI	WLVDHVYAI/2	4985.33	A02	9	sp|P30153|2AAA_HUMAN
4	19705	ILDEVIFKL	ILDEVIFKL/2	4926.25	A02	9	sp|Q15051|IQCB1_HUMAN
4	19673	GLLDCPIFL	GLLDCPIFL/2	4918.25	A02	9	sp|Q9BXW9|FACD2_HUMAN
4	19612	FLMNEVIKL	FLM[147]NEVIKL/2	4903	A02	9	sp|Q9BXL7|CAR11_HUMAN
4	19595	ALITRIFGV	ALITRIFGV/2	4898.75	A02	9	sp|Q6YHU6|THADA_HUMAN
4	19464	GLLDAVTYL	GLLDAVTYL/2	4866	A02	9	sp|Q9UP65|PA24C_HUMAN
4	19390	KLLEVQILEV	KLLEVQILEV/2	4847.5	A02	10	sp|Q8IWJ2|GCC2_HUMAN
4	19387	GLADKVYFL	GLADKVYFL/2	4846.75	A02	9	sp|P27708|PYR1_HUMAN
4	19317	ALFEEVPEL	ALFEEVPEL/2	4829.25	A02	9	sp|P31939|PUR9_HUMAN
3	14397	YLLDLHSYLL	YLLDLHSYLL/2	4799	A02	10	sp|O60337|MARH6_HUMAN
4	19142	SLIEKYFSV	SLIEKYFSV/2	4785.5	A02	9	sp|P52292|IMA1_HUMAN
2	9566	SLMDHTIPEV	SLM[147]DHTIPEV/2	4783	A02	10	sp|O00560|SDCB1_HUMAN
3	14336	FLLKLTPLL	FLLKLTPLL/2	4778.67	A02	9	sp|O75448|MED24_HUMAN
4	19090	FLIEPEHVNTV	FLIEPEHVNTV/2	4772.5	A02	11	sp|Q96JH7|VCIP1_HUMAN
4	19075	SLLRSIFTV	SLLRSIFTV/2	4768.75	A02	9	sp|Q92830|KAT2A_HUMAN
4	18956	RLLEGYEIYV	RLLEGYEIYV/2	4739	A02	10	sp|Q14676|MDC1_HUMAN
2	9473	YMIAHITGL	YM[147]IAHITGL/2	4736.5	A02	9	sp|P04818|TYSY_HUMAN
3	14181	FMNPHLISV	FM[147]NPHLISV/2	4727	A02	9	sp|Q9UG01|IF172_HUMAN
4	18889	KIIDFIYTA	KIIDFIYTA/2	4722.25	A02	9	sp|Q9P2N7|KLH13_HUMAN
3	14055	RLLDYVATV	RLLDYVATV/2	4685	A02	9	sp|Q9NR09|BIRC6_HUMAN
4	18720	FLDHVMYTI	FLDHVM[147]YTI/2	4680	A02	9	sp|Q13422|IKZF1_HUMAN
4	18678	FLLDGFPRTV	FLLDGFPRTV/2	4669.5	A02	10	sp|P54819|KAD2_HUMAN
3	14007	KMAELVHFL	KM[147]AELVHFL/2	4669	A02	9	sp|P43365|MAGAC_HUMAN
4	18636	KLWSETFDV	KLWSETFDV/2	4659	A02	9	sp|Q9NR81|ARHG3_HUMAN
3	13967	FMIDASVHPTL	FM[147]IDASVHPTL/2	4655.67	A02	11	sp|P86790|CCZ1B_HUMAN
4	18475	MITDVVPEV	M[147]ITDVVPEV/2	4618.75	A02	9	sp|O94842|TOX4_HUMAN
3	13592	KLYDGFQYL	KLYDGFQYL/2	4530.67	A02	9	sp|Q9UBF8|PI4KB_HUMAN
3	13574	FLWDVPSNWTL	FLWDVPSNWTL/2	4524.67	A02	11	sp|P49327|FAS_HUMAN
3	13485	FLWDEGFHQL	FLWDEGFHQL/2	4495	A02	10	sp|Q13724|MOGS_HUMAN
4	17919	KLIGQVHEV	KLIGQVHEV/2	4479.75	A02	9	sp|Q5TBA9|FRY_HUMAN
4	17914	FLLPPVFNI	FLLPPVFNI/2	4478.5	A02	9	sp|P17181|INAR1_HUMAN
4	17896	RLLDYVVNI	RLLDYVVNI/2	4474	A02	9	sp|Q63ZY3|KANK2_HUMAN
4	17867	YLAHFIEGL	YLAHFIEGL/2	4466.75	A02	9	sp|Q9C0E2|XPO4_HUMAN
4	17863	YLHDFLKYL	YLHDFLKYL/3	4465.75	A02	9	sp|Q15014|MO4L2_HUMAN
4	17862	YLLPAIVHI	YLLPAIVHI/2	4465.5	A02	9	sp|Q92841|DDX17_HUMAN
5	22265	GLTEALHFV	GLTEALHFV/2	4453	A02	9	sp|P07199|CENPB_HUMAN
4	17802	FLIAQLPKL	FLIAQLPKL/2	4450.5	A02	9	sp|Q12768|STRUM_HUMAN
4	17794	VLFDVSIMAV	VLFDVSIM[147]AV/2	4448.5	A02	10	sp|Q9BV38|WDR18_HUMAN
4	17781	FLFRDILEL	FLFRDILEL/2	4445.25	A02	9	sp|Q9NRR4|RNC_HUMAN
4	17717	FLAEDALNTV	FLAEDALNTV/2	4429.25	A02	10	sp|Q08345|DDR1_HUMAN
4	17708	SIIDWLNSV	SIIDWLNSV/2	4427	A02	9	sp|Q9NVW2|RNF12_HUMAN
5	22090	GQIEVVPEV	GQIEVVPEV/2	4418	A02	9	sp|Q92576|PHF3_HUMAN
4	17543	VLIEGSINSV	VLIEGSINSV/2	4385.75	A02	10	sp|P59998|ARPC4_HUMAN
4	17336	ILMHHPPQV	ILM[147]HHPPQV/2	4334	A02	9	sp|Q7Z5Y7|KCD20_HUMAN
4	17216	YMAELIERL	YM[147]AELIERL/2	4304	A02	9	sp|O75496|GEMI_HUMAN
4	17154	KLNPGIAYV	KLNPGIAYV/2	4288.5	A02	9	sp|Q9NVG8|TBC13_HUMAN
5	21340	SLLDEFYKL	SLLDEFYKL/2	4268	A02	9	sp|Q14444|CAPR1_HUMAN
3	12803	YLLDLHSYL	YLLDLHSYL/2	4267.67	A02	9	sp|O60337|MARH6_HUMAN
5	21338	YLNQHIEHV	YLNQHIEHV/2	4267.6	A02	9	sp|P28715|ERCC5_HUMAN
5	21218	FLGIHVFLV	FLGIHVFLV/2	4243.6	A02	9	sp|Q9Y679|AUP1_HUMAN
5	21214	KVIDEIYRV	KVIDEIYRV/3	4242.8	A02	9	sp|Q9NVF7|FBX28_HUMAN
4	16873	YLLESVNKL	YLLESVNKL/2	4218.25	A02	9	sp|P05120|PAI2_HUMAN
3	12639	YLLEKFVAV	YLLEKFVAV/2	4213	A02	9	sp|A8MPP1|D11L8_HUMAN
5	21042	FLPPSFPIV	FLPPSFPIV/2	4208.4	A02	9	sp|Q9HAU8|RNPL1_HUMAN
5	20881	VLIRDLNFEV	VLIRDLNFEV/2	4176.2	A02	10	sp|P28288|ABCD3_HUMAN
2	8337	VLMPWIHEL	VLM[147]PWIHEL/2	4168.5	A02	9	sp|Q9C000|NALP1_HUMAN
4	16657	ILLDRLLYL	ILLDRLLYL/2	4164.25	A02	9	sp|Q96FB5|RRNAD_HUMAN
5	20811	SLPDFGISYV	SLPDFGISYV/2	4162.2	A02	10	sp|Q86UX7|URP2_HUMAN
4	16642	FVDDYTVRV	FVDDYTVRV/2	4160.5	A02	9	sp|O00487|PSDE_HUMAN
3	12476	VLMEMSYRL	VLM[147]EM[147]SYRL/2	4158.67	A02	9	sp|Q6PCD5|RFWD3_HUMAN
4	16571	KLLDLSDSTSV	KLLDLSDSTSV/2	4142.75	A02	11	sp|Q13464|ROCK1_HUMAN
4	16544	RLFDQAFGL	RLFDQAFGL/2	4136	A02	9	sp|P04792|HSPB1_HUMAN
4	16367	YLFPGIPELL	YLFPGIPELL/2	4091.75	A02	10	sp|Q8NFF5|FAD1_HUMAN
5	20321	FLNKEITSV	FLNKEITSV/2	4064.2	A02	9	sp|Q9UI10|EI2BD_HUMAN
4	16245	FVLPELPSV	FVLPELPSV/2	4061.25	A02	9	sp|P53990|IST1_HUMAN
5	20266	GLWEIENNPTV	GLWEIENNPTV/2	4053.2	A02	11	sp|P51858|HDGF_HUMAN
4	16211	ALWDKLFNL	ALWDKLFNL/2	4052.75	A02	9	sp|Q8WXH0|SYNE2_HUMAN
4	16197	SLFNGSHYL	SLFNGSHYL/2	4049.25	A02	9	sp|P54277|PMS1_HUMAN
4	16185	MLFGHPLLVSV	M[147]LFGHPLLVSV/2	4046.25	A02	11	sp|P51784|UBP11_HUMAN
4	16089	ILVDTVWAL	ILVDTVWAL/2	4022.25	A02	9	sp|O00629|IMA3_HUMAN
5	20087	SLIDIVTEI	SLIDIVTEI/2	4017.4	A02	9	sp|Q9UHH9|IP6K2_HUMAN
5	20076	FQHTGIYSV	FQHTGIYSV/2	4015.2	A02	9	sp|Q9Y5S1|TRPV2_HUMAN
5	20047	LLLPDYYLVTV	LLLPDYYLVTV/2	4009.4	A02	11	sp|Q7KZF4|SND1_HUMAN
5	19979	KVLEYVIKV	KVLEYVIKV/2	3995.8	A02	9	sp|P43355|MAGA1_HUMAN
5	19954	NMVDIIHSV	NMVDIIHSV/2	3990.8	A02	9	sp|P05166|PCCB_HUMAN
5	19932	FLIGILLREV	FLIGILLREV/2	3986.4	A02	10	sp|Q96BY6|DOC10_HUMAN
4	15945	FVLDKVPFL	FVLDKVPFL/2	3986.25	A02	9	sp|Q9NQW6|ANLN_HUMAN
5	19746	KLVELPYTV	KLVELPYTV/2	3949.2	A02	9	sp|Q9NPF4|OSGEP_HUMAN
5	19719	ILVEHISGV	ILVEHISGV/2	3943.8	A02	9	sp|Q9P2K8|E2AK4_HUMAN
5	19693	KLWEFFQVDV	KLWEFFQVDV/2	3938.6	A02	10	sp|P35573|GDE_HUMAN
5	19533	GLTEGIWQL	GLTEGIWQL/2	3906.6	A02	9	sp|Q96RL1|UIMC1_HUMAN
4	15622	ALLDRIVSV	ALLDRIVSV/2	3905.5	A02	9	sp|Q92621|NU205_HUMAN
6	23409	IMLEALERV	IMLEALERV/2	3901.5	A02	9	sp|A8MWD9|RUXGL_HUMAN;sp|P62308|RUXG_HUMAN
4	15565	SLLPYLPML	SLLPYLPM[147]L/2	3891.25	A02	9	sp|Q9Y4A5|TRRAP_HUMAN
5	19385	RLVDLDWRV	RLVDLDWRV/3	3877	A02	9	sp|Q9P000|COMD9_HUMAN
4	15305	KLIDLSQVMYL	KLIDLSQVM[147]YL/2	3826.25	A02	11	sp|Q6ZN28|MACC1_HUMAN
5	19067	KLIDLEHLL	KLIDLEHLL/2	3813.4	A02	9	sp|Q8IYW5|RN168_HUMAN
3	11344	VLWAGTPMV	VLWAGTPM[147]V/2	3781.33	A02	9	sp|O15294|OGT1_HUMAN
6	22647	LLPDYYLVTV	LLPDYYLVTV/2	3774.5	A02	10	sp|Q7KZF4|SND1_HUMAN
4	15026	KLADKLYNL	KLADKLYNL/2	3756.5	A02	9	sp|Q8N4P3|MESH1_HUMAN
4	14972	FLQEKSPAV	FLQEKSPAV/2	3743	A02	9	sp|Q14157|UBP2L_HUMAN
4	14923	FLADAKWIL	FLADAKWIL/2	3730.75	A02	9	sp|Q9ULU4|PKCB1_HUMAN
5	18483	HLINYIIFL	HLINYIIFL/2	3696.6	A02	9	sp|Q5BJD5|TM41B_HUMAN
6	22016	ALVESLEYV	ALVESLEYV/2	3669.33	A02	9	sp|Q9NU22|MDN1_HUMAN
4	14663	FLWERPTLLV	FLWERPTLLV/2	3665.75	A02	10	sp|Q6IN84|MRM1_HUMAN
5	18318	YLLDQHILI	YLLDQHILI/2	3663.6	A02	9	sp|Q92835|SHIP1_HUMAN
4	14638	FLADPSAFV	FLADPSAFV/2	3659.5	A02	9	sp|Q8NHW5|RLA0L_HUMAN
4	14608	KIIEYSVYL	KIIEYSVYL/2	3652	A02	9	sp|P51610|HCFC1_HUMAN
5	18237	SLIPIISGV	SLIPIISGV/2	3647.4	A02	9	sp|Q96K37|S35E1_HUMAN
5	18195	KLQEQIFHL	KLQEQIFHL/2	3639	A02	9	sp|Q9NQC1|JADE2_HUMAN
6	21798	KILEDVVGV	KILEDVVGV/2	3633	A02	9	sp|Q9ULW0|TPX2_HUMAN
5	18148	SLAPIIVFV	SLAPIIVFV/2	3629.6	A02	9	sp|P54284|CACB3_HUMAN
4	14514	ALMELFPKL	ALM[147]ELFPKL/2	3628.5	A02	9	sp|O75691|UTP20_HUMAN
6	21506	FLNKLVILV	FLNKLVILV/2	3584.33	A02	9	sp|Q92835|SHIP1_HUMAN
4	14306	FLFGALAEL	FLFGALAEL/2	3576.5	A02	9	sp|Q86VD1|MORC1_HUMAN
5	17649	RLTDYISKV	RLTDYISKV/2	3529.8	A02	9	sp|O75915|PRAF3_HUMAN
5	17641	RLSDAQIYV	RLSDAQIYV/2	3528.2	A02	9	sp|O14879|IFIT3_HUMAN
6	21164	ALQEKLWNV	ALQEKLWNV/2	3527.33	A02	9	sp|Q96HW7|INT4_HUMAN
6	21144	VMITKLVEV	VM[147]ITKLVEV/2	3524	A02	9	sp|Q92729|PTPRU_HUMAN
6	21094	TLSERLWGL	TLSERLWGL/2	3515.67	A02	9	sp|Q9NS69|TOM22_HUMAN
5	17554	ALSDSIHTV	ALSDSIHTV/2	3510.8	A02	9	sp|Q9UKN5|PRDM4_HUMAN
6	21013	FLLHIQQQV	FLLHIQQQV/2	3502.17	A02	9	sp|O95486|SC24A_HUMAN
6	21003	SLFSVIVRV	SLFSVIVRV/2	3500.5	A02	9	sp|Q5W0V3|F16B1_HUMAN
4	13912	KLLSKFYEL	KLLSKFYEL/2	3478	A02	9	sp|Q86UV5|UBP48_HUMAN
5	17380	LLWGNLPEI	LLWGNLPEI/2	3476	A02	9	sp|Q5TYM5|FA72A_HUMAN
5	17342	KLQDQIFNL	KLQDQIFNL/2	3468.4	A02	9	sp|O43665|RGS10_HUMAN
6	20806	FLIPAVELI	FLIPAVELI/2	3467.67	A02	9	sp|Q9NVP1|DDX18_HUMAN
6	20780	QLIDKVWQL	QLIDKVWQL/2	3463.33	A02	9	sp|Q92503|S14L1_HUMAN
6	20778	SLFRVITEV	SLFRVITEV/2	3463	A02	9	sp|Q93063|EXT2_HUMAN
6	20659	SLWQEIPVV	SLWQEIPVV/2	3443.17	A02	9	sp|Q12774|ARHG5_HUMAN
6	20647	TLLEDGTFKV	TLLEDGTFKV/2	3441.17	A02	10	sp|Q9HBL8|NMRL1_HUMAN
5	17146	FLDSTSPLL	FLDSTSPLL/2	3429.2	A02	9	sp|Q5VYK3|ECM29_HUMAN
5	17076	SLADVHIEV	SLADVHIEV/2	3415.2	A02	9	sp|O14981|BTAF1_HUMAN
5	17043	KMLDHPHIIKL	KM[147]LDHPHIIKL/3	3408.6	A02	11	sp|Q9H0K1|SIK2_HUMAN
6	20269	ALVDQLWKL	ALVDQLWKL/2	3378.17	A02	9	sp|Q6P1X5|TAF2_HUMAN
5	16886	YLTHDSPSV	YLTHDSPSV/2	3377.2	A02	9	sp|P09234|RU1C_HUMAN
6	20223	YLKDLIEEV	YLKDLIEEV/2	3370.5	A02	9	sp|P18848|ATF4_HUMAN
5	16832	HLFDAFVSV	HLFDAFVSV/2	3366.4	A02	9	sp|Q8WUY9|DEP1B_HUMAN
6	20170	FLYPFPLA	FLYPFPLA/2	3361.67	A02	8	sp|Q5BJD5|TM41B_HUMAN
5	16748	SLLDPLWTL	SLLDPLWTL/2	3349.6	A02	9	sp|Q9H3S7|PTN23_HUMAN
6	20092	FIIEKQPPQV	FIIEKQPPQV/2	3348.67	A02	10	sp|P42229|STA5A_HUMAN
5	16736	RLVPFLVFV	RLVPFLVFV/2	3347.2	A02	9	sp|O95202|LETM1_HUMAN
7	23154	TLLKKVWKV	TLLKKVWKV/2	3307.71	A02	9	sp|Q8NA72|POC5_HUMAN
6	19801	YLPYPIHQV	YLPYPIHQV/2	3300.17	A02	9	sp|P49760|CLK2_HUMAN
5	16462	YLFAVNIKL	YLFAVNIKL/2	3292.4	A02	9	sp|Q8N1G2|CMTR1_HUMAN
4	12961	YLYPDITRL	YLYPDITRL/2	3240.25	A02	9	sp|P31641|SC6A6_HUMAN
6	19436	MLIEVIEKL	M[147]LIEVIEKL/2	3239.33	A02	9	sp|O00203|AP3B1_HUMAN
5	16175	KLLKDLPEL	KLLKDLPEL/2	3235	A02	9	sp|Q53EL6|PDCD4_HUMAN
4	12872	YLIDEPSAYL	YLIDEPSAYL/2	3218	A02	10	sp|P61221|ABCE1_HUMAN
6	19283	ILVSWLPRL	ILVSWLPRL/2	3213.83	A02	9	sp|Q7Z628|ARHG8_HUMAN
7	22488	VLFQEALWHV	VLFQEALWHV/2	3212.57	A02	10	sp|P49327|FAS_HUMAN
7	22373	TMIDFPQMV	TM[147]IDFPQM[147]V/2	3196.14	A02	9	sp|Q9BVS4|RIOK2_HUMAN
6	19147	AIMDIVIKV	AIM[147]DIVIKV/2	3191.17	A02	9	sp|Q9NZJ5|E2AK3_HUMAN
6	19142	YLITSVELL	YLITSVELL/2	3190.33	A02	9	sp|O60488|ACSL4_HUMAN
7	22332	FIFSEKPVFV	FIFSEKPVFV/2	3190.29	A02	10	sp|Q92673|SORL_HUMAN
6	19082	KLWDIINVNI	KLWDIINVNI/2	3180.33	A02	10	sp|Q3SXM5|HSDL1_HUMAN
7	22098	VLFEKEVNEV	VLFEKEVNEV/2	3156.86	A02	10	sp|Q9BZQ8|NIBAN_HUMAN
6	18937	SLAQYLINV	SLAQYLINV/2	3156.17	A02	9	sp|Q15366|PCBP2_HUMAN
6	18862	LLLPDYYL	LLLPDYYL/2	3143.67	A02	8	sp|Q7KZF4|SND1_HUMAN
5	15712	SIIEYLPTL	SIIEYLPTL/2	3142.4	A02	9	sp|Q96QE3|ATAD5_HUMAN
5	15690	FLADIVQKL	FLADIVQKL/2	3138	A02	9	sp|Q9NZJ4|SACS_HUMAN
7	21943	TLWVDPYEV	TLWVDPYEV/2	3134.71	A02	9	sp|P62324|BTG1_HUMAN
6	18621	GLYGAIFRL	GLYGAIFRL/2	3103.5	A02	9	sp|O95977|S1PR4_HUMAN
6	18616	SLISTILEV	SLISTILEV/2	3102.67	A02	9	sp|Q9Y263|PLAP_HUMAN
6	18584	LLISGLPTI	LLISGLPTI/2	3097.33	A02	9	sp|Q7Z6Z7|HUWE1_HUMAN
6	18546	ILLKDILSV	ILLKDILSV/2	3091	A02	9	sp|Q13315|ATM_HUMAN
6	18546	FLHDHVDLQV	FLHDHVDLQV/2	3091	A02	10	sp|P78344|IF4G2_HUMAN
6	18421	LLSEILHLL	LLSEILHLL/2	3070.17	A02	9	sp|O43432|IF4G3_HUMAN
6	18419	FLFNKVVNL	FLFNKVVNL/2	3069.83	A02	9	sp|P62699|YPEL5_HUMAN
7	21462	SLFKIWLV	SLFKIWLV/2	3066	A02	8	sp|Q6PID8|KLD10_HUMAN
6	18380	SMADIPLGFGV	SM[147]ADIPLGFGV/2	3063.33	A02	11	sp|Q9Y221|NIP7_HUMAN
3	9167	ILADLLPSL	ILADLLPSL/2	3055.67	A02	9	sp|Q6IAN0|DRS7B_HUMAN
6	18226	MLFGHPLLV	M[147]LFGHPLLV/2	3037.67	A02	9	sp|P51784|UBP11_HUMAN
7	21207	SLVSSLYKV	SLVSSLYKV/2	3029.57	A02	9	sp|Q9BYI3|HYCCI_HUMAN
6	18069	SLLSSVFKL	SLLSSVFKL/2	3011.5	A02	9	sp|Q7Z695|ADCK2_HUMAN
5	15036	SLASVIFLL	SLASVIFLL/2	3007.2	A02	9	sp|Q9UBM7|DHCR7_HUMAN
4	12023	KLWDPNEFAV	KLWDPNEFAV/2	3005.75	A02	10	sp|Q14156|EFR3A_HUMAN
4	12018	RLYEITIEV	RLYEITIEV/2	3004.5	A02	9	sp|Q8TEM1|PO210_HUMAN
4	12004	YIIDVSQSV	YIIDVSQSV/2	3001	A02	9	sp|Q9BRS2|RIOK1_HUMAN
6	17996	FLISRLIKL	FLISRLIKL/2	2999.33	A02	9	sp|P55786|PSA_HUMAN
6	17966	GLIDHQTYL	GLIDHQTYL/2	2994.33	A02	9	sp|Q15149|PLEC_HUMAN
4	11959	ALLDKLYAL	ALLDKLYAL/2	2989.75	A02	9	sp|Q9NV31|IMP3_HUMAN
6	17917	TLDDLIAAV	TLDDLIAAV/2	2986.17	A02	9	sp|Q8IWZ3|ANKH1_HUMAN
8	23835	FLPEAFDFI	FLPEAFDFI/2	2979.38	A02	9	sp|Q86X76|NIT1_HUMAN
7	20819	TLFDYEVRL	TLFDYEVRL/2	2974.14	A02	9	sp|Q96T88|UHRF1_HUMAN
7	20778	ILTTLIHLV	ILTTLIHLV/2	2968.29	A02	9	sp|Q9UI26|IPO11_HUMAN
7	20671	KLDQVIIHV	KLDQVIIHV/2	2953	A02	9	sp|Q9BXD5|NPL_HUMAN
7	20561	YLITLLEHL	YLITLLEHL/2	2937.29	A02	9	sp|O43683|BUB1_HUMAN
6	17573	LLFDLEIAL	LLFDLEIAL/2	2928.83	A02	9	sp|P03897|NU3M_HUMAN
6	17553	FLLPILSQI	FLLPILSQI/2	2925.5	A02	9	sp|O00571|DDX3X_HUMAN
6	17439	GLYEGLTWL	GLYEGLTWL/2	2906.5	A02	9	sp|P62330|ARF6_HUMAN
4	11582	YMNHIMVSV	YM[147]NHIM[147]VSV/2	2895.5	A02	9	sp|P41212|ETV6_HUMAN
6	17340	KMADIEYRL	KM[147]ADIEYRL/2	2890	A02	9	sp|P40937|RFC5_HUMAN
6	17333	VLIDDLTTL	VLIDDLTTL/2	2888.83	A02	9	sp|Q9Y2Z2|MTO1_HUMAN
7	20001	FLFDIPKILDL	FLFDIPKILDL/2	2857.29	A02	11	sp|Q9H1I8|ASCC2_HUMAN
6	17132	YLIPDIDLKL	YLIPDIDLKL/2	2855.33	A02	10	sp|Q92922|SMRC1_HUMAN
7	19974	ILAELLLRV	ILAELLLRV/2	2853.43	A02	9	sp|P50613|CDK7_HUMAN
5	14167	KLYAGAILEV	KLYAGAILEV/2	2833.4	A02	10	sp|O60613|SEP15_HUMAN
5	14167	RLDDSLLYL	RLDDSLLYL/2	2833.4	A02	9	sp|P49406|RM19_HUMAN
7	19829	SLFSHLLEI	SLFSHLLEI/2	2832.71	A02	9	sp|Q6ZS81|WDFY4_HUMAN
6	16996	SLLGHLMIV	SLLGHLM[147]IV/2	2832.67	A02	9	sp|P49773|HINT1_HUMAN
6	16976	AMLPSITNV	AM[147]LPSITNV/2	2829.33	A02	9	sp|Q9Y4A5|TRRAP_HUMAN
5	14146	VLLSHLSYL	VLLSHLSYL/2	2829.2	A02	9	sp|Q01543|FLI1_HUMAN
6	16970	FLSSVIQNL	FLSSVIQNL/2	2828.33	A02	9	sp|Q99460|PSMD1_HUMAN
4	11279	KLMDKVVRL	KLM[147]DKVVRL/3	2819.75	A02	9	sp|Q13191|CBLB_HUMAN
6	16899	KLIQNVFEI	KLIQNVFEI/2	2816.5	A02	9	sp|O00471|EXOC5_HUMAN
6	16870	LLLPLNLEV	LLLPLNLEV/2	2811.67	A02	9	sp|Q96RL7|VP13A_HUMAN
7	19655	KLQEQIHRV	KLQEQIHRV/3	2807.86	A02	9	sp|O60293|ZC3H1_HUMAN
8	22405	LLDEEISRV	LLDEEISRV/2	2800.62	A02	9	sp|Q96PU8|QKI_HUMAN
5	13973	KLYEAVPQL	KLYEAVPQL/2	2794.6	A02	9	sp|O00311|CDC7_HUMAN
6	16765	YLDLFGDPSV	YLDLFGDPSV/2	2794.17	A02	10	sp|P14324|FPPS_HUMAN
3	8372	FIWENIHTL	FIWENIHTL/2	2790.67	A02	9	sp|Q03001|DYST_HUMAN
7	19529	SLIEVVIGL	SLIEVVIGL/2	2789.86	A02	9	sp|Q9UGH3|S23A2_HUMAN
4	11151	KIADFGWSV	KIADFGWSV/2	2787.75	A02	9	sp|Q9UQB9|AURKC_HUMAN
8	22201	FLFEPVVKA	FLFEPVVKA/2	2775.12	A02	9	sp|Q6IN85|P4R3A_HUMAN
6	16640	LLAEQGYEV	LLAEQGYEV/2	2773.33	A02	9	sp|Q9UBV2|SE1L1_HUMAN
7	19412	KLFDTQQFL	KLFDTQQFL/2	2773.14	A02	9	sp|Q15306|IRF4_HUMAN
7	19405	LLLPILVTV	LLLPILVTV/2	2772.14	A02	9	sp|O94822|LTN1_HUMAN
7	19392	SLIDFLRVV	SLIDFLRVV/2	2770.29	A02	9	sp|P43378|PTN9_HUMAN
7	19346	ALVESLITV	ALVESLITV/2	2763.71	A02	9	sp|Q8N655|CJ012_HUMAN
8	22078	SLLQTLYKV	SLLQTLYKV/2	2759.75	A02	9	sp|P46060|RAGP1_HUMAN
7	19251	KLWEFPINNEA	KLWEFPINNEA/2	2750.14	A02	11	sp|Q92665|RT31_HUMAN
7	19232	SLWSIISKV	SLWSIISKV/2	2747.43	A02	9	sp|Q96GC9|VMP1_HUMAN
5	13697	KLLPQLTYL	KLLPQLTYL/2	2739.4	A02	9	sp|P39687|AN32A_HUMAN
7	19079	VLYSVMTLV	VLYSVM[147]TLV/2	2725.57	A02	9	sp|Q9UNL2|SSRG_HUMAN
8	21691	HLLEEPIYL	HLLEEPIYL/2	2711.38	A02	9	sp|Q9BUB4|ADAT1_HUMAN
8	21593	SLVEIILHV	SLVEIILHV/2	2699.12	A02	9	sp|Q9UNM6|PSD13_HUMAN
4	10770	SLAELVHAV	SLAELVHAV/2	2692.5	A02	9	sp|Q9Y6P5|SESN1_HUMAN
7	18769	GLWSGPLPRV	GLWSGPLPRV/2	2681.29	A02	10	sp|Q99575|POP1_HUMAN
5	13402	YLAPFLRNV	YLAPFLRNV/2	2680.4	A02	9	sp|A5YKK6|CNOT1_HUMAN
7	18664	KLIAKIPTI	KLIAKIPTI/2	2666.29	A02	9	sp|Q92753|RORB_HUMAN
7	18650	ALLNILSEV	ALLNILSEV/2	2664.29	A02	9	sp|A0AVT1|UBA6_HUMAN
7	18643	KVLEILHRV	KVLEILHRV/3	2663.29	A02	9	sp|Q5GLZ8|HERC4_HUMAN
8	21296	FLIEEQKIVV	FLIEEQKIVV/2	2662	A02	10	sp|P49207|RL34_HUMAN
6	15901	VLAPLVIYL	VLAPLVIYL/2	2650.17	A02	9	sp|Q9H461|FZD8_HUMAN
7	18545	SVIEQIVYV	SVIEQIVYV/2	2649.29	A02	9	sp|Q00653|NFKB2_HUMAN
6	15802	VLLSTIHEL	VLLSTIHEL/2	2633.67	A02	9	sp|Q6I9Y2|THOC7_HUMAN
7	18417	SMVDVVMLL	SM[147]VDVVMLL/2	2631	A02	9	sp|P46379|BAG6_HUMAN
7	18372	GILPMVPEV	GILPM[147]VPEV/2	2624.57	A02	9	sp|O95793|STAU1_HUMAN
6	15684	KLMDLDVEQL	KLM[147]DLDVEQL/2	2614	A02	10	sp|P12004|PCNA_HUMAN
5	13058	RLLDGAFKL	RLLDGAFKL/2	2611.6	A02	9	sp|Q7Z460|CLAP1_HUMAN
8	20868	GLMDDVDFKA	GLM[147]DDVDFKA/2	2608.5	A02	10	sp|Q9Y4L1|HYOU1_HUMAN
7	18160	ALLGGLVNV	ALLGGLVNV/2	2594.29	A02	9	sp|Q8N4S7|PAQR4_HUMAN
8	20748	GLIEWLENTV	GLIEWLENTV/2	2593.5	A02	10	sp|P78527|PRKDC_HUMAN
8	20723	GMYIFLHTV	GM[147]YIFLHTV/2	2590.38	A02	9	sp|Q8N138|ORML3_HUMAN
8	20623	KLYDIDVAKV	KLYDIDVAKV/2	2577.88	A02	10	sp|P62750|RL23A_HUMAN
8	20570	FLFLDRTYV	FLFLDRTYV/2	2571.25	A02	9	sp|Q13619|CUL4A_HUMAN
6	15404	KLWDIINVNIAA	KLWDIINVNIAA/2	2567.33	A02	12	sp|Q3SXM5|HSDL1_HUMAN
8	20536	QLIEKNWLL	QLIEKNWLL/2	2567	A02	9	sp|Q9NS87|KIF15_HUMAN
4	10253	YLGPHIASV	YLGPHIASV/2	2563.25	A02	9	sp|Q96GC9|VMP1_HUMAN
5	12731	FLLPAGWIL	FLLPAGWIL/2	2546.2	A02	9	sp|P10176|COX8A_HUMAN
2	5091	YMMPVNSEV	YM[147]M[147]PVNSEV/2	2545.5	A02	9	sp|Q9BZD4|NUF2_HUMAN
7	17721	ALWDIETGQQTV	ALWDIETGQQTV/2	2531.57	A02	12	sp|P62879|GBB2_HUMAN
7	17696	YLISQVEGHQV	YLISQVEGHQV/2	2528	A02	11	sp|Q9Y3C4|TPRKB_HUMAN
6	15165	RLFSSIVTV	RLFSSIVTV/2	2527.5	A02	9	sp|Q9NX74|DUS2L_HUMAN
7	17651	KLFDAPLSI	KLFDAPLSI/2	2521.57	A02	9	sp|A8K0Z3|WASH1_HUMAN
8	20129	VLVSELIPWAV	VLVSELIPWAV/2	2516.12	A02	11	sp|Q9Y3A0|COQ4_HUMAN
9	22468	QMISRIEYV	QMISRIEYV/2	2496.44	A02	9	sp|Q8N752|KC1AL_HUMAN
7	17404	KLHDSVVMV	KLHDSVVM[147]V/2	2486.29	A02	9	sp|Q9GZN8|CT027_HUMAN
6	14915	VLFHNLPSL	VLFHNLPSL/2	2485.83	A02	9	sp|P19397|CD53_HUMAN
8	19868	LLLPGLETV	LLLPGLETV/2	2483.5	A02	9	sp|Q5UIP0|RIF1_HUMAN
8	19867	LLGSVVHEV	LLGSVVHEV/2	2483.38	A02	9	sp|Q9C0B7|TNG6_HUMAN
7	17354	KLNPQQFEV	KLNPQQFEV/2	2479.14	A02	9	sp|P46977|STT3A_HUMAN
6	14865	FIADLVVGL	FIADLVVGL/2	2477.5	A02	9	sp|P06733|ENOA_HUMAN
7	17323	VLMKALEYL	VLM[147]KALEYL/2	2474.71	A02	9	sp|Q14008|CKAP5_HUMAN
4	9895	YLADIFTKL	YLADIFTKL/2	2473.75	A02	9	sp|Q49AG3|ZBED5_HUMAN
7	17314	GLYPGLIWL	GLYPGLIWL/2	2473.43	A02	9	sp|O14896|IRF6_HUMAN
7	17296	ALATLIHQV	ALATLIHQV/2	2470.86	A02	9	sp|Q9UBW8|CSN7A_HUMAN
5	12252	KLLSFTHKL	KLLSFTHKL/3	2450.4	A02	9	sp|A3KMH1|VWA8_HUMAN
5	12231	FLWERPTLL	FLWERPTLL/2	2446.2	A02	9	sp|Q6IN84|MRM1_HUMAN
6	14669	GMAERIPEL	GM[147]AERIPEL/2	2444.83	A02	9	sp|O95573|ACSL3_HUMAN
3	7331	YLSPKLWAL	YLSPKLWAL/2	2443.67	A02	9	sp|Q9BRS8|LARP6_HUMAN
6	14647	KLSEVLQAV	KLSEVLQAV/2	2441.17	A02	9	sp|Q93009|UBP7_HUMAN
8	19489	HLGDFLVFL	HLGDFLVFL/2	2436.12	A02	9	sp|Q15751|HERC1_HUMAN
8	19481	QLAQFVHEV	QLAQFVHEV/2	2435.12	A02	9	sp|A8MPP1|D11L8_HUMAN
9	21856	ILFNRVLGV	ILFNRVLGV/2	2428.44	A02	9	sp|P47712|PA24A_HUMAN
8	19256	KLIQESPTV	KLIQESPTV/2	2407	A02	9	sp|Q86XR8|CEP57_HUMAN
7	16795	VLAPLIALV	VLAPLIALV/2	2399.29	A02	9	sp|Q9Y320|TMX2_HUMAN
4	9590	RLLENMTEV	RLLENM[147]TEV/2	2397.5	A02	9	sp|Q6P996|PDXD1_HUMAN
7	16597	FLQDIPDGLFL	FLQDIPDGLFL/2	2371	A02	11	sp|Q99755|PI51A_HUMAN
9	21287	QLLKFIPGL	QLLKFIPGL/2	2365.22	A02	9	sp|O60759|CYTIP_HUMAN
6	14181	FLLPVINEM	FLLPVINEM[147]/2	2363.5	A02	9	sp|Q9Y605|MOFA1_HUMAN
7	16477	RLFSKGFLV	RLFSKGFLV/2	2353.86	A02	9	sp|P57678|GEMI4_HUMAN
8	18767	KLFGMIITI	KLFGM[147]IITI/2	2345.88	A02	9	sp|P61619|S61A1_HUMAN
5	11716	AIMGFIGFFV	AIM[147]GFIGFFV/2	2343.2	A02	10	sp|P60059|SC61G_HUMAN
5	11688	HLYDYTVKL	HLYDYTVKL/2	2337.6	A02	9	sp|O00291|HIP1_HUMAN
9	21037	GLLTGILETV	GLLTGILETV/2	2337.44	A02	10	sp|Q96QU8|XPO6_HUMAN
8	18650	SLQEKLWAI	SLQEKLWAI/2	2331.25	A02	9	sp|Q9Y6I8|PXMP4_HUMAN
10	23290	YLINEIDRI	YLINEIDRI/2	2329	A02	9	sp|Q03001|DYST_HUMAN
4	9300	YLIPFTGIVGL	YLIPFTGIVGL/2	2325	A02	11	sp|Q9H6Y7|RN167_HUMAN
6	13944	ALMPVLNQV	ALMPVLNQV/2	2324	A02	9	sp|Q5RKV6|EXOS6_HUMAN
7	16171	SLLDRFLATV	SLLDRFLATV/2	2310.14	A02	10	sp|Q14094|CCNI_HUMAN
8	18455	ALANGIEEV	ALANGIEEV/2	2306.88	A02	9	sp|O95236|APOL3_HUMAN
5	11400	YLTDLQVSL	YLTDLQVSL/2	2280	A02	9	sp|Q9Y4A8|NF2L3_HUMAN
7	15946	VLDEGSASV	VLDEGSASV/2	2278	A02	9	sp|Q05923|DUS2_HUMAN
9	20467	GLAELYVMV	GLAELYVM[147]V/2	2274.11	A02	9	sp|Q8N511|TM199_HUMAN
8	18160	LLANIVPIAMLV	LLANIVPIAM[147]LV/2	2270	A02	12	sp|P03901|NU4LM_HUMAN
8	18160	FLKDLVASV	FLKDLVASV/2	2270	A02	9	sp|Q14919|NC2A_HUMAN
8	18116	ALLPIFFGA	ALLPIFFGA/2	2264.5	A02	9	sp|Q8TCT9|HM13_HUMAN
7	15821	KLADQYPHL	KLADQYPHL/3	2260.14	A02	9	sp|P56693|SOX10_HUMAN
10	22487	FQIGPVAGV	FQIGPVAGV/2	2248.7	A02	9	sp|Q14246|EMR1_HUMAN
8	17958	GLVPFLVSV	GLVPFLVSV/2	2244.75	A02	9	sp|P52292|IMA1_HUMAN
6	13444	RLFEVPHEL	RLFEVPHEL/2	2240.67	A02	9	sp|Q9Y3M8|STA13_HUMAN
8	17896	KLWEMDNMLI	KLWEM[147]DNM[147]LI/2	2237	A02	10	sp|Q9Y605|MOFA1_HUMAN
7	15642	ALADKELLPSV	ALADKELLPSV/2	2234.57	A02	11	sp|Q9BRQ8|AIFM2_HUMAN
6	13376	RMLPHAPGV	RMLPHAPGV/2	2229.33	A02	9	sp|Q13547|HDAC1_HUMAN
9	20050	GLLGNVAEV	GLLGNVAEV/2	2227.78	A02	9	sp|Q7Z7L7|ZER1_HUMAN
9	19917	LLIKQVVEV	LLIKQVVEV/2	2213	A02	9	sp|Q8NDN9|RCBT1_HUMAN
9	19896	FLNGLEILL	FLNGLEILL/2	2210.67	A02	9	sp|Q9NU22|MDN1_HUMAN
8	17671	FIWPMLIHI	FIWPM[147]LIHI/2	2208.88	A02	9	sp|Q86XP3|DDX42_HUMAN
6	13214	YLTAEILEL	YLTAEILEL/2	2202.33	A02	9	sp|Q96QV6|H2A1A_HUMAN
8	17614	ALSEKIVSV	ALSEKIVSV/2	2201.75	A02	9	sp|Q567U6|CCD93_HUMAN
5	11008	ALMDLLLRL	ALMDLLLRL/2	2201.6	A02	9	sp|O75170|PP6R2_HUMAN
8	17608	FLGENISNFL	FLGENISNFL/2	2201	A02	10	sp|O14791|APOL1_HUMAN
9	19713	GLIDFAIQL	GLIDFAIQL/2	2190.33	A02	9	sp|Q86YW9|MD12L_HUMAN
7	15181	ALLDSAHLL	ALLDSAHLL/2	2168.71	A02	9	sp|O14617|AP3D1_HUMAN
8	17218	LLAPFCPHL	LLAPFCPHL/2	2152.25	A02	9	sp|Q9P2J5|SYLC_HUMAN
9	19370	FLPPLPTSV	FLPPLPTSV/2	2152.22	A02	9	sp|Q13057|COASY_HUMAN
10	21498	FLFNLPLNI	FLFNLPLNI/2	2149.8	A02	9	sp|Q96KP1|EXOC2_HUMAN
9	19325	ILLDIHIFM	ILLDIHIFM[147]/2	2147.22	A02	9	sp|Q14008|CKAP5_HUMAN
8	17088	YLNHLIQGL	YLNHLIQGL/2	2136	A02	9	sp|Q9Y3M8|STA13_HUMAN
9	19149	ILLDDNMQIRL	ILLDDNM[147]QIRL/2	2127.67	A02	11	sp|P15735|PHKG2_HUMAN
10	21254	SLFSSPPEI	SLFSSPPEI/2	2125.4	A02	9	sp|Q6ZWJ1|STXB4_HUMAN
10	21230	RLPEAIEEV	RLPEAIEEV/2	2123	A02	9	sp|Q9UBQ7|GRHPR_HUMAN
8	16942	KLQELNYNL	KLQELNYNL/2	2117.75	A02	9	sp|P42224|STAT1_HUMAN
9	19037	VLLDAPIQL	VLLDAPIQL/2	2115.22	A02	9	sp|Q9NUQ8|ABCF3_HUMAN
10	20994	ALMDEVVKA	ALM[147]DEVVKA/2	2099.4	A02	9	sp|P00558|PGK1_HUMAN
9	18863	RLLHEMILV	RLLHEM[147]ILV/2	2095.89	A02	9	sp|P53618|COPB_HUMAN
5	10479	WLAEKLPTL	WLAEKLPTL/2	2095.8	A02	9	sp|Q14008|CKAP5_HUMAN
8	16760	KIYEGQVEV	KIYEGQVEV/2	2095	A02	9	sp|P46777|RL5_HUMAN
10	20828	NLLKLIAEV	NLLKLIAEV/2	2082.8	A02	9	sp|Q9HBM1|SPC25_HUMAN
6	12377	FLSELTQQL	FLSELTQQL/2	2062.83	A02	9	sp|P14174|MIF_HUMAN
9	18322	KLFEDELTL	KLFEDELTL/2	2035.78	A02	9	sp|O95202|LETM1_HUMAN
10	20346	LLQDIILQV	LLQDIILQV/2	2034.6	A02	9	sp|Q9UKT7|FBXL3_HUMAN
6	12188	KMWEEAISL	KM[147]WEEAISL/2	2031.33	A02	9	sp|Q92608|DOCK2_HUMAN
9	18276	HLLDIYIQL	HLLDIYIQL/2	2030.67	A02	9	sp|Q9NU22|MDN1_HUMAN
2	4059	VLMDRLPSL	VLM[147]DRLPSL/2	2029.5	A02	9	sp|O60287|NPA1P_HUMAN
9	18263	VLLQIVHFL	VLLQIVHFL/2	2029.22	A02	9	sp|Q9NP92|RT30_HUMAN
10	20186	ALTDVILCV	ALTDVILCV/2	2018.6	A02	9	sp|Q8WZ60|KLHL6_HUMAN
11	22129	GLLSIFTKV	GLLSIFTKV/2	2011.73	A02	9	sp|Q6YHU6|THADA_HUMAN
11	22122	ALNELLQHV	ALNELLQHV/2	2011.09	A02	9	sp|Q9Y490|TLN1_HUMAN
9	18059	GLYSGVTTV	GLYSGVTTV/2	2006.56	A02	9	sp|P23921|RIR1_HUMAN
10	20065	GLYSRQLYV	GLYSRQLYV/2	2006.5	A02	9	sp|P22314|UBA1_HUMAN
9	18048	SLHDAIMIV	SLHDAIM[147]IV/2	2005.33	A02	9	sp|Q99832|TCPH_HUMAN
10	20053	KLIPFLEKL	KLIPFLEKL/2	2005.3	A02	9	sp|Q05D32|CTSL2_HUMAN
11	21936	VMYGKVYRI	VMYGKVYRI/3	1994.18	A02	9	sp|P52434|RPAB3_HUMAN
6	11937	KLIPQLPTL	KLIPQLPTL/2	1989.5	A02	9	sp|Q9HB90|RRAGC_HUMAN
7	13910	ALMDQVHHM	ALM[147]DQVHHM[147]/2	1987.14	A02	9	sp|Q96BU1|S1PBP_HUMAN
11	21797	ALLGILQHV	ALLGILQHV/2	1981.55	A02	9	sp|Q8IVD9|NUDC3_HUMAN
11	21679	SLLKFLAKV	SLLKFLAKV/2	1970.82	A02	9	sp|P43363|MAGAA_HUMAN
11	21670	IMFQKPVEV	IM[147]FQKPVEV/2	1970	A02	9	sp|Q9Y305|ACOT9_HUMAN
8	15752	KIWDPVHRV	KIWDPVHRV/3	1969	A02	9	sp|P29144|TPP2_HUMAN
8	15709	VLADVSYLM	VLADVSYLM[147]/2	1963.62	A02	9	sp|P25098|ARBK1_HUMAN
9	17668	ALLNLLPML	ALLNLLPM[147]L/2	1963.11	A02	9	sp|O95476|CNEP1_HUMAN
9	17652	LLQDKQFEL	LLQDKQFEL/2	1961.33	A02	9	sp|Q96JC1|VPS39_HUMAN
9	17652	SLITRLLEV	SLITRLLEV/2	1961.33	A02	9	sp|P62140|PP1B_HUMAN
9	17634	KMVDGVGVCTV	KM[147]VDGVGVCTV/2	1959.33	A02	11	sp|Q5T4S7|UBR4_HUMAN
8	15669	KLIDKLDSL	KLIDKLDSL/2	1958.62	A02	9	sp|Q8N1I0|DOCK4_HUMAN
8	15650	GLLPDVPSL	GLLPDVPSL/2	1956.25	A02	9	sp|Q96N66|MBOA7_HUMAN
9	17561	RLAHYIDRV	RLAHYIDRV/2	1951.22	A02	9	sp|Q03252|LMNB2_HUMAN
7	13641	FLDPDIGGVAV	FLDPDIGGVAV/2	1948.71	A02	11	sp|Q6N021|TET2_HUMAN
8	15589	KLIDGQVIQL	KLIDGQVIQL/2	1948.62	A02	10	sp|P52747|ZN143_HUMAN
9	17500	ALADGVQKV	ALADGVQKV/2	1944.44	A02	9	sp|O14791|APOL1_HUMAN
11	21346	VLFGLLREV	VLFGLLREV/2	1940.55	A02	9	sp|Q92620|PRP16_HUMAN
7	13569	FLLDPYKYMTL	FLLDPYKYM[147]TL/2	1938.43	A02	11	sp|Q9UIG0|BAZ1B_HUMAN
11	21286	TLLHFLVEI	TLLHFLVEI/2	1935.09	A02	9	sp|Q9NSV4|DIAP3_HUMAN
12	23200	VMFKEPVEV	VM[147]FKEPVEV/2	1933.33	A02	9	sp|Q9BX70|BTBD2_HUMAN
10	19153	FLDNLHINL	FLDNLHINL/2	1915.3	A02	9	sp|Q9NYU1|UGGG2_HUMAN
10	19152	ALVDHLNVGV	ALVDHLNVGV/2	1915.2	A02	10	sp|P78537|BL1S1_HUMAN
10	19142	ILDDSHLLV	ILDDSHLLV/2	1914.2	A02	9	sp|O60306|AQR_HUMAN
10	19124	KILQELPSV	KILQELPSV/2	1912.4	A02	9	sp|Q96ST2|IWS1_HUMAN
11	21014	KLIEELETL	KLIEELETL/2	1910.36	A02	9	sp|Q03060|CREM_HUMAN
10	19083	VLAHTILGV	VLAHTILGV/2	1908.3	A02	9	sp|Q9NUQ7|UFSP2_HUMAN
11	20901	KLDQDLNEV	KLDQDLNEV/2	1900.09	A02	9	sp|Q9UQE7|SMC3_HUMAN
5	9500	FLLQDTVEL	FLLQDTVEL/2	1900	A02	9	sp|P78344|IF4G2_HUMAN
11	20847	LLDRFLATV	LLDRFLATV/2	1895.18	A02	9	sp|Q14094|CCNI_HUMAN
6	11350	FMLPDPQNISL	FM[147]LPDPQNISL/2	1891.67	A02	11	sp|Q8WW01|SEN15_HUMAN
10	18882	GLIDRQVTV	GLIDRQVTV/2	1888.2	A02	9	sp|Q9UPN3|MACF1_HUMAN
8	15101	SLLEPFVYL	SLLEPFVYL/2	1887.62	A02	9	sp|Q9NYR9|KBRS2_HUMAN
11	20747	SLVEQLTMV	SLVEQLTM[147]V/2	1886.09	A02	9	sp|O75448|MED24_HUMAN
11	20732	FLFGEEPSKL	FLFGEEPSKL/2	1884.73	A02	10	sp|Q86XL3|ANKL2_HUMAN
8	15052	VLWPLPAYL	VLWPLPAYL/2	1881.5	A02	9	sp|Q9P2X0|DPM3_HUMAN
8	15022	ALLSAAFLL	ALLSAAFLL/2	1877.75	A02	9	sp|Q9Y320|TMX2_HUMAN
8	15007	ALIEKLVEL	ALIEKLVEL/2	1875.88	A02	9	sp|Q14181|DPOA2_HUMAN
9	16866	TLIAAILYL	TLIAAILYL/2	1874	A02	9	sp|Q04941|PLP2_HUMAN
11	20578	VMDSKIVQV	VM[147]DSKIVQV/2	1870.73	A02	9	sp|P52294|IMA5_HUMAN
10	18691	GLIEKNIEL	GLIEKNIEL/2	1869.1	A02	9	sp|P26358|DNMT1_HUMAN
11	20522	KQISQAYEV	KQISQAYEV/2	1865.64	A02	9	sp|P31689|DNJA1_HUMAN
9	16786	QLWHFILEL	QLWHFILEL/2	1865.11	A02	9	sp|P50548|ERF_HUMAN
12	22360	GLMDTVKKV	GLM[147]DTVKKV/2	1863.33	A02	9	sp|Q9Y692|GMEB1_HUMAN
10	18602	KLWEMDNMLIQI	KLWEM[147]DNM[147]LIQI/2	1860.2	A02	12	sp|Q9Y605|MOFA1_HUMAN
9	16616	FLDPRPLTV	FLDPRPLTV/2	1846.22	A02	9	sp|Q16678|CP1B1_HUMAN
11	20268	YLEPYLKEV	YLEPYLKEV/2	1842.55	A02	9	sp|P14927|QCR7_HUMAN
9	16518	KLLPGDLTQV	KLLPGDLTQV/2	1835.33	A02	10	sp|Q9H7D0|DOCK5_HUMAN
13	23661	LLNEILEQV	LLNEILEQV/2	1820.08	A02	9	sp|Q9BPX3|CND3_HUMAN
10	18115	TLAELLVLL	TLAELLVLL/2	1811.5	A02	9	sp|Q15363|TMED2_HUMAN
7	12668	SLASLLVSV	SLASLLVSV/2	1809.71	A02	9	sp|Q15024|EXOS7_HUMAN
9	16263	RLIEESVTV	RLIEESVTV/2	1807	A02	9	sp|Q12769|NU160_HUMAN
4	7208	RLAQHITYV	RLAQHITYV/2	1802	A02	9	sp|P33993|MCM7_HUMAN
10	18011	VLLSIPFVSV	VLLSIPFVSV/2	1801.1	A02	10	sp|Q8N138|ORML3_HUMAN
11	19803	YQYPVIIHL	YQYPVIIHL/2	1800.27	A02	9	sp|Q9BW60|ELOV1_HUMAN
4	7192	FLLEGIRSL	FLLEGIRSL/2	1798	A02	9	sp|P55160|NCKPL_HUMAN
10	17974	LLLPISPFM	LLLPISPFM[147]/2	1797.4	A02	9	sp|P03891|NU2M_HUMAN
10	17923	KLIFSVEAV	KLIFSVEAV/2	1792.3	A02	9	sp|Q86V21|AACS_HUMAN
9	16086	KLLGELHTL	KLLGELHTL/2	1787.33	A02	9	sp|Q15154|PCM1_HUMAN
10	17756	VLIKNLLISV	VLIKNLLISV/2	1775.6	A02	10	sp|Q03001|DYST_HUMAN
12	21297	ILFSEDSTKLFV	ILFSEDSTKLFV/2	1774.75	A02	12	sp|Q969X6|CIR1A_HUMAN
11	19507	VLSDIIQNL	VLSDIIQNL/2	1773.36	A02	9	sp|P55160|NCKPL_HUMAN
8	14184	ALLEKLTEL	ALLEKLTEL/2	1773	A02	9	sp|O75165|DJC13_HUMAN
12	21225	FLYSDEVQI	FLYSDEVQI/2	1768.75	A02	9	sp|Q9H0C5|BTBD1_HUMAN
11	19449	ILYGKIIHL	ILYGKIIHL/2	1768.09	A02	9	sp|P0CG13|CTF8_HUMAN
11	19311	ALFEQKGPVYV	ALFEQKGPVYV/2	1755.55	A02	11	sp|P54709|AT1B3_HUMAN
10	17537	GVAESIHLWEV	GVAESIHLWEV/2	1753.7	A02	11	sp|Q9BV38|WDR18_HUMAN
11	19272	YLSVKIWDL	YLSVKIWDL/2	1752	A02	9	sp|P63151|2ABA_HUMAN
12	20999	VLIDYQRNV	VLIDYQRNV/2	1749.92	A02	9	sp|O14980|XPO1_HUMAN
13	22658	GLSVIIPHV	GLSVIIPHV/2	1742.92	A02	9	sp|Q15048|LRC14_HUMAN
11	19167	KLFDLDEKLML	KLFDLDEKLM[147]L/3	1742.45	A02	11	sp|Q96ER3|SAAL1_HUMAN
10	17404	SMAKAITGV	SM[147]AKAITGV/2	1740.4	A02	9	sp|Q9UHD2|TBK1_HUMAN
7	12162	KIWDVSVNSV	KIWDVSVNSV/2	1737.43	A02	10	sp|O75083|WDR1_HUMAN
8	13889	LLWPGAALLV	LLWPGAALLV/2	1736.12	A02	10	sp|Q9GZY6|NTAL_HUMAN
11	19054	SLLQALNEV	SLLQALNEV/2	1732.18	A02	9	sp|Q14204|DYHC1_HUMAN
13	22489	VLIGEFLEKV	VLIGEFLEKV/2	1729.92	A02	10	sp|O43148|MCES_HUMAN
9	15552	ALASVAYQV	ALASVAYQV/2	1728	A02	9	sp|Q9P2A4|ABI3_HUMAN
13	22377	NLLTHIENV	NLLTHIENV/2	1721.31	A02	9	sp|A8MW92|P20L1_HUMAN
4	6885	SLWPMTFGL	SLWPM[147]TFGL/2	1721.25	A02	9	sp|O75251|NDUS7_HUMAN
12	20649	QLLEKVIEL	QLLEKVIEL/2	1720.75	A02	9	sp|Q9NTX5|ECHD1_HUMAN
13	22237	TLLRLLYEA	TLLRLLYEA/2	1710.54	A02	9	sp|Q7L2H7|EIF3M_HUMAN
12	20512	ALSELLQQV	ALSELLQQV/2	1709.33	A02	9	sp|Q14146|URB2_HUMAN
12	20488	ILDQKINEV	ILDQKINEV/2	1707.33	A02	9	sp|P11926|DCOR_HUMAN
8	13616	SLAPLFFKL	SLAPLFFKL/2	1702	A02	9	sp|O14617|AP3D1_HUMAN
11	18676	ILLRDLPTL	ILLRDLPTL/2	1697.82	A02	9	sp|Q3ZCQ3|F174B_HUMAN
7	11869	SLLPAIVEL	SLLPAIVEL/2	1695.57	A02	9	sp|P30153|2AAA_HUMAN
10	16935	ALLDNNIGL	ALLDNNIGL/2	1693.5	A02	9	sp|O75153|CLU_HUMAN
11	18560	GLADNTVIAKV	GLADNTVIAKV/2	1687.27	A02	11	sp|P26639|SYTC_HUMAN
6	10095	KLLQFYPSL	KLLQFYPSL/2	1682.5	A02	9	sp|Q9GZY6|NTAL_HUMAN
11	18461	TLLHFLAEL	TLLHFLAEL/2	1678.27	A02	9	sp|O60610|DIAP1_HUMAN
9	15085	LLIERILLL	LLIERILLL/2	1676.11	A02	9	sp|Q9UNS1|TIM_HUMAN
11	18353	FLSTLHEVYL	FLSTLHEVYL/2	1668.45	A02	10	sp|Q9NPI6|DCP1A_HUMAN
10	16672	GLFDTAISL	GLFDTAISL/2	1667.2	A02	9	sp|Q12769|NU160_HUMAN
11	18267	TLLLHTWLL	TLLLHTWLL/2	1660.64	A02	9	sp|Q92608|DOCK2_HUMAN
10	16596	SLLGGDVVSV	SLLGGDVVSV/2	1659.6	A02	10	sp|Q99576|T22D3_HUMAN
3	4973	FLWDDSMAL	FLWDDSM[147]AL/2	1657.67	A02	9	sp|O95834|EMAL2_HUMAN
12	19872	KLLDPEDISV	KLLDPEDISV/2	1656	A02	10	sp|Q01082|SPTB2_HUMAN
12	19776	KIIGIMEEV	KIIGIM[147]EEV/2	1648	A02	9	sp|P52701|MSH6_HUMAN
9	14831	FLDEPTNHL	FLDEPTNHL/2	1647.89	A02	9	sp|Q9UG63|ABCF2_HUMAN
5	8221	ALMAHAMEEV	ALM[147]AHAM[147]EEV/2	1644.2	A02	10	sp|Q07666|KHDR1_HUMAN
13	21319	GLIDVKPLGV	GLIDVKPLGV/2	1639.92	A02	10	sp|Q8WVY7|UBCP1_HUMAN
13	21298	QLVDFQWKL	QLVDFQWKL/2	1638.31	A02	9	sp|Q7Z4G1|COMD6_HUMAN
4	6532	FLAGAVTSV	FLAGAVTSV/2	1633	A02	9	sp|A8MPS7|YDJC_HUMAN
7	11362	SLLPFWYTL	SLLPFWYTL/2	1623.14	A02	9	sp|Q14697|GANAB_HUMAN
12	19446	ILNTLNITV	ILNTLNITV/2	1620.5	A02	9	sp|Q8TCJ2|STT3B_HUMAN
12	19433	QLLEKVPTL	QLLEKVPTL/2	1619.42	A02	9	sp|Q96T49|PP16B_HUMAN
12	19405	GLVASLISV	GLVASLISV/2	1617.08	A02	9	sp|O95347|SMC2_HUMAN
14	22516	YLPHAPPFA	YLPHAPPFA/2	1608.29	A02	9	sp|P17275|JUNB_HUMAN
7	11253	ALAGGITMV	ALAGGITM[147]V/2	1607.57	A02	9	sp|P27708|PYR1_HUMAN
10	16072	HLWAELVFL	HLWAELVFL/2	1607.2	A02	9	sp|Q00610|CLH1_HUMAN
14	22469	SLIEKLWQT	SLIEKLWQT/2	1604.93	A02	9	sp|P48380|RFX3_HUMAN
13	20761	RILDILEYI	RILDILEYI/2	1597	A02	9	sp|Q99986|VRK1_HUMAN
13	20754	TLYEAVREV	TLYEAVREV/2	1596.46	A02	9	sp|P62906|RL10A_HUMAN
7	11165	YLADTVQKL	YLADTVQKL/2	1595	A02	9	sp|Q9NX45|SOLH2_HUMAN
12	19137	TLYDSRLFV	TLYDSRLFV/2	1594.75	A02	9	sp|Q96Q05|TPPC9_HUMAN
6	9563	FLLQHVQEL	FLLQHVQEL/2	1593.83	A02	9	sp|Q9HC29|NOD2_HUMAN
12	19031	LLSKVLIYL	LLSKVLIYL/2	1585.92	A02	9	sp|O14981|BTAF1_HUMAN
12	19029	MLYEKLLTA	M[147]LYEKLLTA/2	1585.75	A02	9	sp|Q76N89|HECW1_HUMAN
5	7889	YLITHPLAV	YLITHPLAV/2	1577.8	A02	9	sp|Q96N67|DOCK7_HUMAN
12	18913	KIGSIIFQV	KIGSIIFQV/2	1576.08	A02	9	sp|Q460N5|PAR14_HUMAN
14	22046	VLINRIDLV	VLINRIDLV/2	1574.71	A02	9	sp|Q9HCK8|CHD8_HUMAN
10	15746	KLFDRPQEL	KLFDRPQEL/2	1574.6	A02	9	sp|Q5VZ89|DEN4C_HUMAN
9	14170	VLAWGLLNV	VLAWGLLNV/2	1574.44	A02	9	sp|Q96SK2|TM209_HUMAN
11	17312	VLIPKLPQL	VLIPKLPQL/2	1573.82	A02	9	sp|Q8N138|ORML3_HUMAN
12	18872	VLWKEILFL	VLWKEILFL/2	1572.67	A02	9	sp|Q9NPR9|GP108_HUMAN
14	21945	TLINLLLKV	TLINLLLKV/2	1567.5	A02	9	sp|Q9H3H5|GPT_HUMAN
11	17223	SLFLGILSV	SLFLGILSV/2	1565.73	A02	9	sp|P11836|CD20_HUMAN
13	20254	SILHDVVEV	SILHDVVEV/2	1558	A02	9	sp|O75391|SPAG7_HUMAN
10	15557	FLLPHPGLKV	FLLPHPGLKV/2	1555.7	A02	10	sp|Q8WXF7|ATLA1_HUMAN
8	12437	GLMTTVHAI	GLM[147]TTVHAI/2	1554.62	A02	9	sp|P04406|G3P_HUMAN
7	10853	RLIALSFGL	RLIALSFGL/2	1550.43	A02	9	sp|O95140|MFN2_HUMAN
5	7751	KMAEMLVEL	KMAEM[147]LVEL/2	1550.2	A02	9	sp|Q9Y605|MOFA1_HUMAN
12	18591	ALLNGEYLL	ALLNGEYLL/2	1549.25	A02	9	sp|Q9BV38|WDR18_HUMAN
10	15468	KLYELYLQL	KLYELYLQL/2	1546.8	A02	9	sp|O75691|UTP20_HUMAN
12	18498	FLQEGDLISA	FLQEGDLISA/2	1541.5	A02	10	sp|Q13868|EXOS2_HUMAN
10	15401	KLLDIPGLEV	KLLDIPGLEV/2	1540.1	A02	10	sp|Q96CD2|COAC_HUMAN
3	4612	RLWDHATMTEV	RLWDHATM[147]TEV/3	1537.33	A02	11	sp|Q9Y3F4|STRAP_HUMAN
10	15362	KVLDFEHFL	KVLDFEHFL/3	1536.2	A02	9	sp|P60660|MYL6_HUMAN
10	15313	FLYDTHQNL	FLYDTHQNL/2	1531.3	A02	9	sp|P16885|PLCG2_HUMAN
9	13751	KLIDDQDISISL	KLIDDQDISISL/2	1527.89	A02	12	sp|Q96JI7|SPTCS_HUMAN
6	9120	FIADHCPTL	FIADHCPTL/2	1520	A02	9	sp|Q13098|CSN1_HUMAN
12	18130	LLLKGVEAV	LLLKGVEAV/2	1510.83	A02	9	sp|Q9UJV9|DDX41_HUMAN
15	22634	KMPEINAKV	KM[147]PEINAKV/2	1508.93	A02	9	sp|Q15011|HERP1_HUMAN
8	12062	FILPFIIAA	FILPFIIAA/2	1507.75	A02	9	sp|P00156|CYB_HUMAN
7	10536	ALADGVTMQV	ALADGVTM[147]QV/2	1505.14	A02	10	sp|Q9UBF2|COPG2_HUMAN
9	13541	ILNPYNLFL	ILNPYNLFL/2	1504.56	A02	9	sp|Q9UGL1|KDM5B_HUMAN
13	19511	SLASLLAKV	SLASLLAKV/2	1500.85	A02	9	sp|Q9NR09|BIRC6_HUMAN
14	20953	YLDQTLPRA	YLDQTLPRA/2	1496.64	A02	9	sp|A8MPP1|D11L8_HUMAN
9	13380	YMVHIQVTL	YM[147]VHIQVTL/2	1486.67	A02	9	sp|P32970|CD70_HUMAN
10	14846	MLDSLRIYL	M[147]LDSLRIYL/2	1484.6	A02	9	sp|Q9Y4A5|TRRAP_HUMAN
12	17815	VLFENTDSVHL	VLFENTDSVHL/2	1484.58	A02	11	sp|P42696|RBM34_HUMAN
15	22237	GLIGQLDEV	GLIGQLDEV/2	1482.47	A02	9	sp|Q9UL15|BAG5_HUMAN
9	13330	VLLSPVPEL	VLLSPVPEL/2	1481.11	A02	9	sp|Q9H1A4|APC1_HUMAN
9	13294	RLIEETISI	RLIEETISI/2	1477.11	A02	9	sp|O95249|GOSR1_HUMAN
13	19123	KLNEVYEAV	KLNEVYEAV/2	1471	A02	9	sp|Q86U86|PB1_HUMAN
10	14694	LLAELPASV	LLAELPASV/2	1469.4	A02	9	sp|Q14254|FLOT2_HUMAN
13	19065	FLYIGIITI	FLYIGIITI/2	1466.54	A02	9	sp|P19397|CD53_HUMAN
11	16113	SLYPVLNFL	SLYPVLNFL/2	1464.82	A02	9	sp|Q96S52|PIGS_HUMAN
16	23365	GLNEEIARV	GLNEEIARV/2	1460.31	A02	9	sp|O14777|NDC80_HUMAN
10	14596	ALSDHHIYL	ALSDHHIYL/2	1459.6	A02	9	sp|P04075|ALDOA_HUMAN
15	21893	ALAEEVEQV	ALAEEVEQV/2	1459.53	A02	9	sp|Q9BQE5|APOL2_HUMAN
9	13101	ALWSLPLYL	ALWSLPLYL/2	1455.67	A02	9	sp|O15287|FANCG_HUMAN
16	23259	KITEYLERV	KITEYLERV/2	1453.69	A02	9	sp|Q9Y6W3|CAN7_HUMAN
12	17346	ALYPHLPPEA	ALYPHLPPEA/2	1445.5	A02	10	sp|Q13501|SQSTM_HUMAN
11	15877	KVLEHVVRV	KVLEHVVRV/3	1443.36	A02	9	sp|P43358|MAGA4_HUMAN
11	15848	SMYDKVLML	SM[147]YDKVLM[147]L/2	1440.73	A02	9	sp|Q9Y5Q8|TF3C5_HUMAN
14	20153	KLFEGENEHL	KLFEGENEHL/2	1439.5	A02	10	sp|Q13576|IQGA2_HUMAN
5	7183	YLASLIRSV	YLASLIRSV/2	1436.6	A02	9	sp|P51665|PSMD7_HUMAN
14	20074	LLHSFVDSV	LLHSFVDSV/2	1433.86	A02	9	sp|Q12772|SRBP2_HUMAN
9	12886	LLATVLQAV	LLATVLQAV/2	1431.78	A02	9	sp|O60613|SEP15_HUMAN
13	18607	LLFDQAYQM	LLFDQAYQM[147]/2	1431.31	A02	9	sp|Q6PL18|ATAD2_HUMAN
14	19955	AMIELVERL	AMIELVERL/2	1425.36	A02	9	sp|Q96DX7|TRI44_HUMAN
11	15612	KLYEQHHVV	KLYEQHHVV/3	1419.27	A02	9	sp|Q15392|DHC24_HUMAN
13	18417	KIIKIIITV	KIIKIIITV/2	1416.69	A02	9	sp|Q15149|PLEC_HUMAN
15	21245	QLQDFDWQV	QLQDFDWQV/2	1416.33	A02	9	sp|Q9NX08|COMD8_HUMAN
14	19814	LLDRIVSV	LLDRIVSV/2	1415.29	A02	8	sp|Q92621|NU205_HUMAN
10	14138	KLIGDTPIDTFL	KLIGDTPIDTFL/2	1413.8	A02	12	sp|P19793|RXRA_HUMAN
12	16942	VLASLIIRL	VLASLIIRL/2	1411.83	A02	9	sp|Q92878|RAD50_HUMAN
12	16870	KLQNLNIFL	KLQNLNIFL/2	1405.83	A02	9	sp|A0AVT1|UBA6_HUMAN
12	16852	YLQPKLLGI	YLQPKLLGI/2	1404.33	A02	9	sp|Q13535|ATR_HUMAN
15	21047	FMLPDPQNI	FM[147]LPDPQNI/2	1403.13	A02	9	sp|Q8WW01|SEN15_HUMAN
10	14014	FVFETPFTL	FVFETPFTL/2	1401.4	A02	9	sp|Q96BY6|DOC10_HUMAN
13	18197	VLFSSPPVILL	VLFSSPPVILL/2	1399.77	A02	11	sp|P04156|PRIO_HUMAN
15	20990	TLIGLSIKV	TLIGLSIKV/2	1399.33	A02	9	sp|Q9Y3D0|MIP18_HUMAN
14	19521	ALVSTIIMV	ALVSTIIM[147]V/2	1394.36	A02	9	sp|Q96SN7|ORAI2_HUMAN
14	19456	KLHDVELHQV	KLHDVELHQV/3	1389.71	A02	10	sp|O14775|GBB5_HUMAN
11	15286	SLWHLPLL	SLWHLPLL/2	1389.64	A02	8	sp|Q12887|COX10_HUMAN
12	16649	YLTNEGIQYL	YLTNEGIQYL/2	1387.42	A02	10	sp|P46783|RS10_HUMAN
9	12485	GLMGAGIAQV	GLM[147]GAGIAQV/2	1387.22	A02	10	sp|P40939|ECHA_HUMAN
15	20793	SLLGDDALVQV	SLLGDDALVQV/2	1386.2	A02	11	sp|Q15393|SF3B3_HUMAN
10	13774	GLAPFLLNAV	GLAPFLLNAV/2	1377.4	A02	10	sp|A6NFQ2|F115C_HUMAN
12	16527	VLIKNLLVSV	VLIKNLLVSV/2	1377.25	A02	10	sp|Q9UPN3|MACF1_HUMAN
15	20618	LTIEDGIFEV	LTIEDGIFEV/2	1374.53	A02	10	sp|P54652|HSP72_HUMAN
15	20555	LLDPNVKSIFV	LLDPNVKSIFV/2	1370.33	A02	11	sp|O43414|ERI3_HUMAN
9	12306	ALAGVSFEI	ALAGVSFEI/2	1367.33	A02	9	sp|Q5JPE7|NOMO2_HUMAN
8	10937	ALVDHVAEL	ALVDHVAEL/2	1367.12	A02	9	sp|B0I1T2|MYO1G_HUMAN
8	10928	VIMKSSPEV	VIM[147]KSSPEV/2	1366	A02	9	sp|Q9NRG0|CHRC1_HUMAN
8	10865	FLVQNIHTL	FLVQNIHTL/2	1358.12	A02	9	sp|Q8TDN6|BRX1_HUMAN
12	16233	VLIETLVTL	VLIETLVTL/2	1352.75	A02	9	sp|P23526|SAHH_HUMAN
9	12144	ILSELAPSL	ILSELAPSL/2	1349.33	A02	9	sp|Q86X83|COMD2_HUMAN
7	9439	FLLPTGVYL	FLLPTGVYL/2	1348.43	A02	9	sp|O00329|PK3CD_HUMAN
10	13483	AMNGKSFSV	AM[147]NGKSFSV/2	1348.3	A02	9	sp|Q9H7F0|AT133_HUMAN
17	22894	SLQDEIQRV	SLQDEIQRV/2	1346.71	A02	9	sp|Q9UNX4|WDR3_HUMAN
13	17471	KLIDETQDMLL	KLIDETQDM[147]LL/2	1343.92	A02	11	sp|Q5T4S7|UBR4_HUMAN
14	18798	RMWEDPMGA	RM[147]WEDPMGA/2	1342.71	A02	9	sp|Q9ULX6|AKP8L_HUMAN
17	22807	ILYDKLEKI	ILYDKLEKI/3	1341.59	A02	9	sp|Q99832|TCPH_HUMAN
14	18774	FLDPNNIPKA	FLDPNNIPKA/2	1341	A02	10	sp|Q9BVK2|ALG8_HUMAN
12	16085	KLGDFGLATV	KLGDFGLATV/2	1340.42	A02	10	sp|Q8N568|DCLK2_HUMAN
10	13373	SLAADIPRL	SLAADIPRL/2	1337.3	A02	9	sp|Q8N0X4|CLYBL_HUMAN
4	5334	KLMGQIHQL	KLM[147]GQIHQL/3	1333.5	A02	9	sp|Q8TBA6|GOGA5_HUMAN
8	10616	LLLDVPTAAV	LLLDVPTAAV/2	1327	A02	10	sp|P13284|GILT_HUMAN
13	17238	VLFDVTGQVRL	VLFDVTGQVRL/2	1326	A02	11	sp|Q14764|MVP_HUMAN
12	15841	LLQNNLPAV	LLQNNLPAV/2	1320.08	A02	9	sp|P48643|TCPE_HUMAN
14	18481	ALLEADVNIKL	ALLEADVNIKL/2	1320.07	A02	11	sp|P61011|SRP54_HUMAN
14	18428	SLHDALCVV	SLHDALCVV/2	1316.29	A02	9	sp|P17987|TCPA_HUMAN
7	9182	FLYQYSTRL	FLYQYSTRL/2	1311.71	A02	9	sp|Q9BUN8|DERL1_HUMAN
8	10491	AMNGHVPAV	AM[147]NGHVPAV/2	1311.38	A02	9	sp|Q8IWZ3|ANKH1_HUMAN
11	14333	KLHYVVTEV	KLHYVVTEV/2	1303	A02	9	sp|Q9Y4A5|TRRAP_HUMAN
14	18174	ALSDLEITL	ALSDLEITL/2	1298.14	A02	9	sp|Q96AC1|FERM2_HUMAN
15	19457	YLSVKVWDL	YLSVKVWDL/2	1297.13	A02	9	sp|Q66LE6|2ABD_HUMAN
10	12837	VLMDLKALLL	VLM[147]DLKALLL/2	1283.7	A02	10	sp|Q9UJV9|DDX41_HUMAN
11	14111	ALLSGIVSI	ALLSGIVSI/2	1282.82	A02	9	sp|Q13505|MTX1_HUMAN
16	20519	IIDGKIFCV	IIDGKIFCV/2	1282.44	A02	9	sp|P60510|PP4C_HUMAN
14	17855	KLWPEASKVKV	KLWPEASKVKV/3	1275.36	A02	11	sp|Q9NZJ4|SACS_HUMAN
10	12714	FLLPHPGLQV	FLLPHPGLQV/2	1271.4	A02	10	sp|Q6DD88|ATLA3_HUMAN
15	19066	LLVPTSGIYFV	LLVPTSGIYFV/2	1271.07	A02	11	sp|P01374|TNFB_HUMAN
16	20325	NMYGKVVTV	NM[147]YGKVVTV/2	1270.31	A02	9	sp|O00267|SPT5H_HUMAN
12	15241	KLQEFLQTL	KLQEFLQTL/2	1270.08	A02	9	sp|Q9NVI1|FANCI_HUMAN
17	21590	TLVYHVVGV	TLVYHVVGV/2	1270	A02	9	sp|Q15393|SF3B3_HUMAN
9	11425	HLAEVSAEV	HLAEVSAEV/2	1269.44	A02	9	sp|O95229|ZWINT_HUMAN
7	8882	YLTPLILTL	YLTPLILTL/2	1268.86	A02	9	sp|Q9NX61|T161A_HUMAN
4	5063	TLMGHMLYL	TLM[147]GHM[147]LYL/2	1265.75	A02	9	sp|Q9Y450|HBS1L_HUMAN
15	18945	HLVPEVPTV	HLVPEVPTV/2	1263	A02	9	sp|O15156|ZBT7B_HUMAN
18	22724	TLDEKIEKV	TLDEKIEKV/2	1262.44	A02	9	sp|Q96GQ7|DDX27_HUMAN
14	17674	ALTDFVRSV	ALTDFVRSV/2	1262.43	A02	9	sp|O60888|CUTA_HUMAN
14	17636	FLPDPSALQNL	FLPDPSALQNL/2	1259.71	A02	11	sp|Q9NXR7|BRE_HUMAN
16	20071	ILNPEVVTV	ILNPEVVTV/2	1254.44	A02	9	sp|Q9UK61|F208A_HUMAN
9	11256	GLMKKAYEL	GLMKKAYEL/2	1250.67	A02	9	sp|Q02078|MEF2A_HUMAN
16	19992	SLFPHNPQFI	SLFPHNPQFI/2	1249.5	A02	10	sp|Q9H9Y2|RPF1_HUMAN
17	21234	SLLENIAKA	SLLENIAKA/2	1249.06	A02	9	sp|Q93074|MED12_HUMAN
15	18544	KLTSVLEAV	KLTSVLEAV/2	1236.27	A02	9	sp|P98198|AT8B2_HUMAN
17	20978	KLFKAPAYI	KLFKAPAYI/2	1234	A02	9	sp|Q14CB8|RHG19_HUMAN
15	18490	QLLKSLPEL	QLLKSLPEL/2	1232.67	A02	9	sp|O60566|BUB1B_HUMAN
14	17229	KVLGIVVGV	KVLGIVVGV/2	1230.64	A02	9	sp|A5YKK6|CNOT1_HUMAN
12	14766	VLYPHEPTAV	VLYPHEPTAV/2	1230.5	A02	10	sp|Q9NYP3|DONS_HUMAN
13	15992	KMVSIQITL	KMVSIQITL/2	1230.15	A02	9	sp|O00203|AP3B1_HUMAN
10	12278	TLSDIMVSL	TLSDIM[147]VSL/2	1227.8	A02	9	sp|Q9NXF1|TEX10_HUMAN
10	12255	KLLEPVLLL	KLLEPVLLL/2	1225.5	A02	9	sp|P62249|RS16_HUMAN
13	15874	ILDPHVVLL	ILDPHVVLL/2	1221.08	A02	9	sp|Q99567|NUP88_HUMAN
16	19520	KLYQEVEIASV	KLYQEVEIASV/2	1220	A02	11	sp|Q92900|RENT1_HUMAN
16	19519	TLWEIAKAEV	TLWEIAKAEV/2	1219.94	A02	10	sp|Q8TCX1|DC2L1_HUMAN
8	9695	KLLDIRSYL	KLLDIRSYL/2	1211.88	A02	9	sp|P51665|PSMD7_HUMAN
17	20569	TLVDFPLHL	TLVDFPLHL/2	1209.94	A02	9	sp|Q8WXG6|MADD_HUMAN
16	19294	QLWNNYFHL	QLWNNYFHL/2	1205.88	A02	9	sp|Q14185|DOCK1_HUMAN
4	4812	YLSKIIPAL	YLSKIIPAL/2	1203	A02	9	sp|P40937|RFC5_HUMAN
16	19246	VMFRTPLASV	VM[147]FRTPLASV/2	1202.88	A02	10	sp|Q9UKT4|FBX5_HUMAN
15	17997	ALAEALKEV	ALAEALKEV/2	1199.8	A02	9	sp|Q6PI26|SHQ1_HUMAN
16	19128	VLFELKLLL	VLFELKLLL/2	1195.5	A02	9	sp|Q8N1F7|NUP93_HUMAN
17	20273	NLLPKLHIV	NLLPKLHIV/2	1192.53	A02	9	sp|O00299|CLIC1_HUMAN
15	17862	KLLEEQGIFL	KLLEEQGIFL/2	1190.8	A02	10	sp|Q5T4S7|UBR4_HUMAN
15	17833	ALINNIVEI	ALINNIVEI/2	1188.87	A02	9	sp|Q75V66|ANO5_HUMAN
14	16633	ILSEVQQAV	ILSEVQQAV/2	1188.07	A02	9	sp|P09874|PARP1_HUMAN
13	15409	TLYEHNNEL	TLYEHNNEL/2	1185.31	A02	9	sp|Q9NRG9|AAAS_HUMAN
9	10563	RLYSVSYLL	RLYSVSYLL/2	1173.67	A02	9	sp|P21333|FLNA_HUMAN
13	15194	SLAELKGFEV	SLAELKGFEV/2	1168.77	A02	10	sp|Q07864|DPOE1_HUMAN
15	17520	VMGKIFAV	VM[147]GKIFAV/2	1168	A02	8	sp|Q9P2G9|KLHL8_HUMAN
12	13995	KLWEMDNML	KLWEM[147]DNM[147]L/2	1166.25	A02	9	sp|Q9Y605|MOFA1_HUMAN
16	18641	FLAKLIAQA	FLAKLIAQA/2	1165.06	A02	9	sp|P50990|TCPQ_HUMAN
18	20967	GLVGALMHV	GLVGALM[147]HV/2	1164.83	A02	9	sp|P42768|WASP_HUMAN
13	15096	SLINVGLISV	SLINVGLISV/2	1161.23	A02	10	sp|Q92688|AN32B_HUMAN
11	12773	RLIPIIVLL	RLIPIIVLL/2	1161.18	A02	9	sp|B0I1T2|MYO1G_HUMAN
16	18568	SLVELLVQL	SLVELLVQL/2	1160.5	A02	9	sp|Q9H1A4|APC1_HUMAN
17	19662	ILSKDGVLYV	ILSKDGVLYV/2	1156.59	A02	10	sp|Q9H1A4|APC1_HUMAN
17	19652	SLADLQNDEV	SLADLQNDEV/2	1156	A02	10	sp|P61247|RS3A_HUMAN
19	21906	NLVSFLETV	NLVSFLETV/2	1152.95	A02	9	sp|Q9GZX9|TWSG1_HUMAN
15	17274	RIIDVVYNA	RIIDVVYNA/2	1151.6	A02	9	sp|P62241|RS8_HUMAN
15	17140	RLFNDPVAMV	RLFNDPVAM[147]V/2	1142.67	A02	10	sp|Q92685|ALG3_HUMAN
12	13681	MLLSVPLLL	M[147]LLSVPLLL/2	1140.08	A02	9	sp|P27797|CALR_HUMAN
16	18219	KLLTEVHAA	KLLTEVHAA/2	1138.69	A02	9	sp|P78325|ADAM8_HUMAN
15	17037	SIYGGFLLGV	SIYGGFLLGV/2	1135.8	A02	10	sp|P35606|COPB2_HUMAN
10	11350	GMAQKTWEL	GM[147]AQKTWEL/2	1135	A02	9	sp|Q92905|CSN5_HUMAN
14	15865	KLYPQLPAEI	KLYPQLPAEI/2	1133.21	A02	10	sp|Q9HCE0|EPG5_HUMAN
14	15842	VLWGETVHL	VLWGETVHL/2	1131.57	A02	9	sp|P41279|M3K8_HUMAN
11	12446	KLIPLLLQL	KLIPLLLQL/2	1131.45	A02	9	sp|P69849|NOMO3_HUMAN
20	22527	VLLTRLENV	VLLTRLENV/2	1126.35	A02	9	sp|Q8TBE0|BAHD1_HUMAN
19	21306	KQVEEIFNL	KQVEEIFNL/2	1121.37	A02	9	sp|P78347|GTF2I_HUMAN
17	19029	AIIDGKIFCV	AIIDGKIFCV/2	1119.35	A02	10	sp|P60510|PP4C_HUMAN
13	14506	ALNSKILSV	ALNSKILSV/2	1115.85	A02	9	sp|Q96NW4|ANR27_HUMAN
18	20027	SLQSTILGV	SLQSTILGV/2	1112.61	A02	9	sp|Q86WA8|LONP2_HUMAN
18	19817	KLIEKLDIKL	KLIEKLDIKL/3	1100.94	A02	10	sp|P13639|EF2_HUMAN
17	18700	FLLDPVKGERL	FLLDPVKGERL/3	1100	A02	11	sp|Q15149|PLEC_HUMAN
8	8787	ILAALTIFL	ILAALTIFL/2	1098.38	A02	9	sp|Q13315|ATM_HUMAN
16	17542	AIVDKVPSV	AIVDKVPSV/2	1096.38	A02	9	sp|Q9Y678|COPG1_HUMAN
16	17448	VLYGGLLEHL	VLYGGLLEHL/2	1090.5	A02	10	sp|Q86UT8|CCD84_HUMAN
17	18436	KVFDPVPVGV	KVFDPVPVGV/2	1084.47	A02	10	sp|Q08211|DHX9_HUMAN
16	17346	FLSLINVGL	FLSLINVGL/2	1084.12	A02	9	sp|Q92688|AN32B_HUMAN
14	15170	KLQEKIQEL	KLQEKIQEL/2	1083.57	A02	9	sp|Q02224|CENPE_HUMAN
13	14059	KLGDFGLLVEL	KLGDFGLLVEL/2	1081.46	A02	11	sp|Q99640|PMYT1_HUMAN
19	20412	ILHDDEVTV	ILHDDEVTV/2	1074.32	A02	9	sp|P05386|RLA1_HUMAN
18	19314	GLYQGQVLV	GLYQGQVLV/2	1073	A02	9	sp|Q9Y4E8|UBP15_HUMAN
20	21418	GLVGSLQEV	GLVGSLQEV/2	1070.9	A02	9	sp|Q9H1A4|APC1_HUMAN
17	18186	VLQDIQVML	VLQDIQVM[147]L/2	1069.77	A02	9	sp|P33992|MCM5_HUMAN
20	21321	SLFEKGLKNV	SLFEKGLKNV/2	1066.05	A02	10	sp|Q9UKA1|FBXL5_HUMAN
19	20217	ALYDNVEKL	ALYDNVEKL/2	1064.05	A02	9	sp|P08243|ASNS_HUMAN
12	12731	ALFPGVALL	ALFPGVALL/2	1060.92	A02	9	sp|P30101|PDIA3_HUMAN
17	17995	LLLDMQNRL	LLLDM[147]QNRL/2	1058.53	A02	9	sp|Q16531|DDB1_HUMAN
18	18983	TLIGIVLGL	TLIGIVLGL/2	1054.61	A02	9	sp|Q05086|UBE3A_HUMAN
19	20006	ALSGHLETV	ALSGHLETV/2	1052.95	A02	9	sp|P07355|ANXA2_HUMAN
17	17892	HLTDITLKV	HLTDITLKV/2	1052.47	A02	9	sp|Q15046|SYK_HUMAN
22	23153	GLIEILKKV	GLIEILKKV/2	1052.41	A02	9	sp|O14737|PDCD5_HUMAN
18	18924	GLIDVHVHL	GLIDVHVHL/2	1051.33	A02	9	sp|P27708|PYR1_HUMAN
8	8390	KLAEGVQLL	KLAEGVQLL/2	1048.75	A02	9	sp|Q9BZH6|WDR11_HUMAN
12	12566	NLAKCIVSV	NLAKCIVSV/2	1047.17	A02	9	sp|Q96GQ5|CP058_HUMAN
9	9410	TLAKYLMEL	TLAKYLM[147]EL/2	1045.56	A02	9	sp|O95067|CCNB2_HUMAN
12	12534	YLFDRNGVCL	YLFDRNGVCL/2	1044.5	A02	10	sp|Q9Y5R8|TPPC1_HUMAN
12	12516	ALSDHHVYL	ALSDHHVYL/2	1043	A02	9	sp|P09972|ALDOC_HUMAN
18	18763	VLLDTANKKVFL	VLLDTANKKVFL/2	1042.39	A02	12	sp|P08243|ASNS_HUMAN
12	12494	LIWPLLSTV	LIWPLLSTV/2	1041.17	A02	9	sp|Q99567|NUP88_HUMAN
19	19776	ALILEPSLYTV	ALILEPSLYTV/2	1040.84	A02	11	sp|P61923|COPZ1_HUMAN
19	19765	SLYREILFL	SLYREILFL/2	1040.26	A02	9	sp|Q5VZ89|DEN4C_HUMAN
20	20801	SLIKQIPRI	SLIKQIPRI/2	1040.05	A02	9	sp|P62906|RL10A_HUMAN
19	19710	FLYTGEGDTV	FLYTGEGDTV/2	1037.37	A02	10	sp|P98170|XIAP_HUMAN
16	16584	YLLQEPPRTV	YLLQEPPRTV/2	1036.5	A02	10	sp|Q96IZ0|PAWR_HUMAN
15	15546	SLIEKVTQL	SLIEKVTQL/2	1036.4	A02	9	sp|Q9NS87|KIF15_HUMAN
14	14490	LLIGIITQL	LLIGIITQL/2	1035	A02	9	sp|Q05DH4|F16A1_HUMAN
16	16519	ILLNPAYDVYL	ILLNPAYDVYL/2	1032.44	A02	11	sp|Q8TEM1|PO210_HUMAN
10	10307	RLFEGNALL	RLFEGNALL/2	1030.7	A02	9	sp|P46781|RS9_HUMAN
12	12325	RLNDFASTV	RLNDFASTV/2	1027.08	A02	9	sp|P20674|COX5A_HUMAN
19	19487	TLADLRVLFGI	TLADLRVLFGI/2	1025.63	A02	11	sp|Q9UNY4|TTF2_HUMAN
14	14324	KVFSAFITV	KVFSAFITV/2	1023.14	A02	9	sp|Q5SRE5|NU188_HUMAN
10	10196	FLSEHPNVTL	FLSEHPNVTL/2	1019.6	A02	10	sp|Q9UH17|ABC3B_HUMAN
16	16287	GMYGKIAVMEL	GM[147]YGKIAVM[147]EL/2	1017.94	A02	11	sp|Q16531|DDB1_HUMAN
18	18239	ALPPVLTTV	ALPPVLTTV/2	1013.28	A02	9	sp|Q6PKG0|LARP1_HUMAN
15	15191	SLTGHISTV	SLTGHISTV/2	1012.73	A02	9	sp|O43660|PLRG1_HUMAN
13	13157	ALFGTILEL	ALFGTILEL/2	1012.08	A02	9	sp|P30679|GNA15_HUMAN
17	17147	ALPEIFTEL	ALPEIFTEL/2	1008.65	A02	9	sp|Q2VIR3|IF2GL_HUMAN
19	19141	GLLAGDRLVEV	GLLAGDRLVEV/2	1007.42	A02	11	sp|O14745|NHRF1_HUMAN
12	12073	ALASVIMGL	ALASVIM[147]GL/2	1006.08	A02	9	sp|P30153|2AAA_HUMAN
7	7034	RLYPWGVVEV	RLYPWGVVEV/2	1004.86	A02	10	sp|Q15019|SEPT2_HUMAN
19	19072	SLYPIAVLI	SLYPIAVLI/2	1003.79	A02	9	sp|P30153|2AAA_HUMAN
19	19041	LLSPVVPQI	LLSPVVPQI/2	1002.16	A02	9	sp|Q8N1F7|NUP93_HUMAN
20	20033	ILQDRLNQV	ILQDRLNQV/2	1001.65	A02	9	sp|Q99741|CDC6_HUMAN
14	14018	KLADQCTGL	KLADQCTGL/2	1001.29	A02	9	sp|Q71U36|TBA1A_HUMAN
18	17974	TLLDGKLVLL	TLLDGKLVLL/2	998.556	A02	10	sp|Q86YV0|RASL3_HUMAN
7	6970	KLLPSVTEL	KLLPSVTEL/2	995.714	A02	9	sp|Q8IZX4|TAF1L_HUMAN
16	15924	LLLNYAVRL	LLLNYAVRL/2	995.25	A02	9	sp|Q92989|CLP1_HUMAN
14	13927	SLFERLVVL	SLFERLVVL/2	994.786	A02	9	sp|Q92900|RENT1_HUMAN
21	20874	KLLGNIKNV	KLLGNIKNV/2	994	A02	9	sp|Q00688|FKBP3_HUMAN
20	19859	QLIPKLIFL	QLIPKLIFL/2	992.95	A02	9	sp|Q6ZS81|WDFY4_HUMAN
8	7917	LLMATILHL	LLMATILHL/2	989.625	A02	9	sp|P53618|COPB_HUMAN
12	11850	KLIANNTTV	KLIANNTTV/2	987.5	A02	9	sp|O96019|ACL6A_HUMAN
9	8848	LLLDVTPLSL	LLLDVTPLSL/2	983.111	A02	10	sp|P38646|GRP75_HUMAN
17	16675	TLAETLVNL	TLAETLVNL/2	980.882	A02	9	sp|Q8NB46|ANR52_HUMAN
22	21577	SLGKDFLTGV	SLGKDFLTGV/2	980.773	A02	10	sp|P49662|CASP4_HUMAN
15	14690	FLDGHDLQL	FLDGHDLQL/2	979.333	A02	9	sp|Q969V6|MKL1_HUMAN
20	19558	ALAERLDIV	ALAERLDIV/2	977.9	A02	9	sp|Q6QNY0|BL1S3_HUMAN
22	21456	AMPDSPAEV	AM[147]PDSPAEV/2	975.273	A02	9	sp|O75081|MTG16_HUMAN
21	20377	KLVEFDFLGA	KLVEFDFLGA/2	970.333	A02	10	sp|Q9Y6A5|TACC3_HUMAN
16	15497	SLFGGSVKL	SLFGGSVKL/2	968.562	A02	9	sp|Q8WUM4|PDC6I_HUMAN
14	13544	FILPKEIAV	FILPKEIAV/2	967.429	A02	9	sp|Q9H1A4|APC1_HUMAN
16	15448	YLQHVQIRL	YLQHVQIRL/3	965.5	A02	9	sp|Q6EMB2|TTLL5_HUMAN
3	2882	RLWEYLLEL	RLWEYLLEL/2	960.667	A02	9	sp|Q01082|SPTB2_HUMAN
22	21107	GLFAGPCKV	GLFAGPCKV/2	959.409	A02	9	sp|P78527|PRKDC_HUMAN
16	15344	ILQQHIATV	ILQQHIATV/2	959	A02	9	sp|Q9Y575|ASB3_HUMAN
23	21989	GLSTEGIYRV	GLSTEGIYRV/2	956.043	A02	10	sp|Q9NRY4|RHG35_HUMAN
19	18099	ILMEHIHKLKA	ILM[147]EHIHKLKA/3	952.579	A02	11	sp|P84098|RL19_HUMAN
16	15220	KLLPETVTI	KLLPETVTI/2	951.25	A02	9	sp|Q9HAS0|NJMU_HUMAN
19	18028	ALTGYLHTI	ALTGYLHTI/2	948.842	A02	9	sp|Q9NYY8|FAKD2_HUMAN
12	11385	YIIEVNARL	YIIEVNARL/2	948.75	A02	9	sp|P27708|PYR1_HUMAN
20	18952	ALYEQSLHI	ALYEQSLHI/2	947.6	A02	9	sp|P61201|CSN2_HUMAN
23	21666	YLVVKIEKV	YLVVKIEKV/3	942	A02	9	sp|Q8NF50|DOCK8_HUMAN
16	14927	ALIARVTNV	ALIARVTNV/2	932.938	A02	9	sp|Q9ULZ3|ASC_HUMAN
13	12082	RLTPKLMEV	RLTPKLM[147]EV/2	929.385	A02	9	sp|O15372|EIF3H_HUMAN
19	17604	ALTGLLVFL	ALTGLLVFL/2	926.526	A02	9	sp|A1A5B4|ANO9_HUMAN
13	12033	ALIPETTTLTV	ALIPETTTLTV/2	925.615	A02	11	sp|Q9UBR5|CKLF_HUMAN
23	21267	LLDSAPLNV	LLDSAPLNV/2	924.652	A02	9	sp|Q8NI36|WDR36_HUMAN
21	19416	GLIGVGLINV	GLIGVGLINV/2	924.571	A02	10	sp|A3KN83|SBNO1_HUMAN
19	17501	TLTSKLYSL	TLTSKLYSL/2	921.105	A02	9	sp|Q9UDW1|QCR9_HUMAN
8	7362	FLQEHNTTL	FLQEHNTTL/2	920.25	A02	9	sp|Q9P219|DAPLE_HUMAN
19	17482	FLNNQEYVL	FLNNQEYVL/2	920.105	A02	9	sp|Q01082|SPTB2_HUMAN
10	9198	FLADPSAFVAA	FLADPSAFVAA/2	919.8	A02	11	sp|Q8NHW5|RLA0L_HUMAN
20	18289	ALFQPHLINV	ALFQPHLINV/2	914.45	A02	10	sp|P61160|ARP2_HUMAN
14	12773	GLYGLIVAL	GLYGLIVAL/2	912.357	A02	9	sp|P27449|VATL_HUMAN
17	15337	ALVSSLHLL	ALVSSLHLL/2	902.176	A02	9	sp|Q9Y678|COPG1_HUMAN
4	3605	YLYGQTTTYL	YLYGQTTTYL/2	901.25	A02	10	sp|P11388|TOP2A_HUMAN
23	20709	SLGKVFGV	SLGKVFGV/2	900.391	A02	8	sp|P54132|BLM_HUMAN
16	14394	KLWEAESKL	KLWEAESKL/2	899.625	A02	9	sp|Q9NYP9|MS18A_HUMAN
22	19772	VMQDPEFLQSV	VM[147]QDPEFLQSV/2	898.727	A02	11	sp|A2A3N6|PIPSL_HUMAN
14	12557	RLLPQVDSV	RLLPQVDSV/2	896.929	A02	9	sp|Q9C0B9|ZCHC2_HUMAN
10	8941	FLINTNSEL	FLINTNSEL/2	894.1	A02	9	sp|P27815|PDE4A_HUMAN
14	12485	ALAEKTSHV	ALAEKTSHV/2	891.786	A02	9	sp|Q658P3|STEA3_HUMAN
17	15101	KILDIGLAYI	KILDIGLAYI/2	888.294	A02	10	sp|P49754|VPS41_HUMAN
20	17760	SLLHFTENL	SLLHFTENL/2	888	A02	9	sp|Q56NI9|ESCO2_HUMAN
13	11519	GLAQVITAV	GLAQVITAV/2	886.077	A02	9	sp|Q9UKY1|ZHX1_HUMAN
23	20304	GLWGHPVLA	GLWGHPVLA/2	882.783	A02	9	sp|Q5VZ89|DEN4C_HUMAN
18	15862	RLQEEVHLL	RLQEEVHLL/3	881.222	A02	9	sp|Q674X7|KAZRN_HUMAN
20	17609	KLWQTPLHV	KLWQTPLHV/2	880.45	A02	9	sp|Q8NB46|ANR52_HUMAN
8	7043	KLFPDTPLAL	KLFPDTPLAL/2	880.375	A02	10	sp|Q12906|ILF3_HUMAN
11	9682	KLYKNLLYL	KLYKNLLYL/2	880.182	A02	9	sp|Q6IPR1|LYRM5_HUMAN
17	14922	ALAELFGLLV	ALAELFGLLV/2	877.765	A02	10	sp|Q7Z6Z7|HUWE1_HUMAN
21	18410	RLMKELEEI	RLMKELEEI/2	876.667	A02	9	sp|P68036|UB2L3_HUMAN
24	21016	GLATDVQTV	GLATDVQTV/2	875.667	A02	9	sp|P49720|PSB3_HUMAN
22	19245	SLAQYLINA	SLAQYLINA/2	874.773	A02	9	sp|Q15365|PCBP1_HUMAN
24	20897	MLPHAPGV	MLPHAPGV/2	870.708	A02	8	sp|Q13547|HDAC1_HUMAN
22	18957	GLFSAKLFL	GLFSAKLFL/2	861.682	A02	9	sp|Q14C86|GAPD1_HUMAN
26	22382	KLHLILDYV	KLHLILDYV/2	860.846	A02	9	sp|O75676|KS6A4_HUMAN
23	19758	ALAKEIDSV	ALAKEIDSV/2	859.043	A02	9	sp|P15153|RAC2_HUMAN
24	20592	QLIPAVPGI	QLIPAVPGI/2	858	A02	9	sp|Q12769|NU160_HUMAN
18	15403	LLASEVPQL	LLASEVPQL/2	855.722	A02	9	sp|Q6PJG6|BRAT1_HUMAN
25	21324	ALNGHVEMV	ALNGHVEM[147]V/2	852.96	A02	9	sp|Q8N8A2|ANR44_HUMAN
10	8517	YLLPKDQGITL	YLLPKDQGITL/2	851.7	A02	11	sp|O95273|CCDB1_HUMAN
15	12753	YLPPATQVV	YLPPATQVV/2	850.2	A02	9	sp|P38919|IF4A3_HUMAN
23	19509	ALSQDIPEI	ALSQDIPEI/2	848.217	A02	9	sp|Q6P2E9|EDC4_HUMAN
8	6784	FLHEATVRL	FLHEATVRL/3	848	A02	9	sp|Q12772|SRBP2_HUMAN
16	13535	TLWYRPPEL	TLWYRPPEL/2	845.938	A02	9	sp|Q14004|CDK13_HUMAN
6	5042	FLYPFPLAL	FLYPFPLAL/2	840.333	A02	9	sp|Q5BJD5|TM41B_HUMAN
19	15911	YLLREWVNL	YLLREWVNL/2	837.421	A02	9	sp|A5YKK6|CNOT1_HUMAN
23	19237	RLAVYIDKV	RLAVYIDKV/2	836.391	A02	9	sp|P20700|LMNB1_HUMAN
26	21690	TLLNVIKSV	TLLNVIKSV/2	834.231	A02	9	sp|Q14643|ITPR1_HUMAN
25	20847	SLCPDLMEI	SLCPDLM[147]EI/2	833.88	A02	9	sp|Q9H8H0|NOL11_HUMAN
20	16677	YLTQVDILL	YLTQVDILL/2	833.85	A02	9	sp|Q8NCD3|HJURP_HUMAN
19	15830	ALLDVTPKAV	ALLDVTPKAV/2	833.158	A02	10	sp|Q9UDY2|ZO2_HUMAN
5	4164	MLFPGSIAL	M[147]LFPGSIAL/2	832.8	A02	9	sp|Q15691|MARE1_HUMAN
18	14962	YLHNQGIGV	YLHNQGIGV/2	831.222	A02	9	sp|O60566|BUB1B_HUMAN
21	17420	YLVEINKILL	YLVEINKILL/2	829.524	A02	10	sp|P46939|UTRO_HUMAN
6	4977	YLIGLDPENLAL	YLIGLDPENLAL/2	829.5	A02	12	sp|Q9UKG9|OCTC_HUMAN
14	11612	ALANQKLYSV	ALANQKLYSV/2	829.429	A02	10	sp|Q9NU22|MDN1_HUMAN
15	12436	RLLEVPVML	RLLEVPVM[147]L/2	829.067	A02	9	sp|Q96AB3|ISOC2_HUMAN
22	18218	QLLPLIVNL	QLLPLIVNL/2	828.091	A02	9	sp|O00410|IPO5_HUMAN
25	20696	YLSDIPLHDA	YLSDIPLHDA/2	827.84	A02	10	sp|Q02153|GCYB1_HUMAN
22	18106	KMDDPDYWRTV	KMDDPDYWRTV/2	823	A02	11	sp|Q14137|BOP1_HUMAN
28	22869	QLVDIIEKV	QLVDIIEKV/2	816.75	A02	9	sp|P61289|PSME3_HUMAN
25	20395	GLWGTVVNI	GLWGTVVNI/2	815.8	A02	9	sp|Q86VV8|RTTN_HUMAN
25	20345	ALIDEGETDWKL	ALIDEGETDWKL/2	813.8	A02	12	sp|Q9H2U2|IPYR2_HUMAN
20	16165	LLIPGLATA	LLIPGLATA/2	808.25	A02	9	sp|O15239|NDUA1_HUMAN
23	18552	ALIGTAVGV	ALIGTAVGV/2	806.609	A02	9	sp|Q5T292|CJ128_HUMAN
26	20959	NIFPYPVGV	NIFPYPVGV/2	806.115	A02	9	sp|Q99590|SCAFB_HUMAN
27	21618	KIFDEILVNA	KIFDEILVNA/2	800.667	A02	10	sp|P11388|TOP2A_HUMAN
24	19151	SLYSQVHQI	SLYSQVHQI/2	797.958	A02	9	sp|Q93074|MED12_HUMAN
8	6287	LLAPIVFVL	LLAPIVFVL/2	785.875	A02	9	sp|Q92609|TBCD5_HUMAN
18	14081	YLDPRITVA	YLDPRITVA/2	782.278	A02	9	sp|P11387|TOP1_HUMAN
25	19546	RLIEQEEYL	RLIEQEEYL/2	781.84	A02	9	sp|Q9NTJ3|SMC4_HUMAN
22	17189	ALNEKLVNL	ALNEKLVNL/2	781.318	A02	9	sp|O00303|EIF3F_HUMAN
14	10933	KIFEMGPVFTL	KIFEM[147]GPVFTL/2	780.929	A02	11	sp|P00403|COX2_HUMAN
25	19456	SLLHLGALYGI	SLLHLGALYGI/2	778.24	A02	11	sp|O00767|ACOD_HUMAN
13	10038	RLNEKNYEL	RLNEKNYEL/2	772.154	A02	9	sp|Q9UI12|VATH_HUMAN
19	14620	SILRHVAEV	SILRHVAEV/2	769.474	A02	9	sp|P05198|IF2A_HUMAN
18	13832	RLQDELVTL	RLQDELVTL/2	768.444	A02	9	sp|Q9UPN3|MACF1_HUMAN
27	20717	QLIPALAKV	QLIPALAKV/2	767.296	A02	9	sp|O00167|EYA2_HUMAN
28	21416	GLDVDGIYRV	GLDVDGIYRV/2	764.857	A02	10	sp|Q53QZ3|RHG15_HUMAN
29	22127	LLYDLADQLHA	LLYDLADQLHA/2	763	A02	11	sp|P13804|ETFA_HUMAN
22	16690	YLQTILKEL	YLQTILKEL/2	758.636	A02	9	sp|Q96HM7|PED1B_HUMAN
26	19723	VMFGGKQVVV	VM[147]FGGKQVVV/2	758.577	A02	10	sp|O43865|SAHH2_HUMAN
11	8336	SLYKGLLSV	SLYKGLLSV/2	757.818	A02	9	sp|Q9Y620|RA54B_HUMAN
23	17345	TLSDLRVYL	TLSDLRVYL/2	754.13	A02	9	sp|Q9BYN0|SRXN1_HUMAN
22	16547	TLLGHEFVL	TLLGHEFVL/2	752.136	A02	9	sp|P30260|CDC27_HUMAN
27	20268	KLLEGEECRL	KLLEGEECRL/3	750.667	A02	10	sp|P13647|K2C5_HUMAN
13	9739	MLANDIARL	M[147]LANDIARL/2	749.154	A02	9	sp|Q9H4M9|EHD1_HUMAN
25	18714	AIQDKLFQV	AIQDKLFQV/2	748.56	A02	9	sp|Q9BRQ6|CHCH6_HUMAN
18	13460	ILIRPLVSV	ILIRPLVSV/2	747.778	A02	9	sp|O75027|ABCB7_HUMAN
22	16402	ILNPLLTLL	ILNPLLTLL/2	745.545	A02	9	sp|O60684|IMA7_HUMAN
21	15550	KLYNPENIYL	KLYNPENIYL/2	740.476	A02	10	sp|P23258|TBG1_HUMAN
25	18507	ALIEVPDGFTA	ALIEVPDGFTA/2	740.28	A02	11	sp|Q9H4A4|AMPB_HUMAN
15	11087	GLWGHALLL	GLWGHALLL/2	739.133	A02	9	sp|O15027|SC16A_HUMAN
28	20529	KLISELQKL	KLISELQKL/2	733.179	A02	9	sp|Q5UIP0|RIF1_HUMAN
27	19664	VLLRVLILL	VLLRVLILL/2	728.296	A02	9	sp|O14672|ADA10_HUMAN
28	20361	FLFNTENKL	FLFNTENKL/2	727.179	A02	9	sp|Q13907|IDI1_HUMAN
31	22516	QMISRIEYI	QM[147]ISRIEYI/2	726.323	A02	9	sp|P48730|KC1D_HUMAN
30	21779	HLANIVERV	HLANIVERV/2	725.967	A02	9	sp|Q8IYM9|TRI22_HUMAN
16	11594	ALFPHLLQPVL	ALFPHLLQPVL/2	724.625	A02	11	sp|P55060|XPO2_HUMAN
28	20155	ALIGSLVGA	ALIGSLVGA/2	719.821	A02	9	sp|Q86XK7|VSIG1_HUMAN
12	8588	AIMDLLLRL	AIMDLLLRL/2	715.667	A02	9	sp|Q9UPN7|PP6R1_HUMAN
19	13590	RIIDTVAQV	RIIDTVAQV/2	715.263	A02	9	sp|Q9UKK3|PARP4_HUMAN
17	12123	FLLQLTELTL	FLLQLTELTL/2	713.118	A02	10	sp|P0C7T4|HMSDV_HUMAN
16	11387	KLQNIMMLL	KLQNIM[147]M[147]LL/2	711.688	A02	9	sp|Q9NRZ9|HELLS_HUMAN
13	9236	RLFDEPQLASL	RLFDEPQLASL/2	710.462	A02	11	sp|Q9H0C5|BTBD1_HUMAN
22	15568	YVLPEVSKV	YVLPEVSKV/2	707.636	A02	9	sp|Q9UI10|EI2BD_HUMAN
30	21215	SLKEAVCEV	SLKEAVCEV/2	707.167	A02	9	sp|Q01082|SPTB2_HUMAN
28	19769	RLLDSEIKI	RLLDSEIKI/2	706.036	A02	9	sp|P17980|PRS6A_HUMAN
21	14735	KILPTLEAV	KILPTLEAV/2	701.667	A02	9	sp|Q12905|ILF2_HUMAN
22	15393	KIAQFLESV	KIAQFLESV/2	699.682	A02	9	sp|Q9NU22|MDN1_HUMAN
32	22316	ILQNKIDLV	ILQNKIDLV/2	697.375	A02	9	sp|Q2VIR3|IF2GL_HUMAN
29	20189	VLNNVVIHL	VLNNVVIHL/2	696.172	A02	9	sp|P42858|HD_HUMAN
22	15266	ALLNVELEL	ALLNVELEL/2	693.909	A02	9	sp|Q99832|TCPH_HUMAN
31	21432	ILQEKLQEI	ILQEKLQEI/2	691.355	A02	9	sp|Q4LE39|ARI4B_HUMAN
19	13061	GVIDGHIYAV	GVIDGHIYAV/2	687.421	A02	10	sp|Q14145|KEAP1_HUMAN
24	16496	ALFPERITV	ALFPERITV/2	687.333	A02	9	sp|Q5SQI0|ATAT_HUMAN
27	18497	RLPEIYIQL	RLPEIYIQL/2	685.074	A02	9	sp|Q9H223|EHD4_HUMAN
16	10892	MLLATLLLLLL	MLLATLLLLLL/3	680.75	A02	11	sp|Q7Z4F1|LRP10_HUMAN
32	21744	TLLAAEFLKQV	TLLAAEFLKQV/2	679.5	A02	11	sp|Q99832|TCPH_HUMAN
24	16274	FASHVSPEV	FASHVSPEV/2	678.083	A02	9	sp|Q9NP61|ARFG3_HUMAN
30	20194	TLLTAIVKL	TLLTAIVKL/2	673.133	A02	9	sp|P63010|AP2B1_HUMAN
31	20867	LLLDVPTAAVQA	LLLDVPTAAVQA/2	673.129	A02	12	sp|P13284|GILT_HUMAN
21	14117	RLQESVMEA	RLQESVM[147]EA/2	672.238	A02	9	sp|O60216|RAD21_HUMAN
21	14102	YLLTHPPPIM	YLLTHPPPIM[147]/2	671.524	A02	10	sp|Q7Z6Z7|HUWE1_HUMAN
30	20139	NLYPFVKTV	NLYPFVKTV/2	671.3	A02	9	sp|P31939|PUR9_HUMAN
26	17424	GLWGQSVPTA	GLWGQSVPTA/2	670.154	A02	10	sp|Q9UBN6|TR10D_HUMAN
18	11953	YIFPLDDKAAV	YIFPLDDKAAV/2	664.056	A02	11	sp|Q9UKK3|PARP4_HUMAN
11	7301	ALLKGLAAV	ALLKGLAAV/2	663.727	A02	9	sp|Q9P2H5|UBP35_HUMAN
10	6589	LLIENVASL	LLIENVASL/2	658.9	A02	9	sp|P07203|GPX1_HUMAN
22	14480	HLLPTAPTTV	HLLPTAPTTV/2	658.182	A02	10	sp|Q6VMQ6|MCAF1_HUMAN
30	19740	ALIEAEKVAQV	ALIEAEKVAQV/2	658	A02	11	sp|O94905|ERLN2_HUMAN
17	11106	GLAKAVASV	GLAKAVASV/2	653.294	A02	9	sp|P57678|GEMI4_HUMAN
32	20836	GLADASLLKKV	GLADASLLKKV/2	651.125	A02	11	sp|Q9UBB4|ATX10_HUMAN
24	15534	KLVNILVQL	KLVNILVQL/2	647.25	A02	9	sp|Q9NR09|BIRC6_HUMAN
30	19380	GLLDPGMLVNI	GLLDPGM[147]LVNI/2	646	A02	11	sp|P49116|NR2C2_HUMAN
34	21902	ILTDITKGV	ILTDITKGV/2	644.176	A02	9	sp|P13639|EF2_HUMAN
25	16070	AILDVVVNL	AILDVVVNL/2	642.8	A02	9	sp|P48380|RFX3_HUMAN
21	13463	SIIGRLLEV	SIIGRLLEV/2	641.095	A02	9	sp|P62136|PP1A_HUMAN
7	4471	FLANIGTSV	FLANIGTSV/2	638.714	A02	9	sp|Q9UKG1|DP13A_HUMAN
27	17166	ALITTILHL	ALITTILHL/2	635.778	A02	9	sp|Q6R327|RICTR_HUMAN
29	18401	GLAPPQHLIRV	GLAPPQHLIRV/3	634.517	A02	11	sp|P04637|P53_HUMAN
26	16489	ALLETVNRL	ALLETVNRL/2	634.192	A02	9	sp|Q8IWJ2|GCC2_HUMAN
26	16454	SLFPGQVVI	SLFPGQVVI/2	632.846	A02	9	sp|Q14181|DPOA2_HUMAN
21	13287	TLFPGKVHSL	TLFPGKVHSL/3	632.714	A02	10	sp|Q9NNW5|WDR6_HUMAN
32	20163	LMTKEISSV	LM[147]TKEISSV/2	630.094	A02	9	sp|P78527|PRKDC_HUMAN
22	13797	ALAPGLPTA	ALAPGLPTA/2	627.136	A02	9	sp|Q9UMX5|NENF_HUMAN
3	1878	VLWDRTFSL	VLWDRTFSL/2	626	A02	9	sp|P42224|STAT1_HUMAN
16	10004	RLSSVNAEV	RLSSVNAEV/2	625.25	A02	9	sp|Q14246|EMR1_HUMAN
34	21169	TMAKESSIIGV	TM[147]AKESSIIGV/2	622.618	A02	11	sp|Q08257|QOR_HUMAN
35	21739	VLYDQPRHV	VLYDQPRHV/3	621.114	A02	9	sp|Q93074|MED12_HUMAN
31	19211	VLFLGELYL	VLFLGELYL/2	619.71	A02	9	sp|Q9H074|PAIP1_HUMAN
37	22889	VLTGILEQV	VLTGILEQV/2	618.622	A02	9	sp|Q96QK1|VPS35_HUMAN
19	11746	ALSGHVSTV	ALSGHVSTV/2	618.211	A02	9	sp|Q9Y283|INVS_HUMAN
24	14783	RLYHITDQV	RLYHITDQV/3	615.958	A02	9	sp|Q9NY97|B3GN2_HUMAN
24	14776	SLWHLPLLL	SLWHLPLLL/2	615.667	A02	9	sp|Q12887|COX10_HUMAN
23	14142	FLDESRSTQYM	FLDESRSTQYM[147]/2	614.87	A02	11	sp|Q9Y230|RUVB2_HUMAN
32	19615	FLASESLIKQI	FLASESLIKQI/2	612.969	A02	11	sp|P62906|RL10A_HUMAN
3	1828	FLWPGLNVPL	FLWPGLNVPL/2	609.333	A02	10	sp|P82675|RT05_HUMAN
26	15734	RLHDENILL	RLHDENILL/2	605.154	A02	9	sp|Q68CZ1|FTM_HUMAN
36	21754	GLMQEKIYI	GLM[147]QEKIYI/2	604.278	A02	9	sp|P26358|DNMT1_HUMAN
34	20459	VLMTEDIKL	VLM[147]TEDIKL/2	601.735	A02	9	sp|Q04637|IF4G1_HUMAN
26	15593	ALFEGKVQL	ALFEGKVQL/2	599.731	A02	9	sp|Q8NEZ3|WDR19_HUMAN
25	14967	VMIAGKVAVV	VM[147]IAGKVAVV/2	598.68	A02	10	sp|P23526|SAHH_HUMAN
32	19072	KIQEILTQV	KIQEILTQV/2	596	A02	9	sp|O00425|IF2B3_HUMAN
28	16618	ILAPLAWDL	ILAPLAWDL/2	593.5	A02	9	sp|Q8IXM6|NRM_HUMAN
37	21955	LLANIVPIA	LLANIVPIA/2	593.378	A02	9	sp|P03901|NU4LM_HUMAN
19	11271	LLLPGELAKHAV	LLLPGELAKHAV/3	593.211	A02	12	sp|P33778|H2B1B_HUMAN
25	14554	ALIEGVGILL	ALIEGVGILL/2	582.16	A02	10	sp|O60830|TI17B_HUMAN
37	21490	IQDKCVPLV	IQDKCVPLV/2	580.811	A02	9	sp|Q9BS26|ERP44_HUMAN
38	22054	TMIEICEKL	TM[147]IEICEKL/2	580.368	A02	9	sp|P50579|MAP2_HUMAN
7	4051	ILAAHVPTL	ILAAHVPTL/2	578.714	A02	9	sp|P30049|ATPD_HUMAN
24	13879	ALHDHLATI	ALHDHLATI/2	578.292	A02	9	sp|Q02153|GCYB1_HUMAN
34	19634	YLGIVELLV	YLGIVELLV/2	577.471	A02	9	sp|P25963|IKBA_HUMAN
28	16147	QLLQHVQAV	QLLQHVQAV/2	576.679	A02	9	sp|Q86Y56|HEAT2_HUMAN
26	14952	RLVPSVNGV	RLVPSVNGV/2	575.077	A02	9	sp|P11586|C1TC_HUMAN
37	21214	ILISKLLGA	ILISKLLGA/2	573.351	A02	9	sp|Q9NYK1|TLR7_HUMAN
34	19451	GLDALKVTV	GLDALKVTV/2	572.088	A02	9	sp|P52789|HXK2_HUMAN
31	17734	KLGEIVTTI	KLGEIVTTI/2	572.065	A02	9	sp|P84077|ARF1_HUMAN
10	5716	FLLFASSTLTL	FLLFASSTLTL/2	571.6	A02	11	reverse_sp|O75072|FKTN_HUMAN
15	8573	FLAEDPKVTL	FLAEDPKVTL/2	571.533	A02	10	sp|Q9HC16|ABC3G_HUMAN
37	20971	QLSTVITQV	QLSTVITQV/2	566.784	A02	9	sp|Q13535|ATR_HUMAN
32	18135	LLPAIVEL	LLPAIVEL/2	566.719	A02	8	sp|P30153|2AAA_HUMAN
31	17563	GLTSAIQAV	GLTSAIQAV/2	566.548	A02	9	sp|Q9Y692|GMEB1_HUMAN
32	18097	RLQEDPPVGV	RLQEDPPVGV/2	565.531	A02	10	sp|P63146|UBE2B_HUMAN
8	4523	FLAEHPNVTL	FLAEHPNVTL/2	565.375	A02	10	sp|Q96AK3|ABC3D_HUMAN
38	21473	ALCPRLWDV	ALCPRLWDV/2	565.079	A02	9	sp|Q9NUJ7|PLCX1_HUMAN
33	18638	LLPEGPPAI	LLPEGPPAI/2	564.788	A02	9	sp|Q15011|HERP1_HUMAN
19	10722	SLAQYNPKL	SLAQYNPKL/2	564.316	A02	9	sp|Q92569|P55G_HUMAN
24	13475	RLFPGAPPTA	RLFPGAPPTA/2	561.458	A02	10	sp|P17535|JUND_HUMAN
20	11111	SLYGGTITI	SLYGGTITI/2	555.55	A02	9	sp|Q5VTR2|BRE1A_HUMAN
11	6104	RVADRLYGV	RVADRLYGV/2	554.909	A02	9	sp|O95219|SNX4_HUMAN
39	21614	SLTGRLDEV	SLTGRLDEV/2	554.205	A02	9	sp|P42226|STAT6_HUMAN
26	14409	KLLDPEDVAVQL	KLLDPEDVAVQL/2	554.192	A02	12	sp|P46939|UTRO_HUMAN
25	13824	SLLPPDALVGL	SLLPPDALVGL/2	552.96	A02	11	sp|Q15437|SC23B_HUMAN
30	16471	ALFPAPLAQI	ALFPAPLAQI/2	549.033	A02	10	sp|Q8ND24|RN214_HUMAN
31	16983	NLFNKYPAL	NLFNKYPAL/2	547.839	A02	9	sp|P13797|PLST_HUMAN
41	22453	TLVEDCVKV	TLVEDCVKV/2	547.634	A02	9	sp|Q13315|ATM_HUMAN
8	4375	YLQNWSHVL	YLQNWSHVL/2	546.875	A02	9	sp|Q13098|CSN1_HUMAN
33	17996	GLLGTLVQL	GLLGTLVQL/2	545.333	A02	9	sp|P35222|CTNB1_HUMAN
30	16312	TLFPVRLLV	TLFPVRLLV/2	543.733	A02	9	sp|Q8NF37|PCAT1_HUMAN
39	21180	ALTELLAKI	ALTELLAKI/2	543.077	A02	9	sp|P30279|CCND2_HUMAN
30	16143	ALAGHQDGITFI	ALAGHQDGITFI/2	538.1	A02	12	sp|Q8TEB1|DCA11_HUMAN
18	9676	ALFKAWAL	ALFKAWAL/2	537.556	A02	8	sp|Q15306|IRF4_HUMAN
28	15017	ALFARPDLLLL	ALFARPDLLLL/2	536.321	A02	11	sp|Q9NUQ8|ABCF3_HUMAN
45	24124	FLKNELDNV	FLKNELDNV/2	536.089	A02	9	sp|Q9BWF2|TRAIP_HUMAN
40	21417	GQFPSYLETV	GQFPSYLETV/2	535.425	A02	10	sp|Q86Y56|HEAT2_HUMAN
26	13911	KTLERSYLL	KTLERSYLL/2	535.038	A02	9	sp|P23921|RIR1_HUMAN
37	19785	ILDVTVVYL	ILDVTVVYL/2	534.73	A02	9	sp|P41002|CCNF_HUMAN
35	18698	QLSPRLLEV	QLSPRLLEV/2	534.229	A02	9	sp|Q460N5|PAR14_HUMAN
34	18127	YLILHLIST	YLILHLIST/2	533.147	A02	9	sp|Q9BTE3|MCMBP_HUMAN
35	18591	ALWNEEALL	ALWNEEALL/2	531.171	A02	9	sp|Q14739|LBR_HUMAN
24	12745	SLDPHAQVAV	SLDPHAQVAV/2	531.042	A02	10	sp|P35573|GDE_HUMAN
42	22195	KLLEGEECRI	KLLEGEECRI/2	528.452	A02	10	sp|P12036|NFH_HUMAN
13	6858	ALLPSSPTL	ALLPSSPTL/2	527.538	A02	9	sp|Q92994|TF3B_HUMAN
34	17839	GLCERLVSL	GLCERLVSL/2	524.676	A02	9	sp|P78527|PRKDC_HUMAN
30	15698	SLWPSPEQL	SLWPSPEQL/2	523.267	A02	9	sp|Q8TAE8|G45IP_HUMAN
21	10987	LLLEPGSLYIL	LLLEPGSLYIL/2	523.19	A02	11	sp|Q9BT30|ALKB7_HUMAN
36	18805	RLLDLENIQI	RLLDLENIQI/2	522.361	A02	10	sp|Q92556|ELMO1_HUMAN
28	14407	VLADLKVQL	VLADLKVQL/2	514.536	A02	9	sp|Q9NQP4|PFD4_HUMAN
40	20512	VLSSRLAFA	VLSSRLAFA/2	512.8	A02	9	sp|P79483|DRB3_HUMAN
5	2555	SLMSHAIEL	SLM[147]SHAIEL/2	511	A02	9	sp|Q9Y263|PLAP_HUMAN
18	9096	KLHDINAQL	KLHDINAQL/2	505.333	A02	9	sp|Q10567|AP1B1_HUMAN
12	6055	KLLEGEESRISL	KLLEGEESRISL/2	504.583	A02	12	sp|P08670|VIME_HUMAN
41	20640	GLAKLIADV	GLAKLIADV/2	503.415	A02	9	sp|P39748|FEN1_HUMAN
35	17586	GIVEGLMTTV	GIVEGLM[147]TTV/2	502.457	A02	10	sp|P04406|G3P_HUMAN
39	19574	SMTLAIHEI	SM[147]TLAIHEI/2	501.897	A02	9	sp|O15121|DEGS1_HUMAN
10	5011	ALYHFNHSL	ALYHFNHSL/3	501.1	A02	9	sp|Q5T4S7|UBR4_HUMAN
39	19539	LIFDLGGGTFDV	LIFDLGGGTFDV/2	501	A02	12	sp|P34931|HS71L_HUMAN
37	18336	SLLPVKPVEI	SLLPVKPVEI/2	495.568	A02	10	sp|Q01831|XPC_HUMAN
23	11369	SLWKEVSEL	SLWKEVSEL/2	494.304	A02	9	sp|Q03933|HSF2_HUMAN
30	14805	FLEEREIAL	FLEEREIAL/2	493.5	A02	9	sp|O14980|XPO1_HUMAN
41	20201	ALFQRPPLI	ALFQRPPLI/2	492.707	A02	9	sp|O60832|DKC1_HUMAN
44	21531	TLNNLEIFL	TLNNLEIFL/2	489.341	A02	9	sp|P52701|MSH6_HUMAN
19	9226	SLFPAELAL	SLFPAELAL/2	485.579	A02	9	sp|Q8WWH5|TRUB1_HUMAN
34	16505	RLQEDPPAGV	RLQEDPPAGV/2	485.441	A02	10	sp|P49459|UBE2A_HUMAN
25	12013	ALLSAVTRL	ALLSAVTRL/2	480.52	A02	9	sp|P35221|CTNA1_HUMAN
12	5763	LLWPGAALL	LLWPGAALL/2	480.25	A02	9	sp|Q9GZY6|NTAL_HUMAN
30	14386	NLFNRYPAL	NLFNRYPAL/2	479.533	A02	9	sp|P13796|PLSL_HUMAN
40	19180	YIYDKDMEII	YIYDKDM[147]EII/2	479.5	A02	10	sp|Q9UPT9|UBP22_HUMAN
43	20569	GLWGPEEEPHL	GLWGPEEEPHL/2	478.349	A02	11	sp|Q5JSZ5|PRC2B_HUMAN
28	13245	ALFEAAREVTL	ALFEAAREVTL/2	473.036	A02	11	sp|P42858|HD_HUMAN
45	21278	RLFDEPQLA	RLFDEPQLA/2	472.844	A02	9	sp|Q9H0C5|BTBD1_HUMAN
14	6603	RLWPKIQGL	RLWPKIQGL/2	471.643	A02	9	sp|Q9NX09|DDIT4_HUMAN
29	13581	ALSPINIQL	ALSPINIQL/2	468.31	A02	9	sp|O95876|FRITZ_HUMAN
34	15797	RMFDGKFVVA	RMFDGKFVVA/2	464.618	A02	10	sp|Q8TAS1|UHMK1_HUMAN
41	19025	VLGPKIEAV	VLGPKIEAV/2	464.024	A02	9	sp|Q7Z4V5|HDGR2_HUMAN
26	11984	GLWEDGRSTLL	GLWEDGRSTLL/2	460.923	A02	11	sp|Q96BA8|CR3L1_HUMAN
7	3212	IVMEHVVFL	IVM[147]EHVVFL/2	458.857	A02	9	sp|Q75V66|ANO5_HUMAN
39	17870	GLSQVAVTV	GLSQVAVTV/2	458.205	A02	9	sp|Q96II8|LRCH3_HUMAN
24	10951	VLFEGRTVQL	VLFEGRTVQL/2	456.292	A02	10	sp|Q9UPW5|CBPC1_HUMAN
38	17143	VLADQEVRL	VLADQEVRL/2	451.132	A02	9	sp|O43566|RGS14_HUMAN
12	5411	ALLDHDLAL	ALLDHDLAL/2	450.917	A02	9	sp|Q8NI27|THOC2_HUMAN
6	2701	RLLEATSYL	RLLEATSYL/2	450.167	A02	9	sp|O60341|KDM1A_HUMAN
45	20059	GLTSTDLLFHL	GLTSTDLLFHL/2	445.756	A02	11	sp|Q14181|DPOA2_HUMAN
42	18714	HLLDFPNIVI	HLLDFPNIVI/2	445.571	A02	10	sp|Q6P2Q9|PRP8_HUMAN
42	18536	QLSEVFIQL	QLSEVFIQL/2	441.333	A02	9	sp|P51531|SMCA2_HUMAN
23	10128	FLHETGGAMV	FLHETGGAM[147]V/2	440.348	A02	10	sp|Q8IVB4|SL9A9_HUMAN
43	18763	VIWGTDVNV	VIWGTDVNV/2	436.349	A02	9	sp|P33991|MCM4_HUMAN
8	3488	RLQEVTHSV	RLQEVTHSV/2	436	A02	9	sp|P26010|ITB7_HUMAN
41	17859	HLLNESPML	HLLNESPM[147]L/2	435.585	A02	9	sp|Q92621|NU205_HUMAN
20	8693	SLIGHLQTL	SLIGHLQTL/2	434.65	A02	9	sp|Q16690|DUS5_HUMAN
28	12165	FVFPGELLL	FVFPGELLL/2	434.464	A02	9	sp|Q15758|AAAT_HUMAN
27	11688	ALSPHNILL	ALSPHNILL/2	432.889	A02	9	sp|Q8TEA7|TBCK_HUMAN
43	18604	GLAPKPVQV	GLAPKPVQV/2	432.651	A02	9	sp|Q6ZNJ1|NBEL2_HUMAN
20	8598	FIIQGLRSV	FIIQGLRSV/2	429.9	A02	9	sp|P01906|DQA2_HUMAN
42	17991	KLTEVHEEL	KLTEVHEEL/2	428.357	A02	9	sp|Q9UJC3|HOOK1_HUMAN
38	16275	RLFEVPHELVA	RLFEVPHELVA/3	428.289	A02	11	sp|Q9Y3M8|STA13_HUMAN
22	9305	ALYPGQLVQL	ALYPGQLVQL/2	422.955	A02	10	sp|Q9BRR9|RHG09_HUMAN
37	15603	GLVDKLQAL	GLVDKLQAL/2	421.703	A02	9	sp|Q6FI81|CPIN1_HUMAN
36	15142	FLLGPRLVLA	FLLGPRLVLA/2	420.611	A02	10	sp|P49755|TMEDA_HUMAN
39	16391	KIWDLKERTNV	KIWDLKERTNV/3	420.282	A02	11	sp|Q9UMS4|PRP19_HUMAN
49	20531	TLLVVVPKL	TLLVVVPKL/2	419	A02	9	sp|P21283|VATC1_HUMAN
34	14191	ALAAALAHI	ALAAALAHI/2	417.382	A02	9	sp|Q9NR30|DDX21_HUMAN
45	18766	SLWGQPAEA	SLWGQPAEA/2	417.022	A02	9	sp|P29400|CO4A5_HUMAN
45	18714	YLDIKGLLDV	YLDIKGLLDV/2	415.867	A02	10	sp|P63208|SKP1_HUMAN
52	21484	LLFEGEKITI	LLFEGEKITI/2	413.154	A02	10	sp|Q9GZM3|RPB1B_HUMAN
31	12796	GLLGAGGTVSV	GLLGAGGTVSV/2	412.774	A02	11	sp|Q3ZCQ8|TIM50_HUMAN
42	17113	RLLEDKKITV	RLLEDKKITV/3	407.452	A02	10	sp|Q9UDY8|MALT1_HUMAN
46	18613	GLDPLGYEIQL	GLDPLGYEIQL/2	404.63	A02	11	sp|P57740|NU107_HUMAN
24	9682	RLAGADVVLGV	RLAGADVVLGV/2	403.417	A02	11	sp|P27708|PYR1_HUMAN
17	6851	RLIPTLVSI	RLIPTLVSI/2	403	A02	9	sp|Q96P70|IPO9_HUMAN
56	22538	HLYSEVKEV	HLYSEVKEV/2	402.464	A02	9	sp|Q7Z333|SETX_HUMAN
31	12392	RLWGEPVNL	RLWGEPVNL/2	399.742	A02	9	sp|Q93008|USP9X_HUMAN
35	13971	ALYGQPLLL	ALYGQPLLL/2	399.171	A02	9	sp|Q13107|UBP4_HUMAN
48	19122	TLLEEIKAL	TLLEEIKAL/2	398.375	A02	9	sp|Q6QEF8|CORO6_HUMAN
21	8341	KLAENIDAQL	KLAENIDAQL/2	397.19	A02	10	sp|P37198|NUP62_HUMAN
29	11469	HIIENIVAV	HIIENIVAV/2	395.483	A02	9	sp|O76021|RL1D1_HUMAN
35	13734	RLIEETQIFQM	RLIEETQIFQM[147]/2	392.4	A02	11	sp|Q68D86|C102B_HUMAN
50	19502	LLYVNVIGL	LLYVNVIGL/2	390.04	A02	9	sp|Q4J6C6|PPCEL_HUMAN
15	5834	KLIAQNLEL	KLIAQNLEL/2	388.933	A02	9	sp|P52732|KIF11_HUMAN
47	18215	ALYHLAIKL	ALYHLAIKL/2	387.553	A02	9	sp|Q9UKA4|AKA11_HUMAN
52	20142	SILEDPPSI	SILEDPPSI/2	387.346	A02	9	sp|Q9NVM9|ASUN_HUMAN
44	17018	RLPDDDPTAV	RLPDDDPTAV/2	386.773	A02	10	sp|Q9UBF2|COPG2_HUMAN
55	21076	LLFPQIEGIKI	LLFPQIEGIKI/2	383.2	A02	11	sp|Q8NEZ5|FBX22_HUMAN
46	17626	LLQEVEHQL	LLQEVEHQL/2	383.174	A02	9	sp|O94972|TRI37_HUMAN
38	14444	ALLAGSEYLKL	ALLAGSEYLKL/2	380.105	A02	11	sp|O15371|EIF3D_HUMAN
19	7200	SLLPPTALVGL	SLLPPTALVGL/2	378.947	A02	11	sp|Q15436|SC23A_HUMAN
61	23000	LLPAIVHI	LLPAIVHI/2	377.049	A02	8	sp|Q92841|DDX17_HUMAN
24	8982	KLTDVGIATL	KLTDVGIATL/2	374.25	A02	10	sp|Q86TB3|ALPK2_HUMAN
21	7826	GLAAGGIVAV	GLAAGGIVAV/2	372.667	A02	10	sp|Q9ULH7|MKL2_HUMAN
57	21240	ILGIQPPSV	ILGIQPPSV/2	372.632	A02	9	sp|Q9UPN6|SCAF8_HUMAN
46	17141	KLFIGGLNV	KLFIGGLNV/2	372.63	A02	9	sp|Q13151|ROA0_HUMAN
24	8936	ILAQQPLSV	ILAQQPLSV/2	372.333	A02	9	sp|Q6ZRI6|CO039_HUMAN
54	19946	HLVDFDCHL	HLVDFDCHL/2	369.37	A02	9	sp|Q9Y3B6|EMC9_HUMAN
62	22847	VINDECYQV	VINDECYQV/2	368.5	A02	9	sp|Q29RF7|PDS5A_HUMAN
54	19893	GLLTEIRAV	GLLTEIRAV/2	368.389	A02	9	sp|Q9UEE5|ST17A_HUMAN
45	16552	FAMTDVLDV	FAMTDVLDV/2	367.822	A02	9	reverse_sp|Q8WZ42|TITIN_HUMAN
42	15399	FALPVGLIVGV	FALPVGLIVGV/2	366.643	A02	11	sp|P20333|TNR1B_HUMAN
49	17938	GLLPEPNILQL	GLLPEPNILQL/2	366.082	A02	11	sp|Q8IY67|RAVR1_HUMAN
17	6215	ALAQRLLEV	ALAQRLLEV/2	365.588	A02	9	sp|Q6ZMZ3|SYNE3_HUMAN
63	22936	ILDKKVEKV	ILDKKVEKV/2	364.063	A02	9	sp|Q58FF7|H90B3_HUMAN
61	22143	TLTEEGVIKV	TLTEEGVIKV/2	363	A02	10	sp|Q9BZE4|NOG1_HUMAN
52	18697	KISEVVELL	KISEVVELL/2	359.558	A02	9	sp|P52701|MSH6_HUMAN
42	15087	ALADLQEAVKL	ALADLQEAVKL/2	359.214	A02	11	sp|Q9C0D5|TANC1_HUMAN
44	15677	ALLQQVHSA	ALLQQVHSA/2	356.295	A02	9	sp|Q86XN7|PRSR1_HUMAN
22	7828	RLVDLLLVL	RLVDLLLVL/2	355.818	A02	9	sp|Q9ULT8|HECD1_HUMAN
40	14189	NLANVVLLL	NLANVVLLL/2	354.725	A02	9	sp|Q92620|PRP16_HUMAN
45	15902	ALSSLAVVV	ALSSLAVVV/2	353.378	A02	9	sp|Q5VW36|FOCAD_HUMAN
22	7634	FIYPSNMQTML	FIYPSNM[147]QTM[147]L/2	347	A02	11	sp|Q7Z417|NUFP2_HUMAN
46	15946	FLWKEPATM	FLWKEPATM[147]/2	346.652	A02	9	sp|Q9BQ70|TCF25_HUMAN
60	20781	FLFQEPRSI	FLFQEPRSI/2	346.35	A02	9	sp|Q9UK61|F208A_HUMAN
16	5539	VLIGSNHSL	VLIGSNHSL/2	346.188	A02	9	sp|O15027|SC16A_HUMAN
64	21941	GLDDIKDLKV	GLDDIKDLKV/2	342.828	A02	10	sp|Q9HCE1|MOV10_HUMAN
37	12539	SIIQRLLEV	SIIQRLLEV/2	338.892	A02	9	sp|P36873|PP1G_HUMAN
65	22003	NMVAKVDEV	NM[147]VAKVDEV/2	338.508	A02	9	sp|P62906|RL10A_HUMAN
38	12853	RLLHEVQEL	RLLHEVQEL/2	338.237	A02	9	sp|Q13561|DCTN2_HUMAN
7	2359	MLLPGPLHSL	M[147]LLPGPLHSL/2	337	A02	10	sp|Q8WXH0|SYNE2_HUMAN
61	20434	TLYNTEVLL	TLYNTEVLL/2	334.984	A02	9	sp|Q01543|FLI1_HUMAN
39	12955	LLDATQHTL	LLDATQHTL/2	332.179	A02	9	sp|Q15027|ACAP1_HUMAN
58	19257	GILTKELLHSV	GILTKELLHSV/3	332.017	A02	11	sp|Q9Y217|MTMR6_HUMAN
48	15909	SLSPIYPAA	SLSPIYPAA/2	331.438	A02	9	sp|P18858|DNLI1_HUMAN
57	18825	TLSEIKALL	TLSEIKALL/2	330.263	A02	9	sp|P12814|ACTN1_HUMAN
39	12865	TVLPFVSTV	TVLPFVSTV/2	329.872	A02	9	sp|P26010|ITB7_HUMAN
39	12847	FLRNINEYL	FLRNINEYL/2	329.41	A02	9	sp|Q96CU9|FXRD1_HUMAN
42	13704	KLGEFAKVLEL	KLGEFAKVLEL/2	326.286	A02	11	sp|P30153|2AAA_HUMAN
48	15623	TLSEVTNQL	TLSEVTNQL/2	325.479	A02	9	sp|Q9H0K1|SIK2_HUMAN
62	20035	GLTDIRTLV	GLTDIRTLV/2	323.145	A02	9	sp|Q15751|HERC1_HUMAN
65	20952	ALLSRLEQI	ALLSRLEQI/2	322.338	A02	9	sp|Q9UKM9|RALY_HUMAN
53	16969	GLLNRPNPLL	GLLNRPNPLL/2	320.17	A02	10	sp|Q96AD5|PLPL2_HUMAN
62	19829	GLIRFPLMTI	GLIRFPLM[147]TI/2	319.823	A02	10	sp|Q9BX70|BTBD2_HUMAN
15	4775	KVWGNVVTV	KVWGNVVTV/2	318.333	A02	9	sp|O43390|HNRPR_HUMAN
63	19918	KLGLKPLEV	KLGLKPLEV/2	316.159	A02	9	sp|O43290|SNUT1_HUMAN
53	16444	LLIDDKGTIKL	LLIDDKGTIKL/3	310.264	A02	11	sp|P06493|CDK1_HUMAN
66	19951	GLAPHLEQI	GLAPHLEQI/2	302.288	A02	9	sp|Q8TEX9|IPO4_HUMAN
43	12982	ALIEGAGILL	ALIEGAGILL/2	301.907	A02	10	sp|Q99595|TI17A_HUMAN
65	19547	GLDRNAPSV	GLDRNAPSV/2	300.723	A02	9	sp|Q12996|CSTF3_HUMAN
22	6530	LLSSVSIAL	LLSSVSIAL/2	296.818	A02	9	sp|Q15042|RB3GP_HUMAN
60	17755	VLSNVEVTL	VLSNVEVTL/2	295.917	A02	9	sp|Q14204|DYHC1_HUMAN
58	17101	ALKDFVASI	ALKDFVASI/2	294.845	A02	9	sp|P25205|MCM3_HUMAN
13	3817	KLMNVDPDSVVL	KLM[147]NVDPDSVVL/2	293.615	A02	12	sp|O75293|GA45B_HUMAN
44	12901	ALTSVVVTL	ALTSVVVTL/2	293.205	A02	9	sp|Q00534|CDK6_HUMAN
37	10832	ALTPVVVTL	ALTPVVVTL/2	292.757	A02	9	sp|P11802|CDK4_HUMAN
50	14560	AALPNVYEV	AALPNVYEV/2	291.2	A02	9	sp|P33992|MCM5_HUMAN
17	4936	HLLHTVPAL	HLLHTVPAL/2	290.353	A02	9	sp|Q9Y4B6|VPRBP_HUMAN
74	20717	ITTDVLYTI	ITTDVLYTI/2	279.959	A02	9	sp|P14866|HNRPL_HUMAN
4	1117	FLLDHGASL	FLLDHGASL/2	279.25	A02	9	sp|Q12955|ANK3_HUMAN
71	19788	VLIANLEKL	VLIANLEKL/2	278.704	A02	9	sp|Q6WRX3|ZY11A_HUMAN
67	18633	SLIAKVATA	SLIAKVATA/2	278.104	A02	9	sp|Q92526|TCPW_HUMAN
59	16387	YLGNINPQM	YLGNINPQM[147]/2	277.746	A02	9	sp|O15042|SR140_HUMAN
29	8039	RLLPDTINSINL	RLLPDTINSINL/2	277.207	A02	12	sp|Q14008|CKAP5_HUMAN
60	16607	TVYGGVMYI	TVYGGVM[147]YI/2	276.783	A02	9	sp|Q9P2N7|KLH13_HUMAN
66	18009	RLGEAEGLMKV	RLGEAEGLM[147]KV/3	272.864	A02	11	sp|Q9HBR0|S38AA_HUMAN
19	5183	RLINQVLEL	RLINQVLEL/2	272.789	A02	9	sp|Q9UIL1|SCOC_HUMAN
55	14966	YLSHNGIEVI	YLSHNGIEVI/2	272.109	A02	10	sp|Q15435|PP1R7_HUMAN
34	9247	FILPDSLPLDTL	FILPDSLPLDTL/2	271.971	A02	12	sp|P62314|SMD1_HUMAN
44	11946	YLSLLNQQL	YLSLLNQQL/2	271.5	A02	9	sp|O75643|U520_HUMAN
76	20472	QLLTAIVKL	QLLTAIVKL/2	269.368	A02	9	sp|Q10567|AP1B1_HUMAN
34	9140	TLVDNISTMAL	TLVDNISTM[147]AL/2	268.824	A02	11	sp|Q9NPJ3|ACO13_HUMAN
84	22325	NLISALEEA	NLISALEEA/2	265.774	A02	9	sp|P22102|PUR2_HUMAN
69	18157	VLTGLSIRL	VLTGLSIRL/2	263.145	A02	9	sp|Q6SPF0|SAMD1_HUMAN
48	12620	ALYSKGILL	ALYSKGILL/2	262.917	A02	9	sp|O75694|NU155_HUMAN
62	16222	LLGELPRLLLL	LLGELPRLLLL/2	261.645	A02	11	sp|P08174|DAF_HUMAN
34	8784	AIIPYFITL	AIIPYFITL/2	258.353	A02	9	sp|Q09470|KCNA1_HUMAN
88	22151	TLISELVQA	TLISELVQA/2	251.716	A02	9	sp|Q14999|CUL7_HUMAN
33	8305	RLLEQKVEL	RLLEQKVEL/3	251.667	A02	9	sp|Q9H307|PININ_HUMAN
72	18058	ALEPIDITV	ALEPIDITV/2	250.806	A02	9	sp|O60216|RAD21_HUMAN
86	21351	TLIEELKTL	TLIEELKTL/2	248.267	A02	9	sp|P18846|ATF1_HUMAN
50	12372	RVIGTLEEV	RVIGTLEEV/2	247.44	A02	9	sp|P46060|RAGP1_HUMAN
14	3461	MLAWINESL	M[147]LAWINESL/2	247.214	A02	9	sp|Q15691|MARE1_HUMAN
14	3419	ALFQHITAL	ALFQHITAL/2	244.214	A02	9	sp|Q9P055|JKAMP_HUMAN
15	3661	AMAASPHAV	AM[147]AASPHAV/2	244.067	A02	9	sp|Q13151|ROA0_HUMAN
40	9756	KIMTEKELLAV	KIM[147]TEKELLAV/3	243.9	A02	11	sp|Q14254|FLOT2_HUMAN
47	11457	LLYQEGAKMAV	LLYQEGAKM[147]AV/2	243.766	A02	11	sp|P14923|PLAK_HUMAN
9	2186	FLLPLRIAL	FLLPLRIAL/2	242.889	A02	9	sp|Q86UL3|GPAT4_HUMAN
25	6012	KMNESTRSV	KM[147]NESTRSV/2	240.48	A02	9	sp|P33991|MCM4_HUMAN
85	20369	GLLGQEGLVEI	GLLGQEGLVEI/2	239.635	A02	11	sp|Q53GL7|PAR10_HUMAN
56	13385	ALIPIPLAVI	ALIPIPLAVI/2	239.018	A02	10	sp|P19256|LFA3_HUMAN
82	19597	QLDDLKVEL	QLDDLKVEL/2	238.988	A02	9	sp|P42766|RL35_HUMAN
38	9050	RLLDRKVLL	RLLDRKVLL/2	238.158	A02	9	sp|Q9H4A5|GLP3L_HUMAN
32	7579	ALAWLDVTL	ALAWLDVTL/2	236.844	A02	9	sp|Q6P9H5|GIMA6_HUMAN
52	12232	KLWDPRTPCNA	KLWDPRTPCNA/3	235.231	A02	11	sp|O43684|BUB3_HUMAN
48	11214	KLNVAPLAV	KLNVAPLAV/2	233.625	A02	9	sp|Q6P582|MZT2A_HUMAN
40	9335	YLWQGVRVA	YLWQGVRVA/2	233.375	A02	9	sp|Q13144|EI2BE_HUMAN
34	7913	KLFQGQLVL	KLFQGQLVL/2	232.735	A02	9	sp|O94782|UBP1_HUMAN
7	1621	FLAELPGSLSL	FLAELPGSLSL/2	231.571	A02	11	sp|Q9UPG8|PLAL2_HUMAN
85	19629	TIIDLPGITRV	TIIDLPGITRV/2	230.929	A02	11	sp|P20592|MX2_HUMAN
42	9672	ALDKATVLL	ALDKATVLL/2	230.286	A02	9	sp|Q53EL6|PDCD4_HUMAN
69	15815	KLAELKQECL	KLAELKQECL/2	229.203	A02	10	sp|P82979|SARNP_HUMAN
22	5008	VLMQDSRLYL	VLM[147]QDSRLYL/2	227.636	A02	10	sp|P06493|CDK1_HUMAN
82	18592	ALIRLDDLFL	ALIRLDDLFL/2	226.732	A02	10	sp|Q9NRX1|PNO1_HUMAN
86	19394	YLEELPEKLKL	YLEELPEKLKL/3	225.512	A02	11	sp|P09488|GSTM1_HUMAN
92	20712	GLISVDVRI	GLISVDVRI/2	225.13	A02	9	sp|Q12789|TF3C1_HUMAN
13	2902	RLWNETVEL	RLWNETVEL/2	223.231	A02	9	sp|Q8WUY9|DEP1B_HUMAN
37	8104	FAIDPHLLLSV	FAIDPHLLLSV/2	219.027	A02	11	sp|Q29RF7|PDS5A_HUMAN
83	18090	ALLSGLREA	ALLSGLREA/2	217.952	A02	9	sp|O60341|KDM1A_HUMAN
67	14537	AIVLVLHSV	AIVLVLHSV/2	216.97	A02	9	sp|Q96S82|UBL7_HUMAN
73	15742	AILKYIETL	AILKYIETL/2	215.644	A02	9	sp|O75122|CLAP2_HUMAN
45	9677	FTVPRVVAV	FTVPRVVAV/2	215.044	A02	9	sp|Q9Y4A5|TRRAP_HUMAN
45	9644	LLIGTDVSL	LLIGTDVSL/2	214.311	A02	9	sp|Q9Y4B6|VPRBP_HUMAN
25	5310	LLAPRPVAV	LLAPRPVAV/2	212.4	A02	9	sp|P49918|CDN1C_HUMAN
63	13229	GLKEGIPAL	GLKEGIPAL/2	209.984	A02	9	sp|P13639|EF2_HUMAN
81	16928	LLAPVVKEI	LLAPVVKEI/2	208.988	A02	9	sp|Q13576|IQGA2_HUMAN
42	8731	LLDVPTAAV	LLDVPTAAV/2	207.881	A02	9	sp|P13284|GILT_HUMAN
21	4258	KVLERVNAV	KVLERVNAV/2	202.762	A02	9	sp|Q9UL46|PSME2_HUMAN
55	11021	ALASVIKEL	ALASVIKEL/2	200.382	A02	9	sp|Q8WYA0|IFT81_HUMAN
83	16621	ALAKIEIKL	ALAKIEIKL/2	200.253	A02	9	sp|P0C7P4|UCRIL_HUMAN
97	19396	KMADEDALRKI	KM[147]ADEDALRKI/3	199.959	A02	11	sp|Q5VTR2|BRE1A_HUMAN
80	15920	ALVDQRELYL	ALVDQRELYL/2	199	A02	10	sp|Q9UL33|TPC2L_HUMAN
112	21872	ALCEENMRGV	ALCEENM[147]RGV/2	195.286	A02	10	sp|P13639|EF2_HUMAN
101	19553	GLVSRLLEA	GLVSRLLEA/2	193.594	A02	9	sp|Q99973|TEP1_HUMAN
118	22544	VLEYVIKV	VLEYVIKV/2	191.051	A02	8	sp|P43355|MAGA1_HUMAN
108	20450	LLGPPPVGV	LLGPPPVGV/2	189.352	A02	9	sp|Q9ULV3|CIZ1_HUMAN
120	22653	GLTEVLKEI	GLTEVLKEI/2	188.775	A02	9	sp|Q9H792|PEAK1_HUMAN
109	20478	IQDNHDGTYTV	IQDNHDGTYTV/2	187.872	A02	11	sp|P21333|FLNA_HUMAN
86	15944	ALSSVIKEL	ALSSVIKEL/2	185.395	A02	9	sp|Q08AG7|MZT1_HUMAN
55	10088	RLMQGDEICL	RLM[147]QGDEICL/2	183.418	A02	10	sp|Q92900|RENT1_HUMAN
77	14053	MIPAVVLLL	MIPAVVLLL/2	182.506	A02	9	sp|P30273|FCERG_HUMAN
51	9176	RLLKSKYLL	RLLKSKYLL/3	179.922	A02	9	reverse_sp|P10620|MGST1_HUMAN
8	1424	FLLPTGLSSL	FLLPTGLSSL/2	178	A02	10	sp|A9UHW6|MI4GD_HUMAN
95	16877	VLQQHLETL	VLQQHLETL/2	177.653	A02	9	sp|Q9NP66|HM20A_HUMAN
79	13956	ILLNVDGVEL	ILLNVDGVEL/2	176.658	A02	10	sp|Q8TBB1|LNX1_HUMAN
123	21056	AMLKEVCTA	AM[147]LKEVCTA/2	171.187	A02	9	sp|P61011|SRP54_HUMAN
101	17272	GLKNGVPAV	GLKNGVPAV/2	171.01	A02	9	sp|P53621|COPA_HUMAN
35	5982	KLYQTPLEL	KLYQTPLEL/2	170.914	A02	9	sp|P52948|NUP98_HUMAN
108	18292	RLQEKVESA	RLQEKVESA/2	169.37	A02	9	sp|Q09161|NCBP1_HUMAN
122	20189	QLTNVILHL	QLTNVILHL/2	165.484	A02	9	sp|Q9NQG6|MID51_HUMAN
99	16372	LLYSAFGVII	LLYSAFGVII/2	165.374	A02	10	sp|Q5SRD1|TI23B_HUMAN
49	8007	RLIQESPTL	RLIQESPTL/2	163.408	A02	9	sp|Q6P1A2|MBOA5_HUMAN
31	5052	SLAGSLRSV	SLAGSLRSV/2	162.968	A02	9	sp|Q8TE82|S3TC1_HUMAN
52	8147	HLAPVLVAA	HLAPVLVAA/2	156.673	A02	9	sp|Q15021|CND1_HUMAN
76	11681	SLDQPTQTV	SLDQPTQTV/2	153.697	A02	9	sp|Q99613|EIF3C_HUMAN
58	8898	SLAGDVALQQL	SLAGDVALQQL/2	153.414	A02	11	sp|Q15021|CND1_HUMAN
107	16410	GLDPNKPPEL	GLDPNKPPEL/2	153.364	A02	10	sp|Q9ULL5|PRR12_HUMAN
134	20528	FLDNGPKTI	FLDNGPKTI/2	153.194	A02	9	sp|P78344|IF4G2_HUMAN
86	13093	TLAEIAKVEL	TLAEIAKVEL/2	152.244	A02	10	sp|Q15233|NONO_HUMAN
14	2123	ALWAGLLTL	ALWAGLLTL/2	151.643	A02	9	sp|P06734|FCER2_HUMAN
67	10112	AVYEGHVSCV	AVYEGHVSCV/2	150.925	A02	10	sp|P58546|MTPN_HUMAN
56	8413	GLFQGKTPL	GLFQGKTPL/2	150.232	A02	9	sp|Q9ULW0|TPX2_HUMAN
136	20358	VLGGKAFLEHL	VLGGKAFLEHL/3	149.691	A02	11	sp|Q8TAP6|CEP76_HUMAN
24	3588	AIAPIIAAV	AIAPIIAAV/2	149.5	A02	9	sp|Q9BQ52|RNZ2_HUMAN
147	21548	ILGPKPQGV	ILGPKPQGV/2	146.585	A02	9	sp|Q8NHS3|MFSD8_HUMAN
109	15728	FVIRNIVEA	FVIRNIVEA/2	144.294	A02	9	sp|Q5JNZ5|RS26L_HUMAN
17	2453	SLAEGRLYL	SLAEGRLYL/2	144.294	A02	9	sp|Q7Z3E5|ARMC9_HUMAN
128	17909	ILHHKVYDL	ILHHKVYDL/2	139.914	A02	9	sp|P00167|CYB5_HUMAN
29	3934	SLIRSVVAL	SLIRSVVAL/2	135.655	A02	9	sp|P51665|PSMD7_HUMAN
24	3186	VMAPRTVLL	VM[147]APRTVLL/2	132.75	A02	9	sp|P01889|1B07_HUMAN
113	14945	ALLQSDVRL	ALLQSDVRL/2	132.257	A02	9	sp|Q15149|PLEC_HUMAN
69	9098	KLPTPTSSV	KLPTPTSSV/2	131.855	A02	9	sp|Q9BTA9|WAC_HUMAN
105	13786	LLPPVTLAA	LLPPVTLAA/2	131.295	A02	9	sp|Q15274|NADC_HUMAN
162	20967	YCAEIAHNV	YCAEIAHNV/2	129.426	A02	9	sp|P62910|RL32_HUMAN
132	16824	ILINDAGEVRL	ILINDAGEVRL/2	127.455	A02	11	sp|Q92918|M4K1_HUMAN
12	1523	YLLPSGGSVTL	YLLPSGGSVTL/2	126.917	A02	11	sp|Q96G04|FA86A_HUMAN
146	18469	ILDISEHTL	ILDISEHTL/2	126.5	A02	9	sp|Q9UBU7|DBF4A_HUMAN
72	8683	GIMKKAYEL	GIM[147]KKAYEL/2	120.597	A02	9	sp|P11831|SRF_HUMAN
168	20000	ALDPLADKILI	ALDPLADKILI/2	119.048	A02	11	sp|Q9UJA2|CRLS1_HUMAN
78	9270	KLSLVAAMLLL	KLSLVAAMLLL/2	118.846	A02	11	sp|P11021|GRP78_HUMAN
10	1172	ALYGHTQAV	ALYGHTQAV/2	117.2	A02	9	sp|Q6ZS81|WDFY4_HUMAN
172	19728	QVFPGLLERV	QVFPGLLERV/2	114.698	A02	10	sp|Q9UBB4|ATX10_HUMAN
47	5390	RLQETEGMVAV	RLQETEGM[147]VAV/2	114.681	A02	11	sp|Q9UGU5|HMGX4_HUMAN
178	20188	HLSIINEYL	HLSIINEYL/2	113.416	A02	9	sp|P46940|IQGA1_HUMAN
5	559	RLMNDMTAV	RLM[147]NDM[147]TAV/2	111.8	A02	9	sp|Q92598|HS105_HUMAN
31	3433	KVVALVHAV	KVVALVHAV/2	110.742	A02	9	sp|P24001|IL32_HUMAN
169	18287	TVTTVILEV	TVTTVILEV/2	108.207	A02	9	sp|Q9UKF6|CPSF3_HUMAN
186	20002	LLGPRLVLA	LLGPRLVLA/2	107.538	A02	9	sp|P49755|TMEDA_HUMAN
96	10312	VLTSVTEAL	VLTSVTEAL/2	107.417	A02	9	sp|Q7Z401|MYCPP_HUMAN
9	962	SLWSLTHLTAL	SLWSLTHLTAL/2	106.889	A02	11	sp|Q96LI5|CNO6L_HUMAN
185	19404	ALSNLEVKL	ALSNLEVKL/2	104.886	A02	9	sp|Q86UX7|URP2_HUMAN
87	9080	MIGLVLPSL	MIGLVLPSL/2	104.368	A02	9	reverse_sp|Q8WWB7|NCUG1_HUMAN
106	11028	FVLPVATQI	FVLPVATQI/2	104.038	A02	9	sp|Q99622|C10_HUMAN
6	621	RLMNETTAV	RLM[147]NETTAV/2	103.5	A02	9	sp|O95757|HS74L_HUMAN
209	21614	HLAIKLEQV	HLAIKLEQV/2	103.416	A02	9	sp|Q9Y4B6|VPRBP_HUMAN
153	15595	GLCPHVVVL	GLCPHVVVL/2	101.928	A02	9	sp|P11586|C1TC_HUMAN
216	21064	ATIGELAQV	ATIGELAQV/2	97.519	A02	9	sp|P42345|MTOR_HUMAN
121	11494	VLLKARLVPA	VLLKARLVPA/3	94.992	A02	10	sp|Q6P995|F171B_HUMAN
221	19653	LIKEVDIYTV	LIKEVDIYTV/2	88.928	A02	10	sp|Q99873|ANM1_HUMAN
235	20787	AMPPPPPQGV	AM[147]PPPPPQGV/2	88.455	A02	10	sp|O60216|RAD21_HUMAN
213	18395	MLPPPPLTA	M[147]LPPPPLTA/2	86.362	A02	9	sp|P18858|DNLI1_HUMAN
232	19700	TLFTKELVL	TLFTKELVL/2	84.914	A02	9	sp|Q7KZF4|SND1_HUMAN
193	16158	KISTITPQI	KISTITPQI/2	83.72	A02	9	sp|P30260|CDC27_HUMAN
153	12576	KVLDLKINL	KVLDLKINL/2	82.196	A02	9	sp|Q96RL7|VP13A_HUMAN
246	20193	NLINQEIML	NLINQEIM[147]L/2	82.085	A02	9	sp|Q12923|PTN13_HUMAN
253	20521	ILTNVVPKM	ILTNVVPKM[147]/2	81.111	A02	9	sp|Q96BW5|PTER_HUMAN
30	2316	ALYASRLYL	ALYASRLYL/2	77.2	A02	9	sp|Q96IJ6|GMPPA_HUMAN
54	4129	ALAEIAKAEL	ALAEIAKAEL/2	76.463	A02	10	sp|P23246|SFPQ_HUMAN
15	1126	YLLNDRLSL	YLLNDRLSL/2	75.067	A02	9	sp|Q86VV8|RTTN_HUMAN
12	885	ALWWGTITL	ALWWGTITL/2	73.75	A02	9	sp|Q9NR82|KCNQ5_HUMAN
14	1025	SLASHIQSL	SLASHIQSL/2	73.214	A02	9	sp|Q6ZS81|WDFY4_HUMAN
232	16371	RLVQGSILKKV	RLVQGSILKKV/3	70.565	A02	11	sp|P12004|PCNA_HUMAN
277	19503	ALLKIEGVYA	ALLKIEGVYA/2	70.408	A02	10	sp|P18077|RL35A_HUMAN
295	20429	GVIAEILRGV	GVIAEILRGV/2	69.251	A02	10	sp|O00567|NOP56_HUMAN
16	1078	ALSEVTAAL	ALSEVTAAL/2	67.375	A02	9	sp|Q13586|STIM1_HUMAN
4	252	KLMDPGSLPPL	KLM[147]DPGSLPPL/2	63	A02	11	sp|P43268|ETV4_HUMAN
313	19027	GLVAGGIIGA	GLVAGGIIGA/2	60.789	A02	10	sp|Q9NPL8|TIDC1_HUMAN
210	12622	ALSQINTKL	ALSQINTKL/2	60.105	A02	9	sp|O95825|QORL1_HUMAN
165	9774	KLSLVAAML	KLSLVAAM[147]L/2	59.236	A02	9	sp|P11021|GRP78_HUMAN
64	3617	RLLKSKLYL	RLLKSKLYL/2	56.516	A02	9	sp|P10620|MGST1_HUMAN
35	1968	RVLDPSMVILEV	RVLDPSM[147]VILEV/2	56.229	A02	12	sp|Q9UJX6|ANC2_HUMAN
94	5159	RLIAQRYLL	RLIAQRYLL/3	54.883	A02	9	sp|P25789|PSA4_HUMAN
388	21199	ALVQDLAKA	ALVQDLAKA/2	54.637	A02	9	sp|P14635|CCNB1_HUMAN
364	19399	ALVVQVAEA	ALVVQVAEA/2	53.294	A02	9	sp|P07686|HEXB_HUMAN
293	14929	ATIEFMLGLL	ATIEFM[147]LGLL/2	50.952	A02	10	reverse_sp|Q15629|TRAM1_HUMAN
16	711	KLWADRISL	KLWADRISL/2	44.438	A02	9	sp|Q7Z392|TPC11_HUMAN
310	13655	RITNQVIYL	RITNQVIYL/2	44.048	A02	9	sp|Q14204|DYHC1_HUMAN
519	22413	MLELKLEEI	M[147]LELKLEEI/2	43.185	A02	9	reverse_sp|Q8WYK2|JDP2_HUMAN
485	20897	KLLPLVHQC	KLLPLVHQC/2	43.087	A02	9	sp|Q9NS18|GLRX2_HUMAN
420	18081	VLERVNAV	VLERVNAV/2	43.05	A02	8	sp|Q9UL46|PSME2_HUMAN
11	472	MLWKATIVL	M[147]LWKATIVL/2	42.909	A02	9	sp|Q9NPB8|GPCP1_HUMAN
246	10525	ALNEEAGRLLL	ALNEEAGRLLL/2	42.785	A02	11	sp|Q16763|UBE2S_HUMAN
41	1747	RVSDINFTL	RVSDINFTL/2	42.61	A02	9	sp|Q5H9R7|PP6R3_HUMAN
535	22171	IQVTKVTQV	IQVTKVTQV/2	41.441	A02	9	sp|P48444|COPD_HUMAN
24	984	RLYSGISGLEL	RLYSGISGLEL/2	41	A02	11	sp|Q9H9Y6|RPA2_HUMAN
56	2229	RLIDLPGTEL	RLIDLPGTEL/2	39.804	A02	10	sp|Q14CB8|RHG19_HUMAN
237	9403	GVLPNIQAV	GVLPNIQAV/2	39.675	A02	9	sp|Q96QV6|H2A1A_HUMAN
531	19600	LLPPPPCPA	LLPPPPCPA/2	36.911	A02	9	sp|Q9BTY2|FUCO2_HUMAN
637	22539	IQIMKVEEI	IQIM[147]KVEEI/2	35.383	A02	9	sp|Q02543|RL18A_HUMAN
613	20869	NQFPGFKEV	NQFPGFKEV/2	34.044	A02	9	sp|P08579|RU2B_HUMAN
629	21295	KLPPPPPQA	KLPPPPPQA/2	33.855	A02	9	sp|O60341|KDM1A_HUMAN
150	5045	ALSKEGIVAL	ALSKEGIVAL/2	33.633	A02	10	sp|P40227|TCPZ_HUMAN
111	3680	VMAPRALL	VMAPRALL/2	33.153	A02	8	sp|P10321|1C07_HUMAN
80	2634	AVANIVNSV	AVANIVNSV/2	32.925	A02	9	sp|Q9BRQ8|AIFM2_HUMAN
232	7236	ALRDVSEEL	ALRDVSEEL/2	31.19	A02	9	sp|P40222|TXLNA_HUMAN
546	16865	AICPNNHEV	AICPNNHEV/2	30.888	A02	9	sp|O15143|ARC1B_HUMAN
507	15298	RVPPVPPNV	RVPPVPPNV/2	30.174	A02	9	sp|Q9Y483|MTF2_HUMAN
821	23382	KLFDDKLQNC	KLFDDKLQNC/2	28.48	A02	10	sp|Q96SU4|OSBL9_HUMAN
553	12217	RLPGPLGTV	RLPGPLGTV/2	22.092	A02	9	sp|Q53GL7|PAR10_HUMAN
943	19939	LMEHIHKL	LM[147]EHIHKL/2	21.144	A02	8	sp|P84098|RL19_HUMAN
16	316	RLYDPASGTISL	RLYDPASGTISL/2	19.75	A02	12	sp|Q9NRK6|ABCBA_HUMAN
207	3974	YVIDPIKGLKL	YVIDPIKGLKL/3	19.198	A02	11	sp|Q15149|PLEC_HUMAN
1240	22287	ALLSSLARC	ALLSSLARC/2	17.973	A02	9	sp|Q9UNW1|MINP1_HUMAN
83	1436	FIWKSGGDLTL	FIWKSGGDLTL/2	17.301	A02	11	sp|Q8TAF3|WDR48_HUMAN
1132	19445	ALIDIQEF	ALIDIQEF/2	17.178	A02	8	sp|Q12959|DLG1_HUMAN
1050	17646	LLEVPVML	LLEVPVM[147]L/2	16.806	A02	8	sp|Q96AB3|ISOC2_HUMAN
1352	22044	AQYEHDLEVA	AQYEHDLEVA/2	16.305	A02	10	sp|P62826|RAN_HUMAN
29	457	RLSPVSPAL	RLSPVSPAL/2	15.759	A02	9	sp|O60294|TYW4_HUMAN
994	15490	LIDDKGTIKL	LIDDKGTIKL/3	15.584	A02	10	sp|P06493|CDK1_HUMAN
222	3316	AAAPVVPAV	AAAPVVPAV/2	14.937	A02	9	sp|O95271|TNKS1_HUMAN
1116	16205	KVSAENIVGI	KVSAENIVGI/2	14.521	A02	10	sp|Q8WZ42|TITIN_HUMAN
863	12194	KLGPAPKTL	KLGPAPKTL/2	14.13	A02	9	sp|Q14527|HLTF_HUMAN
1270	16216	KVFGNEIKL	KVFGNEIKL/2	12.769	A02	9	sp|P19338|NUCL_HUMAN
198	2480	YAYDGKDYIAL	YAYDGKDYIAL/2	12.525	A02	11	sp|P30447|1A23_HUMAN
1721	21490	VLYEKDIQLF	VLYEKDIQLF/2	12.487	A02	10	sp|Q9H8T0|AKTIP_HUMAN
1709	19149	IFLAPIWTL	IFLAPIWTL/2	11.205	A02	9	reverse_sp|A1A5C7|S22AN_HUMAN
1946	20442	GLADKVYF	GLADKVYF/2	10.505	A02	8	sp|P27708|PYR1_HUMAN
1854	18941	NVIERLQEA	NVIERLQEA/2	10.216	A02	9	sp|Q9UBK9|UXT_HUMAN
2125	19045	RQPDSGISSI	RQPDSGISSI/2	8.962	A02	10	sp|P04843|RPN1_HUMAN
1313	11540	GVAPSRAIYFA	GVAPSRAIYFA/2	8.789	A02	11	sp|Q96CQ1|S2536_HUMAN
19	166	FLMQYPGRSL	FLM[147]QYPGRSL/2	8.737	A02	10	sp|Q9GZR7|DDX24_HUMAN
1553	13397	KVVLTQANKLGV	KVVLTQANKLGV/3	8.627	A02	12	sp|O94979|SC31A_HUMAN
2682	21540	KLWDFQGFE	KLWDFQGFE/2	8.031	A02	9	sp|P43034|LIS1_HUMAN
1675	13297	RLSEFIPAVF	RLSEFIPAVF/2	7.939	A02	10	sp|Q12768|STRUM_HUMAN
2967	20837	QVPQSVIVQV	QVPQSVIVQV/2	7.023	A02	10	reverse_sp|Q8WUN7|UBTD2_HUMAN
3091	20305	ILIDVTYPLW	ILIDVTYPLW/2	6.569	A02	10	reverse_sp|Q969N4|TAAR8_HUMAN
3874	22208	LAVYIDRV	LAVYIDRV/2	5.733	A02	8	sp|P02545|LMNA_HUMAN
3354	18429	YGLPVVVKL	YGLPVVVKL/2	5.495	A02	9	sp|P35222|CTNB1_HUMAN
1258	6891	IADAFAIPAL	IADAFAIPAL/2	5.478	A02	10	sp|Q5GH76|XKR4_HUMAN
3489	17922	AILDDVRMWT	AILDDVRM[147]WT/2	5.137	A02	10	reverse_sp|Q8WZ42|TITIN_HUMAN
4552	22524	LAVYIDKV	LAVYIDKV/2	4.948	A02	8	sp|P20700|LMNB1_HUMAN
1276	6298	VVIRGNSIIML	VVIRGNSIIM[147]L/2	4.936	A02	11	sp|P62308|RUXG_HUMAN
4846	23837	KLPSETIFVGC	KLPSETIFVGC/2	4.919	A02	11	sp|P57678|GEMI4_HUMAN
4531	21435	FLPPPFPPP	FLPPPFPPP/2	4.731	A02	9	sp|Q01844|EWS_HUMAN
4099	18815	ALAGHLQTC	ALAGHLQTC/2	4.59	A02	9	sp|O95271|TNKS1_HUMAN
4698	21562	VQSMDVAAFNKI	VQSM[147]DVAAFNKI/2	4.59	A02	12	sp|P24534|EF1B_HUMAN
1333	6114	TTLHRLLAL	TTLHRLLAL/2	4.587	A02	9	sp|Q96M86|DNHD1_HUMAN
4613	21072	IALNEDLRSWTA	IALNEDLRSWTA/2	4.568	A02	12	sp|P18462|1A25_HUMAN
4589	20910	LLITGTLHQ	LLITGTLHQ/2	4.557	A02	9	sp|P61421|VA0D1_HUMAN
5129	22483	SLYDQAEKLVS	SLYDQAEKLVS/2	4.384	A02	11	sp|O43242|PSMD3_HUMAN
226	927	KVAPAPAVV	KVAPAPAVV/2	4.102	A02	9	sp|P62424|RL7A_HUMAN
4194	17038	MSVTFSMIL	M[147]SVTFSMIL/2	4.062	A02	9	reverse_sp|Q8N699|MYCT1_HUMAN
4493	15780	FIVPLTDLRIPS	FIVPLTDLRIPS/2	3.512	A02	12	sp|P04114|APOB_HUMAN
5850	19761	GSISRIYL	GSISRIYL/2	3.378	A02	8	sp|O75821|EIF3G_HUMAN
7369	24065	LSLENLEKI	LSLENLEKI/2	3.266	A02	9	sp|Q9Y2H2|SAC2_HUMAN
6116	19864	YRPAYLVTL	YRPAYLVTL/2	3.248	A02	9	sp|Q9UBI1|COMD3_HUMAN
7441	23671	LHLGALYGI	LHLGALYGI/2	3.181	A02	9	sp|O00767|ACOD_HUMAN
7100	22350	VLDELKNMKC	VLDELKNM[147]KC/2	3.148	A02	10	sp|Q96F07|CYFP2_HUMAN
6731	20938	FQRDYYDRM	FQRDYYDRM[147]/3	3.111	A02	9	sp|P07910|HNRPC_HUMAN
3974	12342	MIRAILEII	MIRAILEII/2	3.106	A02	9	sp|O75417|DPOLQ_HUMAN
28179	6	RPRPGTGLGRVM	RPRPGTGLGRVM/3	4696.5	B07	12	sp|Q9BVK6|TMED9_HUMAN
30345	7	APRGQRPESAL	APRGQRPESAL/2	4335	B07	11	sp|P28062|PSB8_HUMAN
30150	7	TPRPTGTPL	TPRPTGTPL/2	4307.14	B07	9	sp|Q7Z7G0|TARSH_HUMAN
29484	7	APRPPPKPM	APRPPPKPM[147]/2	4212	B07	9	sp|P62854|RS26_HUMAN;sp|Q5JNZ5|RS26L_HUMAN
29439	7	GPRGMGTAL	GPRGM[147]GTAL/2	4205.57	B07	9	sp|Q99623|PHB2_HUMAN
29371	7	APRPPFSTM	APRPPFSTM[147]/2	4195.86	B07	9	sp|P11940|PABP1_HUMAN
29276	7	SPRKPSHPVM	SPRKPSHPVM[147]/3	4182.29	B07	10	sp|Q8NA72|POC5_HUMAN
29275	7	SPRLSSSL	SPRLSSSL/2	4182.14	B07	8	sp|O14974|MYPT1_HUMAN
29050	7	SPRQLFSAL	SPRQLFSAL/2	4150	B07	9	sp|Q9NTJ4|MA2C1_HUMAN
28822	7	APRHPSTNSL	APRHPSTNSL/3	4117.43	B07	10	sp|Q9P032|NDUF4_HUMAN
28256	7	SPRWGGIM	SPRWGGIM[147]/2	4036.57	B07	8	sp|Q96S52|PIGS_HUMAN
31669	8	SPRGPGQGSGHL	SPRGPGQGSGHL/3	3958.62	B07	12	sp|Q15027|ACAP1_HUMAN
27245	7	RPYYPRKAL	RPYYPRKAL/3	3892.14	B07	9	sp|Q6NTF7|ABC3H_HUMAN
31020	8	SPRGPGCSL	SPRGPGCSL/2	3877.5	B07	9	sp|Q9NQT4|EXOS5_HUMAN
26972	7	APRKGSFSAL	APRKGSFSAL/2	3853.14	B07	10	sp|Q13619|CUL4A_HUMAN
30695	8	VPRPTKSSF	VPRPTKSSF/2	3836.88	B07	9	sp|Q5VVJ2|MYSM1_HUMAN
26807	7	SPRHLPSCSPAL	SPRHLPSCSPAL/3	3829.57	B07	12	sp|P15586|GNS_HUMAN
30573	8	VPRPPQTSL	VPRPPQTSL/2	3821.62	B07	9	sp|O95785|WIZ_HUMAN
26668	7	VPRPVLRAL	VPRPVLRAL/2	3809.71	B07	9	sp|Q9GZR7|DDX24_HUMAN
30151	8	SPRLPVGGFRSL	SPRLPVGGFRSL/3	3768.88	B07	12	sp|Q14669|TRIPC_HUMAN
26354	7	SPAPPRPSL	SPAPPRPSL/2	3764.86	B07	9	sp|Q14626|I11RA_HUMAN
26322	7	IPRTPLSPSPM	IPRTPLSPSPM[147]/2	3760.29	B07	11	sp|Q69YQ0|CYTSA_HUMAN
30010	8	RPRNPAGRTGL	RPRNPAGRTGL/3	3751.25	B07	11	sp|Q9BW91|NUDT9_HUMAN
29928	8	SPEETRAAL	SPEETRAAL/2	3741	B07	9	sp|P78549|NTH_HUMAN
29733	8	VPRKPVKHTAM	VPRKPVKHTAM[147]/3	3716.62	B07	11	sp|P21333|FLNA_HUMAN
29506	8	SPRPSGPGPSSF	SPRPSGPGPSSF/2	3688.25	B07	12	sp|Q96T58|MINT_HUMAN
29390	8	SPRGSTDSL	SPRGSTDSL/2	3673.75	B07	9	sp|Q9UQQ2|SH2B3_HUMAN
32980	9	EPRPPHGEL	EPRPPHGEL/2	3664.44	B07	9	sp|P04818|TYSY_HUMAN
29308	8	RPRPSGEEVL	RPRPSGEEVL/2	3663.5	B07	10	sp|P33992|MCM5_HUMAN
29261	8	KPRKPAGAA	KPRKPAGAA/2	3657.62	B07	9	sp|P16402|H13_HUMAN
29254	8	LPRIQSTAL	LPRIQSTAL/2	3656.75	B07	9	sp|Q13085|ACACA_HUMAN
25585	7	RPYQPLGAL	RPYQPLGAL/2	3655	B07	9	sp|Q9Y5Y2|NUBP2_HUMAN
29185	8	HPRSPTPTL	HPRSPTPTL/2	3648.12	B07	9	sp|Q96HE9|PRR11_HUMAN
29182	8	APRPAGSYL	APRPAGSYL/2	3647.75	B07	9	sp|P33076|C2TA_HUMAN
28977	8	NPRTQTHATL	NPRTQTHATL/2	3622.12	B07	10	sp|Q12882|DPYD_HUMAN
25308	7	RPRPVLRSV	RPRPVLRSV/3	3615.43	B07	9	sp|P40337|VHL_HUMAN
28864	8	SPRSPSTTYL	SPRSPSTTYL/2	3608	B07	10	sp|Q13111|CAF1A_HUMAN
28839	8	SPRSSLNNSL	SPRSSLNNSL/2	3604.88	B07	10	sp|Q9UPW0|FOXJ3_HUMAN
28524	8	APRPPVSAA	APRPPVSAA/2	3565.5	B07	9	sp|Q8TF74|WIPF2_HUMAN
28441	8	SPRNLGFETSAF	SPRNLGFETSAF/2	3555.12	B07	12	sp|Q9UBF8|PI4KB_HUMAN
24856	7	SPAPRTAL	SPAPRTAL/2	3550.86	B07	8	sp|Q96RJ3|TR13C_HUMAN
28387	8	SPGSPRPAL	SPGSPRPAL/2	3548.38	B07	9	sp|Q9H211|CDT1_HUMAN
28349	8	SPRSSTVHIL	SPRSSTVHIL/3	3543.62	B07	10	sp|Q9UNY4|TTF2_HUMAN
28286	8	RPRPDEERPL	RPRPDEERPL/2	3535.75	B07	10	sp|Q86YV0|RASL3_HUMAN
28231	8	HPRSPNVLSVAL	HPRSPNVLSVAL/2	3528.88	B07	12	sp|Q16665|HIF1A_HUMAN
28224	8	SPRKDGLVSL	SPRKDGLVSL/2	3528	B07	10	sp|P51570|GALK1_HUMAN
24642	7	APLQHRHVL	APLQHRHVL/2	3520.29	B07	9	sp|Q504T8|MIDN_HUMAN
28129	8	SPNQARAQAAL	SPNQARAQAAL/2	3516.12	B07	11	sp|P26599|PTBP1_HUMAN
31639	9	SPEQSRNVL	SPEQSRNVL/2	3515.44	B07	9	sp|Q96JM3|CHAP1_HUMAN
27967	8	SPRGGTPGSGAA	SPRGGTPGSGAA/2	3495.88	B07	12	sp|O14497|ARI1A_HUMAN
27889	8	KPQGQRTSL	KPQGQRTSL/2	3486.12	B07	9	sp|Q92547|TOPB1_HUMAN
27848	8	SPRIYSNSL	SPRIYSNSL/2	3481	B07	9	sp|Q9Y2U8|MAN1_HUMAN
27691	8	NPRDPSSSSSM	NPRDPSSSSSM[147]/2	3461.38	B07	11	sp|Q9Y6N7|ROBO1_HUMAN
27601	8	APRGTWSTGL	APRGTWSTGL/2	3450.12	B07	10	sp|O60828|PQBP1_HUMAN
27588	8	SPSSPGSSL	SPSSPGSSL/2	3448.5	B07	9	sp|O95271|TNKS1_HUMAN
27558	8	RPRDPTPSF	RPRDPTPSF/2	3444.75	B07	9	sp|Q14137|BOP1_HUMAN
30903	9	SPRISPATTL	SPRISPATTL/2	3433.67	B07	10	sp|Q8IVW6|ARI3B_HUMAN
27467	8	APRPYASSL	APRPYASSL/2	3433.38	B07	9	sp|Q96EP0|RNF31_HUMAN
27437	8	RPRETRVIAVL	RPRETRVIAVL/3	3429.62	B07	11	sp|P33076|C2TA_HUMAN
27249	8	GPRGSGPPM	GPRGSGPPM[147]/2	3406.12	B07	9	sp|P48634|PRC2A_HUMAN
27064	8	RPHLAGTHTSL	RPHLAGTHTSL/3	3383	B07	11	sp|Q8IYD8|FANCM_HUMAN
27054	8	APRTNGVAM	APRTNGVAM[147]/2	3381.75	B07	9	sp|Q92567|F168A_HUMAN
30370	9	LPRGRKQLAL	LPRGRKQLAL/2	3374.44	B07	10	sp|O60759|CYTIP_HUMAN
26995	8	TPSPARPAL	TPSPARPAL/2	3374.38	B07	9	sp|Q9H211|CDT1_HUMAN
26949	8	APRTVALTAL	APRTVALTAL/2	3368.62	B07	10	sp|P04440|DPB1_HUMAN
26946	8	MPRGPTLGHVSL	M[147]PRGPTLGHVSL/3	3368.25	B07	12	sp|Q96TA2|YMEL1_HUMAN
26918	8	LPRPPMLLAL	LPRPPM[147]LLAL/2	3364.75	B07	10	sp|P07686|HEXB_HUMAN
26865	8	RPKSTSTSSM	RPKSTSTSSM/2	3358.12	B07	10	sp|P27816|MAP4_HUMAN
30098	9	SPRKPIDSL	SPRKPIDSL/2	3344.22	B07	9	sp|Q9UQ35|SRRM2_HUMAN
26539	8	RPSGPGGEM	RPSGPGGEM[147]/2	3317.38	B07	9	sp|P14373|TRI27_HUMAN
26390	8	RPSGPSKAL	RPSGPSKAL/2	3298.75	B07	9	sp|P48444|COPD_HUMAN
29682	9	HPRIASGLGL	HPRIASGLGL/2	3298	B07	10	sp|O14880|MGST3_HUMAN
29679	9	VPESHRKPL	VPESHRKPL/2	3297.67	B07	9	sp|Q01850|CDR2_HUMAN
26378	8	APRTFSNSL	APRTFSNSL/2	3297.25	B07	9	sp|Q99551|MTERF_HUMAN
29552	9	APRQPGLM	APRQPGLM[147]/2	3283.56	B07	8	sp|Q9Y6H1|CHCH2_HUMAN
22969	7	SPGWVRLAL	SPGWVRLAL/2	3281.29	B07	9	sp|Q9BQB6|VKOR1_HUMAN
26207	8	KPRPPLHLL	KPRPPLHLL/2	3275.88	B07	9	sp|Q8N4T4|ARG39_HUMAN
26149	8	HPINPRVAL	HPINPRVAL/2	3268.62	B07	9	sp|Q9P0U4|CXXC1_HUMAN
29388	9	APRQPGLMAQM	APRQPGLMAQM/2	3265.33	B07	11	sp|Q9Y6H1|CHCH2_HUMAN
26098	8	APREGQGSSAV	APREGQGSSAV/2	3262.25	B07	11	sp|Q16566|KCC4_HUMAN
29347	9	NPRVKAAAL	NPRVKAAAL/2	3260.78	B07	9	sp|O15269|SPTC1_HUMAN
29207	9	KPEEQRQAL	KPEEQRQAL/2	3245.22	B07	9	sp|Q15149|PLEC_HUMAN
29121	9	KPRVPPATAF	KPRVPPATAF/2	3235.67	B07	10	sp|Q99707|METH_HUMAN
22484	7	RPAPPLRPSAAL	RPAPPLRPSAAL/3	3212	B07	12	sp|Q15052|ARHG6_HUMAN
25644	8	RPKEGTSTL	RPKEGTSTL/2	3205.5	B07	9	sp|Q9Y5W9|SNX11_HUMAN
28794	9	APRKKSPDL	APRKKSPDL/2	3199.33	B07	9	sp|Q9BT25|HAUS8_HUMAN
25528	8	SPAPTHNSL	SPAPTHNSL/2	3191	B07	9	sp|P49327|FAS_HUMAN
28650	9	RPHNRNGGQL	RPHNRNGGQL/3	3183.33	B07	10	sp|Q9GZT5|WN10A_HUMAN
25453	8	RPSTSRSL	RPSTSRSL/2	3181.62	B07	8	sp|P08670|VIME_HUMAN
25446	8	SPMMPRITSVF	SPM[147]M[147]PRITSVF/2	3180.75	B07	11	sp|Q6AHZ1|Z518A_HUMAN
28570	9	TPRGGVGSVAL	TPRGGVGSVAL/2	3174.44	B07	11	sp|Q9P2G9|KLHL8_HUMAN
25356	8	RPRHQGVMVGM	RPRHQGVM[147]VGM[147]/3	3169.5	B07	11	sp|P62736|ACTA_HUMAN
28523	9	APRAGEQGEAM	APRAGEQGEAM[147]/2	3169.22	B07	11	sp|Q5JSZ5|PRC2B_HUMAN
28341	9	APRHGLQSL	APRHGLQSL/2	3149	B07	9	sp|P48634|PRC2A_HUMAN
28250	9	FPRSPGQPSSL	FPRSPGQPSSL/2	3138.89	B07	11	sp|Q5T011|SZT2_HUMAN
28196	9	VPRPTSTVGL	VPRPTSTVGL/2	3132.89	B07	10	sp|Q9BSJ1|TRI51_HUMAN
28180	9	SPQSPGDAL	SPQSPGDAL/2	3131.11	B07	9	sp|Q96KR1|ZFR_HUMAN
28174	9	APREALAQTVL	APREALAQTVL/2	3130.44	B07	11	sp|Q99829|CPNE1_HUMAN
24983	8	KPQKGGPL	KPQKGGPL/2	3122.88	B07	8	sp|Q9UNY4|TTF2_HUMAN
24983	8	SPSSLRAL	SPSSLRAL/2	3122.88	B07	8	sp|Q8IXJ9|ASXL1_HUMAN
28083	9	APKPGGLSL	APKPGGLSL/2	3120.33	B07	9	sp|Q8NCH0|CHSTE_HUMAN
28082	9	VPRPVLRALSF	VPRPVLRALSF/3	3120.22	B07	11	sp|Q9GZR7|DDX24_HUMAN
28052	9	SPQKTMSVL	SPQKTM[147]SVL/2	3116.89	B07	9	sp|Q12888|TP53B_HUMAN
27994	9	GPHQRHIAL	GPHQRHIAL/2	3110.44	B07	9	sp|Q3B726|RPA43_HUMAN
27948	9	VPNQKRLTL	VPNQKRLTL/2	3105.33	B07	9	sp|O60488|ACSL4_HUMAN
27846	9	SPGGPRAAV	SPGGPRAAV/2	3094	B07	9	sp|P53814|SMTN_HUMAN
27800	9	VPRPPSLLATL	VPRPPSLLATL/2	3088.89	B07	11	sp|Q14689|DIP2A_HUMAN
27787	9	APRPAAPAA	APRPAAPAA/2	3087.44	B07	9	sp|Q12872|SFSWA_HUMAN
27702	9	APAPSKGQTL	APAPSKGQTL/2	3078	B07	10	sp|Q6ZRI6|CO039_HUMAN
30735	10	LPRQPPMSL	LPRQPPM[147]SL/2	3073.5	B07	9	sp|Q13045|FLII_HUMAN
27588	9	RPAPPMKGQL	RPAPPMKGQL/3	3065.33	B07	10	sp|Q86TS9|RM52_HUMAN
24440	8	SPRWGGIMV	SPRWGGIM[147]V/2	3055	B07	9	sp|Q96S52|PIGS_HUMAN
24412	8	SPSRHFSSL	SPSRHFSSL/2	3051.5	B07	9	sp|O75417|DPOLQ_HUMAN
30459	10	TPRPPGPGL	TPRPPGPGL/2	3045.9	B07	9	sp|Q8NEZ4|KMT2C_HUMAN
30374	10	APRVPVQAL	APRVPVQAL/2	3037.4	B07	9	sp|O75179|ANR17_HUMAN
27294	9	SPRAPFYRPL	SPRAPFYRPL/3	3032.67	B07	10	sp|A6NED2|RCCD1_HUMAN
27285	9	RPENYREAL	RPENYREAL/3	3031.67	B07	9	sp|P06276|CHLE_HUMAN
24222	8	RPYPSPGAVL	RPYPSPGAVL/2	3027.75	B07	10	sp|O60828|PQBP1_HUMAN
27160	9	APRPVDEPAM	APRPVDEPAM[147]/2	3017.78	B07	10	sp|Q9Y2X0|MED16_HUMAN
30005	10	MPRQPSATRL	M[147]PRQPSATRL/3	3000.5	B07	10	sp|Q6P582|MZT2A_HUMAN
26803	9	SPRPPLISV	SPRPPLISV/2	2978.11	B07	9	sp|Q9H0R1|AP5M1_HUMAN
29750	10	SPRLPVGGF	SPRLPVGGF/2	2975	B07	9	sp|Q14669|TRIPC_HUMAN
26731	9	KPKSSSTAL	KPKSSSTAL/2	2970.11	B07	9	sp|Q8WYP5|ELYS_HUMAN
26692	9	RPRFAEIVNTL	RPRFAEIVNTL/2	2965.78	B07	11	sp|P54762|EPHB1_HUMAN
23724	8	RPHYSLRTL	RPHYSLRTL/3	2965.5	B07	9	sp|Q9NU22|MDN1_HUMAN
23671	8	RPAGLQGAL	RPAGLQGAL/2	2958.88	B07	9	sp|Q02127|PYRD_HUMAN
26549	9	APSKSESAL	APSKSESAL/2	2949.89	B07	9	sp|Q9GZR7|DDX24_HUMAN
29473	10	APTKRKSL	APTKRKSL/2	2947.3	B07	8	sp|P46013|KI67_HUMAN
29416	10	SPRLSQTFL	SPRLSQTFL/2	2941.6	B07	9	sp|Q92608|DOCK2_HUMAN
26473	9	RPRADTGHAFL	RPRADTGHAFL/3	2941.44	B07	11	sp|Q9Y618|NCOR2_HUMAN
29392	10	RPRLTSNEKL	RPRLTSNEKL/2	2939.2	B07	10	sp|Q9Y296|TPPC4_HUMAN
23507	8	SPMADRSMM	SPM[147]ADRSM[147]M[147]/2	2938.38	B07	9	sp|P18583|SON_HUMAN
26432	9	SPTSVRQMAL	SPTSVRQM[147]AL/2	2936.89	B07	10	sp|Q96NB2|SFXN2_HUMAN
29331	10	IPRLPERMTTL	IPRLPERMTTL/3	2933.1	B07	11	sp|O95466|FMNL_HUMAN
20502	7	YPRPGTPAA	YPRPGTPAA/2	2928.86	B07	9	sp|Q5VV42|CDKAL_HUMAN
26282	9	SPNGHRPQL	SPNGHRPQL/2	2920.22	B07	9	sp|Q5SRD0|FA21D_HUMAN
29056	10	RPRVALQQSF	RPRVALQQSF/2	2905.6	B07	10	sp|Q9P265|DIP2B_HUMAN
26010	9	RPTPKNSL	RPTPKNSL/2	2890	B07	8	sp|O95168|NDUB4_HUMAN
25801	9	RPRKAFLLL	RPRKAFLLL/3	2866.78	B07	9	sp|P13667|PDIA4_HUMAN
22928	8	RPSSTSSASAL	RPSSTSSASAL/2	2866	B07	11	sp|Q13107|UBP4_HUMAN
28576	10	SPEDRGSSL	SPEDRGSSL/2	2857.6	B07	9	sp|Q76I76|SSH2_HUMAN
22833	8	RPSTPHTITL	RPSTPHTITL/2	2854.12	B07	10	sp|Q12770|SCAP_HUMAN
25628	9	RPKENSMSTL	RPKENSM[147]STL/2	2847.56	B07	10	sp|Q9H992|MARH7_HUMAN
28427	10	SPELRSTAM	SPELRSTAM[147]/2	2842.7	B07	9	sp|P42345|MTOR_HUMAN
28245	10	HPRTSITVVL	HPRTSITVVL/2	2824.5	B07	10	sp|Q9NQT4|EXOS5_HUMAN
22590	8	YPRLGGFVM	YPRLGGFVM[147]/2	2823.75	B07	9	sp|Q92797|SYMPK_HUMAN
22531	8	RPLGAGEAL	RPLGAGEAL/2	2816.38	B07	9	sp|Q96SI9|STRBP_HUMAN
25331	9	RPHSVIGGSL	RPHSVIGGSL/2	2814.56	B07	10	sp|Q00537|CDK17_HUMAN
22495	8	GPASHSRAL	GPASHSRAL/2	2811.88	B07	9	sp|Q14699|RFTN1_HUMAN
22495	8	VPASKRPPL	VPASKRPPL/2	2811.88	B07	9	sp|O60682|MUSC_HUMAN
22478	8	KPYQGVGSSSM	KPYQGVGSSSM[147]/2	2809.75	B07	11	sp|Q12907|LMAN2_HUMAN
22471	8	TPAPPTHAL	TPAPPTHAL/2	2808.88	B07	9	sp|Q5SXM2|SNPC4_HUMAN
25271	9	SPMAERSMM	SPM[147]AERSM[147]M[147]/2	2807.89	B07	9	sp|P18583|SON_HUMAN
27992	10	RPKKSGDMTL	RPKKSGDM[147]TL/3	2799.2	B07	10	sp|Q8NFC6|BD1L1_HUMAN
25158	9	APSRNGMVL	APSRNGM[147]VL/2	2795.33	B07	9	sp|P26373|RL13_HUMAN
30748	11	APRLETKSL	APRLETKSL/2	2795.27	B07	9	sp|Q6P6C2|ALKB5_HUMAN
25096	9	KPTGARPSAL	KPTGARPSAL/2	2788.44	B07	10	sp|O15213|WDR46_HUMAN
25086	9	RPANHRQLTF	RPANHRQLTF/3	2787.33	B07	10	sp|Q9UNM6|PSD13_HUMAN
25075	9	RPRKAFLL	RPRKAFLL/2	2786.11	B07	8	sp|P13667|PDIA4_HUMAN
27766	10	SPRDPVLTL	SPRDPVLTL/2	2776.6	B07	9	sp|Q86XL3|ANKL2_HUMAN
27748	10	LPNQARAQAAL	LPNQARAQAAL/2	2774.8	B07	11	sp|O95758|PTBP3_HUMAN
27695	10	APTPARPVL	APTPARPVL/2	2769.5	B07	9	sp|Q9HAB3|S52A2_HUMAN
27627	10	APRPFPEVSL	APRPFPEVSL/2	2762.7	B07	10	sp|Q96KV7|WDR90_HUMAN
30258	11	APRQDASGQSL	APRQDASGQSL/2	2750.73	B07	11	sp|Q14324|MYPC2_HUMAN
27323	10	RPKPPSATSI	RPKPPSATSI/2	2732.3	B07	10	sp|Q9UMS4|PRP19_HUMAN
30046	11	RPRPGQATSH	RPRPGQATSH/2	2731.45	B07	10	sp|Q8TE02|ELP5_HUMAN
27295	10	RPREAEVRFL	RPREAEVRFL/3	2729.5	B07	10	sp|Q13438|OS9_HUMAN
24549	9	APAPRPSL	APAPRPSL/2	2727.67	B07	8	sp|Q92620|PRP16_HUMAN
29996	11	VPRSQGTEAEL	VPRSQGTEAEL/2	2726.91	B07	11	sp|Q8NAG6|ANKL1_HUMAN
24529	9	SPFRSGTPM	SPFRSGTPM[147]/2	2725.44	B07	9	sp|Q96FX7|TRM61_HUMAN
27053	10	KPSVKGRAQL	KPSVKGRAQL/3	2705.3	B07	10	sp|P40227|TCPZ_HUMAN
29742	11	RPRNLGELCQRL	RPRNLGELCQRL/3	2703.82	B07	12	sp|Q9UI14|PRAF1_HUMAN
27012	10	RPHVSPRHSF	RPHVSPRHSF/3	2701.2	B07	10	sp|Q01201|RELB_HUMAN
26933	10	GPRSISVSAL	GPRSISVSAL/2	2693.3	B07	10	sp|Q8IVT5|KSR1_HUMAN
29625	11	NPRQPLPASGL	NPRQPLPASGL/2	2693.18	B07	11	sp|Q96L08|SUSD3_HUMAN
26742	10	TPSPTRYSL	TPSPTRYSL/2	2674.2	B07	9	sp|P49792|RBP2_HUMAN
26738	10	APRELGLGL	APRELGLGL/2	2673.8	B07	9	sp|Q9BTD8|RBM42_HUMAN
24060	9	RPVAPSGTAL	RPVAPSGTAL/2	2673.33	B07	10	sp|P35658|NU214_HUMAN
29391	11	NPRSPPATM	NPRSPPATM[147]/2	2671.91	B07	9	sp|Q6ZMC9|SIG15_HUMAN
29389	11	SPSKPAKSL	SPSKPAKSL/2	2671.73	B07	9	sp|P86790|CCZ1B_HUMAN
24005	9	RPAQVSQPF	RPAQVSQPF/2	2667.22	B07	9	sp|Q9Y520|PRC2C_HUMAN
23978	9	GPLPPHLAL	GPLPPHLAL/2	2664.22	B07	9	sp|Q08211|DHX9_HUMAN
23907	9	RPRKAFLLLL	RPRKAFLLLL/3	2656.33	B07	10	sp|P13667|PDIA4_HUMAN
26556	10	RPAPPAQSL	RPAPPAQSL/2	2655.6	B07	9	sp|O95208|EPN2_HUMAN
23849	9	RPAPPPEAL	RPAPPPEAL/2	2649.89	B07	9	sp|Q9NQG6|MID51_HUMAN
23832	9	LPSWGRAELAL	LPSWGRAELAL/2	2648	B07	11	sp|Q96EP0|RNF31_HUMAN
26457	10	RPRHQGVMV	RPRHQGVMV/2	2645.7	B07	9	sp|P62736|ACTA_HUMAN
29009	11	SPAHPKQTL	SPAHPKQTL/2	2637.18	B07	9	sp|Q9UIF8|BAZ2B_HUMAN
21096	8	SPLNSSSAL	SPLNSSSAL/2	2637	B07	9	sp|Q9BVP2|GNL3_HUMAN
28962	11	IPRGPASQF	IPRGPASQF/2	2632.91	B07	9	sp|P49750|YLPM1_HUMAN
28902	11	APRAPPGPAGL	APRAPPGPAGL/2	2627.45	B07	11	sp|Q9NRL3|STRN4_HUMAN
23623	9	RPNNAYTAM	RPNNAYTAM[147]/2	2624.78	B07	9	sp|Q9Y5A9|YTHD2_HUMAN
23534	9	RPNGRVALRTL	RPNGRVALRTL/3	2614.89	B07	11	sp|Q96HS1|PGAM5_HUMAN
23531	9	FPEPSRPPL	FPEPSRPPL/2	2614.56	B07	9	sp|Q2V2M9|FHOD3_HUMAN
20879	8	RPSPWRPLVL	RPSPWRPLVL/3	2609.88	B07	10	sp|Q9Y4P1|ATG4B_HUMAN
28682	11	APRLPITGL	APRLPITGL/2	2607.45	B07	9	sp|Q8TF50|ZN526_HUMAN
23439	9	RPEHHNLAF	RPEHHNLAF/3	2604.33	B07	9	sp|A7E2V4|ZSWM8_HUMAN
23423	9	TPMHPPSSL	TPM[147]HPPSSL/2	2602.56	B07	9	sp|P23771|GATA3_HUMAN
28616	11	APREGQGSSA	APREGQGSSA/2	2601.45	B07	10	sp|Q16566|KCC4_HUMAN
25994	10	SPGQRSISL	SPGQRSISL/2	2599.4	B07	9	sp|P00519|ABL1_HUMAN
25987	10	RPRGFAYVQF	RPRGFAYVQF/2	2598.7	B07	10	sp|O75494|SRS10_HUMAN
23384	9	LPAPKGPAL	LPAPKGPAL/2	2598.22	B07	9	sp|Q92733|PRCC_HUMAN
28579	11	GPRPITQSEL	GPRPITQSEL/2	2598.09	B07	10	sp|Q96S82|UBL7_HUMAN
28579	11	APRTLLQVL	APRTLLQVL/2	2598.09	B07	9	sp|Q5TEJ8|THMS2_HUMAN
23325	9	KPVSLGQAL	KPVSLGQAL/2	2591.67	B07	9	sp|O60341|KDM1A_HUMAN
28444	11	VPRVLGSSV	VPRVLGSSV/2	2585.82	B07	9	sp|Q07021|C1QBP_HUMAN
25780	10	KPVKPHSSF	KPVKPHSSF/2	2578	B07	9	sp|Q9Y520|PRC2C_HUMAN
23194	9	RPSVPAALPL	RPSVPAALPL/2	2577.11	B07	10	sp|P08174|DAF_HUMAN
20570	8	SVRPGGAAM	SVRPGGAAM[147]/2	2571.25	B07	9	sp|O15085|ARHGB_HUMAN
28256	11	APRIITGPAPVL	APRIITGPAPVL/2	2568.73	B07	12	sp|Q96PU8|QKI_HUMAN
28255	11	APTVRSKAL	APTVRSKAL/2	2568.64	B07	9	sp|P42695|CNDD3_HUMAN
28232	11	RPKGGSGDTL	RPKGGSGDTL/2	2566.55	B07	10	sp|Q96F44|TRI11_HUMAN
28209	11	SPSGSKMQL	SPSGSKM[147]QL/2	2564.45	B07	9	sp|Q9Y6D9|MD1L1_HUMAN
27970	11	TPRSYVGVTL	TPRSYVGVTL/2	2542.73	B07	10	sp|Q92535|PIGC_HUMAN
22868	9	RPHYGSVL	RPHYGSVL/2	2540.89	B07	8	sp|P46940|IQGA1_HUMAN
27920	11	APGPPGRSML	APGPPGRSML/2	2538.18	B07	10	sp|Q8IY67|RAVR1_HUMAN
22822	9	SPTDRSMSSSL	SPTDRSM[147]SSSL/2	2535.78	B07	11	sp|O75448|MED24_HUMAN
22777	9	RPTGSVSSTL	RPTGSVSSTL/2	2530.78	B07	10	sp|Q86UK7|ZN598_HUMAN
30280	12	TPKPPSQAL	TPKPPSQAL/2	2523.33	B07	9	sp|Q9NQ66|PLCB1_HUMAN
27746	11	APRKVLGSSTSA	APRKVLGSSTSA/2	2522.36	B07	12	sp|Q15004|PAF15_HUMAN
27733	11	LPRAVNTQAL	LPRAVNTQAL/2	2521.18	B07	10	sp|O60749|SNX2_HUMAN
22654	9	RPYAAGGKKLAL	RPYAAGGKKLAL/3	2517.11	B07	12	sp|Q9H7U1|CCSE2_HUMAN
25109	10	APLPRPGAVL	APLPRPGAVL/2	2510.9	B07	10	sp|O75638|CTAG2_HUMAN
19926	8	RPMDKTVVF	RPM[147]DKTVVF/2	2490.75	B07	9	sp|Q8NG31|CASC5_HUMAN
29751	12	TPRGGVGSV	TPRGGVGSV/2	2479.25	B07	9	sp|Q9P2G9|KLHL8_HUMAN
24738	10	RPNGTKVAVL	RPNGTKVAVL/2	2473.8	B07	10	sp|Q8NHH9|ATLA2_HUMAN
24734	10	APSPRPLSL	APSPRPLSL/2	2473.4	B07	9	sp|Q6NUT3|MFS12_HUMAN
29602	12	SPTGTGKSL	SPTGTGKSL/2	2466.83	B07	9	sp|A8MPP1|D11L8_HUMAN
27107	11	KPAPPTKAT	KPAPPTKAT/2	2464.27	B07	9	sp|Q14008|CKAP5_HUMAN
29531	12	VPRLPATAA	VPRLPATAA/2	2460.92	B07	9	sp|Q01581|HMCS1_HUMAN
27066	11	VPPPPHRPL	VPPPPHRPL/2	2460.55	B07	9	sp|Q9Y520|PRC2C_HUMAN
29464	12	TPRGAGSYTIM	TPRGAGSYTIM[147]/2	2455.33	B07	11	sp|P21333|FLNA_HUMAN
29441	12	QPRPQSTSLL	QPRPQSTSLL/2	2453.42	B07	10	sp|Q96EP0|RNF31_HUMAN
29427	12	APRAAGTVKEL	APRAAGTVKEL/3	2452.25	B07	11	sp|Q9HBR0|S38AA_HUMAN
29412	12	APRNSPTGL	APRNSPTGL/2	2451	B07	9	sp|P78312|F193A_HUMAN
29346	12	RPKKPGQSF	RPKKPGQSF/2	2445.5	B07	9	sp|O15042|SR140_HUMAN
29272	12	HPRVPSLTTV	HPRVPSLTTV/2	2439.33	B07	10	sp|Q9BW19|KIFC1_HUMAN
24391	10	SPAKNPSSL	SPAKNPSSL/2	2439.1	B07	9	sp|Q9GZR7|DDX24_HUMAN
26802	11	KPRHITPFTSF	KPRHITPFTSF/3	2436.55	B07	11	sp|P42345|MTOR_HUMAN
26694	11	LPRLLPAL	LPRLLPAL/2	2426.73	B07	8	sp|Q86Y56|HEAT2_HUMAN
21777	9	KPSTAHHRPL	KPSTAHHRPL/3	2419.67	B07	10	sp|Q08AE8|SPIR1_HUMAN
28992	12	TPRGGVGIATVM	TPRGGVGIATVM[147]/2	2416	B07	12	sp|Q9P2G9|KLHL8_HUMAN
24143	10	NPRYFPMSL	NPRYFPM[147]SL/2	2414.3	B07	9	sp|Q6GYQ0|RGPA1_HUMAN
24054	10	APRDAYWIAM	APRDAYWIAM/2	2405.4	B07	10	sp|O75794|CD123_HUMAN
28863	12	LPRAVGTQTL	LPRAVGTQTL/2	2405.25	B07	10	sp|Q13596|SNX1_HUMAN
24000	10	SPISSNSHRSL	SPISSNSHRSL/2	2400	B07	11	sp|Q9NR09|BIRC6_HUMAN
28782	12	APGPGRKEL	APGPGRKEL/2	2398.5	B07	9	sp|Q9HBH0|RHOF_HUMAN
26354	11	KPRKLVNTI	KPRKLVNTI/2	2395.82	B07	9	sp|Q92900|RENT1_HUMAN
28740	12	VPRQPTVTSV	VPRQPTVTSV/2	2395	B07	10	sp|Q96HC4|PDLI5_HUMAN
23814	10	APIIRVGGAL	APIIRVGGAL/2	2381.4	B07	10	sp|O60566|BUB1B_HUMAN
23802	10	KPKSYSSSL	KPKSYSSSL/2	2380.2	B07	9	sp|Q9H0H0|INT2_HUMAN
28486	12	APEVAKSWAAL	APEVAKSWAAL/2	2373.83	B07	11	sp|Q96Q15|SMG1_HUMAN
28404	12	SPKPLVTPGSTL	SPKPLVTPGSTL/2	2367	B07	12	sp|Q9GZN2|TGIF2_HUMAN
23636	10	RPVPPPPSL	RPVPPPPSL/2	2363.6	B07	9	sp|P13051|UNG_HUMAN
23619	10	RPSGPGPEL	RPSGPGPEL/2	2361.9	B07	9	sp|P51531|SMCA2_HUMAN
25960	11	VPSKPPMSL	VPSKPPM[147]SL/2	2360	B07	9	sp|Q6AI12|ANR40_HUMAN
25895	11	NPRQAAYEM	NPRQAAYEM[147]/2	2354.09	B07	9	sp|Q9H0D6|XRN2_HUMAN
18761	8	MPYSNGRPAL	M[147]PYSNGRPAL/2	2345.12	B07	10	sp|Q16877|F264_HUMAN
25754	11	SPAGLKAVL	SPAGLKAVL/2	2341.27	B07	9	sp|Q6P9B9|INT5_HUMAN
28095	12	LPRTAISEL	LPRTAISEL/2	2341.25	B07	9	sp|Q9NRC8|SIR7_HUMAN
25732	11	KPSGTTKSL	KPSGTTKSL/2	2339.27	B07	9	sp|Q6Y7W6|PERQ2_HUMAN
23339	10	KPRDVSSVEL	KPRDVSSVEL/2	2333.9	B07	10	sp|Q01082|SPTB2_HUMAN
27963	12	APRLQSEVAEL	APRLQSEVAEL/2	2330.25	B07	11	sp|P53990|IST1_HUMAN
25579	11	GPTSRSAAL	GPTSRSAAL/2	2325.36	B07	9	sp|Q9BQ48|RM34_HUMAN
27880	12	HPRSPNVLSV	HPRSPNVLSV/2	2323.33	B07	10	sp|Q16665|HIF1A_HUMAN
27765	12	SPQEARNML	SPQEARNML/2	2313.75	B07	9	sp|P33240|CSTF2_HUMAN
23133	10	RPSGLHGDVSL	RPSGLHGDVSL/3	2313.3	B07	11	sp|Q9H6E5|STPAP_HUMAN
30068	13	LPRLQGEYRSL	LPRLQGEYRSL/3	2312.92	B07	11	sp|Q8NHU6|TDRD7_HUMAN
27754	12	APREPPPVEL	APREPPPVEL/2	2312.83	B07	10	sp|Q13105|ZBT17_HUMAN
23080	10	RPIKTATTL	RPIKTATTL/2	2308	B07	9	sp|Q96KC8|DNJC1_HUMAN
20736	9	RPYGSDKPWPSL	RPYGSDKPWPSL/3	2304	B07	12	sp|Q8N5F7|NKAP_HUMAN
20726	9	SPADHRGYASL	SPADHRGYASL/2	2302.89	B07	11	sp|Q06945|SOX4_HUMAN
20717	9	SPASRSISL	SPASRSISL/2	2301.89	B07	9	sp|P32970|CD70_HUMAN
29837	13	QPRGPDNSM	QPRGPDNSM[147]/2	2295.15	B07	9	sp|O75534|CSDE1_HUMAN
20628	9	RPSSKKTYSL	RPSSKKTYSL/3	2292	B07	10	sp|Q96Q89|KI20B_HUMAN
29699	13	NPRIPYTEL	NPRIPYTEL/2	2284.54	B07	9	sp|Q92830|KAT2A_HUMAN
25068	11	YPRQLESLIRL	YPRQLESLIRL/3	2278.91	B07	11	sp|P33991|MCM4_HUMAN
25036	11	SPSLPNISL	SPSLPNISL/2	2276	B07	9	sp|Q9UQL6|HDAC5_HUMAN
29585	13	APRQPGLMA	APRQPGLMA/2	2275.77	B07	9	sp|Q9Y6H1|CHCH2_HUMAN
25022	11	RPQLKGVVL	RPQLKGVVL/2	2274.73	B07	9	sp|O15235|RT12_HUMAN
27075	12	RPKAKGGLASL	RPKAKGGLASL/3	2256.25	B07	11	sp|Q92994|TF3B_HUMAN
29281	13	SPKQGVSL	SPKQGVSL/2	2252.39	B07	8	sp|Q63HN8|RN213_HUMAN
24731	11	APLPDGRSL	APLPDGRSL/2	2248.27	B07	9	sp|Q15648|MED1_HUMAN
17970	8	RPVPWNAL	RPVPWNAL/2	2246.25	B07	8	sp|Q05923|DUS2_HUMAN
22449	10	NPASRLTAL	NPASRLTAL/2	2244.9	B07	9	sp|P36894|BMR1A_HUMAN
29154	13	TPAIKRSIL	TPAIKRSIL/2	2242.61	B07	9	sp|P10242|MYB_HUMAN
24537	11	RPSDRNQKNSL	RPSDRNQKNSL/3	2230.64	B07	11	sp|Q9NRY4|RHG35_HUMAN
26692	12	KPKKGGGISF	KPKKGGGISF/2	2224.33	B07	10	sp|P55039|DRG2_HUMAN
26688	12	SPYPTKTQTM	SPYPTKTQTM[147]/2	2224	B07	10	sp|P04843|RPN1_HUMAN
28883	13	APKRPPSAF	APKRPPSAF/2	2221.77	B07	9	sp|B2RPK0|HGB1A_HUMAN
28729	13	VPREPPVSL	VPREPPVSL/2	2209.92	B07	9	sp|Q8TEQ8|PIGO_HUMAN
22067	10	RPSASTQAL	RPSASTQAL/2	2206.7	B07	9	sp|Q16531|DDB1_HUMAN
26437	12	NPRDLPLMAL	NPRDLPLM[147]AL/2	2203.08	B07	10	sp|P04818|TYSY_HUMAN
19791	9	YPRSLFPSL	YPRSLFPSL/2	2199	B07	9	sp|Q9NZJ4|SACS_HUMAN
24171	11	SPDSRASSL	SPDSRASSL/2	2197.36	B07	9	sp|Q9UHB6|LIMA1_HUMAN
26258	12	RPRLSAILF	RPRLSAILF/2	2188.17	B07	9	sp|Q9NSV4|DIAP3_HUMAN
24057	11	RPITPGTLRQL	RPITPGTLRQL/3	2187	B07	11	sp|Q9H3H3|CK068_HUMAN
24046	11	RPKYAGYSF	RPKYAGYSF/2	2186	B07	9	sp|P45983|MK08_HUMAN
26140	12	RPRIDLIVF	RPRIDLIVF/2	2178.33	B07	9	sp|Q9NSP4|CENPM_HUMAN
26139	12	HPRAYFMQL	HPRAYFMQL/2	2178.25	B07	9	sp|Q9Y2Y1|RPC10_HUMAN
19559	9	RPWLEGRHTL	RPWLEGRHTL/3	2173.22	B07	10	sp|Q9UI10|EI2BD_HUMAN
26023	12	RPRDALPRLL	RPRDALPRLL/3	2168.58	B07	10	sp|Q86Y56|HEAT2_HUMAN
25948	12	GPQAVRAAL	GPQAVRAAL/2	2162.33	B07	9	sp|O95602|RPA1_HUMAN
30260	14	TPRNTYKMTSL	TPRNTYKM[147]TSL/3	2161.43	B07	11	sp|P46013|KI67_HUMAN
23748	11	KPHSGFHVAF	KPHSGFHVAF/3	2158.91	B07	10	sp|Q8IYU8|MICU2_HUMAN
30185	14	LPRSLGKLTKL	LPRSLGKLTKL/3	2156.07	B07	11	sp|Q14160|SCRIB_HUMAN
28004	13	APRGTGIVSA	APRGTGIVSA/2	2154.15	B07	10	sp|P15880|RS2_HUMAN
17221	8	RPWSNSRGL	RPWSNSRGL/2	2152.62	B07	9	sp|Q9NRR8|C42S1_HUMAN
30061	14	SPRVPASET	SPRVPASET/2	2147.21	B07	9	sp|Q9HD15|SRA1_HUMAN
27906	13	SPALPGLKL	SPALPGLKL/2	2146.61	B07	9	sp|O14836|TR13B_HUMAN
17092	8	RPAPLSAEL	RPAPLSAEL/2	2136.5	B07	9	sp|P53602|MVD1_HUMAN
23460	11	APIGPHLQSM	APIGPHLQSM[147]/2	2132.73	B07	10	sp|Q14152|EIF3A_HUMAN
21323	10	RPAYRKVFL	RPAYRKVFL/3	2132.3	B07	9	sp|Q12772|SRBP2_HUMAN
21276	10	RPAAPGQTPL	RPAAPGQTPL/2	2127.6	B07	10	sp|Q12796|PNRC1_HUMAN
27656	13	VPQVKASAL	VPQVKASAL/2	2127.39	B07	9	sp|Q9NS93|TM7S3_HUMAN
25528	12	KPRNVVFVDM	KPRNVVFVDM[147]/2	2127.33	B07	10	sp|P34932|HSP74_HUMAN
29775	14	APRGDKEEL	APRGDKEEL/2	2126.79	B07	9	sp|P24001|IL32_HUMAN
29697	14	GPREAFRQL	GPREAFRQL/2	2121.21	B07	9	sp|P57086|SCND1_HUMAN
21149	10	NVRPPNTAL	NVRPPNTAL/2	2114.9	B07	9	sp|Q17RS7|GEN_HUMAN
27272	13	LPRPHASIMF	LPRPHASIM[147]F/2	2097.85	B07	10	sp|Q08211|DHX9_HUMAN
18849	9	APASRLLAL	APASRLLAL/2	2094.33	B07	9	sp|Q96S16|JMJD8_HUMAN
29206	14	LPRGSIPRSL	LPRGSIPRSL/3	2086.14	B07	10	sp|Q14566|MCM6_HUMAN
25029	12	RPPPPNSVI	RPPPPNSVI/2	2085.75	B07	9	sp|Q14186|TFDP1_HUMAN
22937	11	SPIEKSGVL	SPIEKSGVL/2	2085.18	B07	9	sp|Q8NG31|CASC5_HUMAN
24992	12	APGKKTSGL	APGKKTSGL/2	2082.67	B07	9	sp|Q9UBU8|MO4L1_HUMAN
27069	13	KPQPRPQTL	KPQPRPQTL/2	2082.23	B07	9	sp|Q9NR20|DYRK4_HUMAN
31179	15	SPKPPSQQL	SPKPPSQQL/2	2078.6	B07	9	sp|Q8IZD2|KMT2E_HUMAN
26941	13	SPHRPLAGL	SPHRPLAGL/2	2072.39	B07	9	sp|Q96AA3|RFT1_HUMAN
28946	14	SPKPPTSMF	SPKPPTSM[147]F/2	2067.57	B07	9	sp|Q99081|HTF4_HUMAN
26831	13	SPGTRPTAM	SPGTRPTAM[147]/2	2063.92	B07	9	sp|Q8WYA1|BMAL2_HUMAN
20632	10	RPLGKAASL	RPLGKAASL/2	2063.2	B07	9	sp|Q04637|IF4G1_HUMAN
28855	14	KPKATAKAAL	KPKATAKAAL/2	2061.07	B07	10	sp|Q14978|NOLC1_HUMAN
24657	12	SPAVERLISSL	SPAVERLISSL/2	2054.75	B07	11	sp|Q9BQ52|RNZ2_HUMAN
24644	12	RPAQPQEHPF	RPAQPQEHPF/3	2053.67	B07	10	sp|Q15437|SC23B_HUMAN
26645	13	MPRHFATKL	M[147]PRHFATKL/3	2049.61	B07	9	sp|O43286|B4GT5_HUMAN
26628	13	KPAGPPGIL	KPAGPPGIL/2	2048.31	B07	9	sp|P35579|MYH9_HUMAN
28654	14	SPGVGKTSL	SPGVGKTSL/2	2046.71	B07	9	sp|Q9NU22|MDN1_HUMAN
20459	10	RPTGGVGAV	RPTGGVGAV/2	2045.9	B07	9	sp|Q01581|HMCS1_HUMAN
28626	14	IPRDPSQQEL	IPRDPSQQEL/2	2044.71	B07	10	sp|P49327|FAS_HUMAN
24473	12	RPKYQFLSL	RPKYQFLSL/2	2039.42	B07	9	sp|O60443|DFNA5_HUMAN
26506	13	SPYLPRGDPVL	SPYLPRGDPVL/2	2038.92	B07	11	sp|P49754|VPS41_HUMAN
24383	12	APMIKKIAF	APM[147]IKKIAF/2	2031.92	B07	9	sp|Q5UIP0|RIF1_HUMAN
20234	10	RPVASSSTATL	RPVASSSTATL/2	2023.4	B07	11	sp|Q9H422|HIPK3_HUMAN
26293	13	GPALGRSFL	GPALGRSFL/2	2022.54	B07	9	sp|P32970|CD70_HUMAN
22216	11	APVPTTTLVL	APVPTTTLVL/2	2019.64	B07	10	sp|P18583|SON_HUMAN
26241	13	APVPPPTSL	APVPPPTSL/2	2018.54	B07	9	sp|Q9NTJ4|MA2C1_HUMAN
22202	11	RPSQNNTIGL	RPSQNNTIGL/2	2018.36	B07	10	sp|Q9H0H0|INT2_HUMAN
30202	15	NPRKVVGQQDL	NPRKVVGQQDL/3	2013.47	B07	11	sp|Q92609|TBCD5_HUMAN
28187	14	SPGPEKMAL	SPGPEKM[147]AL/2	2013.36	B07	9	sp|O75995|SASH3_HUMAN
26005	13	SPGLRDVAL	SPGLRDVAL/2	2000.38	B07	9	sp|Q13233|M3K1_HUMAN
25998	13	RPPPSPSGTL	RPPPSPSGTL/2	1999.85	B07	10	sp|Q14156|EFR3A_HUMAN
19979	10	RPSQFPHSL	RPSQFPHSL/2	1997.9	B07	9	sp|Q96RT8|GCP5_HUMAN
27946	14	NPRLIASSL	NPRLIASSL/2	1996.14	B07	9	sp|Q14C86|GAPD1_HUMAN
21901	11	KPMMPQESL	KPM[147]M[147]PQESL/2	1991	B07	9	sp|Q5JSZ5|PRC2B_HUMAN
23884	12	APSPPLSGL	APSPPLSGL/2	1990.33	B07	9	sp|Q96GQ5|CP058_HUMAN
21876	11	LPHSSAFTPL	LPHSSAFTPL/2	1988.73	B07	10	sp|Q96II8|LRCH3_HUMAN
21803	11	RPLFPGSTV	RPLFPGSTV/2	1982.09	B07	9	sp|Q00536|CDK16_HUMAN
23757	12	KPSPKTIAF	KPSPKTIAF/2	1979.75	B07	9	sp|Q9BRU9|UTP23_HUMAN
27714	14	HPRGGVIQSV	HPRGGVIQSV/2	1979.57	B07	10	sp|Q96B23|CR025_HUMAN
27699	14	QPRLFTMDL	QPRLFTM[147]DL/2	1978.5	B07	9	sp|Q9Y4A5|TRRAP_HUMAN
27603	14	HPRDPNLLL	HPRDPNLLL/2	1971.64	B07	9	sp|O75530|EED_HUMAN
25523	13	APARPGPAA	APARPGPAA/2	1963.31	B07	9	sp|Q04637|IF4G1_HUMAN
19596	10	KPAGPPGILAL	KPAGPPGILAL/2	1959.6	B07	11	sp|P35579|MYH9_HUMAN
21546	11	KPVSSNNSL	KPVSSNNSL/2	1958.73	B07	9	sp|O60318|GANP_HUMAN
17561	9	RPAGALVAL	RPAGALVAL/2	1951.22	B07	9	sp|Q2T9J0|TYSD1_HUMAN
21462	11	RPAEVGGMQL	RPAEVGGM[147]QL/2	1951.09	B07	10	sp|P33316|DUT_HUMAN
25312	13	SPALKTTRL	SPALKTTRL/2	1947.08	B07	9	sp|Q5SW79|CE170_HUMAN
25298	13	SPLKKEQPL	SPLKKEQPL/2	1946	B07	9	sp|Q53H80|AKIR2_HUMAN
25293	13	SPANPAHIL	SPANPAHIL/2	1945.62	B07	9	sp|Q9H967|WDR76_HUMAN
25285	13	LPALPTQAL	LPALPTQAL/2	1945	B07	9	sp|Q9P2Q2|FRM4A_HUMAN
25253	13	APNPYRQAIM	APNPYRQAIM[147]/2	1942.54	B07	10	sp|Q7RTS9|DYM_HUMAN
27114	14	SPNKHNRL	SPNKHNRL/2	1936.71	B07	8	sp|P13639|EF2_HUMAN
23171	12	SPMPPSEVKL	SPM[147]PPSEVKL/2	1930.92	B07	10	sp|Q9BWG6|SCNM1_HUMAN
28900	15	VPRASVPDGFL	VPRASVPDGFL/2	1926.67	B07	11	sp|P14174|MIF_HUMAN
21074	11	SPQAPTHFL	SPQAPTHFL/2	1915.82	B07	9	sp|P49773|HINT1_HUMAN
17219	9	KPSGVSAAL	KPSGVSAAL/2	1913.22	B07	9	sp|Q9Y3A4|RRP7A_HUMAN
28623	15	LPRSIGNLTQL	LPRSIGNLTQL/2	1908.2	B07	11	sp|Q6UWE0|LRSM1_HUMAN
26693	14	RPTLEGRELSL	RPTLEGRELSL/3	1906.64	B07	11	sp|Q9NU22|MDN1_HUMAN
26649	14	IPRSILMTTF	IPRSILM[147]TTF/2	1903.5	B07	10	sp|Q16531|DDB1_HUMAN
24714	13	APALARTLQSL	APALARTLQSL/2	1901.08	B07	11	sp|Q96HA7|TONSL_HUMAN
18907	10	RVRPLTKNAL	RVRPLTKNAL/3	1890.7	B07	10	sp|P15735|PHKG2_HUMAN
26382	14	SPNQSLRLGL	SPNQSLRLGL/2	1884.43	B07	10	sp|Q96B01|R51A1_HUMAN
18797	10	RPSSQYIVAL	RPSSQYIVAL/2	1879.7	B07	10	sp|Q8MH63|LAT1N_HUMAN
30013	16	SPRPPAEGF	SPRPPAEGF/2	1875.81	B07	9	sp|Q9BWN1|PRR14_HUMAN
22473	12	APAAPSATAL	APAAPSATAL/2	1872.75	B07	10	sp|Q8N5H7|SH2D3_HUMAN
24278	13	RPQSSRPVLL	RPQSSRPVLL/3	1867.54	B07	10	sp|Q8IWB7|WDFY1_HUMAN
24192	13	APVLPHTAV	APVLPHTAV/2	1860.92	B07	9	sp|Q6PCT2|FXL19_HUMAN
27854	15	SPRLLEVTNTI	SPRLLEVTNTI/2	1856.93	B07	11	sp|Q460N5|PAR14_HUMAN
29691	16	LPKQPPLAL	LPKQPPLAL/2	1855.69	B07	9	sp|Q96S59|RANB9_HUMAN
22266	12	MPRGVVVTL	MPRGVVVTL/2	1855.5	B07	9	sp|Q9ULT8|HECD1_HUMAN
25969	14	HPRDPNLLLSV	HPRDPNLLLSV/2	1854.93	B07	11	sp|O75530|EED_HUMAN
25935	14	VPAENKSVL	VPAENKSVL/2	1852.5	B07	9	sp|A2RUB6|CCD66_HUMAN
29568	16	SPRAPVSPLKF	SPRAPVSPLKF/3	1848	B07	11	sp|Q9UBS0|KS6B2_HUMAN
24023	13	APAPRPSLL	APAPRPSLL/2	1847.92	B07	9	sp|Q92620|PRP16_HUMAN
27680	15	FPNIPGKSL	FPNIPGKSL/2	1845.33	B07	9	sp|O15121|DEGS1_HUMAN
18386	10	KPATKTAEL	KPATKTAEL/2	1838.6	B07	9	sp|P18583|SON_HUMAN
20075	11	APYKSVTSL	APYKSVTSL/2	1825	B07	9	sp|Q6ZV73|FGD6_HUMAN
27375	15	SPGPRPVL	SPGPRPVL/2	1825	B07	8	sp|Q5VV67|PPRC1_HUMAN
27259	15	GPESRTISL	GPESRTISL/2	1817.27	B07	9	sp|Q5THK1|PR14L_HUMAN
19971	11	RPIMFRGEV	RPIM[147]FRGEV/3	1815.55	B07	9	sp|Q13283|G3BP1_HUMAN
21725	12	YPAAKRVKL	YPAAKRVKL/2	1810.42	B07	9	sp|P01106|MYC_HUMAN
27133	15	IPKTSGSEM	IPKTSGSEM[147]/2	1808.87	B07	9	sp|Q86T24|KAISO_HUMAN
27096	15	RPKALTQVL	RPKALTQVL/2	1806.4	B07	9	sp|Q9Y2Q5|LTOR2_HUMAN
26997	15	KPRKPITFV	KPRKPITFV/2	1799.8	B07	9	sp|Q86W50|MET16_HUMAN
25188	14	APSKPAASI	APSKPAASI/2	1799.14	B07	9	sp|O60264|SMCA5_HUMAN
26881	15	APASGKAKL	APASGKAKL/2	1792.07	B07	9	sp|P53007|TXTP_HUMAN
26748	15	APASPFRQL	APASPFRQL/2	1783.2	B07	9	sp|Q07021|C1QBP_HUMAN
21381	12	AARPATSTL	AARPATSTL/2	1781.75	B07	9	sp|Q04637|IF4G1_HUMAN
28453	16	LPRPPPPEM	LPRPPPPEM[147]/2	1778.31	B07	9	sp|Q00325|MPCP_HUMAN
24722	14	APGKRILVL	APGKRILVL/2	1765.86	B07	9	sp|O60870|KIN17_HUMAN
24679	14	APNYRLKSL	APNYRLKSL/2	1762.79	B07	9	sp|Q9HBM6|TAF9B_HUMAN
26401	15	KPVYPGQTL	KPVYPGQTL/2	1760.07	B07	9	sp|P51659|DHB4_HUMAN
28144	16	RPREAEVRF	RPREAEVRF/3	1759	B07	9	sp|Q13438|OS9_HUMAN
22848	13	APARASVIL	APARASVIL/2	1757.54	B07	9	sp|Q9NUQ8|ABCF3_HUMAN
24576	14	APSGGKVTVL	APSGGKVTVL/2	1755.43	B07	10	sp|Q9BV20|MTNA_HUMAN
22789	13	RPSGAATTTAA	RPSGAATTTAA/2	1753	B07	11	sp|Q86TM6|SYVN1_HUMAN
24530	14	RPITERSLL	RPITERSLL/3	1752.14	B07	9	sp|Q9UHY8|FEZ2_HUMAN
26253	15	IPRITIEM	IPRITIEM[147]/2	1750.2	B07	8	sp|P11388|TOP2A_HUMAN
31478	18	SPKIPGIDL	SPKIPGIDL/2	1748.78	B07	9	sp|Q15034|HERC3_HUMAN
26197	15	APSGTRVVQVL	APSGTRVVQVL/2	1746.47	B07	11	sp|Q9UN70|PCDGK_HUMAN
27881	16	APAKPPRHL	APAKPPRHL/2	1742.56	B07	9	sp|Q5JSH3|WDR44_HUMAN
26121	15	KPRNVQILNM	KPRNVQILNM[147]/2	1741.4	B07	10	sp|Q5SRD1|TI23B_HUMAN
26098	15	SPRYIFTML	SPRYIFTM[147]L/2	1739.87	B07	9	sp|Q02880|TOP2B_HUMAN
27836	16	TPASSRAQTL	TPASSRAQTL/2	1739.75	B07	10	sp|Q01082|SPTB2_HUMAN
22587	13	GPAPRVLSL	GPAPRVLSL/2	1737.46	B07	9	sp|P49750|YLPM1_HUMAN
24314	14	RPADPEKNQSL	RPADPEKNQSL/3	1736.71	B07	11	sp|Q9H8H0|NOL11_HUMAN
17363	10	VPMFRNVSL	VPM[147]FRNVSL/2	1736.3	B07	9	sp|O14980|XPO1_HUMAN
25933	15	SPTGRYTTL	SPTGRYTTL/2	1728.87	B07	9	sp|Q9NTI2|AT8A2_HUMAN
22342	13	RPQKVCSFL	RPQKVCSFL/2	1718.62	B07	9	sp|P63218|GBG5_HUMAN
25751	15	RPEEGRPVV	RPEEGRPVV/2	1716.73	B07	9	sp|P27816|MAP4_HUMAN
24034	14	LPHNRLVSL	LPHNRLVSL/2	1716.71	B07	9	sp|Q96CX6|LRC58_HUMAN
25728	15	MPKPPNLIM	M[147]PKPPNLIM[147]/2	1715.2	B07	9	sp|P46100|ATRX_HUMAN
29104	17	RPKVPVLQL	RPKVPVLQL/2	1712	B07	9	sp|P56192|SYMC_HUMAN
22166	13	RPSPPVQSV	RPSPPVQSV/2	1705.08	B07	9	sp|Q5VV67|PPRC1_HUMAN
20348	12	RPSQAAPAV	RPSQAAPAV/2	1695.67	B07	9	sp|P40222|TXLNA_HUMAN
25368	15	TPHLRNLAV	TPHLRNLAV/2	1691.2	B07	9	sp|Q5JS54|PSMG4_HUMAN
23668	14	KPRDVSSVELLM	KPRDVSSVELLM[147]/3	1690.57	B07	12	sp|Q01082|SPTB2_HUMAN
28647	17	RPKETDHKSL	RPKETDHKSL/3	1685.12	B07	10	sp|Q9BVI0|PHF20_HUMAN
20219	12	LVRQISSAM	LVRQISSAM[147]/2	1684.92	B07	9	sp|Q9ULT0|TTC7A_HUMAN
26922	16	TPEEVRLPL	TPEEVRLPL/2	1682.62	B07	9	sp|Q9UIF9|BAZ2A_HUMAN
23490	14	RPQAPATVGL	RPQAPATVGL/2	1677.86	B07	10	sp|Q15370|ELOB_HUMAN
26829	16	APSPPAVDL	APSPPAVDL/2	1676.81	B07	9	sp|Q04637|IF4G1_HUMAN
16757	10	LPMGALPQGPM	LPM[147]GALPQGPM[147]/2	1675.7	B07	11	sp|P04233|HG2A_HUMAN
26797	16	LPKTGTVSL	LPKTGTVSL/2	1674.81	B07	9	sp|P49327|FAS_HUMAN
25055	15	LPQLPLAAL	LPQLPLAAL/2	1670.33	B07	9	sp|P23610|F8I2_HUMAN
24847	15	MPSQFRDIL	M[147]PSQFRDIL/2	1656.47	B07	9	sp|Q09472|EP300_HUMAN
26416	16	SPNGTIRNIL	SPNGTIRNIL/2	1651	B07	10	sp|O75874|IDHC_HUMAN
21453	13	LPAPKWTEL	LPAPKWTEL/2	1650.23	B07	9	sp|P52333|JAK3_HUMAN
19794	12	RPYSDSTAKL	RPYSDSTAKL/3	1649.5	B07	10	sp|Q86YD1|PTOV1_HUMAN
26385	16	IPRLIVSQL	IPRLIVSQL/2	1649.06	B07	9	sp|Q9BXW9|FACD2_HUMAN
26341	16	APKLGVAL	APKLGVAL/2	1646.31	B07	8	sp|Q2VPB7|AP5B1_HUMAN
27949	17	GPSVLRSTL	GPSVLRSTL/2	1644.06	B07	9	sp|O75376|NCOR1_HUMAN
27914	17	TPRDLVLRSL	TPRDLVLRSL/3	1642	B07	10	sp|B0I1T2|MYO1G_HUMAN
21304	13	RPIFPGKHYL	RPIFPGKHYL/3	1638.77	B07	10	sp|P28482|MK01_HUMAN
19641	12	NVRIATTAL	NVRIATTAL/2	1636.75	B07	9	sp|Q13571|LAPM5_HUMAN
22826	14	APRTVLLLL	APRTVLLLL/2	1630.43	B07	9	sp|P01889|1B07_HUMAN
24438	15	RPHHKILDM	RPHHKILDM[147]/3	1629.2	B07	9	sp|Q08J23|NSUN2_HUMAN
19508	12	SPIGRSCTL	SPIGRSCTL/2	1625.67	B07	9	sp|Q92871|PMM1_HUMAN
27543	17	GPKGHVSSL	GPKGHVSSL/2	1620.18	B07	9	sp|Q9H9L3|I20L2_HUMAN
19440	12	RPYAPINANAI	RPYAPINANAI/2	1620	B07	11	sp|O94776|MTA2_HUMAN
27483	17	KPTGTPKAL	KPTGTPKAL/2	1616.65	B07	9	sp|Q99685|MGLL_HUMAN
27456	17	SPGPSRPGL	SPGPSRPGL/2	1615.06	B07	9	sp|Q92888|ARHG1_HUMAN
27411	17	NPKESSSSL	NPKESSSSL/2	1612.41	B07	9	sp|Q12789|TF3C1_HUMAN
20840	13	SPANTRYLFL	SPANTRYLFL/2	1603.08	B07	10	sp|Q08209|PP2BA_HUMAN
27214	17	SPAIKDSTM	SPAIKDSTM[147]/2	1600.82	B07	9	sp|P78346|RPP30_HUMAN
25550	16	IPRPVDGVEV	IPRPVDGVEV/2	1596.88	B07	10	sp|P26368|U2AF2_HUMAN
19152	12	FPNKQGYVL	FPNKQGYVL/2	1596	B07	9	sp|O43684|BUB3_HUMAN
15951	10	RVRKLPSTTL	RVRKLPSTTL/2	1595.1	B07	10	sp|Q15418|KS6A1_HUMAN
23914	15	APAAPGLSL	APAAPGLSL/2	1594.27	B07	9	sp|Q9UNY4|TTF2_HUMAN
20708	13	APAPKAYVL	APAPKAYVL/2	1592.92	B07	9	sp|A6NDG6|PGP_HUMAN
23866	15	APPSRLASAL	APPSRLASAL/2	1591.07	B07	10	sp|Q9UHR6|ZNHI2_HUMAN
26978	17	SPQDKRTLL	SPQDKRTLL/2	1586.94	B07	9	sp|Q8TC07|TBC15_HUMAN
19039	12	LARPASAAL	LARPASAAL/2	1586.58	B07	9	sp|P40926|MDHM_HUMAN
26958	17	GPNPKSSRTTL	GPNPKSSRTTL/3	1585.77	B07	11	sp|P17480|UBF1_HUMAN
23763	15	KPSLPFTSL	KPSLPFTSL/2	1584.2	B07	9	sp|P31785|IL2RG_HUMAN
22133	14	SPSDRPLSL	SPSDRPLSL/2	1580.93	B07	9	sp|Q12769|NU160_HUMAN
23711	15	RPQSGANGL	RPQSGANGL/2	1580.73	B07	9	sp|Q8WVX3|CD003_HUMAN
29972	19	SPGRPGKSV	SPGRPGKSV/2	1577.47	B07	9	sp|Q92918|M4K1_HUMAN
29766	19	SPRTPVSPVKF	SPRTPVSPVKF/3	1566.63	B07	11	sp|P23443|KS6B1_HUMAN
29704	19	NPRNTEAVTL	NPRNTEAVTL/2	1563.37	B07	10	sp|Q9UKF6|CPSF3_HUMAN
17164	11	RPLYKNIVL	RPLYKNIVL/2	1560.36	B07	9	sp|P61158|ARP3_HUMAN
24903	16	FPRLPPASV	FPRLPPASV/2	1556.44	B07	9	sp|Q6ZRI6|CO039_HUMAN
26421	17	APSGQHSQAQL	APSGQHSQAQL/2	1554.18	B07	11	sp|O00411|RPOM_HUMAN
27789	18	APGQRVGML	APGQRVGM[147]L/2	1543.83	B07	9	sp|P36956|SRBP1_HUMAN
18487	12	RPYTNKVITL	RPYTNKVITL/3	1540.58	B07	10	sp|Q14004|CDK13_HUMAN
15382	10	SPWLLRVEL	SPWLLRVEL/2	1538.2	B07	9	sp|P24928|RPB1_HUMAN
21468	14	RPQEVPAEAL	RPQEVPAEAL/2	1533.43	B07	10	sp|Q9Y2I1|NISCH_HUMAN
21451	14	HPAAKMIVM	HPAAKMIVM/2	1532.21	B07	9	sp|P50990|TCPQ_HUMAN
18382	12	RPADSMLNVL	RPADSM[147]LNVL/2	1531.83	B07	10	sp|Q9BTL4|IER2_HUMAN
26020	17	LPRDPSSEV	LPRDPSSEV/2	1530.59	B07	9	sp|Q8IY18|SMC5_HUMAN
27414	18	TPQSNRPVM	TPQSNRPVM[147]/2	1523	B07	9	sp|P24928|RPB1_HUMAN
27401	18	SPSVDKARAEL	SPSVDKARAEL/3	1522.28	B07	11	sp|Q9BY66|KDM5D_HUMAN
25859	17	SPRSYQDFFEAI	SPRSYQDFFEAI/2	1521.12	B07	12	sp|P18850|ATF6A_HUMAN
22786	15	KPAEAPRLQL	KPAEAPRLQL/3	1519.07	B07	10	sp|Q14690|RRP5_HUMAN
22686	15	APINKAGSFL	APINKAGSFL/2	1512.4	B07	10	sp|P51451|BLK_HUMAN
25566	17	LPNPKRLLAF	LPNPKRLLAF/3	1503.88	B07	10	sp|Q13009|TIAM1_HUMAN
25489	17	LPRGSSPSV	LPRGSSPSV/2	1499.35	B07	9	sp|Q9GZN2|TGIF2_HUMAN
28423	19	KPKKPVGAA	KPKKPVGAA/2	1495.95	B07	9	sp|P16403|H12_HUMAN
25430	17	SPNRSFTEM	SPNRSFTEM[147]/2	1495.88	B07	9	sp|Q9Y263|PLAP_HUMAN
23880	16	IPKPLNPAL	IPKPLNPAL/2	1492.5	B07	9	sp|P62952|BLCAP_HUMAN
17887	12	SPYLRPLTL	SPYLRPLTL/2	1490.58	B07	9	sp|O95848|NUD14_HUMAN
20819	14	RPFPKLRIL	RPFPKLRIL/3	1487.07	B07	9	sp|P04818|TYSY_HUMAN
19305	13	SPQKVTLYL	SPQKVTLYL/2	1485	B07	9	sp|P05107|ITB2_HUMAN
26708	18	APRTVALTA	APRTVALTA/2	1483.78	B07	9	sp|P04440|DPB1_HUMAN
29619	20	LPRPVPQNL	LPRPVPQNL/2	1480.95	B07	9	sp|Q9NWF9|RN216_HUMAN
28093	19	APAPAAQRL	APAPAAQRL/2	1478.58	B07	9	sp|Q99504|EYA3_HUMAN
23469	16	KPVAPSNVL	KPVAPSNVL/2	1466.81	B07	9	sp|Q9NVU0|RPC5_HUMAN
24899	17	FPVLPGSHL	FPVLPGSHL/2	1464.65	B07	9	sp|Q07864|DPOE1_HUMAN
26352	18	LPAPPTQNM	LPAPPTQNM[147]/2	1464	B07	9	sp|O75177|CREST_HUMAN
23365	16	SPALNKMFCQL	SPALNKM[147]FCQL/2	1460.31	B07	11	sp|P04637|P53_HUMAN
29199	20	TPSGSREGSL	TPSGSREGSL/2	1459.95	B07	10	sp|Q6P3S6|FBX42_HUMAN
29121	20	APSQQRQQI	APSQQRQQI/2	1456.05	B07	9	sp|Q6P2Q9|PRP8_HUMAN
28879	20	HPESERISM	HPESERISM[147]/2	1443.95	B07	9	sp|Q01082|SPTB2_HUMAN
27435	19	LPRALLTQL	LPRALLTQL/2	1443.95	B07	9	sp|Q12851|M4K2_HUMAN
27395	19	RPKYPGIKF	RPKYPGIKF/3	1441.84	B07	9	sp|P45984|MK09_HUMAN
20175	14	RPQDGVAVL	RPQDGVAVL/2	1441.07	B07	9	sp|O00159|MYO1C_HUMAN
23039	16	RPRSVPFIHV	RPRSVPFIHV/3	1439.94	B07	10	sp|O75427|LRCH4_HUMAN
25889	18	APASASQKL	APASASQKL/2	1438.28	B07	9	sp|Q14807|KIF22_HUMAN
28724	20	LPRVADILTQL	LPRVADILTQL/2	1436.2	B07	11	sp|Q9BZZ5|API5_HUMAN
25833	18	SPNLRLLDL	SPNLRLLDL/2	1435.17	B07	9	sp|Q8N531|FBXL6_HUMAN
30121	21	LPKPPFGML	LPKPPFGM[147]L/2	1434.33	B07	9	sp|Q9Y2X9|ZN281_HUMAN
27159	19	LPHAPGVQM	LPHAPGVQM[147]/2	1429.42	B07	9	sp|Q13547|HDAC1_HUMAN
18571	13	SPLTKSISL	SPLTKSISL/2	1428.54	B07	9	sp|Q12802|AKP13_HUMAN
24203	17	LPSLPTAEL	LPSLPTAEL/2	1423.71	B07	9	sp|Q6ZNJ1|NBEL2_HUMAN
19777	14	LPLPNFSSL	LPLPNFSSL/2	1412.64	B07	9	sp|P08670|VIME_HUMAN
21106	15	LPSDLRTISL	LPSDLRTISL/2	1407.07	B07	10	sp|Q9C0A6|SETD5_HUMAN
22509	16	RPSLRLQLL	RPSLRLQLL/2	1406.81	B07	9	sp|Q7L2H7|EIF3M_HUMAN
14023	10	RPAPLPAAV	RPAPLPAAV/2	1402.3	B07	9	sp|Q6ZRI6|CO039_HUMAN
28037	20	APRNSAELTVI	APRNSAELTVI/2	1401.85	B07	11	sp|O60566|BUB1B_HUMAN
23652	17	RPQQIPVL	RPQQIPVL/2	1391.29	B07	8	sp|Q15751|HERC1_HUMAN
22235	16	SPSGDRPAV	SPSGDRPAV/2	1389.69	B07	9	sp|Q8IXZ2|ZC3H3_HUMAN
23551	17	SPAQVKTSV	SPAQVKTSV/2	1385.35	B07	9	sp|Q13428|TCOF_HUMAN
26232	19	RPHAPHSPIKF	RPHAPHSPIKF/3	1380.63	B07	11	sp|P52797|EFNA3_HUMAN
23359	17	KPRPIIPML	KPRPIIPM[147]L/2	1374.06	B07	9	sp|O94953|KDM4B_HUMAN
30147	22	KPEEQRKTL	KPEEQRKTL/3	1370.32	B07	9	sp|Q13823|NOG2_HUMAN
19146	14	ATREAGSAL	ATREAGSAL/2	1367.57	B07	9	sp|P20248|CCNA2_HUMAN
28537	21	APKKSEAAV	APKKSEAAV/2	1358.9	B07	9	sp|Q9NR20|DYRK4_HUMAN
21730	16	SPAAKSPSAQL	SPAAKSPSAQL/2	1358.12	B07	11	sp|Q14203|DCTN1_HUMAN
27147	20	RPKTFGMDM	RPKTFGMDM[147]/2	1357.35	B07	9	sp|Q08116|RGS1_HUMAN
19001	14	VPAARSILAL	VPAARSILAL/2	1357.21	B07	10	sp|O94906|PRP6_HUMAN
25779	19	VPQPHPQTL	VPQPHPQTL/2	1356.79	B07	9	sp|O14776|TCRG1_HUMAN
18870	14	RPYSNVSNL	RPYSNVSNL/2	1347.86	B07	9	sp|O95248|MTMR5_HUMAN
28199	21	NPRNFSDNQL	NPRNFSDNQL/2	1342.81	B07	10	sp|P37802|TAGL2_HUMAN
28072	21	NPRFQEADSPTL	NPRFQEADSPTL/2	1336.76	B07	12	sp|P26010|ITB7_HUMAN
23996	18	NPASPPLSL	NPASPPLSL/2	1333.11	B07	9	sp|Q13155|AIMP2_HUMAN
21300	16	APVGVHPSL	APVGVHPSL/2	1331.25	B07	9	sp|A6NFQ2|F115C_HUMAN
29213	22	LPRLTPPVL	LPRLTPPVL/2	1327.86	B07	9	sp|P50990|TCPQ_HUMAN
26540	20	SPQGVSKTL	SPQGVSKTL/2	1327	B07	9	sp|Q14699|RFTN1_HUMAN
27810	21	RPKAQPTTL	RPKAQPTTL/2	1324.29	B07	9	sp|Q6P2C8|MED27_HUMAN
23817	18	APAAGSKVL	APAAGSKVL/2	1323.17	B07	9	sp|Q9Y2U8|MAN1_HUMAN
27723	21	NPRLNILDTL	NPRLNILDTL/2	1320.14	B07	10	sp|Q13200|PSMD2_HUMAN
29041	22	SPNQARAQA	SPNQARAQA/2	1320.05	B07	9	sp|P26599|PTBP1_HUMAN
21064	16	RPYPQVQML	RPYPQVQM[147]L/2	1316.5	B07	9	sp|Q9H0E3|SP130_HUMAN
19735	15	SPISHFLDL	SPISHFLDL/2	1315.67	B07	9	sp|Q9NVI1|FANCI_HUMAN
23655	18	APGPITMDL	APGPITM[147]DL/2	1314.17	B07	9	sp|P52566|GDIR2_HUMAN
22308	17	APIAKVGVL	APIAKVGVL/2	1312.23	B07	9	sp|Q9UHB6|LIMA1_HUMAN
23562	18	HPGPVNSEL	HPGPVNSEL/2	1309	B07	9	sp|Q6UX07|DHR13_HUMAN
19528	15	LPIAASSSL	LPIAASSSL/2	1301.87	B07	9	sp|Q9GZS3|WDR61_HUMAN
19458	15	RPHTVLTVI	RPHTVLTVI/2	1297.2	B07	9	sp|Q12788|TBL3_HUMAN
28510	22	IPRVVQEGDVL	IPRVVQEGDVL/2	1295.91	B07	11	sp|Q13608|PEX6_HUMAN
27174	21	APAVPALRL	APAVPALRL/2	1294	B07	9	sp|Q9ULQ1|TPC1_HUMAN
23287	18	SPSNTRYLFL	SPSNTRYLFL/2	1293.72	B07	10	sp|P48454|PP2BC_HUMAN
25651	20	APARPVNCL	APARPVNCL/2	1282.55	B07	9	sp|O14562|UBFD1_HUMAN
28180	22	TPSPARSTHL	TPSPARSTHL/2	1280.91	B07	10	sp|Q96DF8|DGC14_HUMAN
31915	25	SPRTPPQRF	SPRTPPQRF/3	1276.6	B07	9	sp|Q14CS0|UBX2B_HUMAN
26665	21	RPCPPRLLF	RPCPPRLLF/2	1269.76	B07	9	sp|Q8ND04|SMG8_HUMAN
26513	21	LPRTIFPTSTI	LPRTIFPTSTI/2	1262.52	B07	11	sp|Q99590|SCAFB_HUMAN
25173	20	YPKRPLLGL	YPKRPLLGL/2	1258.65	B07	9	sp|Q9GZR7|DDX24_HUMAN
23554	19	RPLSKTVRF	RPLSKTVRF/2	1239.68	B07	9	sp|P62280|RS11_HUMAN
23522	19	RPKDYANTL	RPKDYANTL/2	1238	B07	9	sp|Q8IYB7|DI3L2_HUMAN
24753	20	APRTVLLLLSA	APRTVLLLLSA/2	1237.65	B07	11	sp|P01889|1B07_HUMAN
23467	19	KPVNPSPLSQL	KPVNPSPLSQL/2	1235.11	B07	11	sp|O14734|ACOT8_HUMAN
25878	21	NPNMRLSQL	NPNM[147]RLSQL/2	1232.29	B07	9	sp|Q96CT7|CC124_HUMAN
23401	19	APSQQRLVVV	APSQQRLVVV/2	1231.63	B07	10	sp|Q9H6Q4|NARFL_HUMAN
18464	15	VPAPVPLMSL	VPAPVPLM[147]SL/2	1230.93	B07	10	sp|Q9UQ35|SRRM2_HUMAN
19683	16	RPAPAAPLL	RPAPAAPLL/2	1230.19	B07	9	sp|Q96PM9|Z385A_HUMAN
25777	21	VPNQKRLTLL	VPNQKRLTLL/2	1227.48	B07	10	sp|O60488|ACSL4_HUMAN
15946	13	RPFERTITM	RPFERTITM[147]/3	1226.62	B07	9	sp|O00560|SDCB1_HUMAN
28065	23	NPHEPWNRL	NPHEPWNRL/3	1220.22	B07	9	sp|Q8WXX7|AUTS2_HUMAN
24342	20	IARLPSSTL	IARLPSSTL/2	1217.1	B07	9	sp|Q86Y91|KI18B_HUMAN
25547	21	SPGERATL	SPGERATL/2	1216.52	B07	8	sp|P01621|KV303_HUMAN
27846	23	LPQANRDTL	LPQANRDTL/2	1210.7	B07	9	sp|Q9H0H5|RGAP1_HUMAN
25369	21	KPQSKELTL	KPQSKELTL/2	1208.05	B07	9	sp|Q9H4H8|FA83D_HUMAN
25304	21	GPASRVSQL	GPASRVSQL/2	1204.95	B07	9	sp|Q9H7N4|SFR19_HUMAN
25280	21	QPMNPTQNM	QPM[147]NPTQNM[147]/2	1203.81	B07	9	sp|Q14444|CAPR1_HUMAN
28797	24	NPKNPGLWL	NPKNPGLWL/2	1199.88	B07	9	sp|O94906|PRP6_HUMAN
22708	19	HPTSHVSLL	HPTSHVSLL/2	1195.16	B07	9	sp|Q9NVR0|KLH11_HUMAN
23875	20	SPNSKVNTL	SPNSKVNTL/2	1193.75	B07	9	sp|P40939|ECHA_HUMAN
22662	19	RPKPIITSV	RPKPIITSV/2	1192.74	B07	9	sp|P0CG13|CTF8_HUMAN
17740	15	FPHLVHAEL	FPHLVHAEL/2	1182.67	B07	9	sp|Q8IXI1|MIRO2_HUMAN
22350	19	RPVQKLIRL	RPVQKLIRL/3	1176.32	B07	9	sp|Q5W0V3|F16B1_HUMAN
14045	12	KPSESIYSAL	KPSESIYSAL/2	1170.42	B07	10	sp|Q6SJ93|F111B_HUMAN
16361	14	RPYEPINSI	RPYEPINSI/2	1168.64	B07	9	sp|Q8WUA4|TF3C2_HUMAN
26876	23	RPKLIGEEL	RPKLIGEEL/2	1168.52	B07	9	sp|P54252|ATX3_HUMAN
27767	24	APYSRPKQL	APYSRPKQL/2	1156.96	B07	9	sp|Q86V81|THOC4_HUMAN
21921	19	RPYPVMRKI	RPYPVMRKI/3	1153.74	B07	9	sp|Q8TEZ7|MPRB_HUMAN
25323	22	GPSFKASSL	GPSFKASSL/2	1151.05	B07	9	sp|Q96PE3|INP4A_HUMAN
20704	18	APSLKQFSL	APSLKQFSL/2	1150.22	B07	9	sp|Q9UGJ1|GCP4_HUMAN
25162	22	LPASPAHQL	LPASPAHQL/2	1143.73	B07	9	sp|Q8TEK3|DOT1L_HUMAN
22849	20	SPQGRVMTI	SPQGRVM[147]TI/2	1142.45	B07	9	sp|Q15365|PCBP1_HUMAN
12549	11	SPMGVDHMSGL	SPM[147]GVDHM[147]SGL/2	1140.82	B07	11	sp|Q15717|ELAV1_HUMAN
23895	21	KPRDVSSVELL	KPRDVSSVELL/2	1137.86	B07	11	sp|Q01082|SPTB2_HUMAN
22681	20	LPSASHFSQL	LPSASHFSQL/2	1134.05	B07	10	sp|Q9Y520|PRC2C_HUMAN
27197	24	KPRSLQTGF	KPRSLQTGF/2	1133.21	B07	9	sp|Q9H0Z9|RBM38_HUMAN
26000	23	GPQSGKSAV	GPQSGKSAV/2	1130.43	B07	9	sp|Q14667|K0100_HUMAN
16950	15	KPIEASIRGEL	KPIEASIRGEL/3	1130	B07	11	sp|P08133|ANXA6_HUMAN
22460	20	LPLARVKAL	LPLARVKAL/2	1123	B07	9	sp|Q9NR33|DPOE4_HUMAN
19036	17	APSHLMALLTL	APSHLM[147]ALLTL/2	1119.77	B07	11	sp|Q9NZ32|ARP10_HUMAN
[truncated: 394 more rows]

## Sheet: DDA_n=2
Figure 1-source data 1. Comparative analysis of DDA and SWATH-MS for the identification of HLA class I peptides. List of JY HLA-A and -B peptides that were identified by DDA (n=2) and then annotated using the computational workflow (1% pep-level FDR).
NetMHC (IC50; nM)
A02	B07	Peptide	Peptide_mod_ion	factor	Allele	Length	Protein
1	18187	FLMDFIHQV	FLM[147]DFIHQV/2	18187	A02	9	sp|Q8WUM0|NU133_HUMAN
2	21860	FLNDEVWNL	FLNDEVWNL/2	10930	A02	9	sp|O95825|QORL1_HUMAN
2	21672	LLFDLIPVV	LLFDLIPVV/2	10836	A02	9	sp|Q8N9M5|TM102_HUMAN
2	20634	ILVDWLVEV	ILVDWLVEV/2	10317	A02	9	sp|P20248|CCNA2_HUMAN
2	20500	FLFDGSPTYV	FLFDGSPTYV/2	10250	A02	10	sp|P49327|FAS_HUMAN
2	20489	ILIDWLVQV	ILIDWLVQV/2	10244.5	A02	9	sp|P14635|CCNB1_HUMAN
2	20327	VLLGHIFYV	VLLGHIFYV/2	10163.5	A02	9	sp|Q9Y6X3|SCC4_HUMAN
2	19369	LLIDIIHFL	LLIDIIHFL/2	9684.5	A02	9	sp|Q86VV8|RTTN_HUMAN
2	18270	KLWDLLYKL	KLWDLLYKL/2	9135	A02	9	sp|Q9H6A9|PCX3_HUMAN
2	18091	SLFEGTWYL	SLFEGTWYL/2	9045.5	A02	9	sp|Q01581|HMCS1_HUMAN
2	17989	YLADLYHFV	YLADLYHFV/2	8994.5	A02	9	sp|Q9Y3L3|3BP1_HUMAN
2	17734	RLYDGLFKV	RLYDGLFKV/2	8867	A02	9	sp|Q16531|DDB1_HUMAN
2	17616	FLIPFVITV	FLIPFVITV/2	8808	A02	9	sp|Q86VZ1|P2RY8_HUMAN
2	16810	MLIGEIFEL	M[147]LIGEIFEL/2	8405	A02	9	sp|Q7Z3C6|ATG9A_HUMAN
2	16672	YLWDLDHGFAGV	YLWDLDHGFAGV/2	8336	A02	12	sp|P47756|CAPZB_HUMAN
2	16232	YLNDLIHSV	YLNDLIHSV/2	8116	A02	9	sp|O43572|AKA10_HUMAN
2	16054	LLWDYVYQL	LLWDYVYQL/2	8027	A02	9	sp|Q9Y603|ETV7_HUMAN
1	8017	KLMDHIYAV	KLM[147]DHIYAV/2	8017	A02	9	sp|Q9UP83|COG5_HUMAN
2	15148	YLNDFTHEI	YLNDFTHEI/2	7574	A02	9	sp|Q9H5V7|IKZF5_HUMAN
2	15007	FLFDHLLTL	FLFDHLLTL/2	7503.5	A02	9	sp|Q7L2H7|EIF3M_HUMAN
3	22354	KLLEKLYKV	KLLEKLYKV/3	7451.33	A02	9	sp|Q15034|HERC3_HUMAN
3	22254	GLIDEIYGI	GLIDEIYGI/2	7418	A02	9	sp|Q96AX1|VP33A_HUMAN
3	22088	KLLEYIEEI	KLLEYIEEI/2	7362.67	A02	9	sp|O75330|HMMR_HUMAN
3	22022	VLSELLWQV	VLSELLWQV/2	7340.67	A02	9	sp|Q93008|USP9X_HUMAN
3	21787	FMTTNVPNV	FM[147]TTNVPNV/2	7262.33	A02	9	sp|P35611|ADDA_HUMAN
3	21658	LMDHTIPEV	LM[147]DHTIPEV/2	7219.33	A02	9	sp|O00560|SDCB1_HUMAN
3	21482	NLLDLLTEV	NLLDLLTEV/2	7160.67	A02	9	sp|Q9H3U1|UN45A_HUMAN
3	21472	FMFDEKLVTV	FM[147]FDEKLVTV/2	7157.33	A02	10	sp|O00743|PPP6_HUMAN
3	21426	TLADVLYHV	TLADVLYHV/2	7142	A02	9	sp|Q9UBL3|ASH2L_HUMAN
3	21364	YLLQEIYGI	YLLQEIYGI/2	7121.33	A02	9	sp|O60291|MGRN1_HUMAN
3	21158	YLIELIDRV	YLIELIDRV/2	7052.67	A02	9	sp|P78536|ADA17_HUMAN
2	13930	FLFDNDFPAL	FLFDNDFPAL/2	6965	A02	10	sp|P07902|GALT_HUMAN
2	13808	FMMPRIVNV	FM[147]M[147]PRIVNV/2	6904	A02	9	sp|Q8IWI9|MGAP_HUMAN
2	13580	FLIPKFFEL	FLIPKFFEL/2	6790	A02	9	sp|Q9P1A2|PP4RL_HUMAN
3	20096	VLIKWFPEV	VLIKWFPEV/2	6698.67	A02	9	sp|Q9HBH0|RHOF_HUMAN
3	20026	KLLFWVTEV	KLLFWVTEV/2	6675.33	A02	9	sp|Q8NFH4|NUP37_HUMAN
2	13322	ILMEHIHKL	ILMEHIHKL/2	6661	A02	9	sp|P84098|RL19_HUMAN
3	19867	FLEKLLPPV	FLEKLLPPV/2	6622.33	A02	9	sp|O95372|LYPA2_HUMAN
3	19786	LMVDHVTEV	LMVDHVTEV/2	6595.33	A02	9	sp|Q9HD15|SRA1_HUMAN
3	19735	FLFPVYPLI	FLFPVYPLI/2	6578.33	A02	9	sp|Q9H6U8|ALG9_HUMAN
3	19604	FLDKQGFYV	FLDKQGFYV/2	6534.67	A02	9	sp|Q9UBC2|EP15R_HUMAN
3	19460	ILLPSVFGV	ILLPSVFGV/2	6486.67	A02	9	sp|Q53EU6|GPAT3_HUMAN
3	19454	YLFHVQEV	YLFHVQEV/2	6484.67	A02	8	sp|O60906|NSMA_HUMAN
3	19373	RQIEYYFSV	RQIEYYFSV/2	6457.67	A02	9	sp|Q659C4|LAR1B_HUMAN
3	19338	YLDNGVVFV	YLDNGVVFV/2	6446	A02	9	sp|Q16531|DDB1_HUMAN
3	19268	RLFDDVPQV	RLFDDVPQV/2	6422.67	A02	9	sp|Q86Y56|HEAT2_HUMAN
3	19187	FMVDKAIYL	FM[147]VDKAIYL/2	6395.67	A02	9	sp|Q8TC92|ENOX1_HUMAN
3	19168	NLFEWHFTV	NLFEWHFTV/2	6389.33	A02	9	sp|Q9Y385|UB2J1_HUMAN
3	18411	KLIEKNYFL	KLIEKNYFL/2	6137	A02	9	sp|Q9NVP1|DDX18_HUMAN
3	18304	YMIDNVILLI	YM[147]IDNVILLI/2	6101.33	A02	10	sp|P61421|VA0D1_HUMAN
3	18156	ALLPYFVYV	ALLPYFVYV/2	6052	A02	9	sp|Q9Y6J9|TAF6L_HUMAN
3	18139	MLNEHDFEV	MLNEHDFEV/2	6046.33	A02	9	sp|P38398|BRCA1_HUMAN
3	18131	YLNDGLWHM	YLNDGLWHM[147]/2	6043.67	A02	9	sp|Q9ULC4|MCTS1_HUMAN
3	17800	KMLEKLPEL	KM[147]LEKLPEL/2	5933.33	A02	9	sp|Q9NUQ8|ABCF3_HUMAN
3	17606	GMIPYLPEL	GM[147]IPYLPEL/2	5868.67	A02	9	sp|Q92973|TNPO1_HUMAN
2	11610	YLFPGIPEL	YLFPGIPEL/2	5805	A02	9	sp|Q8NFF5|FAD1_HUMAN
2	11536	SLFEWFHPL	SLFEWFHPL/2	5768	A02	9	sp|Q9BTY2|FUCO2_HUMAN
3	17290	FLSPLLPLL	FLSPLLPLL/2	5763.33	A02	9	sp|P30040|ERP29_HUMAN
3	17090	ALLDWVTSV	ALLDWVTSV/2	5696.67	A02	9	sp|Q9UPN3|MACF1_HUMAN
3	16958	ALNDCIYSV	ALNDCIYSV/2	5652.67	A02	9	sp|Q9Y573|IPP_HUMAN
2	11244	FLFDGSPTYVL	FLFDGSPTYVL/2	5622	A02	11	sp|P49327|FAS_HUMAN
4	22394	YLPEDFIRV	YLPEDFIRV/2	5598.5	A02	9	sp|O43187|IRAK2_HUMAN
3	16741	SLYDYNPNL	SLYDYNPNL/2	5580.33	A02	9	sp|Q99613|EIF3C_HUMAN
4	22313	GLWEEAYRV	GLWEEAYRV/2	5578.25	A02	9	sp|Q9UG01|IF172_HUMAN
4	22093	VLDDKLVFV	VLDDKLVFV/2	5523.25	A02	9	sp|Q4KMQ2|ANO6_HUMAN
3	16544	KLLDLMPRL	KLLDLM[147]PRL/2	5514.67	A02	9	sp|Q96HW7|INT4_HUMAN
4	21768	FLLDKKIGV	FLLDKKIGV/2	5442	A02	9	sp|P78371|TCPB_HUMAN
4	21737	TLIEDILGV	TLIEDILGV/2	5434.25	A02	9	sp|Q8TEL6|TP4AP_HUMAN
3	16296	KIVDFSYSV	KIVDFSYSV/2	5432	A02	9	sp|O60566|BUB1B_HUMAN
3	16283	LLMEHIQEI	LLM[147]EHIQEI/2	5427.67	A02	9	sp|Q96SN8|CK5P2_HUMAN
4	21628	VLDDKLYVV	VLDDKLYVV/2	5407	A02	9	sp|Q96PQ7|KLHL5_HUMAN
3	16182	FLINFIHTL	FLINFIHTL/2	5394	A02	9	sp|O15031|PLXB2_HUMAN
3	16007	LMISRTPEV	LMISRTPEV/2	5335.67	A02	9	sp|P01857|IGHG1_HUMAN
3	15919	YLDPSVLSGV	YLDPSVLSGV/2	5306.33	A02	10	sp|Q15041|AR6P1_HUMAN
2	10491	ALWGFFPV	ALWGFFPV/2	5245.5	A02	8	sp|Q9NPA0|EMC7_HUMAN
3	15649	YLTDRVMTV	YLTDRVM[147]TV/2	5216.33	A02	9	sp|O15379|HDAC3_HUMAN
4	20826	TLADLVHHV	TLADLVHHV/2	5206.5	A02	9	sp|Q9Y4A5|TRRAP_HUMAN
4	20790	TLYDIAHTPGV	TLYDIAHTPGV/2	5197.5	A02	11	sp|P40926|MDHM_HUMAN
4	20720	LLFDSVIHL	LLFDSVIHL/2	5180	A02	9	sp|Q9BZM1|PG12A_HUMAN
3	15208	YLDPRLAFTV	YLDPRLAFTV/2	5069.33	A02	10	sp|Q9NZC7|WWOX_HUMAN
4	20149	SLLDPVPEV	SLLDPVPEV/2	5037.25	A02	9	sp|Q92616|GCN1L_HUMAN
3	15078	YVYEYLLHV	YVYEYLLHV/2	5026	A02	9	sp|P81877|SSBP2_HUMAN
3	14956	WLVDHVYAI	WLVDHVYAI/2	4985.33	A02	9	sp|P30154|2AAB_HUMAN
4	19705	ILDEVIFKL	ILDEVIFKL/2	4926.25	A02	9	sp|Q15051|IQCB1_HUMAN
4	19612	FLMNEVIKL	FLM[147]NEVIKL/2	4903	A02	9	sp|Q9BXL7|CAR11_HUMAN
4	19595	ALITRIFGV	ALITRIFGV/2	4898.75	A02	9	sp|Q6YHU6|THADA_HUMAN
4	19464	GLLDAVTYL	GLLDAVTYL/2	4866	A02	9	sp|Q9UP65|PA24C_HUMAN
4	19461	SLIDADPYL	SLIDADPYL/2	4865.25	A02	9	sp|P20248|CCNA2_HUMAN
4	19387	GLADKVYFL	GLADKVYFL/2	4846.75	A02	9	sp|P27708|PYR1_HUMAN
3	14397	YLLDLHSYLL	YLLDLHSYLL/2	4799	A02	10	sp|O60337|MARH6_HUMAN
2	9566	SLMDHTIPEV	SLM[147]DHTIPEV/2	4783	A02	10	sp|O00560|SDCB1_HUMAN
3	14336	FLLKLTPLL	FLLKLTPLL/2	4778.67	A02	9	sp|O75448|MED24_HUMAN
4	18956	RLLEGYEIYV	RLLEGYEIYV/2	4739	A02	10	sp|Q14676|MDC1_HUMAN
2	9473	YMIAHITGL	YM[147]IAHITGL/2	4736.5	A02	9	sp|P04818|TYSY_HUMAN
3	14181	FMNPHLISV	FM[147]NPHLISV/2	4727	A02	9	sp|Q9UG01|IF172_HUMAN
4	18905	GLLDSILSV	GLLDSILSV/2	4726.25	A02	9	sp|Q86XA9|HTR5A_HUMAN
4	18889	KIIDFIYTA	KIIDFIYTA/2	4722.25	A02	9	sp|Q9P2N7|KLH13_HUMAN
4	18720	FLDHVMYTI	FLDHVM[147]YTI/2	4680	A02	9	sp|Q13422|IKZF1_HUMAN
4	18678	FLLDGFPRTV	FLLDGFPRTV/2	4669.5	A02	10	sp|P54819|KAD2_HUMAN
4	18636	KLWSETFDV	KLWSETFDV/2	4659	A02	9	sp|Q9NR81|ARHG3_HUMAN
3	13967	FMIDASVHPTL	FM[147]IDASVHPTL/2	4655.67	A02	11	sp|P86791|CCZ1_HUMAN
5	22924	KLLDISELDMV	KLLDISELDM[147]V/2	4584.8	A02	11	sp|Q9H3P2|NELFA_HUMAN
3	13592	KLYDGFQYL	KLYDGFQYL/2	4530.67	A02	9	sp|Q9UBF8|PI4KB_HUMAN
3	13574	FLWDVPSNWTL	FLWDVPSNWTL/2	4524.67	A02	11	sp|P49327|FAS_HUMAN
3	13485	FLWDEGFHQL	FLWDEGFHQL/2	4495	A02	10	sp|Q13724|MOGS_HUMAN
4	17919	KLIGQVHEV	KLIGQVHEV/2	4479.75	A02	9	sp|Q5TBA9|FRY_HUMAN
4	17914	FLLPPVFNI	FLLPPVFNI/2	4478.5	A02	9	sp|P17181|INAR1_HUMAN
4	17896	RLLDYVVNI	RLLDYVVNI/2	4474	A02	9	sp|Q63ZY3|KANK2_HUMAN
4	17867	YLAHFIEGL	YLAHFIEGL/2	4466.75	A02	9	sp|Q9C0E2|XPO4_HUMAN
4	17863	YLHDFLKYL	YLHDFLKYL/2	4465.75	A02	9	sp|Q15014|MO4L2_HUMAN
4	17862	YLLPAIVHI	YLLPAIVHI/2	4465.5	A02	9	sp|Q92841|DDX17_HUMAN
5	22265	GLTEALHFV	GLTEALHFV/2	4453	A02	9	sp|P07199|CENPB_HUMAN
4	17802	FLIAQLPKL	FLIAQLPKL/2	4450.5	A02	9	sp|Q12768|STRUM_HUMAN
4	17794	VLFDVSIMAV	VLFDVSIM[147]AV/2	4448.5	A02	10	sp|Q9BV38|WDR18_HUMAN
4	17781	FLFRDILEL	FLFRDILEL/2	4445.25	A02	9	sp|Q9NRR4|RNC_HUMAN
4	17717	FLAEDALNTV	FLAEDALNTV/2	4429.25	A02	10	sp|Q08345|DDR1_HUMAN
4	17709	VLLDYHLNYL	VLLDYHLNYL/2	4427.25	A02	10	sp|Q06787|FMR1_HUMAN
4	17708	SIIDWLNSV	SIIDWLNSV/2	4427	A02	9	sp|Q9NVW2|RNF12_HUMAN
5	22090	GQIEVVPEV	GQIEVVPEV/2	4418	A02	9	sp|Q92576|PHF3_HUMAN
4	17543	VLIEGSINSV	VLIEGSINSV/2	4385.75	A02	10	sp|P59998|ARPC4_HUMAN
3	13105	FLDEKTHEL	FLDEKTHEL/2	4368.33	A02	9	sp|Q9H0K6|PUS7L_HUMAN
5	21720	KLLNKIYEA	KLLNKIYEA/2	4344	A02	9	sp|O60287|NPA1P_HUMAN
5	21605	SLFQGVEFHYV	SLFQGVEFHYV/2	4321	A02	11	sp|Q14739|LBR_HUMAN
5	21572	SMSADVPLV	SMSADVPLV/2	4314.4	A02	9	sp|P12004|PCNA_HUMAN
4	17216	YMAELIERL	YM[147]AELIERL/2	4304	A02	9	sp|O75496|GEMI_HUMAN
5	21340	SLLDEFYKL	SLLDEFYKL/2	4268	A02	9	sp|Q14444|CAPR1_HUMAN
3	12763	SLLDCTFRL	SLLDCTFRL/2	4254.33	A02	9	sp|O60244|MED14_HUMAN
5	21218	FLGIHVFLV	FLGIHVFLV/2	4243.6	A02	9	sp|Q9Y679|AUP1_HUMAN
5	21214	KVIDEIYRV	KVIDEIYRV/2	4242.8	A02	9	sp|Q9NVF7|FBX28_HUMAN
5	21191	GLLRIIPYL	GLLRIIPYL/2	4238.2	A02	9	sp|Q5T4S7|UBR4_HUMAN
5	20881	VLIRDLNFEV	VLIRDLNFEV/2	4176.2	A02	10	sp|P28288|ABCD3_HUMAN
2	8337	VLMPWIHEL	VLM[147]PWIHEL/2	4168.5	A02	9	sp|Q9C000|NALP1_HUMAN
4	16657	ILLDRLLYL	ILLDRLLYL/2	4164.25	A02	9	sp|Q96FB5|RRNAD_HUMAN
5	20811	SLPDFGISYV	SLPDFGISYV/2	4162.2	A02	10	sp|Q86UX7|URP2_HUMAN
4	16642	FVDDYTVRV	FVDDYTVRV/2	4160.5	A02	9	sp|O00487|PSDE_HUMAN
3	12476	VLMEMSYRL	VLM[147]EM[147]SYRL/2	4158.67	A02	9	sp|Q6PCD5|RFWD3_HUMAN
4	16544	RLFDQAFGL	RLFDQAFGL/2	4136	A02	9	sp|P04792|HSPB1_HUMAN
4	16367	YLFPGIPELL	YLFPGIPELL/2	4091.75	A02	10	sp|Q8NFF5|FAD1_HUMAN
4	16306	VLADQVWTL	VLADQVWTL/2	4076.5	A02	9	sp|O15527|OGG1_HUMAN
5	20321	FLNKEITSV	FLNKEITSV/2	4064.2	A02	9	sp|Q9UI10|EI2BD_HUMAN
4	16245	FVLPELPSV	FVLPELPSV/2	4061.25	A02	9	sp|P53990|IST1_HUMAN
4	16211	ALWDKLFNL	ALWDKLFNL/2	4052.75	A02	9	sp|Q8WXH0|SYNE2_HUMAN
4	16197	SLFNGSHYL	SLFNGSHYL/2	4049.25	A02	9	sp|P54277|PMS1_HUMAN
4	16089	ILVDTVWAL	ILVDTVWAL/2	4022.25	A02	9	sp|O00629|IMA3_HUMAN
5	20087	SLIDIVTEI	SLIDIVTEI/2	4017.4	A02	9	sp|Q9UHH9|IP6K2_HUMAN
5	20076	FQHTGIYSV	FQHTGIYSV/2	4015.2	A02	9	sp|Q9Y5S1|TRPV2_HUMAN
5	20047	LLLPDYYLVTV	LLLPDYYLVTV/2	4009.4	A02	11	sp|Q7KZF4|SND1_HUMAN
5	20012	LLFDHLEPIEL	LLFDHLEPIEL/2	4002.4	A02	11	sp|Q8IV61|GRP3_HUMAN
5	19979	KVLEYVIKV	KVLEYVIKV/3	3995.8	A02	9	sp|P43355|MAGA1_HUMAN
5	19954	NMVDIIHSV	NM[147]VDIIHSV/2	3990.8	A02	9	sp|P05166|PCCB_HUMAN
5	19862	YIFEEPFTI	YIFEEPFTI/2	3972.4	A02	9	sp|P08237|PFKAM_HUMAN
5	19746	KLVELPYTV	KLVELPYTV/2	3949.2	A02	9	sp|Q9NPF4|OSGEP_HUMAN
4	15622	ALLDRIVSV	ALLDRIVSV/2	3905.5	A02	9	sp|Q92621|NU205_HUMAN
6	23409	IMLEALERV	IM[147]LEALERV/2	3901.5	A02	9	sp|A8MWD9|RUXGL_HUMAN;sp|P62308|RUXG_HUMAN
4	15565	SLLPYLPML	SLLPYLPM[147]L/2	3891.25	A02	9	sp|Q9Y4A5|TRRAP_HUMAN
5	19385	RLVDLDWRV	RLVDLDWRV/2	3877	A02	9	sp|Q9P000|COMD9_HUMAN
4	15305	KLIDLSQVMYL	KLIDLSQVM[147]YL/2	3826.25	A02	11	sp|Q6ZN28|MACC1_HUMAN
3	11344	VLWAGTPMV	VLWAGTPM[147]V/2	3781.33	A02	9	sp|O15294|OGT1_HUMAN
4	14972	FLQEKSPAV	FLQEKSPAV/2	3743	A02	9	sp|Q14157|UBP2L_HUMAN
3	11202	KLDEHIIPL	KLDEHIIPL/2	3734	A02	9	sp|Q68CL5|TPGS2_HUMAN
5	18632	ALLEDSCHYL	ALLEDSCHYL/2	3726.4	A02	10	sp|P57088|TMM33_HUMAN
6	22311	ALVFELHYV	ALVFELHYV/2	3718.5	A02	9	sp|Q6ZS81|WDFY4_HUMAN
5	18483	HLINYIIFL	HLINYIIFL/2	3696.6	A02	9	sp|Q5BJD5|TM41B_HUMAN
4	14663	FLWERPTLLV	FLWERPTLLV/2	3665.75	A02	10	sp|Q6IN84|MRM1_HUMAN
5	18318	YLLDQHILI	YLLDQHILI/2	3663.6	A02	9	sp|Q92835|SHIP1_HUMAN
6	21913	ILDEHVQRV	ILDEHVQRV/3	3652.17	A02	9	sp|O15169|AXIN1_HUMAN
5	18195	KLQEQIFHL	KLQEQIFHL/2	3639	A02	9	sp|Q9NQC1|JADE2_HUMAN
6	21798	KILEDVVGV	KILEDVVGV/2	3633	A02	9	sp|Q9ULW0|TPX2_HUMAN
4	14514	ALMELFPKL	ALM[147]ELFPKL/2	3628.5	A02	9	sp|O75691|UTP20_HUMAN
5	18126	TVFEHTFHV	TVFEHTFHV/2	3625.2	A02	9	sp|P41250|SYG_HUMAN
6	21522	GLFSNDIPHV	GLFSNDIPHV/2	3587	A02	10	sp|Q8NI36|WDR36_HUMAN
5	17649	RLTDYISKV	RLTDYISKV/2	3529.8	A02	9	sp|O75915|PRAF3_HUMAN
5	17641	RLSDAQIYV	RLSDAQIYV/2	3528.2	A02	9	sp|O14879|IFIT3_HUMAN
6	21164	ALQEKLWNV	ALQEKLWNV/2	3527.33	A02	9	sp|Q96HW7|INT4_HUMAN
6	21144	VMITKLVEV	VM[147]ITKLVEV/2	3524	A02	9	sp|Q92729|PTPRU_HUMAN
4	13912	KLLSKFYEL	KLLSKFYEL/2	3478	A02	9	sp|Q86UV5|UBP48_HUMAN
5	17380	LLWGNLPEI	LLWGNLPEI/2	3476	A02	9	sp|Q5TYM5|FA72A_HUMAN
5	17342	KLQDQIFNL	KLQDQIFNL/2	3468.4	A02	9	sp|O43665|RGS10_HUMAN
6	20806	FLIPAVELI	FLIPAVELI/2	3467.67	A02	9	sp|Q9NVP1|DDX18_HUMAN
6	20780	QLIDKVWQL	QLIDKVWQL/2	3463.33	A02	9	sp|Q92503|S14L1_HUMAN
6	20778	SLFRVITEV	SLFRVITEV/2	3463	A02	9	sp|Q93063|EXT2_HUMAN
6	20647	TLLEDGTFKV	TLLEDGTFKV/2	3441.17	A02	10	sp|Q9HBL8|NMRL1_HUMAN
5	17146	FLDSTSPLL	FLDSTSPLL/2	3429.2	A02	9	sp|Q5VYK3|ECM29_HUMAN
5	17076	SLADVHIEV	SLADVHIEV/2	3415.2	A02	9	sp|O14981|BTAF1_HUMAN
6	20403	FLYDHIQPVRA	FLYDHIQPVRA/3	3400.5	A02	11	sp|Q9Y4A5|TRRAP_HUMAN
6	20269	ALVDQLWKL	ALVDQLWKL/2	3378.17	A02	9	sp|Q6P1X5|TAF2_HUMAN
5	16886	YLTHDSPSV	YLTHDSPSV/2	3377.2	A02	9	sp|P09234|RU1C_HUMAN
6	20223	YLKDLIEEV	YLKDLIEEV/2	3370.5	A02	9	sp|P18848|ATF4_HUMAN
5	16832	HLFDAFVSV	HLFDAFVSV/2	3366.4	A02	9	sp|Q8WUY9|DEP1B_HUMAN
5	16806	FMVDRLESL	FM[147]VDRLESL/2	3361.2	A02	9	sp|Q9NZD8|SPG21_HUMAN
6	20092	FIIEKQPPQV	FIIEKQPPQV/2	3348.67	A02	10	sp|P42229|STA5A_HUMAN
5	16614	KLLEEATISV	KLLEEATISV/2	3322.8	A02	10	sp|Q7RTS9|DYM_HUMAN
7	23154	TLLKKVWKV	TLLKKVWKV/3	3307.71	A02	9	sp|Q8NA72|POC5_HUMAN
5	16462	YLFAVNIKL	YLFAVNIKL/2	3292.4	A02	9	sp|Q8N1G2|CMTR1_HUMAN
6	19591	KLWDISEVMV	KLWDISEVM[147]V/2	3265.17	A02	10	sp|Q9HBH5|RDH14_HUMAN
6	19436	MLIEVIEKL	M[147]LIEVIEKL/2	3239.33	A02	9	sp|O00203|AP3B1_HUMAN
5	16175	KLLKDLPEL	KLLKDLPEL/2	3235	A02	9	sp|Q53EL6|PDCD4_HUMAN
5	16156	RMIGQICEV	RM[147]IGQICEV/2	3231.2	A02	9	sp|P49815|TSC2_HUMAN
6	19147	AIMDIVIKV	AIM[147]DIVIKV/2	3191.17	A02	9	sp|Q9NZJ5|E2AK3_HUMAN
6	19142	YLITSVELL	YLITSVELL/2	3190.33	A02	9	sp|O60488|ACSL4_HUMAN
7	22332	FIFSEKPVFV	FIFSEKPVFV/2	3190.29	A02	10	sp|Q92673|SORL_HUMAN
5	15944	FLVTVIHTL	FLVTVIHTL/2	3188.8	A02	9	sp|O60486|PLXC1_HUMAN
7	22266	VLDNLLAFV	VLDNLLAFV/2	3180.86	A02	9	sp|O75348|VATG1_HUMAN
6	19082	KLWDIINVNI	KLWDIINVNI/2	3180.33	A02	10	sp|Q3SXM5|HSDL1_HUMAN
7	22098	VLFEKEVNEV	VLFEKEVNEV/2	3156.86	A02	10	sp|Q9BZQ8|NIBAN_HUMAN
6	18937	SLAQYLINV	SLAQYLINV/2	3156.17	A02	9	sp|Q15366|PCBP2_HUMAN
5	15712	SIIEYLPTL	SIIEYLPTL/2	3142.4	A02	9	sp|Q96QE3|ATAD5_HUMAN
5	15690	FLADIVQKL	FLADIVQKL/2	3138	A02	9	sp|Q9NZJ4|SACS_HUMAN
7	21943	TLWVDPYEV	TLWVDPYEV/2	3134.71	A02	9	sp|P62324|BTG1_HUMAN
6	18621	GLYGAIFRL	GLYGAIFRL/2	3103.5	A02	9	sp|O95977|S1PR4_HUMAN
6	18616	SLISTILEV	SLISTILEV/2	3102.67	A02	9	sp|Q9Y263|PLAP_HUMAN
4	12396	KLNEMSYEL	KLNEM[147]SYEL/2	3099	A02	9	sp|Q5VU43|MYOME_HUMAN
6	18584	LLISGLPTI	LLISGLPTI/2	3097.33	A02	9	sp|Q7Z6Z7|HUWE1_HUMAN
6	18546	ILLKDILSV	ILLKDILSV/2	3091	A02	9	sp|Q13315|ATM_HUMAN
6	18496	FLFELPSRL	FLFELPSRL/2	3082.67	A02	9	sp|Q9UID3|VPS51_HUMAN
6	18421	LLSEILHLL	LLSEILHLL/2	3070.17	A02	9	sp|O43432|IF4G3_HUMAN
6	18419	FLFNKVVNL	FLFNKVVNL/2	3069.83	A02	9	sp|P62699|YPEL5_HUMAN
7	21462	SLFKIWLV	SLFKIWLV/2	3066	A02	8	sp|Q6PID8|KLD10_HUMAN
6	18380	SMADIPLGFGV	SM[147]ADIPLGFGV/2	3063.33	A02	11	sp|Q9Y221|NIP7_HUMAN
6	18309	YLNALVHLI	YLNALVHLI/2	3051.5	A02	9	sp|Q9H6A9|PCX3_HUMAN
6	18226	MLFGHPLLV	M[147]LFGHPLLV/2	3037.67	A02	9	sp|P51784|UBP11_HUMAN
7	21207	SLVSSLYKV	SLVSSLYKV/2	3029.57	A02	9	sp|Q9BYI3|HYCCI_HUMAN
7	21165	YLGDVSERV	YLGDVSERV/2	3023.57	A02	9	sp|P53621|COPA_HUMAN
7	21114	GLAEILVLV	GLAEILVLV/2	3016.29	A02	9	sp|Q9UJP4|KLH21_HUMAN
5	15036	SLASVIFLL	SLASVIFLL/2	3007.2	A02	9	sp|Q9UBM7|DHCR7_HUMAN
4	12023	KLWDPNEFAV	KLWDPNEFAV/2	3005.75	A02	10	sp|Q14156|EFR3A_HUMAN
4	12018	RLYEITIEV	RLYEITIEV/2	3004.5	A02	9	sp|Q8TEM1|PO210_HUMAN
6	17966	GLIDHQTYL	GLIDHQTYL/2	2994.33	A02	9	sp|Q15149|PLEC_HUMAN
6	17917	TLDDLIAAV	TLDDLIAAV/2	2986.17	A02	9	sp|Q8IWZ3|ANKH1_HUMAN
5	14894	FLSPLLTLL	FLSPLLTLL/2	2978.8	A02	9	sp|Q7Z3C6|ATG9A_HUMAN
7	20819	TLFDYEVRL	TLFDYEVRL/2	2974.14	A02	9	sp|Q96T88|UHRF1_HUMAN
7	20778	ILTTLIHLV	ILTTLIHLV/2	2968.29	A02	9	sp|Q9UI26|IPO11_HUMAN
7	20671	KLDQVIIHV	KLDQVIIHV/2	2953	A02	9	sp|Q9BXD5|NPL_HUMAN
8	23612	LLPHILVYV	LLPHILVYV/2	2951.5	A02	9	sp|Q13535|ATR_HUMAN
7	20561	YLITLLEHL	YLITLLEHL/2	2937.29	A02	9	sp|O43683|BUB1_HUMAN
6	17553	FLLPILSQI	FLLPILSQI/2	2925.5	A02	9	sp|O00571|DDX3X_HUMAN
6	17439	GLYEGLTWL	GLYEGLTWL/2	2906.5	A02	9	sp|P62330|ARF6_HUMAN
4	11582	YMNHIMVSV	YM[147]NHIM[147]VSV/2	2895.5	A02	9	sp|P41212|ETV6_HUMAN
6	17340	KMADIEYRL	KMADIEYRL/2	2890	A02	9	sp|P40937|RFC5_HUMAN
6	17333	VLIDDLTTL	VLIDDLTTL/2	2888.83	A02	9	sp|Q9Y2Z2|MTO1_HUMAN
3	8651	KMMDVTVTI	KM[147]M[147]DVTVTI/2	2883.67	A02	9	sp|Q15155|NOMO1_HUMAN
6	17213	FLSHLLLFL	FLSHLLLFL/2	2868.83	A02	9	sp|Q9HCE0|EPG5_HUMAN
7	20001	FLFDIPKILDL	FLFDIPKILDL/2	2857.29	A02	11	sp|Q9H1I8|ASCC2_HUMAN
6	17132	YLIPDIDLKL	YLIPDIDLKL/2	2855.33	A02	10	sp|Q92922|SMRC1_HUMAN
7	19974	ILAELLLRV	ILAELLLRV/2	2853.43	A02	9	sp|P50613|CDK7_HUMAN
5	14167	KLYAGAILEV	KLYAGAILEV/2	2833.4	A02	10	sp|O60613|SEP15_HUMAN
5	14167	RLDDSLLYL	RLDDSLLYL/2	2833.4	A02	9	sp|P49406|RM19_HUMAN
7	19829	SLFSHLLEI	SLFSHLLEI/2	2832.71	A02	9	sp|Q6ZS81|WDFY4_HUMAN
6	16976	AMLPSITNV	AM[147]LPSITNV/2	2829.33	A02	9	sp|Q9Y4A5|TRRAP_HUMAN
5	14146	VLLSHLSYL	VLLSHLSYL/2	2829.2	A02	9	sp|Q01543|FLI1_HUMAN
6	16899	KLIQNVFEI	KLIQNVFEI/2	2816.5	A02	9	sp|O00471|EXOC5_HUMAN
6	16870	LLLPLNLEV	LLLPLNLEV/2	2811.67	A02	9	sp|Q96RL7|VP13A_HUMAN
7	19655	KLQEQIHRV	KLQEQIHRV/3	2807.86	A02	9	sp|O60293|ZC3H1_HUMAN
5	13983	ALLAYTLGV	ALLAYTLGV/2	2796.6	A02	9	sp|P68104|EF1A1_HUMAN
5	13973	KLYEAVPQL	KLYEAVPQL/2	2794.6	A02	9	sp|O00311|CDC7_HUMAN
6	16765	YLDLFGDPSV	YLDLFGDPSV/2	2794.17	A02	10	sp|P14324|FPPS_HUMAN
3	8372	FIWENIHTL	FIWENIHTL/2	2790.67	A02	9	sp|Q03001|DYST_HUMAN
7	19529	SLIEVVIGL	SLIEVVIGL/2	2789.86	A02	9	sp|Q9UGH3|S23A2_HUMAN
4	11151	KIADFGWSV	KIADFGWSV/2	2787.75	A02	9	sp|Q9UQB9|AURKC_HUMAN
8	22201	FLFEPVVKA	FLFEPVVKA/2	2775.12	A02	9	sp|Q6IN85|P4R3A_HUMAN
7	19412	KLFDTQQFL	KLFDTQQFL/2	2773.14	A02	9	sp|Q15306|IRF4_HUMAN
7	19405	LLLPILVTV	LLLPILVTV/2	2772.14	A02	9	sp|O94822|LTN1_HUMAN
7	19392	SLIDFLRVV	SLIDFLRVV/2	2770.29	A02	9	sp|P43378|PTN9_HUMAN
7	19346	ALVESLITV	ALVESLITV/2	2763.71	A02	9	sp|Q8N655|CJ012_HUMAN
8	22078	SLLQTLYKV	SLLQTLYKV/2	2759.75	A02	9	sp|P46060|RAGP1_HUMAN
4	10986	KLLAVIHEL	KLLAVIHEL/2	2746.5	A02	9	sp|Q9Y620|RA54B_HUMAN
5	13697	KLLPQLTYL	KLLPQLTYL/2	2739.4	A02	9	sp|P39687|AN32A_HUMAN
7	19079	VLYSVMTLV	VLYSVM[147]TLV/2	2725.57	A02	9	sp|Q9UNL2|SSRG_HUMAN
7	19064	FLNEDLNQL	FLNEDLNQL/2	2723.43	A02	9	sp|Q8WTT2|NOC3L_HUMAN
8	21691	HLLEEPIYL	HLLEEPIYL/2	2711.38	A02	9	sp|Q9BUB4|ADAT1_HUMAN
8	21593	SLVEIILHV	SLVEIILHV/2	2699.12	A02	9	sp|Q9UNM6|PSD13_HUMAN
4	10770	SLAELVHAV	SLAELVHAV/2	2692.5	A02	9	sp|Q9Y6P5|SESN1_HUMAN
7	18769	GLWSGPLPRV	GLWSGPLPRV/2	2681.29	A02	10	sp|Q99575|POP1_HUMAN
5	13402	YLAPFLRNV	YLAPFLRNV/2	2680.4	A02	9	sp|A5YKK6|CNOT1_HUMAN
7	18643	KVLEILHRV	KVLEILHRV/2	2663.29	A02	9	sp|Q5GLZ8|HERC4_HUMAN
6	15901	VLAPLVIYL	VLAPLVIYL/2	2650.17	A02	9	sp|Q9H461|FZD8_HUMAN
6	15802	VLLSTIHEL	VLLSTIHEL/2	2633.67	A02	9	sp|Q6I9Y2|THOC7_HUMAN
7	18417	SMVDVVMLL	SM[147]VDVVMLL/2	2631	A02	9	sp|P46379|BAG6_HUMAN
7	18372	GILPMVPEV	GILPM[147]VPEV/2	2624.57	A02	9	sp|O95793|STAU1_HUMAN
4	10496	RIIDCAFTV	RIIDCAFTV/2	2624	A02	9	sp|P50579|MAP2_HUMAN
6	15684	KLMDLDVEQL	KLM[147]DLDVEQL/2	2614	A02	10	sp|P12004|PCNA_HUMAN
7	18160	ALLGGLVNV	ALLGGLVNV/2	2594.29	A02	9	sp|Q8N4S7|PAQR4_HUMAN
8	20723	GMYIFLHTV	GM[147]YIFLHTV/2	2590.38	A02	9	sp|Q8N138|ORML3_HUMAN
7	18131	FLFEPVVKAFL	FLFEPVVKAFL/2	2590.14	A02	11	sp|Q6IN85|P4R3A_HUMAN
8	20623	KLYDIDVAKV	KLYDIDVAKV/2	2577.88	A02	10	sp|P62750|RL23A_HUMAN
8	20536	QLIEKNWLL	QLIEKNWLL/2	2567	A02	9	sp|Q9NS87|KIF15_HUMAN
4	10253	YLGPHIASV	YLGPHIASV/2	2563.25	A02	9	sp|Q96GC9|VMP1_HUMAN
6	15282	RLFDDSTVTTV	RLFDDSTVTTV/2	2547	A02	11	sp|O94966|UBP19_HUMAN
5	12731	FLLPAGWIL	FLLPAGWIL/2	2546.2	A02	9	sp|P10176|COX8A_HUMAN
2	5091	YMMPVNSEV	YM[147]M[147]PVNSEV/2	2545.5	A02	9	sp|Q9BZD4|NUF2_HUMAN
7	17721	ALWDIETGQQTV	ALWDIETGQQTV/2	2531.57	A02	12	sp|P62879|GBB2_HUMAN
7	17696	YLISQVEGHQV	YLISQVEGHQV/2	2528	A02	11	sp|Q9Y3C4|TPRKB_HUMAN
6	15165	RLFSSIVTV	RLFSSIVTV/2	2527.5	A02	9	sp|Q9NX74|DUS2L_HUMAN
7	17651	KLFDAPLSI	KLFDAPLSI/2	2521.57	A02	9	sp|A8K0Z3|WASH1_HUMAN
8	20129	VLVSELIPWAV	VLVSELIPWAV/2	2516.12	A02	11	sp|Q9Y3A0|COQ4_HUMAN
7	17404	KLHDSVVMV	KLHDSVVM[147]V/2	2486.29	A02	9	sp|Q9GZN8|CT027_HUMAN
7	17354	KLNPQQFEV	KLNPQQFEV/2	2479.14	A02	9	sp|P46977|STT3A_HUMAN
6	14865	FIADLVVGL	FIADLVVGL/2	2477.5	A02	9	sp|P13929|ENOB_HUMAN
4	9895	YLADIFTKL	YLADIFTKL/2	2473.75	A02	9	sp|Q49AG3|ZBED5_HUMAN
7	17314	GLYPGLIWL	GLYPGLIWL/2	2473.43	A02	9	sp|O14896|IRF6_HUMAN
7	17296	ALATLIHQV	ALATLIHQV/2	2470.86	A02	9	sp|Q9UBW8|CSN7A_HUMAN
8	19737	VLYPASPHGV	VLYPASPHGV/2	2467.12	A02	10	sp|Q99704|DOK1_HUMAN
5	12252	KLLSFTHKL	KLLSFTHKL/3	2450.4	A02	9	sp|A3KMH1|VWA8_HUMAN
5	12231	FLWERPTLL	FLWERPTLL/2	2446.2	A02	9	sp|Q6IN84|MRM1_HUMAN
6	14669	GMAERIPEL	GM[147]AERIPEL/2	2444.83	A02	9	sp|O95573|ACSL3_HUMAN
3	7331	YLSPKLWAL	YLSPKLWAL/2	2443.67	A02	9	sp|Q9BRS8|LARP6_HUMAN
9	21988	TMVDRIEEV	TM[147]VDRIEEV/2	2443.11	A02	9	sp|P29375|KDM5A_HUMAN
8	19489	HLGDFLVFL	HLGDFLVFL/2	2436.12	A02	9	sp|Q15751|HERC1_HUMAN
8	19481	QLAQFVHEV	QLAQFVHEV/2	2435.12	A02	9	sp|A8MPP1|D11L8_HUMAN
8	19297	ILWSEAIFL	ILWSEAIFL/2	2412.12	A02	9	sp|O94906|PRP6_HUMAN
7	16795	VLAPLIALV	VLAPLIALV/2	2399.29	A02	9	sp|Q9Y320|TMX2_HUMAN
9	21591	KLADDVDLEQV	KLADDVDLEQV/2	2399	A02	11	sp|P55072|TERA_HUMAN
7	16748	YLSNVDVYL	YLSNVDVYL/2	2392.57	A02	9	sp|O95544|NADK_HUMAN
9	21287	QLLKFIPGL	QLLKFIPGL/2	2365.22	A02	9	sp|O60759|CYTIP_HUMAN
6	14181	FLLPVINEM	FLLPVINEM[147]/2	2363.5	A02	9	sp|Q9Y605|MOFA1_HUMAN
6	14096	ALLDQLHTL	ALLDQLHTL/2	2349.33	A02	9	sp|Q9Y6Q9|NCOA3_HUMAN
8	18767	KLFGMIITI	KLFGM[147]IITI/2	2345.88	A02	9	sp|P61619|S61A1_HUMAN
5	11688	HLYDYTVKL	HLYDYTVKL/2	2337.6	A02	9	sp|O00291|HIP1_HUMAN
8	18666	ILWEHLEIL	ILWEHLEIL/2	2333.25	A02	9	sp|P14921|ETS1_HUMAN
10	23290	YLINEIDRI	YLINEIDRI/2	2329	A02	9	sp|Q03001|DYST_HUMAN
4	9300	YLIPFTGIVGL	YLIPFTGIVGL/2	2325	A02	11	sp|Q9H6Y7|RN167_HUMAN
6	13944	ALMPVLNQV	ALM[147]PVLNQV/2	2324	A02	9	sp|Q5RKV6|EXOS6_HUMAN
7	16171	SLLDRFLATV	SLLDRFLATV/2	2310.14	A02	10	sp|Q14094|CCNI_HUMAN
8	18455	ALANGIEEV	ALANGIEEV/2	2306.88	A02	9	sp|O95236|APOL3_HUMAN
5	11400	YLTDLQVSL	YLTDLQVSL/2	2280	A02	9	sp|Q9Y4A8|NF2L3_HUMAN
5	11397	LLLSLLPAL	LLLSLLPAL/2	2279.4	A02	9	sp|Q16553|LY6E_HUMAN
7	15946	VLDEGSASV	VLDEGSASV/2	2278	A02	9	sp|Q05923|DUS2_HUMAN
9	20467	GLAELYVMV	GLAELYVM[147]V/2	2274.11	A02	9	sp|Q8N511|TM199_HUMAN
8	18160	LLANIVPIAMLV	LLANIVPIAM[147]LV/2	2270	A02	12	sp|P03901|NU4LM_HUMAN
8	18160	FLKDLVASV	FLKDLVASV/2	2270	A02	9	sp|Q14919|NC2A_HUMAN
5	11349	KIMDATNILV	KIM[147]DATNILV/2	2269.8	A02	10	sp|P40763|STAT3_HUMAN
8	18116	ALLPIFFGA	ALLPIFFGA/2	2264.5	A02	9	sp|Q8TCT9|HM13_HUMAN
9	20362	VLYTGVVRV	VLYTGVVRV/2	2262.44	A02	9	sp|Q9H1A4|APC1_HUMAN
8	18063	FLLDKPQDLSI	FLLDKPQDLSI/2	2257.88	A02	11	sp|Q6ZN28|MACC1_HUMAN
10	22487	FQIGPVAGV	FQIGPVAGV/2	2248.7	A02	9	sp|Q14246|EMR1_HUMAN
9	20219	KLGDIMGV	KLGDIM[147]GV/2	2246.56	A02	8	sp|Q92620|PRP16_HUMAN
8	17958	GLVPFLVSV	GLVPFLVSV/2	2244.75	A02	9	sp|P52292|IMA1_HUMAN
8	17896	KLWEMDNMLI	KLWEM[147]DNM[147]LI/2	2237	A02	10	sp|Q9Y605|MOFA1_HUMAN
7	15655	KLQEQLPEL	KLQEQLPEL/2	2236.43	A02	9	sp|Q14746|COG2_HUMAN
7	15642	ALADKELLPSV	ALADKELLPSV/2	2234.57	A02	11	sp|Q9BRQ8|AIFM2_HUMAN
6	13376	RMLPHAPGV	RMLPHAPGV/2	2229.33	A02	9	sp|Q13547|HDAC1_HUMAN
9	19896	FLNGLEILL	FLNGLEILL/2	2210.67	A02	9	sp|Q9NU22|MDN1_HUMAN
9	19815	KLIEILEQL	KLIEILEQL/2	2201.67	A02	9	sp|A0PJE2|DHR12_HUMAN
5	11008	ALMDLLLRL	ALM[147]DLLLRL/2	2201.6	A02	9	sp|O75170|PP6R2_HUMAN
9	19713	GLIDFAIQL	GLIDFAIQL/2	2190.33	A02	9	sp|Q86YW9|MD12L_HUMAN
7	15181	ALLDSAHLL	ALLDSAHLL/2	2168.71	A02	9	sp|O14617|AP3D1_HUMAN
8	17329	YLYVRAHGV	YLYVRAHGV/2	2166.12	A02	9	sp|Q9Y3A4|RRP7A_HUMAN
8	17218	LLAPFCPHL	LLAPFCPHL/2	2152.25	A02	9	sp|Q9P2J5|SYLC_HUMAN
9	19370	FLPPLPTSV	FLPPLPTSV/2	2152.22	A02	9	sp|Q13057|COASY_HUMAN
10	21498	FLFNLPLNI	FLFNLPLNI/2	2149.8	A02	9	sp|Q96KP1|EXOC2_HUMAN
9	19325	ILLDIHIFM	ILLDIHIFM[147]/2	2147.22	A02	9	sp|Q14008|CKAP5_HUMAN
8	17091	HLYDIHVTV	HLYDIHVTV/2	2136.38	A02	9	sp|A8MXV4|NUD19_HUMAN
6	12785	YMIGSEVGNYL	YM[147]IGSEVGNYL/2	2130.83	A02	11	sp|Q12824|SNF5_HUMAN
9	19149	ILLDDNMQIRL	ILLDDNM[147]QIRL/2	2127.67	A02	11	sp|P15735|PHKG2_HUMAN
10	21230	RLPEAIEEV	RLPEAIEEV/2	2123	A02	9	sp|Q9UBQ7|GRHPR_HUMAN
7	14851	RLVEIQYEL	RLVEIQYEL/2	2121.57	A02	9	sp|Q14161|GIT2_HUMAN
8	16942	KLQELNYNL	KLQELNYNL/2	2117.75	A02	9	sp|P42224|STAT1_HUMAN
9	19037	VLLDAPIQL	VLLDAPIQL/2	2115.22	A02	9	sp|Q9NUQ8|ABCF3_HUMAN
9	18996	LLAEALNQV	LLAEALNQV/2	2110.67	A02	9	sp|Q05655|KPCD_HUMAN
10	20994	ALMDEVVKA	ALM[147]DEVVKA/2	2099.4	A02	9	sp|P00558|PGK1_HUMAN
5	10479	WLAEKLPTL	WLAEKLPTL/2	2095.8	A02	9	sp|Q14008|CKAP5_HUMAN
8	16760	KIYEGQVEV	KIYEGQVEV/2	2095	A02	9	sp|P46777|RL5_HUMAN
10	20828	NLLKLIAEV	NLLKLIAEV/2	2082.8	A02	9	sp|Q9HBM1|SPC25_HUMAN
3	6240	ALMEVTVYL	ALM[147]EVTVYL/2	2080	A02	9	sp|P59045|NAL11_HUMAN
6	12377	FLSELTQQL	FLSELTQQL/2	2062.83	A02	9	sp|P14174|MIF_HUMAN
10	20626	GLVNYQISV	GLVNYQISV/2	2062.6	A02	9	sp|P08236|BGLR_HUMAN
10	20591	NLNSIVPSV	NLNSIVPSV/2	2059.1	A02	9	sp|P48200|IREB2_HUMAN
6	12188	KMWEEAISL	KMWEEAISL/2	2031.33	A02	9	sp|Q92608|DOCK2_HUMAN
9	18276	HLLDIYIQL	HLLDIYIQL/2	2030.67	A02	9	sp|Q9NU22|MDN1_HUMAN
2	4059	VLMDRLPSL	VLM[147]DRLPSL/2	2029.5	A02	9	sp|O60287|NPA1P_HUMAN
4	8116	FLLDGKVLSL	FLLDGKVLSL/2	2029	A02	10	sp|Q8N1F8|S11IP_HUMAN
10	20261	SLQEEIAFL	SLQEEIAFL/2	2026.1	A02	9	sp|P08670|VIME_HUMAN
7	14145	YLVELSSLL	YLVELSSLL/2	2020.71	A02	9	sp|Q96JB5|CK5P3_HUMAN
10	20186	ALTDVILCV	ALTDVILCV/2	2018.6	A02	9	sp|Q8WZ60|KLHL6_HUMAN
10	20167	ILLSVPLLV	ILLSVPLLV/2	2016.7	A02	9	sp|P53621|COPA_HUMAN
11	22122	ALNELLQHV	ALNELLQHV/2	2011.09	A02	9	sp|Q9Y490|TLN1_HUMAN
5	10050	FLQEYGLSV	FLQEYGLSV/2	2010	A02	9	sp|Q13564|ULA1_HUMAN
9	18076	RQIEVLTTV	RQIEVLTTV/2	2008.44	A02	9	sp|P28290|SSFA2_HUMAN
9	18059	GLYSGVTTV	GLYSGVTTV/2	2006.56	A02	9	sp|P23921|RIR1_HUMAN
10	20053	KLIPFLEKL	KLIPFLEKL/3	2005.3	A02	9	sp|Q05D32|CTSL2_HUMAN
9	18046	LLDTVTMQV	LLDTVTM[147]QV/2	2005.11	A02	9	sp|Q9Y678|COPG1_HUMAN
6	11937	KLIPQLPTL	KLIPQLPTL/2	1989.5	A02	9	sp|Q9NQL2|RRAGD_HUMAN
7	13910	ALMDQVHHM	ALM[147]DQVHHM[147]/3	1987.14	A02	9	sp|Q96BU1|S1PBP_HUMAN
8	15853	FLLPKVQSI	FLLPKVQSI/2	1981.62	A02	9	sp|A2VDJ0|T131L_HUMAN
11	21797	ALLGILQHV	ALLGILQHV/2	1981.55	A02	9	sp|Q8IVD9|NUDC3_HUMAN
9	17821	FLHPEPFSI	FLHPEPFSI/2	1980.11	A02	9	sp|Q9ULC5|ACSL5_HUMAN
11	21679	SLLKFLAKV	SLLKFLAKV/2	1970.82	A02	9	sp|P43363|MAGAA_HUMAN
11	21670	IMFQKPVEV	IM[147]FQKPVEV/2	1970	A02	9	sp|Q9Y305|ACOT9_HUMAN
8	15752	KIWDPVHRV	KIWDPVHRV/3	1969	A02	9	sp|P29144|TPP2_HUMAN
11	21582	SLFKLIVKV	SLFKLIVKV/2	1962	A02	9	sp|Q5UIP0|RIF1_HUMAN
9	17652	SLITRLLEV	SLITRLLEV/2	1961.33	A02	9	sp|P62140|PP1B_HUMAN
9	17634	KMVDGVGVCTV	KM[147]VDGVGVCTV/2	1959.33	A02	11	sp|Q5T4S7|UBR4_HUMAN
8	15669	KLIDKLDSL	KLIDKLDSL/2	1958.62	A02	9	sp|Q8N1I0|DOCK4_HUMAN
8	15650	GLLPDVPSL	GLLPDVPSL/2	1956.25	A02	9	sp|Q96N66|MBOA7_HUMAN
9	17561	RLAHYIDRV	RLAHYIDRV/3	1951.22	A02	9	sp|Q03252|LMNB2_HUMAN
7	13641	FLDPDIGGVAV	FLDPDIGGVAV/2	1948.71	A02	11	sp|Q6N021|TET2_HUMAN
8	15589	KLIDGQVIQL	KLIDGQVIQL/2	1948.62	A02	10	sp|P52747|ZN143_HUMAN
9	17500	ALADGVQKV	ALADGVQKV/2	1944.44	A02	9	sp|O14791|APOL1_HUMAN
7	13569	FLLDPYKYMTL	FLLDPYKYMTL/2	1938.43	A02	11	sp|Q9UIG0|BAZ1B_HUMAN
11	21286	TLLHFLVEI	TLLHFLVEI/2	1935.09	A02	9	sp|Q9NSV4|DIAP3_HUMAN
12	23200	VMFKEPVEV	VM[147]FKEPVEV/2	1933.33	A02	9	sp|Q9BX70|BTBD2_HUMAN
10	19153	FLDNLHINL	FLDNLHINL/2	1915.3	A02	9	sp|Q9NYU1|UGGG2_HUMAN
10	19152	ALVDHLNVGV	ALVDHLNVGV/2	1915.2	A02	10	sp|P78537|BL1S1_HUMAN
10	19142	ILDDSHLLV	ILDDSHLLV/2	1914.2	A02	9	sp|O60306|AQR_HUMAN
10	19124	KILQELPSV	KILQELPSV/2	1912.4	A02	9	sp|Q96ST2|IWS1_HUMAN
11	21014	KLIEELETL	KLIEELETL/2	1910.36	A02	9	sp|Q03060|CREM_HUMAN
9	17182	ALIGMSPQV	ALIGM[147]SPQV/2	1909.11	A02	9	sp|Q9NW15|ANO10_HUMAN
10	19083	VLAHTILGV	VLAHTILGV/2	1908.3	A02	9	sp|Q9NUQ7|UFSP2_HUMAN
11	20901	KLDQDLNEV	KLDQDLNEV/2	1900.09	A02	9	sp|Q9UQE7|SMC3_HUMAN
5	9500	FLLQDTVEL	FLLQDTVEL/2	1900	A02	9	sp|P78344|IF4G2_HUMAN
11	20847	LLDRFLATV	LLDRFLATV/2	1895.18	A02	9	sp|Q14094|CCNI_HUMAN
6	11350	FMLPDPQNISL	FM[147]LPDPQNISL/2	1891.67	A02	11	sp|Q8WW01|SEN15_HUMAN
10	18882	GLIDRQVTV	GLIDRQVTV/2	1888.2	A02	9	sp|Q9UPN3|MACF1_HUMAN
8	15101	SLLEPFVYL	SLLEPFVYL/2	1887.62	A02	9	sp|Q9NYR9|KBRS2_HUMAN
11	20747	SLVEQLTMV	SLVEQLTM[147]V/2	1886.09	A02	9	sp|O75448|MED24_HUMAN
10	18851	LLAEVIENL	LLAEVIENL/2	1885.1	A02	9	sp|Q96C86|DCPS_HUMAN
6	11307	FLSPFNMIL	FLSPFNM[147]IL/2	1884.5	A02	9	sp|O75915|PRAF3_HUMAN
8	15052	VLWPLPAYL	VLWPLPAYL/2	1881.5	A02	9	sp|Q9P2X0|DPM3_HUMAN
8	15022	ALLSAAFLL	ALLSAAFLL/2	1877.75	A02	9	sp|Q9Y320|TMX2_HUMAN
8	15007	ALIEKLVEL	ALIEKLVEL/2	1875.88	A02	9	sp|Q14181|DPOA2_HUMAN
9	16866	TLIAAILYL	TLIAAILYL/2	1874	A02	9	sp|Q04941|PLP2_HUMAN
11	20578	VMDSKIVQV	VM[147]DSKIVQV/2	1870.73	A02	9	sp|O60684|IMA7_HUMAN
10	18691	GLIEKNIEL	GLIEKNIEL/2	1869.1	A02	9	sp|P26358|DNMT1_HUMAN
11	20522	KQISQAYEV	KQISQAYEV/2	1865.64	A02	9	sp|P31689|DNJA1_HUMAN
12	22360	GLMDTVKKV	GLMDTVKKV/2	1863.33	A02	9	sp|Q9Y692|GMEB1_HUMAN
10	18602	KLWEMDNMLIQI	KLWEM[147]DNM[147]LIQI/2	1860.2	A02	12	sp|Q9Y605|MOFA1_HUMAN
9	16616	FLDPRPLTV	FLDPRPLTV/2	1846.22	A02	9	sp|Q16678|CP1B1_HUMAN
11	20268	YLEPYLKEV	YLEPYLKEV/2	1842.55	A02	9	sp|P14927|QCR7_HUMAN
11	20189	KMGLIFEV	KMGLIFEV/2	1835.36	A02	8	sp|Q15363|TMED2_HUMAN
13	23661	LLNEILEQV	LLNEILEQV/2	1820.08	A02	9	sp|Q9BPX3|CND3_HUMAN
10	18115	TLAELLVLL	TLAELLVLL/2	1811.5	A02	9	sp|Q15363|TMED2_HUMAN
7	12668	SLASLLVSV	SLASLLVSV/2	1809.71	A02	9	sp|Q15024|EXOS7_HUMAN
9	16263	RLIEESVTV	RLIEESVTV/2	1807	A02	9	sp|Q12769|NU160_HUMAN
4	7208	RLAQHITYV	RLAQHITYV/2	1802	A02	9	sp|P33993|MCM7_HUMAN
11	19803	YQYPVIIHL	YQYPVIIHL/2	1800.27	A02	9	sp|Q9BW60|ELOV1_HUMAN
10	17974	LLLPISPFM	LLLPISPFM[147]/2	1797.4	A02	9	sp|P03891|NU2M_HUMAN
9	16133	KLYTGLREV	KLYTGLREV/3	1792.56	A02	9	sp|Q13618|CUL3_HUMAN
9	16086	KLLGELHTL	KLLGELHTL/2	1787.33	A02	9	sp|Q15154|PCM1_HUMAN
8	14245	IIDQHTFEV	IIDQHTFEV/2	1780.62	A02	9	sp|Q16531|DDB1_HUMAN
12	21366	GLIDENPGL	GLIDENPGL/2	1780.5	A02	9	sp|P78527|PRKDC_HUMAN
5	8894	FLFSGHTVTL	FLFSGHTVTL/2	1778.8	A02	10	sp|Q8NHU3|SMS2_HUMAN
12	21297	ILFSEDSTKLFV	ILFSEDSTKLFV/2	1774.75	A02	12	sp|Q969X6|CIR1A_HUMAN
11	19507	VLSDIIQNL	VLSDIIQNL/2	1773.36	A02	9	sp|P55160|NCKPL_HUMAN
11	19449	ILYGKIIHL	ILYGKIIHL/2	1768.09	A02	9	sp|P0CG13|CTF8_HUMAN
12	21188	VLTSEVHSV	VLTSEVHSV/2	1765.67	A02	9	sp|Q9NVM9|ASUN_HUMAN
11	19347	RLLETVIDV	RLLETVIDV/2	1758.82	A02	9	sp|P57678|GEMI4_HUMAN
5	8788	FAMPYFIQV	FAM[147]PYFIQV/2	1757.6	A02	9	sp|Q00610|CLH1_HUMAN
11	19278	TLSSLVFQL	TLSSLVFQL/2	1752.55	A02	9	sp|P42345|MTOR_HUMAN
11	19272	YLSVKIWDL	YLSVKIWDL/2	1752	A02	9	sp|P63151|2ABA_HUMAN
12	20999	VLIDYQRNV	VLIDYQRNV/2	1749.92	A02	9	sp|O14980|XPO1_HUMAN
11	19167	KLFDLDEKLML	KLFDLDEKLM[147]L/3	1742.45	A02	11	sp|Q96ER3|SAAL1_HUMAN
7	12162	KIWDVSVNSV	KIWDVSVNSV/2	1737.43	A02	10	sp|O75083|WDR1_HUMAN
8	13889	LLWPGAALLV	LLWPGAALLV/2	1736.12	A02	10	sp|Q9GZY6|NTAL_HUMAN
11	19054	SLLQALNEV	SLLQALNEV/2	1732.18	A02	9	sp|Q14204|DYHC1_HUMAN
13	22489	VLIGEFLEKV	VLIGEFLEKV/2	1729.92	A02	10	sp|O43148|MCES_HUMAN
9	15552	ALASVAYQV	ALASVAYQV/2	1728	A02	9	sp|Q9P2A4|ABI3_HUMAN
13	22377	NLLTHIENV	NLLTHIENV/2	1721.31	A02	9	sp|A8MW92|P20L1_HUMAN
4	6885	SLWPMTFGL	SLWPM[147]TFGL/2	1721.25	A02	9	sp|O75251|NDUS7_HUMAN
13	22237	TLLRLLYEA	TLLRLLYEA/2	1710.54	A02	9	sp|Q7L2H7|EIF3M_HUMAN
12	20488	ILDQKINEV	ILDQKINEV/2	1707.33	A02	9	sp|P11926|DCOR_HUMAN
8	13616	SLAPLFFKL	SLAPLFFKL/2	1702	A02	9	sp|O14617|AP3D1_HUMAN
7	11869	SLLPAIVEL	SLLPAIVEL/2	1695.57	A02	9	sp|P30154|2AAB_HUMAN
11	18560	GLADNTVIAKV	GLADNTVIAKV/2	1687.27	A02	11	sp|P26639|SYTC_HUMAN
7	11802	SLSDLLVSL	SLSDLLVSL/2	1686	A02	9	sp|Q9H1Y3|OPN3_HUMAN
6	10095	KLLQFYPSL	KLLQFYPSL/2	1682.5	A02	9	sp|Q9GZY6|NTAL_HUMAN
11	18461	TLLHFLAEL	TLLHFLAEL/2	1678.27	A02	9	sp|O60610|DIAP1_HUMAN
9	15085	LLIERILLL	LLIERILLL/2	1676.11	A02	9	sp|Q9UNS1|TIM_HUMAN
11	18385	RLQEEINEV	RLQEEINEV/2	1671.36	A02	9	sp|Q70UQ0|IKIP_HUMAN
11	18353	FLSTLHEVYL	FLSTLHEVYL/2	1668.45	A02	10	sp|Q9NPI6|DCP1A_HUMAN
10	16672	GLFDTAISL	GLFDTAISL/2	1667.2	A02	9	sp|Q12769|NU160_HUMAN
11	18267	TLLLHTWLL	TLLLHTWLL/2	1660.64	A02	9	sp|Q92608|DOCK2_HUMAN
10	16596	SLLGGDVVSV	SLLGGDVVSV/2	1659.6	A02	10	sp|Q99576|T22D3_HUMAN
12	19872	KLLDPEDISV	KLLDPEDISV/2	1656	A02	10	sp|Q01082|SPTB2_HUMAN
6	9893	VLMDRLPSLL	VLM[147]DRLPSLL/2	1648.83	A02	10	sp|O60287|NPA1P_HUMAN
12	19776	KIIGIMEEV	KIIGIM[147]EEV/2	1648	A02	9	sp|P52701|MSH6_HUMAN
13	21319	GLIDVKPLGV	GLIDVKPLGV/2	1639.92	A02	10	sp|Q8WVY7|UBCP1_HUMAN
8	13110	KVIEINPYL	KVIEINPYL/2	1638.75	A02	9	sp|P28074|PSB5_HUMAN
4	6532	FLAGAVTSV	FLAGAVTSV/2	1633	A02	9	sp|A8MPS7|YDJC_HUMAN
11	17930	TLSDIVVTL	TLSDIVVTL/2	1630	A02	9	sp|Q7Z7C8|TAF8_HUMAN
12	19433	QLLEKVPTL	QLLEKVPTL/2	1619.42	A02	9	sp|Q96T49|PP16B_HUMAN
12	19405	GLVASLISV	GLVASLISV/2	1617.08	A02	9	sp|O95347|SMC2_HUMAN
13	21011	FLFGYPKRL	FLFGYPKRL/3	1616.23	A02	9	sp|Q9HAY2|MAGF1_HUMAN
14	22516	YLPHAPPFA	YLPHAPPFA/2	1608.29	A02	9	sp|P17275|JUNB_HUMAN
7	11253	ALAGGITMV	ALAGGITM[147]V/2	1607.57	A02	9	sp|P27708|PYR1_HUMAN
14	22469	SLIEKLWQT	SLIEKLWQT/2	1604.93	A02	9	sp|P48380|RFX3_HUMAN
13	20761	RILDILEYI	RILDILEYI/2	1597	A02	9	sp|Q99986|VRK1_HUMAN
13	20754	TLYEAVREV	TLYEAVREV/2	1596.46	A02	9	sp|P62906|RL10A_HUMAN
7	11165	YLADTVQKL	YLADTVQKL/2	1595	A02	9	sp|Q9NX45|SOLH2_HUMAN
12	19137	TLYDSRLFV	TLYDSRLFV/2	1594.75	A02	9	sp|Q96Q05|TPPC9_HUMAN
6	9563	FLLQHVQEL	FLLQHVQEL/2	1593.83	A02	9	sp|Q9HC29|NOD2_HUMAN
13	20629	LLATEVVTV	LLATEVVTV/2	1586.85	A02	9	sp|Q7Z6Z7|HUWE1_HUMAN
12	19031	LLSKVLIYL	LLSKVLIYL/2	1585.92	A02	9	sp|O14981|BTAF1_HUMAN
10	15746	KLFDRPQEL	KLFDRPQEL/2	1574.6	A02	9	sp|Q5VZ89|DEN4C_HUMAN
9	14170	VLAWGLLNV	VLAWGLLNV/2	1574.44	A02	9	sp|Q96SK2|TM209_HUMAN
11	17312	VLIPKLPQL	VLIPKLPQL/2	1573.82	A02	9	sp|Q8N138|ORML3_HUMAN
14	21945	TLINLLLKV	TLINLLLKV/2	1567.5	A02	9	sp|Q9H3H5|GPT_HUMAN
11	17223	SLFLGILSV	SLFLGILSV/2	1565.73	A02	9	sp|P11836|CD20_HUMAN
13	20335	KLFTNDCIFL	KLFTNDCIFL/2	1564.23	A02	10	sp|Q8IV50|LYSM2_HUMAN
9	14054	FLLEPGNLEVLL	FLLEPGNLEVLL/2	1561.56	A02	12	sp|Q6ZNJ1|NBEL2_HUMAN
13	20254	SILHDVVEV	SILHDVVEV/2	1558	A02	9	sp|O75391|SPAG7_HUMAN
10	15557	FLLPHPGLKV	FLLPHPGLKV/3	1555.7	A02	10	sp|Q8WXF7|ATLA1_HUMAN
7	10853	RLIALSFGL	RLIALSFGL/2	1550.43	A02	9	sp|O95140|MFN2_HUMAN
5	7751	KMAEMLVEL	KMAEMLVEL/2	1550.2	A02	9	sp|Q9Y605|MOFA1_HUMAN
12	18591	ALLNGEYLL	ALLNGEYLL/2	1549.25	A02	9	sp|Q9BV38|WDR18_HUMAN
12	18555	ALCPRIHEV	ALCPRIHEV/2	1546.25	A02	9	sp|Q09019|DMWD_HUMAN
10	15401	KLLDIPGLEV	KLLDIPGLEV/2	1540.1	A02	10	sp|Q96CD2|COAC_HUMAN
3	4612	RLWDHATMTEV	RLWDHATM[147]TEV/2	1537.33	A02	11	sp|Q9Y3F4|STRAP_HUMAN
10	15362	KVLDFEHFL	KVLDFEHFL/2	1536.2	A02	9	sp|P60660|MYL6_HUMAN
9	13751	KLIDDQDISISL	KLIDDQDISISL/2	1527.89	A02	12	sp|Q96JI7|SPTCS_HUMAN
6	9120	FIADHCPTL	FIADHCPTL/2	1520	A02	9	sp|Q13098|CSN1_HUMAN
6	9080	YILDMFMQL	YILDM[147]FM[147]QL/2	1513.33	A02	9	sp|O43149|ZZEF1_HUMAN
15	22634	KMPEINAKV	KM[147]PEINAKV/2	1508.93	A02	9	sp|Q15011|HERP1_HUMAN
8	12062	FILPFIIAA	FILPFIIAA/2	1507.75	A02	9	sp|P00156|CYB_HUMAN
7	10536	ALADGVTMQV	ALADGVTM[147]QV/2	1505.14	A02	10	sp|Q9UBF2|COPG2_HUMAN
9	13541	ILNPYNLFL	ILNPYNLFL/2	1504.56	A02	9	sp|Q9UGL1|KDM5B_HUMAN
13	19550	WLEENVHEV	WLEENVHEV/2	1503.85	A02	9	sp|Q9BQ70|TCF25_HUMAN
13	19511	SLASLLAKV	SLASLLAKV/2	1500.85	A02	9	sp|Q9NR09|BIRC6_HUMAN
13	19478	SLLDSCTKL	SLLDSCTKL/2	1498.31	A02	9	sp|P50991|TCPD_HUMAN
14	20953	YLDQTLPRA	YLDQTLPRA/2	1496.64	A02	9	sp|A8MPP1|D11L8_HUMAN
9	13380	YMVHIQVTL	YM[147]VHIQVTL/2	1486.67	A02	9	sp|P32970|CD70_HUMAN
10	14863	LLIPFTIFM	LLIPFTIFM[147]/2	1486.3	A02	9	sp|P51685|CCR8_HUMAN
10	14846	MLDSLRIYL	M[147]LDSLRIYL/2	1484.6	A02	9	sp|Q9Y4A5|TRRAP_HUMAN
12	17815	VLFENTDSVHL	VLFENTDSVHL/2	1484.58	A02	11	sp|P42696|RBM34_HUMAN
15	22237	GLIGQLDEV	GLIGQLDEV/2	1482.47	A02	9	sp|Q9UL15|BAG5_HUMAN
9	13330	VLLSPVPEL	VLLSPVPEL/2	1481.11	A02	9	sp|Q9H1A4|APC1_HUMAN
9	13294	RLIEETISI	RLIEETISI/2	1477.11	A02	9	sp|O95249|GOSR1_HUMAN
13	19065	FLYIGIITI	FLYIGIITI/2	1466.54	A02	9	sp|P19397|CD53_HUMAN
16	23365	GLNEEIARV	GLNEEIARV/2	1460.31	A02	9	sp|O14777|NDC80_HUMAN
10	14596	ALSDHHIYL	ALSDHHIYL/2	1459.6	A02	9	sp|P04075|ALDOA_HUMAN
15	21893	ALAEEVEQV	ALAEEVEQV/2	1459.53	A02	9	sp|Q9BQE5|APOL2_HUMAN
9	13101	ALWSLPLYL	ALWSLPLYL/2	1455.67	A02	9	sp|O15287|FANCG_HUMAN
12	17346	ALYPHLPPEA	ALYPHLPPEA/2	1445.5	A02	10	sp|Q13501|SQSTM_HUMAN
11	15848	SMYDKVLML	SM[147]YDKVLM[147]L/2	1440.73	A02	9	sp|Q9Y5Q8|TF3C5_HUMAN
14	20153	KLFEGENEHL	KLFEGENEHL/3	1439.5	A02	10	sp|Q13576|IQGA2_HUMAN
14	20074	LLHSFVDSV	LLHSFVDSV/2	1433.86	A02	9	sp|Q12772|SRBP2_HUMAN
9	12886	LLATVLQAV	LLATVLQAV/2	1431.78	A02	9	sp|O60613|SEP15_HUMAN
14	19955	AMIELVERL	AMIELVERL/2	1425.36	A02	9	sp|Q96DX7|TRI44_HUMAN
11	15612	KLYEQHHVV	KLYEQHHVV/3	1419.27	A02	9	sp|Q15392|DHC24_HUMAN
13	18417	KIIKIIITV	KIIKIIITV/2	1416.69	A02	9	sp|Q15149|PLEC_HUMAN
14	19814	LLDRIVSV	LLDRIVSV/2	1415.29	A02	8	sp|Q92621|NU205_HUMAN
10	14138	KLIGDTPIDTFL	KLIGDTPIDTFL/2	1413.8	A02	12	sp|P19793|RXRA_HUMAN
12	16942	VLASLIIRL	VLASLIIRL/2	1411.83	A02	9	sp|Q92878|RAD50_HUMAN
13	18323	SLLDNLLTI	SLLDNLLTI/2	1409.46	A02	9	sp|Q86VV8|RTTN_HUMAN
13	18252	VLMKDVQEI	VLM[147]KDVQEI/2	1404	A02	9	sp|Q9BRT6|LLPH_HUMAN
15	21047	FMLPDPQNI	FM[147]LPDPQNI/2	1403.13	A02	9	sp|Q8WW01|SEN15_HUMAN
13	18197	VLFSSPPVILL	VLFSSPPVILL/2	1399.77	A02	11	sp|P04156|PRIO_HUMAN
15	20990	TLIGLSIKV	TLIGLSIKV/2	1399.33	A02	9	sp|Q9Y3D0|MIP18_HUMAN
14	19521	ALVSTIIMV	ALVSTIIM[147]V/2	1394.36	A02	9	sp|Q96SN7|ORAI2_HUMAN
14	19456	KLHDVELHQV	KLHDVELHQV/3	1389.71	A02	10	sp|O14775|GBB5_HUMAN
15	20816	SLPDIKVYL	SLPDIKVYL/2	1387.73	A02	9	sp|O43566|RGS14_HUMAN
12	16649	YLTNEGIQYL	YLTNEGIQYL/2	1387.42	A02	10	sp|P46783|RS10_HUMAN
9	12485	GLMGAGIAQV	GLMGAGIAQV/2	1387.22	A02	10	sp|P40939|ECHA_HUMAN
10	13774	GLAPFLLNAV	GLAPFLLNAV/2	1377.4	A02	10	sp|A6NFQ2|F115C_HUMAN
12	16527	VLIKNLLVSV	VLIKNLLVSV/2	1377.25	A02	10	sp|Q9UPN3|MACF1_HUMAN
6	8262	FLAHIYTEL	FLAHIYTEL/2	1377	A02	9	sp|Q9UJX2|CDC23_HUMAN
15	20555	LLDPNVKSIFV	LLDPNVKSIFV/2	1370.33	A02	11	sp|O43414|ERI3_HUMAN
15	20555	TLIDLPGITKV	TLIDLPGITKV/2	1370.33	A02	11	sp|P50570|DYN2_HUMAN
9	12306	ALAGVSFEI	ALAGVSFEI/2	1367.33	A02	9	sp|Q15155|NOMO1_HUMAN
8	10937	ALVDHVAEL	ALVDHVAEL/2	1367.12	A02	9	sp|B0I1T2|MYO1G_HUMAN
12	16233	VLIETLVTL	VLIETLVTL/2	1352.75	A02	9	sp|P23526|SAHH_HUMAN
12	16233	SLQEVAMFL	SLQEVAM[147]FL/2	1352.75	A02	9	sp|Q9BV73|CP250_HUMAN
14	18933	SLLESVQKL	SLLESVQKL/2	1352.36	A02	9	sp|Q13535|ATR_HUMAN
7	9439	FLLPTGVYL	FLLPTGVYL/2	1348.43	A02	9	sp|O00329|PK3CD_HUMAN
17	22894	SLQDEIQRV	SLQDEIQRV/2	1346.71	A02	9	sp|Q9UNX4|WDR3_HUMAN
13	17471	KLIDETQDMLL	KLIDETQDM[147]LL/2	1343.92	A02	11	sp|Q5T4S7|UBR4_HUMAN
17	22807	ILYDKLEKI	ILYDKLEKI/2	1341.59	A02	9	sp|Q99832|TCPH_HUMAN
14	18774	FLDPNNIPKA	FLDPNNIPKA/2	1341	A02	10	sp|Q9BVK2|ALG8_HUMAN
10	13373	SLAADIPRL	SLAADIPRL/2	1337.3	A02	9	sp|Q8N0X4|CLYBL_HUMAN
8	10616	LLLDVPTAAV	LLLDVPTAAV/2	1327	A02	10	sp|P13284|GILT_HUMAN
13	17238	VLFDVTGQVRL	VLFDVTGQVRL/2	1326	A02	11	sp|Q14764|MVP_HUMAN
14	18481	ALLEADVNIKL	ALLEADVNIKL/2	1320.07	A02	11	sp|P61011|SRP54_HUMAN
8	10491	AMNGHVPAV	AM[147]NGHVPAV/2	1311.38	A02	9	sp|Q8IWZ3|ANKH1_HUMAN
14	18350	VLTEFTREV	VLTEFTREV/2	1310.71	A02	9	sp|Q96P70|IPO9_HUMAN
11	14333	KLHYVVTEV	KLHYVVTEV/2	1303	A02	9	sp|Q9Y4A5|TRRAP_HUMAN
14	18174	ALSDLEITL	ALSDLEITL/2	1298.14	A02	9	sp|Q96AC1|FERM2_HUMAN
15	19457	YLSVKVWDL	YLSVKVWDL/2	1297.13	A02	9	sp|Q66LE6|2ABD_HUMAN
10	12837	VLMDLKALLL	VLM[147]DLKALLL/2	1283.7	A02	10	sp|Q9UJV9|DDX41_HUMAN
11	14111	ALLSGIVSI	ALLSGIVSI/2	1282.82	A02	9	sp|Q13505|MTX1_HUMAN
16	20519	IIDGKIFCV	IIDGKIFCV/2	1282.44	A02	9	sp|P60510|PP4C_HUMAN
14	17925	TLQEVHFLL	TLQEVHFLL/2	1280.36	A02	9	sp|Q460N5|PAR14_HUMAN
10	12777	RLLPKVQEV	RLLPKVQEV/2	1277.7	A02	9	sp|Q86UD0|SAPC2_HUMAN
16	20421	ALLDKLYA	ALLDKLYA/2	1276.31	A02	8	sp|Q9NV31|IMP3_HUMAN
14	17855	KLWPEASKVKV	KLWPEASKVKV/3	1275.36	A02	11	sp|Q9NZJ4|SACS_HUMAN
10	12714	FLLPHPGLQV	FLLPHPGLQV/2	1271.4	A02	10	sp|Q6DD88|ATLA3_HUMAN
15	19066	LLVPTSGIYFV	LLVPTSGIYFV/2	1271.07	A02	11	sp|P01374|TNFB_HUMAN
16	20325	NMYGKVVTV	NMYGKVVTV/2	1270.31	A02	9	sp|O00267|SPT5H_HUMAN
12	15241	KLQEFLQTL	KLQEFLQTL/2	1270.08	A02	9	sp|Q9NVI1|FANCI_HUMAN
17	21590	TLVYHVVGV	TLVYHVVGV/2	1270	A02	9	sp|Q15393|SF3B3_HUMAN
15	19049	KLILLITQV	KLILLITQV/2	1269.93	A02	9	sp|Q15061|WDR43_HUMAN
9	11425	HLAEVSAEV	HLAEVSAEV/2	1269.44	A02	9	sp|O95229|ZWINT_HUMAN
18	22849	LMQTEVHHV	LM[147]QTEVHHV/3	1269.39	A02	9	sp|Q6ZSZ5|ARHGI_HUMAN
7	8882	YLTPLILTL	YLTPLILTL/2	1268.86	A02	9	sp|Q9NX61|T161A_HUMAN
4	5063	TLMGHMLYL	TLM[147]GHM[147]LYL/2	1265.75	A02	9	sp|Q9Y450|HBS1L_HUMAN
15	18945	HLVPEVPTV	HLVPEVPTV/2	1263	A02	9	sp|O15156|ZBT7B_HUMAN
18	22724	TLDEKIEKV	TLDEKIEKV/2	1262.44	A02	9	sp|Q96GQ7|DDX27_HUMAN
14	17636	FLPDPSALQNL	FLPDPSALQNL/2	1259.71	A02	11	sp|Q9NXR7|BRE_HUMAN
16	20071	ILNPEVVTV	ILNPEVVTV/2	1254.44	A02	9	sp|Q9UK61|F208A_HUMAN
16	19992	SLFPHNPQFI	SLFPHNPQFI/2	1249.5	A02	10	sp|Q9H9Y2|RPF1_HUMAN
17	21234	SLLENIAKA	SLLENIAKA/2	1249.06	A02	9	sp|Q93074|MED12_HUMAN
14	17466	SLVAILQSV	SLVAILQSV/2	1247.57	A02	9	sp|Q96BM0|I27L1_HUMAN
14	17381	ALHDILTEI	ALHDILTEI/2	1241.5	A02	9	sp|P40937|RFC5_HUMAN
17	20978	KLFKAPAYI	KLFKAPAYI/2	1234	A02	9	sp|Q14CB8|RHG19_HUMAN
14	17250	VLMEKPDVVV	VLM[147]EKPDVVV/2	1232.14	A02	10	sp|Q9NY93|DDX56_HUMAN
14	17229	KVLGIVVGV	KVLGIVVGV/2	1230.64	A02	9	sp|A5YKK6|CNOT1_HUMAN
12	14766	VLYPHEPTAV	VLYPHEPTAV/2	1230.5	A02	10	sp|Q9NYP3|DONS_HUMAN
13	15992	KMVSIQITL	KM[147]VSIQITL/2	1230.15	A02	9	sp|O00203|AP3B1_HUMAN
10	12278	TLSDIMVSL	TLSDIMVSL/2	1227.8	A02	9	sp|Q9NXF1|TEX10_HUMAN
10	12255	KLLEPVLLL	KLLEPVLLL/2	1225.5	A02	9	sp|P62249|RS16_HUMAN
9	10992	YLYNEGLSV	YLYNEGLSV/2	1221.33	A02	9	sp|P41002|CCNF_HUMAN
13	15874	ILDPHVVLL	ILDPHVVLL/2	1221.08	A02	9	sp|Q99567|NUP88_HUMAN
16	19520	KLYQEVEIASV	KLYQEVEIASV/2	1220	A02	11	sp|Q92900|RENT1_HUMAN
16	19519	TLWEIAKAEV	TLWEIAKAEV/2	1219.94	A02	10	sp|Q8TCX1|DC2L1_HUMAN
15	18264	ALLTVVSQV	ALLTVVSQV/2	1217.6	A02	9	sp|Q9Y5S1|TRPV2_HUMAN
8	9695	KLLDIRSYL	KLLDIRSYL/3	1211.88	A02	9	sp|P51665|PSMD7_HUMAN
17	20569	TLVDFPLHL	TLVDFPLHL/2	1209.94	A02	9	sp|Q8WXG6|MADD_HUMAN
4	4812	YLSKIIPAL	YLSKIIPAL/2	1203	A02	9	sp|P40937|RFC5_HUMAN
16	19246	VMFRTPLASV	VM[147]FRTPLASV/2	1202.88	A02	10	sp|Q9UKT4|FBX5_HUMAN
15	17997	ALAEALKEV	ALAEALKEV/2	1199.8	A02	9	sp|Q6PI26|SHQ1_HUMAN
8	9578	ALLPDLPAL	ALLPDLPAL/2	1197.25	A02	9	sp|Q8NC60|NOA1_HUMAN
16	19128	VLFELKLLL	VLFELKLLL/2	1195.5	A02	9	sp|Q8N1F7|NUP93_HUMAN
17	20273	NLLPKLHIV	NLLPKLHIV/2	1192.53	A02	9	sp|O00299|CLIC1_HUMAN
16	19013	VLLESKILL	VLLESKILL/2	1188.31	A02	9	sp|Q5VZ89|DEN4C_HUMAN
14	16633	ILSEVQQAV	ILSEVQQAV/2	1188.07	A02	9	sp|P09874|PARP1_HUMAN
9	10563	RLYSVSYLL	RLYSVSYLL/2	1173.67	A02	9	sp|P21333|FLNA_HUMAN
13	15194	SLAELKGFEV	SLAELKGFEV/2	1168.77	A02	10	sp|Q07864|DPOE1_HUMAN
15	17520	VMGKIFAV	VM[147]GKIFAV/2	1168	A02	8	sp|Q9P2G9|KLHL8_HUMAN
12	13995	KLWEMDNML	KLWEM[147]DNM[147]L/2	1166.25	A02	9	sp|Q9Y605|MOFA1_HUMAN
16	18641	FLAKLIAQA	FLAKLIAQA/2	1165.06	A02	9	sp|P50990|TCPQ_HUMAN
18	20967	GLVGALMHV	GLVGALM[147]HV/2	1164.83	A02	9	sp|P42768|WASP_HUMAN
13	15096	SLINVGLISV	SLINVGLISV/2	1161.23	A02	10	sp|Q92688|AN32B_HUMAN
17	19662	ILSKDGVLYV	ILSKDGVLYV/2	1156.59	A02	10	sp|Q9H1A4|APC1_HUMAN
17	19652	SLADLQNDEV	SLADLQNDEV/2	1156	A02	10	sp|P61247|RS3A_HUMAN
12	13853	KMHARDFTV	KM[147]HARDFTV/2	1154.42	A02	9	sp|P60842|IF4A1_HUMAN
19	21906	NLVSFLETV	NLVSFLETV/2	1152.95	A02	9	sp|Q9GZX9|TWSG1_HUMAN
15	17274	RIIDVVYNA	RIIDVVYNA/2	1151.6	A02	9	sp|P62241|RS8_HUMAN
17	19567	GLLPEHFLFLA	GLLPEHFLFLA/2	1151	A02	11	sp|P42226|STAT6_HUMAN
18	20683	VLFGKPMVV	VLFGKPM[147]VV/2	1149.06	A02	9	sp|Q96LT9|RBM40_HUMAN
15	17140	RLFNDPVAMV	RLFNDPVAM[147]V/2	1142.67	A02	10	sp|Q92685|ALG3_HUMAN
18	20545	CLLPTLIVV	CLLPTLIVV/2	1141.39	A02	9	reverse_sp|Q96DZ1|ERLEC_HUMAN
16	18226	KLVKEVIAV	KLVKEVIAV/2	1139.12	A02	9	sp|P38117|ETFB_HUMAN
15	17037	SIYGGFLLGV	SIYGGFLLGV/2	1135.8	A02	10	sp|P35606|COPB2_HUMAN
14	15865	KLYPQLPAEI	KLYPQLPAEI/2	1133.21	A02	10	sp|Q9HCE0|EPG5_HUMAN
14	15842	VLWGETVHL	VLWGETVHL/2	1131.57	A02	9	sp|P41279|M3K8_HUMAN
11	12446	KLIPLLLQL	KLIPLLLQL/2	1131.45	A02	9	sp|Q15155|NOMO1_HUMAN
20	22527	VLLTRLENV	VLLTRLENV/2	1126.35	A02	9	sp|Q8TBE0|BAHD1_HUMAN
19	21306	KQVEEIFNL	KQVEEIFNL/2	1121.37	A02	9	sp|P78347|GTF2I_HUMAN
17	19029	AIIDGKIFCV	AIIDGKIFCV/2	1119.35	A02	10	sp|P60510|PP4C_HUMAN
13	14506	ALNSKILSV	ALNSKILSV/2	1115.85	A02	9	sp|Q96NW4|ANR27_HUMAN
18	20027	SLQSTILGV	SLQSTILGV/2	1112.61	A02	9	sp|Q86WA8|LONP2_HUMAN
7	7765	FLVEHNLVL	FLVEHNLVL/2	1109.29	A02	9	sp|Q9Y4C1|KDM3A_HUMAN
18	19817	KLIEKLDIKL	KLIEKLDIKL/3	1100.94	A02	10	sp|P13639|EF2_HUMAN
17	18700	FLLDPVKGERL	FLLDPVKGERL/3	1100	A02	11	sp|Q15149|PLEC_HUMAN
16	17542	AIVDKVPSV	AIVDKVPSV/2	1096.38	A02	9	sp|Q9Y678|COPG1_HUMAN
17	18436	KVFDPVPVGV	KVFDPVPVGV/2	1084.47	A02	10	sp|Q08211|DHX9_HUMAN
14	15170	KLQEKIQEL	KLQEKIQEL/2	1083.57	A02	9	sp|Q02224|CENPE_HUMAN
13	13989	YVVPFVAKV	YVVPFVAKV/2	1076.08	A02	9	sp|A5YKK6|CNOT1_HUMAN
19	20412	ILHDDEVTV	ILHDDEVTV/2	1074.32	A02	9	sp|P05386|RLA1_HUMAN
18	19314	GLYQGQVLV	GLYQGQVLV/2	1073	A02	9	sp|Q9Y4E8|UBP15_HUMAN
20	21418	GLVGSLQEV	GLVGSLQEV/2	1070.9	A02	9	sp|Q9H1A4|APC1_HUMAN
17	18186	VLQDIQVML	VLQDIQVM[147]L/2	1069.77	A02	9	sp|P33992|MCM5_HUMAN
12	12818	YIGPVLVSV	YIGPVLVSV/2	1068.17	A02	9	sp|O00159|MYO1C_HUMAN
20	21321	SLFEKGLKNV	SLFEKGLKNV/2	1066.05	A02	10	sp|Q9UKA1|FBXL5_HUMAN
19	20217	ALYDNVEKL	ALYDNVEKL/2	1064.05	A02	9	sp|P08243|ASNS_HUMAN
12	12731	ALFPGVALL	ALFPGVALL/2	1060.92	A02	9	sp|P30101|PDIA3_HUMAN
17	17995	LLLDMQNRL	LLLDM[147]QNRL/2	1058.53	A02	9	sp|Q16531|DDB1_HUMAN
18	19048	SILEHQIQV	SILEHQIQV/2	1058.22	A02	9	sp|P33991|MCM4_HUMAN
18	18983	TLIGIVLGL	TLIGIVLGL/2	1054.61	A02	9	sp|Q05086|UBE3A_HUMAN
19	20006	ALSGHLETV	ALSGHLETV/2	1052.95	A02	9	sp|P07355|ANXA2_HUMAN
17	17892	HLTDITLKV	HLTDITLKV/2	1052.47	A02	9	sp|Q15046|SYK_HUMAN
22	23153	GLIEILKKV	GLIEILKKV/2	1052.41	A02	9	sp|O14737|PDCD5_HUMAN
12	12566	NLAKCIVSV	NLAKCIVSV/2	1047.17	A02	9	sp|Q96GQ5|CP058_HUMAN
9	9410	TLAKYLMEL	TLAKYLM[147]EL/2	1045.56	A02	9	sp|O95067|CCNB2_HUMAN
12	12534	YLFDRNGVCL	YLFDRNGVCL/2	1044.5	A02	10	sp|Q9Y5R8|TPPC1_HUMAN
18	18763	VLLDTANKKVFL	VLLDTANKKVFL/2	1042.39	A02	12	sp|P08243|ASNS_HUMAN
19	19796	NIIELVHQV	NIIELVHQV/2	1041.89	A02	9	sp|P43405|KSYK_HUMAN
12	12494	LIWPLLSTV	LIWPLLSTV/2	1041.17	A02	9	sp|Q99567|NUP88_HUMAN
19	19765	SLYREILFL	SLYREILFL/2	1040.26	A02	9	sp|Q5VZ89|DEN4C_HUMAN
19	19710	FLYTGEGDTV	FLYTGEGDTV/2	1037.37	A02	10	sp|P98170|XIAP_HUMAN
16	16584	YLLQEPPRTV	YLLQEPPRTV/2	1036.5	A02	10	sp|Q96IZ0|PAWR_HUMAN
16	16519	ILLNPAYDVYL	ILLNPAYDVYL/2	1032.44	A02	11	sp|Q8TEM1|PO210_HUMAN
10	10307	RLFEGNALL	RLFEGNALL/2	1030.7	A02	9	sp|P46781|RS9_HUMAN
20	20490	PLWGKVFYL	PLWGKVFYL/2	1024.5	A02	9	sp|Q9UBU7|DBF4A_HUMAN
18	18410	YLYTKEQLL	YLYTKEQLL/2	1022.78	A02	9	sp|Q9Y4W6|AFG32_HUMAN
18	18360	RLLPELRDWGV	RLLPELRDWGV/3	1020	A02	11	sp|Q96G46|DUS3L_HUMAN
10	10196	FLSEHPNVTL	FLSEHPNVTL/2	1019.6	A02	10	sp|Q9UH17|ABC3B_HUMAN
16	16287	GMYGKIAVMEL	GM[147]YGKIAVM[147]EL/2	1017.94	A02	11	sp|Q16531|DDB1_HUMAN
18	18239	ALPPVLTTV	ALPPVLTTV/2	1013.28	A02	9	sp|Q6PKG0|LARP1_HUMAN
15	15191	SLTGHISTV	SLTGHISTV/2	1012.73	A02	9	sp|O43660|PLRG1_HUMAN
13	13157	ALFGTILEL	ALFGTILEL/2	1012.08	A02	9	sp|P30679|GNA15_HUMAN
17	17147	ALPEIFTEL	ALPEIFTEL/2	1008.65	A02	9	sp|P41091|IF2G_HUMAN
19	19141	GLLAGDRLVEV	GLLAGDRLVEV/2	1007.42	A02	11	sp|O14745|NHRF1_HUMAN
12	12073	ALASVIMGL	ALASVIM[147]GL/2	1006.08	A02	9	sp|P30154|2AAB_HUMAN
7	7034	RLYPWGVVEV	RLYPWGVVEV/2	1004.86	A02	10	sp|Q15019|SEPT2_HUMAN
19	19041	LLSPVVPQI	LLSPVVPQI/2	1002.16	A02	9	sp|Q8N1F7|NUP93_HUMAN
14	14018	KLADQCTGL	KLADQCTGL/2	1001.29	A02	9	sp|Q71U36|TBA1A_HUMAN
18	17974	TLLDGKLVLL	TLLDGKLVLL/2	998.556	A02	10	sp|Q86YV0|RASL3_HUMAN
7	6970	KLLPSVTEL	KLLPSVTEL/2	995.714	A02	9	sp|P21675|TAF1_HUMAN
14	13927	SLFERLVVL	SLFERLVVL/2	994.786	A02	9	sp|Q92900|RENT1_HUMAN
21	20874	KLLGNIKNV	KLLGNIKNV/2	994	A02	9	sp|Q00688|FKBP3_HUMAN
23	22777	SLLENLEKI	SLLENLEKI/2	990.304	A02	9	sp|O60812|HNRCL_HUMAN
8	7917	LLMATILHL	LLMATILHL/2	989.625	A02	9	sp|P53618|COPB_HUMAN
18	17791	KIFPAALQLV	KIFPAALQLV/2	988.389	A02	10	sp|P22102|PUR2_HUMAN
12	11850	KLIANNTTV	KLIANNTTV/2	987.5	A02	9	sp|O96019|ACL6A_HUMAN
9	8848	LLLDVTPLSL	LLLDVTPLSL/2	983.111	A02	10	sp|P38646|GRP75_HUMAN
17	16675	TLAETLVNL	TLAETLVNL/2	980.882	A02	9	sp|Q8NB46|ANR52_HUMAN
20	19558	ALAERLDIV	ALAERLDIV/2	977.9	A02	9	sp|Q6QNY0|BL1S3_HUMAN
17	16595	SLQERQVFL	SLQERQVFL/2	976.176	A02	9	sp|O43548|TGM5_HUMAN
22	21456	AMPDSPAEV	AM[147]PDSPAEV/2	975.273	A02	9	sp|O75081|MTG16_HUMAN
21	20377	KLVEFDFLGA	KLVEFDFLGA/2	970.333	A02	10	sp|Q9Y6A5|TACC3_HUMAN
14	13544	FILPKEIAV	FILPKEIAV/2	967.429	A02	9	sp|Q9H1A4|APC1_HUMAN
3	2882	RLWEYLLEL	RLWEYLLEL/2	960.667	A02	9	sp|Q01082|SPTB2_HUMAN
22	21107	GLFAGPCKV	GLFAGPCKV/2	959.409	A02	9	sp|P78527|PRKDC_HUMAN
16	15344	ILQQHIATV	ILQQHIATV/2	959	A02	9	sp|Q9Y575|ASB3_HUMAN
19	18028	ALTGYLHTI	ALTGYLHTI/2	948.842	A02	9	sp|Q9NYY8|FAKD2_HUMAN
20	18913	SISDVIAQV	SISDVIAQV/2	945.65	A02	9	sp|Q9HCJ1|ANKH_HUMAN
19	17835	RLLEESLLSLI	RLLEESLLSLI/2	938.684	A02	11	sp|Q6ZMZ3|SYNE3_HUMAN
16	14927	ALIARVTNV	ALIARVTNV/2	932.938	A02	9	sp|Q9ULZ3|ASC_HUMAN
13	12082	RLTPKLMEV	RLTPKLM[147]EV/2	929.385	A02	9	sp|O15372|EIF3H_HUMAN
19	17614	GIYDGILHSI	GIYDGILHSI/2	927.053	A02	10	sp|Q8N7X4|MAGB6_HUMAN
23	21267	LLDSAPLNV	LLDSAPLNV/2	924.652	A02	9	sp|Q8NI36|WDR36_HUMAN
8	7362	FLQEHNTTL	FLQEHNTTL/2	920.25	A02	9	sp|Q9P219|DAPLE_HUMAN
19	17482	FLNNQEYVL	FLNNQEYVL/2	920.105	A02	9	sp|Q01082|SPTB2_HUMAN
10	9198	FLADPSAFVAA	FLADPSAFVAA/2	919.8	A02	11	sp|Q8NHW5|RLA0L_HUMAN
20	18289	ALFQPHLINV	ALFQPHLINV/2	914.45	A02	10	sp|P61160|ARP2_HUMAN
14	12773	LLASINSTV	LLASINSTV/2	912.357	A02	9	sp|Q16531|DDB1_HUMAN
14	12773	GLYGLIVAL	GLYGLIVAL/2	912.357	A02	9	sp|P27449|VATL_HUMAN
17	15337	ALVSSLHLL	ALVSSLHLL/2	902.176	A02	9	sp|Q9Y678|COPG1_HUMAN
4	3605	YLYGQTTTYL	YLYGQTTTYL/2	901.25	A02	10	sp|P11388|TOP2A_HUMAN
16	14394	KLWEAESKL	KLWEAESKL/2	899.625	A02	9	sp|Q9NYP9|MS18A_HUMAN
22	19772	VMQDPEFLQSV	VM[147]QDPEFLQSV/2	898.727	A02	11	sp|A2A3N6|PIPSL_HUMAN
18	16122	FLADVDKLKL	FLADVDKLKL/3	895.667	A02	10	sp|Q14008|CKAP5_HUMAN
10	8941	FLINTNSEL	FLINTNSEL/2	894.1	A02	9	sp|Q07343|PDE4B_HUMAN
20	17881	KLGSVPVTV	KLGSVPVTV/2	894.05	A02	9	sp|Q9Y4C2|F115A_HUMAN
21	18774	YLVAEKVTV	YLVAEKVTV/2	894	A02	9	sp|Q14568|HS902_HUMAN
18	15862	RLQEEVHLL	RLQEEVHLL/2	881.222	A02	9	sp|Q674X7|KAZRN_HUMAN
20	17609	KLWQTPLHV	KLWQTPLHV/2	880.45	A02	9	sp|Q8NB46|ANR52_HUMAN
8	7043	KLFPDTPLAL	KLFPDTPLAL/2	880.375	A02	10	sp|Q12906|ILF3_HUMAN
24	21016	GLATDVQTV	GLATDVQTV/2	875.667	A02	9	sp|P49720|PSB3_HUMAN
22	19245	SLAQYLINA	SLAQYLINA/2	874.773	A02	9	sp|Q15365|PCBP1_HUMAN
22	18957	GLFSAKLFL	GLFSAKLFL/2	861.682	A02	9	sp|Q14C86|GAPD1_HUMAN
19	16336	ALQSLLHLL	ALQSLLHLL/2	859.789	A02	9	sp|P52294|IMA5_HUMAN
23	19758	ALAKEIDSV	ALAKEIDSV/2	859.043	A02	9	sp|P15153|RAC2_HUMAN
26	22262	KLPEKWESV	KLPEKWESV/2	856.231	A02	9	sp|O76021|RL1D1_HUMAN
25	21324	ALNGHVEMV	ALNGHVEM[147]V/2	852.96	A02	9	sp|Q8N8A2|ANR44_HUMAN
10	8517	YLLPKDQGITL	YLLPKDQGITL/2	851.7	A02	11	sp|O95273|CCDB1_HUMAN
15	12753	YLPPATQVV	YLPPATQVV/2	850.2	A02	9	sp|P38919|IF4A3_HUMAN
23	19509	ALSQDIPEI	ALSQDIPEI/2	848.217	A02	9	sp|Q6P2E9|EDC4_HUMAN
8	6784	FLHEATVRL	FLHEATVRL/3	848	A02	9	sp|Q12772|SRBP2_HUMAN
25	21184	TLGNVLVTV	TLGNVLVTV/2	847.36	A02	9	sp|Q9NV70|EXOC1_HUMAN
16	13535	TLWYRPPEL	TLWYRPPEL/2	845.938	A02	9	sp|Q14004|CDK13_HUMAN
25	21042	TLASIIKEV	TLASIIKEV/2	841.68	A02	9	sp|Q5T4S7|UBR4_HUMAN
18	15140	ALLRTVVSV	ALLRTVVSV/2	841.111	A02	9	sp|Q10471|GALT2_HUMAN
6	5042	FLYPFPLAL	FLYPFPLAL/2	840.333	A02	9	sp|Q5BJD5|TM41B_HUMAN
23	19237	RLAVYIDKV	RLAVYIDKV/2	836.391	A02	9	sp|P20700|LMNB1_HUMAN
26	21690	TLLNVIKSV	TLLNVIKSV/2	834.231	A02	9	sp|Q14643|ITPR1_HUMAN
25	20847	SLCPDLMEI	SLCPDLM[147]EI/2	833.88	A02	9	sp|Q9H8H0|NOL11_HUMAN
19	15830	ALLDVTPKAV	ALLDVTPKAV/2	833.158	A02	10	sp|Q9UDY2|ZO2_HUMAN
5	4164	MLFPGSIAL	M[147]LFPGSIAL/2	832.8	A02	9	sp|Q15691|MARE1_HUMAN
18	14962	YLHNQGIGV	YLHNQGIGV/2	831.222	A02	9	sp|O60566|BUB1B_HUMAN
6	4977	YLIGLDPENLAL	YLIGLDPENLAL/2	829.5	A02	12	sp|Q9UKG9|OCTC_HUMAN
15	12436	RLLEVPVML	RLLEVPVM[147]L/2	829.067	A02	9	sp|Q96AB3|ISOC2_HUMAN
26	21551	TLWNQELYI	TLWNQELYI/2	828.885	A02	9	sp|Q92917|GPKOW_HUMAN
22	18218	QLLPLIVNL	QLLPLIVNL/2	828.091	A02	9	sp|O00410|IPO5_HUMAN
25	20696	YLSDIPLHDA	YLSDIPLHDA/2	827.84	A02	10	sp|Q02153|GCYB1_HUMAN
22	18106	KMDDPDYWRTV	KMDDPDYWRTV/3	823	A02	11	sp|Q14137|BOP1_HUMAN
18	14797	ALAEYACKL	ALAEYACKL/2	822.056	A02	9	sp|Q9UBT7|CTNL1_HUMAN
21	17238	ILLPEPSIRSV	ILLPEPSIRSV/2	820.857	A02	11	sp|P25098|ARBK1_HUMAN
28	22869	QLVDIIEKV	QLVDIIEKV/2	816.75	A02	9	sp|P61289|PSME3_HUMAN
25	20345	ALIDEGETDWKL	ALIDEGETDWKL/2	813.8	A02	12	sp|Q9H2U2|IPYR2_HUMAN
20	16165	LLIPGLATA	LLIPGLATA/2	808.25	A02	9	sp|O15239|NDUA1_HUMAN
26	20959	NIFPYPVGV	NIFPYPVGV/2	806.115	A02	9	sp|Q99590|SCAFB_HUMAN
27	21618	KIFDEILVNA	KIFDEILVNA/2	800.667	A02	10	sp|P11388|TOP2A_HUMAN
24	19151	SLYSQVHQI	SLYSQVHQI/2	797.958	A02	9	sp|Q93074|MED12_HUMAN
25	19649	TIEDGIFEV	TIEDGIFEV/2	785.96	A02	9	sp|P54652|HSP72_HUMAN
25	19559	ALYVAVVNV	ALYVAVVNV/2	782.36	A02	9	sp|Q9BVK8|TM147_HUMAN
22	17189	ALNEKLVNL	ALNEKLVNL/2	781.318	A02	9	sp|O00303|EIF3F_HUMAN
14	10933	KIFEMGPVFTL	KIFEM[147]GPVFTL/2	780.929	A02	11	sp|P00403|COX2_HUMAN
25	19456	SLLHLGALYGI	SLLHLGALYGI/2	778.24	A02	11	sp|O00767|ACOD_HUMAN
13	10038	RLNEKNYEL	RLNEKNYEL/2	772.154	A02	9	sp|Q9UI12|VATH_HUMAN
19	14620	SILRHVAEV	SILRHVAEV/2	769.474	A02	9	sp|P05198|IF2A_HUMAN
18	13832	RLQDELVTL	RLQDELVTL/2	768.444	A02	9	sp|Q9UPN3|MACF1_HUMAN
27	20717	QLIPALAKV	QLIPALAKV/2	767.296	A02	9	sp|O00167|EYA2_HUMAN
15	11445	ALSELATAV	ALSELATAV/2	763	A02	9	sp|Q9BWL3|CA043_HUMAN
29	22127	LLYDLADQLHA	LLYDLADQLHA/2	763	A02	11	sp|P13804|ETFA_HUMAN
27	20589	KLDNQVSKV	KLDNQVSKV/2	762.556	A02	9	sp|Q9Y2D8|ADIP_HUMAN
26	19723	VMFGGKQVVV	VMFGGKQVVV/2	758.577	A02	10	sp|O43865|SAHH2_HUMAN
11	8336	SLYKGLLSV	SLYKGLLSV/2	757.818	A02	9	sp|Q9Y620|RA54B_HUMAN
23	17345	TLSDLRVYL	TLSDLRVYL/2	754.13	A02	9	sp|Q9BYN0|SRXN1_HUMAN
22	16547	TLLGHEFVL	TLLGHEFVL/2	752.136	A02	9	sp|P30260|CDC27_HUMAN
13	9739	MLANDIARL	M[147]LANDIARL/2	749.154	A02	9	sp|Q9H4M9|EHD1_HUMAN
17	12728	YLHREVVEL	YLHREVVEL/2	748.706	A02	9	sp|Q9H1B5|XYLT2_HUMAN
25	18714	AIQDKLFQV	AIQDKLFQV/2	748.56	A02	9	sp|Q9BRQ6|CHCH6_HUMAN
18	13460	ILIRPLVSV	ILIRPLVSV/2	747.778	A02	9	sp|O75027|ABCB7_HUMAN
22	16402	ILNPLLTLL	ILNPLLTLL/2	745.545	A02	9	sp|O60684|IMA7_HUMAN
20	14818	ALAGDQPSV	ALAGDQPSV/2	740.9	A02	9	sp|P21333|FLNA_HUMAN
21	15550	KLYNPENIYL	KLYNPENIYL/2	740.476	A02	10	sp|P23258|TBG1_HUMAN
28	20655	LLEPFVHQV	LLEPFVHQV/2	737.679	A02	9	sp|Q9UHH9|IP6K2_HUMAN
28	20529	KLISELQKL	KLISELQKL/2	733.179	A02	9	sp|Q5UIP0|RIF1_HUMAN
27	19664	VLLRVLILL	VLLRVLILL/2	728.296	A02	9	sp|O14672|ADA10_HUMAN
29	21071	YLFREPATI	YLFREPATI/2	726.586	A02	9	sp|O00217|NDUS8_HUMAN
16	11594	ALFPHLLQPVL	ALFPHLLQPVL/2	724.625	A02	11	sp|P55060|XPO2_HUMAN
28	20275	KLYGPEGLELV	KLYGPEGLELV/2	724.107	A02	11	sp|Q02556|IRF8_HUMAN
28	20155	ALIGSLVGA	ALIGSLVGA/2	719.821	A02	9	sp|Q86XK7|VSIG1_HUMAN
19	13590	RIIDTVAQV	RIIDTVAQV/2	715.263	A02	9	sp|Q9UKK3|PARP4_HUMAN
17	12123	FLLQLTELTL	FLLQLTELTL/2	713.118	A02	10	sp|P0C7T4|HMSDV_HUMAN
16	11387	KLQNIMMLL	KLQNIM[147]M[147]LL/2	711.688	A02	9	sp|Q9NRZ9|HELLS_HUMAN
13	9236	RLFDEPQLASL	RLFDEPQLASL/2	710.462	A02	11	sp|Q9H0C5|BTBD1_HUMAN
25	17703	VLMLQEPLL	VLM[147]LQEPLL/2	708.12	A02	9	sp|P04843|RPN1_HUMAN
21	14735	KILPTLEAV	KILPTLEAV/2	701.667	A02	9	sp|Q12905|ILF2_HUMAN
22	15393	KIAQFLESV	KIAQFLESV/2	699.682	A02	9	sp|Q9NU22|MDN1_HUMAN
32	22316	ILQNKIDLV	ILQNKIDLV/2	697.375	A02	9	sp|P41091|IF2G_HUMAN
20	13933	SLAWDVPAA	SLAWDVPAA/2	696.65	A02	9	sp|P49327|FAS_HUMAN
29	20189	VLNNVVIHL	VLNNVVIHL/2	696.172	A02	9	sp|P42858|HD_HUMAN
22	15266	ALLNVELEL	ALLNVELEL/2	693.909	A02	9	sp|Q99832|TCPH_HUMAN
14	9700	GLAGFTLLL	GLAGFTLLL/2	692.857	A02	9	sp|Q9BVT8|TMUB1_HUMAN
19	13061	GVIDGHIYAV	GVIDGHIYAV/2	687.421	A02	10	sp|Q14145|KEAP1_HUMAN
27	18497	RLPEIYIQL	RLPEIYIQL/2	685.074	A02	9	sp|Q9H223|EHD4_HUMAN
16	10892	MLLATLLLLLL	MLLATLLLLLL/3	680.75	A02	11	sp|Q7Z4F1|LRP10_HUMAN
32	21744	TLLAAEFLKQV	TLLAAEFLKQV/2	679.5	A02	11	sp|Q99832|TCPH_HUMAN
24	16274	FASHVSPEV	FASHVSPEV/2	678.083	A02	9	sp|Q9NP61|ARFG3_HUMAN
24	16170	ILDSRGNPTV	ILDSRGNPTV/2	673.75	A02	10	sp|P13929|ENOB_HUMAN
27	18191	ALLEKGITEA	ALLEKGITEA/2	673.741	A02	10	sp|P41229|KDM5C_HUMAN
30	20194	TLLTAIVKL	TLLTAIVKL/2	673.133	A02	9	sp|P63010|AP2B1_HUMAN
31	20867	LLLDVPTAAVQA	LLLDVPTAAVQA/2	673.129	A02	12	sp|P13284|GILT_HUMAN
21	14117	RLQESVMEA	RLQESVMEA/2	672.238	A02	9	sp|O60216|RAD21_HUMAN
21	14102	YLLTHPPPIM	YLLTHPPPIM[147]/2	671.524	A02	10	sp|Q7Z6Z7|HUWE1_HUMAN
30	20139	NLYPFVKTV	NLYPFVKTV/2	671.3	A02	9	sp|P31939|PUR9_HUMAN
26	17424	GLWGQSVPTA	GLWGQSVPTA/2	670.154	A02	10	sp|Q9UBN6|TR10D_HUMAN
18	11953	YIFPLDDKAAV	YIFPLDDKAAV/2	664.056	A02	11	sp|Q9UKK3|PARP4_HUMAN
11	7301	ALLKGLAAV	ALLKGLAAV/2	663.727	A02	9	sp|Q9P2H5|UBP35_HUMAN
10	6589	LLIENVASL	LLIENVASL/2	658.9	A02	9	sp|P07203|GPX1_HUMAN
22	14480	HLLPTAPTTV	HLLPTAPTTV/2	658.182	A02	10	sp|Q6VMQ6|MCAF1_HUMAN
30	19740	ALIEAEKVAQV	ALIEAEKVAQV/2	658	A02	11	sp|O94905|ERLN2_HUMAN
17	11106	GLAKAVASV	GLAKAVASV/2	653.294	A02	9	sp|P57678|GEMI4_HUMAN
17	11078	LLAETHYQL	LLAETHYQL/2	651.647	A02	9	sp|P49321|NASP_HUMAN
32	20836	GLADASLLKKV	GLADASLLKKV/2	651.125	A02	11	sp|Q9UBB4|ATX10_HUMAN
7	4557	MLAGFITTL	M[147]LAGFITTL/2	651	A02	9	sp|Q9NWH2|TM242_HUMAN
24	15534	KLVNILVQL	KLVNILVQL/2	647.25	A02	9	sp|Q9NR09|BIRC6_HUMAN
29	18738	ALQESLVQI	ALQESLVQI/2	646.138	A02	9	sp|P08240|SRPR_HUMAN
30	19380	GLLDPGMLVNI	GLLDPGM[147]LVNI/2	646	A02	11	sp|P49116|NR2C2_HUMAN
34	21902	ILTDITKGV	ILTDITKGV/2	644.176	A02	9	sp|P13639|EF2_HUMAN
21	13463	SIIGRLLEV	SIIGRLLEV/2	641.095	A02	9	sp|P62136|PP1A_HUMAN
7	4471	FLANIGTSV	FLANIGTSV/2	638.714	A02	9	sp|Q9UKG1|DP13A_HUMAN
27	17166	ALITTILHL	ALITTILHL/2	635.778	A02	9	sp|Q6R327|RICTR_HUMAN
23	14604	KLYQHEINL	KLYQHEINL/2	634.957	A02	9	sp|Q03701|CEBPZ_HUMAN
26	16454	SLFPGQVVI	SLFPGQVVI/2	632.846	A02	9	sp|Q14181|DPOA2_HUMAN
21	13287	TLFPGKVHSL	TLFPGKVHSL/3	632.714	A02	10	sp|Q9NNW5|WDR6_HUMAN
31	19589	LLAELPASVHA	LLAELPASVHA/2	631.903	A02	11	sp|Q14254|FLOT2_HUMAN
32	20163	LMTKEISSV	LM[147]TKEISSV/2	630.094	A02	9	sp|P78527|PRKDC_HUMAN
14	8795	FVHDLVLYL	FVHDLVLYL/2	628.214	A02	9	sp|P53675|CLH2_HUMAN
22	13797	ALAPGLPTA	ALAPGLPTA/2	627.136	A02	9	sp|Q9UMX5|NENF_HUMAN
3	1878	VLWDRTFSL	VLWDRTFSL/2	626	A02	9	sp|P42224|STAT1_HUMAN
16	10004	RLSSVNAEV	RLSSVNAEV/2	625.25	A02	9	sp|Q14246|EMR1_HUMAN
34	21169	TMAKESSIIGV	TMAKESSIIGV/2	622.618	A02	11	sp|Q08257|QOR_HUMAN
35	21739	VLYDQPRHV	VLYDQPRHV/3	621.114	A02	9	sp|Q93074|MED12_HUMAN
31	19211	VLFLGELYL	VLFLGELYL/2	619.71	A02	9	sp|Q9H074|PAIP1_HUMAN
19	11746	ALSGHVSTV	ALSGHVSTV/2	618.211	A02	9	sp|Q9Y283|INVS_HUMAN
24	14783	RLYHITDQV	RLYHITDQV/2	615.958	A02	9	sp|Q9NY97|B3GN2_HUMAN
24	14776	SLWHLPLLL	SLWHLPLLL/2	615.667	A02	9	sp|Q12887|COX10_HUMAN
23	14142	FLDESRSTQYM	FLDESRSTQYM[147]/2	614.87	A02	11	sp|Q9Y230|RUVB2_HUMAN
32	19615	FLASESLIKQI	FLASESLIKQI/2	612.969	A02	11	sp|P62906|RL10A_HUMAN
3	1828	FLWPGLNVPL	FLWPGLNVPL/2	609.333	A02	10	sp|P82675|RT05_HUMAN
26	15734	RLHDENILL	RLHDENILL/2	605.154	A02	9	sp|Q68CZ1|FTM_HUMAN
34	20459	VLMTEDIKL	VLM[147]TEDIKL/2	601.735	A02	9	sp|Q04637|IF4G1_HUMAN
32	19072	KIQEILTQV	KIQEILTQV/2	596	A02	9	sp|O00425|IF2B3_HUMAN
19	11271	LLLPGELAKHAV	LLLPGELAKHAV/3	593.211	A02	12	sp|P33778|H2B1B_HUMAN
25	14554	ALIEGVGILL	ALIEGVGILL/2	582.16	A02	10	sp|O60830|TI17B_HUMAN
32	18604	VLTEHSEEL	VLTEHSEEL/2	581.375	A02	9	sp|Q14155|ARHG7_HUMAN
37	21490	IQDKCVPLV	IQDKCVPLV/2	580.811	A02	9	sp|Q9BS26|ERP44_HUMAN
38	22054	TMIEICEKL	TM[147]IEICEKL/2	580.368	A02	9	sp|P50579|MAP2_HUMAN
7	4051	ILAAHVPTL	ILAAHVPTL/2	578.714	A02	9	sp|P30049|ATPD_HUMAN
24	13879	ALHDHLATI	ALHDHLATI/2	578.292	A02	9	sp|Q02153|GCYB1_HUMAN
34	19634	YLGIVELLV	YLGIVELLV/2	577.471	A02	9	sp|P25963|IKBA_HUMAN
37	21214	ILISKLLGA	ILISKLLGA/2	573.351	A02	9	sp|Q9NYK1|TLR7_HUMAN
31	17563	GLTSAIQAV	GLTSAIQAV/2	566.548	A02	9	sp|Q9Y692|GMEB1_HUMAN
32	18097	RLQEDPPVGV	RLQEDPPVGV/2	565.531	A02	10	sp|P63146|UBE2B_HUMAN
8	4523	FLAEHPNVTL	FLAEHPNVTL/2	565.375	A02	10	sp|Q96AK3|ABC3D_HUMAN
33	18638	LLPEGPPAI	LLPEGPPAI/2	564.788	A02	9	sp|Q15011|HERP1_HUMAN
19	10722	SLAQYNPKL	SLAQYNPKL/2	564.316	A02	9	sp|Q92569|P55G_HUMAN
27	15198	ALLNGEYLLAA	ALLNGEYLLAA/2	562.889	A02	11	sp|Q9BV38|WDR18_HUMAN
29	16142	RLISKFDTV	RLISKFDTV/2	556.621	A02	9	sp|P06730|IF4E_HUMAN
20	11111	SLYGGTITI	SLYGGTITI/2	555.55	A02	9	sp|Q5VTR2|BRE1A_HUMAN
39	21614	SLTGRLDEV	SLTGRLDEV/2	554.205	A02	9	sp|P42226|STAT6_HUMAN
26	14409	KLLDPEDVAVQL	KLLDPEDVAVQL/2	554.192	A02	12	sp|P46939|UTRO_HUMAN
16	8857	RLLNILMQL	RLLNILM[147]QL/2	553.562	A02	9	sp|P28370|SMCA1_HUMAN
25	13824	SLLPPDALVGL	SLLPPDALVGL/2	552.96	A02	11	sp|Q15437|SC23B_HUMAN
30	16471	ALFPAPLAQI	ALFPAPLAQI/2	549.033	A02	10	sp|Q8ND24|RN214_HUMAN
31	16983	NLFNKYPAL	NLFNKYPAL/2	547.839	A02	9	sp|P13797|PLST_HUMAN
33	17996	GLLGTLVQL	GLLGTLVQL/2	545.333	A02	9	sp|P35222|CTNB1_HUMAN
39	21180	ALTELLAKI	ALTELLAKI/2	543.077	A02	9	sp|P30279|CCND2_HUMAN
26	14096	SLLPEGPPAI	SLLPEGPPAI/2	542.154	A02	10	sp|Q15011|HERP1_HUMAN
30	16143	ALAGHQDGITFI	ALAGHQDGITFI/2	538.1	A02	12	sp|Q8TEB1|DCA11_HUMAN
38	20436	TLDDKKVYL	TLDDKKVYL/2	537.789	A02	9	sp|Q567U6|CCD93_HUMAN
18	9676	ALFKAWAL	ALFKAWAL/2	537.556	A02	8	sp|Q15306|IRF4_HUMAN
40	21417	GQFPSYLETV	GQFPSYLETV/2	535.425	A02	10	sp|Q86Y56|HEAT2_HUMAN
43	22975	TLQEFLERI	TLQEFLERI/2	534.302	A02	9	sp|Q9NSI8|SAMN1_HUMAN
35	18698	QLSPRLLEV	QLSPRLLEV/2	534.229	A02	9	sp|Q460N5|PAR14_HUMAN
20	10583	RLIDLGVGL	RLIDLGVGL/2	529.15	A02	9	sp|Q9UGL1|KDM5B_HUMAN
42	22195	KLLEGEECRI	KLLEGEECRI/2	528.452	A02	10	sp|P12036|NFH_HUMAN
13	6858	ALLPSSPTL	ALLPSSPTL/2	527.538	A02	9	sp|Q92994|TF3B_HUMAN
34	17839	GLCERLVSL	GLCERLVSL/2	524.676	A02	9	sp|P78527|PRKDC_HUMAN
21	10987	LLLEPGSLYIL	LLLEPGSLYIL/2	523.19	A02	11	sp|Q9BT30|ALKB7_HUMAN
37	19302	TLTNVIHNL	TLTNVIHNL/2	521.676	A02	9	sp|Q53FV1|ORML2_HUMAN
40	20512	VLSSRLAFA	VLSSRLAFA/2	512.8	A02	9	sp|P79483|DRB3_HUMAN
5	2555	SLMSHAIEL	SLM[147]SHAIEL/2	511	A02	9	sp|Q9Y263|PLAP_HUMAN
31	15778	ALNEQLARL	ALNEQLARL/2	508.968	A02	9	reverse_sp|Q9BV73|CP250_HUMAN
18	9096	KLHDINAQL	KLHDINAQL/2	505.333	A02	9	sp|Q10567|AP1B1_HUMAN
12	6055	KLLEGEESRISL	KLLEGEESRISL/2	504.583	A02	12	sp|P08670|VIME_HUMAN
18	9067	FIHQHFVEV	FIHQHFVEV/3	503.722	A02	9	sp|O94889|KLH18_HUMAN
41	20640	GLAKLIADV	GLAKLIADV/2	503.415	A02	9	sp|P39748|FEN1_HUMAN
11	5529	KVMELLVHL	KVM[147]ELLVHL/3	502.636	A02	9	sp|Q5VYK3|ECM29_HUMAN
39	19574	SMTLAIHEI	SM[147]TLAIHEI/2	501.897	A02	9	sp|O15121|DEGS1_HUMAN
23	11369	SLWKEVSEL	SLWKEVSEL/2	494.304	A02	9	sp|Q03933|HSF2_HUMAN
41	20201	ALFQRPPLI	ALFQRPPLI/2	492.707	A02	9	sp|O60832|DKC1_HUMAN
44	21531	TLNNLEIFL	TLNNLEIFL/2	489.341	A02	9	sp|P52701|MSH6_HUMAN
19	9226	SLFPAELAL	SLFPAELAL/2	485.579	A02	9	sp|Q8WWH5|TRUB1_HUMAN
34	16505	RLQEDPPAGV	RLQEDPPAGV/2	485.441	A02	10	sp|P49459|UBE2A_HUMAN
41	19873	ILSEIKEAV	ILSEIKEAV/2	484.707	A02	9	sp|Q9BQ70|TCF25_HUMAN
25	12013	ALLSAVTRL	ALLSAVTRL/2	480.52	A02	9	sp|P35221|CTNA1_HUMAN
30	14386	NLFNRYPAL	NLFNRYPAL/2	479.533	A02	9	sp|P13796|PLSL_HUMAN
40	19180	YIYDKDMEII	YIYDKDM[147]EII/2	479.5	A02	10	sp|Q9UPT9|UBP22_HUMAN
28	13245	ALFEAAREVTL	ALFEAAREVTL/2	473.036	A02	11	sp|P42858|HD_HUMAN
45	21278	RLFDEPQLA	RLFDEPQLA/2	472.844	A02	9	sp|Q9H0C5|BTBD1_HUMAN
14	6603	RLWPKIQGL	RLWPKIQGL/2	471.643	A02	9	sp|Q9NX09|DDIT4_HUMAN
36	16932	FVYDPLVDWTA	FVYDPLVDWTA/2	470.333	A02	11	sp|Q96Q15|SMG1_HUMAN
34	15797	RMFDGKFVVA	RMFDGKFVVA/3	464.618	A02	10	sp|Q8TAS1|UHMK1_HUMAN
26	11984	GLWEDGRSTLL	GLWEDGRSTLL/2	460.923	A02	11	sp|Q96BA8|CR3L1_HUMAN
7	3212	IVMEHVVFL	IVM[147]EHVVFL/2	458.857	A02	9	sp|Q75V66|ANO5_HUMAN
39	17870	GLSQVAVTV	GLSQVAVTV/2	458.205	A02	9	sp|Q96II8|LRCH3_HUMAN
38	17143	VLADQEVRL	VLADQEVRL/2	451.132	A02	9	sp|O43566|RGS14_HUMAN
6	2701	RLLEATSYL	RLLEATSYL/2	450.167	A02	9	sp|O60341|KDM1A_HUMAN
45	20059	GLTSTDLLFHL	GLTSTDLLFHL/2	445.756	A02	11	sp|Q14181|DPOA2_HUMAN
42	18714	HLLDFPNIVI	HLLDFPNIVI/2	445.571	A02	10	sp|Q6P2Q9|PRP8_HUMAN
23	10128	FLHETGGAMV	FLHETGGAMV/2	440.348	A02	10	sp|Q8IVB4|SL9A9_HUMAN
41	17859	HLLNESPML	HLLNESPM[147]L/2	435.585	A02	9	sp|Q92621|NU205_HUMAN
20	8693	SLIGHLQTL	SLIGHLQTL/2	434.65	A02	9	sp|Q16690|DUS5_HUMAN
28	12165	FVFPGELLL	FVFPGELLL/2	434.464	A02	9	sp|Q15758|AAAT_HUMAN
43	18604	GLAPKPVQV	GLAPKPVQV/2	432.651	A02	9	sp|Q6ZNJ1|NBEL2_HUMAN
14	6052	AIIESTPEL	AIIESTPEL/2	432.286	A02	9	sp|O60271|JIP4_HUMAN
20	8598	FIIQGLRSV	FIIQGLRSV/2	429.9	A02	9	sp|P01906|DQA2_HUMAN
42	17991	KLTEVHEEL	KLTEVHEEL/2	428.357	A02	9	sp|Q9UJC3|HOOK1_HUMAN
38	16275	RLFEVPHELVA	RLFEVPHELVA/3	428.289	A02	11	sp|Q9Y3M8|STA13_HUMAN
18	7695	HLWRGIVSI	HLWRGIVSI/2	427.5	A02	9	sp|Q6DN14|MCTP1_HUMAN
44	18810	ALQERLDGL	ALQERLDGL/2	427.5	A02	9	sp|P55209|NP1L1_HUMAN
47	20059	FIFEKKLAQA	FIFEKKLAQA/2	426.787	A02	10	sp|Q86XL3|ANKL2_HUMAN
22	9305	ALYPGQLVQL	ALYPGQLVQL/2	422.955	A02	10	sp|Q9BRR9|RHG09_HUMAN
32	13516	SLADIAQKL	SLADIAQKL/2	422.375	A02	9	sp|O43242|PSMD3_HUMAN
36	15142	FLLGPRLVLA	FLLGPRLVLA/2	420.611	A02	10	sp|P49755|TMEDA_HUMAN
49	20531	TLLVVVPKL	TLLVVVPKL/2	419	A02	9	sp|P21283|VATC1_HUMAN
34	14191	ALAAALAHI	ALAAALAHI/2	417.382	A02	9	sp|Q9NR30|DDX21_HUMAN
45	18766	SLWGQPAEA	SLWGQPAEA/2	417.022	A02	9	sp|P29400|CO4A5_HUMAN
45	18714	YLDIKGLLDV	YLDIKGLLDV/2	415.867	A02	10	sp|P63208|SKP1_HUMAN
52	21484	LLFEGEKITI	LLFEGEKITI/2	413.154	A02	10	sp|Q9GZM3|RPB1B_HUMAN
31	12796	GLLGAGGTVSV	GLLGAGGTVSV/2	412.774	A02	11	sp|Q3ZCQ8|TIM50_HUMAN
54	22136	QQIDRVVEV	QQIDRVVEV/2	409.926	A02	9	sp|Q5VV42|CDKAL_HUMAN
47	19114	FIYHGEVPQA	FIYHGEVPQA/2	406.681	A02	10	sp|P33076|C2TA_HUMAN
48	19497	VLWMAPDGLYA	VLWM[147]APDGLYA/2	406.188	A02	11	sp|Q15306|IRF4_HUMAN
46	18613	GLDPLGYEIQL	GLDPLGYEIQL/2	404.63	A02	11	sp|P57740|NU107_HUMAN
24	9682	RLAGADVVLGV	RLAGADVVLGV/2	403.417	A02	11	sp|P27708|PYR1_HUMAN
44	17750	VLADRGVCLI	VLADRGVCLI/2	403.409	A02	10	sp|P49736|MCM2_HUMAN
17	6851	RLIPTLVSI	RLIPTLVSI/2	403	A02	9	sp|Q96P70|IPO9_HUMAN
22	8754	KLLPLAGLYL	KLLPLAGLYL/2	397.909	A02	10	sp|Q96ES6|MFSD3_HUMAN
29	11469	HIIENIVAV	HIIENIVAV/2	395.483	A02	9	sp|O76021|RL1D1_HUMAN
35	13734	RLIEETQIFQM	RLIEETQIFQM[147]/2	392.4	A02	11	sp|Q68D86|C102B_HUMAN
15	5834	KLIAQNLEL	KLIAQNLEL/2	388.933	A02	9	sp|P52732|KIF11_HUMAN
31	12054	AIDPHLLLSV	AIDPHLLLSV/2	388.839	A02	10	sp|Q29RF7|PDS5A_HUMAN
47	18215	ALYHLAIKL	ALYHLAIKL/2	387.553	A02	9	sp|Q9UKA4|AKA11_HUMAN
52	20142	SILEDPPSI	SILEDPPSI/2	387.346	A02	9	sp|Q9NVM9|ASUN_HUMAN
44	17018	RLPDDDPTAV	RLPDDDPTAV/2	386.773	A02	10	sp|Q9UBF2|COPG2_HUMAN
42	16133	SLSFMNPRL	SLSFM[147]NPRL/2	384.119	A02	9	sp|Q9Y2T2|AP3M1_HUMAN
23	8813	LLSHVIVAL	LLSHVIVAL/2	383.174	A02	9	sp|Q13535|ATR_HUMAN
46	17626	LLQEVEHQL	LLQEVEHQL/2	383.174	A02	9	sp|O94972|TRI37_HUMAN
38	14444	ALLAGSEYLKL	ALLAGSEYLKL/2	380.105	A02	11	sp|O15371|EIF3D_HUMAN
19	7200	SLLPPTALVGL	SLLPPTALVGL/2	378.947	A02	11	sp|Q15436|SC23A_HUMAN
40	15135	LLDEPTNHL	LLDEPTNHL/2	378.375	A02	9	sp|Q9UG63|ABCF2_HUMAN
61	23000	LLPAIVHI	LLPAIVHI/2	377.049	A02	8	sp|Q92841|DDX17_HUMAN
21	7826	GLAAGGIVAV	GLAAGGIVAV/2	372.667	A02	10	sp|Q9ULH7|MKL2_HUMAN
57	21240	ILGIQPPSV	ILGIQPPSV/2	372.632	A02	9	sp|Q9UPN6|SCAF8_HUMAN
24	8936	ILAQQPLSV	ILAQQPLSV/2	372.333	A02	9	sp|Q6ZRI6|CO039_HUMAN
54	19893	GLLTEIRAV	GLLTEIRAV/2	368.389	A02	9	sp|Q9UEE5|ST17A_HUMAN
45	16552	FAMTDVLDV	FAMTDVLDV/2	367.822	A02	9	reverse_sp|Q8WZ42|TITIN_HUMAN
42	15399	FALPVGLIVGV	FALPVGLIVGV/2	366.643	A02	11	sp|P20333|TNR1B_HUMAN
17	6215	ALAQRLLEV	ALAQRLLEV/2	365.588	A02	9	sp|Q6ZMZ3|SYNE3_HUMAN
63	22936	ILDKKVEKV	ILDKKVEKV/2	364.063	A02	9	sp|Q58FF7|H90B3_HUMAN
61	22143	TLTEEGVIKV	TLTEEGVIKV/2	363	A02	10	sp|Q9BZE4|NOG1_HUMAN
52	18697	KISEVVELL	KISEVVELL/2	359.558	A02	9	sp|P52701|MSH6_HUMAN
44	15677	ALLQQVHSA	ALLQQVHSA/2	356.295	A02	9	sp|Q86XN7|PRSR1_HUMAN
22	7828	RLVDLLLVL	RLVDLLLVL/2	355.818	A02	9	sp|Q9ULT8|HECD1_HUMAN
40	14189	NLANVVLLL	NLANVVLLL/2	354.725	A02	9	sp|Q92620|PRP16_HUMAN
45	15902	ALSSLAVVV	ALSSLAVVV/2	353.378	A02	9	sp|Q5VW36|FOCAD_HUMAN
22	7634	FIYPSNMQTML	FIYPSNM[147]QTM[147]L/2	347	A02	11	sp|Q7Z417|NUFP2_HUMAN
46	15946	FLWKEPATM	FLWKEPATM[147]/2	346.652	A02	9	sp|Q9BQ70|TCF25_HUMAN
64	21941	GLDDIKDLKV	GLDDIKDLKV/2	342.828	A02	10	sp|Q9HCE1|MOV10_HUMAN
37	12539	SIIQRLLEV	SIIQRLLEV/2	338.892	A02	9	sp|P36873|PP1G_HUMAN
65	22003	NMVAKVDEV	NM[147]VAKVDEV/2	338.508	A02	9	sp|P62906|RL10A_HUMAN
61	20434	TLYNTEVLL	TLYNTEVLL/2	334.984	A02	9	sp|Q01543|FLI1_HUMAN
48	15909	SLSPIYPAA	SLSPIYPAA/2	331.438	A02	9	sp|P18858|DNLI1_HUMAN
20	6597	KLADFGDAVQL	KLADFGDAVQL/2	329.85	A02	11	sp|O75962|TRIO_HUMAN
46	15087	IMLKGDNITL	IM[147]LKGDNITL/2	327.978	A02	10	sp|P62304|RUXE_HUMAN
42	13704	KLGEFAKVLEL	KLGEFAKVLEL/2	326.286	A02	11	sp|P30153|2AAA_HUMAN
38	12285	SISPIVLYL	SISPIVLYL/2	323.289	A02	9	sp|Q53FV1|ORML2_HUMAN
53	16969	GLLNRPNPLL	GLLNRPNPLL/2	320.17	A02	10	sp|Q96AD5|PLPL2_HUMAN
15	4775	KVWGNVVTV	KVWGNVVTV/2	318.333	A02	9	sp|O43390|HNRPR_HUMAN
65	20614	SLVENIERLKV	SLVENIERLKV/3	317.138	A02	11	sp|Q12899|TRI26_HUMAN
63	19918	KLGLKPLEV	KLGLKPLEV/2	316.159	A02	9	sp|O43290|SNUT1_HUMAN
70	21829	KLLGKVETA	KLLGKVETA/2	311.843	A02	9	sp|Q6NXR4|TTI2_HUMAN
53	16444	LLIDDKGTIKL	LLIDDKGTIKL/3	310.264	A02	11	sp|P06493|CDK1_HUMAN
71	21949	ALLGDLTKA	ALLGDLTKA/2	309.141	A02	9	sp|Q92973|TNPO1_HUMAN
73	22261	TLLTKPVEI	TLLTKPVEI/2	304.945	A02	9	sp|P19174|PLCG1_HUMAN
43	12982	ALIEGAGILL	ALIEGAGILL/2	301.907	A02	10	sp|Q99595|TI17A_HUMAN
60	17755	VLSNVEVTL	VLSNVEVTL/2	295.917	A02	9	sp|Q14204|DYHC1_HUMAN
63	18487	RLPPEGILHNV	RLPPEGILHNV/3	293.444	A02	11	sp|Q5THJ4|VP13D_HUMAN
44	12901	ALTSVVVTL	ALTSVVVTL/2	293.205	A02	9	sp|Q00534|CDK6_HUMAN
37	10832	ALTPVVVTL	ALTPVVVTL/2	292.757	A02	9	sp|P11802|CDK4_HUMAN
50	14560	AALPNVYEV	AALPNVYEV/2	291.2	A02	9	sp|P33992|MCM5_HUMAN
37	10386	ILLEHKVVL	ILLEHKVVL/2	280.703	A02	9	sp|Q8WXG6|MADD_HUMAN
59	16387	YLGNINPQM	YLGNINPQM[147]/2	277.746	A02	9	sp|O15042|SR140_HUMAN
60	16607	TVYGGVMYI	TVYGGVM[147]YI/2	276.783	A02	9	sp|Q9P2N7|KLH13_HUMAN
8	2195	ALADLLLAL	ALADLLLAL/2	274.375	A02	9	sp|P46092|CCR10_HUMAN
66	18009	RLGEAEGLMKV	RLGEAEGLM[147]KV/3	272.864	A02	11	sp|Q9HBR0|S38AA_HUMAN
19	5183	RLINQVLEL	RLINQVLEL/2	272.789	A02	9	sp|Q9UIL1|SCOC_HUMAN
76	20472	QLLTAIVKL	QLLTAIVKL/2	269.368	A02	9	sp|Q10567|AP1B1_HUMAN
34	9140	TLVDNISTMAL	TLVDNISTM[147]AL/2	268.824	A02	11	sp|Q9NPJ3|ACO13_HUMAN
84	22325	NLISALEEA	NLISALEEA/2	265.774	A02	9	sp|P22102|PUR2_HUMAN
48	12620	ALYSKGILL	ALYSKGILL/2	262.917	A02	9	sp|O75694|NU155_HUMAN
5	1308	MLATRVFSL	M[147]LATRVFSL/2	261.6	A02	9	sp|P13073|COX41_HUMAN
88	22151	TLISELVQA	TLISELVQA/2	251.716	A02	9	sp|Q14999|CUL7_HUMAN
33	8305	RLLEQKVEL	RLLEQKVEL/2	251.667	A02	9	sp|Q9H307|PININ_HUMAN
72	18058	ALEPIDITV	ALEPIDITV/2	250.806	A02	9	sp|O60216|RAD21_HUMAN
86	21351	TLIEELKTL	TLIEELKTL/2	248.267	A02	9	sp|P18846|ATF1_HUMAN
50	12372	RVIGTLEEV	RVIGTLEEV/2	247.44	A02	9	sp|P46060|RAGP1_HUMAN
14	3461	MLAWINESL	M[147]LAWINESL/2	247.214	A02	9	sp|Q15691|MARE1_HUMAN
75	18412	KLQELENRL	KLQELENRL/3	245.493	A02	9	sp|Q8WXH0|SYNE2_HUMAN
14	3419	ALFQHITAL	ALFQHITAL/2	244.214	A02	9	sp|Q9P055|JKAMP_HUMAN
40	9756	KIMTEKELLAV	KIMTEKELLAV/2	243.9	A02	11	sp|Q14254|FLOT2_HUMAN
34	8255	YTSPVNPAV	YTSPVNPAV/2	242.794	A02	9	sp|P61165|TM258_HUMAN
85	20369	GLLGQEGLVEI	GLLGQEGLVEI/2	239.635	A02	11	sp|Q53GL7|PAR10_HUMAN
56	13385	ALIPIPLAVI	ALIPIPLAVI/2	239.018	A02	10	sp|P19256|LFA3_HUMAN
82	19597	QLDDLKVEL	QLDDLKVEL/2	238.988	A02	9	sp|P42766|RL35_HUMAN
38	9050	RLLDRKVLL	RLLDRKVLL/2	238.158	A02	9	sp|Q9H4A5|GLP3L_HUMAN
96	22709	GLPRFGIEMV	GLPRFGIEMV/2	236.552	A02	10	sp|Q9H2Y7|ZN106_HUMAN
52	12232	KLWDPRTPCNA	KLWDPRTPCNA/3	235.231	A02	11	sp|O43684|BUB3_HUMAN
48	11214	KLNVAPLAV	KLNVAPLAV/2	233.625	A02	9	sp|Q6P582|MZT2A_HUMAN
34	7913	KLFQGQLVL	KLFQGQLVL/2	232.735	A02	9	sp|O94782|UBP1_HUMAN
85	19629	TIIDLPGITRV	TIIDLPGITRV/2	230.929	A02	11	sp|P20592|MX2_HUMAN
42	9672	ALDKATVLL	ALDKATVLL/2	230.286	A02	9	sp|Q53EL6|PDCD4_HUMAN
59	13446	QLFQGVLTL	QLFQGVLTL/2	227.898	A02	9	sp|Q9Y5L0|TNPO3_HUMAN
22	5008	VLMQDSRLYL	VLM[147]QDSRLYL/2	227.636	A02	10	sp|P06493|CDK1_HUMAN
99	22507	LLQLEEFEI	LLQLEEFEI/2	227.343	A02	9	reverse_sp|Q9P2K8|E2AK4_HUMAN
81	18394	KVGNFKFIYV	KVGNFKFIYV/2	227.086	A02	10	sp|Q9NSI8|SAMN1_HUMAN
92	20712	GLISVDVRI	GLISVDVRI/2	225.13	A02	9	sp|Q12789|TF3C1_HUMAN
13	2902	RLWNETVEL	RLWNETVEL/2	223.231	A02	9	sp|Q8WUY9|DEP1B_HUMAN
57	12566	SVLKSIQEV	SVLKSIQEV/2	220.456	A02	9	sp|P42285|SK2L2_HUMAN
37	8104	FAIDPHLLLSV	FAIDPHLLLSV/2	219.027	A02	11	sp|Q29RF7|PDS5A_HUMAN
73	15742	AILKYIETL	AILKYIETL/2	215.644	A02	9	sp|O75122|CLAP2_HUMAN
25	5310	LLAPRPVAV	LLAPRPVAV/2	212.4	A02	9	sp|P49918|CDN1C_HUMAN
59	12391	TVAPFNPTV	TVAPFNPTV/2	210.017	A02	9	sp|Q96BU1|S1PBP_HUMAN
63	13229	GLKEGIPAL	GLKEGIPAL/2	209.984	A02	9	sp|P13639|EF2_HUMAN
42	8731	LLDVPTAAV	LLDVPTAAV/2	207.881	A02	9	sp|P13284|GILT_HUMAN
81	16794	VMTLVSTYL	VM[147]TLVSTYL/2	207.333	A02	9	sp|Q9UNL2|SSRG_HUMAN
79	16218	RLHEKIQEA	RLHEKIQEA/3	205.291	A02	9	sp|O75683|SURF6_HUMAN
21	4258	KVLERVNAV	KVLERVNAV/2	202.762	A02	9	sp|Q9UL46|PSME2_HUMAN
83	16621	ALAKIEIKL	ALAKIEIKL/2	200.253	A02	9	sp|P0C7P4|UCRIL_HUMAN
89	17726	ALSIQNYHL	ALSIQNYHL/2	199.169	A02	9	sp|Q01082|SPTB2_HUMAN
80	15920	ALVDQRELYL	ALVDQRELYL/2	199	A02	10	sp|Q9UL33|TPC2L_HUMAN
91	17922	VVVGDLVEV	VVVGDLVEV/2	196.945	A02	9	sp|P05023|AT1A1_HUMAN
112	21872	ALCEENMRGV	ALCEENM[147]RGV/2	195.286	A02	10	sp|P13639|EF2_HUMAN
108	20450	LLGPPPVGV	LLGPPPVGV/2	189.352	A02	9	sp|Q9ULV3|CIZ1_HUMAN
109	20478	IQDNHDGTYTV	IQDNHDGTYTV/2	187.872	A02	11	sp|P21333|FLNA_HUMAN
55	10088	RLMQGDEICL	RLMQGDEICL/2	183.418	A02	10	sp|Q92900|RENT1_HUMAN
8	1424	FLLPTGLSSL	FLLPTGLSSL/2	178	A02	10	sp|A9UHW6|MI4GD_HUMAN
95	16877	VLQQHLETL	VLQQHLETL/2	177.653	A02	9	sp|Q9NP66|HM20A_HUMAN
73	12875	FVFPGELL	FVFPGELL/2	176.37	A02	8	sp|Q15758|AAAT_HUMAN
49	8007	RLIQESPTL	RLIQESPTL/2	163.408	A02	9	sp|Q6P1A2|MBOA5_HUMAN
10	1630	SLIEQTTAL	SLIEQTTAL/2	163	A02	9	sp|Q9NVK5|FGOP2_HUMAN
76	11681	SLDQPTQTV	SLDQPTQTV/2	153.697	A02	9	sp|Q99613|EIF3C_HUMAN
58	8898	SLAGDVALQQL	SLAGDVALQQL/2	153.414	A02	11	sp|Q15021|CND1_HUMAN
107	16410	GLDPNKPPEL	GLDPNKPPEL/2	153.364	A02	10	sp|Q9ULL5|PRR12_HUMAN
134	20528	FLDNGPKTI	FLDNGPKTI/2	153.194	A02	9	sp|P78344|IF4G2_HUMAN
86	13093	TLAEIAKVEL	TLAEIAKVEL/2	152.244	A02	10	sp|Q15233|NONO_HUMAN
14	2123	ALWAGLLTL	ALWAGLLTL/2	151.643	A02	9	sp|P06734|FCER2_HUMAN
67	10112	AVYEGHVSCV	AVYEGHVSCV/2	150.925	A02	10	sp|P58546|MTPN_HUMAN
56	8413	GLFQGKTPL	GLFQGKTPL/2	150.232	A02	9	sp|Q9ULW0|TPX2_HUMAN
136	20358	VLGGKAFLEHL	VLGGKAFLEHL/3	149.691	A02	11	sp|Q8TAP6|CEP76_HUMAN
24	3588	AIAPIIAAV	AIAPIIAAV/2	149.5	A02	9	sp|Q9BQ52|RNZ2_HUMAN
147	21548	ILGPKPQGV	ILGPKPQGV/2	146.585	A02	9	sp|Q8NHS3|MFSD8_HUMAN
17	2453	SLAEGRLYL	SLAEGRLYL/2	144.294	A02	9	sp|Q7Z3E5|ARMC9_HUMAN
109	15728	FVIRNIVEA	FVIRNIVEA/2	144.294	A02	9	sp|Q5JNZ5|RS26L_HUMAN
29	3934	SLIRSVVAL	SLIRSVVAL/2	135.655	A02	9	sp|P51665|PSMD7_HUMAN
24	3186	VMAPRTVLL	VM[147]APRTVLL/2	132.75	A02	9	sp|P01889|1B07_HUMAN
113	14945	ALLQSDVRL	ALLQSDVRL/2	132.257	A02	9	sp|Q15149|PLEC_HUMAN
159	20712	KQLDDLKVEL	KQLDDLKVEL/2	130.264	A02	10	sp|P42766|RL35_HUMAN
162	20967	YCAEIAHNV	YCAEIAHNV/2	129.426	A02	9	sp|P62910|RL32_HUMAN
155	19798	NIFPNPEATFV	NIFPNPEATFV/2	127.729	A02	11	sp|Q9Y5B9|SP16H_HUMAN
132	16824	ILINDAGEVRL	ILINDAGEVRL/2	127.455	A02	11	sp|Q92918|M4K1_HUMAN
146	18469	ILDISEHTL	ILDISEHTL/2	126.5	A02	9	sp|Q9UBU7|DBF4A_HUMAN
167	20222	TLSPRPPLI	TLSPRPPLI/2	121.09	A02	9	sp|Q9H0R1|AP5M1_HUMAN
72	8683	GIMKKAYEL	GIMKKAYEL/2	120.597	A02	9	sp|P11831|SRF_HUMAN
168	20000	ALDPLADKILI	ALDPLADKILI/2	119.048	A02	11	sp|Q9UJA2|CRLS1_HUMAN
82	9753	IVLPAGALHQV	IVLPAGALHQV/2	118.939	A02	11	sp|Q15652|JHD2C_HUMAN
78	9270	KLSLVAAMLLL	KLSLVAAM[147]LLL/2	118.846	A02	11	sp|P11021|GRP78_HUMAN
168	19790	HLSNMEVQV	HLSNM[147]EVQV/2	117.798	A02	9	sp|P12270|TPR_HUMAN
10	1172	ALYGHTQAV	ALYGHTQAV/2	117.2	A02	9	sp|Q6ZS81|WDFY4_HUMAN
172	19728	QVFPGLLERV	QVFPGLLERV/2	114.698	A02	10	sp|Q9UBB4|ATX10_HUMAN
47	5390	RLQETEGMVAV	RLQETEGM[147]VAV/2	114.681	A02	11	sp|Q9UGU5|HMGX4_HUMAN
178	20188	HLSIINEYL	HLSIINEYL/2	113.416	A02	9	sp|P46940|IQGA1_HUMAN
199	22311	AQYENPPHI	AQYENPPHI/2	112.116	A02	9	sp|Q12965|MYO1E_HUMAN
5	559	RLMNDMTAV	RLM[147]NDM[147]TAV/2	111.8	A02	9	sp|Q92598|HS105_HUMAN
65	7207	AVWEGRIYI	AVWEGRIYI/2	110.877	A02	9	sp|Q8N4N3|KLH36_HUMAN
31	3433	KVVALVHAV	KVVALVHAV/2	110.742	A02	9	sp|P24001|IL32_HUMAN
169	18287	TVTTVILEV	TVTTVILEV/2	108.207	A02	9	sp|Q9UKF6|CPSF3_HUMAN
186	20002	LLGPRLVLA	LLGPRLVLA/2	107.538	A02	9	sp|P49755|TMEDA_HUMAN
96	10312	VLTSVTEAL	VLTSVTEAL/2	107.417	A02	9	sp|Q7Z401|MYCPP_HUMAN
164	17511	AILTTLIHL	AILTTLIHL/2	106.774	A02	9	sp|Q9UI26|IPO11_HUMAN
185	19404	ALSNLEVKL	ALSNLEVKL/2	104.886	A02	9	sp|Q86UX7|URP2_HUMAN
106	11028	FVLPVATQI	FVLPVATQI/2	104.038	A02	9	sp|Q99622|C10_HUMAN
6	621	RLMNETTAV	RLM[147]NETTAV/2	103.5	A02	9	sp|O95757|HS74L_HUMAN
209	21614	HLAIKLEQV	HLAIKLEQV/2	103.416	A02	9	sp|Q9Y4B6|VPRBP_HUMAN
153	15595	GLCPHVVVL	GLCPHVVVL/2	101.928	A02	9	sp|P11586|C1TC_HUMAN
216	21064	ATIGELAQV	ATIGELAQV/2	97.519	A02	9	sp|P42345|MTOR_HUMAN
19	1851	YLHDQNPDAAL	YLHDQNPDAAL/2	97.421	A02	11	sp|O14579|COPE_HUMAN
121	11494	VLLKARLVPA	VLLKARLVPA/2	94.992	A02	10	sp|Q6P995|F171B_HUMAN
211	20018	YCYDNIHFM	YCYDNIHFM[147]/2	94.872	A02	9	sp|Q9Y6E2|BZW2_HUMAN
209	18784	TLAQRVKEV	TLAQRVKEV/2	89.876	A02	9	sp|Q9Y679|AUP1_HUMAN
217	19366	ALCPQVINA	ALCPQVINA/2	89.244	A02	9	sp|P35221|CTNA1_HUMAN
221	19653	LIKEVDIYTV	LIKEVDIYTV/2	88.928	A02	10	sp|Q99873|ANM1_HUMAN
235	20787	AMPPPPPQGV	AM[147]PPPPPQGV/2	88.455	A02	10	sp|O60216|RAD21_HUMAN
225	19621	KLVSEKLASYQA	KLVSEKLASYQA/2	87.204	A02	12	sp|P01106|MYC_HUMAN
213	18395	MLPPPPLTA	M[147]LPPPPLTA/2	86.362	A02	9	sp|P18858|DNLI1_HUMAN
232	19700	TLFTKELVL	TLFTKELVL/2	84.914	A02	9	sp|Q7KZF4|SND1_HUMAN
162	13546	FVTLLPIEL	FVTLLPIEL/2	83.617	A02	9	reverse_sp|Q9H7T0|CTSRB_HUMAN
153	12576	KVLDLKINL	KVLDLKINL/2	82.196	A02	9	sp|Q96RL7|VP13A_HUMAN
246	20193	NLINQEIML	NLINQEIM[147]L/2	82.085	A02	9	sp|Q12923|PTN13_HUMAN
253	20521	ILTNVVPKM	ILTNVVPKM[147]/2	81.111	A02	9	sp|Q96BW5|PTER_HUMAN
261	20522	KQYGNEVFL	KQYGNEVFL/2	78.628	A02	9	sp|P50990|TCPQ_HUMAN
30	2316	ALYASRLYL	ALYASRLYL/2	77.2	A02	9	sp|Q96IJ6|GMPPA_HUMAN
282	21641	KIPTPIVGV	KIPTPIVGV/2	76.741	A02	9	sp|P51003|PAPOA_HUMAN
54	4129	ALAEIAKAEL	ALAEIAKAEL/2	76.463	A02	10	sp|P23246|SFPQ_HUMAN
4	301	YLADVTNAL	YLADVTNAL/2	75.25	A02	9	sp|Q5T4S7|UBR4_HUMAN
88	6545	LLYQGPHNTL	LLYQGPHNTL/2	74.375	A02	10	sp|P13612|ITA4_HUMAN
12	885	ALWWGTITL	ALWWGTITL/2	73.75	A02	9	sp|Q9NR82|KCNQ5_HUMAN
14	1025	SLASHIQSL	SLASHIQSL/2	73.214	A02	9	sp|Q6ZS81|WDFY4_HUMAN
232	16371	RLVQGSILKKV	RLVQGSILKKV/3	70.565	A02	11	sp|P12004|PCNA_HUMAN
277	19503	ALLKIEGVYA	ALLKIEGVYA/2	70.408	A02	10	sp|P18077|RL35A_HUMAN
16	1078	ALSEVTAAL	ALSEVTAAL/2	67.375	A02	9	sp|Q13586|STIM1_HUMAN
55	3383	AVFDKTLAEL	AVFDKTLAEL/2	61.509	A02	10	sp|Q6VMQ6|MCAF1_HUMAN
38	2330	RLHERLVAI	RLHERLVAI/3	61.316	A02	9	sp|Q15149|PLEC_HUMAN
313	19027	GLVAGGIIGA	GLVAGGIIGA/2	60.789	A02	10	sp|Q9NPL8|TIDC1_HUMAN
210	12622	ALSQINTKL	ALSQINTKL/2	60.105	A02	9	sp|O95825|QORL1_HUMAN
279	16075	KVFSGALQEA	KVFSGALQEA/2	57.616	A02	10	sp|P78543|BTG2_HUMAN
64	3617	RLLKSKLYL	RLLKSKLYL/3	56.516	A02	9	sp|P10620|MGST1_HUMAN
35	1968	RVLDPSMVILEV	RVLDPSM[147]VILEV/2	56.229	A02	12	sp|Q9UJX6|ANC2_HUMAN
369	20551	SLVQRVETI	SLVQRVETI/2	55.694	A02	9	sp|Q9H8V3|ECT2_HUMAN
94	5159	RLIAQRYLL	RLIAQRYLL/2	54.883	A02	9	sp|P25789|PSA4_HUMAN
388	21199	ALVQDLAKA	ALVQDLAKA/2	54.637	A02	9	sp|P14635|CCNB1_HUMAN
364	19399	ALVVQVAEA	ALVVQVAEA/2	53.294	A02	9	sp|P07686|HEXB_HUMAN
256	11078	SISGTVISLL	SISGTVISLL/2	43.273	A02	10	reverse_sp|Q9UGF7|O12D3_HUMAN
519	22413	MLELKLEEI	M[147]LELKLEEI/2	43.185	A02	9	reverse_sp|Q8WYK2|JDP2_HUMAN
246	10525	ALNEEAGRLLL	ALNEEAGRLLL/2	42.785	A02	11	sp|Q16763|UBE2S_HUMAN
535	22171	IQVTKVTQV	IQVTKVTQV/2	41.441	A02	9	sp|P48444|COPD_HUMAN
71	2874	RLLDVDNRVVL	RLLDVDNRVVL/3	40.479	A02	11	sp|P00403|COX2_HUMAN
56	2229	RLIDLPGTEL	RLIDLPGTEL/2	39.804	A02	10	sp|Q14CB8|RHG19_HUMAN
237	9403	GVLPNIQAV	GVLPNIQAV/2	39.675	A02	9	sp|Q96QV6|H2A1A_HUMAN
414	16046	VTDAYQAVAV	VTDAYQAVAV/2	38.758	A02	10	reverse_sp|P12111|CO6A3_HUMAN
531	19600	LLPPPPCPA	LLPPPPCPA/2	36.911	A02	9	sp|Q9BTY2|FUCO2_HUMAN
613	20869	NQFPGFKEV	NQFPGFKEV/2	34.044	A02	9	sp|P08579|RU2B_HUMAN
629	21295	KLPPPPPQA	KLPPPPPQA/2	33.855	A02	9	sp|O60341|KDM1A_HUMAN
150	5045	ALSKEGIVAL	ALSKEGIVAL/2	33.633	A02	10	sp|P40227|TCPZ_HUMAN
111	3680	VMAPRALL	VMAPRALL/2	33.153	A02	8	sp|P10321|1C07_HUMAN
80	2634	AVANIVNSV	AVANIVNSV/2	32.925	A02	9	sp|Q9BRQ8|AIFM2_HUMAN
232	7236	ALRDVSEEL	ALRDVSEEL/2	31.19	A02	9	sp|P40222|TXLNA_HUMAN
196	6062	KVLDLRINL	KVLDLRINL/2	30.929	A02	9	sp|Q709C8|VP13C_HUMAN
46	1395	SLAEPRVSV	SLAEPRVSV/2	30.326	A02	9	sp|P49327|FAS_HUMAN
507	15298	RVPPVPPNV	RVPPVPPNV/2	30.174	A02	9	sp|Q9Y483|MTF2_HUMAN
30	889	RLLPPGAVVAV	RLLPPGAVVAV/2	29.633	A02	11	sp|Q7Z7A3|CTU1_HUMAN
821	23382	KLFDDKLQNC	KLFDDKLQNC/2	28.48	A02	10	sp|Q96SU4|OSBL9_HUMAN
553	12217	RLPGPLGTV	RLPGPLGTV/2	22.092	A02	9	sp|Q53GL7|PAR10_HUMAN
943	19939	LMEHIHKL	LM[147]EHIHKL/2	21.144	A02	8	sp|P84098|RL19_HUMAN
1049	21496	ALGTDAEGQKV	ALGTDAEGQKV/2	20.492	A02	11	sp|O00186|STXB3_HUMAN
16	316	RLYDPASGTISL	RLYDPASGTISL/2	19.75	A02	12	sp|Q9NRK6|ABCBA_HUMAN
207	3974	YVIDPIKGLKL	YVIDPIKGLKL/3	19.198	A02	11	sp|Q15149|PLEC_HUMAN
83	1436	FIWKSGGDLTL	FIWKSGGDLTL/2	17.301	A02	11	sp|Q8TAF3|WDR48_HUMAN
1050	17646	LLEVPVML	LLEVPVM[147]L/2	16.806	A02	8	sp|Q96AB3|ISOC2_HUMAN
1352	22044	AQYEHDLEVA	AQYEHDLEVA/2	16.305	A02	10	sp|P62826|RAN_HUMAN
994	15490	LIDDKGTIKL	LIDDKGTIKL/2	15.584	A02	10	sp|P06493|CDK1_HUMAN
222	3316	AAAPVVPAV	AAAPVVPAV/2	14.937	A02	9	sp|O95271|TNKS1_HUMAN
1886	19987	GTQQVILVQV	GTQQVILVQV/2	10.598	A02	10	sp|Q9Y2H6|FND3A_HUMAN
1946	20442	GLADKVYF	GLADKVYF/2	10.505	A02	8	sp|P27708|PYR1_HUMAN
1854	18941	NVIERLQEA	NVIERLQEA/2	10.216	A02	9	sp|Q9UBK9|UXT_HUMAN
25	235	MVAPAVASV	M[147]VAPAVASV/2	9.4	A02	9	sp|P05412|JUN_HUMAN
2125	19045	RQPDSGISSI	RQPDSGISSI/2	8.962	A02	10	sp|P04843|RPN1_HUMAN
1553	13397	KVVLTQANKLGV	KVVLTQANKLGV/2	8.627	A02	12	sp|O94979|SC31A_HUMAN
1675	13297	RLSEFIPAVF	RLSEFIPAVF/2	7.939	A02	10	sp|Q12768|STRUM_HUMAN
2253	15204	NIRDFLVEI	NIRDFLVEI/2	6.748	A02	9	sp|Q96JI7|SPTCS_HUMAN
3845	21693	NTCPYVHNI	NTCPYVHNI/2	5.642	A02	9	sp|Q9Y2Y1|RPC10_HUMAN
3354	18429	YGLPVVVKL	YGLPVVVKL/2	5.495	A02	9	sp|P35222|CTNB1_HUMAN
3252	17589	TIAEVGKWLQA	TIAEVGKWLQA/2	5.409	A02	11	sp|P35573|GDE_HUMAN
1276	6298	VVIRGNSIIML	VVIRGNSIIM[147]L/2	4.936	A02	11	sp|P62308|RUXG_HUMAN
4846	23837	KLPSETIFVGC	KLPSETIFVGC/2	4.919	A02	11	sp|P57678|GEMI4_HUMAN
4698	21562	VQSMDVAAFNKI	VQSM[147]DVAAFNKI/2	4.59	A02	12	sp|P24534|EF1B_HUMAN
5129	22483	SLYDQAEKLVS	SLYDQAEKLVS/2	4.384	A02	11	sp|O43242|PSMD3_HUMAN
4225	18505	FLILPGYIDF	FLILPGYIDF/2	4.38	A02	10	sp|P12268|IMDH2_HUMAN
219	953	YAYDGKDYLAL	YAYDGKDYLAL/2	4.352	A02	11	sp|P17693|HLAG_HUMAN
1988	8362	MAGLFAFVPI	MAGLFAFVPI/2	4.206	A02	10	reverse_sp|Q14703|MBTP1_HUMAN
226	927	KVAPAPAVV	KVAPAPAVV/2	4.102	A02	9	sp|P62424|RL7A_HUMAN
4493	15780	FIVPLTDLRIPS	FIVPLTDLRIPS/2	3.512	A02	12	sp|P04114|APOB_HUMAN
2676	9151	QVMYRHLI	QVM[147]YRHLI/2	3.42	A02	8	reverse_sp|Q9NX05|F120C_HUMAN
7369	24065	LSLENLEKI	LSLENLEKI/2	3.266	A02	9	sp|Q9Y2H2|SAC2_HUMAN
7100	22350	VLDELKNMKC	VLDELKNM[147]KC/3	3.148	A02	10	sp|Q7L576|CYFP1_HUMAN
3974	12342	MIRAILEII	MIRAILEII/2	3.106	A02	9	sp|O75417|DPOLQ_HUMAN
28179	6	RPRPGTGLGRVM	RPRPGTGLGRVM/3	4696.5	B07	12	sp|Q9BVK6|TMED9_HUMAN
30689	7	SPRPPLGSSL	SPRPPLGSSL/2	4384.14	B07	10	sp|Q8NHM5|KDM2B_HUMAN
29599	7	TPRPGSAESAL	TPRPGSAESAL/2	4228.43	B07	11	sp|Q9ULC8|ZDHC8_HUMAN
29484	7	APRPPPKPM	APRPPPKPM[147]/2	4212	B07	9	sp|P62854|RS26_HUMAN;sp|Q5JNZ5|RS26L_HUMAN
29371	7	APRPPFSTM	APRPPFSTM[147]/2	4195.86	B07	9	sp|P11940|PABP1_HUMAN
29275	7	SPRLSSSL	SPRLSSSL/2	4182.14	B07	8	sp|O14974|MYPT1_HUMAN
24784	6	HPMKPHRLAL	HPM[147]KPHRLAL/3	4130.67	B07	10	sp|O15379|HDAC3_HUMAN
28538	7	APRFGGSRAGPL	APRFGGSRAGPL/3	4076.86	B07	12	sp|P17844|DDX5_HUMAN
28256	7	SPRWGGIM	SPRWGGIM[147]/2	4036.57	B07	8	sp|Q96S52|PIGS_HUMAN
28132	7	TPRPMTAEL	TPRPM[147]TAEL/2	4018.86	B07	9	sp|P78357|CNTP1_HUMAN
27949	7	SPRLMSNAL	SPRLM[147]SNAL/2	3992.71	B07	9	sp|Q9NZJ7|MTCH1_HUMAN
31669	8	SPRGPGQGSGHL	SPRGPGQGSGHL/3	3958.62	B07	12	sp|Q15027|ACAP1_HUMAN
27616	7	RPRSKLPRAL	RPRSKLPRAL/3	3945.14	B07	10	sp|Q9Y5Q9|TF3C3_HUMAN
31423	8	SPRQPSGGQI	SPRQPSGGQI/2	3927.88	B07	10	sp|O14497|ARI1A_HUMAN
31020	8	SPRGPGCSL	SPRGPGCSL/2	3877.5	B07	9	sp|Q9NQT4|EXOS5_HUMAN
27124	7	APRWGNPRAL	APRWGNPRAL/3	3874.86	B07	10	sp|P00973|OAS1_HUMAN
30573	8	VPRPPQTSL	VPRPPQTSL/2	3821.62	B07	9	sp|O95785|WIZ_HUMAN
30395	8	SPRVPNSSV	SPRVPNSSV/2	3799.38	B07	9	sp|Q9NR09|BIRC6_HUMAN
30173	8	APRVKEGPL	APRVKEGPL/2	3771.62	B07	9	sp|Q99607|ELF4_HUMAN
30151	8	SPRLPVGGFRSL	SPRLPVGGFRSL/3	3768.88	B07	12	sp|Q14669|TRIPC_HUMAN
26322	7	IPRTPLSPSPM	IPRTPLSPSPM[147]/2	3760.29	B07	11	sp|Q69YQ0|CYTSA_HUMAN
30010	8	RPRNPAGRTGL	RPRNPAGRTGL/3	3751.25	B07	11	sp|Q9BW91|NUDT9_HUMAN
29928	8	SPEETRAAL	SPEETRAAL/2	3741	B07	9	sp|P78549|NTH_HUMAN
29733	8	VPRKPVKHTAM	VPRKPVKHTAM[147]/3	3716.62	B07	11	sp|P21333|FLNA_HUMAN
29713	8	VPRVPTHTL	VPRVPTHTL/2	3714.12	B07	9	sp|Q8IWZ3|ANKH1_HUMAN
29325	8	SPRKPVAKWHSL	SPRKPVAKWHSL/3	3665.62	B07	12	sp|Q9BT88|SYT11_HUMAN
32980	9	EPRPPHGEL	EPRPPHGEL/2	3664.44	B07	9	sp|P04818|TYSY_HUMAN
29308	8	RPRPSGEEVL	RPRPSGEEVL/2	3663.5	B07	10	sp|P33992|MCM5_HUMAN
29261	8	KPRKPAGAA	KPRKPAGAA/2	3657.62	B07	9	sp|P16402|H13_HUMAN
25585	7	RPYQPLGAL	RPYQPLGAL/2	3655	B07	9	sp|Q9Y5Y2|NUBP2_HUMAN
29185	8	HPRSPTPTL	HPRSPTPTL/2	3648.12	B07	9	sp|Q96HE9|PRR11_HUMAN
29182	8	APRPAGSYL	APRPAGSYL/2	3647.75	B07	9	sp|P33076|C2TA_HUMAN
28864	8	SPRSPSTTYL	SPRSPSTTYL/2	3608	B07	10	sp|Q13111|CAF1A_HUMAN
28839	8	SPRSSLNNSL	SPRSSLNNSL/2	3604.88	B07	10	sp|Q9UPW0|FOXJ3_HUMAN
28524	8	APRPPVSAA	APRPPVSAA/2	3565.5	B07	9	sp|Q8TF74|WIPF2_HUMAN
28387	8	SPGSPRPAL	SPGSPRPAL/2	3548.38	B07	9	sp|Q9H211|CDT1_HUMAN
28286	8	RPRPDEERPL	RPRPDEERPL/2	3535.75	B07	10	sp|Q86YV0|RASL3_HUMAN
28231	8	HPRSPNVLSVAL	HPRSPNVLSVAL/2	3528.88	B07	12	sp|Q16665|HIF1A_HUMAN
24642	7	APLQHRHVL	APLQHRHVL/2	3520.29	B07	9	sp|Q504T8|MIDN_HUMAN
28129	8	SPNQARAQAAL	SPNQARAQAAL/2	3516.12	B07	11	sp|P26599|PTBP1_HUMAN
27967	8	SPRGGTPGSGAA	SPRGGTPGSGAA/2	3495.88	B07	12	sp|O14497|ARI1A_HUMAN
27859	8	RPRPPITLL	RPRPPITLL/2	3482.38	B07	9	sp|Q9H0E3|SP130_HUMAN
27691	8	NPRDPSSSSSM	NPRDPSSSSSM[147]/2	3461.38	B07	11	sp|Q9Y6N7|ROBO1_HUMAN
27588	8	SPSSPGSSL	SPSSPGSSL/2	3448.5	B07	9	sp|O95271|TNKS1_HUMAN
27558	8	RPRDPTPSF	RPRDPTPSF/2	3444.75	B07	9	sp|Q14137|BOP1_HUMAN
30903	9	SPRISPATTL	SPRISPATTL/2	3433.67	B07	10	sp|Q8IVW6|ARI3B_HUMAN
27467	8	APRPYASSL	APRPYASSL/2	3433.38	B07	9	sp|Q96EP0|RNF31_HUMAN
27437	8	RPRETRVIAVL	RPRETRVIAVL/3	3429.62	B07	11	sp|P33076|C2TA_HUMAN
27249	8	GPRGSGPPM	GPRGSGPPM[147]/2	3406.12	B07	9	sp|P48634|PRC2A_HUMAN
27054	8	APRTNGVAM	APRTNGVAM[147]/2	3381.75	B07	9	sp|Q92567|F168A_HUMAN
26949	8	APRTVALTAL	APRTVALTAL/2	3368.62	B07	10	sp|P04440|DPB1_HUMAN
26946	8	MPRGPTLGHVSL	M[147]PRGPTLGHVSL/3	3368.25	B07	12	sp|Q96TA2|YMEL1_HUMAN
26918	8	LPRPPMLLAL	LPRPPM[147]LLAL/2	3364.75	B07	10	sp|P07686|HEXB_HUMAN
26865	8	RPKSTSTSSM	RPKSTSTSSM/2	3358.12	B07	10	sp|P27816|MAP4_HUMAN
30098	9	SPRKPIDSL	SPRKPIDSL/2	3344.22	B07	9	sp|Q9UQ35|SRRM2_HUMAN
29865	9	SPRITFPSLQAL	SPRITFPSLQAL/2	3318.33	B07	12	sp|P51451|BLK_HUMAN
26539	8	RPSGPGGEM	RPSGPGGEM[147]/2	3317.38	B07	9	sp|P14373|TRI27_HUMAN
23161	7	SPLRSSSAL	SPLRSSSAL/2	3308.71	B07	9	sp|P59923|ZN445_HUMAN
26390	8	RPSGPSKAL	RPSGPSKAL/2	3298.75	B07	9	sp|P48444|COPD_HUMAN
29682	9	HPRIASGLGL	HPRIASGLGL/2	3298	B07	10	sp|O14880|MGST3_HUMAN
29552	9	APRQPGLM	APRQPGLM[147]/2	3283.56	B07	8	sp|Q9Y6H1|CHCH2_HUMAN
22969	7	SPGWVRLAL	SPGWVRLAL/2	3281.29	B07	9	sp|Q9BQB6|VKOR1_HUMAN
26207	8	KPRPPLHLL	KPRPPLHLL/2	3275.88	B07	9	sp|Q8N4T4|ARG39_HUMAN
26149	8	HPINPRVAL	HPINPRVAL/2	3268.62	B07	9	sp|Q9P0U4|CXXC1_HUMAN
29388	9	APRQPGLMAQM	APRQPGLM[147]AQM/2	3265.33	B07	11	sp|Q9Y6H1|CHCH2_HUMAN
26098	8	APREGQGSSAV	APREGQGSSAV/2	3262.25	B07	11	sp|Q16566|KCC4_HUMAN
26013	8	IPRGVNVSAL	IPRGVNVSAL/2	3251.62	B07	10	sp|P38606|VATA_HUMAN
29207	9	KPEEQRQAL	KPEEQRQAL/2	3245.22	B07	9	sp|Q15149|PLEC_HUMAN
29121	9	KPRVPPATAF	KPRVPPATAF/2	3235.67	B07	10	sp|Q99707|METH_HUMAN
25644	8	RPKEGTSTL	RPKEGTSTL/2	3205.5	B07	9	sp|Q9Y5W9|SNX11_HUMAN
28794	9	APRKKSPDL	APRKKSPDL/2	3199.33	B07	9	sp|Q9BT25|HAUS8_HUMAN
25528	8	SPAPTHNSL	SPAPTHNSL/2	3191	B07	9	sp|P49327|FAS_HUMAN
28570	9	TPRGGVGSVAL	TPRGGVGSVAL/2	3174.44	B07	11	sp|Q9P2G9|KLHL8_HUMAN
25356	8	RPRHQGVMVGM	RPRHQGVM[147]VGM[147]/3	3169.5	B07	11	sp|P62736|ACTA_HUMAN
28523	9	APRAGEQGEAM	APRAGEQGEAM[147]/2	3169.22	B07	11	sp|Q5JSZ5|PRC2B_HUMAN
28304	9	HPKGGSTSAL	HPKGGSTSAL/2	3144.89	B07	10	sp|Q9NQG7|HPS4_HUMAN
28250	9	FPRSPGQPSSL	FPRSPGQPSSL/2	3138.89	B07	11	sp|Q5T011|SZT2_HUMAN
28180	9	SPQSPGDAL	SPQSPGDAL/2	3131.11	B07	9	sp|Q96KR1|ZFR_HUMAN
28174	9	APREALAQTVL	APREALAQTVL/2	3130.44	B07	11	sp|Q99829|CPNE1_HUMAN
24983	8	KPQKGGPL	KPQKGGPL/2	3122.88	B07	8	sp|Q9UNY4|TTF2_HUMAN
28083	9	APKPGGLSL	APKPGGLSL/2	3120.33	B07	9	sp|Q8NCH0|CHSTE_HUMAN
28082	9	VPRPVLRALSF	VPRPVLRALSF/3	3120.22	B07	11	sp|Q9GZR7|DDX24_HUMAN
28052	9	SPQKTMSVL	SPQKTM[147]SVL/2	3116.89	B07	9	sp|Q12888|TP53B_HUMAN
24913	8	APAKAQSAL	APAKAQSAL/2	3114.12	B07	9	sp|Q5VWN6|F208B_HUMAN
27948	9	VPNQKRLTL	VPNQKRLTL/2	3105.33	B07	9	sp|O60488|ACSL4_HUMAN
27827	9	APRAASTESL	APRAASTESL/2	3091.89	B07	10	sp|O43292|GPAA1_HUMAN
27800	9	VPRPPSLLATL	VPRPPSLLATL/2	3088.89	B07	11	sp|Q14689|DIP2A_HUMAN
27702	9	APAPSKGQTL	APAPSKGQTL/2	3078	B07	10	sp|Q6ZRI6|CO039_HUMAN
30735	10	LPRQPPMSL	LPRQPPM[147]SL/2	3073.5	B07	9	sp|Q13045|FLII_HUMAN
27588	9	RPAPPMKGQL	RPAPPM[147]KGQL/3	3065.33	B07	10	sp|Q86TS9|RM52_HUMAN
24440	8	SPRWGGIMV	SPRWGGIM[147]V/2	3055	B07	9	sp|Q96S52|PIGS_HUMAN
24379	8	GPAERSGAL	GPAERSGAL/2	3047.38	B07	9	sp|O96018|APBA3_HUMAN
30459	10	TPRPPGPGL	TPRPPGPGL/2	3045.9	B07	9	sp|Q8NEZ4|KMT2C_HUMAN
30439	10	SPRAQATSRL	SPRAQATSRL/3	3043.9	B07	10	sp|Q9NQX3|GEPH_HUMAN
30374	10	APRVPVQAL	APRVPVQAL/2	3037.4	B07	9	sp|O75179|ANR17_HUMAN
27294	9	SPRAPFYRPL	SPRAPFYRPL/3	3032.67	B07	10	sp|A6NED2|RCCD1_HUMAN
27285	9	RPENYREAL	RPENYREAL/3	3031.67	B07	9	sp|P06276|CHLE_HUMAN
24222	8	RPYPSPGAVL	RPYPSPGAVL/2	3027.75	B07	10	sp|O60828|PQBP1_HUMAN
27160	9	APRPVDEPAM	APRPVDEPAM[147]/2	3017.78	B07	10	sp|Q9Y2X0|MED16_HUMAN
27007	9	RPRGLALVL	RPRGLALVL/2	3000.78	B07	9	sp|P42575|CASP2_HUMAN
29750	10	SPRLPVGGF	SPRLPVGGF/2	2975	B07	9	sp|Q14669|TRIPC_HUMAN
23724	8	RPHYSLRTL	RPHYSLRTL/3	2965.5	B07	9	sp|Q9NU22|MDN1_HUMAN
26625	9	RPKTYHTSL	RPKTYHTSL/3	2958.33	B07	9	sp|Q66K64|DCA15_HUMAN
29473	10	APTKRKSL	APTKRKSL/2	2947.3	B07	8	sp|P46013|KI67_HUMAN
29416	10	SPRLSQTFL	SPRLSQTFL/2	2941.6	B07	9	sp|Q92608|DOCK2_HUMAN
23507	8	SPMADRSMM	SPM[147]ADRSM[147]M[147]/2	2938.38	B07	9	sp|P18583|SON_HUMAN
26432	9	SPTSVRQMAL	SPTSVRQM[147]AL/2	2936.89	B07	10	sp|Q96NB2|SFXN2_HUMAN
29331	10	IPRLPERMTTL	IPRLPERM[147]TTL/3	2933.1	B07	11	sp|O95466|FMNL_HUMAN
26282	9	SPNGHRPQL	SPNGHRPQL/2	2920.22	B07	9	sp|Q5SRD0|FA21D_HUMAN
23186	8	SPLSAARAAL	SPLSAARAAL/2	2898.25	B07	10	sp|Q8N5I4|DHRSX_HUMAN
26010	9	RPTPKNSL	RPTPKNSL/2	2890	B07	8	sp|O95168|NDUB4_HUMAN
25801	9	RPRKAFLLL	RPRKAFLLL/3	2866.78	B07	9	sp|P13667|PDIA4_HUMAN
25722	9	MPRKITEVL	MPRKITEVL/2	2858	B07	9	sp|Q9BX10|GTPB2_HUMAN
22833	8	RPSTPHTITL	RPSTPHTITL/2	2854.12	B07	10	sp|Q12770|SCAP_HUMAN
25628	9	RPKENSMSTL	RPKENSM[147]STL/2	2847.56	B07	10	sp|Q9H992|MARH7_HUMAN
28427	10	SPELRSTAM	SPELRSTAM[147]/2	2842.7	B07	9	sp|P42345|MTOR_HUMAN
28245	10	HPRTSITVVL	HPRTSITVVL/2	2824.5	B07	10	sp|Q9NQT4|EXOS5_HUMAN
22590	8	YPRLGGFVM	YPRLGGFVM[147]/2	2823.75	B07	9	sp|Q92797|SYMPK_HUMAN
22531	8	RPLGAGEAL	RPLGAGEAL/2	2816.38	B07	9	sp|Q96SI9|STRBP_HUMAN
25331	9	RPHSVIGGSL	RPHSVIGGSL/2	2814.56	B07	10	sp|Q00537|CDK17_HUMAN
22495	8	VPASKRPPL	VPASKRPPL/2	2811.88	B07	9	sp|O60682|MUSC_HUMAN
22478	8	KPYQGVGSSSM	KPYQGVGSSSM[147]/2	2809.75	B07	11	sp|Q12907|LMAN2_HUMAN
22471	8	TPAPPTHAL	TPAPPTHAL/2	2808.88	B07	9	sp|Q5SXM2|SNPC4_HUMAN
25271	9	SPMAERSMM	SPMAERSM[147]M[147]/2	2807.89	B07	9	sp|P18583|SON_HUMAN
22425	8	YPAERKQAL	YPAERKQAL/2	2803.12	B07	9	sp|O43592|XPOT_HUMAN
25158	9	APSRNGMVL	APSRNGM[147]VL/2	2795.33	B07	9	sp|P26373|RL13_HUMAN
25086	9	RPANHRQLTF	RPANHRQLTF/3	2787.33	B07	10	sp|Q9UNM6|PSD13_HUMAN
25075	9	RPRKAFLL	RPRKAFLL/2	2786.11	B07	8	sp|P13667|PDIA4_HUMAN
27748	10	LPNQARAQAAL	LPNQARAQAAL/2	2774.8	B07	11	sp|O95758|PTBP3_HUMAN
30352	11	TPRPTAAEL	TPRPTAAEL/2	2759.27	B07	9	sp|Q9BSJ8|ESYT1_HUMAN
24788	9	SPAFSTRVL	SPAFSTRVL/2	2754.22	B07	9	sp|Q7KZF4|SND1_HUMAN
27381	10	HPHYSREEL	HPHYSREEL/3	2738.1	B07	9	sp|Q9NYK6|EURL_HUMAN
27345	10	KPRSPVVEL	KPRSPVVEL/2	2734.5	B07	9	sp|P25098|ARBK1_HUMAN
27323	10	RPKPPSATSI	RPKPPSATSI/2	2732.3	B07	10	sp|Q9UMS4|PRP19_HUMAN
27295	10	RPREAEVRFL	RPREAEVRFL/3	2729.5	B07	10	sp|Q13438|OS9_HUMAN
29996	11	VPRSQGTEAEL	VPRSQGTEAEL/2	2726.91	B07	11	sp|Q8NAG6|ANKL1_HUMAN
24514	9	APGRHSSSL	APGRHSSSL/2	2723.78	B07	9	sp|Q6ZNJ1|NBEL2_HUMAN
27053	10	KPSVKGRAQL	KPSVKGRAQL/3	2705.3	B07	10	sp|P40227|TCPZ_HUMAN
29742	11	RPRNLGELCQRL	RPRNLGELCQRL/3	2703.82	B07	12	sp|Q9UI14|PRAF1_HUMAN
26978	10	RPREAPDTYL	RPREAPDTYL/3	2697.8	B07	10	sp|Q15653|IKBB_HUMAN
29625	11	NPRQPLPASGL	NPRQPLPASGL/2	2693.18	B07	11	sp|Q96L08|SUSD3_HUMAN
24060	9	RPVAPSGTAL	RPVAPSGTAL/2	2673.33	B07	10	sp|P35658|NU214_HUMAN
24005	9	RPAQVSQPF	RPAQVSQPF/2	2667.22	B07	9	sp|Q9Y520|PRC2C_HUMAN
23978	9	GPLPPHLAL	GPLPPHLAL/2	2664.22	B07	9	sp|Q08211|DHX9_HUMAN
29275	11	LPRGSSPSVL	LPRGSSPSVL/2	2661.36	B07	10	sp|Q9GZN2|TGIF2_HUMAN
23849	9	RPAPPPEAL	RPAPPPEAL/2	2649.89	B07	9	sp|Q9NQG6|MID51_HUMAN
26457	10	RPRHQGVMV	RPRHQGVMV/2	2645.7	B07	9	sp|P62736|ACTA_HUMAN
23791	9	RPRDVSSVEL	RPRDVSSVEL/2	2643.44	B07	10	sp|P11277|SPTB1_HUMAN
26430	10	GPAPKGSSL	GPAPKGSSL/2	2643	B07	9	sp|P35408|PE2R4_HUMAN
28962	11	IPRGPASQF	IPRGPASQF/2	2632.91	B07	9	sp|P49750|YLPM1_HUMAN
28955	11	SPTGSGKSL	SPTGSGKSL/2	2632.27	B07	9	sp|Q9BX63|FANCJ_HUMAN
28902	11	APRAPPGPAGL	APRAPPGPAGL/2	2627.45	B07	11	sp|Q9NRL3|STRN4_HUMAN
28880	11	APRIPVTL	APRIPVTL/2	2625.45	B07	8	sp|O95372|LYPA2_HUMAN
23623	9	RPNNAYTAM	RPNNAYTAM[147]/2	2624.78	B07	9	sp|Q9Y5A9|YTHD2_HUMAN
26202	10	APHARNGLSL	APHARNGLSL/2	2620.2	B07	10	sp|Q13422|IKZF1_HUMAN
26160	10	KPHPPPSGL	KPHPPPSGL/2	2616	B07	9	sp|Q9Y5Z7|HCFC2_HUMAN
23531	9	FPEPSRPPL	FPEPSRPPL/2	2614.56	B07	9	sp|Q2V2M9|FHOD3_HUMAN
28682	11	APRLPITGL	APRLPITGL/2	2607.45	B07	9	sp|Q8TF50|ZN526_HUMAN
23423	9	TPMHPPSSL	TPM[147]HPPSSL/2	2602.56	B07	9	sp|P23771|GATA3_HUMAN
28616	11	APREGQGSSA	APREGQGSSA/2	2601.45	B07	10	sp|Q16566|KCC4_HUMAN
25994	10	SPGQRSISL	SPGQRSISL/2	2599.4	B07	9	sp|P00519|ABL1_HUMAN
25987	10	RPRGFAYVQF	RPRGFAYVQF/3	2598.7	B07	10	sp|O75494|SRS10_HUMAN
23384	9	LPAPKGPAL	LPAPKGPAL/2	2598.22	B07	9	sp|Q92733|PRCC_HUMAN
28579	11	GPRPITQSEL	GPRPITQSEL/2	2598.09	B07	10	sp|Q96S82|UBL7_HUMAN
23377	9	SPSDPSSSL	SPSDPSSSL/2	2597.44	B07	9	sp|Q9BZ67|FRMD8_HUMAN
23325	9	KPVSLGQAL	KPVSLGQAL/2	2591.67	B07	9	sp|O60341|KDM1A_HUMAN
28444	11	VPRVLGSSV	VPRVLGSSV/2	2585.82	B07	9	sp|Q07021|C1QBP_HUMAN
25780	10	KPVKPHSSF	KPVKPHSSF/2	2578	B07	9	sp|Q9Y520|PRC2C_HUMAN
20570	8	SVRPGGAAM	SVRPGGAAM[147]/2	2571.25	B07	9	sp|O15085|ARHGB_HUMAN
28255	11	APTVRSKAL	APTVRSKAL/2	2568.64	B07	9	sp|P42695|CNDD3_HUMAN
25605	10	RPKSGGSGHAV	RPKSGGSGHAV/2	2560.5	B07	11	sp|P46013|KI67_HUMAN
22868	9	RPHYGSVL	RPHYGSVL/2	2540.89	B07	8	sp|P46940|IQGA1_HUMAN
25408	10	SPAGPGRAASL	SPAGPGRAASL/2	2540.8	B07	11	sp|Q9NWT8|AKIP_HUMAN
30419	12	APRIESKSM	APRIESKSM[147]/2	2534.92	B07	9	sp|O60749|SNX2_HUMAN
22777	9	RPTGSVSSTL	RPTGSVSSTL/2	2530.78	B07	10	sp|Q86UK7|ZN598_HUMAN
30280	12	TPKPPSQAL	TPKPPSQAL/2	2523.33	B07	9	sp|Q9NQ66|PLCB1_HUMAN
27746	11	APRKVLGSSTSA	APRKVLGSSTSA/3	2522.36	B07	12	sp|Q15004|PAF15_HUMAN
27733	11	LPRAVNTQAL	LPRAVNTQAL/2	2521.18	B07	10	sp|O60749|SNX2_HUMAN
27707	11	RPKPSASEVL	RPKPSASEVL/2	2518.82	B07	10	sp|A6NNL5|CO061_HUMAN
22654	9	RPYAAGGKKLAL	RPYAAGGKKLAL/3	2517.11	B07	12	sp|Q9H7U1|CCSE2_HUMAN
22605	9	IPSNSSSAL	IPSNSSSAL/2	2511.67	B07	9	reverse_sp|Q9BXB4|OSB11_HUMAN
25109	10	APLPRPGAVL	APLPRPGAVL/2	2510.9	B07	10	sp|O75638|CTAG2_HUMAN
24874	10	RPTTGNTL	RPTTGNTL/2	2487.4	B07	8	sp|Q9BPX6|MICU1_HUMAN
29751	12	TPRGGVGSV	TPRGGVGSV/2	2479.25	B07	9	sp|Q9P2G9|KLHL8_HUMAN
27256	11	SPRDITTIKL	SPRDITTIKL/3	2477.82	B07	10	sp|P56589|PEX3_HUMAN
24738	10	RPNGTKVAVL	RPNGTKVAVL/2	2473.8	B07	10	sp|Q8NHH9|ATLA2_HUMAN
24734	10	APSPRPLSL	APSPRPLSL/2	2473.4	B07	9	sp|Q6NUT3|MFS12_HUMAN
29602	12	SPTGTGKSL	SPTGTGKSL/2	2466.83	B07	9	sp|A8MPP1|D11L8_HUMAN
27107	11	KPAPPTKAT	KPAPPTKAT/2	2464.27	B07	9	sp|Q14008|CKAP5_HUMAN
27066	11	VPPPPHRPL	VPPPPHRPL/2	2460.55	B07	9	sp|Q9Y520|PRC2C_HUMAN
26965	11	APAGTRSQV	APAGTRSQV/2	2451.36	B07	9	sp|Q13428|TCOF_HUMAN
26909	11	IPRVPSLSV	IPRVPSLSV/2	2446.27	B07	9	sp|P78345|RPP38_HUMAN
29346	12	RPKKPGQSF	RPKKPGQSF/2	2445.5	B07	9	sp|O15042|SR140_HUMAN
29320	12	HPRVGDLIL	HPRVGDLIL/2	2443.33	B07	9	sp|Q53GS7|GLE1_HUMAN
29272	12	HPRVPSLTTV	HPRVPSLTTV/2	2439.33	B07	10	sp|Q9BW19|KIFC1_HUMAN
24391	10	SPAKNPSSL	SPAKNPSSL/2	2439.1	B07	9	sp|Q9GZR7|DDX24_HUMAN
21777	9	KPSTAHHRPL	KPSTAHHRPL/3	2419.67	B07	10	sp|Q08AE8|SPIR1_HUMAN
28992	12	TPRGGVGIATVM	TPRGGVGIATVM[147]/2	2416	B07	12	sp|Q9P2G9|KLHL8_HUMAN
24054	10	APRDAYWIAM	APRDAYWIAM[147]/2	2405.4	B07	10	sp|O75794|CD123_HUMAN
28863	12	LPRAVGTQTL	LPRAVGTQTL/2	2405.25	B07	10	sp|Q13596|SNX1_HUMAN
24000	10	SPISSNSHRSL	SPISSNSHRSL/2	2400	B07	11	sp|Q9NR09|BIRC6_HUMAN
26354	11	KPRKLVNTI	KPRKLVNTI/2	2395.82	B07	9	sp|Q92900|RENT1_HUMAN
28740	12	VPRQPTVTSV	VPRQPTVTSV/2	2395	B07	10	sp|Q96HC4|PDLI5_HUMAN
23814	10	APIIRVGGAL	APIIRVGGAL/2	2381.4	B07	10	sp|O60566|BUB1B_HUMAN
23802	10	KPKSYSSSL	KPKSYSSSL/2	2380.2	B07	9	sp|Q9H0H0|INT2_HUMAN
30872	13	VPRSPFKVKVL	VPRSPFKVKVL/3	2374.77	B07	11	sp|P21333|FLNA_HUMAN
28404	12	SPKPLVTPGSTL	SPKPLVTPGSTL/2	2367	B07	12	sp|Q9GZN2|TGIF2_HUMAN
23636	10	RPVPPPPSL	RPVPPPPSL/2	2363.6	B07	9	sp|P13051|UNG_HUMAN
23619	10	RPSGPGPEL	RPSGPGPEL/2	2361.9	B07	9	sp|P51531|SMCA2_HUMAN
25960	11	VPSKPPMSL	VPSKPPMSL/2	2360	B07	9	sp|Q6AI12|ANR40_HUMAN
23600	10	KPHNPGFGM	KPHNPGFGM[147]/2	2360	B07	9	sp|Q12906|ILF3_HUMAN
25895	11	NPRQAAYEM	NPRQAAYEM[147]/2	2354.09	B07	9	sp|Q9H0D6|XRN2_HUMAN
25754	11	SPAGLKAVL	SPAGLKAVL/2	2341.27	B07	9	sp|Q6P9B9|INT5_HUMAN
28095	12	LPRTAISEL	LPRTAISEL/2	2341.25	B07	9	sp|Q9NRC8|SIR7_HUMAN
23339	10	KPRDVSSVEL	KPRDVSSVEL/2	2333.9	B07	10	sp|Q01082|SPTB2_HUMAN
27963	12	APRLQSEVAEL	APRLQSEVAEL/2	2330.25	B07	11	sp|P53990|IST1_HUMAN
27880	12	HPRSPNVLSV	HPRSPNVLSV/2	2323.33	B07	10	sp|Q16665|HIF1A_HUMAN
27765	12	SPQEARNML	SPQEARNML/2	2313.75	B07	9	sp|P33240|CSTF2_HUMAN
23133	10	RPSGLHGDVSL	RPSGLHGDVSL/3	2313.3	B07	11	sp|Q9H6E5|STPAP_HUMAN
27754	12	APREPPPVEL	APREPPPVEL/2	2312.83	B07	10	sp|Q13105|ZBT17_HUMAN
27664	12	GPRLVSNHSL	GPRLVSNHSL/3	2305.33	B07	10	sp|P21333|FLNA_HUMAN
20736	9	RPYGSDKPWPSL	RPYGSDKPWPSL/3	2304	B07	12	sp|Q8N5F7|NKAP_HUMAN
20717	9	SPASRSISL	SPASRSISL/2	2301.89	B07	9	sp|P32970|CD70_HUMAN
29837	13	QPRGPDNSM	QPRGPDNSM[147]/2	2295.15	B07	9	sp|O75534|CSDE1_HUMAN
20628	9	RPSSKKTYSL	RPSSKKTYSL/3	2292	B07	10	sp|Q96Q89|KI20B_HUMAN
29699	13	NPRIPYTEL	NPRIPYTEL/2	2284.54	B07	9	sp|Q92830|KAT2A_HUMAN
25068	11	YPRQLESLIRL	YPRQLESLIRL/3	2278.91	B07	11	sp|P33991|MCM4_HUMAN
25036	11	SPSLPNISL	SPSLPNISL/2	2276	B07	9	sp|Q9UQL6|HDAC5_HUMAN
29585	13	APRQPGLMA	APRQPGLMA/2	2275.77	B07	9	sp|Q9Y6H1|CHCH2_HUMAN
25022	11	RPQLKGVVL	RPQLKGVVL/2	2274.73	B07	9	sp|O15235|RT12_HUMAN
22611	10	KPASTSGKSEL	KPASTSGKSEL/2	2261.1	B07	11	sp|O75592|MYCB2_HUMAN
17970	8	RPVPWNAL	RPVPWNAL/2	2246.25	B07	8	sp|Q05923|DUS2_HUMAN
22449	10	NPASRLTAL	NPASRLTAL/2	2244.9	B07	9	sp|P36894|BMR1A_HUMAN
26688	12	SPYPTKTQTM	SPYPTKTQTM[147]/2	2224	B07	10	sp|P04843|RPN1_HUMAN
28883	13	APKRPPSAF	APKRPPSAF/2	2221.77	B07	9	sp|B2RPK0|HGB1A_HUMAN
26581	12	RPRDALPRL	RPRDALPRL/3	2215.08	B07	9	sp|Q86Y56|HEAT2_HUMAN
30952	14	GPRLPWTRL	GPRLPWTRL/3	2210.86	B07	9	sp|Q6NUQ4|TM214_HUMAN
28729	13	VPREPPVSL	VPREPPVSL/2	2209.92	B07	9	sp|Q8TEQ8|PIGO_HUMAN
28712	13	APTGSGKTL	APTGSGKTL/2	2208.61	B07	9	sp|Q8N8A6|DDX51_HUMAN
22067	10	RPSASTQAL	RPSASTQAL/2	2206.7	B07	9	sp|Q16531|DDB1_HUMAN
24234	11	APALPGPAL	APALPGPAL/2	2203.09	B07	9	sp|O00303|EIF3F_HUMAN
26437	12	NPRDLPLMAL	NPRDLPLM[147]AL/2	2203.08	B07	10	sp|P04818|TYSY_HUMAN
28377	13	TPQMPTQAM	TPQM[147]PTQAM[147]/2	2182.85	B07	9	sp|Q8WU79|SMAP2_HUMAN
26140	12	RPRIDLIVF	RPRIDLIVF/2	2178.33	B07	9	sp|Q9NSP4|CENPM_HUMAN
19559	9	RPWLEGRHTL	RPWLEGRHTL/3	2173.22	B07	10	sp|Q9UI10|EI2BD_HUMAN
26023	12	RPRDALPRLL	RPRDALPRLL/3	2168.58	B07	10	sp|Q86Y56|HEAT2_HUMAN
23806	11	SPVKSTTSI	SPVKSTTSI/2	2164.18	B07	9	sp|Q9NQW6|ANLN_HUMAN
25948	12	GPQAVRAAL	GPQAVRAAL/2	2162.33	B07	9	sp|O95602|RPA1_HUMAN
28097	13	VPEEARPAL	VPEEARPAL/2	2161.31	B07	9	sp|Q66K64|DCA15_HUMAN
25921	12	APAGRKVGL	APAGRKVGL/2	2160.08	B07	9	sp|P62917|RL8_HUMAN
23748	11	KPHSGFHVAF	KPHSGFHVAF/3	2158.91	B07	10	sp|Q8IYU8|MICU2_HUMAN
23705	11	SPSPVLRLVL	SPSPVLRLVL/2	2155	B07	10	sp|O43432|IF4G3_HUMAN
27906	13	SPALPGLKL	SPALPGLKL/2	2146.61	B07	9	sp|O14836|TR13B_HUMAN
27863	13	TPQGFRSTL	TPQGFRSTL/2	2143.31	B07	9	sp|Q8N9N2|ASCC1_HUMAN
25667	12	APNPYRQAIMSF	APNPYRQAIM[147]SF/2	2138.92	B07	12	sp|Q7RTS9|DYM_HUMAN
17092	8	RPAPLSAEL	RPAPLSAEL/2	2136.5	B07	9	sp|P53602|MVD1_HUMAN
23460	11	APIGPHLQSM	APIGPHLQSM[147]/2	2132.73	B07	10	sp|Q14152|EIF3A_HUMAN
21276	10	RPAAPGQTPL	RPAAPGQTPL/2	2127.6	B07	10	sp|Q12796|PNRC1_HUMAN
25528	12	KPRNVVFVDM	KPRNVVFVDM[147]/2	2127.33	B07	10	sp|P34932|HSP74_HUMAN
25526	12	APRTVALTALL	APRTVALTALL/2	2127.17	B07	11	sp|P04440|DPB1_HUMAN
29697	14	GPREAFRQL	GPREAFRQL/2	2121.21	B07	9	sp|P57086|SCND1_HUMAN
21149	10	NVRPPNTAL	NVRPPNTAL/2	2114.9	B07	9	sp|Q17RS7|GEN_HUMAN
27272	13	LPRPHASIMF	LPRPHASIMF/2	2097.85	B07	10	sp|Q08211|DHX9_HUMAN
18849	9	APASRLLAL	APASRLLAL/2	2094.33	B07	9	sp|Q96S16|JMJD8_HUMAN
29206	14	LPRGSIPRSL	LPRGSIPRSL/3	2086.14	B07	10	sp|Q14566|MCM6_HUMAN
25029	12	RPPPPNSVI	RPPPPNSVI/2	2085.75	B07	9	sp|Q14186|TFDP1_HUMAN
24992	12	APGKKTSGL	APGKKTSGL/2	2082.67	B07	9	sp|Q9UBU8|MO4L1_HUMAN
27069	13	KPQPRPQTL	KPQPRPQTL/2	2082.23	B07	9	sp|Q9NR20|DYRK4_HUMAN
29124	14	APRAPAAGL	APRAPAAGL/2	2080.29	B07	9	sp|Q86YV0|RASL3_HUMAN
28946	14	SPKPPTSMF	SPKPPTSM[147]F/2	2067.57	B07	9	sp|Q99081|HTF4_HUMAN
26831	13	SPGTRPTAM	SPGTRPTAM[147]/2	2063.92	B07	9	sp|Q8WYA1|BMAL2_HUMAN
24657	12	SPAVERLISSL	SPAVERLISSL/2	2054.75	B07	11	sp|Q9BQ52|RNZ2_HUMAN
24644	12	RPAQPQEHPF	RPAQPQEHPF/3	2053.67	B07	10	sp|Q15437|SC23B_HUMAN
26628	13	KPAGPPGIL	KPAGPPGIL/2	2048.31	B07	9	sp|P35579|MYH9_HUMAN
26603	13	RPDITHQSL	RPDITHQSL/2	2046.38	B07	9	sp|Q92979|NEP1_HUMAN
28626	14	IPRDPSQQEL	IPRDPSQQEL/2	2044.71	B07	10	sp|P49327|FAS_HUMAN
24486	12	APIGSRGPQL	APIGSRGPQL/2	2040.5	B07	10	sp|Q9BRQ3|NUD22_HUMAN
24383	12	APMIKKIAF	APM[147]IKKIAF/2	2031.92	B07	9	sp|Q5UIP0|RIF1_HUMAN
28358	14	TPGKKGTSL	TPGKKGTSL/2	2025.57	B07	9	sp|Q5JS37|NHLC3_HUMAN
20253	10	APVAPHFAL	APVAPHFAL/2	2025.3	B07	9	sp|Q8WU76|SCFD2_HUMAN
30374	15	SPRFPAQYL	SPRFPAQYL/2	2024.93	B07	9	sp|Q15477|SKIV2_HUMAN
26293	13	GPALGRSFL	GPALGRSFL/2	2022.54	B07	9	sp|P32970|CD70_HUMAN
22216	11	APVPTTTLVL	APVPTTTLVL/2	2019.64	B07	10	sp|P18583|SON_HUMAN
26241	13	APVPPPTSL	APVPPPTSL/2	2018.54	B07	9	sp|Q9NTJ4|MA2C1_HUMAN
30202	15	NPRKVVGQQDL	NPRKVVGQQDL/3	2013.47	B07	11	sp|Q92609|TBCD5_HUMAN
28187	14	SPGPEKMAL	SPGPEKM[147]AL/2	2013.36	B07	9	sp|O75995|SASH3_HUMAN
30188	15	SPETRENAL	SPETRENAL/2	2012.53	B07	9	sp|Q92600|RCD1_HUMAN
25998	13	RPPPSPSGTL	RPPPSPSGTL/2	1999.85	B07	10	sp|Q14156|EFR3A_HUMAN
27946	14	NPRLIASSL	NPRLIASSL/2	1996.14	B07	9	sp|Q14C86|GAPD1_HUMAN
21901	11	KPMMPQESL	KPM[147]M[147]PQESL/2	1991	B07	9	sp|Q5JSZ5|PRC2B_HUMAN
23884	12	APSPPLSGL	APSPPLSGL/2	1990.33	B07	9	sp|Q96GQ5|CP058_HUMAN
21803	11	RPLFPGSTV	RPLFPGSTV/2	1982.09	B07	9	sp|Q00536|CDK16_HUMAN
23757	12	KPSPKTIAF	KPSPKTIAF/2	1979.75	B07	9	sp|Q9BRU9|UTP23_HUMAN
25523	13	APARPGPAA	APARPGPAA/2	1963.31	B07	9	sp|Q04637|IF4G1_HUMAN
29383	15	SPEGPSKPSL	SPEGPSKPSL/2	1958.87	B07	10	sp|Q9P1Y5|CAMP3_HUMAN
21546	11	KPVSSNNSL	KPVSSNNSL/2	1958.73	B07	9	sp|O60318|GANP_HUMAN
17588	9	APLPGMTSL	APLPGM[147]TSL/2	1954.22	B07	9	sp|Q13952|NFYC_HUMAN
21462	11	RPAEVGGMQL	RPAEVGGM[147]QL/2	1951.09	B07	10	sp|P33316|DUT_HUMAN
25298	13	SPLKKEQPL	SPLKKEQPL/2	1946	B07	9	sp|Q53H80|AKIR2_HUMAN
25293	13	SPANPAHIL	SPANPAHIL/2	1945.62	B07	9	sp|Q9H967|WDR76_HUMAN
25285	13	LPALPTQAL	LPALPTQAL/2	1945	B07	9	sp|Q9P2Q2|FRM4A_HUMAN
25253	13	APNPYRQAIM	APNPYRQAIM[147]/2	1942.54	B07	10	sp|Q7RTS9|DYM_HUMAN
23171	12	SPMPPSEVKL	SPM[147]PPSEVKL/2	1930.92	B07	10	sp|Q9BWG6|SCNM1_HUMAN
21074	11	SPQAPTHFL	SPQAPTHFL/2	1915.82	B07	9	sp|P49773|HINT1_HUMAN
17219	9	KPSGVSAAL	KPSGVSAAL/2	1913.22	B07	9	sp|Q9Y3A4|RRP7A_HUMAN
28623	15	LPRSIGNLTQL	LPRSIGNLTQL/2	1908.2	B07	11	sp|Q6UWE0|LRSM1_HUMAN
26649	14	IPRSILMTTF	IPRSILM[147]TTF/2	1903.5	B07	10	sp|Q16531|DDB1_HUMAN
24572	13	TPAEARTTTL	TPAEARTTTL/2	1890.15	B07	10	sp|P98198|AT8B2_HUMAN
26382	14	SPNQSLRLGL	SPNQSLRLGL/2	1884.43	B07	10	sp|Q96B01|R51A1_HUMAN
24454	13	RPHHDASTF	RPHHDASTF/2	1881.08	B07	9	sp|O00469|PLOD2_HUMAN
18797	10	RPSSQYIVAL	RPSSQYIVAL/2	1879.7	B07	10	sp|Q9GIP4|LAT1L_HUMAN
22531	12	IPASNRLLL	IPASNRLLL/2	1877.58	B07	9	sp|Q2NKX8|ERC6L_HUMAN
30013	16	SPRPPAEGF	SPRPPAEGF/2	1875.81	B07	9	sp|Q9BWN1|PRR14_HUMAN
22473	12	APAAPSATAL	APAAPSATAL/2	1872.75	B07	10	sp|Q8N5H7|SH2D3_HUMAN
24278	13	RPQSSRPVLL	RPQSSRPVLL/3	1867.54	B07	10	sp|Q8IWB7|WDFY1_HUMAN
29807	16	TPKKLGNSL	TPKKLGNSL/2	1862.94	B07	9	sp|Q14980|NUMA1_HUMAN
24192	13	APVLPHTAV	APVLPHTAV/2	1860.92	B07	9	sp|Q6PCT2|FXL19_HUMAN
22318	12	SPFKRQLSL	SPFKRQLSL/2	1859.83	B07	9	sp|Q9Y6R0|NUMBL_HUMAN
16725	9	RPAPHPLFL	RPAPHPLFL/2	1858.33	B07	9	sp|Q96C12|ARMC5_HUMAN
27854	15	SPRLLEVTNTI	SPRLLEVTNTI/2	1856.93	B07	11	sp|Q460N5|PAR14_HUMAN
29691	16	LPKQPPLAL	LPKQPPLAL/2	1855.69	B07	9	sp|Q96S59|RANB9_HUMAN
22266	12	MPRGVVVTL	MPRGVVVTL/2	1855.5	B07	9	sp|Q9ULT8|HECD1_HUMAN
25969	14	HPRDPNLLLSV	HPRDPNLLLSV/2	1854.93	B07	11	sp|O75530|EED_HUMAN
27802	15	KPRYPPDSVRL	KPRYPPDSVRL/3	1853.47	B07	11	sp|Q9H7B4|SMYD3_HUMAN
25935	14	VPAENKSVL	VPAENKSVL/2	1852.5	B07	9	sp|A2RUB6|CCD66_HUMAN
29568	16	SPRAPVSPLKF	SPRAPVSPLKF/3	1848	B07	11	sp|Q9UBS0|KS6B2_HUMAN
24023	13	APAPRPSLL	APAPRPSLL/2	1847.92	B07	9	sp|Q92620|PRP16_HUMAN
31411	17	GPEKTRSQL	GPEKTRSQL/2	1847.71	B07	9	sp|Q15833|STXB2_HUMAN
27680	15	FPNIPGKSL	FPNIPGKSL/2	1845.33	B07	9	sp|O15121|DEGS1_HUMAN
27577	15	KPTSERKVSL	KPTSERKVSL/3	1838.47	B07	10	sp|O14777|NDC80_HUMAN
20075	11	APYKSVTSL	APYKSVTSL/2	1825	B07	9	sp|Q6ZV73|FGD6_HUMAN
21725	12	YPAAKRVKL	YPAAKRVKL/2	1810.42	B07	9	sp|P01106|MYC_HUMAN
27133	15	IPKTSGSEM	IPKTSGSEM[147]/2	1808.87	B07	9	sp|Q86T24|KAISO_HUMAN
27096	15	RPKALTQVL	RPKALTQVL/2	1806.4	B07	9	sp|Q9Y2Q5|LTOR2_HUMAN
26748	15	APASPFRQL	APASPFRQL/2	1783.2	B07	9	sp|Q07021|C1QBP_HUMAN
21381	12	AARPATSTL	AARPATSTL/2	1781.75	B07	9	sp|Q04637|IF4G1_HUMAN
28453	16	LPRPPPPEM	LPRPPPPEM[147]/2	1778.31	B07	9	sp|Q00325|MPCP_HUMAN
24722	14	APGKRILVL	APGKRILVL/2	1765.86	B07	9	sp|O60870|KIN17_HUMAN
24679	14	APNYRLKSL	APNYRLKSL/2	1762.79	B07	9	sp|Q9HBM6|TAF9B_HUMAN
26401	15	KPVYPGQTL	KPVYPGQTL/2	1760.07	B07	9	sp|P51659|DHB4_HUMAN
28144	16	RPREAEVRF	RPREAEVRF/3	1759	B07	9	sp|Q13438|OS9_HUMAN
22848	13	APARASVIL	APARASVIL/2	1757.54	B07	9	sp|Q9NUQ8|ABCF3_HUMAN
26253	15	IPRITIEM	IPRITIEM[147]/2	1750.2	B07	8	sp|P11388|TOP2A_HUMAN
26197	15	APSGTRVVQVL	APSGTRVVQVL/2	1746.47	B07	11	sp|Q9UN70|PCDGK_HUMAN
26121	15	KPRNVQILNM	KPRNVQILNM[147]/2	1741.4	B07	10	sp|Q5SRD1|TI23B_HUMAN
26098	15	SPRYIFTML	SPRYIFTM[147]L/2	1739.87	B07	9	sp|Q02880|TOP2B_HUMAN
22587	13	GPAPRVLSL	GPAPRVLSL/2	1737.46	B07	9	sp|P49750|YLPM1_HUMAN
24314	14	RPADPEKNQSL	RPADPEKNQSL/3	1736.71	B07	11	sp|Q9H8H0|NOL11_HUMAN
17363	10	VPMFRNVSL	VPM[147]FRNVSL/2	1736.3	B07	9	sp|O14980|XPO1_HUMAN
27777	16	TPAQKASVL	TPAQKASVL/2	1736.06	B07	9	sp|Q9UIF8|BAZ2B_HUMAN
29497	17	GPRAPGPSL	GPRAPGPSL/2	1735.12	B07	9	sp|O00746|NDKM_HUMAN
25933	15	SPTGRYTTL	SPTGRYTTL/2	1728.87	B07	9	sp|Q9NTI2|AT8A2_HUMAN
25860	15	RPQLHKNTV	RPQLHKNTV/3	1724	B07	9	sp|Q14258|TRI25_HUMAN
22342	13	RPQKVCSFL	RPQKVCSFL/2	1718.62	B07	9	sp|P63218|GBG5_HUMAN
25751	15	RPEEGRPVV	RPEEGRPVV/2	1716.73	B07	9	sp|P27816|MAP4_HUMAN
22166	13	RPSPPVQSV	RPSPPVQSV/2	1705.08	B07	9	sp|Q5VV67|PPRC1_HUMAN
23627	14	KPRGLFITI	KPRGLFITI/2	1687.64	B07	9	sp|P48163|MAOX_HUMAN
28647	17	RPKETDHKSL	RPKETDHKSL/3	1685.12	B07	10	sp|Q9BVI0|PHF20_HUMAN
26922	16	TPEEVRLPL	TPEEVRLPL/2	1682.62	B07	9	sp|Q9UIF9|BAZ2A_HUMAN
23490	14	RPQAPATVGL	RPQAPATVGL/2	1677.86	B07	10	sp|Q15370|ELOB_HUMAN
26797	16	LPKTGTVSL	LPKTGTVSL/2	1674.81	B07	9	sp|P49327|FAS_HUMAN
18377	11	APAPVQPPM	APAPVQPPM[147]/2	1670.64	B07	9	sp|O14497|ARI1A_HUMAN
25055	15	LPQLPLAAL	LPQLPLAAL/2	1670.33	B07	9	sp|P23610|F8I2_HUMAN
24969	15	APRTVLLLLSAA	APRTVLLLLSAA/2	1664.6	B07	12	sp|P01889|1B07_HUMAN
23193	14	APSEAANSL	APSEAANSL/2	1656.64	B07	9	sp|P27708|PYR1_HUMAN
24847	15	MPSQFRDIL	MPSQFRDIL/2	1656.47	B07	9	sp|Q09472|EP300_HUMAN
26416	16	SPNGTIRNIL	SPNGTIRNIL/2	1651	B07	10	sp|O75874|IDHC_HUMAN
21453	13	LPAPKWTEL	LPAPKWTEL/2	1650.23	B07	9	sp|P52333|JAK3_HUMAN
26385	16	IPRLIVSQL	IPRLIVSQL/2	1649.06	B07	9	sp|Q9BXW9|FACD2_HUMAN
27949	17	GPSVLRSTL	GPSVLRSTL/2	1644.06	B07	9	sp|O75376|NCOR1_HUMAN
24638	15	HPHAVNEIAL	HPHAVNEIAL/2	1642.53	B07	10	sp|Q96PY5|FMNL2_HUMAN
27914	17	TPRDLVLRSL	TPRDLVLRSL/3	1642	B07	10	sp|B0I1T2|MYO1G_HUMAN
21294	13	AARAVTGVL	AARAVTGVL/2	1638	B07	9	sp|Q9UG63|ABCF2_HUMAN
19641	12	NVRIATTAL	NVRIATTAL/2	1636.75	B07	9	sp|Q13571|LAPM5_HUMAN
24438	15	RPHHKILDM	RPHHKILDM[147]/3	1629.2	B07	9	sp|Q08J23|NSUN2_HUMAN
19440	12	RPYAPINANAI	RPYAPINANAI/2	1620	B07	11	sp|O94776|MTA2_HUMAN
25884	16	LPTWRPTSM	LPTWRPTSM[147]/2	1617.75	B07	9	sp|Q8TB40|ABHD4_HUMAN
27483	17	KPTGTPKAL	KPTGTPKAL/2	1616.65	B07	9	sp|Q99685|MGLL_HUMAN
17714	11	RPAEVRLLIL	RPAEVRLLIL/3	1610.36	B07	10	sp|Q8TEM1|PO210_HUMAN
20840	13	SPANTRYLFL	SPANTRYLFL/2	1603.08	B07	10	sp|Q08209|PP2BA_HUMAN
27214	17	SPAIKDSTM	SPAIKDSTM[147]/2	1600.82	B07	9	sp|P78346|RPP30_HUMAN
25550	16	IPRPVDGVEV	IPRPVDGVEV/2	1596.88	B07	10	sp|P26368|U2AF2_HUMAN
19152	12	FPNKQGYVL	FPNKQGYVL/2	1596	B07	9	sp|O43684|BUB3_HUMAN
23914	15	APAAPGLSL	APAAPGLSL/2	1594.27	B07	9	sp|Q9UNY4|TTF2_HUMAN
20708	13	APAPKAYVL	APAPKAYVL/2	1592.92	B07	9	sp|A6NDG6|PGP_HUMAN
27054	17	APNTGRANQQM	APNTGRANQQM[147]/2	1591.41	B07	11	sp|Q9NZS9|BFAR_HUMAN
23866	15	APPSRLASAL	APPSRLASAL/2	1591.07	B07	10	sp|Q9UHR6|ZNHI2_HUMAN
23842	15	AARAPPQAL	AARAPPQAL/2	1589.47	B07	9	sp|Q9BTV7|CABL2_HUMAN
19039	12	LARPASAAL	LARPASAAL/2	1586.58	B07	9	sp|P40926|MDHM_HUMAN
26958	17	GPNPKSSRTTL	GPNPKSSRTTL/3	1585.77	B07	11	sp|P17480|UBF1_HUMAN
23763	15	KPSLPFTSL	KPSLPFTSL/2	1584.2	B07	9	sp|P31785|IL2RG_HUMAN
28458	18	NPNLRKNVL	NPNLRKNVL/2	1581	B07	9	sp|P23193|TCEA1_HUMAN
22133	14	SPSDRPLSL	SPSDRPLSL/2	1580.93	B07	9	sp|Q12769|NU160_HUMAN
23711	15	RPQSGANGL	RPQSGANGL/2	1580.73	B07	9	sp|Q8WVX3|CD003_HUMAN
29972	19	SPGRPGKSV	SPGRPGKSV/2	1577.47	B07	9	sp|Q92918|M4K1_HUMAN
29766	19	SPRTPVSPVKF	SPRTPVSPVKF/2	1566.63	B07	11	sp|P23443|KS6B1_HUMAN
25063	16	SPQQVSAQL	SPQQVSAQL/2	1566.44	B07	9	sp|Q2TAL8|QRIC1_HUMAN
29704	19	NPRNTEAVTL	NPRNTEAVTL/2	1563.37	B07	10	sp|Q9UKF6|CPSF3_HUMAN
17164	11	RPLYKNIVL	RPLYKNIVL/2	1560.36	B07	9	sp|P61158|ARP3_HUMAN
24903	16	FPRLPPASV	FPRLPPASV/2	1556.44	B07	9	sp|Q6ZRI6|CO039_HUMAN
26421	17	APSGQHSQAQL	APSGQHSQAQL/2	1554.18	B07	11	sp|O00411|RPOM_HUMAN
27963	18	APTLRAQL	APTLRAQL/2	1553.5	B07	8	sp|A8MPS7|YDJC_HUMAN
27789	18	APGQRVGML	APGQRVGM[147]L/2	1543.83	B07	9	sp|P36956|SRBP1_HUMAN
18487	12	RPYTNKVITL	RPYTNKVITL/3	1540.58	B07	10	sp|Q14004|CDK13_HUMAN
21558	14	TPIQGTSEL	TPIQGTSEL/2	1539.86	B07	9	sp|Q13761|RUNX3_HUMAN
15382	10	SPWLLRVEL	SPWLLRVEL/2	1538.2	B07	9	sp|P24928|RPB1_HUMAN
24574	16	SPLNRAGLL	SPLNRAGLL/2	1535.88	B07	9	sp|Q92979|NEP1_HUMAN
21451	14	HPAAKMIVM	HPAAKMIVM/2	1532.21	B07	9	sp|P50990|TCPQ_HUMAN
18382	12	RPADSMLNVL	RPADSM[147]LNVL/2	1531.83	B07	10	sp|Q9BTL4|IER2_HUMAN
27414	18	TPQSNRPVM	TPQSNRPVM[147]/2	1523	B07	9	sp|P24928|RPB1_HUMAN
27401	18	SPSVDKARAEL	SPSVDKARAEL/2	1522.28	B07	11	sp|Q9BY66|KDM5D_HUMAN
22686	15	APINKAGSFL	APINKAGSFL/2	1512.4	B07	10	sp|P51451|BLK_HUMAN
28423	19	KPKKPVGAA	KPKKPVGAA/2	1495.95	B07	9	sp|P16403|H12_HUMAN
23880	16	IPKPLNPAL	IPKPLNPAL/2	1492.5	B07	9	sp|P62952|BLCAP_HUMAN
20819	14	RPFPKLRIL	RPFPKLRIL/3	1487.07	B07	9	sp|P04818|TYSY_HUMAN
19305	13	SPQKVTLYL	SPQKVTLYL/2	1485	B07	9	sp|P05107|ITB2_HUMAN
29619	20	LPRPVPQNL	LPRPVPQNL/2	1480.95	B07	9	sp|Q9NWF9|RN216_HUMAN
23469	16	KPVAPSNVL	KPVAPSNVL/2	1466.81	B07	9	sp|Q9NVU0|RPC5_HUMAN
27855	19	LPRALGSGFPHL	LPRALGSGFPHL/3	1466.05	B07	12	sp|Q96CX6|LRC58_HUMAN
26352	18	LPAPPTQNM	LPAPPTQNM[147]/2	1464	B07	9	sp|O75177|CREST_HUMAN
23365	16	SPALNKMFCQL	SPALNKMFCQL/2	1460.31	B07	11	sp|P04637|P53_HUMAN
29199	20	TPSGSREGSL	TPSGSREGSL/2	1459.95	B07	10	sp|Q6P3S6|FBX42_HUMAN
29164	20	SPHGPSAKF	SPHGPSAKF/2	1458.2	B07	9	sp|Q8TDN6|BRX1_HUMAN
29121	20	APSQQRQQI	APSQQRQQI/2	1456.05	B07	9	sp|Q6P2Q9|PRP8_HUMAN
21836	15	SPALGLRGL	SPALGLRGL/2	1455.73	B07	9	sp|P46940|IQGA1_HUMAN
27435	19	LPRALLTQL	LPRALLTQL/2	1443.95	B07	9	sp|Q12851|M4K2_HUMAN
27395	19	RPKYPGIKF	RPKYPGIKF/3	1441.84	B07	9	sp|P45984|MK09_HUMAN
24459	17	RPGVKLTL	RPGVKLTL/2	1438.77	B07	8	sp|P45880|VDAC2_HUMAN
25833	18	SPNLRLLDL	SPNLRLLDL/2	1435.17	B07	9	sp|Q8N531|FBXL6_HUMAN
27159	19	LPHAPGVQM	LPHAPGVQM[147]/2	1429.42	B07	9	sp|Q13547|HDAC1_HUMAN
18571	13	SPLTKSISL	SPLTKSISL/2	1428.54	B07	9	sp|Q12802|AKP13_HUMAN
24203	17	LPSLPTAEL	LPSLPTAEL/2	1423.71	B07	9	sp|Q6ZNJ1|NBEL2_HUMAN
21106	15	LPSDLRTISL	LPSDLRTISL/2	1407.07	B07	10	sp|Q9C0A6|SETD5_HUMAN
22509	16	RPSLRLQLL	RPSLRLQLL/2	1406.81	B07	9	sp|Q7L2H7|EIF3M_HUMAN
14023	10	RPAPLPAAV	RPAPLPAAV/2	1402.3	B07	9	sp|Q6ZRI6|CO039_HUMAN
28037	20	APRNSAELTVI	APRNSAELTVI/2	1401.85	B07	11	sp|O60566|BUB1B_HUMAN
25169	18	KPSPPPVKEL	KPSPPPVKEL/2	1398.28	B07	10	sp|Q8IYI6|EXOC8_HUMAN
24961	18	APAPSTVHF	APAPSTVHF/2	1386.72	B07	9	sp|Q13118|KLF10_HUMAN
26232	19	RPHAPHSPIKF	RPHAPHSPIKF/3	1380.63	B07	11	sp|P52797|EFNA3_HUMAN
27590	20	LPDLQRSKQAL	LPDLQRSKQAL/3	1379.5	B07	11	sp|Q9UL45|BL1S6_HUMAN
23359	17	KPRPIIPML	KPRPIIPM[147]L/2	1374.06	B07	9	sp|O94953|KDM4B_HUMAN
30147	22	KPEEQRKTL	KPEEQRKTL/3	1370.32	B07	9	sp|Q13823|NOG2_HUMAN
19146	14	ATREAGSAL	ATREAGSAL/2	1367.57	B07	9	sp|P20248|CCNA2_HUMAN
28537	21	APKKSEAAV	APKKSEAAV/2	1358.9	B07	9	sp|Q9NR20|DYRK4_HUMAN
27147	20	RPKTFGMDM	RPKTFGM[147]DM[147]/2	1357.35	B07	9	sp|Q08116|RGS1_HUMAN
19001	14	VPAARSILAL	VPAARSILAL/2	1357.21	B07	10	sp|O94906|PRP6_HUMAN
25779	19	VPQPHPQTL	VPQPHPQTL/2	1356.79	B07	9	sp|O14776|TCRG1_HUMAN
17512	13	GPLGSTIPM	GPLGSTIPM[147]/2	1347.08	B07	9	sp|Q15038|DAZP2_HUMAN
28247	21	VPSEGKKSL	VPSEGKKSL/2	1345.1	B07	9	sp|Q9BXS6|NUSAP_HUMAN
28199	21	NPRNFSDNQL	NPRNFSDNQL/2	1342.81	B07	10	sp|P37802|TAGL2_HUMAN
28072	21	NPRFQEADSPTL	NPRFQEADSPTL/2	1336.76	B07	12	sp|P26010|ITB7_HUMAN
23996	18	NPASPPLSL	NPASPPLSL/2	1333.11	B07	9	sp|Q13155|AIMP2_HUMAN
21300	16	APVGVHPSL	APVGVHPSL/2	1331.25	B07	9	sp|A6NFQ2|F115C_HUMAN
29213	22	LPRLTPPVL	LPRLTPPVL/2	1327.86	B07	9	sp|P50990|TCPQ_HUMAN
27810	21	RPKAQPTTL	RPKAQPTTL/2	1324.29	B07	9	sp|Q6P2C8|MED27_HUMAN
23817	18	APAAGSKVL	APAAGSKVL/2	1323.17	B07	9	sp|Q9Y2U8|MAN1_HUMAN
27723	21	NPRLNILDTL	NPRLNILDTL/2	1320.14	B07	10	sp|Q13200|PSMD2_HUMAN
22439	17	RPNGTKVAVLL	RPNGTKVAVLL/3	1319.94	B07	11	sp|Q8NHH9|ATLA2_HUMAN
19735	15	SPISHFLDL	SPISHFLDL/2	1315.67	B07	9	sp|Q9NVI1|FANCI_HUMAN
21028	16	APAATPHLSL	APAATPHLSL/2	1314.25	B07	10	sp|O15054|KDM6B_HUMAN
23655	18	APGPITMDL	APGPITM[147]DL/2	1314.17	B07	9	sp|P52566|GDIR2_HUMAN
22308	17	APIAKVGVL	APIAKVGVL/2	1312.23	B07	9	sp|Q9UHB6|LIMA1_HUMAN
28555	22	APKPAAPTTL	APKPAAPTTL/2	1297.95	B07	10	sp|Q9NR82|KCNQ5_HUMAN
19458	15	RPHTVLTVI	RPHTVLTVI/2	1297.2	B07	9	sp|Q12788|TBL3_HUMAN
28510	22	IPRVVQEGDVL	IPRVVQEGDVL/2	1295.91	B07	11	sp|Q13608|PEX6_HUMAN
23287	18	SPSNTRYLFL	SPSNTRYLFL/2	1293.72	B07	10	sp|P48454|PP2BC_HUMAN
25651	20	APARPVNCL	APARPVNCL/2	1282.55	B07	9	sp|O14562|UBFD1_HUMAN
31915	25	SPRTPPQRF	SPRTPPQRF/3	1276.6	B07	9	sp|Q14CS0|UBX2B_HUMAN
20223	16	SPNQKLLAV	SPNQKLLAV/2	1263.94	B07	9	sp|Q9UNX4|WDR3_HUMAN
26513	21	LPRTIFPTSTI	LPRTIFPTSTI/2	1262.52	B07	11	sp|Q99590|SCAFB_HUMAN
25173	20	YPKRPLLGL	YPKRPLLGL/2	1258.65	B07	9	sp|Q9GZR7|DDX24_HUMAN
23554	19	RPLSKTVRF	RPLSKTVRF/3	1239.68	B07	9	sp|P62280|RS11_HUMAN
24753	20	APRTVLLLLSA	APRTVLLLLSA/2	1237.65	B07	11	sp|P01889|1B07_HUMAN
23467	19	KPVNPSPLSQL	KPVNPSPLSQL/2	1235.11	B07	11	sp|O14734|ACOT8_HUMAN
25878	21	NPNMRLSQL	NPNM[147]RLSQL/2	1232.29	B07	9	sp|Q96CT7|CC124_HUMAN
23401	19	APSQQRLVVV	APSQQRLVVV/2	1231.63	B07	10	sp|Q9H6Q4|NARFL_HUMAN
19683	16	RPAPAAPLL	RPAPAAPLL/2	1230.19	B07	9	sp|Q96PM9|Z385A_HUMAN
25777	21	VPNQKRLTLL	VPNQKRLTLL/2	1227.48	B07	10	sp|O60488|ACSL4_HUMAN
28065	23	NPHEPWNRL	NPHEPWNRL/3	1220.22	B07	9	sp|Q8WXX7|AUTS2_HUMAN
25598	21	RPKDPNNLL	RPKDPNNLL/2	1218.95	B07	9	sp|O00232|PSD12_HUMAN
25547	21	SPGERATL	SPGERATL/2	1216.52	B07	8	sp|P01621|KV303_HUMAN
27846	23	LPQANRDTL	LPQANRDTL/2	1210.7	B07	9	sp|Q9H0H5|RGAP1_HUMAN
25280	21	QPMNPTQNM	QPM[147]NPTQNM[147]/2	1203.81	B07	9	sp|Q14444|CAPR1_HUMAN
28797	24	NPKNPGLWL	NPKNPGLWL/2	1199.88	B07	9	sp|O94906|PRP6_HUMAN
23875	20	SPNSKVNTL	SPNSKVNTL/2	1193.75	B07	9	sp|P40939|ECHA_HUMAN
22662	19	RPKPIITSV	RPKPIITSV/2	1192.74	B07	9	sp|P0CG13|CTF8_HUMAN
17740	15	FPHLVHAEL	FPHLVHAEL/2	1182.67	B07	9	sp|Q8IXI1|MIRO2_HUMAN
22350	19	RPVQKLIRL	RPVQKLIRL/3	1176.32	B07	9	sp|Q5W0V3|F16B1_HUMAN
18774	16	KPVGVAASL	KPVGVAASL/2	1173.38	B07	9	sp|Q14687|GSE1_HUMAN
23455	20	SPTYRALLL	SPTYRALLL/2	1172.75	B07	9	sp|P49795|RGS19_HUMAN
16361	14	RPYEPINSI	RPYEPINSI/2	1168.64	B07	9	sp|Q8WUA4|TF3C2_HUMAN
26876	23	RPKLIGEEL	RPKLIGEEL/2	1168.52	B07	9	sp|P54252|ATX3_HUMAN
17475	15	MPALRSINL	M[147]PALRSINL/2	1165	B07	9	sp|Q8TCA0|LRC20_HUMAN
27767	24	APYSRPKQL	APYSRPKQL/2	1156.96	B07	9	sp|Q86V81|THOC4_HUMAN
20704	18	APSLKQFSL	APSLKQFSL/2	1150.22	B07	9	sp|Q9UGJ1|GCP4_HUMAN
22849	20	SPQGRVMTI	SPQGRVM[147]TI/2	1142.45	B07	9	sp|Q15365|PCBP1_HUMAN
26268	23	VPAKAKLTKL	VPAKAKLTKL/2	1142.09	B07	10	sp|P51825|AFF1_HUMAN
23895	21	KPRDVSSVELL	KPRDVSSVELL/2	1137.86	B07	11	sp|Q01082|SPTB2_HUMAN
22681	20	LPSASHFSQL	LPSASHFSQL/2	1134.05	B07	10	sp|Q9Y520|PRC2C_HUMAN
27197	24	KPRSLQTGF	KPRSLQTGF/2	1133.21	B07	9	sp|Q9H0Z9|RBM38_HUMAN
18108	16	TPISRLVAL	TPISRLVAL/2	1131.75	B07	9	sp|Q9H765|ASB8_HUMAN
16950	15	KPIEASIRGEL	KPIEASIRGEL/2	1130	B07	11	sp|P08133|ANXA6_HUMAN
24724	22	LPSATRALEL	LPSATRALEL/2	1123.82	B07	10	sp|P18583|SON_HUMAN
29179	26	VPKAPGLGL	VPKAPGLGL/2	1122.27	B07	9	sp|Q9Y606|TRUA_HUMAN
18994	17	KPAASPLTSL	KPAASPLTSL/2	1117.29	B07	10	sp|Q92615|LAR4B_HUMAN
26648	24	APDSQRLKL	APDSQRLKL/2	1110.33	B07	9	sp|Q9UQE7|SMC3_HUMAN
21064	19	YPNRGNTCL	YPNRGNTCL/2	1108.63	B07	9	sp|Q8WUH1|CHUR_HUMAN
25485	23	TPWQPPTVL	TPWQPPTVL/2	1108.04	B07	9	sp|Q9NZJ0|DTL_HUMAN
26468	24	RPKPSSSPVIF	RPKPSSSPVIF/2	1102.83	B07	11	sp|Q15366|PCBP2_HUMAN
19753	18	RPHAFQVIL	RPHAFQVIL/3	1097.39	B07	9	sp|Q8IWE5|PKHM2_HUMAN
24126	22	RPQGGQDIL	RPQGGQDIL/2	1096.64	B07	9	sp|Q9Y265|RUVB1_HUMAN
27108	25	QPQDRNQAL	QPQDRNQAL/2	1084.32	B07	9	sp|Q86YV0|RASL3_HUMAN
28992	27	LPRGMQPTEF	LPRGM[147]QPTEF/2	1073.78	B07	10	sp|P28062|PSB8_HUMAN
24554	23	TARPQSSAL	TARPQSSAL/2	1067.57	B07	9	sp|Q8N3J3|CQ053_HUMAN
28653	27	GPRHPVCLL	GPRHPVCLL/2	1061.22	B07	9	sp|Q9HCN4|GPN1_HUMAN
29701	28	VPREAPESAQCL	VPREAPESAQCL/2	1060.75	B07	12	sp|Q8WTP8|AEN_HUMAN
20044	19	APSLVAPAL	APSLVAPAL/2	1054.95	B07	9	sp|Q15691|MARE1_HUMAN
27359	26	KPKDPLKISL	KPKDPLKISL/2	1052.27	B07	10	sp|Q969Q6|P2R3C_HUMAN
29446	28	IPEEQRAQL	IPEEQRAQL/2	1051.64	B07	9	sp|Q15149|PLEC_HUMAN
28009	27	QPREPQVYTL	QPREPQVYTL/2	1037.37	B07	10	sp|P01857|IGHG1_HUMAN
25923	25	MPPSGPRGTL	M[147]PPSGPRGTL/2	1036.92	B07	10	sp|Q02818|NUCB1_HUMAN
15526	15	RPIASGPVV	RPIASGPVV/2	1035.07	B07	9	sp|Q86TG7|PEG10_HUMAN
23802	23	SPVSRIGL	SPVSRIGL/2	1034.87	B07	8	sp|P22695|QCR2_HUMAN
24799	24	YPFKPPKVAF	YPFKPPKVAF/3	1033.29	B07	10	sp|P62837|UB2D2_HUMAN
24716	24	SVRSTTRQM	SVRSTTRQM[147]/3	1029.83	B07	9	sp|Q7Z591|AKNA_HUMAN
16183	16	SPWKPPTYL	SPWKPPTYL/2	1011.44	B07	9	sp|Q8IY47|KBTB2_HUMAN
17075	17	LPDERTISL	LPDERTISL/2	1004.41	B07	9	sp|Q05048|CSTF1_HUMAN
19773	20	VVREPSGTL	VVREPSGTL/2	988.65	B07	9	sp|P82650|RT22_HUMAN
22617	23	KPQTKLLIL	KPQTKLLIL/2	983.348	B07	9	sp|Q99081|HTF4_HUMAN
24495	25	APAERQIDL	APAERQIDL/2	979.8	B07	9	sp|Q29RF7|PDS5A_HUMAN
19290	20	IPANWKTEL	IPANWKTEL/2	964.5	B07	9	sp|Q4LE39|ARI4B_HUMAN
19265	20	VARPLSTAL	VARPLSTAL/2	963.25	B07	9	sp|O14561|ACPM_HUMAN
20225	21	RPDGHQNNL	RPDGHQNNL/2	963.095	B07	9	sp|Q14974|IMB1_HUMAN
18221	19	APDCHGPVL	APDCHGPVL/2	959	B07	9	sp|Q9Y546|LRC42_HUMAN
25750	27	SPYQNIKIL	SPYQNIKIL/2	953.704	B07	9	sp|P52788|SPSY_HUMAN
21923	23	KPGPPQLSV	KPGPPQLSV/2	953.174	B07	9	sp|Q75QN2|INT8_HUMAN
18095	19	SPIHWSDRDSL	SPIHWSDRDSL/3	952.368	B07	11	sp|Q86SU0|ILDR1_HUMAN
26503	28	YPKGAGEML	YPKGAGEM[147]L/2	946.536	B07	9	sp|Q96DE5|APC16_HUMAN
21686	23	HPNGNITEL	HPNGNITEL/2	942.87	B07	9	sp|Q7KZF4|SND1_HUMAN
27247	29	KPTSKDQVL	KPTSKDQVL/2	939.552	B07	9	sp|Q14008|CKAP5_HUMAN
26237	28	SPGQRAVLL	SPGQRAVLL/2	937.036	B07	9	sp|Q12772|SRBP2_HUMAN
28001	30	APRLQSEVA	APRLQSEVA/2	933.367	B07	9	sp|P53990|IST1_HUMAN
26087	28	SPSTNRGPIQM	SPSTNRGPIQM[147]/2	931.679	B07	11	sp|Q6VMQ6|MCAF1_HUMAN
24216	26	APHLVGPHL	APHLVGPHL/2	931.385	B07	9	sp|Q96GK7|FAH2A_HUMAN
16734	18	RPITDSPVL	RPITDSPVL/2	929.667	B07	9	sp|Q9NZL9|MAT2B_HUMAN
24940	27	APGVRAVEL	APGVRAVEL/2	923.704	B07	9	sp|Q9Y508|RN114_HUMAN
20114	22	APNAGSRMTQTV	APNAGSRMTQTV/2	914.273	B07	12	sp|P51659|DHB4_HUMAN
26495	29	TPARKEISL	TPARKEISL/2	913.621	B07	9	sp|Q8NDZ2|SIMC1_HUMAN
29991	33	SPTIGKQL	SPTIGKQL/2	908.818	B07	8	sp|P42285|SK2L2_HUMAN
27829	31	APKAPAATSI	APKAPAATSI/2	897.71	B07	10	sp|Q969V6|MKL1_HUMAN
19684	22	KPGPVGPEL	KPGPVGPEL/2	894.727	B07	9	sp|O95817|BAG3_HUMAN
9815	11	KPMKSVLVV	KPM[147]KSVLVV/2	892.273	B07	9	sp|P32248|CCR7_HUMAN
21355	24	WPKDVGIVAL	WPKDVGIVAL/2	889.792	B07	10	sp|Q01581|HMCS1_HUMAN
17658	20	YPAQITPKM	YPAQITPKM[147]/2	882.9	B07	9	sp|Q9NX74|DUS2L_HUMAN
14984	17	AIRNAMGSL	AIRNAM[147]GSL/2	881.412	B07	9	sp|P55036|PSMD4_HUMAN
25504	29	APAPIHNQF	APAPIHNQF/2	879.448	B07	9	sp|Q15011|HERP1_HUMAN
18449	21	RPNGVITGL	RPNGVITGL/2	878.524	B07	9	sp|Q96QD9|UIF_HUMAN
10462	12	HPLEGTHEL	HPLEGTHEL/2	871.833	B07	9	sp|Q8IWR0|Z3H7A_HUMAN
21445	25	HPIYNIKSL	HPIYNIKSL/2	857.8	B07	9	sp|Q13601|KRR1_HUMAN
16268	19	KPIAVGSMSML	KPIAVGSM[147]SM[147]L/2	856.211	B07	11	sp|Q9UBT6|POLK_HUMAN
16730	20	RPLNALDEL	RPLNALDEL/2	836.5	B07	9	sp|Q70Z35|PREX2_HUMAN
22506	27	HPFPGPGLAI	HPFPGPGLAI/2	833.556	B07	10	sp|P49915|GUAA_HUMAN
26818	33	GPNSNRSQF	GPNSNRSQF/2	812.667	B07	9	sp|Q13356|PPIL2_HUMAN
13798	17	KPAPPFNVTV	KPAPPFNVTV/2	811.647	B07	10	sp|Q9HBE5|IL21R_HUMAN
27276	34	SPSPLRAGVDI	SPSPLRAGVDI/2	802.235	B07	11	sp|A6NED2|RCCD1_HUMAN
13638	17	RPQEVSAYL	RPQEVSAYL/2	802.235	B07	9	sp|Q6NXE6|ARMC6_HUMAN
24763	31	RPTDKPLRL	RPTDKPLRL/2	798.806	B07	9	sp|P68104|EF1A1_HUMAN
15169	19	RVNNNRGNSL	RVNNNRGNSL/2	798.368	B07	10	sp|Q9Y5M8|SRPRB_HUMAN
22133	28	SPSAAHFITRL	SPSAAHFITRL/3	790.464	B07	11	sp|Q8NDH3|PEPL1_HUMAN
18077	23	APSEYRYTLL	APSEYRYTLL/2	785.957	B07	10	sp|Q9BS26|ERP44_HUMAN
20430	26	SPVVRVAV	SPVVRVAV/2	785.769	B07	8	sp|P13639|EF2_HUMAN
25024	32	SPNSKMLAT	SPNSKM[147]LAT/2	782	B07	9	sp|O43172|PRP4_HUMAN
27101	35	TPSLVKSTSQL	TPSLVKSTSQL/2	774.314	B07	11	sp|Q06055|AT5G2_HUMAN
27838	36	SPKASSKLAIM	SPKASSKLAIM[147]/3	773.278	B07	11	sp|P35251|RFC1_HUMAN
23117	30	RPAPPPEQV	RPAPPPEQV/2	770.567	B07	9	sp|Q9C0G0|ZN407_HUMAN
21415	28	YPGSDRIML	YPGSDRIM[147]L/2	764.821	B07	9	sp|Q6ZS81|WDFY4_HUMAN
28286	37	RPKLPDNEV	RPKLPDNEV/2	764.486	B07	9	sp|Q7Z392|TPC11_HUMAN
25971	34	TPSEPHPVL	TPSEPHPVL/2	763.853	B07	9	sp|Q9Y5A9|YTHD2_HUMAN
29680	39	GPKQQFSTL	GPKQQFSTL/2	761.026	B07	9	sp|Q2KHR3|QSER1_HUMAN
20496	27	LPALPLAEL	LPALPLAEL/2	759.111	B07	9	sp|Q9UJX2|CDC23_HUMAN
16497	22	IPYHSEVPVSL	IPYHSEVPVSL/2	749.864	B07	11	sp|Q01082|SPTB2_HUMAN
14856	20	RPIRQILYL	RPIRQILYL/2	742.8	B07	9	sp|Q9UBQ5|EIF3K_HUMAN
12451	17	LPDSGHLHPL	LPDSGHLHPL/3	732.412	B07	10	sp|Q9Y285|SYFA_HUMAN
18193	25	RPDQGLALTLL	RPDQGLALTLL/2	727.72	B07	11	sp|Q99973|TEP1_HUMAN
25360	35	SPKPVSSTV	SPKPVSSTV/2	724.571	B07	9	sp|Q9ULT8|HECD1_HUMAN
21683	30	RPAFFAERL	RPAFFAERL/2	722.767	B07	9	sp|P20073|ANXA7_HUMAN
28150	39	RPRFEPVHF	RPRFEPVHF/3	721.795	B07	9	sp|O15226|NKRF_HUMAN
17239	24	SPIKDIISL	SPIKDIISL/2	718.292	B07	9	sp|Q9C0A0|CNTP4_HUMAN
26975	38	GPGLSRTGVEL	GPGLSRTGVEL/2	709.868	B07	11	sp|P21333|FLNA_HUMAN
16993	24	MPSASRVILL	M[147]PSASRVILL/2	708.042	B07	10	sp|Q14999|CUL7_HUMAN
23329	33	VPAKKITAA	VPAKKITAA/2	706.939	B07	9	sp|P50914|RL14_HUMAN
26781	38	APQSTPRNTV	APQSTPRNTV/2	704.763	B07	10	sp|Q9BY44|EIF2A_HUMAN
14686	21	RPFGSISRIYL	RPFGSISRIYL/3	699.333	B07	11	sp|O75821|EIF3G_HUMAN
26468	38	KPKAPPPSL	KPKAPPPSL/2	696.526	B07	9	sp|Q9NZZ3|CHMP5_HUMAN
29861	43	TPKEKAQAL	TPKEKAQAL/2	694.442	B07	9	sp|P46013|KI67_HUMAN
22276	33	TPAVIRISV	TPAVIRISV/2	675.03	B07	9	sp|P51610|HCFC1_HUMAN
18065	27	APFLRNVEL	APFLRNVEL/2	669.074	B07	9	sp|A5YKK6|CNOT1_HUMAN
23570	36	RPKSNIVLL	RPKSNIVLL/2	654.722	B07	9	sp|P11836|CD20_HUMAN
29892	46	VPRPPPLYSH	VPRPPPLYSH/3	649.826	B07	10	sp|Q96L91|EP400_HUMAN
8318	13	RAALPTPAL	RAALPTPAL/2	639.846	B07	9	sp|Q9H3S7|PTN23_HUMAN
28585	45	TPTIPHCSM	TPTIPHCSM[147]/2	635.222	B07	9	sp|Q9Y3D0|MIP18_HUMAN
25285	40	QPDQTRIVAL	QPDQTRIVAL/2	632.125	B07	10	sp|P22087|FBRL_HUMAN
31485	50	TPKMPGQSV	TPKM[147]PGQSV/2	629.7	B07	9	sp|Q8WYP5|ELYS_HUMAN
21237	34	VPDTSRIYVAL	VPDTSRIYVAL/2	624.618	B07	11	sp|Q9UBK9|UXT_HUMAN
9900	16	IVRKLVTAL	IVRKLVTAL/2	618.75	B07	9	sp|Q8TEV9|SMCR8_HUMAN
21994	36	GPNGGIVTSL	GPNGGIVTSL/2	610.944	B07	10	sp|Q9HCN4|GPN1_HUMAN
23925	40	IPPPPPPAM	IPPPPPPAM[147]/2	598.125	B07	9	sp|Q9NTJ3|SMC4_HUMAN
20877	35	LPASVHPQL	LPASVHPQL/2	596.486	B07	9	sp|Q9H0K1|SIK2_HUMAN
8937	15	SPFPFLTAL	SPFPFLTAL/2	595.8	B07	9	sp|Q9BWH6|RPAP1_HUMAN
25968	45	IPQGGRGAIQF	IPQGGRGAIQF/2	577.067	B07	11	sp|Q15437|SC23B_HUMAN
20475	36	KPQDYKKRLSV	KPQDYKKRLSV/3	568.75	B07	11	sp|P35222|CTNB1_HUMAN
21009	37	RPDDRSQGAII	RPDDRSQGAII/3	567.811	B07	11	sp|Q04637|IF4G1_HUMAN
23747	42	LPQGIVREL	LPQGIVREL/2	565.405	B07	9	sp|P63272|SPT4H_HUMAN
21230	38	TPFGGRLLVL	TPFGGRLLVL/2	558.684	B07	10	sp|Q4VC44|FWCH1_HUMAN
30891	56	RPKGESKDL	RPKGESKDL/2	551.625	B07	9	sp|Q16531|DDB1_HUMAN
29005	53	LPKKEGLSF	LPKKEGLSF/2	547.264	B07	9	sp|Q6WKZ4|RFIP1_HUMAN
27773	51	SPGPPAPHM	SPGPPAPHM[147]/2	544.569	B07	9	sp|Q86SX3|CN080_HUMAN
29804	55	LPKQPPLML	LPKQPPLM[147]L/2	541.891	B07	9	sp|Q6VN20|RBP10_HUMAN
25903	48	APEEHPVL	APEEHPVL/2	539.646	B07	8	sp|P60709|ACTB_HUMAN
26546	51	VPKNYVTVM	VPKNYVTVM[147]/2	520.51	B07	9	sp|P16333|NCK1_HUMAN
26458	52	TPSAGKAML	TPSAGKAM[147]L/2	508.808	B07	9	sp|P46013|KI67_HUMAN
21685	43	FPAAPAPKM	FPAAPAPKM[147]/2	504.302	B07	9	sp|A0AV96|RBM47_HUMAN
19713	40	SPDPHKGLVLL	SPDPHKGLVLL/3	492.825	B07	11	sp|P57737|CORO7_HUMAN
24086	50	KPTKSITCL	KPTKSITCL/2	481.72	B07	9	sp|Q9Y4C2|F115A_HUMAN
15695	33	SPFHRNLFL	SPFHRNLFL/2	475.606	B07	9	sp|Q96EX3|WDR34_HUMAN
23172	49	TPDTNHTPVAL	TPDTNHTPVAL/2	472.898	B07	11	sp|Q15653|IKBB_HUMAN
20959	45	GPDNVHVAL	GPDNVHVAL/2	465.756	B07	9	sp|O95347|SMC2_HUMAN
24094	52	LPAPPHIDV	LPAPPHIDV/2	463.346	B07	9	sp|Q09161|NCBP1_HUMAN
26078	57	SPSKTRGQIQV	SPSKTRGQIQV/2	457.509	B07	11	sp|P04183|KITH_HUMAN
25091	56	GPAPVGRFF	GPAPVGRFF/2	448.054	B07	9	sp|Q8TDP1|RNH2C_HUMAN
28104	63	LPKSPPYTAF	LPKSPPYTAF/2	446.095	B07	10	sp|P23588|IF4B_HUMAN
6211	14	LVMAPRTVL	LVM[147]APRTVL/2	443.643	B07	9	sp|P01889|1B07_HUMAN;sp|P30460|1B08_HUMAN;sp|P30462|1B14_HUMAN;sp|Q95365|1B38_HUMAN;sp|P30475|1B39_HUMAN;sp|P30480|1B42_HUMAN;sp|P30486|1B48_HUMAN;sp|Q29836|1B67_HUMAN;sp|Q31612|1B73_HUMAN;sp|Q31610|1B81_HUMAN
21545	49	YPCIPNHEL	YPCIPNHEL/2	439.694	B07	9	sp|Q15326|ZMY11_HUMAN
19291	44	GPAAIALMIL	GPAAIALMIL/2	438.432	B07	10	sp|Q14126|DSG2_HUMAN
16994	39	SPFGKDVRLVSL	SPFGKDVRLVSL/3	435.744	B07	12	sp|A8MPP1|D11L8_HUMAN
24713	57	VPDSSGPERIL	VPDSSGPERIL/2	433.561	B07	11	sp|P61978|HNRPK_HUMAN
26080	62	IPKKHISQI	IPKKHISQI/2	420.645	B07	9	sp|P49773|HINT1_HUMAN
13190	32	LVRPVFGEL	LVRPVFGEL/2	412.188	B07	9	sp|O00506|STK25_HUMAN
29370	72	VPRPPSNPP	VPRPPSNPP/2	407.917	B07	9	sp|O43734|CIKS_HUMAN
25537	69	SPSSKYVKL	SPSSKYVKL/2	370.101	B07	9	sp|Q9H3F6|BACD3_HUMAN
26703	74	TPNKKNKITM	TPNKKNKITM[147]/3	360.851	B07	10	sp|Q15029|U5S1_HUMAN
20745	61	KVRPSTGNSA	KVRPSTGNSA/2	340.082	B07	10	sp|Q9UJX3|APC7_HUMAN
16355	50	MPSPVSPKL	M[147]PSPVSPKL/2	327.1	B07	9	sp|Q9UHB7|AFF4_HUMAN
27778	89	RPKLPEDPLL	RPKLPEDPLL/2	312.112	B07	10	sp|P49327|FAS_HUMAN
4645	15	RVRFFFPSL	RVRFFFPSL/3	309.667	B07	9	sp|P43355|MAGA1_HUMAN
30091	104	SPESLRSKV	SPESLRSKV/2	289.337	B07	9	sp|Q13310|PABP4_HUMAN
24793	86	QVRLPLGTL	QVRLPLGTL/2	288.291	B07	9	sp|O43148|MCES_HUMAN
27298	96	APSDLRTIQTF	APSDLRTIQTF/2	284.354	B07	11	sp|Q9BUL5|PHF23_HUMAN
17467	62	AAAAGRLDL	AAAAGRLDL/2	281.726	B07	9	sp|Q9UPU5|UBP24_HUMAN
26948	101	RPAETNLRHTC	RPAETNLRHTC/3	266.812	B07	11	sp|P15104|GLNA_HUMAN
26550	101	MPKMDQDSL	MPKM[147]DQDSL/2	262.871	B07	9	sp|P37268|FDFT_HUMAN
23738	93	APPEYHRKAV	APPEYHRKAV/3	255.247	B07	10	sp|Q9UBU8|MO4L1_HUMAN
2805	11	YPYPYPHTL	YPYPYPHTL/2	255	B07	9	sp|Q9BZE1|RM37_HUMAN
12940	52	IPSEWHIEL	IPSEWHIEL/2	248.846	B07	9	sp|Q9H583|HEAT1_HUMAN
26189	110	APKSQIVML	APKSQIVM[147]L/2	238.082	B07	9	sp|Q8TCS8|PNPT1_HUMAN
22118	98	IARNLTQQL	IARNLTQQL/2	225.694	B07	9	sp|Q99541|PLIN2_HUMAN
28188	128	TPNEERNVM	TPNEERNVM[147]/2	220.219	B07	9	sp|P35606|COPB2_HUMAN
28392	129	GPEAGRKPA	GPEAGRKPA/2	220.093	B07	9	sp|P48634|PRC2A_HUMAN
19402	91	LPSLRILYM	LPSLRILYM[147]/2	213.209	B07	9	sp|P00403|COX2_HUMAN
19670	93	APSPVIPRL	APSPVIPRL/2	211.505	B07	9	sp|Q5VWG9|TAF3_HUMAN
29307	140	RPPLEEKKAL	RPPLEEKKAL/3	209.336	B07	10	sp|Q9HB19|PKHA2_HUMAN
30396	146	SPNPARGHSVC	SPNPARGHSVC/3	208.192	B07	11	sp|P01106|MYC_HUMAN
12899	63	AARAIISEL	AARAIISEL/2	204.746	B07	9	sp|P78344|IF4G2_HUMAN
22593	114	SARPAGDSV	SARPAGDSV/2	198.184	B07	9	sp|P54198|HIRA_HUMAN
21734	110	SPNAEIHIL	SPNAEIHIL/2	197.582	B07	9	sp|Q14807|KIF22_HUMAN
7572	39	RPFPFLMGL	RPFPFLM[147]GL/2	194.154	B07	9	sp|Q13342|SP140_HUMAN
26192	136	LPEGPPAI	LPEGPPAI/2	192.588	B07	8	sp|Q15011|HERP1_HUMAN
27004	147	GPGTNRTTV	GPGTNRTTV/2	183.701	B07	9	sp|Q9UMY1|NOL7_HUMAN
21035	118	QVRVGGSSV	QVRVGGSSV/2	178.263	B07	9	sp|O60716|CTND1_HUMAN
4715	27	FPIEVRHYL	FPIEVRHYL/3	174.63	B07	9	sp|P42229|STA5A_HUMAN
1906	11	RVMAPRALL	RVMAPRALL/2	173.273	B07	9	sp|P10321|1C07_HUMAN;sp|Q29865|1C18_HUMAN
26956	159	TPNDGRCHL	TPNDGRCHL/2	169.535	B07	9	sp|P05107|ITB2_HUMAN
22953	136	APEEHPVLL	APEEHPVLL/2	168.772	B07	9	sp|P60709|ACTB_HUMAN
28715	176	TPRHIIVRF	TPRHIIVRF/3	163.153	B07	9	sp|Q9UN81|LORF1_HUMAN
21600	137	QIRSSTTSM	QIRSSTTSM[147]/2	157.664	B07	9	sp|Q13200|PSMD2_HUMAN
3242	22	AVREAIHAL	AVREAIHAL/2	147.364	B07	9	sp|Q9Y4R8|TELO2_HUMAN
18898	134	IPDASKLQFIL	IPDASKLQFIL/2	141.03	B07	11	sp|O75935|DCTN3_HUMAN
28188	209	RPRPNTFVIR	RPRPNTFVIR/3	134.871	B07	10	sp|P31751|AKT2_HUMAN
21138	162	RPGAERAIIHV	RPGAERAIIHV/3	130.481	B07	11	sp|Q96HA7|TONSL_HUMAN
2191	17	KVRAHLAEL	KVRAHLAEL/2	128.882	B07	9	sp|B0I1T2|MYO1G_HUMAN
2830	22	RVMIIRTML	RVM[147]IIRTM[147]L/3	128.636	B07	9	sp|Q9Y265|RUVB1_HUMAN
4061	36	LVRDVVSSL	LVRDVVSSL/2	112.806	B07	9	sp|Q9NQ55|SSF1_HUMAN
24401	259	APCNNRLYI	APCNNRLYI/2	94.212	B07	9	sp|Q8WZ60|KLHL6_HUMAN
8455	96	KAASVRPVL	KAASVRPVL/2	88.073	B07	9	sp|Q9H269|VPS16_HUMAN
25694	299	KPKPAGVLGA	KPKPAGVLGA/2	85.933	B07	10	sp|Q29RF7|PDS5A_HUMAN
6439	75	RLRPPIMIM	RLRPPIMIM[147]/3	85.853	B07	9	sp|Q16850|CP51A_HUMAN
29389	360	APQGSRAAP	APQGSRAAP/2	81.636	B07	9	sp|Q9BRP8|WIBG_HUMAN
2009	26	AVAPVASAL	AVAPVASAL/2	77.269	B07	9	sp|P56270|MAZ_HUMAN
18621	245	AASKERSGVSL	AASKERSGVSL/2	76.004	B07	11	sp|P16403|H12_HUMAN
26108	357	TPAQIEEEL	TPAQIEEEL/2	73.132	B07	9	reverse_sp|Q8N7H5|PAF1_HUMAN
30112	417	QPKAKAKEL	QPKAKAKEL/2	72.211	B07	9	sp|Q14008|CKAP5_HUMAN
18386	256	AAVRIGSVL	AAVRIGSVL/2	71.82	B07	9	sp|Q9Y5B0|CTDP1_HUMAN
13692	193	RVADFGSATF	RVADFGSATF/2	70.943	B07	10	sp|P49761|CLK3_HUMAN
27180	387	QPNPLPLRL	QPNPLPLRL/2	70.233	B07	9	sp|Q15154|PCM1_HUMAN
18436	264	RVKEIGSTM	RVKEIGSTM[147]/2	69.833	B07	9	sp|O00422|SAP18_HUMAN
22794	385	IPDAKHVFTTF	IPDAKHVFTTF/2	59.205	B07	11	sp|Q9BUB7|TMM70_HUMAN
28146	493	PPLVSSTL	PPLVSSTL/2	57.091	B07	8	sp|Q9NP71|MLXPL_HUMAN
10980	222	SINAQRNAL	SINAQRNAL/2	49.459	B07	9	sp|Q14669|TRIPC_HUMAN
18214	376	VAKAVTQAL	VAKAVTQAL/2	48.441	B07	9	sp|Q9Y490|TLN1_HUMAN
2456	69	MVRRFLVTL	MVRRFLVTL/3	35.594	B07	9	sp|Q8N726|CD2A2_HUMAN
25710	729	SVKPASSSF	SVKPASSSF/2	35.267	B07	9	sp|Q9Y4W2|LAS1L_HUMAN
18709	560	VPFERPAVI	VPFERPAVI/2	33.409	B07	9	sp|Q9UKS7|IKZF2_HUMAN
2629	87	AVILRALSL	AVILRALSL/2	30.218	B07	9	sp|P20036|DPA1_HUMAN
1594	59	KIRPHIATL	KIRPHIATL/2	27.017	B07	9	sp|Q14671|PUM1_HUMAN
29958	1292	APRPASGPIRP	APRPASGPIRP/3	23.187	B07	11	sp|P26373|RL13_HUMAN
5391	237	KIRKTIMQL	KIRKTIMQL/2	22.747	B07	9	sp|P19388|RPAB1_HUMAN
27183	1264	RPRADVVVVR	RPRADVVVVR/3	21.506	B07	10	sp|Q86VY9|T200A_HUMAN
19108	1047	SASVQRADTSL	SASVQRADTSL/2	18.25	B07	11	sp|O76080|ZFAN5_HUMAN
11537	647	RIHVPWTKL	RIHVPWTKL/3	17.832	B07	9	sp|Q7Z7G8|VP13B_HUMAN
356	25	RVAEHHVATL	RVAEHHVATL/3	14.24	B07	10	sp|Q12834|CDC20_HUMAN
19713	1894	RIRDVINVF	RIRDVINVF/3	10.408	B07	9	sp|Q9UK58|CCNL1_HUMAN
7424	750	GVDLSTRPL	GVDLSTRPL/2	9.899	B07	9	reverse_sp|Q8IXR5|F178B_HUMAN
10938	1140	AANPNRFITL	AANPNRFITL/2	9.595	B07	10	sp|Q9Y4A5|TRRAP_HUMAN
18239	1935	LPPDALVGL	LPPDALVGL/2	9.426	B07	9	sp|Q15437|SC23B_HUMAN
28109	3119	VPRAAFLSPLLP	VPRAAFLSPLLP/2	9.012	B07	12	sp|P30040|ERP29_HUMAN
4386	561	RVDPNGSRYLL	RVDPNGSRYLL/3	7.818	B07	11	sp|Q16531|DDB1_HUMAN
15237	2352	LVKSTSQL	LVKSTSQL/2	6.478	B07	8	sp|Q06055|AT5G2_HUMAN
18065	3603	AANSERSQTTL	AANSERSQTTL/2	5.014	B07	11	sp|Q8N4T4|ARG39_HUMAN
20422	4122	KIRNFVVVF	KIRNFVVVF/2	4.954	B07	9	sp|Q9BYX4|IFIH1_HUMAN
6083	1349	IVDGNHRLTL	IVDGNHRLTL/3	4.509	B07	10	sp|Q01082|SPTB2_HUMAN
28543	6684	APSSPRPALP	APSSPRPALP/2	4.27	B07	10	sp|P05362|ICAM1_HUMAN
27100	6910	RPSLLPLH	RPSLLPLH/2	3.922	B07	8	sp|Q9NYL4|FKB11_HUMAN

## Sheet: DDA_n=3
Figure 1-source data 1. Comparative analysis of DDA and SWATH-MS for the identification of HLA class I peptides. List of JY HLA-A and -B peptides that were identified by DDA (n=3) and then annotated using the computational workflow (1% pep-level FDR).
NetMHC (IC50; nM)
A02	B07	Peptide	Peptide_mod_ion	factor	Allele	Length	Protein
1	18187	FLMDFIHQV	FLM[147]DFIHQV/2	18187	A02	9	sp|Q8WUM0|NU133_HUMAN
2	22167	GLLGYLHFV	GLLGYLHFV/2	11083.5	A02	9	sp|Q14442|PIGH_HUMAN
2	21860	FLNDEVWNL	FLNDEVWNL/2	10930	A02	9	sp|O95825|QORL1_HUMAN
2	21357	FLFDTQHFI	FLFDTQHFI/2	10678.5	A02	9	sp|Q9H583|HEAT1_HUMAN
2	20634	ILVDWLVEV	ILVDWLVEV/2	10317	A02	9	sp|P78396|CCNA1_HUMAN
2	20500	FLFDGSPTYV	FLFDGSPTYV/2	10250	A02	10	sp|P49327|FAS_HUMAN
2	20489	ILIDWLVQV	ILIDWLVQV/2	10244.5	A02	9	sp|P14635|CCNB1_HUMAN
2	20327	VLLGHIFYV	VLLGHIFYV/2	10163.5	A02	9	sp|Q9Y6X3|SCC4_HUMAN
2	20287	ILIDWLVEV	ILIDWLVEV/2	10143.5	A02	9	sp|P41002|CCNF_HUMAN
2	20046	SIIEFIFGV	SIIEFIFGV/2	10023	A02	9	sp|Q8WU17|RN139_HUMAN
2	19713	FLLGSVVHEV	FLLGSVVHEV/2	9856.5	A02	10	sp|Q9C0B7|TNG6_HUMAN
2	19369	LLIDIIHFL	LLIDIIHFL/2	9684.5	A02	9	sp|Q86VV8|RTTN_HUMAN
2	18091	SLFEGTWYL	SLFEGTWYL/2	9045.5	A02	9	sp|Q01581|HMCS1_HUMAN
2	17989	YLADLYHFV	YLADLYHFV/2	8994.5	A02	9	sp|Q9Y3L3|3BP1_HUMAN
2	17887	FLHEVLWEL	FLHEVLWEL/2	8943.5	A02	9	sp|Q7Z333|SETX_HUMAN
2	17734	RLYDGLFKV	RLYDGLFKV/3	8867	A02	9	sp|Q16531|DDB1_HUMAN
2	17616	FLIPFVITV	FLIPFVITV/2	8808	A02	9	sp|Q86VZ1|P2RY8_HUMAN
2	16892	YLLDMPLWYL	YLLDM[147]PLWYL/2	8446	A02	10	sp|P11388|TOP2A_HUMAN
2	16814	KLLDSMHEV	KLLDSM[147]HEV/2	8407	A02	9	sp|P04150|GCR_HUMAN
2	16810	MLIGEIFEL	M[147]LIGEIFEL/2	8405	A02	9	sp|Q7Z3C6|ATG9A_HUMAN
2	16751	YMIDNVILL	YM[147]IDNVILL/2	8375.5	A02	9	sp|P61421|VA0D1_HUMAN
2	16672	YLWDLDHGFAGV	YLWDLDHGFAGV/2	8336	A02	12	sp|P47756|CAPZB_HUMAN
2	16232	YLNDLIHSV	YLNDLIHSV/2	8116	A02	9	sp|O43572|AKA10_HUMAN
2	16054	LLWDYVYQL	LLWDYVYQL/2	8027	A02	9	sp|Q9Y603|ETV7_HUMAN
1	8017	KLMDHIYAV	KLM[147]DHIYAV/2	8017	A02	9	sp|Q9UP83|COG5_HUMAN
3	22534	GLYELVWRV	GLYELVWRV/2	7511.33	A02	9	sp|Q96E22|NGBR_HUMAN
2	15007	FLFDHLLTL	FLFDHLLTL/2	7503.5	A02	9	sp|Q7L2H7|EIF3M_HUMAN
3	22254	GLIDEIYGI	GLIDEIYGI/2	7418	A02	9	sp|Q96AX1|VP33A_HUMAN
3	22022	VLSELLWQV	VLSELLWQV/2	7340.67	A02	9	sp|Q93008|USP9X_HUMAN
3	21758	FLTEFINYI	FLTEFINYI/2	7252.67	A02	9	sp|Q96HY6|DDRGK_HUMAN
3	21658	LMDHTIPEV	LMDHTIPEV/2	7219.33	A02	9	sp|O00560|SDCB1_HUMAN
3	21597	LLLEAVWHL	LLLEAVWHL/2	7199	A02	9	sp|O15360|FANCA_HUMAN
3	21482	NLLDLLTEV	NLLDLLTEV/2	7160.67	A02	9	sp|Q9H3U1|UN45A_HUMAN
3	21472	FMFDEKLVTV	FM[147]FDEKLVTV/2	7157.33	A02	10	sp|O00743|PPP6_HUMAN
3	21442	FLFDRPMHV	FLFDRPM[147]HV/2	7147.33	A02	9	sp|Q9P2K5|MYEF2_HUMAN
3	21426	TLADVLYHV	TLADVLYHV/2	7142	A02	9	sp|Q9UBL3|ASH2L_HUMAN
3	21395	FLYSETWNI	FLYSETWNI/2	7131.67	A02	9	sp|P00156|CYB_HUMAN
3	21382	FLFDKLLLI	FLFDKLLLI/2	7127.33	A02	9	sp|Q9ULL1|PKHG1_HUMAN
3	21364	YLLQEIYGI	YLLQEIYGI/2	7121.33	A02	9	sp|O60291|MGRN1_HUMAN
3	21026	TLAGLIPFV	TLAGLIPFV/2	7008.67	A02	9	sp|Q5SWH9|TMM69_HUMAN
3	21005	ALVDWLYKV	ALVDWLYKV/2	7001.67	A02	9	sp|Q9UPN3|MACF1_HUMAN
3	20756	LLNDHIYVV	LLNDHIYVV/2	6918.67	A02	9	sp|Q53G59|KLH12_HUMAN
3	20668	ILVDWLVQV	ILVDWLVQV/2	6889.33	A02	9	sp|O95067|CCNB2_HUMAN
3	20246	YLFDLPLKV	YLFDLPLKV/2	6748.67	A02	9	sp|Q5VUJ6|LRCH2_HUMAN
3	20196	KLFPFYFHI	KLFPFYFHI/3	6732	A02	9	sp|Q6UW68|TM205_HUMAN
3	20096	VLIKWFPEV	VLIKWFPEV/2	6698.67	A02	9	sp|Q9HBH0|RHOF_HUMAN
3	20026	KLLFWVTEV	KLLFWVTEV/2	6675.33	A02	9	sp|Q8NFH4|NUP37_HUMAN
2	13322	ILMEHIHKL	ILMEHIHKL/2	6661	A02	9	sp|P84098|RL19_HUMAN
3	19867	FLEKLLPPV	FLEKLLPPV/2	6622.33	A02	9	sp|O95372|LYPA2_HUMAN
3	19786	LMVDHVTEV	LM[147]VDHVTEV/2	6595.33	A02	9	sp|Q9HD15|SRA1_HUMAN
3	19735	FLFPVYPLI	FLFPVYPLI/2	6578.33	A02	9	sp|Q9H6U8|ALG9_HUMAN
3	19635	FIFDVHVHEV	FIFDVHVHEV/3	6545	A02	10	sp|O15031|PLXB2_HUMAN
3	19604	FLDKQGFYV	FLDKQGFYV/2	6534.67	A02	9	sp|Q9UBC2|EP15R_HUMAN
2	13010	RLMEPIYLV	RLM[147]EPIYLV/2	6505	A02	9	sp|P13639|EF2_HUMAN
3	19460	ILLPSVFGV	ILLPSVFGV/2	6486.67	A02	9	sp|Q53EU6|GPAT3_HUMAN
3	19373	RQIEYYFSV	RQIEYYFSV/2	6457.67	A02	9	sp|Q659C4|LAR1B_HUMAN
3	19338	YLDNGVVFV	YLDNGVVFV/2	6446	A02	9	sp|Q16531|DDB1_HUMAN
3	19302	FLDHIIASV	FLDHIIASV/2	6434	A02	9	sp|Q7LBC6|KDM3B_HUMAN
3	19168	NLFEWHFTV	NLFEWHFTV/2	6389.33	A02	9	sp|Q9Y385|UB2J1_HUMAN
3	19015	FLLPKFHGV	FLLPKFHGV/2	6338.33	A02	9	sp|P78527|PRKDC_HUMAN
3	18411	KLIEKNYFL	KLIEKNYFL/3	6137	A02	9	sp|Q9NVP1|DDX18_HUMAN
3	18304	YMIDNVILLI	YM[147]IDNVILLI/2	6101.33	A02	10	sp|P61421|VA0D1_HUMAN
3	18156	ALLPYFVYV	ALLPYFVYV/2	6052	A02	9	sp|Q9Y6J9|TAF6L_HUMAN
3	18139	MLNEHDFEV	M[147]LNEHDFEV/2	6046.33	A02	9	sp|P38398|BRCA1_HUMAN
3	18131	YLNDGLWHM	YLNDGLWHM[147]/2	6043.67	A02	9	sp|Q9ULC4|MCTS1_HUMAN
3	17976	KLWELLYKL	KLWELLYKL/2	5992	A02	9	sp|Q96RV3|PCX1_HUMAN
3	17869	YLDASLITV	YLDASLITV/2	5956.33	A02	9	sp|Q14562|DHX8_HUMAN
3	17800	KMLEKLPEL	KM[147]LEKLPEL/2	5933.33	A02	9	sp|Q9NUQ8|ABCF3_HUMAN
2	11610	YLFPGIPEL	YLFPGIPEL/2	5805	A02	9	sp|Q8NFF5|FAD1_HUMAN
3	17290	FLSPLLPLL	FLSPLLPLL/2	5763.33	A02	9	sp|P30040|ERP29_HUMAN
4	22832	FLPSYIIDV	FLPSYIIDV/2	5708	A02	9	sp|Q10570|CPSF1_HUMAN
3	17107	KLLDILSYL	KLLDILSYL/2	5702.33	A02	9	sp|O15091|MRRP3_HUMAN
3	17090	ALLDWVTSV	ALLDWVTSV/2	5696.67	A02	9	sp|Q9UPN3|MACF1_HUMAN
3	17026	YLYKYLWRL	YLYKYLWRL/3	5675.33	A02	9	sp|O75691|UTP20_HUMAN
3	16958	ALNDCIYSV	ALNDCIYSV/2	5652.67	A02	9	sp|Q9Y573|IPP_HUMAN
2	11244	FLFDGSPTYVL	FLFDGSPTYVL/2	5622	A02	11	sp|P49327|FAS_HUMAN
3	16837	YLNTRLFTV	YLNTRLFTV/2	5612.33	A02	9	sp|Q9C0B1|FTO_HUMAN
4	22394	YLPEDFIRV	YLPEDFIRV/2	5598.5	A02	9	sp|O43187|IRAK2_HUMAN
3	16741	SLYDYNPNL	SLYDYNPNL/2	5580.33	A02	9	sp|Q99613|EIF3C_HUMAN
4	22313	GLWEEAYRV	GLWEEAYRV/2	5578.25	A02	9	sp|Q9UG01|IF172_HUMAN
3	16573	KLLDVVHPA	KLLDVVHPA/2	5524.33	A02	9	sp|Q99832|TCPH_HUMAN
4	22093	VLDDKLVFV	VLDDKLVFV/2	5523.25	A02	9	sp|Q4KMQ2|ANO6_HUMAN
3	16544	KLLDLMPRL	KLLDLM[147]PRL/2	5514.67	A02	9	sp|Q96HW7|INT4_HUMAN
4	21768	FLLDKKIGV	FLLDKKIGV/2	5442	A02	9	sp|P78371|TCPB_HUMAN
4	21737	TLIEDILGV	TLIEDILGV/2	5434.25	A02	9	sp|Q8TEL6|TP4AP_HUMAN
3	16296	KIVDFSYSV	KIVDFSYSV/2	5432	A02	9	sp|O60566|BUB1B_HUMAN
3	16283	LLMEHIQEI	LLM[147]EHIQEI/2	5427.67	A02	9	sp|Q96SN8|CK5P2_HUMAN
4	21689	LLLEILHEI	LLLEILHEI/2	5422.25	A02	9	sp|Q96HE7|ERO1A_HUMAN
3	16220	YLDGHLITTV	YLDGHLITTV/2	5406.67	A02	10	sp|O95544|NADK_HUMAN
3	16182	FLINFIHTL	FLINFIHTL/2	5394	A02	9	sp|O15031|PLXB2_HUMAN
4	21420	LLVSGFWGV	LLVSGFWGV/2	5355	A02	9	sp|Q9UBM7|DHCR7_HUMAN
3	16007	LMISRTPEV	LM[147]ISRTPEV/2	5335.67	A02	9	sp|P01857|IGHG1_HUMAN
3	15919	YLDPSVLSGV	YLDPSVLSGV/2	5306.33	A02	10	sp|Q15041|AR6P1_HUMAN
3	15913	RLLPVIFLV	RLLPVIFLV/2	5304.33	A02	9	sp|Q6P4A7|SFXN4_HUMAN
4	21207	YLDRFLAGV	YLDRFLAGV/2	5301.75	A02	9	sp|P30279|CCND2_HUMAN
4	20982	FLLPLLIEKV	FLLPLLIEKV/2	5245.5	A02	10	sp|Q96T76|MMS19_HUMAN
2	10491	ALWGFFPV	ALWGFFPV/2	5245.5	A02	8	sp|Q9NPA0|EMC7_HUMAN
3	15649	YLTDRVMTV	YLTDRVM[147]TV/2	5216.33	A02	9	sp|O15379|HDAC3_HUMAN
4	20826	TLADLVHHV	TLADLVHHV/2	5206.5	A02	9	sp|Q9Y4A5|TRRAP_HUMAN
4	20790	TLYDIAHTPGV	TLYDIAHTPGV/2	5197.5	A02	11	sp|P40926|MDHM_HUMAN
4	20720	LLFDSVIHL	LLFDSVIHL/2	5180	A02	9	sp|Q9BZM1|PG12A_HUMAN
3	15462	FMLKDMLYL	FM[147]LKDM[147]LYL/2	5154	A02	9	sp|Q53EQ6|TIGD5_HUMAN
3	15424	FLSDGTIISV	FLSDGTIISV/2	5141.33	A02	10	sp|Q969X6|CIR1A_HUMAN
3	15208	YLDPRLAFTV	YLDPRLAFTV/2	5069.33	A02	10	sp|Q9NZC7|WWOX_HUMAN
4	20149	SLLDPVPEV	SLLDPVPEV/2	5037.25	A02	9	sp|Q92616|GCN1L_HUMAN
4	20134	GLIGGLFTYV	GLIGGLFTYV/2	5033.5	A02	10	sp|Q9BV81|EMC6_HUMAN
3	15078	YVYEYLLHV	YVYEYLLHV/2	5026	A02	9	sp|P81877|SSBP2_HUMAN
3	14956	WLVDHVYAI	WLVDHVYAI/2	4985.33	A02	9	sp|P30153|2AAA_HUMAN
4	19705	ILDEVIFKL	ILDEVIFKL/2	4926.25	A02	9	sp|Q15051|IQCB1_HUMAN
4	19673	GLLDCPIFL	GLLDCPIFL/2	4918.25	A02	9	sp|Q9BXW9|FACD2_HUMAN
4	19612	FLMNEVIKL	FLM[147]NEVIKL/2	4903	A02	9	sp|Q9BXL7|CAR11_HUMAN
4	19595	ALITRIFGV	ALITRIFGV/2	4898.75	A02	9	sp|Q6YHU6|THADA_HUMAN
4	19464	GLLDAVTYL	GLLDAVTYL/2	4866	A02	9	sp|Q9UP65|PA24C_HUMAN
4	19461	SLIDADPYL	SLIDADPYL/2	4865.25	A02	9	sp|P20248|CCNA2_HUMAN
4	19387	GLADKVYFL	GLADKVYFL/2	4846.75	A02	9	sp|P27708|PYR1_HUMAN
4	19317	ALFEEVPEL	ALFEEVPEL/2	4829.25	A02	9	sp|P31939|PUR9_HUMAN
2	9566	SLMDHTIPEV	SLM[147]DHTIPEV/2	4783	A02	10	sp|O00560|SDCB1_HUMAN
3	14336	FLLKLTPLL	FLLKLTPLL/2	4778.67	A02	9	sp|O75448|MED24_HUMAN
4	19075	SLLRSIFTV	SLLRSIFTV/2	4768.75	A02	9	sp|Q92830|KAT2A_HUMAN
4	18956	RLLEGYEIYV	RLLEGYEIYV/2	4739	A02	10	sp|Q14676|MDC1_HUMAN
2	9473	YMIAHITGL	YM[147]IAHITGL/2	4736.5	A02	9	sp|P04818|TYSY_HUMAN
3	14181	FMNPHLISV	FM[147]NPHLISV/2	4727	A02	9	sp|Q9UG01|IF172_HUMAN
4	18889	KIIDFIYTA	KIIDFIYTA/2	4722.25	A02	9	sp|Q9P2N7|KLH13_HUMAN
3	14055	RLLDYVATV	RLLDYVATV/2	4685	A02	9	sp|Q9NR09|BIRC6_HUMAN
4	18720	FLDHVMYTI	FLDHVM[147]YTI/2	4680	A02	9	sp|Q13422|IKZF1_HUMAN
4	18678	FLLDGFPRTV	FLLDGFPRTV/2	4669.5	A02	10	sp|P54819|KAD2_HUMAN
4	18636	KLWSETFDV	KLWSETFDV/2	4659	A02	9	sp|Q9NR81|ARHG3_HUMAN
3	13967	FMIDASVHPTL	FM[147]IDASVHPTL/2	4655.67	A02	11	sp|P86791|CCZ1_HUMAN
5	23026	SLLDIIEKV	SLLDIIEKV/2	4605.2	A02	9	sp|P49815|TSC2_HUMAN
4	18402	AMFPDTIPRV	AM[147]FPDTIPRV/2	4600.5	A02	10	sp|Q9UF33|EPHA6_HUMAN
5	22924	KLLDISELDMV	KLLDISELDM[147]V/2	4584.8	A02	11	sp|Q9H3P2|NELFA_HUMAN
3	13592	KLYDGFQYL	KLYDGFQYL/2	4530.67	A02	9	sp|Q9UBF8|PI4KB_HUMAN
3	13574	FLWDVPSNWTL	FLWDVPSNWTL/2	4524.67	A02	11	sp|P49327|FAS_HUMAN
3	13485	FLWDEGFHQL	FLWDEGFHQL/2	4495	A02	10	sp|Q13724|MOGS_HUMAN
4	17919	KLIGQVHEV	KLIGQVHEV/2	4479.75	A02	9	sp|Q5TBA9|FRY_HUMAN
4	17914	FLLPPVFNI	FLLPPVFNI/2	4478.5	A02	9	sp|P17181|INAR1_HUMAN
4	17896	RLLDYVVNI	RLLDYVVNI/2	4474	A02	9	sp|Q63ZY3|KANK2_HUMAN
4	17867	YLAHFIEGL	YLAHFIEGL/2	4466.75	A02	9	sp|Q9C0E2|XPO4_HUMAN
4	17863	YLHDFLKYL	YLHDFLKYL/2	4465.75	A02	9	sp|Q15014|MO4L2_HUMAN
4	17862	YLLPAIVHI	YLLPAIVHI/2	4465.5	A02	9	sp|Q92841|DDX17_HUMAN
5	22265	GLTEALHFV	GLTEALHFV/2	4453	A02	9	sp|P07199|CENPB_HUMAN
4	17802	FLIAQLPKL	FLIAQLPKL/2	4450.5	A02	9	sp|Q12768|STRUM_HUMAN
4	17794	VLFDVSIMAV	VLFDVSIM[147]AV/2	4448.5	A02	10	sp|Q9BV38|WDR18_HUMAN
4	17781	FLFRDILEL	FLFRDILEL/2	4445.25	A02	9	sp|Q9NRR4|RNC_HUMAN
4	17717	FLAEDALNTV	FLAEDALNTV/2	4429.25	A02	10	sp|Q08345|DDR1_HUMAN
4	17708	SIIDWLNSV	SIIDWLNSV/2	4427	A02	9	sp|Q9NVW2|RNF12_HUMAN
5	22090	GQIEVVPEV	GQIEVVPEV/2	4418	A02	9	sp|Q92576|PHF3_HUMAN
4	17543	VLIEGSINSV	VLIEGSINSV/2	4385.75	A02	10	sp|P59998|ARPC4_HUMAN
4	17531	KLLDEAIQAV	KLLDEAIQAV/2	4382.75	A02	10	sp|Q96QK1|VPS35_HUMAN
5	21720	KLLNKIYEA	KLLNKIYEA/2	4344	A02	9	sp|O60287|NPA1P_HUMAN
5	21605	SLFQGVEFHYV	SLFQGVEFHYV/2	4321	A02	11	sp|Q14739|LBR_HUMAN
4	17216	YMAELIERL	YM[147]AELIERL/2	4304	A02	9	sp|O75496|GEMI_HUMAN
5	21340	SLLDEFYKL	SLLDEFYKL/2	4268	A02	9	sp|Q14444|CAPR1_HUMAN
5	21338	YLNQHIEHV	YLNQHIEHV/2	4267.6	A02	9	sp|P28715|ERCC5_HUMAN
3	12763	SLLDCTFRL	SLLDCTFRL/2	4254.33	A02	9	sp|O60244|MED14_HUMAN
5	21218	FLGIHVFLV	FLGIHVFLV/2	4243.6	A02	9	sp|Q9Y679|AUP1_HUMAN
5	21214	KVIDEIYRV	KVIDEIYRV/3	4242.8	A02	9	sp|Q9NVF7|FBX28_HUMAN
4	16873	YLLESVNKL	YLLESVNKL/2	4218.25	A02	9	sp|P05120|PAI2_HUMAN
3	12639	YLLEKFVAV	YLLEKFVAV/2	4213	A02	9	sp|A8MPP1|D11L8_HUMAN
5	21042	FLPPSFPIV	FLPPSFPIV/2	4208.4	A02	9	sp|Q9HAU8|RNPL1_HUMAN
5	20881	VLIRDLNFEV	VLIRDLNFEV/2	4176.2	A02	10	sp|P28288|ABCD3_HUMAN
2	8337	VLMPWIHEL	VLM[147]PWIHEL/2	4168.5	A02	9	sp|Q9C000|NALP1_HUMAN
4	16657	ILLDRLLYL	ILLDRLLYL/2	4164.25	A02	9	sp|Q96FB5|RRNAD_HUMAN
5	20811	SLPDFGISYV	SLPDFGISYV/2	4162.2	A02	10	sp|Q86UX7|URP2_HUMAN
4	16642	FVDDYTVRV	FVDDYTVRV/2	4160.5	A02	9	sp|O00487|PSDE_HUMAN
4	16571	KLLDLSDSTSV	KLLDLSDSTSV/2	4142.75	A02	11	sp|Q13464|ROCK1_HUMAN
4	16544	RLFDQAFGL	RLFDQAFGL/2	4136	A02	9	sp|P04792|HSPB1_HUMAN
4	16367	YLFPGIPELL	YLFPGIPELL/2	4091.75	A02	10	sp|Q8NFF5|FAD1_HUMAN
4	16306	VLADQVWTL	VLADQVWTL/2	4076.5	A02	9	sp|O15527|OGG1_HUMAN
5	20343	LLLDKLILL	LLLDKLILL/2	4068.6	A02	9	sp|Q96N67|DOCK7_HUMAN
5	20321	FLNKEITSV	FLNKEITSV/2	4064.2	A02	9	sp|Q9UI10|EI2BD_HUMAN
4	16245	FVLPELPSV	FVLPELPSV/2	4061.25	A02	9	sp|P53990|IST1_HUMAN
4	16211	ALWDKLFNL	ALWDKLFNL/2	4052.75	A02	9	sp|Q8WXH0|SYNE2_HUMAN
4	16197	SLFNGSHYL	SLFNGSHYL/2	4049.25	A02	9	sp|P54277|PMS1_HUMAN
4	16185	MLFGHPLLVSV	M[147]LFGHPLLVSV/2	4046.25	A02	11	sp|P51784|UBP11_HUMAN
4	16089	ILVDTVWAL	ILVDTVWAL/2	4022.25	A02	9	sp|O00629|IMA3_HUMAN
5	20087	SLIDIVTEI	SLIDIVTEI/2	4017.4	A02	9	sp|Q9UHH9|IP6K2_HUMAN
5	20047	LLLPDYYLVTV	LLLPDYYLVTV/2	4009.4	A02	11	sp|Q7KZF4|SND1_HUMAN
5	20012	LLFDHLEPIEL	LLFDHLEPIEL/2	4002.4	A02	11	sp|Q8IV61|GRP3_HUMAN
5	19979	KVLEYVIKV	KVLEYVIKV/2	3995.8	A02	9	sp|P43355|MAGA1_HUMAN
5	19954	NMVDIIHSV	NMVDIIHSV/2	3990.8	A02	9	sp|P05166|PCCB_HUMAN
5	19932	FLIGILLREV	FLIGILLREV/2	3986.4	A02	10	sp|Q96BY6|DOC10_HUMAN
5	19862	YIFEEPFTI	YIFEEPFTI/2	3972.4	A02	9	sp|P08237|PFKAM_HUMAN
5	19746	KLVELPYTV	KLVELPYTV/2	3949.2	A02	9	sp|Q9NPF4|OSGEP_HUMAN
5	19709	YISEENFRV	YISEENFRV/2	3941.8	A02	9	sp|P52732|KIF11_HUMAN
5	19693	KLWEFFQVDV	KLWEFFQVDV/2	3938.6	A02	10	sp|P35573|GDE_HUMAN
5	19536	FLMKNSDLYGA	FLM[147]KNSDLYGA/2	3907.2	A02	11	sp|Q8NEM2|SHCBP_HUMAN
4	15622	ALLDRIVSV	ALLDRIVSV/2	3905.5	A02	9	sp|Q92621|NU205_HUMAN
6	23409	IMLEALERV	IMLEALERV/2	3901.5	A02	9	sp|A8MWD9|RUXGL_HUMAN;sp|P62308|RUXG_HUMAN
5	19487	KLFGETTLV	KLFGETTLV/2	3897.4	A02	9	sp|P50748|KNTC1_HUMAN
4	15565	SLLPYLPML	SLLPYLPM[147]L/2	3891.25	A02	9	sp|Q9Y4A5|TRRAP_HUMAN
3	11544	VLMGSLVYL	VLM[147]GSLVYL/2	3848	A02	9	sp|Q9H871|RMD5A_HUMAN
4	15305	KLIDLSQVMYL	KLIDLSQVM[147]YL/2	3826.25	A02	11	sp|Q6ZN28|MACC1_HUMAN
5	19067	KLIDLEHLL	KLIDLEHLL/3	3813.4	A02	9	sp|Q8IYW5|RN168_HUMAN
5	18974	NMLPQIFRV	NM[147]LPQIFRV/2	3794.8	A02	9	sp|Q9NQ89|CL004_HUMAN
3	11344	VLWAGTPMV	VLWAGTPM[147]V/2	3781.33	A02	9	sp|O15294|OGT1_HUMAN
4	15026	KLADKLYNL	KLADKLYNL/2	3756.5	A02	9	sp|Q8N4P3|MESH1_HUMAN
4	15008	YMVDKALYL	YM[147]VDKALYL/2	3752	A02	9	sp|Q16206|ENOX2_HUMAN
4	14972	FLQEKSPAV	FLQEKSPAV/2	3743	A02	9	sp|Q14157|UBP2L_HUMAN
6	22311	ALVFELHYV	ALVFELHYV/2	3718.5	A02	9	sp|Q6ZS81|WDFY4_HUMAN
5	18483	HLINYIIFL	HLINYIIFL/2	3696.6	A02	9	sp|Q5BJD5|TM41B_HUMAN
5	18475	SLLDSVVGL	SLLDSVVGL/2	3695	A02	9	sp|Q69YN4|VIR_HUMAN
5	18473	TLIPYYISV	TLIPYYISV/2	3694.6	A02	9	sp|Q13201|MMRN1_HUMAN
5	18379	MMVGDLLEV	M[147]M[147]VGDLLEV/2	3675.8	A02	9	sp|P29375|KDM5A_HUMAN
4	14663	FLWERPTLLV	FLWERPTLLV/2	3665.75	A02	10	sp|Q6IN84|MRM1_HUMAN
5	18318	YLLDQHILI	YLLDQHILI/2	3663.6	A02	9	sp|Q92835|SHIP1_HUMAN
6	21913	ILDEHVQRV	ILDEHVQRV/2	3652.17	A02	9	sp|O15169|AXIN1_HUMAN
5	18237	SLIPIISGV	SLIPIISGV/2	3647.4	A02	9	sp|Q96K37|S35E1_HUMAN
5	18195	KLQEQIFHL	KLQEQIFHL/2	3639	A02	9	sp|Q9NQC1|JADE2_HUMAN
5	18182	FLLPIKTVGV	FLLPIKTVGV/2	3636.4	A02	10	sp|P49915|GUAA_HUMAN
6	21798	KILEDVVGV	KILEDVVGV/2	3633	A02	9	sp|Q9ULW0|TPX2_HUMAN
4	14514	ALMELFPKL	ALM[147]ELFPKL/2	3628.5	A02	9	sp|O75691|UTP20_HUMAN
6	21506	FLNKLVILV	FLNKLVILV/2	3584.33	A02	9	sp|Q92835|SHIP1_HUMAN
5	17649	RLTDYISKV	RLTDYISKV/2	3529.8	A02	9	sp|O75915|PRAF3_HUMAN
5	17641	RLSDAQIYV	RLSDAQIYV/2	3528.2	A02	9	sp|O14879|IFIT3_HUMAN
6	21164	ALQEKLWNV	ALQEKLWNV/2	3527.33	A02	9	sp|Q96HW7|INT4_HUMAN
6	21144	VMITKLVEV	VM[147]ITKLVEV/2	3524	A02	9	sp|Q92729|PTPRU_HUMAN
6	21094	TLSERLWGL	TLSERLWGL/2	3515.67	A02	9	sp|Q9NS69|TOM22_HUMAN
6	20995	VLLGKVYVV	VLLGKVYVV/2	3499.17	A02	9	sp|Q6TFL4|KLH24_HUMAN
4	13912	KLLSKFYEL	KLLSKFYEL/2	3478	A02	9	sp|Q86UV5|UBP48_HUMAN
5	17342	KLQDQIFNL	KLQDQIFNL/2	3468.4	A02	9	sp|O43665|RGS10_HUMAN
6	20806	FLIPAVELI	FLIPAVELI/2	3467.67	A02	9	sp|Q9NVP1|DDX18_HUMAN
6	20780	QLIDKVWQL	QLIDKVWQL/2	3463.33	A02	9	sp|Q92503|S14L1_HUMAN
6	20647	TLLEDGTFKV	TLLEDGTFKV/2	3441.17	A02	10	sp|Q9HBL8|NMRL1_HUMAN
5	17146	FLDSTSPLL	FLDSTSPLL/2	3429.2	A02	9	sp|Q5VYK3|ECM29_HUMAN
6	20269	ALVDQLWKL	ALVDQLWKL/2	3378.17	A02	9	sp|Q6P1X5|TAF2_HUMAN
5	16886	YLTHDSPSV	YLTHDSPSV/2	3377.2	A02	9	sp|P09234|RU1C_HUMAN
6	20223	YLKDLIEEV	YLKDLIEEV/2	3370.5	A02	9	sp|P18848|ATF4_HUMAN
5	16832	HLFDAFVSV	HLFDAFVSV/2	3366.4	A02	9	sp|Q8WUY9|DEP1B_HUMAN
5	16806	FMVDRLESL	FM[147]VDRLESL/2	3361.2	A02	9	sp|Q9NZD8|SPG21_HUMAN
5	16748	SLLDPLWTL	SLLDPLWTL/2	3349.6	A02	9	sp|Q9H3S7|PTN23_HUMAN
6	20092	FIIEKQPPQV	FIIEKQPPQV/2	3348.67	A02	10	sp|P42229|STA5A_HUMAN
7	23154	TLLKKVWKV	TLLKKVWKV/2	3307.71	A02	9	sp|Q8NA72|POC5_HUMAN
4	12961	YLYPDITRL	YLYPDITRL/2	3240.25	A02	9	sp|P31641|SC6A6_HUMAN
6	19436	MLIEVIEKL	M[147]LIEVIEKL/2	3239.33	A02	9	sp|O00203|AP3B1_HUMAN
5	16156	RMIGQICEV	RM[147]IGQICEV/2	3231.2	A02	9	sp|P49815|TSC2_HUMAN
4	12872	YLIDEPSAYL	YLIDEPSAYL/2	3218	A02	10	sp|P61221|ABCE1_HUMAN
7	22373	TMIDFPQMV	TM[147]IDFPQM[147]V/2	3196.14	A02	9	sp|Q9BVS4|RIOK2_HUMAN
6	19147	AIMDIVIKV	AIMDIVIKV/2	3191.17	A02	9	sp|Q9NZJ5|E2AK3_HUMAN
6	19142	YLITSVELL	YLITSVELL/2	3190.33	A02	9	sp|O60488|ACSL4_HUMAN
5	15944	FLVTVIHTL	FLVTVIHTL/2	3188.8	A02	9	sp|O60486|PLXC1_HUMAN
6	19082	KLWDIINVNI	KLWDIINVNI/2	3180.33	A02	10	sp|Q3SXM5|HSDL1_HUMAN
7	22098	VLFEKEVNEV	VLFEKEVNEV/2	3156.86	A02	10	sp|Q9BZQ8|NIBAN_HUMAN
6	18937	SLAQYLINV	SLAQYLINV/2	3156.17	A02	9	sp|Q15366|PCBP2_HUMAN
7	22088	SLFERLVKV	SLFERLVKV/2	3155.43	A02	9	sp|Q9P2E3|ZNFX1_HUMAN
6	18862	LLLPDYYL	LLLPDYYL/2	3143.67	A02	8	sp|Q7KZF4|SND1_HUMAN
5	15712	SIIEYLPTL	SIIEYLPTL/2	3142.4	A02	9	sp|Q96QE3|ATAD5_HUMAN
7	21961	VLSEENFKV	VLSEENFKV/2	3137.29	A02	9	sp|Q7Z2W4|ZCCHV_HUMAN
7	21943	TLWVDPYEV	TLWVDPYEV/2	3134.71	A02	9	sp|P62324|BTG1_HUMAN
6	18798	ILMGVLKEV	ILM[147]GVLKEV/2	3133	A02	9	sp|O43143|DHX15_HUMAN
5	15593	YLFKCPQSV	YLFKCPQSV/2	3118.6	A02	9	sp|Q2TAL8|QRIC1_HUMAN
6	18710	ALVDILSEV	ALVDILSEV/2	3118.33	A02	9	sp|Q9BQG0|MBB1A_HUMAN
6	18621	GLYGAIFRL	GLYGAIFRL/2	3103.5	A02	9	sp|O95977|S1PR4_HUMAN
6	18616	SLISTILEV	SLISTILEV/2	3102.67	A02	9	sp|Q9Y263|PLAP_HUMAN
7	21711	SLFSVLVRV	SLFSVLVRV/2	3101.57	A02	9	sp|Q86V87|F16B2_HUMAN
6	18584	LLISGLPTI	LLISGLPTI/2	3097.33	A02	9	sp|Q7Z6Z7|HUWE1_HUMAN
6	18546	ILLKDILSV	ILLKDILSV/2	3091	A02	9	sp|Q13315|ATM_HUMAN
6	18546	FLHDHVDLQV	FLHDHVDLQV/2	3091	A02	10	sp|P78344|IF4G2_HUMAN
6	18419	FLFNKVVNL	FLFNKVVNL/2	3069.83	A02	9	sp|P62699|YPEL5_HUMAN
7	21462	SLFKIWLV	SLFKIWLV/2	3066	A02	8	sp|Q6PID8|KLD10_HUMAN
6	18380	SMADIPLGFGV	SM[147]ADIPLGFGV/2	3063.33	A02	11	sp|Q9Y221|NIP7_HUMAN
3	9167	ILADLLPSL	ILADLLPSL/2	3055.67	A02	9	sp|Q6IAN0|DRS7B_HUMAN
6	18315	FILPYIHKA	FILPYIHKA/3	3052.5	A02	9	sp|Q6P1A2|MBOA5_HUMAN
6	18309	YLNALVHLI	YLNALVHLI/2	3051.5	A02	9	sp|Q9H6A9|PCX3_HUMAN
7	21315	KLIEFLLKA	KLIEFLLKA/2	3045	A02	9	sp|Q5H9R7|PP6R3_HUMAN
4	12155	YLLPSVVLL	YLLPSVVLL/2	3038.75	A02	9	sp|Q9NUQ2|PLCE_HUMAN
6	18226	MLFGHPLLV	M[147]LFGHPLLV/2	3037.67	A02	9	sp|P51784|UBP11_HUMAN
7	21207	SLVSSLYKV	SLVSSLYKV/2	3029.57	A02	9	sp|Q9BYI3|HYCCI_HUMAN
7	21165	YLGDVSERV	YLGDVSERV/2	3023.57	A02	9	sp|P53621|COPA_HUMAN
5	15036	SLASVIFLL	SLASVIFLL/2	3007.2	A02	9	sp|Q9UBM7|DHCR7_HUMAN
4	12023	KLWDPNEFAV	KLWDPNEFAV/2	3005.75	A02	10	sp|Q14156|EFR3A_HUMAN
4	12018	RLYEITIEV	RLYEITIEV/2	3004.5	A02	9	sp|Q8TEM1|PO210_HUMAN
6	17966	GLIDHQTYL	GLIDHQTYL/2	2994.33	A02	9	sp|Q15149|PLEC_HUMAN
4	11959	ALLDKLYAL	ALLDKLYAL/2	2989.75	A02	9	sp|Q9NV31|IMP3_HUMAN
6	17917	TLDDLIAAV	TLDDLIAAV/2	2986.17	A02	9	sp|Q8IWZ3|ANKH1_HUMAN
5	14912	KIMDYSLLVGI	KIM[147]DYSLLVGI/2	2982.4	A02	11	sp|P78356|PI42B_HUMAN
7	20819	TLFDYEVRL	TLFDYEVRL/2	2974.14	A02	9	sp|Q96T88|UHRF1_HUMAN
7	20671	KLDQVIIHV	KLDQVIIHV/2	2953	A02	9	sp|Q9BXD5|NPL_HUMAN
8	23612	LLPHILVYV	LLPHILVYV/2	2951.5	A02	9	sp|Q13535|ATR_HUMAN
7	20561	YLITLLEHL	YLITLLEHL/2	2937.29	A02	9	sp|O43683|BUB1_HUMAN
6	17573	LLFDLEIAL	LLFDLEIAL/2	2928.83	A02	9	sp|P03897|NU3M_HUMAN
6	17553	FLLPILSQI	FLLPILSQI/2	2925.5	A02	9	sp|O15523|DDX3Y_HUMAN
7	20392	VLFNKLTYL	VLFNKLTYL/2	2913.14	A02	9	sp|Q5R372|RBG1L_HUMAN
6	17439	GLYEGLTWL	GLYEGLTWL/2	2906.5	A02	9	sp|P62330|ARF6_HUMAN
4	11582	YMNHIMVSV	YM[147]NHIMVSV/2	2895.5	A02	9	sp|P41212|ETV6_HUMAN
6	17340	KMADIEYRL	KMADIEYRL/2	2890	A02	9	sp|P40937|RFC5_HUMAN
6	17333	VLIDDLTTL	VLIDDLTTL/2	2888.83	A02	9	sp|Q9Y2Z2|MTO1_HUMAN
3	8651	KMMDVTVTI	KM[147]M[147]DVTVTI/2	2883.67	A02	9	sp|Q15155|NOMO1_HUMAN
6	17132	YLIPDIDLKL	YLIPDIDLKL/2	2855.33	A02	10	sp|Q92922|SMRC1_HUMAN
7	19974	ILAELLLRV	ILAELLLRV/2	2853.43	A02	9	sp|P50613|CDK7_HUMAN
5	14167	RLDDSLLYL	RLDDSLLYL/2	2833.4	A02	9	sp|P49406|RM19_HUMAN
5	14167	KLYAGAILEV	KLYAGAILEV/2	2833.4	A02	10	sp|O60613|SEP15_HUMAN
7	19829	SLFSHLLEI	SLFSHLLEI/2	2832.71	A02	9	sp|Q6ZS81|WDFY4_HUMAN
6	16996	SLLGHLMIV	SLLGHLM[147]IV/2	2832.67	A02	9	sp|P49773|HINT1_HUMAN
6	16976	AMLPSITNV	AM[147]LPSITNV/2	2829.33	A02	9	sp|Q9Y4A5|TRRAP_HUMAN
5	14146	VLLSHLSYL	VLLSHLSYL/2	2829.2	A02	9	sp|Q01543|FLI1_HUMAN
6	16970	FLSSVIQNL	FLSSVIQNL/2	2828.33	A02	9	sp|Q99460|PSMD1_HUMAN
7	19741	GLIPQLIGV	GLIPQLIGV/2	2820.14	A02	9	sp|O75746|CMC1_HUMAN
4	11279	KLMDKVVRL	KLMDKVVRL/3	2819.75	A02	9	sp|Q13191|CBLB_HUMAN
6	16899	KLIQNVFEI	KLIQNVFEI/2	2816.5	A02	9	sp|O00471|EXOC5_HUMAN
6	16870	LLLPLNLEV	LLLPLNLEV/2	2811.67	A02	9	sp|Q96RL7|VP13A_HUMAN
7	19655	KLQEQIHRV	KLQEQIHRV/3	2807.86	A02	9	sp|O60293|ZC3H1_HUMAN
5	13983	ALLAYTLGV	ALLAYTLGV/2	2796.6	A02	9	sp|P68104|EF1A1_HUMAN
5	13973	KLYEAVPQL	KLYEAVPQL/2	2794.6	A02	9	sp|O00311|CDC7_HUMAN
6	16765	YLDLFGDPSV	YLDLFGDPSV/2	2794.17	A02	10	sp|P14324|FPPS_HUMAN
3	8372	FIWENIHTL	FIWENIHTL/2	2790.67	A02	9	sp|Q03001|DYST_HUMAN
7	19529	SLIEVVIGL	SLIEVVIGL/2	2789.86	A02	9	sp|Q9UGH3|S23A2_HUMAN
4	11151	KIADFGWSV	KIADFGWSV/2	2787.75	A02	9	sp|Q9UQB9|AURKC_HUMAN
8	22201	FLFEPVVKA	FLFEPVVKA/2	2775.12	A02	9	sp|Q6IN85|P4R3A_HUMAN
6	16640	LLAEQGYEV	LLAEQGYEV/2	2773.33	A02	9	sp|Q9UBV2|SE1L1_HUMAN
7	19412	KLFDTQQFL	KLFDTQQFL/2	2773.14	A02	9	sp|Q15306|IRF4_HUMAN
7	19405	LLLPILVTV	LLLPILVTV/2	2772.14	A02	9	sp|O94822|LTN1_HUMAN
7	19392	SLIDFLRVV	SLIDFLRVV/2	2770.29	A02	9	sp|P43378|PTN9_HUMAN
7	19346	ALVESLITV	ALVESLITV/2	2763.71	A02	9	sp|Q8N655|CJ012_HUMAN
8	22078	SLLQTLYKV	SLLQTLYKV/2	2759.75	A02	9	sp|P46060|RAGP1_HUMAN
7	19291	SLSEKQYFL	SLSEKQYFL/2	2755.86	A02	9	sp|Q8TCY9|URGCP_HUMAN
7	19232	SLWSIISKV	SLWSIISKV/2	2747.43	A02	9	sp|Q96GC9|VMP1_HUMAN
4	10986	KLLAVIHEL	KLLAVIHEL/2	2746.5	A02	9	sp|Q9Y620|RA54B_HUMAN
5	13697	KLLPQLTYL	KLLPQLTYL/2	2739.4	A02	9	sp|P39687|AN32A_HUMAN
7	19146	VLMKLFIKV	VLM[147]KLFIKV/3	2735.14	A02	9	sp|Q9H583|HEAT1_HUMAN
8	21820	NLAEKLIGV	NLAEKLIGV/2	2727.5	A02	9	sp|Q86X10|RLGPB_HUMAN
8	21691	HLLEEPIYL	HLLEEPIYL/2	2711.38	A02	9	sp|Q9BUB4|ADAT1_HUMAN
8	21593	SLVEIILHV	SLVEIILHV/2	2699.12	A02	9	sp|Q9UNM6|PSD13_HUMAN
4	10770	SLAELVHAV	SLAELVHAV/2	2692.5	A02	9	sp|Q9Y6P5|SESN1_HUMAN
5	13402	YLAPFLRNV	YLAPFLRNV/2	2680.4	A02	9	sp|A5YKK6|CNOT1_HUMAN
7	18664	KLIAKIPTI	KLIAKIPTI/2	2666.29	A02	9	sp|Q92753|RORB_HUMAN
7	18650	ALLNILSEV	ALLNILSEV/2	2664.29	A02	9	sp|A0AVT1|UBA6_HUMAN
8	21296	FLIEEQKIVV	FLIEEQKIVV/2	2662	A02	10	sp|P49207|RL34_HUMAN
7	18598	LLLDSNIRL	LLLDSNIRL/2	2656.86	A02	9	sp|Q9P0I2|EMC3_HUMAN
6	15901	VLAPLVIYL	VLAPLVIYL/2	2650.17	A02	9	sp|Q9H461|FZD8_HUMAN
8	21153	GLLNIAWGL	GLLNIAWGL/2	2644.12	A02	9	sp|Q9H2L5|RASF4_HUMAN
6	15802	VLLSTIHEL	VLLSTIHEL/2	2633.67	A02	9	sp|Q6I9Y2|THOC7_HUMAN
7	18417	SMVDVVMLL	SM[147]VDVVMLL/2	2631	A02	9	sp|P46379|BAG6_HUMAN
7	18372	GILPMVPEV	GILPM[147]VPEV/2	2624.57	A02	9	sp|O95793|STAU1_HUMAN
6	15684	KLMDLDVEQL	KLM[147]DLDVEQL/2	2614	A02	10	sp|P12004|PCNA_HUMAN
7	18160	ALLGGLVNV	ALLGGLVNV/2	2594.29	A02	9	sp|Q8N4S7|PAQR4_HUMAN
8	20748	GLIEWLENTV	GLIEWLENTV/2	2593.5	A02	10	sp|P78527|PRKDC_HUMAN
4	10365	YIVPCLHEV	YIVPCLHEV/2	2591.25	A02	9	sp|Q9H6Z9|EGLN3_HUMAN
8	20723	GMYIFLHTV	GM[147]YIFLHTV/2	2590.38	A02	9	sp|Q8N138|ORML3_HUMAN
8	20623	KLYDIDVAKV	KLYDIDVAKV/2	2577.88	A02	10	sp|P62750|RL23A_HUMAN
8	20570	FLFLDRTYV	FLFLDRTYV/2	2571.25	A02	9	sp|Q13619|CUL4A_HUMAN
8	20536	QLIEKNWLL	QLIEKNWLL/2	2567	A02	9	sp|Q9NS87|KIF15_HUMAN
4	10253	YLGPHIASV	YLGPHIASV/2	2563.25	A02	9	sp|Q96GC9|VMP1_HUMAN
6	15346	GLWHGVLTSV	GLWHGVLTSV/2	2557.67	A02	10	sp|Q14689|DIP2A_HUMAN
6	15282	RLFDDSTVTTV	RLFDDSTVTTV/2	2547	A02	11	sp|O94966|UBP19_HUMAN
5	12731	FLLPAGWIL	FLLPAGWIL/2	2546.2	A02	9	sp|P10176|COX8A_HUMAN
2	5091	YMMPVNSEV	YM[147]M[147]PVNSEV/2	2545.5	A02	9	sp|Q9BZD4|NUF2_HUMAN
6	15231	YLWNLQVKL	YLWNLQVKL/2	2538.5	A02	9	sp|Q96DM3|MIC1_HUMAN
7	17721	ALWDIETGQQTV	ALWDIETGQQTV/2	2531.57	A02	12	sp|P62879|GBB2_HUMAN
7	17696	YLISQVEGHQV	YLISQVEGHQV/2	2528	A02	11	sp|Q9Y3C4|TPRKB_HUMAN
6	15165	RLFSSIVTV	RLFSSIVTV/2	2527.5	A02	9	sp|Q9NX74|DUS2L_HUMAN
7	17651	KLFDAPLSI	KLFDAPLSI/2	2521.57	A02	9	sp|A8K0Z3|WASH1_HUMAN
8	20129	VLVSELIPWAV	VLVSELIPWAV/2	2516.12	A02	11	sp|Q9Y3A0|COQ4_HUMAN
8	20035	RTIEYLEEV	RTIEYLEEV/2	2504.38	A02	9	sp|P40939|ECHA_HUMAN
9	22468	QMISRIEYV	QM[147]ISRIEYV/2	2496.44	A02	9	sp|Q8N752|KC1AL_HUMAN
7	17404	KLHDSVVMV	KLHDSVVM[147]V/2	2486.29	A02	9	sp|Q9GZN8|CT027_HUMAN
7	17354	KLNPQQFEV	KLNPQQFEV/2	2479.14	A02	9	sp|P46977|STT3A_HUMAN
6	14865	FIADLVVGL	FIADLVVGL/2	2477.5	A02	9	sp|P06733|ENOA_HUMAN
4	9895	YLADIFTKL	YLADIFTKL/2	2473.75	A02	9	sp|Q49AG3|ZBED5_HUMAN
7	17314	GLYPGLIWL	GLYPGLIWL/2	2473.43	A02	9	sp|O14896|IRF6_HUMAN
7	17296	ALATLIHQV	ALATLIHQV/2	2470.86	A02	9	sp|Q9UBW8|CSN7A_HUMAN
8	19729	FLTEIENLFL	FLTEIENLFL/2	2466.12	A02	10	sp|Q5VVJ2|MYSM1_HUMAN
6	14757	ALIDYTLEFL	ALIDYTLEFL/2	2459.5	A02	10	sp|Q13144|EI2BE_HUMAN
5	12269	RLTDYVAFL	RLTDYVAFL/2	2453.8	A02	9	sp|Q99627|CSN8_HUMAN
5	12252	KLLSFTHKL	KLLSFTHKL/2	2450.4	A02	9	sp|A3KMH1|VWA8_HUMAN
5	12231	FLWERPTLL	FLWERPTLL/2	2446.2	A02	9	sp|Q6IN84|MRM1_HUMAN
6	14669	GMAERIPEL	GM[147]AERIPEL/2	2444.83	A02	9	sp|O95573|ACSL3_HUMAN
3	7331	YLSPKLWAL	YLSPKLWAL/2	2443.67	A02	9	sp|Q9BRS8|LARP6_HUMAN
9	21988	TMVDRIEEV	TM[147]VDRIEEV/2	2443.11	A02	9	sp|P29375|KDM5A_HUMAN
8	19489	HLGDFLVFL	HLGDFLVFL/2	2436.12	A02	9	sp|Q15751|HERC1_HUMAN
8	19481	QLAQFVHEV	QLAQFVHEV/2	2435.12	A02	9	sp|A8MPP1|D11L8_HUMAN
8	19297	ILWSEAIFL	ILWSEAIFL/2	2412.12	A02	9	sp|O94906|PRP6_HUMAN
8	19256	KLIQESPTV	KLIQESPTV/2	2407	A02	9	sp|Q86XR8|CEP57_HUMAN
7	16795	VLAPLIALV	VLAPLIALV/2	2399.29	A02	9	sp|Q9Y320|TMX2_HUMAN
9	21591	KLADDVDLEQV	KLADDVDLEQV/2	2399	A02	11	sp|P55072|TERA_HUMAN
4	9590	RLLENMTEV	RLLENM[147]TEV/2	2397.5	A02	9	sp|Q6P996|PDXD1_HUMAN
9	21490	ALDHMVEYV	ALDHM[147]VEYV/2	2387.78	A02	9	sp|O60664|PLIN3_HUMAN
7	16597	FLQDIPDGLFL	FLQDIPDGLFL/2	2371	A02	11	sp|Q99755|PI51A_HUMAN
9	21287	QLLKFIPGL	QLLKFIPGL/2	2365.22	A02	9	sp|O60759|CYTIP_HUMAN
6	14181	FLLPVINEM	FLLPVINEM[147]/2	2363.5	A02	9	sp|Q9Y605|MOFA1_HUMAN
7	16477	RLFSKGFLV	RLFSKGFLV/2	2353.86	A02	9	sp|P57678|GEMI4_HUMAN
8	18794	ILSPLNVFV	ILSPLNVFV/2	2349.25	A02	9	sp|Q2LD37|K1109_HUMAN
8	18767	KLFGMIITI	KLFGM[147]IITI/2	2345.88	A02	9	sp|P61619|S61A1_HUMAN
5	11688	HLYDYTVKL	HLYDYTVKL/2	2337.6	A02	9	sp|O00291|HIP1_HUMAN
9	21037	GLLTGILETV	GLLTGILETV/2	2337.44	A02	10	sp|Q96QU8|XPO6_HUMAN
8	18666	ILWEHLEIL	ILWEHLEIL/2	2333.25	A02	9	sp|P14921|ETS1_HUMAN
8	18650	SLQEKLWAI	SLQEKLWAI/2	2331.25	A02	9	sp|Q9Y6I8|PXMP4_HUMAN
10	23290	YLINEIDRI	YLINEIDRI/2	2329	A02	9	sp|Q03001|DYST_HUMAN
4	9300	YLIPFTGIVGL	YLIPFTGIVGL/2	2325	A02	11	sp|Q9H6Y7|RN167_HUMAN
6	13944	ALMPVLNQV	ALMPVLNQV/2	2324	A02	9	sp|Q5RKV6|EXOS6_HUMAN
7	16171	SLLDRFLATV	SLLDRFLATV/2	2310.14	A02	10	sp|Q14094|CCNI_HUMAN
8	18455	ALANGIEEV	ALANGIEEV/2	2306.88	A02	9	sp|O95236|APOL3_HUMAN
9	20689	ILVGLLHMV	ILVGLLHM[147]V/2	2298.78	A02	9	sp|Q53FV1|ORML2_HUMAN
8	18287	SLLDTLVLL	SLLDTLVLL/2	2285.88	A02	9	sp|Q2VPB7|AP5B1_HUMAN
7	15978	SMLQKTWLL	SM[147]LQKTWLL/2	2282.57	A02	9	sp|Q9BWH6|RPAP1_HUMAN
5	11400	YLTDLQVSL	YLTDLQVSL/2	2280	A02	9	sp|Q9Y4A8|NF2L3_HUMAN
5	11397	LLLSLLPAL	LLLSLLPAL/2	2279.4	A02	9	sp|Q16553|LY6E_HUMAN
7	15946	VLDEGSASV	VLDEGSASV/2	2278	A02	9	sp|Q05923|DUS2_HUMAN
9	20467	GLAELYVMV	GLAELYVM[147]V/2	2274.11	A02	9	sp|Q8N511|TM199_HUMAN
8	18160	LLANIVPIAMLV	LLANIVPIAM[147]LV/2	2270	A02	12	sp|P03901|NU4LM_HUMAN
8	18160	FLKDLVASV	FLKDLVASV/2	2270	A02	9	sp|Q14919|NC2A_HUMAN
8	18116	ALLPIFFGA	ALLPIFFGA/2	2264.5	A02	9	sp|Q8TCT9|HM13_HUMAN
9	20362	VLYTGVVRV	VLYTGVVRV/2	2262.44	A02	9	sp|Q9H1A4|APC1_HUMAN
8	18063	FLLDKPQDLSI	FLLDKPQDLSI/2	2257.88	A02	11	sp|Q6ZN28|MACC1_HUMAN
10	22487	FQIGPVAGV	FQIGPVAGV/2	2248.7	A02	9	sp|Q14246|EMR1_HUMAN
9	20219	KLGDIMGV	KLGDIM[147]GV/2	2246.56	A02	8	sp|Q92620|PRP16_HUMAN
8	17958	GLVPFLVSV	GLVPFLVSV/2	2244.75	A02	9	sp|P52292|IMA1_HUMAN
6	13444	RLFEVPHEL	RLFEVPHEL/2	2240.67	A02	9	sp|Q9Y3M8|STA13_HUMAN
8	17896	KLWEMDNMLI	KLWEM[147]DNM[147]LI/2	2237	A02	10	sp|Q9Y605|MOFA1_HUMAN
7	15655	KLQEQLPEL	KLQEQLPEL/2	2236.43	A02	9	sp|Q14746|COG2_HUMAN
7	15642	ALADKELLPSV	ALADKELLPSV/2	2234.57	A02	11	sp|Q9BRQ8|AIFM2_HUMAN
6	13376	RMLPHAPGV	RMLPHAPGV/2	2229.33	A02	9	sp|Q92769|HDAC2_HUMAN
9	20050	GLLGNVAEV	GLLGNVAEV/2	2227.78	A02	9	sp|Q7Z7L7|ZER1_HUMAN
9	19917	LLIKQVVEV	LLIKQVVEV/2	2213	A02	9	sp|Q8NDN9|RCBT1_HUMAN
9	19896	FLNGLEILL	FLNGLEILL/2	2210.67	A02	9	sp|Q9NU22|MDN1_HUMAN
8	17671	FIWPMLIHI	FIWPM[147]LIHI/2	2208.88	A02	9	sp|Q86XP3|DDX42_HUMAN
8	17658	FLSTINVGL	FLSTINVGL/2	2207.25	A02	9	sp|P39687|AN32A_HUMAN
6	13214	YLTAEILEL	YLTAEILEL/2	2202.33	A02	9	sp|Q96QV6|H2A1A_HUMAN
8	17614	ALSEKIVSV	ALSEKIVSV/2	2201.75	A02	9	sp|Q567U6|CCD93_HUMAN
5	11008	ALMDLLLRL	ALMDLLLRL/2	2201.6	A02	9	sp|O75170|PP6R2_HUMAN
8	17608	FLGENISNFL	FLGENISNFL/2	2201	A02	10	sp|O14791|APOL1_HUMAN
9	19713	GLIDFAIQL	GLIDFAIQL/2	2190.33	A02	9	sp|Q86YW9|MD12L_HUMAN
9	19707	ILMDPSPEYA	ILM[147]DPSPEYA/2	2189.67	A02	10	sp|P26358|DNMT1_HUMAN
9	19370	FLPPLPTSV	FLPPLPTSV/2	2152.22	A02	9	sp|Q13057|COASY_HUMAN
10	21498	FLFNLPLNI	FLFNLPLNI/2	2149.8	A02	9	sp|Q96KP1|EXOC2_HUMAN
9	19325	ILLDIHIFM	ILLDIHIFM[147]/2	2147.22	A02	9	sp|Q14008|CKAP5_HUMAN
8	17091	HLYDIHVTV	HLYDIHVTV/2	2136.38	A02	9	sp|A8MXV4|NUD19_HUMAN
9	19149	ILLDDNMQIRL	ILLDDNM[147]QIRL/2	2127.67	A02	11	sp|P15735|PHKG2_HUMAN
10	21254	SLFSSPPEI	SLFSSPPEI/2	2125.4	A02	9	sp|Q6ZWJ1|STXB4_HUMAN
10	21230	RLPEAIEEV	RLPEAIEEV/2	2123	A02	9	sp|Q9UBQ7|GRHPR_HUMAN
8	16942	KLQELNYNL	KLQELNYNL/2	2117.75	A02	9	sp|P42224|STAT1_HUMAN
9	19037	VLLDAPIQL	VLLDAPIQL/2	2115.22	A02	9	sp|Q9NUQ8|ABCF3_HUMAN
10	20994	ALMDEVVKA	ALM[147]DEVVKA/2	2099.4	A02	9	sp|P00558|PGK1_HUMAN
9	18877	LMAHAMEEV	LM[147]AHAM[147]EEV/2	2097.44	A02	9	sp|Q07666|KHDR1_HUMAN
9	18863	RLLHEMILV	RLLHEM[147]ILV/3	2095.89	A02	9	sp|P53618|COPB_HUMAN
5	10479	WLAEKLPTL	WLAEKLPTL/2	2095.8	A02	9	sp|Q14008|CKAP5_HUMAN
8	16760	KIYEGQVEV	KIYEGQVEV/2	2095	A02	9	sp|P46777|RL5_HUMAN
10	20828	NLLKLIAEV	NLLKLIAEV/2	2082.8	A02	9	sp|Q9HBM1|SPC25_HUMAN
6	12377	FLSELTQQL	FLSELTQQL/2	2062.83	A02	9	sp|P14174|MIF_HUMAN
10	20411	GLDELFVQV	GLDELFVQV/2	2041.1	A02	9	sp|Q9HCN4|GPN1_HUMAN
9	18322	KLFEDELTL	KLFEDELTL/2	2035.78	A02	9	sp|O95202|LETM1_HUMAN
6	12188	KMWEEAISL	KMWEEAISL/2	2031.33	A02	9	sp|Q92608|DOCK2_HUMAN
9	18276	HLLDIYIQL	HLLDIYIQL/2	2030.67	A02	9	sp|Q9NU22|MDN1_HUMAN
2	4059	VLMDRLPSL	VLM[147]DRLPSL/2	2029.5	A02	9	sp|O60287|NPA1P_HUMAN
7	14145	YLVELSSLL	YLVELSSLL/2	2020.71	A02	9	sp|Q96JB5|CK5P3_HUMAN
10	20186	ALTDVILCV	ALTDVILCV/2	2018.6	A02	9	sp|Q8WZ60|KLHL6_HUMAN
10	20167	ILLSVPLLV	ILLSVPLLV/2	2016.7	A02	9	sp|P53621|COPA_HUMAN
11	22129	GLLSIFTKV	GLLSIFTKV/2	2011.73	A02	9	sp|Q6YHU6|THADA_HUMAN
11	22122	ALNELLQHV	ALNELLQHV/2	2011.09	A02	9	sp|Q9Y490|TLN1_HUMAN
4	8038	RMLHFLTAV	RM[147]LHFLTAV/3	2009.5	A02	9	sp|Q8WWM7|ATX2L_HUMAN
9	18059	GLYSGVTTV	GLYSGVTTV/2	2006.56	A02	9	sp|P23921|RIR1_HUMAN
10	20065	GLYSRQLYV	GLYSRQLYV/2	2006.5	A02	9	sp|P22314|UBA1_HUMAN
9	18048	SLHDAIMIV	SLHDAIM[147]IV/2	2005.33	A02	9	sp|Q99832|TCPH_HUMAN
10	20053	KLIPFLEKL	KLIPFLEKL/2	2005.3	A02	9	sp|Q05D32|CTSL2_HUMAN
6	11937	KLIPQLPTL	KLIPQLPTL/2	1989.5	A02	9	sp|Q9HB90|RRAGC_HUMAN
7	13910	ALMDQVHHM	ALM[147]DQVHHM[147]/2	1987.14	A02	9	sp|Q96BU1|S1PBP_HUMAN
8	15853	FLLPKVQSI	FLLPKVQSI/2	1981.62	A02	9	sp|A2VDJ0|T131L_HUMAN
11	21797	ALLGILQHV	ALLGILQHV/2	1981.55	A02	9	sp|Q8IVD9|NUDC3_HUMAN
10	19757	GLYPNLIQV	GLYPNLIQV/2	1975.7	A02	9	sp|Q7L2E3|DHX30_HUMAN
11	21679	SLLKFLAKV	SLLKFLAKV/2	1970.82	A02	9	sp|P43363|MAGAA_HUMAN
8	15752	KIWDPVHRV	KIWDPVHRV/3	1969	A02	9	sp|P29144|TPP2_HUMAN
4	7864	KLMDQLEAL	KLM[147]DQLEAL/2	1966	A02	9	sp|Q9NP79|VTA1_HUMAN
11	21582	SLFKLIVKV	SLFKLIVKV/2	1962	A02	9	sp|Q5UIP0|RIF1_HUMAN
9	17652	LLQDKQFEL	LLQDKQFEL/2	1961.33	A02	9	sp|Q96JC1|VPS39_HUMAN
9	17652	SLITRLLEV	SLITRLLEV/2	1961.33	A02	9	sp|P62140|PP1B_HUMAN
9	17634	KMVDGVGVCTV	KM[147]VDGVGVCTV/2	1959.33	A02	11	sp|Q5T4S7|UBR4_HUMAN
8	15669	KLIDKLDSL	KLIDKLDSL/2	1958.62	A02	9	sp|Q8N1I0|DOCK4_HUMAN
8	15650	GLLPDVPSL	GLLPDVPSL/2	1956.25	A02	9	sp|Q96N66|MBOA7_HUMAN
9	17561	RLAHYIDRV	RLAHYIDRV/2	1951.22	A02	9	sp|Q03252|LMNB2_HUMAN
7	13641	FLDPDIGGVAV	FLDPDIGGVAV/2	1948.71	A02	11	sp|Q6N021|TET2_HUMAN
8	15589	KLIDGQVIQL	KLIDGQVIQL/2	1948.62	A02	10	sp|P52747|ZN143_HUMAN
9	17500	ALADGVQKV	ALADGVQKV/2	1944.44	A02	9	sp|O14791|APOL1_HUMAN
11	21346	VLFGLLREV	VLFGLLREV/2	1940.55	A02	9	sp|Q92620|PRP16_HUMAN
7	13569	FLLDPYKYMTL	FLLDPYKYM[147]TL/2	1938.43	A02	11	sp|Q9UIG0|BAZ1B_HUMAN
11	21286	TLLHFLVEI	TLLHFLVEI/2	1935.09	A02	9	sp|Q9NSV4|DIAP3_HUMAN
8	15437	FLLPVAVKL	FLLPVAVKL/2	1929.62	A02	9	sp|O95202|LETM1_HUMAN
10	19152	ALVDHLNVGV	ALVDHLNVGV/2	1915.2	A02	10	sp|P78537|BL1S1_HUMAN
10	19124	KILQELPSV	KILQELPSV/2	1912.4	A02	9	sp|Q96ST2|IWS1_HUMAN
11	21014	KLIEELETL	KLIEELETL/2	1910.36	A02	9	sp|Q03060|CREM_HUMAN
9	17182	ALIGMSPQV	ALIGM[147]SPQV/2	1909.11	A02	9	sp|Q9NW15|ANO10_HUMAN
10	19083	VLAHTILGV	VLAHTILGV/2	1908.3	A02	9	sp|Q9NUQ7|UFSP2_HUMAN
5	9500	FLLQDTVEL	FLLQDTVEL/2	1900	A02	9	sp|P78344|IF4G2_HUMAN
11	20871	VLYHVETEV	VLYHVETEV/2	1897.36	A02	9	sp|Q9UBL3|ASH2L_HUMAN
11	20847	LLDRFLATV	LLDRFLATV/2	1895.18	A02	9	sp|Q14094|CCNI_HUMAN
4	7573	YLLDPSITL	YLLDPSITL/2	1893.25	A02	9	sp|P43897|EFTS_HUMAN
6	11350	FMLPDPQNISL	FM[147]LPDPQNISL/2	1891.67	A02	11	sp|Q8WW01|SEN15_HUMAN
10	18882	GLIDRQVTV	GLIDRQVTV/2	1888.2	A02	9	sp|Q9UPN3|MACF1_HUMAN
8	15101	SLLEPFVYL	SLLEPFVYL/2	1887.62	A02	9	sp|Q9NYR9|KBRS2_HUMAN
11	20747	SLVEQLTMV	SLVEQLTM[147]V/2	1886.09	A02	9	sp|O75448|MED24_HUMAN
8	15052	VLWPLPAYL	VLWPLPAYL/2	1881.5	A02	9	sp|Q9P2X0|DPM3_HUMAN
3	5639	YLAERIPTL	YLAERIPTL/2	1879.67	A02	9	sp|P19237|TNNI1_HUMAN
8	15022	ALLSAAFLL	ALLSAAFLL/2	1877.75	A02	9	sp|Q9Y320|TMX2_HUMAN
12	22532	LLNPVVEFV	LLNPVVEFV/2	1877.67	A02	9	sp|P78527|PRKDC_HUMAN
8	15007	ALIEKLVEL	ALIEKLVEL/2	1875.88	A02	9	sp|Q14181|DPOA2_HUMAN
9	16866	TLIAAILYL	TLIAAILYL/2	1874	A02	9	sp|Q04941|PLP2_HUMAN
11	20578	VMDSKIVQV	VM[147]DSKIVQV/2	1870.73	A02	9	sp|P52294|IMA5_HUMAN
10	18691	GLIEKNIEL	GLIEKNIEL/2	1869.1	A02	9	sp|P26358|DNMT1_HUMAN
12	22360	GLMDTVKKV	GLM[147]DTVKKV/2	1863.33	A02	9	sp|Q9Y692|GMEB1_HUMAN
6	11163	ALLEGLLEL	ALLEGLLEL/2	1860.5	A02	9	sp|O95400|CD2B2_HUMAN
10	18602	KLWEMDNMLIQI	KLWEM[147]DNM[147]LIQI/2	1860.2	A02	12	sp|Q9Y605|MOFA1_HUMAN
9	16616	FLDPRPLTV	FLDPRPLTV/2	1846.22	A02	9	sp|Q16678|CP1B1_HUMAN
11	20224	TLISDIEAV	TLISDIEAV/2	1838.55	A02	9	sp|Q8NG11|TSN14_HUMAN
8	14700	ILAEFEMTL	ILAEFEM[147]TL/2	1837.5	A02	9	sp|Q9Y3L3|3BP1_HUMAN
11	20156	KLLGSMEQV	KLLGSM[147]EQV/2	1832.36	A02	9	sp|Q96LV5|IN4L1_HUMAN
13	23661	LLNEILEQV	LLNEILEQV/2	1820.08	A02	9	sp|Q9BPX3|CND3_HUMAN
10	18115	TLAELLVLL	TLAELLVLL/2	1811.5	A02	9	sp|Q15363|TMED2_HUMAN
7	12668	SLASLLVSV	SLASLLVSV/2	1809.71	A02	9	sp|Q15024|EXOS7_HUMAN
9	16263	RLIEESVTV	RLIEESVTV/2	1807	A02	9	sp|Q12769|NU160_HUMAN
4	7208	RLAQHITYV	RLAQHITYV/2	1802	A02	9	sp|P33993|MCM7_HUMAN
11	19803	YQYPVIIHL	YQYPVIIHL/2	1800.27	A02	9	sp|Q9BW60|ELOV1_HUMAN
4	7192	FLLEGIRSL	FLLEGIRSL/2	1798	A02	9	sp|P55160|NCKPL_HUMAN
9	16086	KLLGELHTL	KLLGELHTL/2	1787.33	A02	9	sp|Q15154|PCM1_HUMAN
8	14245	IIDQHTFEV	IIDQHTFEV/2	1780.62	A02	9	sp|Q16531|DDB1_HUMAN
12	21366	GLIDENPGL	GLIDENPGL/2	1780.5	A02	9	sp|P78527|PRKDC_HUMAN
12	21338	NLIEVNEEV	NLIEVNEEV/2	1778.17	A02	9	sp|P86791|CCZ1_HUMAN
11	19507	VLSDIIQNL	VLSDIIQNL/2	1773.36	A02	9	sp|P55160|NCKPL_HUMAN
12	21225	FLYSDEVQI	FLYSDEVQI/2	1768.75	A02	9	sp|Q9H0C5|BTBD1_HUMAN
11	19449	ILYGKIIHL	ILYGKIIHL/2	1768.09	A02	9	sp|P0CG13|CTF8_HUMAN
12	21188	VLTSEVHSV	VLTSEVHSV/2	1765.67	A02	9	sp|Q9NVM9|ASUN_HUMAN
6	10594	YLSGIIVTL	YLSGIIVTL/2	1765.67	A02	9	sp|P78382|S35A1_HUMAN
11	19347	RLLETVIDV	RLLETVIDV/2	1758.82	A02	9	sp|P57678|GEMI4_HUMAN
11	19311	ALFEQKGPVYV	ALFEQKGPVYV/2	1755.55	A02	11	sp|P54709|AT1B3_HUMAN
10	17537	GVAESIHLWEV	GVAESIHLWEV/2	1753.7	A02	11	sp|Q9BV38|WDR18_HUMAN
11	19278	TLSSLVFQL	TLSSLVFQL/2	1752.55	A02	9	sp|P42345|MTOR_HUMAN
11	19272	YLSVKIWDL	YLSVKIWDL/2	1752	A02	9	sp|P63151|2ABA_HUMAN
12	20999	VLIDYQRNV	VLIDYQRNV/2	1749.92	A02	9	sp|O14980|XPO1_HUMAN
10	17459	KLMNVDPDSV	KLM[147]NVDPDSV/2	1745.9	A02	10	sp|O75293|GA45B_HUMAN
12	20936	ITDDLHFYV	ITDDLHFYV/2	1744.67	A02	9	sp|Q7KZF4|SND1_HUMAN
11	19167	KLFDLDEKLML	KLFDLDEKLM[147]L/3	1742.45	A02	11	sp|Q96ER3|SAAL1_HUMAN
7	12162	KIWDVSVNSV	KIWDVSVNSV/2	1737.43	A02	10	sp|O75083|WDR1_HUMAN
8	13889	LLWPGAALLV	LLWPGAALLV/2	1736.12	A02	10	sp|Q9GZY6|NTAL_HUMAN
11	19054	SLLQALNEV	SLLQALNEV/2	1732.18	A02	9	sp|Q14204|DYHC1_HUMAN
13	22489	VLIGEFLEKV	VLIGEFLEKV/2	1729.92	A02	10	sp|O43148|MCES_HUMAN
9	15552	ALASVAYQV	ALASVAYQV/2	1728	A02	9	sp|Q9P2A4|ABI3_HUMAN
13	22377	NLLTHIENV	NLLTHIENV/2	1721.31	A02	9	sp|A8MW92|P20L1_HUMAN
4	6885	SLWPMTFGL	SLWPM[147]TFGL/2	1721.25	A02	9	sp|O75251|NDUS7_HUMAN
12	20622	ALDIMIPMV	ALDIM[147]IPM[147]V/2	1718.5	A02	9	sp|Q99683|M3K5_HUMAN
13	22237	TLLRLLYEA	TLLRLLYEA/2	1710.54	A02	9	sp|Q7L2H7|EIF3M_HUMAN
12	20488	ILDQKINEV	ILDQKINEV/2	1707.33	A02	9	sp|P11926|DCOR_HUMAN
11	18676	ILLRDLPTL	ILLRDLPTL/2	1697.82	A02	9	sp|Q3ZCQ3|F174B_HUMAN
7	11869	SLLPAIVEL	SLLPAIVEL/2	1695.57	A02	9	sp|P30153|2AAA_HUMAN
10	16935	ALLDNNIGL	ALLDNNIGL/2	1693.5	A02	9	sp|O75153|CLU_HUMAN
11	18560	GLADNTVIAKV	GLADNTVIAKV/2	1687.27	A02	11	sp|P26639|SYTC_HUMAN
6	10095	KLLQFYPSL	KLLQFYPSL/2	1682.5	A02	9	sp|Q9GZY6|NTAL_HUMAN
11	18507	VMFEDGVLMRL	VM[147]FEDGVLM[147]RL/2	1682.45	A02	11	sp|Q13535|ATR_HUMAN
11	18461	TLLHFLAEL	TLLHFLAEL/2	1678.27	A02	9	sp|O60610|DIAP1_HUMAN
11	18385	RLQEEINEV	RLQEEINEV/2	1671.36	A02	9	sp|Q70UQ0|IKIP_HUMAN
11	18353	FLSTLHEVYL	FLSTLHEVYL/2	1668.45	A02	10	sp|Q9NPI6|DCP1A_HUMAN
10	16672	GLFDTAISL	GLFDTAISL/2	1667.2	A02	9	sp|Q12769|NU160_HUMAN
11	18267	TLLLHTWLL	TLLLHTWLL/2	1660.64	A02	9	sp|Q92608|DOCK2_HUMAN
11	18258	NLMDIKIGL	NLMDIKIGL/2	1659.82	A02	9	sp|Q13576|IQGA2_HUMAN
10	16596	SLLGGDVVSV	SLLGGDVVSV/2	1659.6	A02	10	sp|Q99576|T22D3_HUMAN
3	4973	FLWDDSMAL	FLWDDSM[147]AL/2	1657.67	A02	9	sp|O95834|EMAL2_HUMAN
12	19872	KLLDPEDISV	KLLDPEDISV/2	1656	A02	10	sp|Q01082|SPTB2_HUMAN
6	9893	VLMDRLPSLL	VLM[147]DRLPSLL/2	1648.83	A02	10	sp|O60287|NPA1P_HUMAN
12	19776	KIIGIMEEV	KIIGIM[147]EEV/2	1648	A02	9	sp|P52701|MSH6_HUMAN
10	16457	ALDPASLPRV	ALDPASLPRV/2	1645.7	A02	10	sp|Q5TEJ8|THMS2_HUMAN
13	21319	GLIDVKPLGV	GLIDVKPLGV/2	1639.92	A02	10	sp|Q8WVY7|UBCP1_HUMAN
8	13110	KVIEINPYL	KVIEINPYL/2	1638.75	A02	9	sp|P28074|PSB5_HUMAN
13	21298	QLVDFQWKL	QLVDFQWKL/2	1638.31	A02	9	sp|Q7Z4G1|COMD6_HUMAN
4	6532	FLAGAVTSV	FLAGAVTSV/2	1633	A02	9	sp|A8MPS7|YDJC_HUMAN
7	11362	SLLPFWYTL	SLLPFWYTL/2	1623.14	A02	9	sp|Q14697|GANAB_HUMAN
12	19433	QLLEKVPTL	QLLEKVPTL/2	1619.42	A02	9	sp|Q96T49|PP16B_HUMAN
8	12945	FLLPKVQSIQL	FLLPKVQSIQL/2	1618.12	A02	11	sp|A2VDJ0|T131L_HUMAN
12	19405	GLVASLISV	GLVASLISV/2	1617.08	A02	9	sp|O95347|SMC2_HUMAN
13	21011	FLFGYPKRL	FLFGYPKRL/3	1616.23	A02	9	sp|Q9HAY2|MAGF1_HUMAN
14	22516	YLPHAPPFA	YLPHAPPFA/2	1608.29	A02	9	sp|P17275|JUNB_HUMAN
10	16072	HLWAELVFL	HLWAELVFL/2	1607.2	A02	9	sp|P53675|CLH2_HUMAN
14	22469	SLIEKLWQT	SLIEKLWQT/2	1604.93	A02	9	sp|P48380|RFX3_HUMAN
10	15974	TLADIIARL	TLADIIARL/2	1597.4	A02	9	sp|Q9P2P1|NYNRI_HUMAN
13	20761	RILDILEYI	RILDILEYI/2	1597	A02	9	sp|Q99986|VRK1_HUMAN
13	20754	TLYEAVREV	TLYEAVREV/2	1596.46	A02	9	sp|P62906|RL10A_HUMAN
7	11165	YLADTVQKL	YLADTVQKL/2	1595	A02	9	sp|Q9NX45|SOLH2_HUMAN
12	19031	LLSKVLIYL	LLSKVLIYL/2	1585.92	A02	9	sp|O14981|BTAF1_HUMAN
12	19029	MLYEKLLTA	M[147]LYEKLLTA/2	1585.75	A02	9	sp|Q76N89|HECW1_HUMAN
9	14268	FLVPVLEAL	FLVPVLEAL/2	1585.33	A02	9	sp|Q13206|DDX10_HUMAN
5	7889	YLITHPLAV	YLITHPLAV/2	1577.8	A02	9	sp|Q96N67|DOCK7_HUMAN
12	18913	KIGSIIFQV	KIGSIIFQV/2	1576.08	A02	9	sp|Q460N5|PAR14_HUMAN
14	22046	VLINRIDLV	VLINRIDLV/2	1574.71	A02	9	sp|Q9HCK8|CHD8_HUMAN
10	15746	KLFDRPQEL	KLFDRPQEL/2	1574.6	A02	9	sp|Q5VZ89|DEN4C_HUMAN
9	14170	VLAWGLLNV	VLAWGLLNV/2	1574.44	A02	9	sp|Q96SK2|TM209_HUMAN
11	17312	VLIPKLPQL	VLIPKLPQL/2	1573.82	A02	9	sp|Q8N138|ORML3_HUMAN
12	18872	VLWKEILFL	VLWKEILFL/2	1572.67	A02	9	sp|Q9NPR9|GP108_HUMAN
14	21945	TLINLLLKV	TLINLLLKV/2	1567.5	A02	9	sp|Q9H3H5|GPT_HUMAN
11	17223	SLFLGILSV	SLFLGILSV/2	1565.73	A02	9	sp|P11836|CD20_HUMAN
13	20305	TLIDLPGITRV	TLIDLPGITRV/2	1561.92	A02	11	sp|P20591|MX1_HUMAN
9	14054	FLLEPGNLEVLL	FLLEPGNLEVLL/2	1561.56	A02	12	sp|Q6ZNJ1|NBEL2_HUMAN
13	20297	ILTETINTV	ILTETINTV/2	1561.31	A02	9	sp|O60763|USO1_HUMAN
13	20254	SILHDVVEV	SILHDVVEV/2	1558	A02	9	sp|O75391|SPAG7_HUMAN
10	15557	FLLPHPGLKV	FLLPHPGLKV/3	1555.7	A02	10	sp|Q8WXF7|ATLA1_HUMAN
7	10853	RLIALSFGL	RLIALSFGL/2	1550.43	A02	9	sp|O95140|MFN2_HUMAN
5	7751	KMAEMLVEL	KM[147]AEMLVEL/2	1550.2	A02	9	sp|Q9Y605|MOFA1_HUMAN
12	18591	ALLNGEYLL	ALLNGEYLL/2	1549.25	A02	9	sp|Q9BV38|WDR18_HUMAN
10	15468	KLYELYLQL	KLYELYLQL/2	1546.8	A02	9	sp|O75691|UTP20_HUMAN
12	18498	FLQEGDLISA	FLQEGDLISA/2	1541.5	A02	10	sp|Q13868|EXOS2_HUMAN
10	15401	KLLDIPGLEV	KLLDIPGLEV/2	1540.1	A02	10	sp|Q96CD2|COAC_HUMAN
4	6158	YLAEVMVRL	YLAEVM[147]VRL/2	1539.5	A02	9	sp|Q96GZ6|S41A3_HUMAN
3	4612	RLWDHATMTEV	RLWDHATM[147]TEV/3	1537.33	A02	11	sp|Q9Y3F4|STRAP_HUMAN
10	15362	KVLDFEHFL	KVLDFEHFL/3	1536.2	A02	9	sp|P60660|MYL6_HUMAN
6	9120	FIADHCPTL	FIADHCPTL/2	1520	A02	9	sp|Q13098|CSN1_HUMAN
13	19646	SLSSVLSHV	SLSSVLSHV/2	1511.23	A02	9	sp|Q96LJ7|DHRS1_HUMAN
12	18130	LLLKGVEAV	LLLKGVEAV/2	1510.83	A02	9	sp|Q9UJV9|DDX41_HUMAN
15	22634	KMPEINAKV	KM[147]PEINAKV/2	1508.93	A02	9	sp|Q15011|HERP1_HUMAN
8	12062	FILPFIIAA	FILPFIIAA/2	1507.75	A02	9	sp|P00156|CYB_HUMAN
7	10536	ALADGVTMQV	ALADGVTM[147]QV/2	1505.14	A02	10	sp|Q9UBF2|COPG2_HUMAN
9	13541	ILNPYNLFL	ILNPYNLFL/2	1504.56	A02	9	sp|Q9UGL1|KDM5B_HUMAN
13	19550	WLEENVHEV	WLEENVHEV/2	1503.85	A02	9	sp|Q9BQ70|TCF25_HUMAN
13	19478	SLLDSCTKL	SLLDSCTKL/2	1498.31	A02	9	sp|P50991|TCPD_HUMAN
14	20953	YLDQTLPRA	YLDQTLPRA/2	1496.64	A02	9	sp|A8MPP1|D11L8_HUMAN
9	13380	YMVHIQVTL	YM[147]VHIQVTL/2	1486.67	A02	9	sp|P32970|CD70_HUMAN
10	14846	MLDSLRIYL	M[147]LDSLRIYL/2	1484.6	A02	9	sp|Q9Y4A5|TRRAP_HUMAN
12	17815	VLFENTDSVHL	VLFENTDSVHL/2	1484.58	A02	11	sp|P42696|RBM34_HUMAN
15	22237	GLIGQLDEV	GLIGQLDEV/2	1482.47	A02	9	sp|Q9UL15|BAG5_HUMAN
9	13294	RLIEETISI	RLIEETISI/2	1477.11	A02	9	sp|O95249|GOSR1_HUMAN
10	14694	LLAELPASV	LLAELPASV/2	1469.4	A02	9	sp|Q14254|FLOT2_HUMAN
13	19065	FLYIGIITI	FLYIGIITI/2	1466.54	A02	9	sp|P19397|CD53_HUMAN
11	16113	SLYPVLNFL	SLYPVLNFL/2	1464.82	A02	9	sp|Q96S52|PIGS_HUMAN
16	23365	GLNEEIARV	GLNEEIARV/2	1460.31	A02	9	sp|O14777|NDC80_HUMAN
10	14596	ALSDHHIYL	ALSDHHIYL/2	1459.6	A02	9	sp|P04075|ALDOA_HUMAN
15	21893	ALAEEVEQV	ALAEEVEQV/2	1459.53	A02	9	sp|Q9BQE5|APOL2_HUMAN
9	13101	ALWSLPLYL	ALWSLPLYL/2	1455.67	A02	9	sp|O15287|FANCG_HUMAN
12	17346	ALYPHLPPEA	ALYPHLPPEA/2	1445.5	A02	10	sp|Q13501|SQSTM_HUMAN
14	20153	KLFEGENEHL	KLFEGENEHL/2	1439.5	A02	10	sp|Q13576|IQGA2_HUMAN
5	7183	YLASLIRSV	YLASLIRSV/2	1436.6	A02	9	sp|P51665|PSMD7_HUMAN
14	20074	LLHSFVDSV	LLHSFVDSV/2	1433.86	A02	9	sp|Q12772|SRBP2_HUMAN
9	12886	LLATVLQAV	LLATVLQAV/2	1431.78	A02	9	sp|O60613|SEP15_HUMAN
12	17180	FINIVVHSV	FINIVVHSV/2	1431.67	A02	9	sp|Q96PY5|FMNL2_HUMAN
14	19955	AMIELVERL	AMIELVERL/2	1425.36	A02	9	sp|Q96DX7|TRI44_HUMAN
11	15612	KLYEQHHVV	KLYEQHHVV/3	1419.27	A02	9	sp|Q15392|DHC24_HUMAN
15	21245	QLQDFDWQV	QLQDFDWQV/2	1416.33	A02	9	sp|Q9NX08|COMD8_HUMAN
14	19814	LLDRIVSV	LLDRIVSV/2	1415.29	A02	8	sp|Q92621|NU205_HUMAN
10	14138	KLIGDTPIDTFL	KLIGDTPIDTFL/2	1413.8	A02	12	sp|P19793|RXRA_HUMAN
12	16942	VLASLIIRL	VLASLIIRL/2	1411.83	A02	9	sp|Q92878|RAD50_HUMAN
12	16870	KLQNLNIFL	KLQNLNIFL/2	1405.83	A02	9	sp|A0AVT1|UBA6_HUMAN
13	18252	VLMKDVQEI	VLM[147]KDVQEI/2	1404	A02	9	sp|Q9BRT6|LLPH_HUMAN
15	21047	FMLPDPQNI	FM[147]LPDPQNI/2	1403.13	A02	9	sp|Q8WW01|SEN15_HUMAN
10	14014	FVFETPFTL	FVFETPFTL/2	1401.4	A02	9	sp|Q96BY6|DOC10_HUMAN
13	18197	VLFSSPPVILL	VLFSSPPVILL/2	1399.77	A02	11	sp|P04156|PRIO_HUMAN
15	20990	TLIGLSIKV	TLIGLSIKV/2	1399.33	A02	9	sp|Q9Y3D0|MIP18_HUMAN
14	19521	ALVSTIIMV	ALVSTIIM[147]V/2	1394.36	A02	9	sp|Q96SN7|ORAI2_HUMAN
14	19456	KLHDVELHQV	KLHDVELHQV/3	1389.71	A02	10	sp|O14775|GBB5_HUMAN
15	20816	SLPDIKVYL	SLPDIKVYL/2	1387.73	A02	9	sp|O43566|RGS14_HUMAN
12	16649	YLTNEGIQYL	YLTNEGIQYL/2	1387.42	A02	10	sp|P46783|RS10_HUMAN
9	12485	GLMGAGIAQV	GLM[147]GAGIAQV/2	1387.22	A02	10	sp|P40939|ECHA_HUMAN
15	20793	SLLGDDALVQV	SLLGDDALVQV/2	1386.2	A02	11	sp|Q15393|SF3B3_HUMAN
12	16527	VLIKNLLVSV	VLIKNLLVSV/2	1377.25	A02	10	sp|Q9UPN3|MACF1_HUMAN
15	20555	LLDPNVKSIFV	LLDPNVKSIFV/2	1370.33	A02	11	sp|O43414|ERI3_HUMAN
15	20555	TLIDLPGITKV	TLIDLPGITKV/2	1370.33	A02	11	sp|P50570|DYN2_HUMAN
9	12306	ALAGVSFEI	ALAGVSFEI/2	1367.33	A02	9	sp|Q15155|NOMO1_HUMAN
8	10937	ALVDHVAEL	ALVDHVAEL/2	1367.12	A02	9	sp|B0I1T2|MYO1G_HUMAN
8	10928	VIMKSSPEV	VIM[147]KSSPEV/2	1366	A02	9	sp|Q9NRG0|CHRC1_HUMAN
8	10865	FLVQNIHTL	FLVQNIHTL/2	1358.12	A02	9	sp|Q8TDN6|BRX1_HUMAN
12	16233	VLIETLVTL	VLIETLVTL/2	1352.75	A02	9	sp|P23526|SAHH_HUMAN
12	16233	SLQEVAMFL	SLQEVAM[147]FL/2	1352.75	A02	9	sp|Q9BV73|CP250_HUMAN
7	9439	FLLPTGVYL	FLLPTGVYL/2	1348.43	A02	9	sp|O00329|PK3CD_HUMAN
10	13483	AMNGKSFSV	AM[147]NGKSFSV/2	1348.3	A02	9	sp|Q9H7F0|AT133_HUMAN
17	22894	SLQDEIQRV	SLQDEIQRV/2	1346.71	A02	9	sp|Q9UNX4|WDR3_HUMAN
13	17473	KLWKENPGL	KLWKENPGL/2	1344.08	A02	9	sp|Q92616|GCN1L_HUMAN
13	17471	KLIDETQDMLL	KLIDETQDM[147]LL/2	1343.92	A02	11	sp|Q5T4S7|UBR4_HUMAN
14	18798	RMWEDPMGA	RM[147]WEDPM[147]GA/2	1342.71	A02	9	sp|Q9ULX6|AKP8L_HUMAN
17	22807	ILYDKLEKI	ILYDKLEKI/3	1341.59	A02	9	sp|Q99832|TCPH_HUMAN
14	18774	FLDPNNIPKA	FLDPNNIPKA/2	1341	A02	10	sp|Q9BVK2|ALG8_HUMAN
12	16085	KLGDFGLATV	KLGDFGLATV/2	1340.42	A02	10	sp|Q8N568|DCLK2_HUMAN
4	5334	KLMGQIHQL	KLM[147]GQIHQL/3	1333.5	A02	9	sp|Q8TBA6|GOGA5_HUMAN
8	10616	LLLDVPTAAV	LLLDVPTAAV/2	1327	A02	10	sp|P13284|GILT_HUMAN
13	17238	VLFDVTGQVRL	VLFDVTGQVRL/2	1326	A02	11	sp|Q14764|MVP_HUMAN
14	18481	ALLEADVNIKL	ALLEADVNIKL/2	1320.07	A02	11	sp|P61011|SRP54_HUMAN
14	18428	SLHDALCVV	SLHDALCVV/2	1316.29	A02	9	sp|P17987|TCPA_HUMAN
14	18350	VLTEFTREV	VLTEFTREV/2	1310.71	A02	9	sp|Q96P70|IPO9_HUMAN
9	11789	ILFPLRFTL	ILFPLRFTL/2	1309.89	A02	9	sp|O43156|TTI1_HUMAN
11	14407	TLDEATPTL	TLDEATPTL/2	1309.73	A02	9	sp|Q15750|TAB1_HUMAN
16	20916	VLWTMVIHI	VLWTM[147]VIHI/2	1307.25	A02	9	sp|Q93050|VPP1_HUMAN
11	14333	KLHYVVTEV	KLHYVVTEV/2	1303	A02	9	sp|Q9Y4A5|TRRAP_HUMAN
13	16904	SLFPLLLRL	SLFPLLLRL/2	1300.31	A02	9	sp|Q13724|MOGS_HUMAN
14	18174	ALSDLEITL	ALSDLEITL/2	1298.14	A02	9	sp|Q96AC1|FERM2_HUMAN
15	19457	YLSVKVWDL	YLSVKVWDL/2	1297.13	A02	9	sp|Q66LE6|2ABD_HUMAN
3	3861	FLWDVNTLTAL	FLWDVNTLTAL/2	1287	A02	11	sp|Q8TAF3|WDR48_HUMAN
13	16717	AMIEGEIESL	AM[147]IEGEIESL/2	1285.92	A02	10	sp|Q9UHP3|UBP25_HUMAN
14	17973	GLFAPLVFL	GLFAPLVFL/2	1283.79	A02	9	sp|P53985|MOT1_HUMAN
10	12837	VLMDLKALLL	VLM[147]DLKALLL/2	1283.7	A02	10	sp|Q9UJV9|DDX41_HUMAN
11	14111	ALLSGIVSI	ALLSGIVSI/2	1282.82	A02	9	sp|Q13505|MTX1_HUMAN
16	20519	IIDGKIFCV	IIDGKIFCV/2	1282.44	A02	9	sp|P60510|PP4C_HUMAN
14	17925	TLQEVHFLL	TLQEVHFLL/2	1280.36	A02	9	sp|Q460N5|PAR14_HUMAN
10	12777	RLLPKVQEV	RLLPKVQEV/3	1277.7	A02	9	sp|Q86UD0|SAPC2_HUMAN
12	15329	KILDYEVTL	KILDYEVTL/2	1277.42	A02	9	sp|P40189|IL6RB_HUMAN
14	17855	KLWPEASKVKV	KLWPEASKVKV/3	1275.36	A02	11	sp|Q9NZJ4|SACS_HUMAN
6	7641	FILPSSLYL	FILPSSLYL/2	1273.5	A02	9	sp|Q9H2H9|S38A1_HUMAN
10	12714	FLLPHPGLQV	FLLPHPGLQV/2	1271.4	A02	10	sp|Q6DD88|ATLA3_HUMAN
15	19066	LLVPTSGIYFV	LLVPTSGIYFV/2	1271.07	A02	11	sp|P01374|TNFB_HUMAN
16	20325	NMYGKVVTV	NM[147]YGKVVTV/2	1270.31	A02	9	sp|O00267|SPT5H_HUMAN
12	15241	KLQEFLQTL	KLQEFLQTL/2	1270.08	A02	9	sp|Q9NVI1|FANCI_HUMAN
15	19049	KLILLITQV	KLILLITQV/2	1269.93	A02	9	sp|Q15061|WDR43_HUMAN
9	11425	HLAEVSAEV	HLAEVSAEV/2	1269.44	A02	9	sp|O95229|ZWINT_HUMAN
7	8882	YLTPLILTL	YLTPLILTL/2	1268.86	A02	9	sp|Q9NX61|T161A_HUMAN
13	16477	ALYPNVVQV	ALYPNVVQV/2	1267.46	A02	9	sp|Q6P158|DHX57_HUMAN
4	5063	TLMGHMLYL	TLM[147]GHM[147]LYL/2	1265.75	A02	9	sp|Q9Y450|HBS1L_HUMAN
15	18945	HLVPEVPTV	HLVPEVPTV/2	1263	A02	9	sp|O15156|ZBT7B_HUMAN
18	22724	TLDEKIEKV	TLDEKIEKV/2	1262.44	A02	9	sp|Q96GQ7|DDX27_HUMAN
14	17674	ALTDFVRSV	ALTDFVRSV/2	1262.43	A02	9	sp|O60888|CUTA_HUMAN
14	17636	FLPDPSALQNL	FLPDPSALQNL/2	1259.71	A02	11	sp|Q9NXR7|BRE_HUMAN
16	20071	ILNPEVVTV	ILNPEVVTV/2	1254.44	A02	9	sp|Q9UK61|F208A_HUMAN
16	20028	VLYEKDIQL	VLYEKDIQL/2	1251.75	A02	9	sp|Q9H8T0|AKTIP_HUMAN
9	11256	GLMKKAYEL	GLMKKAYEL/2	1250.67	A02	9	sp|Q02078|MEF2A_HUMAN
14	17381	ALHDILTEI	ALHDILTEI/2	1241.5	A02	9	sp|P40937|RFC5_HUMAN
14	17343	SLFKDQMEL	SLFKDQM[147]EL/2	1238.79	A02	9	sp|O15397|IPO8_HUMAN
15	18544	KLTSVLEAV	KLTSVLEAV/2	1236.27	A02	9	sp|P98198|AT8B2_HUMAN
17	20978	KLFKAPAYI	KLFKAPAYI/2	1234	A02	9	sp|Q14CB8|RHG19_HUMAN
17	20974	TLHGLQQYYV	TLHGLQQYYV/2	1233.77	A02	10	sp|O00148|DX39A_HUMAN
14	17229	KVLGIVVGV	KVLGIVVGV/2	1230.64	A02	9	sp|A5YKK6|CNOT1_HUMAN
12	14766	VLYPHEPTAV	VLYPHEPTAV/2	1230.5	A02	10	sp|Q9NYP3|DONS_HUMAN
13	15992	KMVSIQITL	KM[147]VSIQITL/2	1230.15	A02	9	sp|O00203|AP3B1_HUMAN
10	12278	TLSDIMVSL	TLSDIM[147]VSL/2	1227.8	A02	9	sp|Q9NXF1|TEX10_HUMAN
10	12255	KLLEPVLLL	KLLEPVLLL/2	1225.5	A02	9	sp|P62249|RS16_HUMAN
13	15874	ILDPHVVLL	ILDPHVVLL/2	1221.08	A02	9	sp|Q99567|NUP88_HUMAN
16	19520	KLYQEVEIASV	KLYQEVEIASV/2	1220	A02	11	sp|Q92900|RENT1_HUMAN
16	19519	TLWEIAKAEV	TLWEIAKAEV/2	1219.94	A02	10	sp|Q8TCX1|DC2L1_HUMAN
8	9695	KLLDIRSYL	KLLDIRSYL/2	1211.88	A02	9	sp|P51665|PSMD7_HUMAN
17	20569	TLVDFPLHL	TLVDFPLHL/2	1209.94	A02	9	sp|Q8WXG6|MADD_HUMAN
4	4812	YLSKIIPAL	YLSKIIPAL/2	1203	A02	9	sp|P40937|RFC5_HUMAN
14	16798	GLLDRLSVLL	GLLDRLSVLL/2	1199.86	A02	10	sp|Q9H0F7|ARL6_HUMAN
15	17997	ALAEALKEV	ALAEALKEV/2	1199.8	A02	9	sp|Q6PI26|SHQ1_HUMAN
8	9578	ALLPDLPAL	ALLPDLPAL/2	1197.25	A02	9	sp|Q8NC60|NOA1_HUMAN
16	19128	VLFELKLLL	VLFELKLLL/2	1195.5	A02	9	sp|Q8N1F7|NUP93_HUMAN
17	20273	NLLPKLHIV	NLLPKLHIV/2	1192.53	A02	9	sp|O00299|CLIC1_HUMAN
10	11899	FLDPGGPMMKL	FLDPGGPM[147]M[147]KL/2	1189.9	A02	11	sp|Q9NXE4|NSMA3_HUMAN
15	17833	ALINNIVEI	ALINNIVEI/2	1188.87	A02	9	sp|Q75V66|ANO5_HUMAN
16	19013	VLLESKILL	VLLESKILL/2	1188.31	A02	9	sp|Q5VZ89|DEN4C_HUMAN
13	15409	TLYEHNNEL	TLYEHNNEL/2	1185.31	A02	9	sp|Q9NRG9|AAAS_HUMAN
15	17520	VMGKIFAV	VM[147]GKIFAV/2	1168	A02	8	sp|Q9P2G9|KLHL8_HUMAN
12	13995	KLWEMDNML	KLWEM[147]DNM[147]L/2	1166.25	A02	9	sp|Q9Y605|MOFA1_HUMAN
16	18641	FLAKLIAQA	FLAKLIAQA/2	1165.06	A02	9	sp|P50990|TCPQ_HUMAN
13	15096	SLINVGLISV	SLINVGLISV/2	1161.23	A02	10	sp|Q92688|AN32B_HUMAN
11	12773	RLIPIIVLL	RLIPIIVLL/2	1161.18	A02	9	sp|B0I1T2|MYO1G_HUMAN
16	18568	SLVELLVQL	SLVELLVQL/2	1160.5	A02	9	sp|Q9H1A4|APC1_HUMAN
17	19662	ILSKDGVLYV	ILSKDGVLYV/2	1156.59	A02	10	sp|Q9H1A4|APC1_HUMAN
17	19652	SLADLQNDEV	SLADLQNDEV/2	1156	A02	10	sp|P61247|RS3A_HUMAN
19	21906	NLVSFLETV	NLVSFLETV/2	1152.95	A02	9	sp|Q9GZX9|TWSG1_HUMAN
16	18435	LLAEPVPGI	LLAEPVPGI/2	1152.19	A02	9	sp|P61088|UBE2N_HUMAN
15	17274	RIIDVVYNA	RIIDVVYNA/2	1151.6	A02	9	sp|P62241|RS8_HUMAN
15	17140	RLFNDPVAMV	RLFNDPVAM[147]V/2	1142.67	A02	10	sp|Q92685|ALG3_HUMAN
15	17133	KLHGVNINV	KLHGVNINV/2	1142.2	A02	9	sp|Q9BQ04|RBM4B_HUMAN
12	13681	MLLSVPLLL	M[147]LLSVPLLL/2	1140.08	A02	9	sp|P27797|CALR_HUMAN
16	18226	KLVKEVIAV	KLVKEVIAV/2	1139.12	A02	9	sp|P38117|ETFB_HUMAN
16	18219	KLLTEVHAA	KLLTEVHAA/2	1138.69	A02	9	sp|P78325|ADAM8_HUMAN
15	17037	SIYGGFLLGV	SIYGGFLLGV/2	1135.8	A02	10	sp|P35606|COPB2_HUMAN
14	15865	KLYPQLPAEI	KLYPQLPAEI/2	1133.21	A02	10	sp|Q9HCE0|EPG5_HUMAN
11	12446	KLIPLLLQL	KLIPLLLQL/2	1131.45	A02	9	sp|Q15155|NOMO1_HUMAN
17	19029	AIIDGKIFCV	AIIDGKIFCV/2	1119.35	A02	10	sp|P60510|PP4C_HUMAN
13	14506	ALNSKILSV	ALNSKILSV/2	1115.85	A02	9	sp|Q96NW4|ANR27_HUMAN
18	20027	SLQSTILGV	SLQSTILGV/2	1112.61	A02	9	sp|Q86WA8|LONP2_HUMAN
18	19817	KLIEKLDIKL	KLIEKLDIKL/3	1100.94	A02	10	sp|P13639|EF2_HUMAN
17	18700	FLLDPVKGERL	FLLDPVKGERL/3	1100	A02	11	sp|Q15149|PLEC_HUMAN
8	8787	ILAALTIFL	ILAALTIFL/2	1098.38	A02	9	sp|Q13315|ATM_HUMAN
16	17542	AIVDKVPSV	AIVDKVPSV/2	1096.38	A02	9	sp|Q9Y678|COPG1_HUMAN
18	19682	LLSHYLPDL	LLSHYLPDL/2	1093.44	A02	9	sp|Q9UL45|BL1S6_HUMAN
20	21847	ILFGHENRV	ILFGHENRV/3	1092.35	A02	9	sp|O14775|GBB5_HUMAN
16	17448	VLYGGLLEHL	VLYGGLLEHL/2	1090.5	A02	10	sp|Q86UT8|CCD84_HUMAN
17	18436	KVFDPVPVGV	KVFDPVPVGV/2	1084.47	A02	10	sp|Q08211|DHX9_HUMAN
16	17346	FLSLINVGL	FLSLINVGL/2	1084.12	A02	9	sp|Q92688|AN32B_HUMAN
14	15170	KLQEKIQEL	KLQEKIQEL/2	1083.57	A02	9	sp|Q02224|CENPE_HUMAN
13	13989	YVVPFVAKV	YVVPFVAKV/2	1076.08	A02	9	sp|A5YKK6|CNOT1_HUMAN
19	20412	ILHDDEVTV	ILHDDEVTV/2	1074.32	A02	9	sp|P05386|RLA1_HUMAN
20	21418	GLVGSLQEV	GLVGSLQEV/2	1070.9	A02	9	sp|Q9H1A4|APC1_HUMAN
17	18186	VLQDIQVML	VLQDIQVM[147]L/2	1069.77	A02	9	sp|P33992|MCM5_HUMAN
19	20217	ALYDNVEKL	ALYDNVEKL/2	1064.05	A02	9	sp|P08243|ASNS_HUMAN
18	19133	KLIAVLESI	KLIAVLESI/2	1062.94	A02	9	sp|Q9ULT8|HECD1_HUMAN
12	12731	ALFPGVALL	ALFPGVALL/2	1060.92	A02	9	sp|P30101|PDIA3_HUMAN
17	18001	RLLSFVVLA	RLLSFVVLA/2	1058.88	A02	9	sp|P43308|SSRB_HUMAN
17	17995	LLLDMQNRL	LLLDM[147]QNRL/2	1058.53	A02	9	sp|Q16531|DDB1_HUMAN
18	18983	TLIGIVLGL	TLIGIVLGL/2	1054.61	A02	9	sp|Q05086|UBE3A_HUMAN
17	17892	HLTDITLKV	HLTDITLKV/2	1052.47	A02	9	sp|Q15046|SYK_HUMAN
22	23153	GLIEILKKV	GLIEILKKV/2	1052.41	A02	9	sp|O14737|PDCD5_HUMAN
18	18924	GLIDVHVHL	GLIDVHVHL/2	1051.33	A02	9	sp|P27708|PYR1_HUMAN
12	12566	NLAKCIVSV	NLAKCIVSV/2	1047.17	A02	9	sp|Q96GQ5|CP058_HUMAN
9	9410	TLAKYLMEL	TLAKYLM[147]EL/2	1045.56	A02	9	sp|O95067|CCNB2_HUMAN
12	12534	YLFDRNGVCL	YLFDRNGVCL/2	1044.5	A02	10	sp|Q9Y5R8|TPPC1_HUMAN
19	19796	NIIELVHQV	NIIELVHQV/2	1041.89	A02	9	sp|P43405|KSYK_HUMAN
12	12494	LIWPLLSTV	LIWPLLSTV/2	1041.17	A02	9	sp|Q99567|NUP88_HUMAN
19	19765	SLYREILFL	SLYREILFL/2	1040.26	A02	9	sp|Q5VZ89|DEN4C_HUMAN
20	20801	SLIKQIPRI	SLIKQIPRI/2	1040.05	A02	9	sp|P62906|RL10A_HUMAN
19	19710	FLYTGEGDTV	FLYTGEGDTV/2	1037.37	A02	10	sp|P98170|XIAP_HUMAN
16	16584	YLLQEPPRTV	YLLQEPPRTV/2	1036.5	A02	10	sp|Q96IZ0|PAWR_HUMAN
15	15546	SLIEKVTQL	SLIEKVTQL/2	1036.4	A02	9	sp|Q9NS87|KIF15_HUMAN
19	19683	QLFSQQHFL	QLFSQQHFL/2	1035.95	A02	9	sp|O15417|TNC18_HUMAN
20	20698	VLYPHPPLA	VLYPHPPLA/2	1034.9	A02	9	sp|Q09019|DMWD_HUMAN
10	10307	RLFEGNALL	RLFEGNALL/2	1030.7	A02	9	sp|P46781|RS9_HUMAN
19	19487	TLADLRVLFGI	TLADLRVLFGI/2	1025.63	A02	11	sp|Q9UNY4|TTF2_HUMAN
20	20490	PLWGKVFYL	PLWGKVFYL/2	1024.5	A02	9	sp|Q9UBU7|DBF4A_HUMAN
6	6125	ALWGFFPVL	ALWGFFPVL/2	1020.83	A02	9	sp|Q9NPA0|EMC7_HUMAN
10	10196	FLSEHPNVTL	FLSEHPNVTL/2	1019.6	A02	10	sp|Q9UH17|ABC3B_HUMAN
16	16287	GMYGKIAVMEL	GM[147]YGKIAVM[147]EL/2	1017.94	A02	11	sp|Q16531|DDB1_HUMAN
9	9156	ILYPKTLFL	ILYPKTLFL/2	1017.33	A02	9	sp|Q08209|PP2BA_HUMAN
18	18239	ALPPVLTTV	ALPPVLTTV/2	1013.28	A02	9	sp|Q6PKG0|LARP1_HUMAN
15	15191	SLTGHISTV	SLTGHISTV/2	1012.73	A02	9	sp|O43660|PLRG1_HUMAN
13	13157	ALFGTILEL	ALFGTILEL/2	1012.08	A02	9	sp|P30679|GNA15_HUMAN
17	17147	ALPEIFTEL	ALPEIFTEL/2	1008.65	A02	9	sp|Q2VIR3|IF2GL_HUMAN
19	19141	GLLAGDRLVEV	GLLAGDRLVEV/2	1007.42	A02	11	sp|O14745|NHRF1_HUMAN
12	12073	ALASVIMGL	ALASVIM[147]GL/2	1006.08	A02	9	sp|P30153|2AAA_HUMAN
7	7034	RLYPWGVVEV	RLYPWGVVEV/2	1004.86	A02	10	sp|Q15019|SEPT2_HUMAN
19	19041	LLSPVVPQI	LLSPVVPQI/2	1002.16	A02	9	sp|Q8N1F7|NUP93_HUMAN
11	11021	YILDLQVVL	YILDLQVVL/2	1001.91	A02	9	sp|Q02535|ID3_HUMAN
14	14018	KLADQCTGL	KLADQCTGL/2	1001.29	A02	9	sp|Q71U36|TBA1A_HUMAN
14	13941	SLATSLPRL	SLATSLPRL/2	995.786	A02	9	sp|O43156|TTI1_HUMAN
7	6970	KLLPSVTEL	KLLPSVTEL/2	995.714	A02	9	sp|P21675|TAF1_HUMAN
14	13927	SLFERLVVL	SLFERLVVL/2	994.786	A02	9	sp|Q92900|RENT1_HUMAN
20	19859	QLIPKLIFL	QLIPKLIFL/2	992.95	A02	9	sp|Q6ZS81|WDFY4_HUMAN
23	22777	SLLENLEKI	SLLENLEKI/2	990.304	A02	9	sp|O60812|HNRCL_HUMAN
8	7917	LLMATILHL	LLM[147]ATILHL/2	989.625	A02	9	sp|P53618|COPB_HUMAN
18	17791	KIFPAALQLV	KIFPAALQLV/2	988.389	A02	10	sp|P22102|PUR2_HUMAN
12	11850	KLIANNTTV	KLIANNTTV/2	987.5	A02	9	sp|O96019|ACL6A_HUMAN
9	8848	LLLDVTPLSL	LLLDVTPLSL/2	983.111	A02	10	sp|P38646|GRP75_HUMAN
17	16675	TLAETLVNL	TLAETLVNL/2	980.882	A02	9	sp|Q8NB46|ANR52_HUMAN
15	14690	FLDGHDLQL	FLDGHDLQL/2	979.333	A02	9	sp|Q969V6|MKL1_HUMAN
17	16595	SLQERQVFL	SLQERQVFL/2	976.176	A02	9	sp|O43548|TGM5_HUMAN
23	22394	FLPLIVNTV	FLPLIVNTV/2	973.652	A02	9	sp|Q709C8|VP13C_HUMAN
21	20377	KLVEFDFLGA	KLVEFDFLGA/2	970.333	A02	10	sp|Q9Y6A5|TACC3_HUMAN
14	13544	FILPKEIAV	FILPKEIAV/2	967.429	A02	9	sp|Q9H1A4|APC1_HUMAN
3	2882	RLWEYLLEL	RLWEYLLEL/2	960.667	A02	9	sp|Q01082|SPTB2_HUMAN
22	21107	GLFAGPCKV	GLFAGPCKV/2	959.409	A02	9	sp|P78527|PRKDC_HUMAN
16	15344	ILQQHIATV	ILQQHIATV/2	959	A02	9	sp|Q9Y575|ASB3_HUMAN
23	21989	GLSTEGIYRV	GLSTEGIYRV/2	956.043	A02	10	sp|Q9NRY4|RHG35_HUMAN
19	18028	ALTGYLHTI	ALTGYLHTI/2	948.842	A02	9	sp|Q9NYY8|FAKD2_HUMAN
12	11385	YIIEVNARL	YIIEVNARL/2	948.75	A02	9	sp|P27708|PYR1_HUMAN
15	14137	FLLGPEGQHLL	FLLGPEGQHLL/2	942.467	A02	11	sp|Q53GL7|PAR10_HUMAN
20	18817	IMTEKELLAV	IM[147]TEKELLAV/2	940.85	A02	10	sp|Q14254|FLOT2_HUMAN
16	14927	ALIARVTNV	ALIARVTNV/2	932.938	A02	9	sp|Q9ULZ3|ASC_HUMAN
13	12082	RLTPKLMEV	RLTPKLM[147]EV/2	929.385	A02	9	sp|O15372|EIF3H_HUMAN
23	21267	LLDSAPLNV	LLDSAPLNV/2	924.652	A02	9	sp|Q8NI36|WDR36_HUMAN
21	19416	GLIGVGLINV	GLIGVGLINV/2	924.571	A02	10	sp|A3KN83|SBNO1_HUMAN
19	17501	TLTSKLYSL	TLTSKLYSL/2	921.105	A02	9	sp|Q9UDW1|QCR9_HUMAN
19	17482	FLNNQEYVL	FLNNQEYVL/2	920.105	A02	9	sp|Q01082|SPTB2_HUMAN
10	9198	FLADPSAFVAA	FLADPSAFVAA/2	919.8	A02	11	sp|Q8NHW5|RLA0L_HUMAN
21	19224	ALDTINILL	ALDTINILL/2	915.429	A02	9	sp|O14497|ARI1A_HUMAN
13	11892	VLLGLVVSL	VLLGLVVSL/2	914.769	A02	9	sp|Q9BTW9|TBCD_HUMAN
20	18289	ALFQPHLINV	ALFQPHLINV/2	914.45	A02	10	sp|P61160|ARP2_HUMAN
14	12786	FLHSLNIEM	FLHSLNIEM[147]/2	913.286	A02	9	sp|Q9UPP1|PHF8_HUMAN
14	12773	LLASINSTV	LLASINSTV/2	912.357	A02	9	sp|Q16531|DDB1_HUMAN
14	12773	GLYGLIVAL	GLYGLIVAL/2	912.357	A02	9	sp|P27449|VATL_HUMAN
7	6320	TVMGKIFAV	TVM[147]GKIFAV/2	902.857	A02	9	sp|Q9P2G9|KLHL8_HUMAN
17	15337	ALVSSLHLL	ALVSSLHLL/2	902.176	A02	9	sp|Q9Y678|COPG1_HUMAN
4	3605	YLYGQTTTYL	YLYGQTTTYL/2	901.25	A02	10	sp|P11388|TOP2A_HUMAN
23	20709	SLGKVFGV	SLGKVFGV/2	900.391	A02	8	sp|P54132|BLM_HUMAN
16	14394	KLWEAESKL	KLWEAESKL/2	899.625	A02	9	sp|Q9NYP9|MS18A_HUMAN
22	19772	VMQDPEFLQSV	VM[147]QDPEFLQSV/2	898.727	A02	11	sp|A2A3N6|PIPSL_HUMAN
18	16122	FLADVDKLKL	FLADVDKLKL/3	895.667	A02	10	sp|Q14008|CKAP5_HUMAN
10	8941	FLINTNSEL	FLINTNSEL/2	894.1	A02	9	sp|P27815|PDE4A_HUMAN
20	17881	KLGSVPVTV	KLGSVPVTV/2	894.05	A02	9	sp|Q9Y4C2|F115A_HUMAN
21	18774	YLVAEKVTV	YLVAEKVTV/2	894	A02	9	sp|Q14568|HS902_HUMAN
13	11519	GLAQVITAV	GLAQVITAV/2	886.077	A02	9	sp|Q9UKY1|ZHX1_HUMAN
23	20304	GLWGHPVLA	GLWGHPVLA/2	882.783	A02	9	sp|Q5VZ89|DEN4C_HUMAN
20	17609	KLWQTPLHV	KLWQTPLHV/2	880.45	A02	9	sp|Q8NB46|ANR52_HUMAN
8	7043	KLFPDTPLAL	KLFPDTPLAL/2	880.375	A02	10	sp|Q12906|ILF3_HUMAN
11	9682	KLYKNLLYL	KLYKNLLYL/2	880.182	A02	9	sp|Q6IPR1|LYRM5_HUMAN
17	14922	ALAELFGLLV	ALAELFGLLV/2	877.765	A02	10	sp|Q7Z6Z7|HUWE1_HUMAN
24	21016	GLATDVQTV	GLATDVQTV/2	875.667	A02	9	sp|P49720|PSB3_HUMAN
24	20897	MLPHAPGV	M[147]LPHAPGV/2	870.708	A02	8	sp|Q92769|HDAC2_HUMAN
21	18205	WLIEDGKVVTV	WLIEDGKVVTV/2	866.905	A02	11	sp|Q9Y266|NUDC_HUMAN
22	18957	GLFSAKLFL	GLFSAKLFL/2	861.682	A02	9	sp|Q14C86|GAPD1_HUMAN
26	22382	KLHLILDYV	KLHLILDYV/2	860.846	A02	9	sp|O75676|KS6A4_HUMAN
19	16336	ALQSLLHLL	ALQSLLHLL/2	859.789	A02	9	sp|P52294|IMA5_HUMAN
18	15403	LLASEVPQL	LLASEVPQL/2	855.722	A02	9	sp|Q6PJG6|BRAT1_HUMAN
25	21324	ALNGHVEMV	ALNGHVEM[147]V/2	852.96	A02	9	sp|Q8N8A2|ANR44_HUMAN
15	12753	YLPPATQVV	YLPPATQVV/2	850.2	A02	9	sp|P38919|IF4A3_HUMAN
7	5935	YVINDLTAV	YVINDLTAV/2	847.857	A02	9	sp|P52788|SPSY_HUMAN
25	21184	TLGNVLVTV	TLGNVLVTV/2	847.36	A02	9	sp|Q9NV70|EXOC1_HUMAN
16	13535	TLWYRPPEL	TLWYRPPEL/2	845.938	A02	9	sp|Q14004|CDK13_HUMAN
6	5042	FLYPFPLAL	FLYPFPLAL/2	840.333	A02	9	sp|Q5BJD5|TM41B_HUMAN
20	16776	NLYEACLTL	NLYEACLTL/2	838.8	A02	9	sp|Q9C0E2|XPO4_HUMAN
23	19237	RLAVYIDKV	RLAVYIDKV/2	836.391	A02	9	sp|P20700|LMNB1_HUMAN
26	21690	TLLNVIKSV	TLLNVIKSV/2	834.231	A02	9	sp|Q14643|ITPR1_HUMAN
25	20847	SLCPDLMEI	SLCPDLM[147]EI/2	833.88	A02	9	sp|Q9H8H0|NOL11_HUMAN
20	16677	YLTQVDILL	YLTQVDILL/2	833.85	A02	9	sp|Q8NCD3|HJURP_HUMAN
19	15830	ALLDVTPKAV	ALLDVTPKAV/2	833.158	A02	10	sp|Q9UDY2|ZO2_HUMAN
5	4164	MLFPGSIAL	M[147]LFPGSIAL/2	832.8	A02	9	sp|Q15691|MARE1_HUMAN
21	17420	YLVEINKILL	YLVEINKILL/2	829.524	A02	10	sp|P46939|UTRO_HUMAN
14	11612	ALANQKLYSV	ALANQKLYSV/2	829.429	A02	10	sp|Q9NU22|MDN1_HUMAN
15	12436	RLLEVPVML	RLLEVPVM[147]L/2	829.067	A02	9	sp|Q96AB3|ISOC2_HUMAN
26	21551	TLWNQELYI	TLWNQELYI/2	828.885	A02	9	sp|Q92917|GPKOW_HUMAN
22	18218	QLLPLIVNL	QLLPLIVNL/2	828.091	A02	9	sp|O00410|IPO5_HUMAN
25	20696	YLSDIPLHDA	YLSDIPLHDA/2	827.84	A02	10	sp|Q02153|GCYB1_HUMAN
22	18106	KMDDPDYWRTV	KMDDPDYWRTV/3	823	A02	11	sp|Q14137|BOP1_HUMAN
28	22869	QLVDIIEKV	QLVDIIEKV/2	816.75	A02	9	sp|P61289|PSME3_HUMAN
25	20395	GLWGTVVNI	GLWGTVVNI/2	815.8	A02	9	sp|Q86VV8|RTTN_HUMAN
26	21163	KLGHTDILVGV	KLGHTDILVGV/3	813.962	A02	11	sp|Q15024|EXOS7_HUMAN
25	20345	ALIDEGETDWKL	ALIDEGETDWKL/2	813.8	A02	12	sp|Q9H2U2|IPYR2_HUMAN
20	16165	LLIPGLATA	LLIPGLATA/2	808.25	A02	9	sp|O15239|NDUA1_HUMAN
26	20959	NIFPYPVGV	NIFPYPVGV/2	806.115	A02	9	sp|Q99590|SCAFB_HUMAN
27	21618	KIFDEILVNA	KIFDEILVNA/2	800.667	A02	10	sp|P11388|TOP2A_HUMAN
18	14373	ALLENMEGLFL	ALLENMEGLFL/2	798.5	A02	11	sp|P61923|COPZ1_HUMAN
26	20747	VLTNKLLTV	VLTNKLLTV/2	797.962	A02	9	sp|P37287|PIGA_HUMAN
24	19151	SLYSQVHQI	SLYSQVHQI/2	797.958	A02	9	sp|Q93074|MED12_HUMAN
25	19649	TIEDGIFEV	TIEDGIFEV/2	785.96	A02	9	sp|P54652|HSP72_HUMAN
25	19559	ALYVAVVNV	ALYVAVVNV/2	782.36	A02	9	sp|Q9BVK8|TM147_HUMAN
25	19546	RLIEQEEYL	RLIEQEEYL/2	781.84	A02	9	sp|Q9NTJ3|SMC4_HUMAN
22	17189	ALNEKLVNL	ALNEKLVNL/2	781.318	A02	9	sp|O00303|EIF3F_HUMAN
14	10933	KIFEMGPVFTL	KIFEM[147]GPVFTL/2	780.929	A02	11	sp|P00403|COX2_HUMAN
25	19456	SLLHLGALYGI	SLLHLGALYGI/2	778.24	A02	11	sp|O00767|ACOD_HUMAN
24	18547	ALSGTLSGV	ALSGTLSGV/2	772.792	A02	9	sp|P33992|MCM5_HUMAN
13	10038	RLNEKNYEL	RLNEKNYEL/2	772.154	A02	9	sp|Q9UI12|VATH_HUMAN
19	14620	SILRHVAEV	SILRHVAEV/2	769.474	A02	9	sp|P05198|IF2A_HUMAN
18	13832	RLQDELVTL	RLQDELVTL/2	768.444	A02	9	sp|Q9UPN3|MACF1_HUMAN
27	20717	QLIPALAKV	QLIPALAKV/2	767.296	A02	9	sp|O00167|EYA2_HUMAN
14	10735	RIINGIIISV	RIINGIIISV/2	766.786	A02	10	sp|Q96D96|HVCN1_HUMAN
15	11445	ALSELATAV	ALSELATAV/2	763	A02	9	sp|Q9BWL3|CA043_HUMAN
29	22127	LLYDLADQLHA	LLYDLADQLHA/2	763	A02	11	sp|P13804|ETFA_HUMAN
26	19723	VMFGGKQVVV	VM[147]FGGKQVVV/2	758.577	A02	10	sp|O43865|SAHH2_HUMAN
11	8336	SLYKGLLSV	SLYKGLLSV/2	757.818	A02	9	sp|Q9Y620|RA54B_HUMAN
23	17345	TLSDLRVYL	TLSDLRVYL/2	754.13	A02	9	sp|Q9BYN0|SRXN1_HUMAN
22	16547	TLLGHEFVL	TLLGHEFVL/2	752.136	A02	9	sp|P30260|CDC27_HUMAN
27	20268	KLLEGEECRL	KLLEGEECRL/3	750.667	A02	10	sp|P02538|K2C6A_HUMAN
13	9739	MLANDIARL	M[147]LANDIARL/2	749.154	A02	9	sp|Q9H4M9|EHD1_HUMAN
17	12728	YLHREVVEL	YLHREVVEL/2	748.706	A02	9	sp|Q9H1B5|XYLT2_HUMAN
25	18714	AIQDKLFQV	AIQDKLFQV/2	748.56	A02	9	sp|Q9BRQ6|CHCH6_HUMAN
18	13460	ILIRPLVSV	ILIRPLVSV/2	747.778	A02	9	sp|O75027|ABCB7_HUMAN
20	14935	KLSDLQTQL	KLSDLQTQL/2	746.75	A02	9	sp|P19387|RPB3_HUMAN
22	16402	ILNPLLTLL	ILNPLLTLL/2	745.545	A02	9	sp|O60684|IMA7_HUMAN
20	14818	ALAGDQPSV	ALAGDQPSV/2	740.9	A02	9	sp|P21333|FLNA_HUMAN
21	15550	KLYNPENIYL	KLYNPENIYL/2	740.476	A02	10	sp|P23258|TBG1_HUMAN
28	20655	LLEPFVHQV	LLEPFVHQV/2	737.679	A02	9	sp|Q9UHH9|IP6K2_HUMAN
14	10301	ALTNLVFAL	ALTNLVFAL/2	735.786	A02	9	sp|O15067|PUR4_HUMAN
28	20529	KLISELQKL	KLISELQKL/2	733.179	A02	9	sp|Q5UIP0|RIF1_HUMAN
27	19664	VLLRVLILL	VLLRVLILL/2	728.296	A02	9	sp|O14672|ADA10_HUMAN
28	20361	FLFNTENKL	FLFNTENKL/2	727.179	A02	9	sp|Q13907|IDI1_HUMAN
31	22516	QMISRIEYI	QM[147]ISRIEYI/2	726.323	A02	9	sp|P48730|KC1D_HUMAN
30	21779	HLANIVERV	HLANIVERV/2	725.967	A02	9	sp|Q8IYM9|TRI22_HUMAN
16	11594	ALFPHLLQPVL	ALFPHLLQPVL/2	724.625	A02	11	sp|P55060|XPO2_HUMAN
28	20155	ALIGSLVGA	ALIGSLVGA/2	719.821	A02	9	sp|Q86XK7|VSIG1_HUMAN
12	8588	AIMDLLLRL	AIMDLLLRL/2	715.667	A02	9	sp|Q9UPN7|PP6R1_HUMAN
19	13590	RIIDTVAQV	RIIDTVAQV/2	715.263	A02	9	sp|Q9UKK3|PARP4_HUMAN
17	12123	FLLQLTELTL	FLLQLTELTL/2	713.118	A02	10	sp|P0C7T4|HMSDV_HUMAN
16	11387	KLQNIMMLL	KLQNIM[147]M[147]LL/2	711.688	A02	9	sp|Q9NRZ9|HELLS_HUMAN
13	9236	RLFDEPQLASL	RLFDEPQLASL/2	710.462	A02	11	sp|Q9H0C5|BTBD1_HUMAN
22	15568	YVLPEVSKV	YVLPEVSKV/2	707.636	A02	9	sp|Q9UI10|EI2BD_HUMAN
28	19769	RLLDSEIKI	RLLDSEIKI/2	706.036	A02	9	sp|P17980|PRS6A_HUMAN
21	14735	KILPTLEAV	KILPTLEAV/2	701.667	A02	9	sp|Q12905|ILF2_HUMAN
22	15393	KIAQFLESV	KIAQFLESV/2	699.682	A02	9	sp|Q9NU22|MDN1_HUMAN
13	9080	GLWGPVHEL	GLWGPVHEL/2	698.462	A02	9	sp|Q9Y4C2|F115A_HUMAN
29	20189	VLNNVVIHL	VLNNVVIHL/2	696.172	A02	9	sp|P42858|HD_HUMAN
26	18092	HLAEALHQA	HLAEALHQA/2	695.846	A02	9	sp|Q9BWS9|CHID1_HUMAN
22	15266	ALLNVELEL	ALLNVELEL/2	693.909	A02	9	sp|Q99832|TCPH_HUMAN
14	9700	GLAGFTLLL	GLAGFTLLL/2	692.857	A02	9	sp|Q9BVT8|TMUB1_HUMAN
31	21432	ILQEKLQEI	ILQEKLQEI/2	691.355	A02	9	sp|Q4LE39|ARI4B_HUMAN
19	13061	GVIDGHIYAV	GVIDGHIYAV/2	687.421	A02	10	sp|Q14145|KEAP1_HUMAN
24	16496	ALFPERITV	ALFPERITV/2	687.333	A02	9	sp|Q5SQI0|ATAT_HUMAN
27	18497	RLPEIYIQL	RLPEIYIQL/2	685.074	A02	9	sp|Q9H223|EHD4_HUMAN
12	8173	KLWGQSIQL	KLWGQSIQL/2	681.083	A02	9	sp|Q5T5J6|SWT1_HUMAN
16	10892	MLLATLLLLLL	MLLATLLLLLL/3	680.75	A02	11	sp|Q7Z4F1|LRP10_HUMAN
30	20390	FLDENVHFF	FLDENVHFF/2	679.667	A02	9	sp|Q86TI2|DPP9_HUMAN
32	21744	TLLAAEFLKQV	TLLAAEFLKQV/2	679.5	A02	11	sp|Q99832|TCPH_HUMAN
24	16274	FASHVSPEV	FASHVSPEV/2	678.083	A02	9	sp|Q9NP61|ARFG3_HUMAN
5	3369	KLLEATSAV	KLLEATSAV/2	673.8	A02	9	sp|Q504U0|CD046_HUMAN
24	16170	ILDSRGNPTV	ILDSRGNPTV/2	673.75	A02	10	sp|P13929|ENOB_HUMAN
27	18191	ALLEKGITEA	ALLEKGITEA/2	673.741	A02	10	sp|P41229|KDM5C_HUMAN
30	20194	TLLTAIVKL	TLLTAIVKL/2	673.133	A02	9	sp|P63010|AP2B1_HUMAN
31	20867	LLLDVPTAAVQA	LLLDVPTAAVQA/2	673.129	A02	12	sp|P13284|GILT_HUMAN
21	14117	RLQESVMEA	RLQESVM[147]EA/2	672.238	A02	9	sp|O60216|RAD21_HUMAN
21	14102	YLLTHPPPIM	YLLTHPPPIM[147]/2	671.524	A02	10	sp|Q7Z6Z7|HUWE1_HUMAN
30	20139	NLYPFVKTV	NLYPFVKTV/2	671.3	A02	9	sp|P31939|PUR9_HUMAN
26	17424	GLWGQSVPTA	GLWGQSVPTA/2	670.154	A02	10	sp|Q9UBN6|TR10D_HUMAN
9	5995	KLIDRTESL	KLIDRTESL/2	666.111	A02	9	sp|P33241|LSP1_HUMAN
18	11953	YIFPLDDKAAV	YIFPLDDKAAV/2	664.056	A02	11	sp|Q9UKK3|PARP4_HUMAN
11	7301	ALLKGLAAV	ALLKGLAAV/2	663.727	A02	9	sp|Q9P2H5|UBP35_HUMAN
10	6589	LLIENVASL	LLIENVASL/2	658.9	A02	9	sp|P07203|GPX1_HUMAN
22	14480	HLLPTAPTTV	HLLPTAPTTV/2	658.182	A02	10	sp|Q6VMQ6|MCAF1_HUMAN
30	19740	ALIEAEKVAQV	ALIEAEKVAQV/2	658	A02	11	sp|O94905|ERLN2_HUMAN
33	21603	GIWGFIKGV	GIWGFIKGV/2	654.636	A02	9	sp|Q96M27|PRRC1_HUMAN
17	11106	GLAKAVASV	GLAKAVASV/2	653.294	A02	9	sp|P57678|GEMI4_HUMAN
17	11078	LLAETHYQL	LLAETHYQL/2	651.647	A02	9	sp|P49321|NASP_HUMAN
32	20836	GLADASLLKKV	GLADASLLKKV/2	651.125	A02	11	sp|Q9UBB4|ATX10_HUMAN
24	15534	KLVNILVQL	KLVNILVQL/2	647.25	A02	9	sp|Q9NR09|BIRC6_HUMAN
30	19380	GLLDPGMLVNI	GLLDPGM[147]LVNI/2	646	A02	11	sp|P49116|NR2C2_HUMAN
34	21902	ILTDITKGV	ILTDITKGV/2	644.176	A02	9	sp|P13639|EF2_HUMAN
21	13463	SIIGRLLEV	SIIGRLLEV/2	641.095	A02	9	sp|P62136|PP1A_HUMAN
7	4471	FLANIGTSV	FLANIGTSV/2	638.714	A02	9	sp|Q9UKG1|DP13A_HUMAN
25	15922	ALNEQIARL	ALNEQIARL/2	636.88	A02	9	sp|O14777|NDC80_HUMAN
27	17166	ALITTILHL	ALITTILHL/2	635.778	A02	9	sp|Q6R327|RICTR_HUMAN
29	18401	GLAPPQHLIRV	GLAPPQHLIRV/3	634.517	A02	11	sp|P04637|P53_HUMAN
26	16489	ALLETVNRL	ALLETVNRL/2	634.192	A02	9	sp|Q8IWJ2|GCC2_HUMAN
26	16454	SLFPGQVVI	SLFPGQVVI/2	632.846	A02	9	sp|Q14181|DPOA2_HUMAN
21	13287	TLFPGKVHSL	TLFPGKVHSL/3	632.714	A02	10	sp|Q9NNW5|WDR6_HUMAN
34	21426	TLFHDPWKLLI	TLFHDPWKLLI/2	630.176	A02	11	sp|O95243|MBD4_HUMAN
32	20163	LMTKEISSV	LM[147]TKEISSV/2	630.094	A02	9	sp|P78527|PRKDC_HUMAN
22	13797	ALAPGLPTA	ALAPGLPTA/2	627.136	A02	9	sp|Q9UMX5|NENF_HUMAN
3	1878	VLWDRTFSL	VLWDRTFSL/2	626	A02	9	sp|P42224|STAT1_HUMAN
16	10004	RLSSVNAEV	RLSSVNAEV/2	625.25	A02	9	sp|Q14246|EMR1_HUMAN
34	21169	TMAKESSIIGV	TMAKESSIIGV/2	622.618	A02	11	sp|Q08257|QOR_HUMAN
35	21739	VLYDQPRHV	VLYDQPRHV/3	621.114	A02	9	sp|Q93074|MED12_HUMAN
32	19850	FLTKQEILL	FLTKQEILL/2	620.312	A02	9	sp|Q99828|CIB1_HUMAN
31	19211	VLFLGELYL	VLFLGELYL/2	619.71	A02	9	sp|Q9H074|PAIP1_HUMAN
37	22889	VLTGILEQV	VLTGILEQV/2	618.622	A02	9	sp|Q96QK1|VPS35_HUMAN
19	11746	ALSGHVSTV	ALSGHVSTV/2	618.211	A02	9	sp|Q9Y283|INVS_HUMAN
27	16667	ALYSAEHGL	ALYSAEHGL/2	617.296	A02	9	sp|Q07864|DPOE1_HUMAN
35	21589	SLGRFEITV	SLGRFEITV/2	616.829	A02	9	sp|P53677|AP3M2_HUMAN
24	14776	SLWHLPLLL	SLWHLPLLL/2	615.667	A02	9	sp|Q12887|COX10_HUMAN
23	14142	FLDESRSTQYM	FLDESRSTQYM[147]/2	614.87	A02	11	sp|Q9Y230|RUVB2_HUMAN
32	19615	FLASESLIKQI	FLASESLIKQI/2	612.969	A02	11	sp|P62906|RL10A_HUMAN
22	13419	LLDKLYAL	LLDKLYAL/2	609.955	A02	8	sp|Q9NV31|IMP3_HUMAN
3	1828	FLWPGLNVPL	FLWPGLNVPL/2	609.333	A02	10	sp|P82675|RT05_HUMAN
25	15165	LLDHVLLTL	LLDHVLLTL/2	606.6	A02	9	sp|Q9Y490|TLN1_HUMAN
26	15734	RLHDENILL	RLHDENILL/3	605.154	A02	9	sp|Q68CZ1|FTM_HUMAN
34	20459	VLMTEDIKL	VLM[147]TEDIKL/2	601.735	A02	9	sp|Q04637|IF4G1_HUMAN
26	15593	ALFEGKVQL	ALFEGKVQL/2	599.731	A02	9	sp|Q8NEZ3|WDR19_HUMAN
32	19072	KIQEILTQV	KIQEILTQV/2	596	A02	9	sp|O00425|IF2B3_HUMAN
37	21955	LLANIVPIA	LLANIVPIA/2	593.378	A02	9	sp|P03901|NU4LM_HUMAN
19	11271	LLLPGELAKHAV	LLLPGELAKHAV/3	593.211	A02	12	sp|Q96A08|H2B1A_HUMAN
25	14554	ALIEGVGILL	ALIEGVGILL/2	582.16	A02	10	sp|O60830|TI17B_HUMAN
34	19790	TLTNIIHNL	TLTNIIHNL/2	582.059	A02	9	sp|Q9P0S3|ORML1_HUMAN
37	21490	IQDKCVPLV	IQDKCVPLV/2	580.811	A02	9	sp|Q9BS26|ERP44_HUMAN
38	22054	TMIEICEKL	TM[147]IEICEKL/2	580.368	A02	9	sp|P50579|MAP2_HUMAN
7	4051	ILAAHVPTL	ILAAHVPTL/2	578.714	A02	9	sp|P30049|ATPD_HUMAN
32	18516	SLLPQLTGA	SLLPQLTGA/2	578.625	A02	9	sp|P55160|NCKPL_HUMAN
24	13879	ALHDHLATI	ALHDHLATI/2	578.292	A02	9	sp|Q02153|GCYB1_HUMAN
34	19634	YLGIVELLV	YLGIVELLV/2	577.471	A02	9	sp|P25963|IKBA_HUMAN
28	16147	QLLQHVQAV	QLLQHVQAV/2	576.679	A02	9	sp|Q86Y56|HEAT2_HUMAN
26	14952	RLVPSVNGV	RLVPSVNGV/2	575.077	A02	9	sp|P11586|C1TC_HUMAN
37	21214	ILISKLLGA	ILISKLLGA/2	573.351	A02	9	sp|Q9NYK1|TLR7_HUMAN
15	8596	KLAEKLTIL	KLAEKLTIL/2	573.067	A02	9	sp|Q9Y2A7|NCKP1_HUMAN
34	19451	GLDALKVTV	GLDALKVTV/2	572.088	A02	9	sp|P52789|HXK2_HUMAN
31	17734	KLGEIVTTI	KLGEIVTTI/2	572.065	A02	9	sp|P84077|ARF1_HUMAN
10	5716	FLLFASSTLTL	FLLFASSTLTL/2	571.6	A02	11	reverse_sp|O75072|FKTN_HUMAN
15	8573	FLAEDPKVTL	FLAEDPKVTL/2	571.533	A02	10	sp|Q9HC16|ABC3G_HUMAN
32	18097	RLQEDPPVGV	RLQEDPPVGV/2	565.531	A02	10	sp|P63146|UBE2B_HUMAN
8	4523	FLAEHPNVTL	FLAEHPNVTL/2	565.375	A02	10	sp|Q96AK3|ABC3D_HUMAN
33	18638	LLPEGPPAI	LLPEGPPAI/2	564.788	A02	9	sp|Q15011|HERP1_HUMAN
19	10722	SLAQYNPKL	SLAQYNPKL/2	564.316	A02	9	sp|Q92569|P55G_HUMAN
34	19108	VLQRSLVTV	VLQRSLVTV/2	562	A02	9	sp|O60645|EXOC3_HUMAN
24	13475	RLFPGAPPTA	RLFPGAPPTA/2	561.458	A02	10	sp|P17535|JUND_HUMAN
29	16142	RLISKFDTV	RLISKFDTV/3	556.621	A02	9	sp|P06730|IF4E_HUMAN
20	11111	SLYGGTITI	SLYGGTITI/2	555.55	A02	9	sp|Q5VTR2|BRE1A_HUMAN
31	17189	SLLNVVMDL	SLLNVVM[147]DL/2	554.484	A02	9	sp|Q14839|CHD4_HUMAN
25	13858	VLVPGHLQSV	VLVPGHLQSV/2	554.32	A02	10	sp|Q9UKI9|PO2F3_HUMAN
39	21614	SLTGRLDEV	SLTGRLDEV/2	554.205	A02	9	sp|P42226|STAT6_HUMAN
26	14409	KLLDPEDVAVQL	KLLDPEDVAVQL/2	554.192	A02	12	sp|P46939|UTRO_HUMAN
16	8857	RLLNILMQL	RLLNILM[147]QL/2	553.562	A02	9	sp|P28370|SMCA1_HUMAN
25	13824	SLLPPDALVGL	SLLPPDALVGL/2	552.96	A02	11	sp|Q15437|SC23B_HUMAN
35	19331	TMITHQILL	TM[147]ITHQILL/2	552.314	A02	9	sp|Q13395|TARB1_HUMAN
30	16471	ALFPAPLAQI	ALFPAPLAQI/2	549.033	A02	10	sp|Q8ND24|RN214_HUMAN
31	16983	NLFNKYPAL	NLFNKYPAL/2	547.839	A02	9	sp|P13797|PLST_HUMAN
33	17996	GLLGTLVQL	GLLGTLVQL/2	545.333	A02	9	sp|P35222|CTNB1_HUMAN
30	16312	TLFPVRLLV	TLFPVRLLV/2	543.733	A02	9	sp|Q8NF37|PCAT1_HUMAN
39	21180	ALTELLAKI	ALTELLAKI/2	543.077	A02	9	sp|P30279|CCND2_HUMAN
26	14096	SLLPEGPPAI	SLLPEGPPAI/2	542.154	A02	10	sp|Q15011|HERP1_HUMAN
30	16143	ALAGHQDGITFI	ALAGHQDGITFI/2	538.1	A02	12	sp|Q8TEB1|DCA11_HUMAN
18	9676	ALFKAWAL	ALFKAWAL/2	537.556	A02	8	sp|Q15306|IRF4_HUMAN
45	24124	FLKNELDNV	FLKNELDNV/2	536.089	A02	9	sp|Q9BWF2|TRAIP_HUMAN
40	21417	GQFPSYLETV	GQFPSYLETV/2	535.425	A02	10	sp|Q86Y56|HEAT2_HUMAN
26	13911	KTLERSYLL	KTLERSYLL/2	535.038	A02	9	sp|P23921|RIR1_HUMAN
43	22975	TLQEFLERI	TLQEFLERI/2	534.302	A02	9	sp|Q9NSI8|SAMN1_HUMAN
35	18698	QLSPRLLEV	QLSPRLLEV/2	534.229	A02	9	sp|Q460N5|PAR14_HUMAN
24	12745	SLDPHAQVAV	SLDPHAQVAV/2	531.042	A02	10	sp|P35573|GDE_HUMAN
13	6858	ALLPSSPTL	ALLPSSPTL/2	527.538	A02	9	sp|Q92994|TF3B_HUMAN
34	17839	GLCERLVSL	GLCERLVSL/2	524.676	A02	9	sp|P78527|PRKDC_HUMAN
30	15698	SLWPSPEQL	SLWPSPEQL/2	523.267	A02	9	sp|Q8TAE8|G45IP_HUMAN
37	19302	TLTNVIHNL	TLTNVIHNL/2	521.676	A02	9	sp|Q53FV1|ORML2_HUMAN
18	9264	GLADRCPAL	GLADRCPAL/2	514.667	A02	9	sp|Q9H469|FXL15_HUMAN
28	14407	VLADLKVQL	VLADLKVQL/2	514.536	A02	9	sp|Q9NQP4|PFD4_HUMAN
40	20512	VLSSRLAFA	VLSSRLAFA/2	512.8	A02	9	sp|P79483|DRB3_HUMAN
5	2555	SLMSHAIEL	SLM[147]SHAIEL/2	511	A02	9	sp|Q9Y263|PLAP_HUMAN
12	6055	KLLEGEESRISL	KLLEGEESRISL/3	504.583	A02	12	sp|P08670|VIME_HUMAN
18	9067	FIHQHFVEV	FIHQHFVEV/2	503.722	A02	9	sp|O94889|KLH18_HUMAN
41	20640	GLAKLIADV	GLAKLIADV/2	503.415	A02	9	sp|P39748|FEN1_HUMAN
11	5529	KVMELLVHL	KVM[147]ELLVHL/3	502.636	A02	9	sp|Q5VYK3|ECM29_HUMAN
39	19574	SMTLAIHEI	SM[147]TLAIHEI/2	501.897	A02	9	sp|O15121|DEGS1_HUMAN
23	11369	SLWKEVSEL	SLWKEVSEL/2	494.304	A02	9	sp|Q03933|HSF2_HUMAN
30	14805	FLEEREIAL	FLEEREIAL/2	493.5	A02	9	sp|O14980|XPO1_HUMAN
41	20201	ALFQRPPLI	ALFQRPPLI/2	492.707	A02	9	sp|O60832|DKC1_HUMAN
28	13684	NIMDFKLFL	NIM[147]DFKLFL/2	488.714	A02	9	sp|A6NFY4|T194B_HUMAN
34	16505	RLQEDPPAGV	RLQEDPPAGV/2	485.441	A02	10	sp|P49459|UBE2A_HUMAN
39	18847	SLWFKPEEL	SLWFKPEEL/2	483.256	A02	9	sp|P22392|NDKB_HUMAN
30	14386	NLFNRYPAL	NLFNRYPAL/2	479.533	A02	9	sp|P13796|PLSL_HUMAN
40	19180	YIYDKDMEII	YIYDKDM[147]EII/2	479.5	A02	10	sp|Q9UPT9|UBP22_HUMAN
28	13245	ALFEAAREVTL	ALFEAAREVTL/2	473.036	A02	11	sp|P42858|HD_HUMAN
45	21278	RLFDEPQLA	RLFDEPQLA/2	472.844	A02	9	sp|Q9H0C5|BTBD1_HUMAN
14	6603	RLWPKIQGL	RLWPKIQGL/2	471.643	A02	9	sp|Q9NX09|DDIT4_HUMAN
36	16932	FVYDPLVDWTA	FVYDPLVDWTA/2	470.333	A02	11	sp|Q96Q15|SMG1_HUMAN
38	17767	TVFEGRIYV	TVFEGRIYV/2	467.553	A02	9	sp|O94889|KLH18_HUMAN
34	15797	RMFDGKFVVA	RMFDGKFVVA/2	464.618	A02	10	sp|Q8TAS1|UHMK1_HUMAN
26	11984	GLWEDGRSTLL	GLWEDGRSTLL/2	460.923	A02	11	sp|Q96BA8|CR3L1_HUMAN
7	3212	IVMEHVVFL	IVM[147]EHVVFL/2	458.857	A02	9	sp|Q75V66|ANO5_HUMAN
24	10951	VLFEGRTVQL	VLFEGRTVQL/2	456.292	A02	10	sp|Q9UPW5|CBPC1_HUMAN
38	17143	VLADQEVRL	VLADQEVRL/2	451.132	A02	9	sp|O43566|RGS14_HUMAN
12	5411	ALLDHDLAL	ALLDHDLAL/2	450.917	A02	9	sp|Q8NI27|THOC2_HUMAN
21	9436	VLTDTTAEL	VLTDTTAEL/2	449.333	A02	9	sp|Q9UBQ7|GRHPR_HUMAN
46	20546	VIINQIYEA	VIINQIYEA/2	446.652	A02	9	sp|Q15027|ACAP1_HUMAN
45	20059	GLTSTDLLFHL	GLTSTDLLFHL/2	445.756	A02	11	sp|Q14181|DPOA2_HUMAN
23	10128	FLHETGGAMV	FLHETGGAM[147]V/2	440.348	A02	10	sp|Q8IVB4|SL9A9_HUMAN
8	3488	RLQEVTHSV	RLQEVTHSV/2	436	A02	9	sp|P26010|ITB7_HUMAN
41	17859	HLLNESPML	HLLNESPM[147]L/2	435.585	A02	9	sp|Q92621|NU205_HUMAN
20	8693	SLIGHLQTL	SLIGHLQTL/2	434.65	A02	9	sp|Q16690|DUS5_HUMAN
28	12165	FVFPGELLL	FVFPGELLL/2	434.464	A02	9	sp|Q15758|AAAT_HUMAN
27	11688	ALSPHNILL	ALSPHNILL/2	432.889	A02	9	sp|Q8TEA7|TBCK_HUMAN
43	18604	GLAPKPVQV	GLAPKPVQV/2	432.651	A02	9	sp|Q6ZNJ1|NBEL2_HUMAN
14	6052	AIIESTPEL	AIIESTPEL/2	432.286	A02	9	sp|O60271|JIP4_HUMAN
45	19435	ALFSGPLVQA	ALFSGPLVQA/2	431.889	A02	10	sp|Q9H1K6|MESD1_HUMAN
20	8598	FIIQGLRSV	FIIQGLRSV/2	429.9	A02	9	sp|P01906|DQA2_HUMAN
42	17991	KLTEVHEEL	KLTEVHEEL/2	428.357	A02	9	sp|Q9UJC3|HOOK1_HUMAN
38	16275	RLFEVPHELVA	RLFEVPHELVA/3	428.289	A02	11	sp|Q9Y3M8|STA13_HUMAN
22	9305	ALYPGQLVQL	ALYPGQLVQL/2	422.955	A02	10	sp|Q9BRR9|RHG09_HUMAN
36	15142	FLLGPRLVLA	FLLGPRLVLA/2	420.611	A02	10	sp|P49755|TMEDA_HUMAN
49	20531	TLLVVVPKL	TLLVVVPKL/2	419	A02	9	sp|P21283|VATC1_HUMAN
15	6281	SLYGGNAVVEL	SLYGGNAVVEL/2	418.733	A02	11	sp|O75787|RENR_HUMAN
46	19212	ALGTVTNV	ALGTVTNV/2	417.652	A02	8	sp|Q8N3C0|ASCC3_HUMAN
34	14191	ALAAALAHI	ALAAALAHI/2	417.382	A02	9	sp|Q9NR30|DDX21_HUMAN
45	18766	SLWGQPAEA	SLWGQPAEA/2	417.022	A02	9	sp|P29400|CO4A5_HUMAN
45	18714	YLDIKGLLDV	YLDIKGLLDV/2	415.867	A02	10	sp|P63208|SKP1_HUMAN
52	21484	LLFEGEKITI	LLFEGEKITI/2	413.154	A02	10	sp|Q9GZM3|RPB1B_HUMAN
31	12796	GLLGAGGTVSV	GLLGAGGTVSV/2	412.774	A02	11	sp|Q3ZCQ8|TIM50_HUMAN
51	20918	RQLEEEGITFV	RQLEEEGITFV/2	410.157	A02	11	sp|Q92503|S14L1_HUMAN
42	17113	RLLEDKKITV	RLLEDKKITV/3	407.452	A02	10	sp|Q9UDY8|MALT1_HUMAN
47	19114	FIYHGEVPQA	FIYHGEVPQA/2	406.681	A02	10	sp|P33076|C2TA_HUMAN
48	19497	VLWMAPDGLYA	VLWM[147]APDGLYA/2	406.188	A02	11	sp|Q15306|IRF4_HUMAN
51	20662	QLYNQIIKL	QLYNQIIKL/2	405.137	A02	9	sp|O76094|SRP72_HUMAN
46	18613	GLDPLGYEIQL	GLDPLGYEIQL/2	404.63	A02	11	sp|P57740|NU107_HUMAN
24	9682	RLAGADVVLGV	RLAGADVVLGV/2	403.417	A02	11	sp|P27708|PYR1_HUMAN
17	6851	RLIPTLVSI	RLIPTLVSI/2	403	A02	9	sp|Q96P70|IPO9_HUMAN
56	22538	HLYSEVKEV	HLYSEVKEV/2	402.464	A02	9	sp|Q7Z333|SETX_HUMAN
31	12392	RLWGEPVNL	RLWGEPVNL/2	399.742	A02	9	sp|Q93008|USP9X_HUMAN
35	13971	ALYGQPLLL	ALYGQPLLL/2	399.171	A02	9	sp|Q13107|UBP4_HUMAN
48	19122	TLLEEIKAL	TLLEEIKAL/2	398.375	A02	9	sp|Q6QEF8|CORO6_HUMAN
29	11469	HIIENIVAV	HIIENIVAV/2	395.483	A02	9	sp|O76021|RL1D1_HUMAN
35	13734	RLIEETQIFQM	RLIEETQIFQM[147]/2	392.4	A02	11	sp|Q68D86|C102B_HUMAN
50	19502	LLYVNVIGL	LLYVNVIGL/2	390.04	A02	9	sp|Q4J6C6|PPCEL_HUMAN
15	5834	KLIAQNLEL	KLIAQNLEL/2	388.933	A02	9	sp|P52732|KIF11_HUMAN
31	12054	AIDPHLLLSV	AIDPHLLLSV/2	388.839	A02	10	sp|Q29RF7|PDS5A_HUMAN
47	18215	ALYHLAIKL	ALYHLAIKL/2	387.553	A02	9	sp|Q9UKA4|AKA11_HUMAN
52	20142	SILEDPPSI	SILEDPPSI/2	387.346	A02	9	sp|Q9NVM9|ASUN_HUMAN
18	6972	KVANIIAEV	KVANIIAEV/2	387.333	A02	9	sp|P52306|GDS1_HUMAN
51	19736	SMAGVVVRA	SM[147]AGVVVRA/2	386.98	A02	9	sp|P52272|HNRPM_HUMAN
14	5415	LLASIVSEL	LLASIVSEL/2	386.786	A02	9	sp|O75592|MYCB2_HUMAN
44	17018	RLPDDDPTAV	RLPDDDPTAV/2	386.773	A02	10	sp|Q9UBF2|COPG2_HUMAN
40	15400	ILDEPTNHL	ILDEPTNHL/2	385	A02	9	sp|Q9NUQ8|ABCF3_HUMAN
42	16133	SLSFMNPRL	SLSFM[147]NPRL/2	384.119	A02	9	sp|Q9Y2T2|AP3M1_HUMAN
55	21076	LLFPQIEGIKI	LLFPQIEGIKI/2	383.2	A02	11	sp|Q8NEZ5|FBX22_HUMAN
46	17626	LLQEVEHQL	LLQEVEHQL/2	383.174	A02	9	sp|O94972|TRI37_HUMAN
23	8813	LLSHVIVAL	LLSHVIVAL/2	383.174	A02	9	sp|Q13535|ATR_HUMAN
42	15966	ILSGIGVSQV	ILSGIGVSQV/2	380.143	A02	10	sp|P46977|STT3A_HUMAN
38	14444	ALLAGSEYLKL	ALLAGSEYLKL/2	380.105	A02	11	sp|O15371|EIF3D_HUMAN
19	7200	SLLPPTALVGL	SLLPPTALVGL/2	378.947	A02	11	sp|Q15436|SC23A_HUMAN
61	23000	LLPAIVHI	LLPAIVHI/2	377.049	A02	8	sp|Q92841|DDX17_HUMAN
24	8982	KLTDVGIATL	KLTDVGIATL/2	374.25	A02	10	sp|Q86TB3|ALPK2_HUMAN
21	7826	GLAAGGIVAV	GLAAGGIVAV/2	372.667	A02	10	sp|Q9ULH7|MKL2_HUMAN
57	21240	ILGIQPPSV	ILGIQPPSV/2	372.632	A02	9	sp|Q9UPN6|SCAF8_HUMAN
46	17141	KLFIGGLNV	KLFIGGLNV/2	372.63	A02	9	sp|Q13151|ROA0_HUMAN
24	8936	ILAQQPLSV	ILAQQPLSV/2	372.333	A02	9	sp|Q6ZRI6|CO039_HUMAN
54	19946	HLVDFDCHL	HLVDFDCHL/2	369.37	A02	9	sp|Q9Y3B6|EMC9_HUMAN
62	22847	VINDECYQV	VINDECYQV/2	368.5	A02	9	sp|Q29RF7|PDS5A_HUMAN
45	16552	FAMTDVLDV	FAMTDVLDV/2	367.822	A02	9	reverse_sp|Q8WZ42|TITIN_HUMAN
42	15399	FALPVGLIVGV	FALPVGLIVGV/2	366.643	A02	11	sp|P20333|TNR1B_HUMAN
49	17938	GLLPEPNILQL	GLLPEPNILQL/2	366.082	A02	11	sp|Q8IY67|RAVR1_HUMAN
17	6215	ALAQRLLEV	ALAQRLLEV/2	365.588	A02	9	sp|Q6ZMZ3|SYNE3_HUMAN
63	22936	ILDKKVEKV	ILDKKVEKV/2	364.063	A02	9	sp|Q58FF7|H90B3_HUMAN
61	22143	TLTEEGVIKV	TLTEEGVIKV/2	363	A02	10	sp|Q9BZE4|NOG1_HUMAN
52	18697	KISEVVELL	KISEVVELL/2	359.558	A02	9	sp|P52701|MSH6_HUMAN
42	15087	ALADLQEAVKL	ALADLQEAVKL/2	359.214	A02	11	sp|Q9C0D5|TANC1_HUMAN
39	13951	HLIPMAILL	HLIPM[147]AILL/2	357.718	A02	9	sp|Q9BVV6|TALD3_HUMAN
44	15677	ALLQQVHSA	ALLQQVHSA/2	356.295	A02	9	sp|Q86XN7|PRSR1_HUMAN
22	7828	RLVDLLLVL	RLVDLLLVL/2	355.818	A02	9	sp|Q9ULT8|HECD1_HUMAN
40	14189	NLANVVLLL	NLANVVLLL/2	354.725	A02	9	sp|Q92620|PRP16_HUMAN
45	15902	ALSSLAVVV	ALSSLAVVV/2	353.378	A02	9	sp|Q5VW36|FOCAD_HUMAN
22	7634	FIYPSNMQTML	FIYPSNM[147]QTM[147]L/2	347	A02	11	sp|Q7Z417|NUFP2_HUMAN
46	15946	FLWKEPATM	FLWKEPATM[147]/2	346.652	A02	9	sp|Q9BQ70|TCF25_HUMAN
60	20781	FLFQEPRSI	FLFQEPRSI/2	346.35	A02	9	sp|Q9UK61|F208A_HUMAN
16	5539	VLIGSNHSL	VLIGSNHSL/2	346.188	A02	9	sp|O15027|SC16A_HUMAN
64	21941	GLDDIKDLKV	GLDDIKDLKV/2	342.828	A02	10	sp|Q9HCE1|MOV10_HUMAN
7	2373	ALLGQTFSL	ALLGQTFSL/2	339	A02	9	sp|Q8IX01|SUGP2_HUMAN
37	12539	SIIQRLLEV	SIIQRLLEV/2	338.892	A02	9	sp|P36873|PP1G_HUMAN
65	22003	NMVAKVDEV	NM[147]VAKVDEV/2	338.508	A02	9	sp|P62906|RL10A_HUMAN
53	17930	KLHSEDIEL	KLHSEDIEL/2	338.302	A02	9	sp|Q9UPU5|UBP24_HUMAN
38	12853	RLLHEVQEL	RLLHEVQEL/2	338.237	A02	9	sp|Q13561|DCTN2_HUMAN
42	14163	KLSDVWKEL	KLSDVWKEL/2	337.214	A02	9	sp|Q8NB16|MLKL_HUMAN
58	19257	GILTKELLHSV	GILTKELLHSV/2	332.017	A02	11	sp|Q9Y217|MTMR6_HUMAN
48	15909	SLSPIYPAA	SLSPIYPAA/2	331.438	A02	9	sp|P18858|DNLI1_HUMAN
49	16235	LLYDDKGVGL	LLYDDKGVGL/2	331.327	A02	10	sp|Q8IXT5|RB12B_HUMAN
39	12865	TVLPFVSTV	TVLPFVSTV/2	329.872	A02	9	sp|P26010|ITB7_HUMAN
39	12847	FLRNINEYL	FLRNINEYL/2	329.41	A02	9	sp|Q96CU9|FXRD1_HUMAN
42	13704	KLGEFAKVLEL	KLGEFAKVLEL/2	326.286	A02	11	sp|P30153|2AAA_HUMAN
65	20952	ALLSRLEQI	ALLSRLEQI/2	322.338	A02	9	sp|Q9UKM9|RALY_HUMAN
53	16969	GLLNRPNPLL	GLLNRPNPLL/2	320.17	A02	10	sp|Q96AD5|PLPL2_HUMAN
15	4775	KVWGNVVTV	KVWGNVVTV/2	318.333	A02	9	sp|O43390|HNRPR_HUMAN
65	20614	SLVENIERLKV	SLVENIERLKV/2	317.138	A02	11	sp|Q12899|TRI26_HUMAN
53	16444	LLIDDKGTIKL	LLIDDKGTIKL/3	310.264	A02	11	sp|P06493|CDK1_HUMAN
71	21949	ALLGDLTKA	ALLGDLTKA/2	309.141	A02	9	sp|Q92973|TNPO1_HUMAN
73	22261	TLLTKPVEI	TLLTKPVEI/2	304.945	A02	9	sp|P19174|PLCG1_HUMAN
42	12777	GLSDLRLEL	GLSDLRLEL/2	304.214	A02	9	sp|Q96A65|EXOC4_HUMAN
66	19951	GLAPHLEQI	GLAPHLEQI/2	302.288	A02	9	sp|Q8TEX9|IPO4_HUMAN
43	12982	ALIEGAGILL	ALIEGAGILL/2	301.907	A02	10	sp|Q99595|TI17A_HUMAN
32	9648	FIQEIEHAL	FIQEIEHAL/2	301.5	A02	9	sp|Q96A65|EXOC4_HUMAN
65	19547	GLDRNAPSV	GLDRNAPSV/2	300.723	A02	9	sp|Q12996|CSTF3_HUMAN
60	17755	VLSNVEVTL	VLSNVEVTL/2	295.917	A02	9	sp|Q14204|DYHC1_HUMAN
58	17101	ALKDFVASI	ALKDFVASI/2	294.845	A02	9	sp|P25205|MCM3_HUMAN
44	12901	ALTSVVVTL	ALTSVVVTL/2	293.205	A02	9	sp|Q00534|CDK6_HUMAN
37	10832	ALTPVVVTL	ALTPVVVTL/2	292.757	A02	9	sp|P11802|CDK4_HUMAN
50	14560	AALPNVYEV	AALPNVYEV/2	291.2	A02	9	sp|P33992|MCM5_HUMAN
17	4936	HLLHTVPAL	HLLHTVPAL/2	290.353	A02	9	sp|Q9Y4B6|VPRBP_HUMAN
42	12187	RLYQEVHRL	RLYQEVHRL/3	290.167	A02	9	sp|Q92932|PTPR2_HUMAN
65	18465	IIADMDKWTV	IIADM[147]DKWTV/2	284.077	A02	10	sp|Q8TF40|FNIP1_HUMAN
74	20717	ITTDVLYTI	ITTDVLYTI/2	279.959	A02	9	sp|P14866|HNRPL_HUMAN
67	18633	SLIAKVATA	SLIAKVATA/2	278.104	A02	9	sp|Q92526|TCPW_HUMAN
59	16387	YLGNINPQM	YLGNINPQM[147]/2	277.746	A02	9	sp|O15042|SR140_HUMAN
29	8039	RLLPDTINSINL	RLLPDTINSINL/2	277.207	A02	12	sp|Q14008|CKAP5_HUMAN
82	22469	QLVRDLLEV	QLVRDLLEV/2	274.012	A02	9	sp|P19838|NFKB1_HUMAN
66	18009	RLGEAEGLMKV	RLGEAEGLM[147]KV/3	272.864	A02	11	sp|Q9HBR0|S38AA_HUMAN
19	5183	RLINQVLEL	RLINQVLEL/2	272.789	A02	9	sp|Q9UIL1|SCOC_HUMAN
34	9247	FILPDSLPLDTL	FILPDSLPLDTL/2	271.971	A02	12	sp|P62314|SMD1_HUMAN
69	18668	ALTGIPLPLI	ALTGIPLPLI/2	270.551	A02	10	sp|P24941|CDK2_HUMAN
34	9140	TLVDNISTMAL	TLVDNISTM[147]AL/2	268.824	A02	11	sp|Q9NPJ3|ACO13_HUMAN
57	15294	HLTYLNVYL	HLTYLNVYL/2	268.316	A02	9	sp|Q92620|PRP16_HUMAN
14	3747	MLHSVTLFL	M[147]LHSVTLFL/2	267.643	A02	9	sp|O15127|SCAM2_HUMAN
78	20743	ILTESEIKL	ILTESEIKL/2	265.936	A02	9	sp|Q99598|TSNAX_HUMAN
84	22325	NLISALEEA	NLISALEEA/2	265.774	A02	9	sp|P22102|PUR2_HUMAN
69	18157	VLTGLSIRL	VLTGLSIRL/2	263.145	A02	9	sp|Q6SPF0|SAMD1_HUMAN
48	12620	ALYSKGILL	ALYSKGILL/2	262.917	A02	9	sp|O75694|NU155_HUMAN
62	16222	LLGELPRLLLL	LLGELPRLLLL/2	261.645	A02	11	sp|P08174|DAF_HUMAN
5	1308	MLATRVFSL	M[147]LATRVFSL/2	261.6	A02	9	sp|P13073|COX41_HUMAN
78	20018	ALWEDEGVRA	ALWEDEGVRA/2	256.641	A02	10	sp|P63092|GNAS2_HUMAN
88	22151	TLISELVQA	TLISELVQA/2	251.716	A02	9	sp|Q14999|CUL7_HUMAN
33	8305	RLLEQKVEL	RLLEQKVEL/2	251.667	A02	9	sp|Q9H307|PININ_HUMAN
72	18058	ALEPIDITV	ALEPIDITV/2	250.806	A02	9	sp|O60216|RAD21_HUMAN
86	21351	TLIEELKTL	TLIEELKTL/2	248.267	A02	9	sp|P18846|ATF1_HUMAN
50	12372	RVIGTLEEV	RVIGTLEEV/2	247.44	A02	9	sp|P46060|RAGP1_HUMAN
14	3461	MLAWINESL	M[147]LAWINESL/2	247.214	A02	9	sp|Q15691|MARE1_HUMAN
75	18412	KLQELENRL	KLQELENRL/3	245.493	A02	9	sp|Q8WXH0|SYNE2_HUMAN
14	3419	ALFQHITAL	ALFQHITAL/2	244.214	A02	9	sp|Q9P055|JKAMP_HUMAN
15	3661	AMAASPHAV	AM[147]AASPHAV/2	244.067	A02	9	sp|Q13151|ROA0_HUMAN
40	9756	KIMTEKELLAV	KIM[147]TEKELLAV/2	243.9	A02	11	sp|Q14254|FLOT2_HUMAN
47	11457	LLYQEGAKMAV	LLYQEGAKM[147]AV/2	243.766	A02	11	sp|P14923|PLAK_HUMAN
9	2186	FLLPLRIAL	FLLPLRIAL/2	242.889	A02	9	sp|Q86UL3|GPAT4_HUMAN
85	20369	GLLGQEGLVEI	GLLGQEGLVEI/2	239.635	A02	11	sp|Q53GL7|PAR10_HUMAN
56	13385	ALIPIPLAVI	ALIPIPLAVI/2	239.018	A02	10	sp|P19256|LFA3_HUMAN
82	19597	QLDDLKVEL	QLDDLKVEL/2	238.988	A02	9	sp|P42766|RL35_HUMAN
38	9050	RLLDRKVLL	RLLDRKVLL/2	238.158	A02	9	sp|Q9H4A5|GLP3L_HUMAN
32	7579	ALAWLDVTL	ALAWLDVTL/2	236.844	A02	9	sp|Q6P9H5|GIMA6_HUMAN
96	22709	GLPRFGIEMV	GLPRFGIEM[147]V/2	236.552	A02	10	sp|Q9H2Y7|ZN106_HUMAN
52	12232	KLWDPRTPCNA	KLWDPRTPCNA/3	235.231	A02	11	sp|O43684|BUB3_HUMAN
34	7913	KLFQGQLVL	KLFQGQLVL/2	232.735	A02	9	sp|O94782|UBP1_HUMAN
7	1621	FLAELPGSLSL	FLAELPGSLSL/2	231.571	A02	11	sp|Q9UPG8|PLAL2_HUMAN
85	19629	TIIDLPGITRV	TIIDLPGITRV/2	230.929	A02	11	sp|P20592|MX2_HUMAN
93	21465	SLCHVLPDL	SLCHVLPDL/2	230.806	A02	9	sp|Q13263|TIF1B_HUMAN
42	9672	ALDKATVLL	ALDKATVLL/2	230.286	A02	9	sp|Q53EL6|PDCD4_HUMAN
69	15815	KLAELKQECL	KLAELKQECL/2	229.203	A02	10	sp|P82979|SARNP_HUMAN
59	13446	QLFQGVLTL	QLFQGVLTL/2	227.898	A02	9	sp|Q9Y5L0|TNPO3_HUMAN
22	5008	VLMQDSRLYL	VLM[147]QDSRLYL/2	227.636	A02	10	sp|P06493|CDK1_HUMAN
86	19537	SLNGLEVHL	SLNGLEVHL/2	227.174	A02	9	sp|Q9NQG7|HPS4_HUMAN
82	18592	ALIRLDDLFL	ALIRLDDLFL/2	226.732	A02	10	sp|Q9NRX1|PNO1_HUMAN
86	19394	YLEELPEKLKL	YLEELPEKLKL/3	225.512	A02	11	sp|P09488|GSTM1_HUMAN
13	2902	RLWNETVEL	RLWNETVEL/2	223.231	A02	9	sp|Q8WUY9|DEP1B_HUMAN
78	17300	ILAPVVKEI	ILAPVVKEI/2	221.795	A02	9	sp|P46940|IQGA1_HUMAN
37	8104	FAIDPHLLLSV	FAIDPHLLLSV/2	219.027	A02	11	sp|Q29RF7|PDS5A_HUMAN
83	18090	ALLSGLREA	ALLSGLREA/2	217.952	A02	9	sp|O60341|KDM1A_HUMAN
73	15742	AILKYIETL	AILKYIETL/2	215.644	A02	9	sp|O75122|CLAP2_HUMAN
45	9677	FTVPRVVAV	FTVPRVVAV/2	215.044	A02	9	sp|Q9Y4A5|TRRAP_HUMAN
45	9644	LLIGTDVSL	LLIGTDVSL/2	214.311	A02	9	sp|Q9Y4B6|VPRBP_HUMAN
25	5310	LLAPRPVAV	LLAPRPVAV/2	212.4	A02	9	sp|P49918|CDN1C_HUMAN
59	12391	TVAPFNPTV	TVAPFNPTV/2	210.017	A02	9	sp|Q96BU1|S1PBP_HUMAN
63	13229	GLKEGIPAL	GLKEGIPAL/2	209.984	A02	9	sp|P13639|EF2_HUMAN
42	8731	LLDVPTAAV	LLDVPTAAV/2	207.881	A02	9	sp|P13284|GILT_HUMAN
81	16794	VMTLVSTYL	VM[147]TLVSTYL/2	207.333	A02	9	sp|Q9UNL2|SSRG_HUMAN
12	2471	RLMDPPSNEAV	RLM[147]DPPSNEAV/2	205.917	A02	11	sp|Q9H2U1|DHX36_HUMAN
72	14781	AIVRSLPSV	AIVRSLPSV/2	205.292	A02	9	sp|O14983|AT2A1_HUMAN
21	4258	KVLERVNAV	KVLERVNAV/2	202.762	A02	9	sp|Q9UL46|PSME2_HUMAN
111	22277	DLLNLITEV	DLLNLITEV/2	200.694	A02	9	reverse_sp|Q6XPR3|RPTN_HUMAN
83	16621	ALAKIEIKL	ALAKIEIKL/2	200.253	A02	9	sp|P0C7P4|UCRIL_HUMAN
97	19396	KMADEDALRKI	KM[147]ADEDALRKI/3	199.959	A02	11	sp|Q5VTR2|BRE1A_HUMAN
80	15920	ALVDQRELYL	ALVDQRELYL/2	199	A02	10	sp|Q9UL33|TPC2L_HUMAN
88	17314	ALLNIKVKL	ALLNIKVKL/2	196.75	A02	9	sp|P05783|K1C18_HUMAN
43	8429	RLFNDPVAMVL	RLFNDPVAM[147]VL/2	196.023	A02	11	sp|Q92685|ALG3_HUMAN
101	19553	GLVSRLLEA	GLVSRLLEA/2	193.594	A02	9	sp|Q99973|TEP1_HUMAN
118	22544	VLEYVIKV	VLEYVIKV/2	191.051	A02	8	sp|P43355|MAGA1_HUMAN
108	20450	LLGPPPVGV	LLGPPPVGV/2	189.352	A02	9	sp|Q9ULV3|CIZ1_HUMAN
120	22653	GLTEVLKEI	GLTEVLKEI/2	188.775	A02	9	sp|Q9H792|PEAK1_HUMAN
109	20478	IQDNHDGTYTV	IQDNHDGTYTV/2	187.872	A02	11	sp|P21333|FLNA_HUMAN
31	5788	RLHQINIYL	RLHQINIYL/2	186.71	A02	9	sp|Q8IXK2|GLT12_HUMAN
55	10088	RLMQGDEICL	RLM[147]QGDEICL/2	183.418	A02	10	sp|Q92900|RENT1_HUMAN
110	19880	FTFEGKLEAA	FTFEGKLEAA/2	180.727	A02	10	sp|P55786|PSA_HUMAN
51	9176	RLLKSKYLL	RLLKSKYLL/3	179.922	A02	9	reverse_sp|P10620|MGST1_HUMAN
78	13901	SVGSVLLTV	SVGSVLLTV/2	178.218	A02	9	sp|P55290|CAD13_HUMAN
8	1424	FLLPTGLSSL	FLLPTGLSSL/2	178	A02	10	sp|A9UHW6|MI4GD_HUMAN
95	16877	VLQQHLETL	VLQQHLETL/2	177.653	A02	9	sp|Q9NP66|HM20A_HUMAN
73	12875	FVFPGELL	FVFPGELL/2	176.37	A02	8	sp|Q15758|AAAT_HUMAN
123	21056	AMLKEVCTA	AM[147]LKEVCTA/2	171.187	A02	9	sp|P61011|SRP54_HUMAN
101	17272	GLKNGVPAV	GLKNGVPAV/2	171.01	A02	9	sp|P53621|COPA_HUMAN
35	5982	KLYQTPLEL	KLYQTPLEL/2	170.914	A02	9	sp|P52948|NUP98_HUMAN
108	18292	RLQEKVESA	RLQEKVESA/2	169.37	A02	9	sp|Q09161|NCBP1_HUMAN
49	8007	RLIQESPTL	RLIQESPTL/2	163.408	A02	9	sp|Q6P1A2|MBOA5_HUMAN
31	5052	SLAGSLRSV	SLAGSLRSV/2	162.968	A02	9	sp|Q8TE82|S3TC1_HUMAN
111	18036	VLDNVKMNL	VLDNVKM[147]NL/2	162.486	A02	9	sp|Q7Z4Q2|HEAT3_HUMAN
76	12154	FLVGERVTL	FLVGERVTL/2	159.921	A02	9	sp|P26641|EF1G_HUMAN
83	13140	SMDLGIPAM	SMDLGIPAM[147]/2	158.313	A02	9	sp|Q9BX93|PG12B_HUMAN
147	23202	FLNDRVPNC	FLNDRVPNC/2	157.837	A02	9	sp|Q8TBC4|UBA3_HUMAN
76	11681	SLDQPTQTV	SLDQPTQTV/2	153.697	A02	9	sp|Q99613|EIF3C_HUMAN
58	8898	SLAGDVALQQL	SLAGDVALQQL/2	153.414	A02	11	sp|Q15021|CND1_HUMAN
107	16410	GLDPNKPPEL	GLDPNKPPEL/2	153.364	A02	10	sp|Q9ULL5|PRR12_HUMAN
134	20528	FLDNGPKTI	FLDNGPKTI/2	153.194	A02	9	sp|P78344|IF4G2_HUMAN
86	13093	TLAEIAKVEL	TLAEIAKVEL/2	152.244	A02	10	sp|Q15233|NONO_HUMAN
14	2123	ALWAGLLTL	ALWAGLLTL/2	151.643	A02	9	sp|P06734|FCER2_HUMAN
136	20358	VLGGKAFLEHL	VLGGKAFLEHL/2	149.691	A02	11	sp|Q8TAP6|CEP76_HUMAN
24	3588	AIAPIIAAV	AIAPIIAAV/2	149.5	A02	9	sp|Q9BQ52|RNZ2_HUMAN
127	18738	SLIRNLEQL	SLIRNLEQL/2	147.543	A02	9	sp|Q15833|STXB2_HUMAN
147	21548	ILGPKPQGV	ILGPKPQGV/2	146.585	A02	9	sp|Q8NHS3|MFSD8_HUMAN
10	1458	IVAPGTFEV	IVAPGTFEV/2	145.8	A02	9	sp|Q12905|ILF2_HUMAN
17	2453	SLAEGRLYL	SLAEGRLYL/2	144.294	A02	9	sp|Q7Z3E5|ARMC9_HUMAN
109	15728	FVIRNIVEA	FVIRNIVEA/2	144.294	A02	9	sp|Q5JNZ5|RS26L_HUMAN
97	13926	NIIPIIISL	NIIPIIISL/2	143.567	A02	9	sp|P42695|CNDD3_HUMAN
126	17501	WLLPTDIQA	WLLPTDIQA/2	138.897	A02	9	sp|Q92499|DDX1_HUMAN
96	13091	LLDVTPLSL	LLDVTPLSL/2	136.365	A02	9	sp|P38646|GRP75_HUMAN
24	3186	VMAPRTVLL	VM[147]APRTVLL/2	132.75	A02	9	sp|P01889|1B07_HUMAN
113	14945	ALLQSDVRL	ALLQSDVRL/2	132.257	A02	9	sp|Q15149|PLEC_HUMAN
69	9098	KLPTPTSSV	KLPTPTSSV/2	131.855	A02	9	sp|Q9BTA9|WAC_HUMAN
105	13786	LLPPVTLAA	LLPPVTLAA/2	131.295	A02	9	sp|Q15274|NADC_HUMAN
162	20967	YCAEIAHNV	YCAEIAHNV/2	129.426	A02	9	sp|P62910|RL32_HUMAN
121	15544	LLDIRSYL	LLDIRSYL/2	128.463	A02	8	sp|P51665|PSMD7_HUMAN
23	2940	RLSEVQASL	RLSEVQASL/2	127.826	A02	9	sp|Q9NXW2|DJB12_HUMAN
155	19798	NIFPNPEATFV	NIFPNPEATFV/2	127.729	A02	11	sp|Q9Y5B9|SP16H_HUMAN
132	16824	ILINDAGEVRL	ILINDAGEVRL/2	127.455	A02	11	sp|Q92918|M4K1_HUMAN
41	5192	SLAQSLLPEM	SLAQSLLPEM[147]/2	126.634	A02	10	reverse_sp|Q9UPP2|IQEC3_HUMAN
146	18469	ILDISEHTL	ILDISEHTL/2	126.5	A02	9	sp|Q9UBU7|DBF4A_HUMAN
167	20222	TLSPRPPLI	TLSPRPPLI/2	121.09	A02	9	sp|Q9H0R1|AP5M1_HUMAN
33	3983	ILANNCPAL	ILANNCPAL/2	120.697	A02	9	sp|P62888|RL30_HUMAN
72	8683	GIMKKAYEL	GIM[147]KKAYEL/2	120.597	A02	9	sp|P11831|SRF_HUMAN
163	19449	GLAEDSPKM	GLAEDSPKM[147]/2	119.319	A02	9	sp|Q63HN8|RN213_HUMAN
168	20000	ALDPLADKILI	ALDPLADKILI/2	119.048	A02	11	sp|Q9UJA2|CRLS1_HUMAN
78	9270	KLSLVAAMLLL	KLSLVAAMLLL/2	118.846	A02	11	sp|P11021|GRP78_HUMAN
147	17282	KLKPGDLVGV	KLKPGDLVGV/2	117.565	A02	10	sp|P17980|PRS6A_HUMAN
172	19728	QVFPGLLERV	QVFPGLLERV/2	114.698	A02	10	sp|Q9UBB4|ATX10_HUMAN
178	20188	HLSIINEYL	HLSIINEYL/2	113.416	A02	9	sp|P46940|IQGA1_HUMAN
151	17095	KLSEVNKRL	KLSEVNKRL/3	113.212	A02	9	sp|Q8NCF5|NF2IP_HUMAN
5	559	RLMNDMTAV	RLM[147]NDM[147]TAV/2	111.8	A02	9	sp|Q92598|HS105_HUMAN
31	3433	KVVALVHAV	KVVALVHAV/2	110.742	A02	9	sp|P24001|IL32_HUMAN
19	2099	YLRGGAITEV	YLRGGAITEV/2	110.474	A02	10	sp|P41226|UBA7_HUMAN
169	18287	TVTTVILEV	TVTTVILEV/2	108.207	A02	9	sp|Q9UKF6|CPSF3_HUMAN
186	20002	LLGPRLVLA	LLGPRLVLA/2	107.538	A02	9	sp|P49755|TMEDA_HUMAN
96	10312	VLTSVTEAL	VLTSVTEAL/2	107.417	A02	9	sp|Q7Z401|MYCPP_HUMAN
9	962	SLWSLTHLTAL	SLWSLTHLTAL/2	106.889	A02	11	sp|Q96LI5|CNO6L_HUMAN
164	17511	AILTTLIHL	AILTTLIHL/2	106.774	A02	9	sp|Q9UI26|IPO11_HUMAN
120	12764	RLLQEQHQL	RLLQEQHQL/2	106.367	A02	9	sp|Q63HN8|RN213_HUMAN
185	19404	ALSNLEVKL	ALSNLEVKL/2	104.886	A02	9	sp|Q86UX7|URP2_HUMAN
87	9080	MIGLVLPSL	MIGLVLPSL/2	104.368	A02	9	reverse_sp|Q8WWB7|NCUG1_HUMAN
106	11028	FVLPVATQI	FVLPVATQI/2	104.038	A02	9	sp|Q99622|C10_HUMAN
6	621	RLMNETTAV	RLM[147]NETTAV/2	103.5	A02	9	sp|O95757|HS74L_HUMAN
209	21614	HLAIKLEQV	HLAIKLEQV/2	103.416	A02	9	sp|Q9Y4B6|VPRBP_HUMAN
153	15595	GLCPHVVVL	GLCPHVVVL/2	101.928	A02	9	sp|P11586|C1TC_HUMAN
85	8484	FALFIISL	FALFIISL/2	99.812	A02	8	reverse_sp|O14626|GP171_HUMAN
216	21064	ATIGELAQV	ATIGELAQV/2	97.519	A02	9	sp|P42345|MTOR_HUMAN
121	11494	VLLKARLVPA	VLLKARLVPA/3	94.992	A02	10	sp|Q6P995|F171B_HUMAN
211	20018	YCYDNIHFM	YCYDNIHFM[147]/2	94.872	A02	9	sp|Q9Y6E2|BZW2_HUMAN
77	7196	MVDGTLLLL	M[147]VDGTLLLL/2	93.455	A02	9	sp|P13747|HLAE_HUMAN
127	11854	RLWDLTTGTTT	RLWDLTTGTTT/2	93.339	A02	11	sp|P63244|GBLP_HUMAN
153	14035	ALSDLRCNL	ALSDLRCNL/2	91.732	A02	9	sp|P46379|BAG6_HUMAN
217	19366	ALCPQVINA	ALCPQVINA/2	89.244	A02	9	sp|P35221|CTNA1_HUMAN
221	19653	LIKEVDIYTV	LIKEVDIYTV/2	88.928	A02	10	sp|Q99873|ANM1_HUMAN
235	20787	AMPPPPPQGV	AM[147]PPPPPQGV/2	88.455	A02	10	sp|O60216|RAD21_HUMAN
213	18395	MLPPPPLTA	MLPPPPLTA/2	86.362	A02	9	sp|P18858|DNLI1_HUMAN
30	2587	LLSSVSLAL	LLSSVSLAL/2	86.233	A02	9	reverse_sp|Q86SQ4|GP126_HUMAN
232	19700	TLFTKELVL	TLFTKELVL/2	84.914	A02	9	sp|Q7KZF4|SND1_HUMAN
44	3697	SLLQTQHAL	SLLQTQHAL/2	84.023	A02	9	sp|P53365|ARFP2_HUMAN
162	13546	FVTLLPIEL	FVTLLPIEL/2	83.617	A02	9	reverse_sp|Q9H7T0|CTSRB_HUMAN
153	12576	KVLDLKINL	KVLDLKINL/2	82.196	A02	9	sp|Q96RL7|VP13A_HUMAN
246	20193	NLINQEIML	NLINQEIM[147]L/2	82.085	A02	9	sp|Q12923|PTN13_HUMAN
126	10296	KLQDNLRQL	KLQDNLRQL/2	81.714	A02	9	sp|Q96HR3|MED30_HUMAN
40	3254	YLAKVKSLL	YLAKVKSLL/2	81.35	A02	9	sp|P26358|DNMT1_HUMAN
34	2750	ALAKPPVVSV	ALAKPPVVSV/2	80.882	A02	10	sp|Q96L91|EP400_HUMAN
70	5640	KTIETSPSL	KTIETSPSL/2	80.571	A02	9	sp|Q9NVI1|FANCI_HUMAN
261	20522	KQYGNEVFL	KQYGNEVFL/2	78.628	A02	9	sp|P50990|TCPQ_HUMAN
30	2316	ALYASRLYL	ALYASRLYL/2	77.2	A02	9	sp|Q96IJ6|GMPPA_HUMAN
54	4129	ALAEIAKAEL	ALAEIAKAEL/2	76.463	A02	10	sp|P23246|SFPQ_HUMAN
4	301	YLADVTNAL	YLADVTNAL/2	75.25	A02	9	sp|Q5T4S7|UBR4_HUMAN
88	6545	LLYQGPHNTL	LLYQGPHNTL/2	74.375	A02	10	sp|P13612|ITA4_HUMAN
12	885	ALWWGTITL	ALWWGTITL/2	73.75	A02	9	sp|Q9NR82|KCNQ5_HUMAN
14	1025	SLASHIQSL	SLASHIQSL/2	73.214	A02	9	sp|Q6ZS81|WDFY4_HUMAN
232	16371	RLVQGSILKKV	RLVQGSILKKV/3	70.565	A02	11	sp|P12004|PCNA_HUMAN
277	19503	ALLKIEGVYA	ALLKIEGVYA/2	70.408	A02	10	sp|P18077|RL35A_HUMAN
262	18432	FLLGCGLSLATS	FLLGCGLSLATS/2	70.351	A02	12	sp|Q6UWB1|I27RA_HUMAN
16	1078	ALSEVTAAL	ALSEVTAAL/2	67.375	A02	9	sp|Q13586|STIM1_HUMAN
14	874	YLHSGQVAL	YLHSGQVAL/2	62.429	A02	9	sp|Q7Z3J2|CP062_HUMAN
41	2540	RLYPEGLAQL	RLYPEGLAQL/2	61.951	A02	10	sp|P61421|VA0D1_HUMAN
55	3383	AVFDKTLAEL	AVFDKTLAEL/2	61.509	A02	10	sp|Q6VMQ6|MCAF1_HUMAN
313	19027	GLVAGGIIGA	GLVAGGIIGA/2	60.789	A02	10	sp|Q9NPL8|TIDC1_HUMAN
210	12622	ALSQINTKL	ALSQINTKL/2	60.105	A02	9	sp|O95825|QORL1_HUMAN
35	2103	KVADLVLML	KVADLVLM[147]L/2	60.086	A02	9	sp|Q5VTM2|AGAP9_HUMAN
165	9774	KLSLVAAML	KLSLVAAM[147]L/2	59.236	A02	9	sp|P11021|GRP78_HUMAN
64	3617	RLLKSKLYL	RLLKSKLYL/3	56.516	A02	9	sp|P10620|MGST1_HUMAN
35	1968	RVLDPSMVILEV	RVLDPSM[147]VILEV/2	56.229	A02	12	sp|Q9UJX6|ANC2_HUMAN
94	5159	RLIAQRYLL	RLIAQRYLL/3	54.883	A02	9	sp|P25789|PSA4_HUMAN
334	18310	ALRGEIETV	ALRGEIETV/2	54.82	A02	9	sp|P42704|LPPRC_HUMAN
388	21199	ALVQDLAKA	ALVQDLAKA/2	54.637	A02	9	sp|P14635|CCNB1_HUMAN
183	9977	RLPPPFPGL	RLPPPFPGL/2	54.519	A02	9	sp|Q13596|SNX1_HUMAN
233	12509	ALVCAVGLGL	ALVCAVGLGL/2	53.687	A02	10	reverse_sp|P09564|CD7_HUMAN
37	1962	ALANIDLAL	ALANIDLAL/2	53.027	A02	9	sp|P46940|IQGA1_HUMAN
332	16820	LIDVITCAFL	LIDVITCAFL/2	50.663	A02	10	reverse_sp|Q9BZG8|DPH1_HUMAN
256	11078	SISGTVISLL	SISGTVISLL/2	43.273	A02	10	reverse_sp|Q9UGF7|O12D3_HUMAN
420	18081	VLERVNAV	VLERVNAV/2	43.05	A02	8	sp|Q9UL46|PSME2_HUMAN
246	10525	ALNEEAGRLLL	ALNEEAGRLLL/2	42.785	A02	11	sp|Q16763|UBE2S_HUMAN
41	1747	RVSDINFTL	RVSDINFTL/2	42.61	A02	9	sp|Q5H9R7|PP6R3_HUMAN
24	984	RLYSGISGLEL	RLYSGISGLEL/2	41	A02	11	sp|Q9H9Y6|RPA2_HUMAN
237	9403	GVLPNIQAV	GVLPNIQAV/2	39.675	A02	9	sp|Q96QV6|H2A1A_HUMAN
531	19600	LLPPPPCPA	LLPPPPCPA/2	36.911	A02	9	sp|Q9BTY2|FUCO2_HUMAN
637	22539	IQIMKVEEI	IQIMKVEEI/2	35.383	A02	9	sp|Q02543|RL18A_HUMAN
613	20869	NQFPGFKEV	NQFPGFKEV/2	34.044	A02	9	sp|P08579|RU2B_HUMAN
629	21295	KLPPPPPQA	KLPPPPPQA/2	33.855	A02	9	sp|O60341|KDM1A_HUMAN
150	5045	ALSKEGIVAL	ALSKEGIVAL/2	33.633	A02	10	sp|P40227|TCPZ_HUMAN
111	3680	VMAPRALL	VM[147]APRALL/2	33.153	A02	8	sp|P10321|1C07_HUMAN
80	2634	AVANIVNSV	AVANIVNSV/2	32.925	A02	9	sp|Q9BRQ8|AIFM2_HUMAN
354	11050	HLDATKLLL	HLDATKLLL/2	31.215	A02	9	sp|Q96AE7|TTC17_HUMAN
232	7236	ALRDVSEEL	ALRDVSEEL/2	31.19	A02	9	sp|P40222|TXLNA_HUMAN
196	6062	KVLDLRINL	KVLDLRINL/2	30.929	A02	9	sp|Q709C8|VP13C_HUMAN
507	15298	RVPPVPPNV	RVPPVPPNV/2	30.174	A02	9	sp|Q9Y483|MTF2_HUMAN
30	889	RLLPPGAVVAV	RLLPPGAVVAV/2	29.633	A02	11	sp|Q7Z7A3|CTU1_HUMAN
759	19498	LLDRFLAT	LLDRFLAT/2	25.689	A02	8	sp|Q14094|CCNI_HUMAN
457	10741	VAVGIIVAMPV	VAVGIIVAM[147]PV/3	23.503	A02	11	reverse_sp|Q8IZU9|KIRR3_HUMAN
1016	22654	ALCNIHENI	ALCNIHENI/2	22.297	A02	9	sp|P53621|COPA_HUMAN
553	12217	RLPGPLGTV	RLPGPLGTV/2	22.092	A02	9	sp|Q53GL7|PAR10_HUMAN
1049	21496	ALGTDAEGQKV	ALGTDAEGQKV/2	20.492	A02	11	sp|O00186|STXB3_HUMAN
16	316	RLYDPASGTISL	RLYDPASGTISL/2	19.75	A02	12	sp|Q9NRK6|ABCBA_HUMAN
1232	23157	ICAGHVPGV	ICAGHVPGV/2	18.796	A02	9	sp|Q9NSP4|CENPM_HUMAN
1240	22287	ALLSSLARC	ALLSSLARC/2	17.973	A02	9	sp|Q9UNW1|MINP1_HUMAN
83	1436	FIWKSGGDLTL	FIWKSGGDLTL/2	17.301	A02	11	sp|Q8TAF3|WDR48_HUMAN
1050	17646	LLEVPVML	LLEVPVM[147]L/2	16.806	A02	8	sp|Q96AB3|ISOC2_HUMAN
1352	22044	AQYEHDLEVA	AQYEHDLEVA/2	16.305	A02	10	sp|P62826|RAN_HUMAN
29	457	RLSPVSPAL	RLSPVSPAL/2	15.759	A02	9	sp|O60294|TYW4_HUMAN
994	15490	LIDDKGTIKL	LIDDKGTIKL/2	15.584	A02	10	sp|P06493|CDK1_HUMAN
222	3316	AAAPVVPAV	AAAPVVPAV/2	14.937	A02	9	sp|O95271|TNKS1_HUMAN
1440	19115	MFVYIVFL	MFVYIVFL/2	13.274	A02	8	sp|Q8NER1|TRPV1_HUMAN
1270	16216	KVFGNEIKL	KVFGNEIKL/2	12.769	A02	9	sp|P19338|NUCL_HUMAN
198	2480	YAYDGKDYIAL	YAYDGKDYIAL/2	12.525	A02	11	sp|P01892|1A02_HUMAN
1721	21490	VLYEKDIQLF	VLYEKDIQLF/2	12.487	A02	10	sp|Q9H8T0|AKTIP_HUMAN
1375	16682	YVVVEAEEEL	YVVVEAEEEL/2	12.132	A02	10	sp|Q07075|AMPE_HUMAN
1076	12471	PLMLPPPLEL	PLM[147]LPPPLEL/2	11.59	A02	10	sp|A6NNC1|P12LL_HUMAN
482	5198	SVIGFRILL	SVIGFRILL/2	10.784	A02	9	sp|P01848|TCA_HUMAN
1854	18941	NVIERLQEA	NVIERLQEA/2	10.216	A02	9	sp|Q9UBK9|UXT_HUMAN
2125	19045	RQPDSGISSI	RQPDSGISSI/2	8.962	A02	10	sp|P04843|RPN1_HUMAN
1313	11540	GVAPSRAIYFA	GVAPSRAIYFA/2	8.789	A02	11	sp|Q96CQ1|S2536_HUMAN
19	166	FLMQYPGRSL	FLM[147]QYPGRSL/2	8.737	A02	10	sp|Q9GZR7|DDX24_HUMAN
1553	13397	KVVLTQANKLGV	KVVLTQANKLGV/2	8.627	A02	12	sp|O94979|SC31A_HUMAN
2682	21540	KLWDFQGFE	KLWDFQGFE/2	8.031	A02	9	sp|P43034|LIS1_HUMAN
1675	13297	RLSEFIPAVF	RLSEFIPAVF/2	7.939	A02	10	sp|Q12768|STRUM_HUMAN
83	632	SVAEGRALMSV	SVAEGRALM[147]SV/2	7.614	A02	11	sp|Q9UJV9|DDX41_HUMAN
2253	15204	NIRDFLVEI	NIRDFLVEI/2	6.748	A02	9	sp|Q96JI7|SPTCS_HUMAN
3874	22208	LAVYIDRV	LAVYIDRV/2	5.733	A02	8	sp|P02545|LMNA_HUMAN
3354	18429	YGLPVVVKL	YGLPVVVKL/2	5.495	A02	9	sp|P35222|CTNB1_HUMAN
3252	17589	TIAEVGKWLQA	TIAEVGKWLQA/2	5.409	A02	11	sp|P35573|GDE_HUMAN
4552	22524	LAVYIDKV	LAVYIDKV/2	4.948	A02	8	sp|P20700|LMNB1_HUMAN
1276	6298	VVIRGNSIIML	VVIRGNSIIM[147]L/2	4.936	A02	11	sp|P62308|RUXG_HUMAN
4531	21435	FLPPPFPPP	FLPPPFPPP/2	4.731	A02	9	sp|Q01844|EWS_HUMAN
4099	18815	ALAGHLQTC	ALAGHLQTC/2	4.59	A02	9	sp|O95271|TNKS1_HUMAN
4698	21562	VQSMDVAAFNKI	VQSM[147]DVAAFNKI/2	4.59	A02	12	sp|P24534|EF1B_HUMAN
1333	6114	TTLHRLLAL	TTLHRLLAL/2	4.587	A02	9	sp|Q96M86|DNHD1_HUMAN
4613	21072	IALNEDLRSWTA	IALNEDLRSWTA/2	4.568	A02	12	sp|P13746|1A11_HUMAN
5396	23912	VLINLLKEC	VLINLLKEC/2	4.431	A02	9	sp|Q9NRP2|COXM2_HUMAN
4225	18505	FLILPGYIDF	FLILPGYIDF/2	4.38	A02	10	sp|P12268|IMDH2_HUMAN
226	927	KVAPAPAVV	KVAPAPAVV/2	4.102	A02	9	sp|P62424|RL7A_HUMAN
4194	17038	MSVTFSMIL	M[147]SVTFSM[147]IL/2	4.062	A02	9	reverse_sp|Q8N699|MYCT1_HUMAN
6077	23333	KLPSETIFVG	KLPSETIFVG/2	3.84	A02	10	sp|P57678|GEMI4_HUMAN
5630	20295	GLVPFLVS	GLVPFLVS/2	3.605	A02	8	sp|P52292|IMA1_HUMAN
6054	21664	YELPENIRV	YELPENIRV/2	3.578	A02	9	sp|Q9NZ63|CI078_HUMAN
4493	15780	FIVPLTDLRIPS	FIVPLTDLRIPS/2	3.512	A02	12	sp|P04114|APOB_HUMAN
5850	19761	GSISRIYL	GSISRIYL/2	3.378	A02	8	sp|O75821|EIF3G_HUMAN
7369	24065	LSLENLEKI	LSLENLEKI/2	3.266	A02	9	sp|Q9Y2H2|SAC2_HUMAN
7100	22350	VLDELKNMKC	VLDELKNM[147]KC/3	3.148	A02	10	sp|Q7L576|CYFP1_HUMAN
28179	6	RPRPGTGLGRVM	RPRPGTGLGRVM/3	4696.5	B07	12	sp|Q9BVK6|TMED9_HUMAN
30689	7	SPRPPLGSSL	SPRPPLGSSL/2	4384.14	B07	10	sp|Q8NHM5|KDM2B_HUMAN
30150	7	TPRPTGTPL	TPRPTGTPL/2	4307.14	B07	9	sp|Q7Z7G0|TARSH_HUMAN
29484	7	APRPPPKPM	APRPPPKPM[147]/2	4212	B07	9	sp|P62854|RS26_HUMAN;sp|Q5JNZ5|RS26L_HUMAN
29276	7	SPRKPSHPVM	SPRKPSHPVM[147]/3	4182.29	B07	10	sp|Q8NA72|POC5_HUMAN
29275	7	SPRLSSSL	SPRLSSSL/2	4182.14	B07	8	sp|O14974|MYPT1_HUMAN
29050	7	SPRQLFSAL	SPRQLFSAL/2	4150	B07	9	sp|Q9NTJ4|MA2C1_HUMAN
24784	6	HPMKPHRLAL	HPM[147]KPHRLAL/3	4130.67	B07	10	sp|O15379|HDAC3_HUMAN
28822	7	APRHPSTNSL	APRHPSTNSL/2	4117.43	B07	10	sp|Q9P032|NDUF4_HUMAN
28538	7	APRFGGSRAGPL	APRFGGSRAGPL/3	4076.86	B07	12	sp|P17844|DDX5_HUMAN
28408	7	APRPDSRHHSL	APRPDSRHHSL/3	4058.29	B07	11	sp|Q9BSV6|SEN34_HUMAN
28256	7	SPRWGGIM	SPRWGGIM[147]/2	4036.57	B07	8	sp|Q96S52|PIGS_HUMAN
28132	7	TPRPMTAEL	TPRPM[147]TAEL/2	4018.86	B07	9	sp|P78357|CNTP1_HUMAN
27949	7	SPRLMSNAL	SPRLM[147]SNAL/2	3992.71	B07	9	sp|Q9NZJ7|MTCH1_HUMAN
27773	7	YPRTGGTL	YPRTGGTL/2	3967.57	B07	8	sp|Q8TEH3|DEN1A_HUMAN
31669	8	SPRGPGQGSGHL	SPRGPGQGSGHL/2	3958.62	B07	12	sp|Q15027|ACAP1_HUMAN
31423	8	SPRQPSGGQI	SPRQPSGGQI/2	3927.88	B07	10	sp|O14497|ARI1A_HUMAN
31020	8	SPRGPGCSL	SPRGPGCSL/2	3877.5	B07	9	sp|Q9NQT4|EXOS5_HUMAN
27124	7	APRWGNPRAL	APRWGNPRAL/3	3874.86	B07	10	sp|P00973|OAS1_HUMAN
26972	7	APRKGSFSAL	APRKGSFSAL/2	3853.14	B07	10	sp|Q13619|CUL4A_HUMAN
30573	8	VPRPPQTSL	VPRPPQTSL/2	3821.62	B07	9	sp|O95785|WIZ_HUMAN
30395	8	SPRVPNSSV	SPRVPNSSV/2	3799.38	B07	9	sp|Q9NR09|BIRC6_HUMAN
30151	8	SPRLPVGGFRSL	SPRLPVGGFRSL/3	3768.88	B07	12	sp|Q14669|TRIPC_HUMAN
26322	7	IPRTPLSPSPM	IPRTPLSPSPM[147]/2	3760.29	B07	11	sp|Q69YQ0|CYTSA_HUMAN
30010	8	RPRNPAGRTGL	RPRNPAGRTGL/3	3751.25	B07	11	sp|Q9BW91|NUDT9_HUMAN
29931	8	SPREAARVL	SPREAARVL/2	3741.38	B07	9	sp|Q2T9J0|TYSD1_HUMAN
29928	8	SPEETRAAL	SPEETRAAL/2	3741	B07	9	sp|P78549|NTH_HUMAN
29733	8	VPRKPVKHTAM	VPRKPVKHTAM[147]/3	3716.62	B07	11	sp|P21333|FLNA_HUMAN
29713	8	VPRVPTHTL	VPRVPTHTL/2	3714.12	B07	9	sp|Q8IWZ3|ANKH1_HUMAN
29684	8	SPRKLPTSL	SPRKLPTSL/2	3710.5	B07	9	sp|Q9UIG0|BAZ1B_HUMAN
25833	7	MPRTGNGPM	M[147]PRTGNGPM[147]/2	3690.43	B07	9	sp|O95793|STAU1_HUMAN
29390	8	SPRGSTDSL	SPRGSTDSL/2	3673.75	B07	9	sp|Q9UQQ2|SH2B3_HUMAN
29325	8	SPRKPVAKWHSL	SPRKPVAKWHSL/3	3665.62	B07	12	sp|Q9BT88|SYT11_HUMAN
32980	9	EPRPPHGEL	EPRPPHGEL/2	3664.44	B07	9	sp|P04818|TYSY_HUMAN
29308	8	RPRPSGEEVL	RPRPSGEEVL/2	3663.5	B07	10	sp|P33992|MCM5_HUMAN
29261	8	KPRKPAGAA	KPRKPAGAA/2	3657.62	B07	9	sp|P16402|H13_HUMAN
29254	8	LPRIQSTAL	LPRIQSTAL/2	3656.75	B07	9	sp|Q13085|ACACA_HUMAN
25585	7	RPYQPLGAL	RPYQPLGAL/2	3655	B07	9	sp|Q9Y5Y2|NUBP2_HUMAN
29185	8	HPRSPTPTL	HPRSPTPTL/2	3648.12	B07	9	sp|Q96HE9|PRR11_HUMAN
29182	8	APRPAGSYL	APRPAGSYL/2	3647.75	B07	9	sp|P33076|C2TA_HUMAN
28992	8	RPRPTEATV	RPRPTEATV/2	3624	B07	9	sp|Q92619|HMHA1_HUMAN
28864	8	SPRSPSTTYL	SPRSPSTTYL/2	3608	B07	10	sp|Q13111|CAF1A_HUMAN
28839	8	SPRSSLNNSL	SPRSSLNNSL/2	3604.88	B07	10	sp|Q9UPW0|FOXJ3_HUMAN
28745	8	HPHSGSGRSVL	HPHSGSGRSVL/3	3593.12	B07	11	sp|Q12772|SRBP2_HUMAN
28682	8	SPEGRYSAL	SPEGRYSAL/2	3585.25	B07	9	sp|Q96RV3|PCX1_HUMAN
28524	8	APRPPVSAA	APRPPVSAA/2	3565.5	B07	9	sp|Q8TF74|WIPF2_HUMAN
28523	8	SPRGAGYTF	SPRGAGYTF/2	3565.38	B07	9	sp|P67775|PP2AA_HUMAN
24856	7	SPAPRTAL	SPAPRTAL/2	3550.86	B07	8	sp|Q96RJ3|TR13C_HUMAN
28390	8	SPRVVSTSL	SPRVVSTSL/2	3548.75	B07	9	sp|Q9Y6D5|BIG2_HUMAN
28387	8	SPGSPRPAL	SPGSPRPAL/2	3548.38	B07	9	sp|Q9H211|CDT1_HUMAN
28349	8	SPRSSTVHIL	SPRSSTVHIL/3	3543.62	B07	10	sp|Q9UNY4|TTF2_HUMAN
24782	7	KPQPHSGSVL	KPQPHSGSVL/2	3540.29	B07	10	sp|Q9H6W3|NO66_HUMAN
28286	8	RPRPDEERPL	RPRPDEERPL/2	3535.75	B07	10	sp|Q86YV0|RASL3_HUMAN
28231	8	HPRSPNVLSVAL	HPRSPNVLSVAL/2	3528.88	B07	12	sp|Q16665|HIF1A_HUMAN
28205	8	NPRKHITSL	NPRKHITSL/2	3525.62	B07	9	sp|Q6P1K8|T2H2L_HUMAN
24642	7	APLQHRHVL	APLQHRHVL/2	3520.29	B07	9	sp|Q504T8|MIDN_HUMAN
28129	8	SPNQARAQAAL	SPNQARAQAAL/2	3516.12	B07	11	sp|P26599|PTBP1_HUMAN
31639	9	SPEQSRNVL	SPEQSRNVL/2	3515.44	B07	9	sp|Q96JM3|CHAP1_HUMAN
27925	8	VPRSSSMVL	VPRSSSM[147]VL/2	3490.62	B07	9	sp|Q9H992|MARH7_HUMAN
27848	8	SPRIYSNSL	SPRIYSNSL/2	3481	B07	9	sp|Q9Y2U8|MAN1_HUMAN
27842	8	RPRGLRPLEL	RPRGLRPLEL/3	3480.25	B07	10	sp|Q9BUA3|CK084_HUMAN
27729	8	RPRGGGAGGSSV	RPRGGGAGGSSV/2	3466.12	B07	12	sp|Q06587|RING1_HUMAN
27691	8	NPRDPSSSSSM	NPRDPSSSSSM[147]/2	3461.38	B07	11	sp|Q9Y6N7|ROBO1_HUMAN
27601	8	APRGTWSTGL	APRGTWSTGL/2	3450.12	B07	10	sp|O60828|PQBP1_HUMAN
27588	8	SPSSPGSSL	SPSSPGSSL/2	3448.5	B07	9	sp|O95271|TNKS1_HUMAN
30903	9	SPRISPATTL	SPRISPATTL/2	3433.67	B07	10	sp|Q8IVW6|ARI3B_HUMAN
27467	8	APRPYASSL	APRPYASSL/2	3433.38	B07	9	sp|Q96EP0|RNF31_HUMAN
27249	8	GPRGSGPPM	GPRGSGPPM[147]/2	3406.12	B07	9	sp|P48634|PRC2A_HUMAN
27064	8	RPHLAGTHTSL	RPHLAGTHTSL/3	3383	B07	11	sp|Q8IYD8|FANCM_HUMAN
27054	8	APRTNGVAM	APRTNGVAM[147]/2	3381.75	B07	9	sp|Q92567|F168A_HUMAN
26995	8	TPSPARPAL	TPSPARPAL/2	3374.38	B07	9	sp|Q9H211|CDT1_HUMAN
26949	8	APRTVALTAL	APRTVALTAL/2	3368.62	B07	10	sp|P04440|DPB1_HUMAN
26946	8	MPRGPTLGHVSL	M[147]PRGPTLGHVSL/3	3368.25	B07	12	sp|Q96TA2|YMEL1_HUMAN
26918	8	LPRPPMLLAL	LPRPPM[147]LLAL/2	3364.75	B07	10	sp|P07686|HEXB_HUMAN
26865	8	RPKSTSTSSM	RPKSTSTSSM/2	3358.12	B07	10	sp|P27816|MAP4_HUMAN
30135	9	APRPSTGPH	APRPSTGPH/2	3348.33	B07	9	sp|P62701|RS4X_HUMAN
30098	9	SPRKPIDSL	SPRKPIDSL/2	3344.22	B07	9	sp|Q9UQ35|SRRM2_HUMAN
26564	8	YPRSGTGQTI	YPRSGTGQTI/2	3320.5	B07	10	sp|Q8TBM8|DJB14_HUMAN
23161	7	SPLRSSSAL	SPLRSSSAL/2	3308.71	B07	9	sp|P59923|ZN445_HUMAN
26390	8	RPSGPSKAL	RPSGPSKAL/2	3298.75	B07	9	sp|P48444|COPD_HUMAN
29679	9	VPESHRKPL	VPESHRKPL/2	3297.67	B07	9	sp|Q01850|CDR2_HUMAN
26378	8	APRTFSNSL	APRTFSNSL/2	3297.25	B07	9	sp|Q99551|MTERF_HUMAN
29552	9	APRQPGLM	APRQPGLM[147]/2	3283.56	B07	8	sp|Q9Y6H1|CHCH2_HUMAN
22969	7	SPGWVRLAL	SPGWVRLAL/2	3281.29	B07	9	sp|Q9BQB6|VKOR1_HUMAN
19639	6	RPYPSSSPM	RPYPSSSPM[147]/2	3273.17	B07	9	sp|O75143|ATG13_HUMAN
29388	9	APRQPGLMAQM	APRQPGLM[147]AQM[147]/2	3265.33	B07	11	sp|Q9Y6H1|CHCH2_HUMAN
26102	8	SPAIGRTSIL	SPAIGRTSIL/2	3262.75	B07	10	sp|Q9C0D2|K1731_HUMAN
29347	9	NPRVKAAAL	NPRVKAAAL/2	3260.78	B07	9	sp|O15269|SPTC1_HUMAN
29310	9	KPRSPPRALVL	KPRSPPRALVL/3	3256.67	B07	11	sp|Q86TG7|PEG10_HUMAN
26013	8	IPRGVNVSAL	IPRGVNVSAL/2	3251.62	B07	10	sp|P38606|VATA_HUMAN
29207	9	KPEEQRQAL	KPEEQRQAL/2	3245.22	B07	9	sp|Q15149|PLEC_HUMAN
29147	9	VPRTAENFRAL	VPRTAENFRAL/3	3238.56	B07	11	sp|P49792|RBP2_HUMAN
29121	9	KPRVPPATAF	KPRVPPATAF/2	3235.67	B07	10	sp|Q99707|METH_HUMAN
22484	7	RPAPPLRPSAAL	RPAPPLRPSAAL/3	3212	B07	12	sp|Q15052|ARHG6_HUMAN
25644	8	RPKEGTSTL	RPKEGTSTL/2	3205.5	B07	9	sp|Q9Y5W9|SNX11_HUMAN
28794	9	APRKKSPDL	APRKKSPDL/2	3199.33	B07	9	sp|Q9BT25|HAUS8_HUMAN
25528	8	SPAPTHNSL	SPAPTHNSL/2	3191	B07	9	sp|P49327|FAS_HUMAN
25446	8	SPMMPRITSVF	SPM[147]M[147]PRITSVF/2	3180.75	B07	11	sp|Q6AHZ1|Z518A_HUMAN
28570	9	TPRGGVGSVAL	TPRGGVGSVAL/2	3174.44	B07	11	sp|Q9P2G9|KLHL8_HUMAN
25356	8	RPRHQGVMVGM	RPRHQGVM[147]VGM[147]/3	3169.5	B07	11	sp|P62736|ACTA_HUMAN
28523	9	APRAGEQGEAM	APRAGEQGEAM/2	3169.22	B07	11	sp|Q5JSZ5|PRC2B_HUMAN
28341	9	APRHGLQSL	APRHGLQSL/2	3149	B07	9	sp|P48634|PRC2A_HUMAN
28304	9	HPKGGSTSAL	HPKGGSTSAL/2	3144.89	B07	10	sp|Q9NQG7|HPS4_HUMAN
28250	9	FPRSPGQPSSL	FPRSPGQPSSL/2	3138.89	B07	11	sp|Q5T011|SZT2_HUMAN
28196	9	VPRPTSTVGL	VPRPTSTVGL/2	3132.89	B07	10	sp|Q9BSJ1|TRI51_HUMAN
28180	9	SPQSPGDAL	SPQSPGDAL/2	3131.11	B07	9	sp|Q96KR1|ZFR_HUMAN
28174	9	APREALAQTVL	APREALAQTVL/2	3130.44	B07	11	sp|Q99829|CPNE1_HUMAN
28083	9	APKPGGLSL	APKPGGLSL/2	3120.33	B07	9	sp|Q8NCH0|CHSTE_HUMAN
28082	9	VPRPVLRALSF	VPRPVLRALSF/3	3120.22	B07	11	sp|Q9GZR7|DDX24_HUMAN
28052	9	SPQKTMSVL	SPQKTM[147]SVL/2	3116.89	B07	9	sp|Q12888|TP53B_HUMAN
24913	8	APAKAQSAL	APAKAQSAL/2	3114.12	B07	9	sp|Q5VWN6|F208B_HUMAN
27948	9	VPNQKRLTL	VPNQKRLTL/2	3105.33	B07	9	sp|O60488|ACSL4_HUMAN
27800	9	VPRPPSLLATL	VPRPPSLLATL/2	3088.89	B07	11	sp|Q14689|DIP2A_HUMAN
27702	9	APAPSKGQTL	APAPSKGQTL/2	3078	B07	10	sp|Q6ZRI6|CO039_HUMAN
30735	10	LPRQPPMSL	LPRQPPM[147]SL/2	3073.5	B07	9	sp|Q13045|FLII_HUMAN
24440	8	SPRWGGIMV	SPRWGGIMV/2	3055	B07	9	sp|Q96S52|PIGS_HUMAN
24379	8	GPAERSGAL	GPAERSGAL/2	3047.38	B07	9	sp|O96018|APBA3_HUMAN
30459	10	TPRPPGPGL	TPRPPGPGL/2	3045.9	B07	9	sp|Q8NEZ4|KMT2C_HUMAN
30374	10	APRVPVQAL	APRVPVQAL/2	3037.4	B07	9	sp|O75179|ANR17_HUMAN
27294	9	SPRAPFYRPL	SPRAPFYRPL/3	3032.67	B07	10	sp|A6NED2|RCCD1_HUMAN
24257	8	LPSWGRAEL	LPSWGRAEL/2	3032.12	B07	9	sp|Q96EP0|RNF31_HUMAN
27285	9	RPENYREAL	RPENYREAL/3	3031.67	B07	9	sp|P06276|CHLE_HUMAN
27162	9	RPRAGASISTL	RPRAGASISTL/3	3018	B07	11	sp|Q9UJW0|DCTN4_HUMAN
27160	9	APRPVDEPAM	APRPVDEPAM[147]/2	3017.78	B07	10	sp|Q9Y2X0|MED16_HUMAN
27007	9	RPRGLALVL	RPRGLALVL/2	3000.78	B07	9	sp|P42575|CASP2_HUMAN
30005	10	MPRQPSATRL	M[147]PRQPSATRL/3	3000.5	B07	10	sp|Q6P582|MZT2A_HUMAN
23982	8	SPSSVTGNAL	SPSSVTGNAL/2	2997.75	B07	10	sp|Q9NYB0|TE2IP_HUMAN
29750	10	SPRLPVGGF	SPRLPVGGF/2	2975	B07	9	sp|Q14669|TRIPC_HUMAN
26686	9	SPVVKGNAL	SPVVKGNAL/2	2965.11	B07	9	sp|Q5VW36|FOCAD_HUMAN
29473	10	APTKRKSL	APTKRKSL/2	2947.3	B07	8	sp|P46013|KI67_HUMAN
29416	10	SPRLSQTFL	SPRLSQTFL/2	2941.6	B07	9	sp|Q92608|DOCK2_HUMAN
23507	8	SPMADRSMM	SPM[147]ADRSM[147]M[147]/2	2938.38	B07	9	sp|P18583|SON_HUMAN
26432	9	SPTSVRQMAL	SPTSVRQM[147]AL/2	2936.89	B07	10	sp|Q96NB2|SFXN2_HUMAN
26282	9	SPNGHRPQL	SPNGHRPQL/2	2920.22	B07	9	sp|Q5SRD0|FA21D_HUMAN
26263	9	LPRGFGSLPAL	LPRGFGSLPAL/2	2918.11	B07	11	sp|Q15404|RSU1_HUMAN
23196	8	FPRFGGSLAL	FPRFGGSLAL/2	2899.5	B07	10	sp|Q86YC3|NRROS_HUMAN
23186	8	SPLSAARAAL	SPLSAARAAL/2	2898.25	B07	10	sp|Q8N5I4|DHRSX_HUMAN
28904	10	RPRKDPLRHL	RPRKDPLRHL/3	2890.4	B07	10	sp|Q9BQ52|RNZ2_HUMAN
26010	9	RPTPKNSL	RPTPKNSL/2	2890	B07	8	sp|O95168|NDUB4_HUMAN
25722	9	MPRKITEVL	MPRKITEVL/3	2858	B07	9	sp|Q9BX10|GTPB2_HUMAN
25721	9	RPRAATVV	RPRAATVV/2	2857.89	B07	8	sp|P10644|KAP0_HUMAN
28576	10	SPEDRGSSL	SPEDRGSSL/2	2857.6	B07	9	sp|Q76I76|SSH2_HUMAN
22833	8	RPSTPHTITL	RPSTPHTITL/3	2854.12	B07	10	sp|Q12770|SCAP_HUMAN
25628	9	RPKENSMSTL	RPKENSMSTL/2	2847.56	B07	10	sp|Q9H992|MARH7_HUMAN
28427	10	SPELRSTAM	SPELRSTAM[147]/2	2842.7	B07	9	sp|P42345|MTOR_HUMAN
28245	10	HPRTSITVVL	HPRTSITVVL/2	2824.5	B07	10	sp|Q9NQT4|EXOS5_HUMAN
22590	8	YPRLGGFVM	YPRLGGFVM[147]/2	2823.75	B07	9	sp|Q92797|SYMPK_HUMAN
25331	9	RPHSVIGGSL	RPHSVIGGSL/2	2814.56	B07	10	sp|Q00537|CDK17_HUMAN
22495	8	GPASHSRAL	GPASHSRAL/2	2811.88	B07	9	sp|Q14699|RFTN1_HUMAN
22495	8	VPASKRPPL	VPASKRPPL/2	2811.88	B07	9	sp|O60682|MUSC_HUMAN
22478	8	KPYQGVGSSSM	KPYQGVGSSSM[147]/2	2809.75	B07	11	sp|Q12907|LMAN2_HUMAN
22471	8	TPAPPTHAL	TPAPPTHAL/2	2808.88	B07	9	sp|Q5SXM2|SNPC4_HUMAN
25271	9	SPMAERSMM	SPM[147]AERSM[147]M[147]/2	2807.89	B07	9	sp|P18583|SON_HUMAN
22425	8	YPAERKQAL	YPAERKQAL/2	2803.12	B07	9	sp|O43592|XPOT_HUMAN
27992	10	RPKKSGDMTL	RPKKSGDM[147]TL/2	2799.2	B07	10	sp|Q8NFC6|BD1L1_HUMAN
25158	9	APSRNGMVL	APSRNGMVL/2	2795.33	B07	9	sp|P26373|RL13_HUMAN
30748	11	APRLETKSL	APRLETKSL/2	2795.27	B07	9	sp|Q6P6C2|ALKB5_HUMAN
25096	9	KPTGARPSAL	KPTGARPSAL/2	2788.44	B07	10	sp|O15213|WDR46_HUMAN
25086	9	RPANHRQLTF	RPANHRQLTF/2	2787.33	B07	10	sp|Q9UNM6|PSD13_HUMAN
25075	9	RPRKAFLL	RPRKAFLL/2	2786.11	B07	8	sp|P13667|PDIA4_HUMAN
27766	10	SPRDPVLTL	SPRDPVLTL/2	2776.6	B07	9	sp|Q86XL3|ANKL2_HUMAN
27748	10	LPNQARAQAAL	LPNQARAQAAL/2	2774.8	B07	11	sp|O95758|PTBP3_HUMAN
30423	11	SPQQNRQML	SPQQNRQM[147]L/2	2765.73	B07	9	sp|Q9UPN3|MACF1_HUMAN
30352	11	TPRPTAAEL	TPRPTAAEL/2	2759.27	B07	9	sp|Q9BSJ8|ESYT1_HUMAN
24788	9	SPAFSTRVL	SPAFSTRVL/2	2754.22	B07	9	sp|Q7KZF4|SND1_HUMAN
27345	10	KPRSPVVEL	KPRSPVVEL/2	2734.5	B07	9	sp|P25098|ARBK1_HUMAN
27323	10	RPKPPSATSI	RPKPPSATSI/2	2732.3	B07	10	sp|Q9UMS4|PRP19_HUMAN
30046	11	RPRPGQATSH	RPRPGQATSH/2	2731.45	B07	10	sp|Q8TE02|ELP5_HUMAN
27295	10	RPREAEVRFL	RPREAEVRFL/3	2729.5	B07	10	sp|Q13438|OS9_HUMAN
24549	9	APAPRPSL	APAPRPSL/2	2727.67	B07	8	sp|Q92620|PRP16_HUMAN
29996	11	VPRSQGTEAEL	VPRSQGTEAEL/2	2726.91	B07	11	sp|Q8NAG6|ANKL1_HUMAN
24529	9	SPFRSGTPM	SPFRSGTPM[147]/2	2725.44	B07	9	sp|Q96FX7|TRM61_HUMAN
27053	10	KPSVKGRAQL	KPSVKGRAQL/3	2705.3	B07	10	sp|P40227|TCPZ_HUMAN
29742	11	RPRNLGELCQRL	RPRNLGELCQRL/3	2703.82	B07	12	sp|Q9UI14|PRAF1_HUMAN
27012	10	RPHVSPRHSF	RPHVSPRHSF/3	2701.2	B07	10	sp|Q01201|RELB_HUMAN
29625	11	NPRQPLPASGL	NPRQPLPASGL/2	2693.18	B07	11	sp|Q96L08|SUSD3_HUMAN
26738	10	APRELGLGL	APRELGLGL/2	2673.8	B07	9	sp|Q9BTD8|RBM42_HUMAN
24060	9	RPVAPSGTAL	RPVAPSGTAL/2	2673.33	B07	10	sp|P35658|NU214_HUMAN
29391	11	NPRSPPATM	NPRSPPATM[147]/2	2671.91	B07	9	sp|Q6ZMC9|SIG15_HUMAN
29389	11	SPSKPAKSL	SPSKPAKSL/2	2671.73	B07	9	sp|P86790|CCZ1B_HUMAN
24005	9	RPAQVSQPF	RPAQVSQPF/2	2667.22	B07	9	sp|Q9Y520|PRC2C_HUMAN
23978	9	GPLPPHLAL	GPLPPHLAL/2	2664.22	B07	9	sp|Q08211|DHX9_HUMAN
26569	10	APSPSSSRSSF	APSPSSSRSSF/2	2656.9	B07	11	sp|Q6PCB5|RSBNL_HUMAN
23907	9	RPRKAFLLLL	RPRKAFLLLL/2	2656.33	B07	10	sp|P13667|PDIA4_HUMAN
26556	10	RPAPPAQSL	RPAPPAQSL/2	2655.6	B07	9	sp|O95208|EPN2_HUMAN
23857	9	RPAVGHSGL	RPAVGHSGL/2	2650.78	B07	9	sp|Q8IXZ2|ZC3H3_HUMAN
23849	9	RPAPPPEAL	RPAPPPEAL/2	2649.89	B07	9	sp|Q9NQG6|MID51_HUMAN
23832	9	LPSWGRAELAL	LPSWGRAELAL/2	2648	B07	11	sp|Q96EP0|RNF31_HUMAN
26457	10	RPRHQGVMV	RPRHQGVMV/2	2645.7	B07	9	sp|P62736|ACTA_HUMAN
23801	9	APAKKSTSL	APAKKSTSL/2	2644.56	B07	9	sp|O43815|STRN_HUMAN
23791	9	RPRDVSSVEL	RPRDVSSVEL/3	2643.44	B07	10	sp|P11277|SPTB1_HUMAN
26430	10	GPAPKGSSL	GPAPKGSSL/2	2643	B07	9	sp|P35408|PE2R4_HUMAN
26382	10	SPASPKISL	SPASPKISL/2	2638.2	B07	9	sp|Q8WWM7|ATX2L_HUMAN
29013	11	HPSQTVRKAL	HPSQTVRKAL/3	2637.55	B07	10	sp|Q32MZ4|LRRF1_HUMAN
21096	8	SPLNSSSAL	SPLNSSSAL/2	2637	B07	9	sp|Q9BVP2|GNL3_HUMAN
28902	11	APRAPPGPAGL	APRAPPGPAGL/2	2627.45	B07	11	sp|Q9NRL3|STRN4_HUMAN
28880	11	APRIPVTL	APRIPVTL/2	2625.45	B07	8	sp|O95372|LYPA2_HUMAN
23623	9	RPNNAYTAM	RPNNAYTAM[147]/2	2624.78	B07	9	sp|Q9Y5A9|YTHD2_HUMAN
23531	9	FPEPSRPPL	FPEPSRPPL/2	2614.56	B07	9	sp|Q2V2M9|FHOD3_HUMAN
20879	8	RPSPWRPLVL	RPSPWRPLVL/3	2609.88	B07	10	sp|Q9Y4P1|ATG4B_HUMAN
28682	11	APRLPITGL	APRLPITGL/2	2607.45	B07	9	sp|Q8TF50|ZN526_HUMAN
23423	9	TPMHPPSSL	TPM[147]HPPSSL/2	2602.56	B07	9	sp|P23771|GATA3_HUMAN
28616	11	APREGQGSSA	APREGQGSSA/2	2601.45	B07	10	sp|Q16566|KCC4_HUMAN
26001	10	LPAWPHRGL	LPAWPHRGL/2	2600.1	B07	9	sp|Q96P11|NSUN5_HUMAN
28579	11	GPRPITQSEL	GPRPITQSEL/2	2598.09	B07	10	sp|Q96S82|UBL7_HUMAN
28579	11	APRTLLQVL	APRTLLQVL/2	2598.09	B07	9	sp|Q5TEJ8|THMS2_HUMAN
23377	9	SPSDPSSSL	SPSDPSSSL/2	2597.44	B07	9	sp|Q9BZ67|FRMD8_HUMAN
23325	9	KPVSLGQAL	KPVSLGQAL/2	2591.67	B07	9	sp|O60341|KDM1A_HUMAN
28444	11	VPRVLGSSV	VPRVLGSSV/2	2585.82	B07	9	sp|Q07021|C1QBP_HUMAN
25780	10	KPVKPHSSF	KPVKPHSSF/2	2578	B07	9	sp|Q9Y520|PRC2C_HUMAN
25772	10	RPKLSSPAL	RPKLSSPAL/2	2577.2	B07	9	sp|Q09472|EP300_HUMAN
28325	11	SPRSSTVHI	SPRSSTVHI/2	2575	B07	9	sp|Q9UNY4|TTF2_HUMAN
28256	11	APRIITGPAPVL	APRIITGPAPVL/2	2568.73	B07	12	sp|Q96PU8|QKI_HUMAN
28232	11	RPKGGSGDTL	RPKGGSGDTL/2	2566.55	B07	10	sp|Q96F44|TRI11_HUMAN
25605	10	RPKSGGSGHAV	RPKSGGSGHAV/2	2560.5	B07	11	sp|P46013|KI67_HUMAN
28002	11	TPSSKKSAL	TPSSKKSAL/2	2545.64	B07	9	sp|C9J798|RAS4B_HUMAN
27970	11	TPRSYVGVTL	TPRSYVGVTL/2	2542.73	B07	10	sp|Q92535|PIGC_HUMAN
22868	9	RPHYGSVL	RPHYGSVL/2	2540.89	B07	8	sp|P46940|IQGA1_HUMAN
25408	10	SPAGPGRAASL	SPAGPGRAASL/2	2540.8	B07	11	sp|Q9NWT8|AKIP_HUMAN
25382	10	APHEPDGVAL	APHEPDGVAL/2	2538.2	B07	10	sp|O14576|DC1I1_HUMAN
22785	9	LPYKAGLSL	LPYKAGLSL/2	2531.67	B07	9	sp|Q96P48|ARAP1_HUMAN
22777	9	RPTGSVSSTL	RPTGSVSSTL/2	2530.78	B07	10	sp|Q86UK7|ZN598_HUMAN
30280	12	TPKPPSQAL	TPKPPSQAL/2	2523.33	B07	9	sp|Q9NQ66|PLCB1_HUMAN
27746	11	APRKVLGSSTSA	APRKVLGSSTSA/3	2522.36	B07	12	sp|Q15004|PAF15_HUMAN
27733	11	LPRAVNTQAL	LPRAVNTQAL/2	2521.18	B07	10	sp|O60749|SNX2_HUMAN
25109	10	APLPRPGAVL	APLPRPGAVL/2	2510.9	B07	10	sp|O75638|CTAG2_HUMAN
27584	11	SPITGRSKL	SPITGRSKL/2	2507.64	B07	9	sp|Q96E52|OMA1_HUMAN
19926	8	RPMDKTVVF	RPM[147]DKTVVF/3	2490.75	B07	9	sp|Q8NG31|CASC5_HUMAN
29751	12	TPRGGVGSV	TPRGGVGSV/2	2479.25	B07	9	sp|Q9P2G9|KLHL8_HUMAN
27256	11	SPRDITTIKL	SPRDITTIKL/3	2477.82	B07	10	sp|P56589|PEX3_HUMAN
24738	10	RPNGTKVAVL	RPNGTKVAVL/2	2473.8	B07	10	sp|Q8NHH9|ATLA2_HUMAN
29685	12	LPRGAAKAI	LPRGAAKAI/2	2473.75	B07	9	sp|P78381|S35A2_HUMAN
24734	10	APSPRPLSL	APSPRPLSL/2	2473.4	B07	9	sp|Q6NUT3|MFS12_HUMAN
24718	10	KPLGPTAAF	KPLGPTAAF/2	2471.8	B07	9	sp|O60331|PI51C_HUMAN
29613	12	VPRAPTKEEM	VPRAPTKEEM[147]/2	2467.75	B07	10	sp|Q8IZT6|ASPM_HUMAN
29602	12	SPTGTGKSL	SPTGTGKSL/2	2466.83	B07	9	sp|A8MPP1|D11L8_HUMAN
27107	11	KPAPPTKAT	KPAPPTKAT/2	2464.27	B07	9	sp|Q14008|CKAP5_HUMAN
29531	12	VPRLPATAA	VPRLPATAA/2	2460.92	B07	9	sp|Q01581|HMCS1_HUMAN
27066	11	VPPPPHRPL	VPPPPHRPL/2	2460.55	B07	9	sp|Q9Y520|PRC2C_HUMAN
24577	10	APILKRAL	APILKRAL/2	2457.7	B07	8	sp|Q5VSL9|STRP1_HUMAN
29464	12	TPRGAGSYTIM	TPRGAGSYTIM[147]/2	2455.33	B07	11	sp|P21333|FLNA_HUMAN
29441	12	QPRPQSTSLL	QPRPQSTSLL/2	2453.42	B07	10	sp|Q96EP0|RNF31_HUMAN
29427	12	APRAAGTVKEL	APRAAGTVKEL/3	2452.25	B07	11	sp|Q9HBR0|S38AA_HUMAN
29412	12	APRNSPTGL	APRNSPTGL/2	2451	B07	9	sp|P78312|F193A_HUMAN
26909	11	IPRVPSLSV	IPRVPSLSV/2	2446.27	B07	9	sp|P78345|RPP38_HUMAN
26909	11	APKANGTSAL	APKANGTSAL/2	2446.27	B07	10	sp|Q14978|NOLC1_HUMAN
29346	12	RPKKPGQSF	RPKKPGQSF/2	2445.5	B07	9	sp|O15042|SR140_HUMAN
29272	12	HPRVPSLTTV	HPRVPSLTTV/2	2439.33	B07	10	sp|Q9BW19|KIFC1_HUMAN
24391	10	SPAKNPSSL	SPAKNPSSL/2	2439.1	B07	9	sp|Q9GZR7|DDX24_HUMAN
21777	9	KPSTAHHRPL	KPSTAHHRPL/3	2419.67	B07	10	sp|Q08AE8|SPIR1_HUMAN
28992	12	TPRGGVGIATVM	TPRGGVGIATVM[147]/2	2416	B07	12	sp|Q9P2G9|KLHL8_HUMAN
21682	9	RPAETARLRAL	RPAETARLRAL/3	2409.11	B07	11	sp|Q9NQG6|MID51_HUMAN
24054	10	APRDAYWIAM	APRDAYWIAM[147]/2	2405.4	B07	10	sp|O75794|CD123_HUMAN
28863	12	LPRAVGTQTL	LPRAVGTQTL/2	2405.25	B07	10	sp|Q13596|SNX1_HUMAN
24000	10	SPISSNSHRSL	SPISSNSHRSL/2	2400	B07	11	sp|Q9NR09|BIRC6_HUMAN
28782	12	APGPGRKEL	APGPGRKEL/2	2398.5	B07	9	sp|Q9HBH0|RHOF_HUMAN
26379	11	SPRPNIILGL	SPRPNIILGL/2	2398.09	B07	10	sp|Q9BTC0|DIDO1_HUMAN
26354	11	KPRKLVNTI	KPRKLVNTI/2	2395.82	B07	9	sp|Q92900|RENT1_HUMAN
28740	12	VPRQPTVTSV	VPRQPTVTSV/2	2395	B07	10	sp|Q96HC4|PDLI5_HUMAN
28612	12	SPGQRAVL	SPGQRAVL/2	2384.33	B07	8	sp|Q12772|SRBP2_HUMAN
23814	10	APIIRVGGAL	APIIRVGGAL/2	2381.4	B07	10	sp|O60566|BUB1B_HUMAN
23802	10	KPKSYSSSL	KPKSYSSSL/2	2380.2	B07	9	sp|Q9H0H0|INT2_HUMAN
30872	13	VPRSPFKVKVL	VPRSPFKVKVL/3	2374.77	B07	11	sp|P21333|FLNA_HUMAN
26071	11	VPRNYDPAL	VPRNYDPAL/2	2370.09	B07	9	sp|Q9NV06|DCA13_HUMAN
28404	12	SPKPLVTPGSTL	SPKPLVTPGSTL/2	2367	B07	12	sp|Q9GZN2|TGIF2_HUMAN
23636	10	RPVPPPPSL	RPVPPPPSL/2	2363.6	B07	9	sp|P13051|UNG_HUMAN
23619	10	RPSGPGPEL	RPSGPGPEL/2	2361.9	B07	9	sp|P51531|SMCA2_HUMAN
25960	11	VPSKPPMSL	VPSKPPMSL/2	2360	B07	9	sp|Q6AI12|ANR40_HUMAN
25959	11	KPNTSSKRSSL	KPNTSSKRSSL/3	2359.91	B07	11	sp|Q07326|PIGF_HUMAN
28311	12	LPRNNSIGESL	LPRNNSIGESL/2	2359.25	B07	11	sp|Q86VY9|T200A_HUMAN
25895	11	NPRQAAYEM	NPRQAAYEM[147]/2	2354.09	B07	9	sp|Q9H0D6|XRN2_HUMAN
18761	8	MPYSNGRPAL	MPYSNGRPAL/2	2345.12	B07	10	sp|Q16877|F264_HUMAN
25754	11	SPAGLKAVL	SPAGLKAVL/2	2341.27	B07	9	sp|Q6P9B9|INT5_HUMAN
28095	12	LPRTAISEL	LPRTAISEL/2	2341.25	B07	9	sp|Q9NRC8|SIR7_HUMAN
23339	10	KPRDVSSVEL	KPRDVSSVEL/2	2333.9	B07	10	sp|Q01082|SPTB2_HUMAN
27963	12	APRLQSEVAEL	APRLQSEVAEL/2	2330.25	B07	11	sp|P53990|IST1_HUMAN
27880	12	HPRSPNVLSV	HPRSPNVLSV/2	2323.33	B07	10	sp|Q16665|HIF1A_HUMAN
30191	13	HPKKPGPSL	HPKKPGPSL/2	2322.39	B07	9	sp|Q9UMZ2|SYNRG_HUMAN
23190	10	RPSERPSL	RPSERPSL/2	2319	B07	8	sp|Q86V86|PIM3_HUMAN
27820	12	NPRQINWTVL	NPRQINWTVL/2	2318.33	B07	10	sp|P83731|RL24_HUMAN
27818	12	TPRHPLEGTHEL	TPRHPLEGTHEL/3	2318.17	B07	12	sp|Q8IWR0|Z3H7A_HUMAN
27779	12	APAQRAQSL	APAQRAQSL/2	2314.92	B07	9	sp|Q63ZY3|KANK2_HUMAN
27765	12	SPQEARNML	SPQEARNM[147]L/2	2313.75	B07	9	sp|P33240|CSTF2_HUMAN
23133	10	RPSGLHGDVSL	RPSGLHGDVSL/3	2313.3	B07	11	sp|Q9H6E5|STPAP_HUMAN
27754	12	APREPPPVEL	APREPPPVEL/2	2312.83	B07	10	sp|Q13105|ZBT17_HUMAN
30022	13	SPKLPVSSL	SPKLPVSSL/2	2309.39	B07	9	sp|Q99856|ARI3A_HUMAN
20717	9	SPASRSISL	SPASRSISL/2	2301.89	B07	9	sp|P32970|CD70_HUMAN
20628	9	RPSSKKTYSL	RPSSKKTYSL/3	2292	B07	10	sp|Q96Q89|KI20B_HUMAN
29699	13	NPRIPYTEL	NPRIPYTEL/2	2284.54	B07	9	sp|Q92830|KAT2A_HUMAN
31939	14	NPRPTAQDL	NPRPTAQDL/2	2281.36	B07	9	sp|Q9Y2H0|DLGP4_HUMAN
25068	11	LPSQKTASL	LPSQKTASL/2	2278.91	B07	9	sp|Q14684|RRP1B_HUMAN
25068	11	YPRQLESLIRL	YPRQLESLIRL/3	2278.91	B07	11	sp|P33991|MCM4_HUMAN
25036	11	SPSLPNISL	SPSLPNISL/2	2276	B07	9	sp|Q9UQL6|HDAC5_HUMAN
29585	13	APRQPGLMA	APRQPGLM[147]A/2	2275.77	B07	9	sp|Q9Y6H1|CHCH2_HUMAN
25022	11	RPQLKGVVL	RPQLKGVVL/2	2274.73	B07	9	sp|O15235|RT12_HUMAN
22611	10	KPASTSGKSEL	KPASTSGKSEL/2	2261.1	B07	11	sp|O75592|MYCB2_HUMAN
27063	12	KPKYSGTL	KPKYSGTL/2	2255.25	B07	8	sp|P49327|FAS_HUMAN
24731	11	APLPDGRSL	APLPDGRSL/2	2248.27	B07	9	sp|Q15648|MED1_HUMAN
17970	8	RPVPWNAL	RPVPWNAL/2	2246.25	B07	8	sp|Q05923|DUS2_HUMAN
22449	10	NPASRLTAL	NPASRLTAL/2	2244.9	B07	9	sp|O00238|BMR1B_HUMAN
29094	13	VPQKPKVSL	VPQKPKVSL/2	2238	B07	9	sp|P12319|FCERA_HUMAN
17886	8	MPLPGTKAL	MPLPGTKAL/2	2235.75	B07	9	sp|Q9UMZ2|SYNRG_HUMAN
26692	12	KPKKGGGISF	KPKKGGGISF/2	2224.33	B07	10	sp|P55039|DRG2_HUMAN
26688	12	SPYPTKTQTM	SPYPTKTQTM[147]/2	2224	B07	10	sp|P04843|RPN1_HUMAN
28883	13	APKRPPSAF	APKRPPSAF/2	2221.77	B07	9	sp|B2RPK0|HGB1A_HUMAN
26536	12	TPMGPGRTV	TPM[147]GPGRTV/2	2211.33	B07	9	sp|O00214|LEG8_HUMAN
28729	13	VPREPPVSL	VPREPPVSL/2	2209.92	B07	9	sp|Q8TEQ8|PIGO_HUMAN
19878	9	APDRGWMAL	APDRGWM[147]AL/2	2208.67	B07	9	sp|O43292|GPAA1_HUMAN
22067	10	RPSASTQAL	RPSASTQAL/2	2206.7	B07	9	sp|Q16531|DDB1_HUMAN
19791	9	YPRSLFPSL	YPRSLFPSL/2	2199	B07	9	sp|Q9NZJ4|SACS_HUMAN
24171	11	SPDSRASSL	SPDSRASSL/2	2197.36	B07	9	sp|Q9UHB6|LIMA1_HUMAN
24057	11	RPITPGTLRQL	RPITPGTLRQL/3	2187	B07	11	sp|Q9H3H3|CK068_HUMAN
26140	12	RPRIDLIVF	RPRIDLIVF/2	2178.33	B07	9	sp|Q9NSP4|CENPM_HUMAN
26139	12	HPRAYFMQL	HPRAYFMQL/2	2178.25	B07	9	sp|Q9Y2Y1|RPC10_HUMAN
19559	9	RPWLEGRHTL	RPWLEGRHTL/3	2173.22	B07	10	sp|Q9UI10|EI2BD_HUMAN
28230	13	LPRSINTDTL	LPRSINTDTL/2	2171.54	B07	10	sp|Q8NHV4|NEDD1_HUMAN
23877	11	GPLPRAAAL	GPLPRAAAL/2	2170.64	B07	9	sp|Q96KG9|NTKL_HUMAN
26023	12	RPRDALPRLL	RPRDALPRLL/3	2168.58	B07	10	sp|Q86Y56|HEAT2_HUMAN
25948	12	GPQAVRAAL	GPQAVRAAL/2	2162.33	B07	9	sp|O95602|RPA1_HUMAN
23748	11	KPHSGFHVAF	KPHSGFHVAF/3	2158.91	B07	10	sp|Q8IYU8|MICU2_HUMAN
28004	13	APRGTGIVSA	APRGTGIVSA/2	2154.15	B07	10	sp|P15880|RS2_HUMAN
17221	8	RPWSNSRGL	RPWSNSRGL/2	2152.62	B07	9	sp|Q9NRR8|C42S1_HUMAN
30061	14	SPRVPASET	SPRVPASET/2	2147.21	B07	9	sp|Q9HD15|SRA1_HUMAN
27906	13	SPALPGLKL	SPALPGLKL/2	2146.61	B07	9	sp|O14836|TR13B_HUMAN
27863	13	TPQGFRSTL	TPQGFRSTL/2	2143.31	B07	9	sp|Q8N9N2|ASCC1_HUMAN
29957	14	SPRQALTDF	SPRQALTDF/2	2139.79	B07	9	sp|Q8WTW3|COG1_HUMAN
21397	10	SPATWRLGL	SPATWRLGL/2	2139.7	B07	9	sp|O14974|MYPT1_HUMAN
25667	12	APNPYRQAIMSF	APNPYRQAIM[147]SF/2	2138.92	B07	12	sp|Q7RTS9|DYM_HUMAN
27796	13	LPRNIGNAGM	LPRNIGNAGM[147]/2	2138.15	B07	10	sp|Q12912|LRMP_HUMAN
17092	8	RPAPLSAEL	RPAPLSAEL/2	2136.5	B07	9	sp|P53602|MVD1_HUMAN
25625	12	RPQSKAPDSTL	RPQSKAPDSTL/3	2135.42	B07	11	sp|O60291|MGRN1_HUMAN
23460	11	APIGPHLQSM	APIGPHLQSM[147]/2	2132.73	B07	10	sp|Q14152|EIF3A_HUMAN
21323	10	RPAYRKVFL	RPAYRKVFL/3	2132.3	B07	9	sp|Q12772|SRBP2_HUMAN
21276	10	RPAAPGQTPL	RPAAPGQTPL/2	2127.6	B07	10	sp|Q12796|PNRC1_HUMAN
27656	13	VPQVKASAL	VPQVKASAL/2	2127.39	B07	9	sp|Q9NS93|TM7S3_HUMAN
25528	12	KPRNVVFVDM	KPRNVVFVDM[147]/2	2127.33	B07	10	sp|P34932|HSP74_HUMAN
25526	12	APRTVALTALL	APRTVALTALL/2	2127.17	B07	11	sp|P04440|DPB1_HUMAN
29697	14	GPREAFRQL	GPREAFRQL/2	2121.21	B07	9	sp|P57086|SCND1_HUMAN
21149	10	NVRPPNTAL	NVRPPNTAL/2	2114.9	B07	9	sp|Q17RS7|GEN_HUMAN
27272	13	LPRPHASIMF	LPRPHASIMF/3	2097.85	B07	10	sp|Q08211|DHX9_HUMAN
25158	12	RPTAAPRSM	RPTAAPRSM[147]/2	2096.5	B07	9	sp|Q9NQW6|ANLN_HUMAN
18849	9	APASRLLAL	APASRLLAL/2	2094.33	B07	9	sp|Q96S16|JMJD8_HUMAN
29206	14	LPRGSIPRSL	LPRGSIPRSL/3	2086.14	B07	10	sp|Q14566|MCM6_HUMAN
25029	12	RPPPPNSVI	RPPPPNSVI/2	2085.75	B07	9	sp|Q14186|TFDP1_HUMAN
24992	12	APGKKTSGL	APGKKTSGL/2	2082.67	B07	9	sp|Q9UBU8|MO4L1_HUMAN
27069	13	KPQPRPQTL	KPQPRPQTL/2	2082.23	B07	9	sp|Q9NR20|DYRK4_HUMAN
31179	15	SPKPPSQQL	SPKPPSQQL/2	2078.6	B07	9	sp|Q8IZD2|KMT2E_HUMAN
24903	12	RPHNGRWIGCL	RPHNGRWIGCL/3	2075.25	B07	11	sp|Q86W42|THOC6_HUMAN
26941	13	SPHRPLAGL	SPHRPLAGL/2	2072.39	B07	9	sp|Q96AA3|RFT1_HUMAN
28946	14	SPKPPTSMF	SPKPPTSM[147]F/2	2067.57	B07	9	sp|Q99081|HTF4_HUMAN
24809	12	IPRGADNLVAI	IPRGADNLVAI/2	2067.42	B07	11	sp|Q9BZX2|UCK2_HUMAN
26831	13	SPGTRPTAM	SPGTRPTAM[147]/2	2063.92	B07	9	sp|Q8WYA1|BMAL2_HUMAN
24657	12	SPAVERLISSL	SPAVERLISSL/2	2054.75	B07	11	sp|Q9BQ52|RNZ2_HUMAN
24644	12	RPAQPQEHPF	RPAQPQEHPF/3	2053.67	B07	10	sp|Q15437|SC23B_HUMAN
26645	13	MPRHFATKL	M[147]PRHFATKL/3	2049.61	B07	9	sp|O43286|B4GT5_HUMAN
26628	13	KPAGPPGIL	KPAGPPGIL/2	2048.31	B07	9	sp|P35579|MYH9_HUMAN
28654	14	SPGVGKTSL	SPGVGKTSL/2	2046.71	B07	9	sp|Q9NU22|MDN1_HUMAN
20459	10	RPTGGVGAV	RPTGGVGAV/2	2045.9	B07	9	sp|Q01581|HMCS1_HUMAN
28626	14	IPRDPSQQEL	IPRDPSQQEL/2	2044.71	B07	10	sp|P49327|FAS_HUMAN
24486	12	APIGSRGPQL	APIGSRGPQL/2	2040.5	B07	10	sp|Q9BRQ3|NUD22_HUMAN
24473	12	RPKYQFLSL	RPKYQFLSL/2	2039.42	B07	9	sp|O60443|DFNA5_HUMAN
30374	15	SPRFPAQYL	SPRFPAQYL/2	2024.93	B07	9	sp|Q15477|SKIV2_HUMAN
20234	10	RPVASSSTATL	RPVASSSTATL/2	2023.4	B07	11	sp|Q9H422|HIPK3_HUMAN
26293	13	GPALGRSFL	GPALGRSFL/2	2022.54	B07	9	sp|P32970|CD70_HUMAN
26241	13	APVPPPTSL	APVPPPTSL/2	2018.54	B07	9	sp|Q9NTJ4|MA2C1_HUMAN
22202	11	RPSQNNTIGL	RPSQNNTIGL/2	2018.36	B07	10	sp|Q9H0H0|INT2_HUMAN
28255	14	KPRLDTEQL	KPRLDTEQL/2	2018.21	B07	9	sp|Q86UE8|TLK2_HUMAN
30202	15	NPRKVVGQQDL	NPRKVVGQQDL/3	2013.47	B07	11	sp|Q92609|TBCD5_HUMAN
28187	14	SPGPEKMAL	SPGPEKM[147]AL/2	2013.36	B07	9	sp|O75995|SASH3_HUMAN
24055	12	RPTPKNSLM	RPTPKNSLM[147]/2	2004.58	B07	9	sp|O95168|NDUB4_HUMAN
21901	11	KPMMPQESL	KPM[147]M[147]PQESL/2	1991	B07	9	sp|Q5JSZ5|PRC2B_HUMAN
23884	12	APSPPLSGL	APSPPLSGL/2	1990.33	B07	9	sp|Q96GQ5|CP058_HUMAN
21803	11	RPLFPGSTV	RPLFPGSTV/2	1982.09	B07	9	sp|Q00536|CDK16_HUMAN
23757	12	KPSPKTIAF	KPSPKTIAF/2	1979.75	B07	9	sp|Q9BRU9|UTP23_HUMAN
27603	14	HPRDPNLLL	HPRDPNLLL/2	1971.64	B07	9	sp|O75530|EED_HUMAN
25523	13	APARPGPAA	APARPGPAA/2	1963.31	B07	9	sp|Q04637|IF4G1_HUMAN
19596	10	KPAGPPGILAL	KPAGPPGILAL/2	1959.6	B07	11	sp|P35579|MYH9_HUMAN
29383	15	SPEGPSKPSL	SPEGPSKPSL/2	1958.87	B07	10	sp|Q9P1Y5|CAMP3_HUMAN
21546	11	KPVSSNNSL	KPVSSNNSL/2	1958.73	B07	9	sp|O60318|GANP_HUMAN
17561	9	RPAGALVAL	RPAGALVAL/2	1951.22	B07	9	sp|Q2T9J0|TYSD1_HUMAN
21462	11	RPAEVGGMQL	RPAEVGGM[147]QL/2	1951.09	B07	10	sp|P33316|DUT_HUMAN
25312	13	SPALKTTRL	SPALKTTRL/2	1947.08	B07	9	sp|Q5SW79|CE170_HUMAN
25298	13	SPLKKEQPL	SPLKKEQPL/2	1946	B07	9	sp|Q53H80|AKIR2_HUMAN
25293	13	SPANPAHIL	SPANPAHIL/2	1945.62	B07	9	sp|Q9H967|WDR76_HUMAN
25285	13	LPALPTQAL	LPALPTQAL/2	1945	B07	9	sp|Q9P2Q2|FRM4A_HUMAN
25253	13	APNPYRQAIM	APNPYRQAIM[147]/2	1942.54	B07	10	sp|Q7RTS9|DYM_HUMAN
27116	14	TPRDLAVPAAL	TPRDLAVPAAL/2	1936.86	B07	11	sp|Q8TEM1|PO210_HUMAN
27114	14	SPNKHNRL	SPNKHNRL/2	1936.71	B07	8	sp|P13639|EF2_HUMAN
23171	12	SPMPPSEVKL	SPM[147]PPSEVKL/2	1930.92	B07	10	sp|Q9BWG6|SCNM1_HUMAN
23135	12	YPRFLKSDIYL	YPRFLKSDIYL/3	1927.92	B07	11	sp|Q08116|RGS1_HUMAN
21074	11	SPQAPTHFL	SPQAPTHFL/2	1915.82	B07	9	sp|P49773|HINT1_HUMAN
28623	15	LPRSIGNLTQL	LPRSIGNLTQL/2	1908.2	B07	11	sp|Q6UWE0|LRSM1_HUMAN
26693	14	RPTLEGRELSL	RPTLEGRELSL/3	1906.64	B07	11	sp|Q9NU22|MDN1_HUMAN
26649	14	IPRSILMTTF	IPRSILM[147]TTF/2	1903.5	B07	10	sp|Q16531|DDB1_HUMAN
24714	13	APALARTLQSL	APALARTLQSL/2	1901.08	B07	11	sp|Q96HA7|TONSL_HUMAN
15167	8	RPWLRPAAL	RPWLRPAAL/3	1895.88	B07	9	sp|Q8N4S7|PAQR4_HUMAN
18907	10	RVRPLTKNAL	RVRPLTKNAL/3	1890.7	B07	10	sp|P15735|PHKG2_HUMAN
26382	14	SPNQSLRLGL	SPNQSLRLGL/2	1884.43	B07	10	sp|Q96B01|R51A1_HUMAN
18797	10	RPSSQYIVAL	RPSSQYIVAL/2	1879.7	B07	10	sp|Q9GIP4|LAT1L_HUMAN
30013	16	SPRPPAEGF	SPRPPAEGF/2	1875.81	B07	9	sp|Q9BWN1|PRR14_HUMAN
22497	12	SPVLSLSSL	SPVLSLSSL/2	1874.75	B07	9	sp|O15533|TPSN_HUMAN
22473	12	APAAPSATAL	APAAPSATAL/2	1872.75	B07	10	sp|Q8N5H7|SH2D3_HUMAN
29807	16	TPKKLGNSL	TPKKLGNSL/2	1862.94	B07	9	sp|Q14980|NUMA1_HUMAN
24192	13	APVLPHTAV	APVLPHTAV/2	1860.92	B07	9	sp|Q6PCT2|FXL19_HUMAN
22318	12	SPFKRQLSL	SPFKRQLSL/2	1859.83	B07	9	sp|Q9Y6R0|NUMBL_HUMAN
22282	12	KPRDVSSV	KPRDVSSV/2	1856.83	B07	8	sp|Q01082|SPTB2_HUMAN
29691	16	LPKQPPLAL	LPKQPPLAL/2	1855.69	B07	9	sp|Q96S59|RANB9_HUMAN
22266	12	MPRGVVVTL	MPRGVVVTL/2	1855.5	B07	9	sp|Q9ULT8|HECD1_HUMAN
25969	14	HPRDPNLLLSV	HPRDPNLLLSV/2	1854.93	B07	11	sp|O75530|EED_HUMAN
27807	15	TPSRKGLVL	TPSRKGLVL/2	1853.8	B07	9	sp|Q9H4L4|SENP3_HUMAN
25935	14	VPAENKSVL	VPAENKSVL/2	1852.5	B07	9	sp|A2RUB6|CCD66_HUMAN
22190	12	KPVNRISL	KPVNRISL/2	1849.17	B07	8	sp|Q9UKK3|PARP4_HUMAN
29568	16	SPRAPVSPLKF	SPRAPVSPLKF/2	1848	B07	11	sp|Q9UBS0|KS6B2_HUMAN
24023	13	APAPRPSLL	APAPRPSLL/2	1847.92	B07	9	sp|Q92620|PRP16_HUMAN
31411	17	GPEKTRSQL	GPEKTRSQL/2	1847.71	B07	9	sp|Q15833|STXB2_HUMAN
27680	15	FPNIPGKSL	FPNIPGKSL/2	1845.33	B07	9	sp|O15121|DEGS1_HUMAN
23780	13	IPLLGKSSL	IPLLGKSSL/2	1829.23	B07	9	sp|Q9NYP3|DONS_HUMAN
27375	15	SPGPRPVL	SPGPRPVL/2	1825	B07	8	sp|Q5VV67|PPRC1_HUMAN
19971	11	RPIMFRGEV	RPIM[147]FRGEV/3	1815.55	B07	9	sp|Q13283|G3BP1_HUMAN
21725	12	YPAAKRVKL	YPAAKRVKL/2	1810.42	B07	9	sp|P01106|MYC_HUMAN
27133	15	IPKTSGSEM	IPKTSGSEM[147]/2	1808.87	B07	9	sp|Q86T24|KAISO_HUMAN
27102	15	IPSIRNGIL	IPSIRNGIL/2	1806.8	B07	9	sp|Q93008|USP9X_HUMAN
25188	14	APSKPAASI	APSKPAASI/2	1799.14	B07	9	sp|O60264|SMCA5_HUMAN
26748	15	APASPFRQL	APASPFRQL/2	1783.2	B07	9	sp|Q07021|C1QBP_HUMAN
21381	12	AARPATSTL	AARPATSTL/2	1781.75	B07	9	sp|Q04637|IF4G1_HUMAN
28453	16	LPRPPPPEM	LPRPPPPEM[147]/2	1778.31	B07	9	sp|Q00325|MPCP_HUMAN
14193	8	RPIQALMAI	RPIQALM[147]AI/2	1774.12	B07	9	sp|Q5J8M3|EMC4_HUMAN
30117	17	TPRIQGLTV	TPRIQGLTV/2	1771.59	B07	9	sp|Q14204|DYHC1_HUMAN
24722	14	APGKRILVL	APGKRILVL/2	1765.86	B07	9	sp|O60870|KIN17_HUMAN
24679	14	APNYRLKSL	APNYRLKSL/2	1762.79	B07	9	sp|Q9HBM6|TAF9B_HUMAN
26401	15	KPVYPGQTL	KPVYPGQTL/2	1760.07	B07	9	sp|P51659|DHB4_HUMAN
28144	16	RPREAEVRF	RPREAEVRF/3	1759	B07	9	sp|Q13438|OS9_HUMAN
22848	13	APARASVIL	APARASVIL/2	1757.54	B07	9	sp|Q9NUQ8|ABCF3_HUMAN
22789	13	RPSGAATTTAA	RPSGAATTTAA/2	1753	B07	11	sp|Q86TM6|SYVN1_HUMAN
22758	13	HPRYNLIVV	HPRYNLIVV/2	1750.62	B07	9	sp|Q92466|DDB2_HUMAN
26253	15	IPRITIEM	IPRITIEM[147]/2	1750.2	B07	8	sp|P11388|TOP2A_HUMAN
31478	18	SPKIPGIDL	SPKIPGIDL/2	1748.78	B07	9	sp|Q15034|HERC3_HUMAN
26197	15	APSGTRVVQVL	APSGTRVVQVL/2	1746.47	B07	11	sp|Q9UN70|PCDGK_HUMAN
27896	16	VPSAPGRVL	VPSAPGRVL/2	1743.5	B07	9	sp|P54296|MYOM2_HUMAN
26121	15	KPRNVQILNM	KPRNVQILNM[147]/2	1741.4	B07	10	sp|Q5SRD1|TI23B_HUMAN
26098	15	SPRYIFTML	SPRYIFTM[147]L/2	1739.87	B07	9	sp|Q02880|TOP2B_HUMAN
22612	13	MPAFSKIGGIL	M[147]PAFSKIGGIL/2	1739.38	B07	11	sp|P46940|IQGA1_HUMAN
22587	13	GPAPRVLSL	GPAPRVLSL/2	1737.46	B07	9	sp|P49750|YLPM1_HUMAN
24314	14	RPADPEKNQSL	RPADPEKNQSL/3	1736.71	B07	11	sp|Q9H8H0|NOL11_HUMAN
25960	15	LPSTRLGTL	LPSTRLGTL/2	1730.67	B07	9	sp|Q7KZF4|SND1_HUMAN
[truncated: 634 more rows]

## Sheet: SW_n=1
Figure 1-source data 1. Comparative analysis of DDA and SWATH-MS for the identification of HLA class I peptides. List of JY HLA-A and -B peptides that were identified by SWATH (n=1) using OpenSWATH and a combined HLA-A and -B peptide assay library (1% pep-level FDR; m-score<0.01).
[truncated: 3,302 more rows]

[truncated: 3 more sheets: SW_n=2, SW_n=3, SpecLib]
