# Supplementary material for: An open-source computational and data resource to analyze digital maps of immunopeptidomes
Source: eLife journal article supplement (doi:10.7554/elife.07661), 2015-07-08
Supplement: supp [file elife-07661-supp-v1.zip › elife_poa_e07661_Figure_2_figure_supplement_1.pdf]

**A**

| Peptide    | Predicted HLA binding affinity<br>(IC <sub>50</sub> , nM) |       |       |       | Annotation<br>score | HLA allele    |
|------------|-----------------------------------------------------------|-------|-------|-------|---------------------|---------------|
|            | A02                                                       | A03   | B35   | B39   |                     |               |
| ILYGPPGTGK | 21158                                                     | 12    | 33079 | 21637 | 1763                | A03           |
| KLEEQARAK  | 26350                                                     | 278   | 36233 | 21400 | 77                  | A03           |
| LTGPVMPVR  | 25402                                                     | 6839  | 31339 | 21741 | 3                   | A03           |
| TGGANLGRIG | 28787                                                     | 23561 | 35417 | 22213 | 1                   | Non-annotated |

**B**

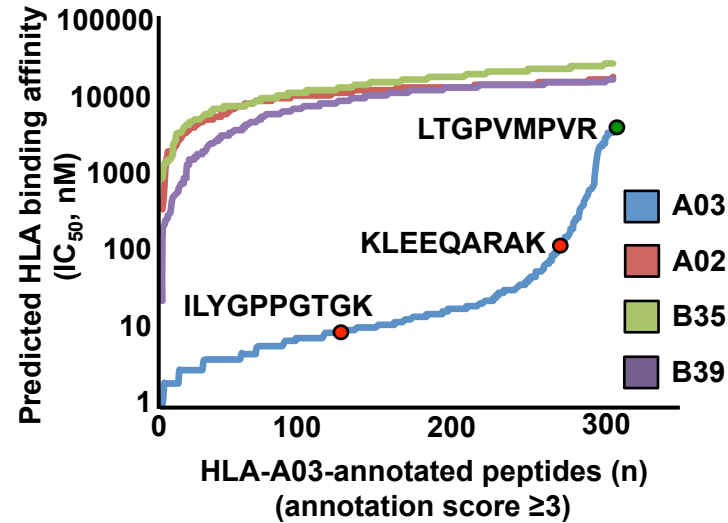

**C**

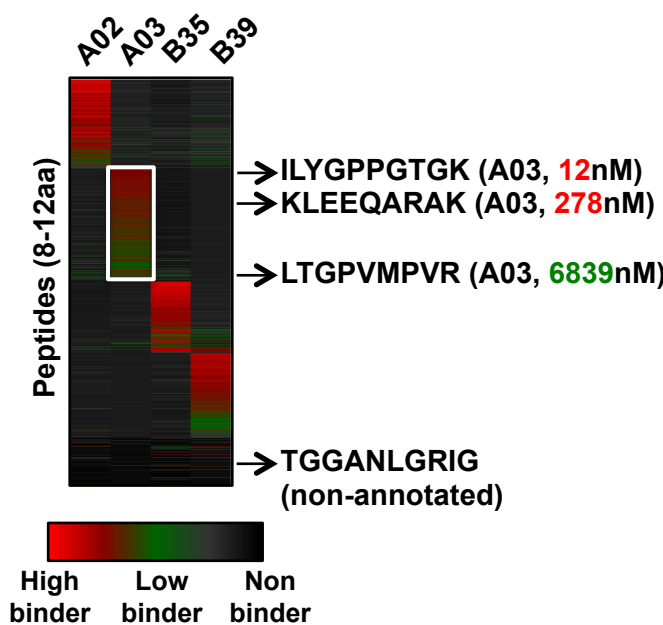

**Figure 2—figure supplement 1. Automated NetMHC-based method for annotating and visualizing HLA allele-specific peptides.** PBMC#2 was typed positive for HLA-A02, -A03, -B35, -B39, and is shown here as a representative sample. **(A)** The stand-alone software package of the HLA binding prediction algorithm NetMHC 3.4 was used to predict the binding affinity of all identified peptides to HLA-A02, -A03, -B35 and -B39 (four peptides are shown for simplicity). For each peptide, an annotation score was calculated by dividing the second lowest IC<sub>50</sub> value (second best predicted allele) by the lowest IC<sub>50</sub> value (best predicted allele). Peptides with a score ≥3 were annotated to the HLA allele predicted to bind best. Peptides with a score below 3 were considered as non-annotated. Non-annotated peptides were curated in the output files in Figure 2—source data 2 and correspond to 1) non-HLA peptides/contaminants, 2) peptides predicted to strongly bind more than one HLA allele (supertype peptides), 3) peptides predicted to bind HLA-C alleles, 4) exceptional HLA peptides with no known binding motifs. Annotation scores of all eluted peptides are shown in Figure 2—source data 2. Additional information is provided in Supplementary file 1. **(B)** Curves showing the distribution of the predicted HLA binding affinities for all HLA-A03-annotated peptides with a score ≥3. Overall, 91% of all HLA-A03-annotated peptides are predicted to have a binding affinity below 500 nM for the HLA-A03 molecule (see also Figure 2—figure supplement 4 and Figure 2—figure supplement 5). The same peptides are predicted to be non-binders for the other alleles – i.e., HLA-A02, -B35 and -B39. **(C)** Heat map visualization following clustering of predicted HLA binding affinity values. The white box highlights HLA-A03-annotated peptides. The four peptides in the table in (a) are indicated by arrows and their respective predicted binding affinity for the HLA-A03 molecule is indicated in parenthesis.
