# Supplementary material for: An open-source computational and data resource to analyze digital maps of immunopeptidomes
Source: eLife journal article supplement (doi:10.7554/elife.07661), 2015-07-08
Supplement: supp [file elife-07661-supp-v1.zip › elife_poa_e07661_Figure_2_source_data_4.xlsx]

## Sheet: PeptideAtlas
Figure 2-source data 4. HLA class I allele-specific peptide spectral libraries stored in PeptideAtlas.
Name	Source/cell type	Peptide form	Instrument	Format
A01_human_Orbitrap.sptxt	PBMC	Eluted	OrbitrapXL	Speclib
A01_human_Orbitrap.splib	PBMC	Eluted	OrbitrapXL	Speclib
A02_human_Orbitrap.sptxt	PBMC, JY	Eluted	OrbitrapXL	Speclib
A02_human_Orbitrap.splib	PBMC, JY	Eluted	OrbitrapXL	Speclib
A03_human_Orbitrap.sptxt	PBMC	Eluted	OrbitrapXL	Speclib
A03_human_Orbitrap.splib	PBMC	Eluted	OrbitrapXL	Speclib
A11_human_Orbitrap.sptxt	PBMC	Eluted	OrbitrapXL	Speclib
A11_human_Orbitrap.splib	PBMC	Eluted	OrbitrapXL	Speclib
A23_human_Orbitrap.sptxt	PBMC	Eluted	OrbitrapXL	Speclib
A23_human_Orbitrap.splib	PBMC	Eluted	OrbitrapXL	Speclib
A24_human_Orbitrap.sptxt	PBMC	Eluted	OrbitrapXL	Speclib
A24_human_Orbitrap.splib	PBMC	Eluted	OrbitrapXL	Speclib
A25_human_Orbitrap.sptxt	PBMC	Eluted	OrbitrapXL	Speclib
A25_human_Orbitrap.splib	PBMC	Eluted	OrbitrapXL	Speclib
A29_human_Orbitrap.sptxt	PBMC	Eluted	OrbitrapXL	Speclib
A29_human_Orbitrap.splib	PBMC	Eluted	OrbitrapXL	Speclib
A30_human_Orbitrap.sptxt	PBMC	Eluted	OrbitrapXL	Speclib
A30_human_Orbitrap.splib	PBMC	Eluted	OrbitrapXL	Speclib
A32_human_Orbitrap.sptxt	PBMC	Eluted	OrbitrapXL	Speclib
A32_human_Orbitrap.splib	PBMC	Eluted	OrbitrapXL	Speclib
B07_human_Orbitrap.sptxt	PBMC, JY	Eluted	OrbitrapXL	Speclib
B07_human_Orbitrap.splib	PBMC, JY	Eluted	OrbitrapXL	Speclib
B08_human_Orbitrap.sptxt	PBMC	Eluted	OrbitrapXL	Speclib
B08_human_Orbitrap.splib	PBMC	Eluted	OrbitrapXL	Speclib
B27_human_Orbitrap.sptxt	PBMC	Eluted	OrbitrapXL	Speclib
B27_human_Orbitrap.splib	PBMC	Eluted	OrbitrapXL	Speclib
B27_human_TripleTOF.sptxt	C1R	Eluted	5600TripleTOF	Speclib
B27_human_TripleTOF.sptlib	C1R	Eluted	5600TripleTOF	Speclib
B35_human_Orbitrap.sptxt	PBMC	Eluted	OrbitrapXL	Speclib
B35_human_Orbitrap.splib	PBMC	Eluted	OrbitrapXL	Speclib
B39_human_Orbitrap.sptxt	PBMC	Eluted	OrbitrapXL	Speclib
B39_human_Orbitrap.splib	PBMC	Eluted	OrbitrapXL	Speclib
B44_human_Orbitrap.sptxt	PBMC	Eluted	OrbitrapXL	Speclib
B44_human_Orbitrap.splib	PBMC	Eluted	OrbitrapXL	Speclib
B51_human_Orbitrap.sptxt	PBMC	Eluted	OrbitrapXL	Speclib
B51_human_Orbitrap.splib	PBMC	Eluted	OrbitrapXL	Speclib
B57_human_Orbitrap.sptxt	PBMC	Eluted	OrbitrapXL	Speclib
B57_human_Orbitrap.splib	PBMC	Eluted	OrbitrapXL	Speclib
C04_human_TripleTOF.sptxt	C1R	Eluted	5600TripleTOF	Speclib
C04_human_TripleTOF.splib	C1R	Eluted	5600TripleTOF	Speclib
