# Supplementary material for: An open-source computational and data resource to analyze digital maps of immunopeptidomes
Source: eLife journal article supplement (doi:10.7554/elife.07661), 2015-07-08
Supplement: supp [file elife-07661-supp-v1.zip › elife_poa_e07661_Figure_2_source_data_5.xlsx]

## Sheet: SWATHAtlas
Figure 2-source data 5. HLA class I and II allele-specific peptide assay libraries stored in the SWATHAtlas database.
Name	Source/cell type	Peptide form	Instrument	Format
A02_human_TripleTOF_decoys.TraML	JY	Eluted	5600TripleTOF	TraML
A02_human_TripleTOF_openswath.csv	JY	Eluted	5600TripleTOF	OpenSWATH
A02_human_TripleTOF.sptxt	JY	Eluted	5600TripleTOF	Speclib
A02_human_TripleTOF.splib	JY	Eluted	5600TripleTOF	Speclib
A03_human_TripleTOF_decoys.TraML	Jurkat, PBMC	Eluted	5600TripleTOF	TraML
A03_human_TripleTOF_openswath.csv	Jurkat, PBMC	Eluted	5600TripleTOF	OpenSWATH
A03_human_TripleTOF.sptxt	Jurkat, PBMC	Eluted	5600TripleTOF	Speclib
A03_human_TripleTOF.splib	Jurkat, PBMC	Eluted	5600TripleTOF	Speclib
A26_human_TripleTOF_decoys.TraML	PBMC	Eluted	5600TripleTOF	TraML
A26_human_TripleTOF_openswath.csv	PBMC	Eluted	5600TripleTOF	OpenSWATH
A26_human_TripleTOF.sptxt	PBMC	Eluted	5600TripleTOF	Speclib
A26_human_TripleTOF.splib	PBMC	Eluted	5600TripleTOF	Speclib
B07_human_TripleTOF_decoys.TraML	JY, Jurkat	Eluted	5600TripleTOF	TraML
B07_human_TripleTOF_openswath.csv	JY, Jurkat	Eluted	5600TripleTOF	OpenSWATH
B07_human_TripleTOF.sptxt	JY, Jurkat	Eluted	5600TripleTOF	Speclib
B07_human_TripleTOF.splib	JY, Jurkat	Eluted	5600TripleTOF	Speclib
B35_human_TripleTOF_decoys.TraML	Jurkat	Eluted	5600TripleTOF	TraML
B35_human_TripleTOF_openswath.csv	Jurkat	Eluted	5600TripleTOF	OpenSWATH
B35_human_TripleTOF.sptxt	Jurkat	Eluted	5600TripleTOF	Speclib
B35_human_TripleTOF.splib	Jurkat	Eluted	5600TripleTOF	Speclib
B39_human_TripleTOF_decoys.TraML	C1R	Eluted	5600TripleTOF	TraML
B39_human_TripleTOF_openswath.csv	C1R	Eluted	5600TripleTOF	OpenSWATH
B39_human_TripleTOF.sptxt	C1R	Eluted	5600TripleTOF	Speclib
B39_human_TripleTOF.splib	C1R	Eluted	5600TripleTOF	Speclib
B40_human_TripleTOF_decoys.TraML	C1R	Eluted	5600TripleTOF	TraML
B40_human_TripleTOF_openswath.csv	C1R	Eluted	5600TripleTOF	OpenSWATH
B40_human_TripleTOF.sptxt	C1R	Eluted	5600TripleTOF	Speclib
B40_human_TripleTOF.splib	C1R	Eluted	5600TripleTOF	Speclib
B51_human_TripleTOF_decoys.TraML	PBMC	Eluted	5600TripleTOF	TraML
B51_human_TripleTOF_openswath.csv	PBMC	Eluted	5600TripleTOF	OpenSWATH
B51_human_TripleTOF.sptxt	PBMC	Eluted	5600TripleTOF	Speclib
B51_human_TripleTOF.splib	PBMC	Eluted	5600TripleTOF	Speclib
B57_human_TripleTOF_decoys.TraML	PBMC	Eluted	5600TripleTOF	TraML
B57_human_TripleTOF_openswath.csv	PBMC	Eluted	5600TripleTOF	OpenSWATH
B57_human_TripleTOF.sptxt	PBMC	Eluted	5600TripleTOF	Speclib
B57_human_TripleTOF.splib	PBMC	Eluted	5600TripleTOF	Speclib
C04_human_TripleTOF.decoys.TraML	C1R	Eluted	5600TripleTOF	TraML
C04_human_TripleTOF_openswath.csv	C1R	Eluted	5600TripleTOF	OpenSWATH
C04_human_TripleTOF.sptxt	C1R	Eluted	5600TripleTOF	Speclib
C04_human_TripleTOF.splib	C1R	Eluted	5600TripleTOF	Speclib
DR/DP/DQ_Mtb_TripleTOF_decoys.TraML	-	Synthetic	5600TripleTOF	TraML
DR/DP/DQ_Mtb_TripleTOF_openswath.csv	-	Synthetic	5600TripleTOF	OpenSWATH
DR/DP/DQ_Mtb_TripleTOF.sptxt	-	Synthetic	5600TripleTOF	Speclib
DR/DP/DQ_Mtb_TripleTOF.splib	-	Synthetic	5600TripleTOF	Speclib
DR/DP/DQ_Mtb_ELITE_CID.sptxt	-	Synthetic	ELITE_CID	Speclib
DR/DP/DQ_Mtb_ELITE_HCD.sptxt	-	Synthetic	ELITE_HCD	Speclib
Libraries can be found at: https://db.systemsbiology.net/sbeams/cgi/PeptideAtlas/GetDIALibs?SBEAMSentrycode=HLASWATH2015
