# Supplementary material for: An open-source computational and data resource to analyze digital maps of immunopeptidomes
Source: eLife journal article supplement (doi:10.7554/elife.07661), 2015-07-08
Supplement: supp [file elife-07661-supp-v1.zip › elife_poa_e07661_Figure_3_figure_supplement_6.pdf]

SWATH\_HLA\_B4002.tsv

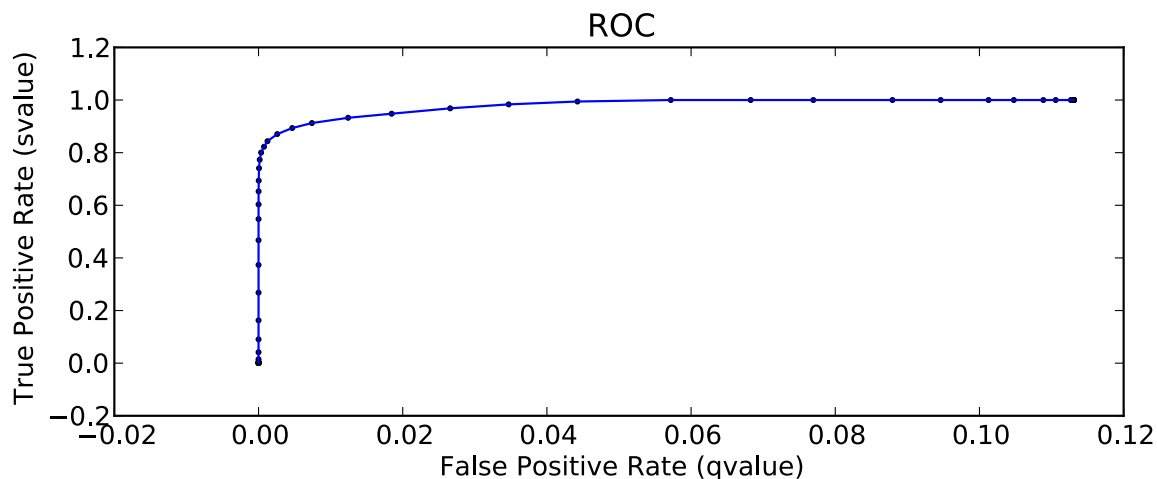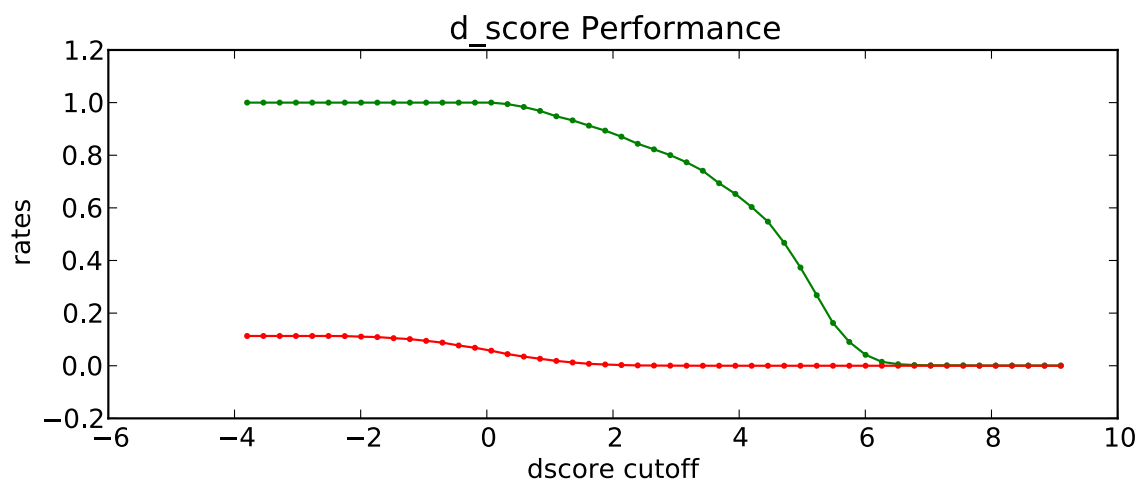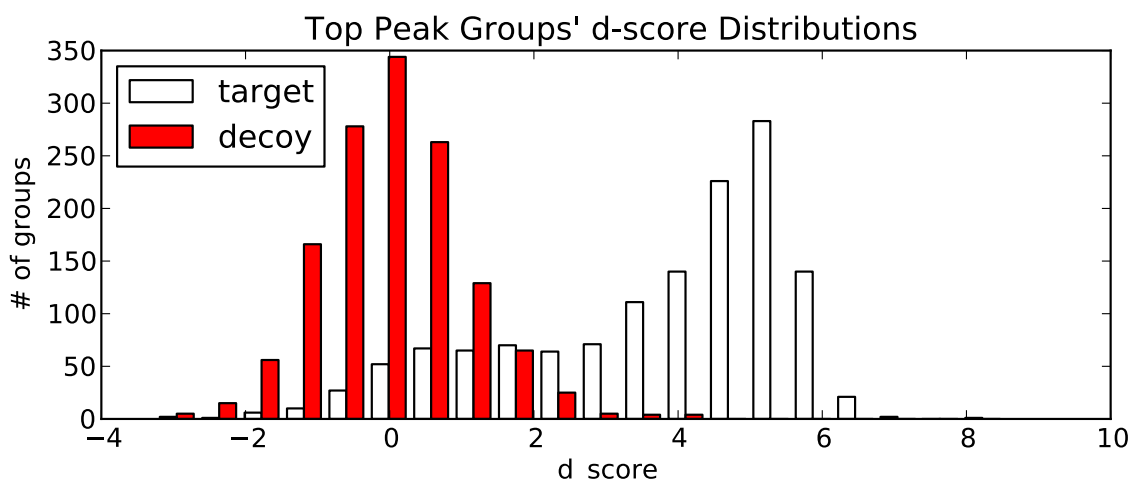

**Figure 3—figure supplement 6. OpenSWATH analysis and PyProphet statistics of HLA peptidomic data acquired at Centro Nacional de Biotechnología, Madrid, Spain.** HLA-B40 peptides were isolated from C1R cells. Graphs showing ROC, d\_score performance and d-score distributions were generated automatically using the iPortal workflow.
