# Supplementary material for: An open-source computational and data resource to analyze digital maps of immunopeptidomes
Source: eLife journal article supplement (doi:10.7554/elife.07661), 2015-07-08
Supplement: supp [file elife-07661-supp-v1.zip › elife_poa_e07661_Figure_3_source_data_1.xlsx]

## Sheet: JY_10Da
Figure 3-source data 1. OpenSWATH analysis of JY cells (HLA-A02 and -B07) (SWATH windows of 10 Da width each size)
Peptide	Protein	Intensity_carone_L130326_004_SW_pMHC_1-5ug_with_dscore.csv_0_0	RT_carone_L130326_004_SW_pMHC_1-5ug_with_dscore.csv_0_0	score_carone_L130326_004_SW_pMHC_1-5ug_with_dscore.csv_0_0	RT_mean	RT_std	pg_pvalue
2603_LPLARVKAL_2_run0	1/sp|Q9NR33|DPOE4_HUMAN	148877	3024.41	1.60711e-09	3024.41	0	8.28143e-10
413_GLIDKVNEL_2_run0	1/sp|P61011|SRP54_HUMAN	555093	3705.64	1.60711e-09	3705.64	0	3.10705e-10
1302_TLLNVIKSV_2_run0	1/sp|Q14643|ITPR1_HUMAN	40524	4535.82	1.60711e-09	4535.82	0	3.37e-10
2375_KPINVRVTTM_2_run0	2/sp|P35241|RADI_HUMAN/sp|P15311|EZRI_HUMAN	95908	2378.09	1.60711e-09	2378.09	0	9.68272e-10
1920_APRSVAVSSI_2_run0	1/sp|Q6UWB1|I27RA_HUMAN	583981	2338.27	1.60711e-09	2338.27	0	8.27629e-10
474_GLWGPEEEPHL_2_run0	1/sp|Q5JSZ5|PRC2B_HUMAN	73265	4336.19	1.60711e-09	4336.19	0	6.90446e-10
1075_RLIQESPTL_2_run0	1/sp|Q6P1A2|MBOA5_HUMAN	318101	2983.8	1.60711e-09	2983.8	0	9.63005e-10
1566_YLTNEGIQYL_2_run0	1/sp|P46783|RS10_HUMAN	142958	4476.37	1.60711e-09	4476.37	0	2.85947e-10
3805_TPMPKDVRQSL_3_run0	1/sp|Q9NSV4|DIAP3_HUMAN	89623	2450.52	1.60711e-09	2450.52	0	4.17624e-10
2870_RPAEVGGM(UniMod:35)QL_2_run0	1/sp|P33316|DUT_HUMAN	184630	1940.8	1.60711e-09	1940.8	0	7.77737e-10
3840_TPRVPDNSL_2_run0	1/sp|Q13829|BACD2_HUMAN	242562	2313.82	1.60711e-09	2313.82	0	2.84275e-10
2278_IPRQVAQTL_2_run0	1/sp|Q14703|MBTP1_HUMAN	191154	2577.11	1.60711e-09	2577.11	0	5.05723e-10
2224_IPAKLHNSL_2_run0	1/sp|Q00341|VIGLN_HUMAN	323211	1928.42	1.60711e-09	1928.42	0	4.60311e-10
3532_SPNQSLRLGL_2_run0	1/sp|Q96B01|R51A1_HUMAN	182415	3501.83	1.60711e-09	3501.83	0	1.04676e-09
381_GLADNTVIAKV_2_run0	1/sp|P26639|SYTC_HUMAN	79185	3425.89	1.60711e-09	3425.89	0	1.11217e-10
2204_HPRSPNVLSV_2_run0	1/sp|Q16665|HIF1A_HUMAN	168425	2255.34	1.60711e-09	2255.34	0	5.74783e-10
3338_SASVQRADTSL_2_run0	1/sp|O76080|ZFAN5_HUMAN	65638	1788.24	1.60711e-09	1788.24	0	7.78659e-10
2263_IPRDPSQQEL_2_run0	1/sp|P49327|FAS_HUMAN	181688	2228.41	1.60711e-09	2228.41	0	4.91636e-10
3301_RPYQPLGAL_2_run0	1/sp|Q9Y5Y2|NUBP2_HUMAN	230902	3365.11	1.60711e-09	3365.11	0	9.37796e-10
2570_LPATRGYAL_2_run0	1/sp|O75843|AP1G2_HUMAN	164473	2942.89	1.60711e-09	2942.89	0	6.62261e-10
2246_IPKPLNPAL_2_run0	1/sp|P62952|BLCAP_HUMAN	125308	3244.36	1.60711e-09	3244.36	0	6.03736e-10
1834_APREGISQEAL_2_run0	1/sp|Q9Y490|TLN1_HUMAN	153946	2348.98	1.60711e-09	2348.98	0	9.75551e-10
2670_LPSGDRVAVSV_2_run0	1/sp|Q9BRZ2|TRI56_HUMAN	140875	2929.38	1.60711e-09	2929.38	0	4.97924e-10
3207_RPRPTEATVSL_2_run0	1/sp|Q92619|HMHA1_HUMAN	174819	2141.61	1.60711e-09	2141.61	0	4.19074e-11
3463_SPIKDIISL_2_run0	1/sp|Q9C0A0|CNTP4_HUMAN	203630	4429.07	1.60711e-09	4429.07	0	9.1543e-10
3358_SPAIGRTSI_2_run0	1/sp|Q9C0D2|K1731_HUMAN	117382	2255.36	1.60711e-09	2255.36	0	5.1507e-10
378_GLADASLLKKV_2_run0	1/sp|Q9UBB4|ATX10_HUMAN	51304	3520.74	1.60711e-09	3520.74	0	8.5201e-10
3053_RPKSNIVLL_2_run0	1/sp|P11836|CD20_HUMAN	1696090	2723.39	1.60711e-09	2723.39	0	1.01974e-09
3561_SPQPRLIYL_2_run0	1/sp|Q96A54|ADR1_HUMAN	212184	4118.04	1.60711e-09	4118.04	0	8.481e-10
652_KLAESVEKA_2_run0	1/sp|Q9Y5B9|SP16H_HUMAN	35734	1164.14	1.60711e-09	1164.14	0	7.37427e-10
1004_NMVDIIHSV_2_run0	1/sp|P05166|PCCB_HUMAN	164115	4299.94	1.60711e-09	4299.94	0	6.40348e-10
846_KVLGIVVGV_2_run0	1/sp|A5YKK6|CNOT1_HUMAN	55088	4066.74	1.60711e-09	4066.74	0	2.67707e-10
1540_YLNNVVEQL_2_run0	1/sp|Q13257|MD2L1_HUMAN	69226	4326.19	1.60711e-09	4326.19	0	5.2403e-10
2673_LPSLARSAL_2_run0	1/sp|A3KMH1|VWA8_HUMAN	86970	3436.79	1.60711e-09	3436.79	0	3.40078e-11
3725_SPTYRALLL_2_run0	1/sp|P49795|RGS19_HUMAN	111383	4119.11	1.60711e-09	4119.11	0	1.88457e-10
2836_QPSPARAPAEL_2_run0	1/sp|Q13794|APR_HUMAN	252824	2284.15	1.60711e-09	2284.15	0	2.42425e-10
813_KMADEDALRKI_3_run0	1/sp|Q5VTR2|BRE1A_HUMAN	33163	2314.57	1.60711e-09	2314.57	0	1.09924e-10
928_LLQEVEHQL_2_run0	1/sp|O94972|TRI37_HUMAN	62648	3356.89	1.60711e-09	3356.89	0	8.03459e-10
476_GLWGTVVNI_2_run0	1/sp|Q86VV8|RTTN_HUMAN	30504	5670.35	1.60711e-09	5670.35	0	3.07586e-10
2681_LPSSIRTKAL_2_run0	1/sp|Q9BY77|PDIP3_HUMAN	151530	2329.2	1.60711e-09	2329.2	0	4.15456e-10
2552_LLREVGTAL_2_run0	1/sp|Q9BZ29|DOCK9_HUMAN	175555	3142.85	1.60711e-09	3142.85	0	9.19614e-10
461_GLTSTDLLFHL_2_run0	1/sp|Q14181|DPOA2_HUMAN	118002	5667.78	1.60711e-09	5667.78	0	8.5894e-10
3092_RPNGTKVAVLL_2_run0	1/sp|Q8NHH9|ATLA2_HUMAN	77415	2812.02	1.60711e-09	2812.02	0	8.45035e-10
312_FLSSVIQNL_2_run0	1/sp|Q99460|PSMD1_HUMAN	125417	5163.85	1.60711e-09	5163.85	0	4.39142e-10
2663_LPRVTELAL_2_run0	1/sp|P78527|PRKDC_HUMAN	407786	4350.73	1.60711e-09	4350.73	0	5.51099e-10
927_LLQDKQFEL_2_run0	1/sp|Q96JC1|VPS39_HUMAN	144578	3873.93	1.60711e-09	3873.93	0	9.98329e-10
2366_KPHNPGFGM_2_run0	1/sp|Q12906|ILF3_HUMAN	51430	1749.59	1.60711e-09	1749.59	0	9.99725e-10
803_KLYGKPIRV_2_run0	1/sp|Q15427|SF3B4_HUMAN	60909	1834.44	1.60711e-09	1834.44	0	7.11515e-11
1910_APRSEVEAL_2_run0	1/sp|Q9Y3P9|RBGP1_HUMAN	363588	2099.09	1.60711e-09	2099.09	0	8.34632e-10
2617_LPPTALVGL_2_run0	1/sp|Q15436|SC23A_HUMAN	193644	4869.98	1.60711e-09	4869.98	0	8.63565e-10
3928_VPRPIFSQL_2_run0	1/sp|Q9C091|GRB1L_HUMAN	130869	4101.36	1.60711e-09	4101.36	0	2.59457e-10
3705_SPSVDKARAEL_2_run0	1/sp|Q9BY66|KDM5D_HUMAN	112472	2051.51	1.60711e-09	2051.51	0	8.54605e-10
1533_YLLQEPPRTV_2_run0	1/sp|Q96IZ0|PAWR_HUMAN	320482	3346.99	1.60711e-09	3346.99	0	1.61552e-10
3945_VPRVPTHTL_2_run0	1/sp|Q8IWZ3|ANKH1_HUMAN	110008	2248.12	1.60711e-09	2248.12	0	6.4255e-10
1005_NMYGKVVTV_2_run0	1/sp|O00267|SPT5H_HUMAN	158105	2893.54	1.60711e-09	2893.54	0	9.74642e-10
721_KLLEPVPVSV_2_run0	1/sp|Q86W34|AMZ2_HUMAN	268681	3998.75	1.60711e-09	3998.75	0	6.84391e-10
798_KLYDIDVAKV_2_run0	1/sp|P62750|RL23A_HUMAN	92243	3411.42	1.60711e-09	3411.42	0	5.0506e-10
1074_RLIPTLVSI_2_run0	1/sp|Q96P70|IPO9_HUMAN	177680	4900.81	1.60711e-09	4900.81	0	2.16539e-10
3795_TPKMPGQSV_2_run0	1/sp|Q8WYP5|ELYS_HUMAN	125666	1909.93	1.60711e-09	1909.93	0	5.71224e-10
2630_LPRETVAGAL_2_run0	1/sp|O95400|CD2B2_HUMAN	200071	2964.88	1.60711e-09	2964.88	0	4.51628e-10
2897_RPAPLVQQL_2_run0	1/sp|Q9Y6X9|MORC2_HUMAN	79777	3038.24	1.60711e-09	3038.24	0	7.80351e-10
1802_APNLGRSFHIL_2_run0	1/sp|Q96EE3|SEH1_HUMAN	104144	3927.97	1.60711e-09	3927.97	0	4.00126e-10
1520_YLLDLHSYL_2_run0	1/sp|O60337|MARH6_HUMAN	63051	5368.67	1.60711e-09	5368.67	0	3.03675e-10
3617_SPRLSSSL_2_run0	1/sp|O14974|MYPT1_HUMAN	178446	2126.49	1.60711e-09	2126.49	0	7.69797e-10
3877_VPASFRLQM_2_run0	1/sp|Q9BTE3|MCMBP_HUMAN	436994	3881.2	1.60711e-09	3881.2	0	9.28196e-10
3718_SPTLQRNAL_2_run0	1/sp|P54578|UBP14_HUMAN	148923	2162.71	1.60711e-09	2162.71	0	5.30241e-10
3664_SPRVVSTSL_2_run0	1/sp|Q9Y6D5|BIG2_HUMAN	181680	2315.53	1.60711e-09	2315.53	0	2.4965e-10
1949_APSEYRYTLL_2_run0	1/sp|Q9BS26|ERP44_HUMAN	170406	3778.46	1.60711e-09	3778.46	0	3.13265e-10
3521_SPNGTIRNIL_2_run0	2/sp|P48735|IDHP_HUMAN/sp|O75874|IDHC_HUMAN	203904	3297.45	1.60711e-09	3297.45	0	3.82943e-10
376_GIYDGILHSI_2_run0	1/sp|Q8N7X4|MAGB6_HUMAN	163828	4989.48	1.60711e-09	4989.48	0	5.33481e-10
3871_VARVPGSQL_2_run0	1/sp|O75151|PHF2_HUMAN	30389	2168.41	1.60711e-09	2168.41	0	9.97995e-10
2482_KPRSLQTGF_2_run0	1/sp|Q9H0Z9|RBM38_HUMAN	210055	1780.88	1.61085e-09	1780.88	0	1.08397e-09
84_ALNEEAGRLLL_2_run0	1/sp|Q16763|UBE2S_HUMAN	177828	4139.64	1.61085e-09	4139.64	0	1.10342e-09
3421_SPESVKATL_2_run0	1/sp|Q96JM3|CHAP1_HUMAN	57936	2071.37	1.62057e-09	2071.37	0	1.1078e-09
3440_SPGPEKMAL_2_run0	1/sp|O75995|SASH3_HUMAN	440939	2472.06	1.62547e-09	2472.06	0	1.10939e-09
416_GLIDVKPLGV_2_run0	1/sp|Q8WVY7|UBCP1_HUMAN	113872	4468.85	1.64453e-09	4468.85	0	1.13326e-09
1206_SLLDEFYKL_2_run0	1/sp|Q14444|CAPR1_HUMAN	55623	5783.72	1.64453e-09	5783.72	0	1.12553e-09
130_ALYDNVEKL_2_run0	1/sp|P08243|ASNS_HUMAN	78140	3453.94	1.64453e-09	3453.94	0	1.14627e-09
3852_TPSPARPAL_2_run0	1/sp|Q9H211|CDT1_HUMAN	397379	2111.71	1.64947e-09	2111.71	0	1.21284e-09
2729_MPRGMQGTSL_2_run0	1/sp|Q6UX01|LMBRL_HUMAN	58324	2509.65	1.64947e-09	2509.65	0	1.21569e-09
3784_TPHLRNLAV_2_run0	1/sp|Q5JS54|PSMG4_HUMAN	491366	2493.65	1.64947e-09	2493.65	0	1.2325e-09
414_GLIDRQVTV_2_run0	1/sp|Q9UPN3|MACF1_HUMAN	224890	3126.08	1.6679e-09	3126.08	0	1.28475e-09
1642_APAPAAQRL_2_run0	1/sp|Q99504|EYA3_HUMAN	647807	1698.7	1.6679e-09	1698.7	0	1.29834e-09
1121_RLVEIQYEL_2_run0	1/sp|Q14161|GIT2_HUMAN	93257	4203.44	1.6679e-09	4203.44	0	1.25297e-09
318_FLTKQEILL_2_run0	1/sp|Q99828|CIB1_HUMAN	248355	4327.43	1.6679e-09	4327.43	0	1.23428e-09
1521_YLLDQHILI_2_run0	1/sp|Q92835|SHIP1_HUMAN	73174	5014.41	1.6679e-09	5014.41	0	1.28714e-09
2173_HPESERISM_2_run0	1/sp|Q01082|SPTB2_HUMAN	52346	1589.73	1.6701e-09	1589.73	0	1.41475e-09
1780_APLLKRLSL_2_run0	1/sp|P54886|P5CS_HUMAN	90622	3578.88	1.6701e-09	3578.88	0	1.5065e-09
1576_YLYPDITRL_2_run0	1/sp|P31641|SC6A6_HUMAN	175528	4603.62	1.6701e-09	4603.62	0	1.30999e-09
850_KVWGNVVTV_2_run0	1/sp|O43390|HNRPR_HUMAN	246480	3483.53	1.6701e-09	3483.53	0	1.32234e-09
438_GLLPDVPSL_2_run0	1/sp|Q96N66|MBOA7_HUMAN	184861	5527.74	1.6701e-09	5527.74	0	1.48637e-09
2562_LPAPPHIDV_2_run0	1/sp|Q09161|NCBP1_HUMAN	103931	3774.54	1.67213e-09	3774.54	0	1.5157e-09
3625_SPRPALPAL_2_run0	1/sp|P05362|ICAM1_HUMAN	129324	3497.39	1.67213e-09	3497.39	0	1.61867e-09
500_GVLPNIQAV_2_run0	1/sp|Q96QV6|H2A1A_HUMAN	67945	4411.46	1.67213e-09	4411.46	0	1.58994e-09
256_FLLDKALLI_2_run0	1/sp|P15498|VAV_HUMAN	60153	5733.09	1.67213e-09	5733.09	0	1.63742e-09
3550_SPQGRVMTI_2_run0	1/sp|Q15365|PCBP1_HUMAN	363550	2430.56	1.67566e-09	2430.56	0	1.68594e-09
653_KLDQDLNEV_2_run0	1/sp|Q9UQE7|SMC3_HUMAN	149893	2446.67	1.67566e-09	2446.67	0	1.66713e-09
1962_APSLKQFSL_2_run0	1/sp|Q9UGJ1|GCP4_HUMAN	73767	4008.3	1.67566e-09	4008.3	0	1.67856e-09
195_FLAEDALNTV_2_run0	1/sp|Q08345|DDR1_HUMAN	47447	4432.87	1.68011e-09	4432.87	0	1.68977e-09
3544_SPQAPTLQV_2_run0	1/sp|Q12772|SRBP2_HUMAN	137169	3242.6	1.70104e-09	3242.6	0	1.69395e-09
1987_APSSPRPAL_2_run0	1/sp|P05362|ICAM1_HUMAN	562065	1927.76	1.70379e-09	1927.76	0	1.70936e-09
2207_HPRTSITVV_2_run0	1/sp|Q9NQT4|EXOS5_HUMAN	123974	1879.44	1.71576e-09	1879.44	0	1.71019e-09
3648_SPRSPSTTYL_2_run0	1/sp|Q13111|CAF1A_HUMAN	275688	2322.57	1.71966e-09	2322.57	0	1.71712e-09
391_GLDDIKDLKV_2_run0	1/sp|Q9HCE1|MOV10_HUMAN	53386	3692.83	1.74837e-09	3692.83	0	1.82494e-09
662_KLFDTQQFL_2_run0	1/sp|Q15306|IRF4_HUMAN	205907	4524.45	1.74837e-09	4524.45	0	1.75103e-09
838_KVIDEIYRV_2_run0	1/sp|Q9NVF7|FBX28_HUMAN	166422	3147.06	1.74837e-09	3147.06	0	1.83221e-09
292_FLNNQEYVL_2_run0	1/sp|Q01082|SPTB2_HUMAN	130484	4420.54	1.74837e-09	4420.54	0	1.78892e-09
2486_KPRSPVVEL_2_run0	1/sp|P25098|ARBK1_HUMAN	282101	2331.72	1.74837e-09	2331.72	0	1.7443e-09
2182_HPIYNIKSL_2_run0	1/sp|Q13601|KRR1_HUMAN	87806	2907.25	1.74837e-09	2907.25	0	1.73017e-09
2039_AVRKPAISL_2_run0	1/sp|Q5VSL9|STRP1_HUMAN	168757	2394.7	1.74837e-09	2394.7	0	1.76957e-09
3013_RPITERSLL_2_run0	1/sp|Q9UHY8|FEZ2_HUMAN	41998	2478.11	1.75644e-09	2478.11	0	1.83816e-09
3703_SPSTNRGPIQM_2_run0	1/sp|Q6VMQ6|MCAF1_HUMAN	45138	2278.13	1.77573e-09	2278.13	0	1.85571e-09
796_KLYAGAILEV_2_run0	1/sp|O60613|SEP15_HUMAN	163783	4307.42	1.78392e-09	4307.42	0	1.86094e-09
1534_YLLQRAVEV_2_run0	1/sp|Q13395|TARB1_HUMAN	160047	3640.93	1.78392e-09	3640.93	0	1.86795e-09
2247_IPKQVSISF_2_run0	1/sp|Q96D46|NMD3_HUMAN	105339	3762.99	1.78981e-09	3762.99	0	1.88029e-09
1166_SLADLQNDEV_2_run0	1/sp|P61247|RS3A_HUMAN	81128	3416.52	1.79175e-09	3416.52	0	1.89563e-09
3539_SPNTDREVL_2_run0	1/sp|Q14999|CUL7_HUMAN	201262	1805.5	1.79676e-09	1805.5	0	1.97269e-09
3766_TPAPPTHAL_2_run0	1/sp|Q5SXM2|SNPC4_HUMAN	520950	2160.12	1.79676e-09	2160.12	0	1.97166e-09
651_KLAENIDAQL_2_run0	1/sp|P37198|NUP62_HUMAN	287510	3146.25	1.79676e-09	3146.25	0	1.97269e-09
2684_LPSTRLGTL_2_run0	1/sp|Q7KZF4|SND1_HUMAN	209584	3268.29	1.79676e-09	3268.29	0	1.92545e-09
3719_SPTLRQLDL_2_run0	1/sp|P59045|NAL11_HUMAN	89831	3710	1.79676e-09	3710	0	2.02104e-09
1615_AIRNAMGSL_2_run0	1/sp|P55036|PSMD4_HUMAN	805454	2573.04	1.79676e-09	2573.04	0	2.03477e-09
1440_VMFGGKQVVV_2_run0	1/sp|O43865|SAHH2_HUMAN	185768	3670.65	1.79679e-09	3670.65	0	2.09081e-09
3115_RPQASALEL_2_run0	1/sp|P36956|SRBP1_HUMAN	270558	2802.1	1.8045e-09	2802.1	0	2.09541e-09
3519_SPNAIFKAL_2_run0	1/sp|P48436|SOX9_HUMAN	68440	4035.86	1.80708e-09	4035.86	0	2.18955e-09
3920_VPRIQPQSL_2_run0	1/sp|Q9NVR5|KTU_HUMAN	749177	2972.31	1.80708e-09	2972.31	0	2.21296e-09
2572_LPDERTISL_2_run0	1/sp|Q05048|CSTF1_HUMAN	835289	3457.12	1.80708e-09	3457.12	0	2.10672e-09
642_KLADDVDLEQV_2_run0	1/sp|P55072|TERA_HUMAN	110074	3456.89	1.80708e-09	3456.89	0	2.21843e-09
2517_KPTHVVVTL_2_run0	1/sp|Q14690|RRP5_HUMAN	235023	2377.86	1.80708e-09	2377.86	0	2.19829e-09
789_KLWEMDNM(UniMod:35)LI_2_run0	1/sp|Q9Y605|MOFA1_HUMAN	99471	4741	1.81257e-09	4741	0	2.26538e-09
759_KLQELENRL_2_run0	1/sp|Q8WXH0|SYNE2_HUMAN	66665	2571.28	1.81257e-09	2571.28	0	2.25908e-09
1105_RLQDELVTL_2_run0	1/sp|Q9UPN3|MACF1_HUMAN	287905	3976.05	1.81942e-09	3976.05	0	2.26783e-09
2180_HPINPRVAL_2_run0	1/sp|Q9P0U4|CXXC1_HUMAN	208017	2421.3	1.82423e-09	2421.3	0	2.27034e-09
1906_APRQPGLM(UniMod:35)AQM_2_run0	1/sp|Q9Y6H1|CHCH2_HUMAN	122136	2273.17	1.82826e-09	2273.17	0	2.2758e-09
2276_IPRPVDGVEV_2_run0	1/sp|P26368|U2AF2_HUMAN	637362	3124.94	1.82826e-09	3124.94	0	2.32677e-09
950_LM(UniMod:35)ISRTPEV_2_run0	4/sp|P01861|IGHG4_HUMAN/sp|P01860|IGHG3_HUMAN/sp|P01859|IGHG2_HUMAN/sp|P01857|IGHG1_HUMAN	325420	2815.05	1.82826e-09	2815.05	0	2.33899e-09
1903_APRPYASSL_2_run0	1/sp|Q96EP0|RNF31_HUMAN	160992	2175.55	1.82826e-09	2175.55	0	2.38393e-09
586_ILQNKIDLV_2_run0	1/sp|P41091|IF2G_HUMAN	213632	3610.53	1.82826e-09	3610.53	0	2.28772e-09
3288_RPWSNSRGL_2_run0	1/sp|Q9NRR8|C42S1_HUMAN	132906	1780.35	1.82826e-09	1780.35	0	2.33975e-09
2739_MPRQLSAAAAL_2_run0	1/sp|Q9UQV4|LAMP3_HUMAN	147654	3376.35	1.82826e-09	3376.35	0	2.3313e-09
2550_LARPASAAL_2_run0	1/sp|P40926|MDHM_HUMAN	578220	2151.19	1.82921e-09	2151.19	0	2.42557e-09
2283_IPRVPSLSV_2_run0	1/sp|P78345|RPP38_HUMAN	106235	3899.56	1.83519e-09	3899.56	0	2.4519e-09
854_LALNEDLRSWTA_2_run0	39/sp|P01893|HLAH_HUMAN/sp|Q29865|1C18_HUMAN/sp|Q95604|1C17_HUMAN/sp|Q07000|1C15_HUMAN/sp|P30510|1C14_HUMAN/sp|P30505|1C08_HUMAN/sp|P30508|1C12_HUMAN/sp|P10321|1C07_HUMAN/sp|Q29963|1C06_HUMAN/sp|Q9TNN7|1C05_HUMAN/sp|P30504|1C04_HUMAN/sp|P04222|1C03_HUMAN/sp|P30501|1C02_HUMAN/sp|P30499|1C01_HUMAN/sp|Q31610|1B81_HUMAN/sp|Q31612|1B73_HUMAN/sp|P30486|1B48_HUMAN/sp|P30480|1B42_HUMAN/sp|P30479|1B41_HUM…	155362	4415.23	1.83541e-09	4415.23	0	2.4745e-09
1022_QLMREVLLL_2_run0	1/sp|Q8TDB6|DTX3L_HUMAN	44622	5032.79	1.83608e-09	5032.79	0	2.48887e-09
1807_APNSRPALL_2_run0	1/sp|P55011|S12A2_HUMAN	136754	2430.92	1.8375e-09	2430.92	0	2.51104e-09
691_KLIEKLDIKL_3_run0	1/sp|P13639|EF2_HUMAN	43850	3735.33	1.85805e-09	3735.33	0	2.51291e-09
3802_TPMATRLLL_2_run0	1/sp|Q8WUM0|NU133_HUMAN	93784	4137.43	1.85805e-09	4137.43	0	2.52243e-09
331_FLYAGHIFL_2_run0	1/sp|Q66K64|DCA15_HUMAN	191341	5230.8	1.86131e-09	5230.8	0	2.52454e-09
1954_APSGTRVVQVL_2_run0	1/sp|Q9UN70|PCDGK_HUMAN	302300	3035.54	1.8618e-09	3035.54	0	2.57952e-09
2493_KPRVTPVEV_2_run0	1/sp|Q8N7H5|PAF1_HUMAN	148563	1878.27	1.86625e-09	1878.27	0	2.59707e-09
3557_SPQLGRAVQLL_2_run0	1/sp|Q8N2A8|PLD6_HUMAN	71184	4107.1	1.87391e-09	4107.1	0	2.62769e-09
288_FLNGEVIRL_2_run0	1/sp|Q99714|HCD2_HUMAN	115495	4531.42	1.8786e-09	4531.42	0	2.64553e-09
896_LLLDMQNRL_2_run0	1/sp|Q16531|DDB1_HUMAN	169762	4315.61	1.8786e-09	4315.61	0	2.68159e-09
3507_SPMKEKGNIQL_2_run0	1/sp|P11717|MPRI_HUMAN	24557	2166.97	1.88019e-09	2166.97	0	2.6888e-09
3377_SPANTRYLFL_2_run0	1/sp|Q08209|PP2BA_HUMAN	98342	4369.87	1.88019e-09	4369.87	0	2.68997e-09
2594_LPKPPGRGV_2_run0	1/sp|Q8N531|FBXL6_HUMAN	363990	1800.68	1.88339e-09	1800.68	0	2.6978e-09
1244_SLSFMNPRL_2_run0	1/sp|Q9Y2T2|AP3M1_HUMAN	69546	4285.24	1.89162e-09	4285.24	0	2.70473e-09
3730_SPVLSLSSL_2_run0	1/sp|O15533|TPSN_HUMAN	60308	4932.39	1.89527e-09	4932.39	0	2.71272e-09
463_GLVASLISV_2_run0	1/sp|O95347|SMC2_HUMAN	69683	5283.4	1.89991e-09	5283.4	0	2.73238e-09
1649_APAPIHNQF_2_run0	1/sp|Q15011|HERP1_HUMAN	517350	2284.07	1.89991e-09	2284.07	0	2.71382e-09
3716_SPTIGKQL_2_run0	1/sp|P42285|SK2L2_HUMAN	45856	2028.53	1.89991e-09	2028.53	0	2.77076e-09
543_ILDPHVVLL_2_run0	1/sp|Q99567|NUP88_HUMAN	144951	4812.54	1.89991e-09	4812.54	0	2.75892e-09
1946_APSDNRVTSF_2_run0	1/sp|Q9UNZ2|NSF1C_HUMAN	84783	2152.78	1.90029e-09	2152.78	0	2.79831e-09
3060_RPKYQFLSL_2_run0	1/sp|O60443|DFNA5_HUMAN	36057	3873.3	1.90029e-09	3873.3	0	2.83961e-09
3375_SPANPAHIL_2_run0	1/sp|Q9H967|WDR76_HUMAN	132399	2664.54	1.90029e-09	2664.54	0	2.80397e-09
188_FIYHGEVPQA_2_run0	1/sp|P33076|C2TA_HUMAN	334197	3064.78	1.90029e-09	3064.78	0	2.77829e-09
1891_APRPFPEVSL_2_run0	1/sp|Q96KV7|WDR90_HUMAN	127160	4222.5	1.90029e-09	4222.5	0	2.80144e-09
1588_YQVGQLYSV_2_run0	1/sp|Q00169|PIPNA_HUMAN	72144	3973.67	1.90163e-09	3973.67	0	2.86422e-09
373_GILPMVPEV_2_run0	1/sp|O95793|STAU1_HUMAN	69547	5608.01	1.90363e-09	5608.01	0	2.87784e-09
2153_GPRPITQSEL_2_run0	1/sp|Q96S82|UBL7_HUMAN	418206	2367.11	1.90571e-09	2367.11	0	2.87837e-09
205_FLDESRSTQYM_2_run0	1/sp|Q9Y230|RUVB2_HUMAN	45143	3124.8	1.90571e-09	3124.8	0	2.8886e-09
1082_RLLDYVATV_2_run0	1/sp|Q9NR09|BIRC6_HUMAN	118590	4060.42	1.90738e-09	4060.42	0	2.91608e-09
3547_SPQDSRLYL_2_run0	1/sp|Q9HA65|TBC17_HUMAN	134844	2996.28	1.90738e-09	2996.28	0	2.97943e-09
746_KLMQQQQEV_2_run0	1/sp|O15164|TIF1A_HUMAN	25372	1676.93	1.90817e-09	1676.93	0	3.07671e-09
702_KLIQNVFEI_2_run0	1/sp|O00471|EXOC5_HUMAN	236988	4719.7	1.91193e-09	4719.7	0	3.17386e-09
1462_YAYDGKDYIA_2_run0	1/sp|P30447|1A23_HUMAN	44932	2843.82	1.91528e-09	2843.82	0	3.19925e-09
3843_TPSDGRPEL_2_run0	1/sp|Q15642|CIP4_HUMAN	266363	1849.49	1.91852e-09	1849.49	0	3.20685e-09
1657_APAPRPSLL_2_run0	1/sp|Q92620|PRP16_HUMAN	884941	2793.97	1.92097e-09	2793.97	0	3.35031e-09
678_KLHYVVTEV_2_run0	1/sp|Q9Y4A5|TRRAP_HUMAN	85063	2624.82	1.92097e-09	2624.82	0	3.31098e-09
2358_KPGPVGPEL_2_run0	1/sp|O95817|BAG3_HUMAN	152723	2391.87	1.92097e-09	2391.87	0	3.23015e-09
2529_KPVYPGQTL_2_run0	1/sp|P51659|DHB4_HUMAN	596569	2418.8	1.92097e-09	2418.8	0	3.34153e-09
3067_RPLLKAITA_2_run0	1/sp|Q96GQ7|DDX27_HUMAN	157837	2484.6	1.92524e-09	2484.6	0	3.3921e-09
498_GTFIIDPGGVIR_2_run0	1/iRT|iRT_Biognosys|iRT_Biognosys	446351	4585.66	1.92963e-09	4585.66	0	3.41435e-09
35_ALFEGKVQL_2_run0	1/sp|Q8NEZ3|WDR19_HUMAN	113919	4041.91	1.93295e-09	4041.91	0	3.48735e-09
2317_KIRPHIATL_2_run0	1/sp|Q14671|PUM1_HUMAN	75719	1882.54	1.93295e-09	1882.54	0	3.51571e-09
67_ALLKIEGVYA_2_run0	1/sp|P18077|RL35A_HUMAN	59536	4125.14	1.93295e-09	4125.14	0	3.49619e-09
199_FLANIGTSV_2_run0	1/sp|Q9UKG1|DP13A_HUMAN	82100	4089.94	1.93295e-09	4089.94	0	3.52098e-09
3420_SPESLRSKV_2_run0	1/sp|Q9H361|PABP3_HUMAN	63833	1527.41	1.93295e-09	1527.41	0	3.58763e-09
1958_APSKSRLLATL_2_run0	2/sp|P0C0L5|CO4B_HUMAN/sp|P0C0L4|CO4A_HUMAN	93864	2963.79	1.93295e-09	2963.79	0	3.46334e-09
3845_TPSEPHPVL_2_run0	1/sp|Q9Y5A9|YTHD2_HUMAN	609266	2455.81	1.94048e-09	2455.81	0	3.64389e-09
1565_YLTHDSPSV_2_run0	1/sp|P09234|RU1C_HUMAN	165282	2041.64	1.9415e-09	2041.64	0	3.65312e-09
843_KVLEPSETLVV_2_run0	1/sp|P18583|SON_HUMAN	128752	3674.28	1.94691e-09	3674.28	0	3.68223e-09
2387_KPKFILSVL_2_run0	1/sp|Q9BVK2|ALG8_HUMAN	116451	4438.52	1.94691e-09	4438.52	0	3.68237e-09
1715_APFQGDQRSL_2_run0	1/sp|Q00978|IRF9_HUMAN	106156	2342.59	1.94691e-09	2342.59	0	3.72802e-09
262_FLLEKPFSV_2_run0	1/sp|O60678|ANM3_HUMAN	247094	4815.88	1.94691e-09	4815.88	0	3.73884e-09
845_KVLEYVIKV_2_run0	1/sp|P43355|MAGA1_HUMAN	216550	3592.75	1.94691e-09	3592.75	0	3.77167e-09
1292_TLISRLPAV_2_run0	1/sp|P18754|RCC1_HUMAN	89365	3997.65	1.94763e-09	3997.65	0	3.79013e-09
2992_RPHTVLTVI_2_run0	1/sp|Q12788|TBL3_HUMAN	128072	3015.71	1.94937e-09	3015.71	0	3.79931e-09
3818_TPRDLVLRSL_2_run0	1/sp|B0I1T2|MYO1G_HUMAN	77818	3528.41	1.94937e-09	3528.41	0	3.83333e-09
3954_VPVAKTAEL_2_run0	1/sp|P49790|NU153_HUMAN	180035	2252.71	1.94937e-09	2252.71	0	3.80466e-09
309_FLSELTQQL_2_run0	1/sp|P14174|MIF_HUMAN	260727	4748.96	1.9546e-09	4748.96	0	3.83648e-09
757_KLQEFLQTL_2_run0	1/sp|Q9NVI1|FANCI_HUMAN	183969	4509.45	1.95648e-09	4509.45	0	3.84922e-09
1132_RLYPEGLAQL_2_run0	1/sp|P61421|VA0D1_HUMAN	74765	4102.81	1.95648e-09	4102.81	0	3.90896e-09
3439_SPGLRDVAL_2_run0	1/sp|Q13233|M3K1_HUMAN	252450	3202.3	1.95648e-09	3202.3	0	4.07891e-09
2892_RPAPHPLFL_2_run0	1/sp|Q96C12|ARMC5_HUMAN	163106	3265.94	1.95648e-09	3265.94	0	3.98974e-09
3746_SPYQNIKIL_2_run0	1/sp|P52788|SPSY_HUMAN	164927	3787.48	1.95648e-09	3787.48	0	3.97807e-09
626_KIIEYSVYL_2_run0	1/sp|P51610|HCFC1_HUMAN	72622	4331.09	1.95648e-09	4331.09	0	3.90247e-09
3503_SPMADRSMM(UniMod:35)_2_run0	1/sp|P18583|SON_HUMAN	135328	1428.89	1.95648e-09	1428.89	0	3.91562e-09
2638_LPRGSRAHITL_3_run0	1/sp|P09543|CN37_HUMAN	189440	2047.02	1.95648e-09	2047.02	0	3.94682e-09
3602_SPRIYSNSL_2_run0	1/sp|Q9Y2U8|MAN1_HUMAN	257460	2459.78	1.95648e-09	2459.78	0	4.015e-09
2037_AVREAIHAL_2_run0	1/sp|Q9Y4R8|TELO2_HUMAN	174202	2118.15	1.95648e-09	2118.15	0	4.08388e-09
278_FLLPSEVPAL_2_run0	1/sp|Q86VV8|RTTN_HUMAN	38706	5813.89	1.95932e-09	5813.89	0	4.09748e-09
3490_SPLGHRMQL_2_run0	1/sp|Q8WUA4|TF3C2_HUMAN	230398	2381.64	1.96484e-09	2381.64	0	4.11696e-09
1157_SILEHQIQV_2_run0	1/sp|P33991|MCM4_HUMAN	186833	3412.92	1.96484e-09	3412.92	0	4.13507e-09
1218_SLLGGDVVSV_2_run0	1/sp|Q99576|T22D3_HUMAN	151442	4474.06	1.96484e-09	4474.06	0	4.10475e-09
118_ALVDQRELYL_2_run0	1/sp|Q9UL33|TPC2L_HUMAN	79741	4137.31	1.96484e-09	4137.31	0	4.17929e-09
105_ALSNLEVKL_2_run0	1/sp|Q86UX7|URP2_HUMAN	201807	3945.25	1.96484e-09	3945.25	0	4.11021e-09
2079_FPRLLDTKL_2_run0	1/sp|O95453|PARN_HUMAN	131171	4109.34	1.96761e-09	4109.34	0	4.21913e-09
1229_SLLRSIFTV_2_run0	1/sp|Q92830|KAT2A_HUMAN	94941	5203.55	1.97034e-09	5203.55	0	4.23573e-09
1134_RLYQGINQL_2_run0	1/sp|P43246|MSH2_HUMAN	192989	3152.32	1.97495e-09	3152.32	0	4.25257e-09
3938_VPRQPTVTSV_2_run0	1/sp|Q96HC4|PDLI5_HUMAN	170858	2213.35	1.98961e-09	2213.35	0	4.25628e-09
1107_RLQEDPPAGV_2_run0	1/sp|P49459|UBE2A_HUMAN	1012920	2157.19	1.99293e-09	2157.19	0	4.30292e-09
114_ALTSVVVTL_2_run0	1/sp|Q00534|CDK6_HUMAN	32861	4761.26	1.99711e-09	4761.26	0	4.35144e-09
1726_APGPPGRSML_2_run0	1/sp|Q8IY67|RAVR1_HUMAN	818352	2492.2	2.00974e-09	2492.2	0	4.36204e-09
220_FLEKLLPPV_2_run0	1/sp|O95372|LYPA2_HUMAN	461346	4996.57	2.01699e-09	4996.57	0	4.44326e-09
125_ALWDIETGQQTV_2_run0	1/sp|P62879|GBB2_HUMAN	100962	4712.84	2.01699e-09	4712.84	0	4.43446e-09
2619_LPQGIVREL_2_run0	1/sp|P63272|SPT4H_HUMAN	242260	3715.08	2.01744e-09	3715.08	0	4.45638e-09
3728_SPVFRLETL_2_run0	1/sp|Q9Y5S1|TRPV2_HUMAN	520696	4404.3	2.02026e-09	4404.3	0	4.46239e-09
1204_SLITRLLEV_2_run0	1/sp|P62140|PP1B_HUMAN	157285	5680.26	2.03058e-09	5680.26	0	4.49032e-09
53_ALITRIFGV_2_run0	1/sp|Q6YHU6|THADA_HUMAN	74990	5053.4	2.03058e-09	5053.4	0	4.49578e-09
1078_RLLDLENIQI_2_run0	1/sp|Q92556|ELMO1_HUMAN	67178	5221.73	2.03681e-09	5221.73	0	4.56786e-09
320_FLVEHNLVL_2_run0	1/sp|Q9Y4C1|KDM3A_HUMAN	115806	4524.68	2.03681e-09	4524.68	0	4.55831e-09
3499_SPLRSSSAL_2_run0	1/sp|P59923|ZN445_HUMAN	433062	1865.86	2.03681e-09	1865.86	0	4.52605e-09
1340_VEATFGVDESNAK_2_run0	1/iRT|iRT_Biognosys|iRT_Biognosys	319101	2427.73	2.03874e-09	2427.73	0	4.58361e-09
3934_VPRPTSTVGL_2_run0	1/sp|Q9BSJ1|TRI51_HUMAN	601285	2673.05	2.04828e-09	2673.05	0	4.58702e-09
3775_TPDAMKAAMAL_2_run0	1/sp|P02792|FRIL_HUMAN	39296	3773.37	2.05181e-09	3773.37	0	4.60942e-09
95_ALQEKLWNV_2_run0	1/sp|Q96HW7|INT4_HUMAN	107892	3879.17	2.06059e-09	3879.17	0	4.62207e-09
418_GLIEKNIEL_2_run0	1/sp|P26358|DNMT1_HUMAN	472887	3777.79	2.06183e-09	3777.79	0	4.63775e-09
3083_RPMQQVDTL_2_run0	1/sp|Q6PIJ6|FBX38_HUMAN	144518	2333.81	2.06962e-09	2333.81	0	4.67536e-09
2008_APVERAQL_2_run0	1/sp|Q9HBH1|DEFM_HUMAN	98629	1798.73	2.07051e-09	1798.73	0	4.6881e-09
2269_IPRGVNVSAL_2_run0	1/sp|P38606|VATA_HUMAN	383737	3282.53	2.07051e-09	3282.53	0	4.70692e-09
1361_VLFHNLPSL_2_run0	1/sp|P19397|CD53_HUMAN	152510	4692.77	2.0706e-09	4692.77	0	4.7437e-09
608_ILYPKTLFL_2_run0	1/sp|Q08209|PP2BA_HUMAN	70151	5224.92	2.07975e-09	5224.92	0	4.78677e-09
481_GLYEGLDWLA_2_run0	1/sp|P61204|ARF3_HUMAN	28190	5923	2.09111e-09	5923	0	4.80142e-09
1103_RLPEIYIQL_2_run0	1/sp|Q9H223|EHD4_HUMAN	79822	5183.42	2.09111e-09	5183.42	0	4.79161e-09
1897_APRPPQDLIGL_2_run0	1/sp|Q92797|SYMPK_HUMAN	225093	4095.94	2.09111e-09	4095.94	0	4.8214e-09
3692_SPSNTRYLFL_2_run0	1/sp|P48454|PP2BC_HUMAN	130519	4285.77	2.09111e-09	4285.77	0	4.80845e-09
3548_SPQEARNML_2_run0	1/sp|P33240|CSTF2_HUMAN	623331	2086.58	2.09437e-09	2086.58	0	4.85063e-09
1942_APSAAKLLVQL_2_run0	1/sp|Q15751|HERC1_HUMAN	22456	4533.99	2.09518e-09	4533.99	0	4.8833e-09
1809_APNYRLKSL_2_run0	1/sp|Q9HBM6|TAF9B_HUMAN	243716	2339.38	2.09706e-09	2339.38	0	4.94129e-09
1264_SMYDKVLML_2_run0	1/sp|Q9Y5Q8|TF3C5_HUMAN	55699	4689.43	2.09903e-09	4689.43	0	4.96558e-09
1307_TLNDREYQL_2_run0	1/sp|P27708|PYR1_HUMAN	191776	2774.05	2.10514e-09	2774.05	0	5.03343e-09
1117_RLSEVQASL_2_run0	1/sp|Q9NXW2|DJB12_HUMAN	405405	2629.31	2.10514e-09	2629.31	0	5.04347e-09
1059_RLFSSIVTV_2_run0	1/sp|Q9NX74|DUS2L_HUMAN	359567	4312.87	2.11341e-09	4312.87	0	5.09188e-09
3838_TPRSYVGVTL_2_run0	1/sp|Q92535|PIGC_HUMAN	412111	3410.92	2.12254e-09	3410.92	0	5.11801e-09
2642_LPRKHIQGL_2_run0	1/sp|P41214|EIF2D_HUMAN	76004	1546.21	2.13173e-09	1546.21	0	5.13154e-09
3777_TPDTGRILSKL_2_run0	2/sp|P55036|PSMD4_HUMAN/sp|A2A3N6|PIPSL_HUMAN	610256	3306.25	2.13631e-09	3306.25	0	5.15998e-09
2374_KPILSTRSL_2_run0	1/sp|O95456|PSMG1_HUMAN	346425	2384.4	2.1413e-09	2384.4	0	5.19273e-09
2645_LPRLAGSLL_2_run0	1/sp|Q13724|MOGS_HUMAN	51582	4402.76	2.1413e-09	4402.76	0	5.16611e-09
115_ALVDHVAEL_2_run0	1/sp|B0I1T2|MYO1G_HUMAN	522412	3453.78	2.14333e-09	3453.78	0	5.23411e-09
3771_TPAVGRLEV_2_run0	1/sp|Q53HL2|BOREA_HUMAN	1724920	3008.83	2.14333e-09	3008.83	0	5.21737e-09
511_HLLPTAPTTV_2_run0	1/sp|Q6VMQ6|MCAF1_HUMAN	149644	3335.87	2.14333e-09	3335.87	0	5.19886e-09
3753_SVRPLVTEL_2_run0	1/sp|P57740|NU107_HUMAN	355482	3597.44	2.14695e-09	3597.44	0	5.23638e-09
2343_KPATSYVRTTI_3_run0	1/sp|P46779|RL28_HUMAN	49434	2296.38	2.15112e-09	2296.38	0	5.25686e-09
788_KLWEMDNM(UniMod:35)L_2_run0	1/sp|Q9Y605|MOFA1_HUMAN	72459	4010.13	2.15386e-09	4010.13	0	5.2702e-09
3870_VARPLSTAL_2_run0	1/sp|O14561|ACPM_HUMAN	441865	2705.25	2.16264e-09	2705.25	0	5.31096e-09
2029_APYRTQSSASL_2_run0	1/sp|Q96PK6|RBM14_HUMAN	18664	1845.8	2.1673e-09	1845.8	0	5.31303e-09
204_FLDEPTNHL_2_run0	1/sp|Q9UG63|ABCF2_HUMAN	161125	3160.72	2.17688e-09	3160.72	0	5.34933e-09
3970_YLRPPNTSL_2_run0	1/sp|O75494|SRS10_HUMAN	268011	2940.28	2.18125e-09	2940.28	0	5.35835e-09
2212_HPVQPWASL_2_run0	1/sp|Q8NDX1|PSD4_HUMAN	116717	3837.34	2.18158e-09	3837.34	0	5.38022e-09
486_GLYPNLIQV_2_run0	1/sp|Q7L2E3|DHX30_HUMAN	134292	5149.42	2.19511e-09	5149.42	0	5.38119e-09
1371_VLIEGSINSV_2_run0	1/sp|P59998|ARPC4_HUMAN	64781	3828.61	2.21386e-09	3828.61	0	5.47651e-09
122_ALVSSLHLL_2_run0	1/sp|Q9Y678|COPG1_HUMAN	89120	4717.66	2.21386e-09	4717.66	0	5.47389e-09
2199_HPRIASGLGL_2_run0	1/sp|O14880|MGST3_HUMAN	247030	2758.98	2.21386e-09	2758.98	0	5.49888e-09
810_KLYQRDLEV_2_run0	1/sp|Q96B01|R51A1_HUMAN	57001	2373.35	2.21386e-09	2373.35	0	5.40698e-09
2341_KPASVFVQL_2_run0	1/sp|P19838|NFKB1_HUMAN	555919	3850.15	2.21386e-09	3850.15	0	5.44215e-09
3535_SPNSAHAVSL_2_run0	1/sp|O14511|NRG2_HUMAN	84630	1950.87	2.21386e-09	1950.87	0	5.51866e-09
441_GLMDDVDFKA_2_run0	1/sp|Q9Y4L1|HYOU1_HUMAN	38566	4107.76	2.22549e-09	4107.76	0	5.54259e-09
737_KLLTEVHAA_2_run0	1/sp|P78325|ADAM8_HUMAN	58488	1887.03	2.22692e-09	1887.03	0	5.55993e-09
3833_TPRPTAAEL_2_run0	1/sp|Q9BSJ8|ESYT1_HUMAN	772329	2113.93	2.22694e-09	2113.93	0	5.56661e-09
1604_AARAPPQAL_2_run0	1/sp|Q9BTV7|CABL2_HUMAN	118188	1736.83	2.22895e-09	1736.83	0	5.60356e-09
2_AALPNVYEV_2_run0	1/sp|P33992|MCM5_HUMAN	199860	4086.74	2.22895e-09	4086.74	0	5.64138e-09
3113_RPQAPATVGL_2_run0	1/sp|Q15370|ELOB_HUMAN	452016	2520.65	2.22895e-09	2520.65	0	5.66879e-09
1494_YLFERIKEL_2_run0	1/sp|Q96SK2|TM209_HUMAN	71076	4084.22	2.22895e-09	4084.22	0	5.67856e-09
1399_VLMEMSYRL_2_run0	1/sp|Q6PCD5|RFWD3_HUMAN	59125	4348.2	2.23242e-09	4348.2	0	5.6818e-09
471_GLWEEAYRV_2_run0	1/sp|Q9UG01|IF172_HUMAN	60335	4098.22	2.23659e-09	4098.22	0	5.68258e-09
1256_SLYGGTITI_2_run0	1/sp|Q5VTR2|BRE1A_HUMAN	116430	4419.8	2.24583e-09	4419.8	0	5.70998e-09
3889_VPESHRKPL_2_run0	1/sp|Q01850|CDR2_HUMAN	23344	804.529	2.24583e-09	804.529	0	5.71374e-09
3641_SPRQLFSAL_2_run0	1/sp|Q9NTJ4|MA2C1_HUMAN	410063	4058.75	2.24882e-09	4058.75	0	5.76816e-09
1820_APRAALTRL_2_run0	1/sp|P83436|COG7_HUMAN	97975	2039.31	2.25388e-09	2039.31	0	5.77435e-09
221_FLFDGSPTYV_2_run0	1/sp|P49327|FAS_HUMAN	95752	5218.67	2.26107e-09	5218.67	0	5.84951e-09
1213_SLLEKSLGL_2_run0	1/sp|O43324|MCA3_HUMAN	168270	4191.89	2.26407e-09	4191.89	0	5.91256e-09
408_GLIDEIYGI_2_run0	1/sp|Q96AX1|VP33A_HUMAN	90800	5636.71	2.26407e-09	5636.71	0	5.92285e-09
1367_VLIANLEKL_2_run0	1/sp|Q6WRX3|ZY11A_HUMAN	48304	4467.89	2.26407e-09	4467.89	0	5.92675e-09
3368_SPALKRLDL_2_run0	1/sp|Q8WTW3|COG1_HUMAN	259292	2862.52	2.26571e-09	2862.52	0	5.94596e-09
499_GVIDGHIYAV_2_run0	1/sp|Q14145|KEAP1_HUMAN	254313	3573.77	2.2689e-09	3573.77	0	5.96376e-09
2698_LVRDVVSSL_2_run0	1/sp|Q9NQ55|SSF1_HUMAN	1403800	3339.9	2.27083e-09	3339.9	0	6.08227e-09
837_KVFDPVPVGV_2_run0	1/sp|Q08211|DHX9_HUMAN	233244	3983.25	2.27083e-09	3983.25	0	6.08091e-09
3162_RPRETRVIAVL_3_run0	1/sp|P33076|C2TA_HUMAN	139850	2484.16	2.27083e-09	2484.16	0	6.09277e-09
1109_RLQEEINEV_2_run0	1/sp|Q70UQ0|IKIP_HUMAN	166493	2514.83	2.27083e-09	2514.83	0	6.1009e-09
375_GIM(UniMod:35)KKAYEL_2_run0	1/sp|P11831|SRF_HUMAN	56000	1955.59	2.2756e-09	1955.59	0	6.10546e-09
2876_RPAGLSPTL_2_run0	1/sp|Q14135|VGLL4_HUMAN	608098	2616.48	2.28018e-09	2616.48	0	6.11901e-09
2295_IPYGERITL_2_run0	1/sp|P49750|YLPM1_HUMAN	223758	3716.22	2.28292e-09	3716.22	0	6.14754e-09
1637_APALPGPAL_2_run0	1/sp|O00303|EIF3F_HUMAN	122337	3866.21	2.29049e-09	3866.21	0	6.17611e-09
1230_SLLSHVEQL_2_run0	1/sp|Q9UI95|MD2L2_HUMAN	123953	4082.23	2.29256e-09	4082.23	0	6.21993e-09
58_ALLDRIVSV_2_run0	1/sp|Q92621|NU205_HUMAN	422386	4400.11	2.29707e-09	4400.11	0	6.30398e-09
97_ALQEMVHQV_2_run0	1/sp|Q14511|CASL_HUMAN	237288	2856.12	2.29707e-09	2856.12	0	6.31839e-09
18_ALAGHQDGITFI_2_run0	1/sp|Q8TEB1|DCA11_HUMAN	147648	4058.91	2.29707e-09	4058.91	0	6.38912e-09
1635_APALARTLQSL_2_run0	1/sp|Q96HA7|TONSL_HUMAN	197153	4140.02	2.29707e-09	4140.02	0	6.39647e-09
2235_IPEEQRAQL_2_run0	1/sp|Q15149|PLEC_HUMAN	80825	2140.17	2.29707e-09	2140.17	0	6.31909e-09
2258_IPNFPRSTV_2_run0	1/sp|P00491|PNPH_HUMAN	258620	3165.37	2.30397e-09	3165.37	0	6.42407e-09
741_KLMDLDVEQL_2_run0	1/sp|P12004|PCNA_HUMAN	206825	4520.8	2.30406e-09	4520.8	0	6.4325e-09
2376_KPIQDVNSL_2_run0	1/sp|Q9Y4C1|KDM3A_HUMAN	130050	2353.23	2.30406e-09	2353.23	0	6.43683e-09
497_GTFIIDPAAVIR_2_run0	1/iRT|iRT_Biognosys|iRT_Biognosys	322156	5192.62	2.30406e-09	5192.62	0	6.42698e-09
1055_RLFDQAFGL_2_run0	1/sp|P04792|HSPB1_HUMAN	188138	4821.98	2.30502e-09	4821.98	0	6.60723e-09
1354_VLDDKLVFV_2_run0	1/sp|Q4KMQ2|ANO6_HUMAN	265590	4561.06	2.30502e-09	4561.06	0	6.47747e-09
3090_RPNGRVALRTL_3_run0	1/sp|Q96HS1|PGAM5_HUMAN	26703	1878.42	2.30714e-09	1878.42	0	6.88857e-09
808_KLYPQLPAEI_2_run0	1/sp|Q9HCE0|EPG5_HUMAN	54594	4255.99	2.30714e-09	4255.99	0	6.63875e-09
822_KMLEKLPEL_2_run0	1/sp|Q9NUQ8|ABCF3_HUMAN	283917	3548.08	2.30714e-09	3548.08	0	6.83703e-09
1008_PLPVQVFNL_2_run0	1/sp|Q13098|CSN1_HUMAN	40320	5851.82	2.30714e-09	5851.82	0	6.64603e-09
2672_LPSKPSSTL_2_run0	1/sp|Q9UNF0|PACN2_HUMAN	713580	2093.15	2.31299e-09	2093.15	0	6.89036e-09
567_ILLRDLPTL_2_run0	1/sp|Q3ZCQ3|F174B_HUMAN	141044	4947.54	2.31301e-09	4947.54	0	6.90894e-09
2666_LPSATRALEL_2_run0	1/sp|P18583|SON_HUMAN	423048	3754.39	2.31301e-09	3754.39	0	7.0222e-09
2752_MPYSNGRPAL_2_run0	1/sp|Q16877|F264_HUMAN	175136	2710.2	2.31356e-09	2710.2	0	7.05002e-09
3075_RPLVSASAL_2_run0	1/sp|O95396|MOCS3_HUMAN	68886	2936.9	2.32232e-09	2936.9	0	7.08133e-09
3347_SPADRMLTV_2_run0	1/sp|Q9H6E5|STPAP_HUMAN	75426	3004.68	2.32686e-09	3004.68	0	7.18377e-09
1922_APRTFSNSL_2_run0	1/sp|Q99551|MTERF_HUMAN	107082	2368.53	2.33131e-09	2368.53	0	7.19992e-09
797_KLYDGFQYL_2_run0	1/sp|Q9UBF8|PI4KB_HUMAN	145013	4454.95	2.33131e-09	4454.95	0	7.30412e-09
1296_TLLEDGTFKV_2_run0	1/sp|Q9HBL8|NMRL1_HUMAN	99169	4142.92	2.33131e-09	4142.92	0	7.25149e-09
1144_RVLDPSMVILEV_2_run0	1/sp|Q9UJX6|ANC2_HUMAN	101408	5426.11	2.33131e-09	5426.11	0	7.30669e-09
2146_GPREAVSGL_2_run0	1/sp|Q9GZU3|TM39B_HUMAN	1010390	2087	2.33177e-09	2087	0	7.33249e-09
3985_YPLLKNISM_2_run0	1/sp|Q8NB66|UN13C_HUMAN	274812	4217.55	2.34393e-09	4217.55	0	7.34043e-09
1122_RLVPFLVEL_2_run0	1/sp|Q92508|PIEZ1_HUMAN	50452	5951.96	2.3443e-09	5951.96	0	7.38477e-09
1464_YAYDGKDYLA_2_run0	1/sp|P17693|HLAG_HUMAN	44784	2843.82	2.3443e-09	2843.82	0	7.38463e-09
2257_IPNERTMQL_2_run0	1/sp|Q8N1B4|VPS52_HUMAN	303350	2891.62	2.35051e-09	2891.62	0	7.39201e-09
3857_TPSRKGLVL_2_run0	1/sp|Q9H4L4|SENP3_HUMAN	140287	2021.31	2.35202e-09	2021.31	0	7.43676e-09
2598_LPKSPPYTAF_2_run0	1/sp|P23588|IF4B_HUMAN	258729	3562.24	2.35202e-09	3562.24	0	7.41565e-09
171_FIIEKQPPQV_2_run0	2/sp|P51692|STA5B_HUMAN/sp|P42229|STA5A_HUMAN	142469	3329.78	2.35309e-09	3329.78	0	7.43915e-09
1956_APSKPAASI_2_run0	1/sp|O60264|SMCA5_HUMAN	151407	1553.58	2.36405e-09	1553.58	0	7.45608e-09
811_KLYQTPLEL_2_run0	1/sp|P52948|NUP98_HUMAN	107794	4023.94	2.37051e-09	4023.94	0	7.48133e-09
2777_NPRDLPLMAL_2_run0	1/sp|P04818|TYSY_HUMAN	153061	4749.68	2.37878e-09	4749.68	0	7.49625e-09
1080_RLLDRKVLL_2_run0	1/sp|Q9H4A5|GLP3L_HUMAN	74332	2928.87	2.38119e-09	2928.87	0	7.49889e-09
3222_RPRWVVPVL_2_run0	1/sp|Q93008|USP9X_HUMAN	27627	4293.38	2.38671e-09	4293.38	0	7.50768e-09
3303_RPYSNVSNL_2_run0	1/sp|O95248|MTMR5_HUMAN	215465	2179.74	2.38907e-09	2179.74	0	7.50779e-09
3510_SPMPGTLTAL_2_run0	1/sp|O60671|RAD1_HUMAN	134090	4246.6	2.39979e-09	4246.6	0	7.57028e-09
1945_APSDLRTIQTF_2_run0	1/sp|Q9BUL5|PHF23_HUMAN	61910	3529.07	2.40482e-09	3529.07	0	7.58401e-09
521_IALNEDLRSWTA_2_run0	39/sp|P01893|HLAH_HUMAN/sp|P17693|HLAG_HUMAN/sp|Q29865|1C18_HUMAN/sp|Q95604|1C17_HUMAN/sp|Q07000|1C15_HUMAN/sp|P30510|1C14_HUMAN/sp|P30505|1C08_HUMAN/sp|P30508|1C12_HUMAN/sp|P10321|1C07_HUMAN/sp|Q29963|1C06_HUMAN/sp|Q9TNN7|1C05_HUMAN/sp|P30504|1C04_HUMAN/sp|P04222|1C03_HUMAN/sp|P30501|1C02_HUMAN/sp|P30499|1C01_HUMAN/sp|Q31610|1B81_HUMAN/sp|Q31612|1B73_HUMAN/sp|P30486|1B48_HUMAN/sp|P30480|1B42_HUM…	138902	4415.23	2.40646e-09	4415.23	0	7.59084e-09
3064_RPLGKAASL_2_run0	1/sp|Q04637|IF4G1_HUMAN	115586	1508.98	2.4202e-09	1508.98	0	7.60792e-09
1545_YLPPATQVV_2_run0	1/sp|P38919|IF4A3_HUMAN	160876	3521	2.42367e-09	3521	0	7.70757e-09
1305_TLMDILPRI_2_run0	1/sp|Q562E7|WDR81_HUMAN	54449	5714.38	2.43219e-09	5714.38	0	7.70929e-09
2618_LPQANRDTL_2_run0	1/sp|Q9H0H5|RGAP1_HUMAN	809565	2159.06	2.43487e-09	2159.06	0	7.73761e-09
3685_SPSLPNISL_2_run0	1/sp|Q9UQL6|HDAC5_HUMAN	82838	4724.92	2.43487e-09	4724.92	0	7.71784e-09
561_ILLEHIIM_2_run0	1/sp|Q9Y6X3|SCC4_HUMAN	66203	4869.44	2.43487e-09	4869.44	0	7.75243e-09
4011_YVQSMDVAAF_2_run0	1/sp|P24534|EF1B_HUMAN	36226	4255.94	2.43487e-09	4255.94	0	7.80415e-09
3947_VPSEPKLSL_2_run0	1/sp|Q6L8Q7|PDE12_HUMAN	88283	3392.78	2.44068e-09	3392.78	0	7.81234e-09
3661_SPRVPNSSV_2_run0	1/sp|Q9NR09|BIRC6_HUMAN	185748	1630.06	2.44068e-09	1630.06	0	7.83045e-09
2665_LPSASHFSQL_2_run0	1/sp|Q9Y520|PRC2C_HUMAN	91067	3274.75	2.44205e-09	3274.75	0	7.87989e-09
3831_TPRPM(UniMod:35)TAEL_2_run0	1/sp|P78357|CNTP1_HUMAN	126904	1950.43	2.44361e-09	1950.43	0	7.88283e-09
3349_SPAFSTRVL_2_run0	1/sp|Q7KZF4|SND1_HUMAN	225497	3277.45	2.44868e-09	3277.45	0	7.8923e-09
3268_RPTPKNSL_2_run0	1/sp|O95168|NDUB4_HUMAN	141143	902.542	2.44885e-09	902.542	0	7.89361e-09
2286_IPRVVQEGDVL_2_run0	1/sp|Q13608|PEX6_HUMAN	166466	3604.19	2.4537e-09	3604.19	0	7.90406e-09
2011_APVGVHPSL_2_run0	1/sp|A6NFQ2|F115C_HUMAN	51485	2532.48	2.46487e-09	2532.48	0	7.94214e-09
3965_WPNARISVM_2_run0	1/sp|Q9HCC0|MCCB_HUMAN	61893	3925.94	2.46615e-09	3925.94	0	7.99931e-09
2427_KPNDSRALQL_2_run0	1/sp|Q9NWX6|THG1_HUMAN	148176	2028.3	2.47287e-09	2028.3	0	8.00853e-09
3313_RVGPVRSAM_2_run0	1/sp|Q96RU8|TRIB1_HUMAN	181794	1359.34	2.47287e-09	1359.34	0	8.08663e-09
1752_APIQGNREEL_2_run0	1/sp|Q13435|SF3B2_HUMAN	101835	1981.64	2.47884e-09	1981.64	0	8.1246e-09
3888_VPEEARPAL_2_run0	1/sp|Q66K64|DCA15_HUMAN	445021	2274.61	2.48629e-09	2274.61	0	8.19124e-09
303_FLQEHNTTL_2_run0	1/sp|Q9P219|DAPLE_HUMAN	84374	2593.31	2.48629e-09	2593.31	0	8.15752e-09
209_FLDHVMYTI_2_run0	1/sp|Q13422|IKZF1_HUMAN	37896	4597.17	2.48706e-09	4597.17	0	8.21136e-09
1127_RLWNETVEL_2_run0	1/sp|Q8WUY9|DEP1B_HUMAN	281204	4148.73	2.48849e-09	4148.73	0	8.28245e-09
1655_APAPQGVRL_2_run0	1/sp|Q6PGN9|PSRC1_HUMAN	62200	2418.8	2.49462e-09	2418.8	0	8.28478e-09
762_KLQEQIFHL_2_run0	1/sp|Q9NQC1|JADE2_HUMAN	79508	3764.31	2.49664e-09	3764.31	0	8.40498e-09
1832_APREALAQTVL_2_run0	1/sp|Q99829|CPNE1_HUMAN	386484	3248.43	2.49664e-09	3248.43	0	8.43669e-09
2001_APTPIQALTL_2_run0	1/sp|Q9GZR7|DDX24_HUMAN	148695	4985.61	2.49664e-09	4985.61	0	8.33027e-09
2755_NPASKVIAL_2_run0	1/sp|Q00610|CLH1_HUMAN	125629	3033.72	2.49664e-09	3033.72	0	8.48581e-09
2889_RPANPPGVL_2_run0	1/sp|P35580|MYH10_HUMAN	343879	2181.34	2.49664e-09	2181.34	0	8.36036e-09
3940_VPRSSSM(UniMod:35)VL_2_run0	1/sp|Q9H992|MARH7_HUMAN	325304	1852.44	2.49664e-09	1852.44	0	8.31185e-09
147_AQYEHDLEV_2_run0	1/sp|P62826|RAN_HUMAN	71306	2640.6	2.49671e-09	2640.6	0	8.52382e-09
1970_APSPPLRAL_2_run0	1/sp|Q14674|ESPL1_HUMAN	186879	3047.51	2.49942e-09	3047.51	0	8.53581e-09
3955_VPVPHTTAL_2_run0	1/sp|P15291|B4GT1_HUMAN	121431	2710.47	2.50848e-09	2710.47	0	8.56262e-09
2526_KPVSLGQAL_2_run0	1/sp|O60341|KDM1A_HUMAN	154744	2799.01	2.51173e-09	2799.01	0	8.6971e-09
1081_RLLDSEIKI_2_run0	1/sp|P17980|PRS6A_HUMAN	172078	3565.93	2.51173e-09	3565.93	0	8.66567e-09
1328_TPVISGGPYEYR_2_run0	1/iRT|iRT_Biognosys|iRT_Biognosys	358846	3055.73	2.51173e-09	3055.73	0	8.6187e-09
1852_APRHGSLGF_2_run0	1/sp|P39023|RL3_HUMAN	156279	1858.19	2.51287e-09	1858.19	0	8.7173e-09
1853_APRHPSTNSLL_2_run0	1/sp|Q9P032|NDUF4_HUMAN	78576	2007.59	2.51644e-09	2007.59	0	8.7843e-09
1878_APRLQSEVA_2_run0	1/sp|P53990|IST1_HUMAN	314776	1839.74	2.52888e-09	1839.74	0	8.8125e-09
291_FLNKEITSV_2_run0	1/sp|Q9UI10|EI2BD_HUMAN	46278	3165.34	2.52888e-09	3165.34	0	8.80983e-09
482_GLYEGLTWL_2_run0	1/sp|P62330|ARF6_HUMAN	78338	6034.02	2.53015e-09	6034.02	0	8.89968e-09
2451_KPRDVSSVEL_2_run0	1/sp|Q01082|SPTB2_HUMAN	1022090	2078.39	2.53015e-09	2078.39	0	8.9087e-09
3629_SPRPNIILGL_2_run0	1/sp|Q9BTC0|DIDO1_HUMAN	312265	4503.98	2.53164e-09	4503.98	0	8.92278e-09
339_FLYQYSTRL_2_run0	1/sp|Q9BUN8|DERL1_HUMAN	59679	3876.49	2.53409e-09	3876.49	0	8.96996e-09
3709_SPTDRSMSSSL_2_run0	1/sp|O75448|MED24_HUMAN	48149	2024.98	2.53527e-09	2024.98	0	8.98317e-09
3063_RPLFPGSTV_2_run0	1/sp|Q00536|CDK16_HUMAN	240737	3281.17	2.53845e-09	3281.17	0	8.9889e-09
1746_APIGSRGPQL_2_run0	1/sp|Q9BRQ3|NUD22_HUMAN	159415	2385.08	2.54014e-09	2385.08	0	9.00684e-09
1694_APDKHHITPLL_2_run0	1/sp|P58546|MTPN_HUMAN	73468	2498.86	2.5594e-09	2498.86	0	9.04744e-09
1509_YLIDEPSAYL_2_run0	1/sp|P61221|ABCE1_HUMAN	65584	5012.59	2.5594e-09	5012.59	0	9.12009e-09
3899_VPKVVGSAV_2_run0	1/sp|Q9Y5A9|YTHD2_HUMAN	141517	2264.21	2.56091e-09	2264.21	0	9.12027e-09
75_ALLSRLEQI_2_run0	1/sp|Q9UKM9|RALY_HUMAN	70613	4297.39	2.56379e-09	4297.39	0	9.18538e-09
2279_IPRSFMMEV_2_run0	1/sp|Q7Z6E9|RBBP6_HUMAN	71839	4252.55	2.5719e-09	4252.55	0	9.23133e-09
340_FLYSDEVQI_2_run0	1/sp|Q9H0C5|BTBD1_HUMAN	106570	4604.61	2.57732e-09	4604.61	0	9.24984e-09
625_KIIDFIYTA_2_run0	1/sp|Q9P2N7|KLH13_HUMAN	129184	4522.44	2.57763e-09	4522.44	0	9.318e-09
1162_SISPIVLYL_2_run0	1/sp|Q53FV1|ORML2_HUMAN	38712	6174.77	2.57824e-09	6174.77	0	9.33586e-09
2713_MPDVGRSMQQL_2_run0	1/sp|Q5GLZ8|HERC4_HUMAN	75371	3426.14	2.58576e-09	3426.14	0	9.33724e-09
3528_SPNPDREAIL_2_run0	1/sp|Q7Z4L5|TT21B_HUMAN	98643	2513.25	2.58992e-09	2513.25	0	9.39106e-09
1525_YLLLKTHQL_2_run0	1/sp|Q5JVF3|PCID2_HUMAN	63860	3251.96	2.58992e-09	3251.96	0	9.36958e-09
2568_LPASVHPQL_2_run0	1/sp|Q9H0K1|SIK2_HUMAN	281358	2940.83	2.5934e-09	2940.83	0	9.58109e-09
3666_SPRYIFTM(UniMod:35)L_2_run0	1/sp|Q02880|TOP2B_HUMAN	296708	4320.23	2.59456e-09	4320.23	0	9.58789e-09
1010_QLAQFVHEV_2_run0	1/sp|A8MPP1|D11L8_HUMAN	307980	3533.02	2.59943e-09	3533.02	0	9.5946e-09
104_ALSKEGIVAL_2_run0	1/sp|P40227|TCPZ_HUMAN	208248	3500.66	2.6013e-09	3500.66	0	9.6048e-09
2410_KPLDRKLIL_2_run0	1/sp|P29401|TKT_HUMAN	52314	2519.81	2.61031e-09	2519.81	0	9.64498e-09
879_LLDVTPLSL_2_run0	3/sp|P11142|HSP7C_HUMAN/sp|P54652|HSP72_HUMAN/sp|P38646|GRP75_HUMAN	118560	5565.39	2.63168e-09	5565.39	0	9.65725e-09
1386_VLLGHIFYV_2_run0	1/sp|Q9Y6X3|SCC4_HUMAN	122790	5310.04	2.63848e-09	5310.04	0	9.67799e-09
2219_IIRENSISL_2_run0	1/sp|Q9H1A4|APC1_HUMAN	278328	3179.59	2.64713e-09	3179.59	0	9.76131e-09
1118_RLSSVNAEV_2_run0	1/sp|Q14246|EMR1_HUMAN	368095	2039.78	2.65915e-09	2039.78	0	9.76582e-09
1450_VQSMDVAAFNKI_2_run0	1/sp|P24534|EF1B_HUMAN	127864	4072.44	2.66737e-09	4072.44	0	9.77332e-09
3468_SPIQKPQGL_2_run0	1/sp|P51531|SMCA2_HUMAN	106437	2304.3	2.67486e-09	2304.3	0	9.82361e-09
2676_LPSNERAVQTL_2_run0	1/sp|Q9NR48|ASH1L_HUMAN	42833	2569.49	2.68144e-09	2569.49	0	9.8302e-09
3820_TPRGGVGIATVM_2_run0	1/sp|Q9P2G9|KLHL8_HUMAN	75731	3275.59	2.68928e-09	3275.59	0	9.92711e-09
3633_SPRPPLGSSL_2_run0	1/sp|Q8NHM5|KDM2B_HUMAN	1149370	2751.52	2.69894e-09	2751.52	0	9.99373e-09
1029_QLVDIIEKV_2_run0	1/sp|P61289|PSME3_HUMAN	687035	4539.49	2.69943e-09	4539.49	0	1.00746e-08
3305_RPYSQVNVL_2_run0	1/sp|P46939|UTRO_HUMAN	262431	2895.14	2.70897e-09	2895.14	0	1.01215e-08
3694_SPSPAKSTL_2_run0	1/sp|P42345|MTOR_HUMAN	62211	1337.06	2.71544e-09	1337.06	0	1.01505e-08
3607_SPRKPIDSL_2_run0	1/sp|Q9UQ35|SRRM2_HUMAN	146209	1798.1	2.72255e-09	1798.1	0	1.01566e-08
657_KLFDAPLSI_2_run0	1/sp|A8K0Z3|WASH1_HUMAN	240804	4787.17	2.72275e-09	4787.17	0	1.02065e-08
1370_VLIDYQRNV_2_run0	1/sp|O14980|XPO1_HUMAN	1078850	3035.16	2.73169e-09	3035.16	0	1.02597e-08
967_MLHSVTLFL_2_run0	1/sp|O15127|SCAM2_HUMAN	162322	5147.07	2.74196e-09	5147.07	0	1.03336e-08
1714_APFLRNVEL_2_run0	1/sp|A5YKK6|CNOT1_HUMAN	1458110	4232.58	2.74732e-09	4232.58	0	1.03635e-08
2700_LVRPVFGEL_2_run0	1/sp|O00506|STK25_HUMAN	236657	4295.43	2.75656e-09	4295.43	0	1.03808e-08
3448_SPGSPRPAL_2_run0	1/sp|Q9H211|CDT1_HUMAN	146097	1836.39	2.76014e-09	1836.39	0	1.04179e-08
1480_YLAERIPTL_2_run0	1/sp|P19237|TNNI1_HUMAN	369229	4046.96	2.77586e-09	4046.96	0	1.05922e-08
1208_SLLDPVPEV_2_run0	1/sp|Q92616|GCN1L_HUMAN	183868	4758.21	2.77799e-09	4758.21	0	1.06673e-08
496_GQIEVVPEV_2_run0	1/sp|Q92576|PHF3_HUMAN	207528	3918.54	2.7809e-09	3918.54	0	1.06839e-08
2531_KPWLRALQL_2_run0	1/sp|Q8NI99|ANGL6_HUMAN	94807	4238.71	2.78438e-09	4238.71	0	1.07044e-08
1447_VMTLVSTYL_2_run0	1/sp|Q9UNL2|SSRG_HUMAN	56568	5264.13	2.78438e-09	5264.13	0	1.06876e-08
315_FLTDSNNIKEV_2_run0	1/sp|Q15046|SYK_HUMAN	35347	3149.57	2.78752e-09	3149.57	0	1.07236e-08
1652_APAPPPEEV_2_run0	1/sp|Q8IVF7|FMNL3_HUMAN	166853	2228.73	2.78752e-09	2228.73	0	1.07623e-08
346_FMLPDPQNISL_2_run0	1/sp|Q8WW01|SEN15_HUMAN	59897	5779.59	2.79157e-09	5779.59	0	1.07768e-08
2936_RPDPAGHLTL_2_run0	1/sp|Q9NTJ4|MA2C1_HUMAN	91261	2503.81	2.79157e-09	2503.81	0	1.08019e-08
1200_SLIPTSPQV_2_run0	1/sp|Q5PRF9|SMAG2_HUMAN	115761	3881.52	2.80107e-09	3881.52	0	1.08463e-08
1925_APRTLVLLLSG_2_run0	1/sp|P01892|1A02_HUMAN	78778	4985.49	2.80607e-09	4985.49	0	1.08469e-08
3241_RPSPPVQSV_2_run0	1/sp|Q5VV67|PPRC1_HUMAN	289672	1862.39	2.81413e-09	1862.39	0	1.08776e-08
1043_RLAEVGQYEQV_2_run0	1/sp|A5YKK6|CNOT1_HUMAN	25127	2867.45	2.81413e-09	2867.45	0	1.0902e-08
2770_NPMTNRSTV_2_run0	1/sp|O00338|ST1C2_HUMAN	176475	1501.18	2.82594e-09	1501.18	0	1.09376e-08
1492_YLEELPEKLKL_3_run0	2/sp|P46439|GSTM5_HUMAN/sp|P09488|GSTM1_HUMAN	50671	4317.66	2.84295e-09	4317.66	0	1.09535e-08
479_GLYEFPLNKV_2_run0	1/sp|Q9UJA5|TRM6_HUMAN	32818	4582.57	2.84723e-09	4582.57	0	1.10457e-08
368_GAGSSEPVTGLDAK_2_run0	1/iRT|iRT_Biognosys|iRT_Biognosys	646191	2020.3	2.85733e-09	2020.3	0	1.11221e-08
1871_APRKVTAVIY_2_run0	1/sp|Q5T3J3|LRIF1_HUMAN	61566	2223.29	2.8609e-09	2223.29	0	1.16159e-08
2934_RPDLRMAAI_2_run0	1/sp|P46779|RL28_HUMAN	208781	2969.94	2.86511e-09	2969.94	0	1.1711e-08
2658_LPRSIGNLTQL_2_run0	1/sp|Q6UWE0|LRSM1_HUMAN	309808	4156.12	2.87009e-09	4156.12	0	1.17564e-08
3564_SPQQVSAQL_2_run0	1/sp|Q2TAL8|QRIC1_HUMAN	345016	2459.89	2.88535e-09	2459.89	0	1.18618e-08
1889_APRPDRLVNRL_3_run0	1/sp|O75534|CSDE1_HUMAN	421221	2382.12	2.88813e-09	2382.12	0	1.19128e-08
1698_APDSQRLKLL_2_run0	1/sp|Q9UQE7|SMC3_HUMAN	42186	2893.41	2.88872e-09	2893.41	0	1.20328e-08
1860_APRKGSFSAL_2_run0	1/sp|Q13619|CUL4A_HUMAN	73376	1849.96	2.89173e-09	1849.96	0	1.21579e-08
2761_NPEKRYNVL_2_run0	1/sp|Q1KMD3|HNRL2_HUMAN	235039	1891.28	2.89934e-09	1891.28	0	1.21643e-08
86_ALNELLQHV_2_run0	1/sp|Q9Y490|TLN1_HUMAN	170790	4204.63	2.89934e-09	4204.63	0	1.2193e-08
3470_SPISSNSHRSL_2_run0	1/sp|Q9NR09|BIRC6_HUMAN	21975	1495.11	2.89934e-09	1495.11	0	1.21832e-08
1395_VLMDRLPSL_2_run0	1/sp|O60287|NPA1P_HUMAN	817283	4498.96	2.90407e-09	4498.96	0	1.221e-08
769_KLSEIPLTL_2_run0	1/sp|Q9UIG0|BAZ1B_HUMAN	331471	4544.91	2.90437e-09	4544.91	0	1.22206e-08
2626_LPRALLSSL_2_run0	1/sp|Q96RQ9|OXLA_HUMAN	73249	4402.06	2.90437e-09	4402.06	0	1.22869e-08
977_MLPPPPLTA_2_run0	1/sp|P18858|DNLI1_HUMAN	269559	3935.33	2.90895e-09	3935.33	0	1.23336e-08
2290_IPSIRNGIL_2_run0	1/sp|Q93008|USP9X_HUMAN	845875	3815.57	2.91296e-09	3815.57	0	1.23491e-08
3904_VPMFRNVSL_2_run0	1/sp|O14980|XPO1_HUMAN	467688	4128.1	2.9172e-09	4128.1	0	1.23573e-08
633_KIMDYSLLL_2_run0	1/sp|Q8TBX8|PI42C_HUMAN	58332	5042.91	2.93068e-09	5042.91	0	1.23646e-08
2101_GPALSRTLSQL_2_run0	1/sp|Q96NY9|MUS81_HUMAN	37392	3697.45	2.93472e-09	3697.45	0	1.23794e-08
791_KLWGQSIQL_2_run0	1/sp|Q5T5J6|SWT1_HUMAN	104674	4301.79	2.94041e-09	4301.79	0	1.2464e-08
3839_TPRTNNIEL_2_run0	1/sp|Q9NVM9|ASUN_HUMAN	798537	2445.97	2.9425e-09	2445.97	0	1.25908e-08
2406_KPKTPSLTVF_2_run0	1/sp|P24928|RPB1_HUMAN	103942	3204.31	2.95049e-09	3204.31	0	1.26214e-08
731_KLLPQLTYL_2_run0	1/sp|P39687|AN32A_HUMAN	239355	4883.1	2.95074e-09	4883.1	0	1.26799e-08
3352_SPAGLKAVL_2_run0	1/sp|Q6P9B9|INT5_HUMAN	182420	3181	2.95384e-09	3181	0	1.27667e-08
2809_QPDQTRIVAL_2_run0	1/sp|P22087|FBRL_HUMAN	498905	3099.3	2.96305e-09	3099.3	0	1.27837e-08
2787_NPRQINWTVL_2_run0	1/sp|P83731|RL24_HUMAN	55768	4344.46	2.96592e-09	4344.46	0	1.27875e-08
612_IMLEALERV_2_run0	2/sp|P62308|RUXG_HUMAN/sp|A8MWD9|RUXGL_HUMAN	767511	4523.79	2.97415e-09	4523.79	0	1.28785e-08
428_GLLDLPFRV_2_run0	1/sp|A6NHR9|SMHD1_HUMAN	163220	5925.45	2.98132e-09	5925.45	0	1.29921e-08
3502_SPLVSRLTL_2_run0	1/sp|P40926|MDHM_HUMAN	71796	3988.44	2.98295e-09	3988.44	0	1.29982e-08
563_ILLKDILSV_2_run0	1/sp|Q13315|ATM_HUMAN	52377	5388.61	2.99287e-09	5388.61	0	1.30263e-08
3482_SPKPLVTPGSTL_2_run0	1/sp|Q9GZN2|TGIF2_HUMAN	131038	3119.78	3.00222e-09	3119.78	0	1.30934e-08
844_KVLERVNAV_2_run0	1/sp|Q9UL46|PSME2_HUMAN	485787	1748.64	3.00762e-09	1748.64	0	1.31224e-08
2685_LPSWGRAEL_2_run0	1/sp|Q96EP0|RNF31_HUMAN	301508	3893.57	3.01163e-09	3893.57	0	1.32795e-08
1048_RLAQHITYV_2_run0	1/sp|P33993|MCM7_HUMAN	1022620	2241.25	3.01424e-09	2241.25	0	1.32817e-08
1973_APSPSSSRSSF_2_run0	1/sp|Q6PCB5|RSBNL_HUMAN	53093	1580.8	3.01747e-09	1580.8	0	1.32827e-08
1119_RLTDYVAFL_2_run0	1/sp|Q99627|CSN8_HUMAN	243743	5193.94	3.01758e-09	5193.94	0	1.33565e-08
3582_SPREMVAQF_2_run0	1/sp|Q86YC3|NRROS_HUMAN	140673	3057.93	3.02166e-09	3057.93	0	1.33772e-08
1845_APRGLEPIAI_2_run0	1/sp|O43315|AQP9_HUMAN	513111	3827.87	3.03663e-09	3827.87	0	1.34004e-08
475_GLWGQSVPTA_2_run0	1/sp|Q9UBN6|TR10D_HUMAN	110914	3916.66	3.04879e-09	3916.66	0	1.3413e-08
2465_KPRNVQILNM_2_run0	1/sp|Q5SRD1|TI23B_HUMAN	51319	2772.72	3.05604e-09	2772.72	0	1.35445e-08
2300_ITAPPSRVL_2_run0	1/sp|O00767|ACOD_HUMAN	1283840	2694.01	3.0728e-09	2694.01	0	1.35446e-08
1356_VLFEKEVNEV_2_run0	1/sp|Q9BZQ8|NIBAN_HUMAN	54536	3486.71	3.07779e-09	3486.71	0	1.36047e-08
901_LLLKGVEAV_2_run0	1/sp|Q9UJV9|DDX41_HUMAN	38135	3649.03	3.07779e-09	3649.03	0	1.37163e-08
2274_IPRLPERMTTL_3_run0	1/sp|O95466|FMNL_HUMAN	187531	3701.05	3.07779e-09	3701.05	0	1.37297e-08
3614_SPRLPVGGFRSL_2_run0	1/sp|Q14669|TRIPC_HUMAN	278583	3730.84	3.0798e-09	3730.84	0	1.37928e-08
1137_RMFDGKFVVA_2_run0	1/sp|Q8TAS1|UHMK1_HUMAN	72207	3410.45	3.08823e-09	3410.45	0	1.38449e-08
411_GLIDGVVEA_2_run0	1/sp|P14866|HNRPL_HUMAN	173232	3912.29	3.09749e-09	3912.29	0	1.38559e-08
3015_RPITVSYAF_2_run0	1/sp|Q15427|SF3B4_HUMAN	100235	3731.4	3.10081e-09	3731.4	0	1.38654e-08
2084_FPRVYGVSL_2_run0	1/sp|Q9Y3L3|3BP1_HUMAN	190414	4455.12	3.10255e-09	4455.12	0	1.39081e-08
739_KLMDHIYAV_2_run0	1/sp|Q9UP83|COG5_HUMAN	222395	3193.69	3.11094e-09	3193.69	0	1.39421e-08
3948_VPSEQRQML_2_run0	1/sp|Q15572|TAF1C_HUMAN	54129	2062.46	3.1163e-09	2062.46	0	1.39855e-08
2407_KPKTTNIEL_2_run0	1/sp|Q15291|RBBP5_HUMAN	209864	1889.69	3.1263e-09	1889.69	0	1.40078e-08
630_KILEDVVGV_2_run0	1/sp|Q9ULW0|TPX2_HUMAN	409950	3643.27	3.12981e-09	3643.27	0	1.40814e-08
617_IVMEHVVFL_2_run0	1/sp|Q75V66|ANO5_HUMAN	95062	4951.87	3.13445e-09	4951.87	0	1.41549e-08
1465_YAYDGKDYLAL_2_run0	1/sp|P17693|HLAG_HUMAN	78452	3981.48	3.14772e-09	3981.48	0	1.42537e-08
3441_SPGPPAPHM_2_run0	1/sp|Q86SX3|CN080_HUMAN	95399	2060.22	3.15353e-09	2060.22	0	1.42977e-08
1939_APRVPVQAL_2_run0	1/sp|O75179|ANR17_HUMAN	2217070	3042.73	3.16382e-09	3042.73	0	1.43198e-08
2145_GPREAFRQL_2_run0	1/sp|P57086|SCND1_HUMAN	384866	2242.24	3.17029e-09	2242.24	0	1.43614e-08
1640_APAMIRISL_2_run0	1/sp|O75912|DGKI_HUMAN	156989	4475.49	3.18812e-09	4475.49	0	1.44494e-08
2515_KPTDKLRAL_2_run0	2/sp|Q6P474|PDXD2_HUMAN/sp|Q6P996|PDXD1_HUMAN	193535	1773.54	3.19909e-09	1773.54	0	1.44615e-08
673_KLHDINAQL_2_run0	1/sp|Q10567|AP1B1_HUMAN	93734	2274.21	3.20874e-09	2274.21	0	1.44631e-08
3371_SPALLRAL_2_run0	1/sp|Q9NXK8|FXL12_HUMAN	99044	3841.51	3.20932e-09	3841.51	0	1.45177e-08
215_FLDPNNIPKA_2_run0	1/sp|Q9BVK2|ALG8_HUMAN	445596	3352.6	3.21535e-09	3352.6	0	1.4548e-08
13_ALAAALAHI_2_run0	1/sp|Q9NR30|DDX21_HUMAN	155118	3843.63	3.2389e-09	3843.63	0	1.45691e-08
350_FMVDKAIYL_2_run0	1/sp|Q8TC92|ENOX1_HUMAN	122683	4554.49	3.24262e-09	4554.49	0	1.45744e-08
1674_APARPVNCL_2_run0	1/sp|O14562|UBFD1_HUMAN	151711	2315.27	3.25052e-09	2315.27	0	1.46801e-08
1679_APASPLRPL_2_run0	1/sp|P85037|FOXK1_HUMAN	72836	2889.61	3.25446e-09	2889.61	0	1.47219e-08
677_KLHGVNINV_2_run0	1/sp|Q9BQ04|RBM4B_HUMAN	477963	2552.81	3.25646e-09	2552.81	0	1.50356e-08
198_FLAKLIAQA_2_run0	1/sp|P50990|TCPQ_HUMAN	89721	3819.15	3.26201e-09	3819.15	0	1.52395e-08
3810_TPNDGRCHL_2_run0	1/sp|P05107|ITB2_HUMAN	49215	1331.53	3.26205e-09	1331.53	0	1.5243e-08
2143_GPRAPGPSLL_2_run0	1/sp|O00746|NDKM_HUMAN	123936	3047.07	3.26922e-09	3047.07	0	1.53401e-08
3334_SAMSGRNEL_2_run0	1/sp|Q68DK2|ZFY26_HUMAN	222490	1605	3.27729e-09	1605	0	1.53641e-08
856_LGGNEQVTR_2_run0	1/iRT|iRT_Biognosys|iRT_Biognosys	577733	1151.77	3.28231e-09	1151.77	0	1.54793e-08
3657_SPRTPVSPVKF_3_run0	1/sp|P23443|KS6B1_HUMAN	152652	2885.29	3.28773e-09	2885.29	0	1.566e-08
3924_VPRLPATAA_2_run0	1/sp|Q01581|HMCS1_HUMAN	72968	2423.26	3.28883e-09	2423.26	0	1.56863e-08
2724_MPPSGPRGTL_2_run0	1/sp|Q02818|NUCB1_HUMAN	419234	2165.03	3.29112e-09	2165.03	0	1.57382e-08
51_ALIEKLVEL_2_run0	1/sp|Q14181|DPOA2_HUMAN	332961	4920.89	3.29868e-09	4920.89	0	1.58078e-08
685_KLIDGQVIQL_2_run0	1/sp|P52747|ZN143_HUMAN	330708	4130.75	3.29932e-09	4130.75	0	1.5917e-08
14_ALADGVQKV_2_run0	1/sp|O14791|APOL1_HUMAN	964302	2061.46	3.30551e-09	2061.46	0	1.59453e-08
3821_TPRGGVGSVAL_2_run0	1/sp|Q9P2G9|KLHL8_HUMAN	350771	2611.19	3.30995e-09	2611.19	0	1.59587e-08
2071_FPNLRSISL_2_run0	1/sp|Q5QJ74|TBCEL_HUMAN	86396	4800.82	3.32494e-09	4800.82	0	1.59671e-08
3903_VPMEIKPGISL_2_run0	1/sp|Q9NV88|INT9_HUMAN	56169	4333.51	3.33072e-09	4333.51	0	1.5981e-08
3291_RPYAPINANAI_2_run0	1/sp|O94776|MTA2_HUMAN	622542	3169.7	3.34208e-09	3169.7	0	1.6089e-08
634_KIMTEKELLAV_2_run0	1/sp|Q14254|FLOT2_HUMAN	27028	3489.8	3.34905e-09	3489.8	0	1.62112e-08
2668_LPSDLRTISL_2_run0	1/sp|Q9C0A6|SETD5_HUMAN	371671	4267.11	3.35379e-09	4267.11	0	1.62894e-08
490_GMDRYLIYV_2_run0	1/sp|P05107|ITB2_HUMAN	100562	4662	3.35379e-09	4662	0	1.62942e-08
3492_SPLNRAGLL_2_run0	1/sp|Q92979|NEP1_HUMAN	125949	3204.49	3.35559e-09	3204.49	0	1.6373e-08
1425_VLWDRTFS_2_run0	1/sp|P42224|STAT1_HUMAN	194236	3730.47	3.3562e-09	3730.47	0	1.64199e-08
816_KMAEMLVEL_2_run0	1/sp|Q9Y605|MOFA1_HUMAN	136803	4513.31	3.36161e-09	4513.31	0	1.6556e-08
3505_SPMAERSMM(UniMod:35)_2_run0	1/sp|P18583|SON_HUMAN	131931	1452.93	3.36938e-09	1452.93	0	1.6559e-08
17_ALAEIAKAEL_2_run0	1/sp|P23246|SFPQ_HUMAN	331593	3637.15	3.3737e-09	3637.15	0	1.66494e-08
2166_GVRPVSGDL_2_run0	1/sp|Q9Y2U8|MAN1_HUMAN	136016	2119.86	3.38232e-09	2119.86	0	1.6656e-08
825_KMVEDLISV_2_run0	1/sp|Q9H583|HEAT1_HUMAN	157981	3991.78	3.38232e-09	3991.78	0	1.67045e-08
1199_SLINVGLISV_2_run0	1/sp|Q92688|AN32B_HUMAN	200418	5851.77	3.38729e-09	5851.77	0	1.67451e-08
1170_SLAETDKITL_2_run0	1/sp|P38606|VATA_HUMAN	56684	3469.26	3.39078e-09	3469.26	0	1.68735e-08
3946_VPSEGKKSL_2_run0	1/sp|Q9BXS6|NUSAP_HUMAN	62886	988.744	3.39434e-09	988.744	0	1.69007e-08
3530_SPNQARAQAAL_2_run0	1/sp|P26599|PTBP1_HUMAN	369420	1614.85	3.40375e-09	1614.85	0	1.69575e-08
1727_APGPRGSYL_2_run0	1/sp|A0AV96|RBM47_HUMAN	112322	2120.02	3.42504e-09	2120.02	0	1.69857e-08
2429_KPNEFASQINL_2_run0	1/sp|O15371|EIF3D_HUMAN	46684	3678.83	3.42533e-09	3678.83	0	1.7039e-08
1937_APRVLQQTL_2_run0	1/sp|O95373|IPO7_HUMAN	226982	2879.11	3.42565e-09	2879.11	0	1.70516e-08
3626_SPRPALPALL_2_run0	1/sp|P05362|ICAM1_HUMAN	448439	4394.98	3.42698e-09	4394.98	0	1.71064e-08
3996_YPRQQLLTL_2_run0	1/sp|Q15645|PCH2_HUMAN	128748	3868.44	3.42974e-09	3868.44	0	1.72439e-08
3984_YPLESRPSL_2_run0	1/sp|Q14980|NUMA1_HUMAN	149811	3085.67	3.43591e-09	3085.67	0	1.7247e-08
1562_YLTAEILEL_2_run0	1/sp|Q96QV6|H2A1A_HUMAN	229141	5779.92	3.45011e-09	5779.92	0	1.72861e-08
1110_RLQEEVHLL_2_run0	1/sp|Q674X7|KAZRN_HUMAN	156199	3198.77	3.45837e-09	3198.77	0	1.73491e-08
3422_SPETRENAL_2_run0	1/sp|Q92600|RCD1_HUMAN	145410	1374.9	3.46538e-09	1374.9	0	1.73528e-08
1168_SLAELKGFEV_2_run0	1/sp|Q07864|DPOE1_HUMAN	47073	4395.82	3.46909e-09	4395.82	0	1.73824e-08
3044_RPKPPSATSI_2_run0	1/sp|Q9UMS4|PRP19_HUMAN	60579	1691.19	3.46937e-09	1691.19	0	1.74217e-08
1173_SLAPLFFKL_2_run0	1/sp|O14617|AP3D1_HUMAN	37520	5930.24	3.47173e-09	5930.24	0	1.74867e-08
2972_RPGVSILAL_2_run0	1/sp|Q13206|DDX10_HUMAN	113920	4292.59	3.47866e-09	4292.59	0	1.75745e-08
711_KLLDLMPRL_2_run0	1/sp|Q96HW7|INT4_HUMAN	164264	4918.5	3.47866e-09	4918.5	0	1.75539e-08
3844_TPSELRSSTGIL_2_run0	1/sp|O60462|NRP2_HUMAN	42465	3203.63	3.48174e-09	3203.63	0	1.76015e-08
1586_YQKFLPLTQV_2_run0	1/sp|Q9BTE1|DCTN5_HUMAN	57382	4401.94	3.48539e-09	4401.94	0	1.76376e-08
2171_HPADNRTQI_2_run0	1/sp|P46939|UTRO_HUMAN	30912	882.619	3.48539e-09	882.619	0	1.76968e-08
748_KLNATNIEL_2_run0	1/sp|P28066|PSA5_HUMAN	252625	3254.34	3.4861e-09	3254.34	0	1.77245e-08
1379_VLLDHLSLA_2_run0	1/sp|P29459|IL12A_HUMAN	111916	4311.32	3.4923e-09	4311.32	0	1.77643e-08
257_FLLDKKIGV_2_run0	1/sp|P78371|TCPB_HUMAN	324957	3687.85	3.51389e-09	3687.85	0	1.77723e-08
48_ALIEAEKVAQV_2_run0	1/sp|O94905|ERLN2_HUMAN	26273	3346.97	3.522e-09	3346.97	0	1.77852e-08
2499_KPSGVSAAL_2_run0	1/sp|Q9Y3A4|RRP7A_HUMAN	419717	1899.75	3.53133e-09	1899.75	0	1.78157e-08
3425_SPFGKDVRLVSL_2_run0	1/sp|A8MPP1|D11L8_HUMAN	41067	4112.22	3.53886e-09	4112.22	0	1.78305e-08
1941_APRWLEEEAAL_2_run0	1/sp|Q53GL7|PAR10_HUMAN	39488	4270.98	3.55514e-09	4270.98	0	1.7906e-08
1429_VLWGETVHL_2_run0	1/sp|P41279|M3K8_HUMAN	154241	4584.61	3.55514e-09	4584.61	0	1.78474e-08
2377_KPIQRTILM_2_run0	1/sp|P13639|EF2_HUMAN	200135	2438.73	3.55649e-09	2438.73	0	1.79648e-08
100_ALSDHHIYL_2_run0	1/sp|P04075|ALDOA_HUMAN	258074	2928.97	3.56056e-09	2928.97	0	1.80096e-08
1329_TPVITGAPYEYR_2_run0	1/iRT|iRT_Biognosys|iRT_Biognosys	518593	3225.69	3.56056e-09	3225.69	0	1.80805e-08
2418_KPMKSVLVV_2_run0	1/sp|P32248|CCR7_HUMAN	436253	2510.42	3.56981e-09	2510.42	0	1.81196e-08
683_KLIDETQDM(UniMod:35)LL_2_run0	1/sp|Q5T4S7|UBR4_HUMAN	40176	3711.28	3.57393e-09	3711.28	0	1.8142e-08
671_KLGLKPLEV_2_run0	1/sp|O43290|SNUT1_HUMAN	85304	3283.57	3.57765e-09	3283.57	0	1.82175e-08
1238_SLPDFGISYV_2_run0	1/sp|Q86UX7|URP2_HUMAN	170443	5407.54	3.59208e-09	5407.54	0	1.82762e-08
1519_YLKDLIEEV_2_run0	1/sp|P18848|ATF4_HUMAN	173308	4474.62	3.59482e-09	4474.62	0	1.82966e-08
2303_IVQATRTSL_2_run0	1/sp|Q6VMQ6|MCAF1_HUMAN	96058	2010.82	3.60042e-09	2010.82	0	1.83022e-08
1205_SLLASLHTL_2_run0	1/sp|Q8IZL8|PELP1_HUMAN	37842	4534.67	3.60531e-09	4534.67	0	1.83634e-08
3020_RPKALTQVL_2_run0	1/sp|Q9Y2Q5|LTOR2_HUMAN	192761	2477.45	3.61336e-09	2477.45	0	1.85028e-08
3623_SPRNEVEAL_2_run0	1/sp|Q5R372|RBG1L_HUMAN	953315	2205.84	3.62026e-09	2205.84	0	1.85865e-08
1738_APHLVGPHL_2_run0	2/sp|Q6P2I3|FAH2B_HUMAN/sp|Q96GK7|FAH2A_HUMAN	293255	2651.43	3.62384e-09	2651.43	0	1.85972e-08
247_FLIRESETL_2_run0	1/sp|P07948|LYN_HUMAN	306757	3651.36	3.63751e-09	3651.36	0	1.86075e-08
1873_APRLGISL_2_run0	1/sp|Q7Z7A3|CTU1_HUMAN	712138	3762.61	3.64419e-09	3762.61	0	1.8657e-08
3823_TPRHLQLAI_2_run0	2/sp|P0C0S5|H2AZ_HUMAN/sp|Q71UI9|H2AV_HUMAN	87698	3010.97	3.65016e-09	3010.97	0	1.86788e-08
1791_APLSEDQRTAL_2_run0	1/sp|O15397|IPO8_HUMAN	33597	2367.29	3.65143e-09	2367.29	0	1.87133e-08
3134_RPQTGLSFL_2_run0	1/sp|P43686|PRS6B_HUMAN	534056	3963.17	3.67303e-09	3963.17	0	1.88038e-08
1360_VLFGVETHV_2_run0	1/sp|Q96CN7|ISOC1_HUMAN	186882	3816.52	3.68832e-09	3816.52	0	1.88518e-08
324_FLVTVIHTL_2_run0	1/sp|O60486|PLXC1_HUMAN	94403	4882.87	3.68891e-09	4882.87	0	1.89206e-08
1011_QLDDLKVEL_2_run0	1/sp|P42766|RL35_HUMAN	80127	4168.84	3.69185e-09	4168.84	0	1.89306e-08
1014_QLIDKVWQL_2_run0	1/sp|Q92503|S14L1_HUMAN	252140	4871.91	3.70175e-09	4871.91	0	1.91137e-08
2072_FPQATRQSL_2_run0	1/sp|Q9ULV3|CIZ1_HUMAN	229560	2408.41	3.71135e-09	2408.41	0	1.91369e-08
2607_LPMKVRALGL_2_run0	1/sp|Q9BYD3|RM04_HUMAN	97097	3704.22	3.73045e-09	3704.22	0	1.92497e-08
1692_APDGTRNLTA_2_run0	1/sp|Q9C0E2|XPO4_HUMAN	58406	1508.41	3.7434e-09	1508.41	0	1.9326e-08
2036_AVILRALSL_2_run0	1/sp|P20036|DPA1_HUMAN	281368	4696.38	3.75083e-09	4696.38	0	1.93317e-08
192_FLADIVQKL_2_run0	1/sp|Q9NZJ4|SACS_HUMAN	64791	4898.65	3.75644e-09	4898.65	0	1.94095e-08
1026_QLSPRLLEV_2_run0	1/sp|Q460N5|PAR14_HUMAN	61229	4030.43	3.76718e-09	4030.43	0	1.95089e-08
2596_LPKQPPLAL_2_run0	1/sp|Q96S59|RANB9_HUMAN	461896	3664.17	3.79086e-09	3664.17	0	1.95094e-08
931_LLSPVVPQI_2_run0	1/sp|Q8N1F7|NUP93_HUMAN	405443	4952.32	3.79757e-09	4952.32	0	1.95938e-08
1489_YLDQTLPRA_2_run0	1/sp|A8MPP1|D11L8_HUMAN	151052	2805.37	3.81286e-09	2805.37	0	1.96614e-08
2559_LPALRSIGL_2_run0	1/sp|P19793|RXRA_HUMAN	169134	4476.07	3.81961e-09	4476.07	0	1.96664e-08
2834_QPRYPVNSV_2_run0	1/sp|P17987|TCPA_HUMAN	140952	2198.37	3.82207e-09	2198.37	0	1.97937e-08
3450_SPGVGKTSL_2_run0	1/sp|Q9NU22|MDN1_HUMAN	132359	1775.24	3.82886e-09	1775.24	0	1.9902e-08
1596_YVVPFVAKV_2_run0	1/sp|A5YKK6|CNOT1_HUMAN	119506	4461.71	3.83453e-09	4461.71	0	2.01006e-08
3817_TPRDLAVPAAL_2_run0	1/sp|Q8TEM1|PO210_HUMAN	181435	3674.81	3.84265e-09	3674.81	0	2.01625e-08
1145_RVMPSSFFL_2_run0	1/sp|O75663|TIPRL_HUMAN	81404	4868.13	3.85005e-09	4868.13	0	2.023e-08
1410_VLQGKLAEV_2_run0	1/sp|Q9UPN3|MACF1_HUMAN	105033	2686.8	3.85005e-09	2686.8	0	2.02095e-08
3542_SPQANRTYV_2_run0	1/sp|Q9Y2I7|FYV1_HUMAN	58347	1522.89	3.85957e-09	1522.89	0	2.02809e-08
3033_RPKIVQSLL_2_run0	1/sp|Q86VV8|RTTN_HUMAN	25924	3035.38	3.86667e-09	3035.38	0	2.0284e-08
390_GLATDVQTV_2_run0	1/sp|P49720|PSB3_HUMAN	609005	2912.08	3.8717e-09	2912.08	0	2.02903e-08
153_AVANIVNSV_2_run0	1/sp|Q9BRQ8|AIFM2_HUMAN	150268	3416.73	3.88412e-09	3416.73	0	2.032e-08
3391_SPASRSISL_2_run0	1/sp|P32970|CD70_HUMAN	1727770	2341.76	3.89041e-09	2341.76	0	2.04045e-08
4012_YVRDNTGVL_2_run0	1/sp|Q2NKJ3|CTC1_HUMAN	409460	2195.35	3.89435e-09	2195.35	0	2.0474e-08
2890_RPAPAAPLL_2_run0	1/sp|Q96PM9|Z385A_HUMAN	1156340	2971.66	3.90565e-09	2971.66	0	2.05177e-08
660_KLFDRPQEL_2_run0	1/sp|Q5VZ89|DEN4C_HUMAN	198824	2922.12	3.91419e-09	2922.12	0	2.06316e-08
3860_TPSSRPASL_2_run0	1/sp|Q96S82|UBL7_HUMAN	198779	1531.42	3.93439e-09	1531.42	0	2.06418e-08
1064_RLIEETISI_2_run0	1/sp|O95249|GOSR1_HUMAN	230904	3963.62	3.94813e-09	3963.62	0	2.06942e-08
457_GLSVIIPHV_2_run0	1/sp|Q15048|LRC14_HUMAN	80876	4623.89	3.95236e-09	4623.89	0	2.08449e-08
1504_YLGPHIASV_2_run0	1/sp|Q96GC9|VMP1_HUMAN	71872	3241.66	3.96287e-09	3241.66	0	2.09113e-08
3536_SPNSGQSSAL_2_run0	1/sp|Q86VQ1|GLCI1_HUMAN	106351	1340.75	3.96442e-09	1340.75	0	2.11006e-08
2120_GPIYPGHGM_2_run0	1/sp|Q9UHA3|RLP24_HUMAN	233839	2378.65	3.9831e-09	2378.65	0	2.11406e-08
1473_YIYDKDMEII_2_run0	1/sp|Q9UPT9|UBP22_HUMAN	171223	4282.94	3.99893e-09	4282.94	0	2.11559e-08
1563_YLTAEVLEL_2_run0	1/sp|Q71UI9|H2AV_HUMAN	36196	5360.92	3.99893e-09	5360.92	0	2.11625e-08
2691_LPVLREGVL_2_run0	1/sp|Q92616|GCN1L_HUMAN	139203	4046.78	4.0027e-09	4046.78	0	2.11968e-08
1227_SLLQTLYKV_2_run0	1/sp|P46060|RAGP1_HUMAN	273248	4714.74	4.00404e-09	4714.74	0	2.12245e-08
3790_TPKEKAQAL_2_run0	1/sp|P46013|KI67_HUMAN	160050	907.204	4.02219e-09	907.204	0	2.13316e-08
2155_GPRSAQVAQSL_2_run0	1/sp|Q9NU22|MDN1_HUMAN	67828	1960.03	4.02446e-09	1960.03	0	2.14947e-08
601_ILVKHLTNV_2_run0	1/sp|A1A4S6|RHG10_HUMAN	45898	2384.93	4.02579e-09	2384.93	0	2.16662e-08
3590_SPRGHLTSL_2_run0	1/sp|Q9NPQ8|RIC8A_HUMAN	169516	1607.42	4.0311e-09	1607.42	0	2.17056e-08
1801_APNERPYSL_2_run0	1/sp|Q01151|CD83_HUMAN	206400	2325.05	4.03237e-09	2325.05	0	2.17387e-08
2176_HPHAVNEIAL_2_run0	1/sp|Q96PY5|FMNL2_HUMAN	339036	2495.39	4.04182e-09	2495.39	0	2.17951e-08
3098_RPNNAYTAM_2_run0	1/sp|Q9Y5A9|YTHD2_HUMAN	177604	1691.26	4.04438e-09	1691.26	0	2.17994e-08
1156_SILEDPPSI_2_run0	1/sp|Q9NVM9|ASUN_HUMAN	533375	4234.11	4.05355e-09	4234.11	0	2.18325e-08
2221_IPAEGRVAL_2_run0	1/sp|Q9UBQ7|GRHPR_HUMAN	1251850	2775.42	4.06753e-09	2775.42	0	2.18686e-08
1976_APSPVIPRL_2_run0	1/sp|Q5VWG9|TAF3_HUMAN	152613	3726.86	4.07126e-09	3726.86	0	2.18686e-08
3254_RPSSTITYL_2_run0	1/sp|Q5SWH9|TMM69_HUMAN	350882	2911.44	4.07837e-09	2911.44	0	2.19053e-08
2463_KPRLDTEQL_2_run0	1/sp|Q86UE8|TLK2_HUMAN	191450	1965.18	4.09687e-09	1965.18	0	2.19314e-08
1163_SIYGGFLLGV_2_run0	1/sp|P35606|COPB2_HUMAN	30114	6081.33	4.10216e-09	6081.33	0	2.19778e-08
3579_SPREAARVL_2_run0	1/sp|Q2T9J0|TYSD1_HUMAN	59359	1557.3	4.10216e-09	1557.3	0	2.19397e-08
3524_SPNLRLLDL_2_run0	1/sp|Q8N531|FBXL6_HUMAN	759534	4822.84	4.10992e-09	4822.84	0	2.20664e-08
216_FLDPRPLTV_2_run0	1/sp|Q16678|CP1B1_HUMAN	533173	3935.8	4.12024e-09	3935.8	0	2.23329e-08
2140_GPQAVRAAL_2_run0	1/sp|O95602|RPA1_HUMAN	231819	2166.73	4.12068e-09	2166.73	0	2.24556e-08
300_FLPSYIIDV_2_run0	1/sp|Q10570|CPSF1_HUMAN	82796	5743.92	4.12779e-09	5743.92	0	2.24619e-08
1749_APILKRAL_2_run0	1/sp|Q9ULQ0|STRP2_HUMAN	224657	2111.6	4.13142e-09	2111.6	0	2.25982e-08
1828_APRAVFPSI_2_run0	1/sp|P62736|ACTA_HUMAN	829208	3805.76	4.14204e-09	3805.76	0	2.27004e-08
2974_RPHAFQVIL_2_run0	1/sp|Q8IWE5|PKHM2_HUMAN	143157	3545.8	4.15842e-09	3545.8	0	2.30675e-08
3156_RPREALSTNEC_3_run0	1/sp|O00116|ADAS_HUMAN	113627	1344.11	4.1684e-09	1344.11	0	2.30873e-08
1482_YLAPHVRTL_2_run0	1/sp|Q13098|CSN1_HUMAN	40564	2575.61	4.17104e-09	2575.61	0	2.3117e-08
2000_APTPARPVL_2_run0	1/sp|Q9HAB3|S52A2_HUMAN	490342	2396.52	4.17426e-09	2396.52	0	2.331e-08
450_GLNEEIARV_2_run0	1/sp|O14777|NDC80_HUMAN	547878	3060.87	4.18594e-09	3060.87	0	2.35153e-08
2069_FPNIPGKSL_2_run0	1/sp|O15121|DEGS1_HUMAN	1270970	3533.72	4.19218e-09	3533.72	0	2.35677e-08
3182_RPRKAFLLLL_2_run0	1/sp|P13667|PDIA4_HUMAN	225038	4153.22	4.19274e-09	4153.22	0	2.37577e-08
2217_IARLPSSTL_2_run0	1/sp|Q86Y91|KI18B_HUMAN	889666	2931.24	4.19847e-09	2931.24	0	2.37727e-08
2756_NPASPPLSL_2_run0	1/sp|Q13155|AIMP2_HUMAN	115380	3757.65	4.20271e-09	3757.65	0	2.38415e-08
2340_KPASTSGKSEL_2_run0	1/sp|O75592|MYCB2_HUMAN	14285	771.649	4.20524e-09	771.649	0	2.41454e-08
2976_RPHFSIIAI_2_run0	1/sp|P42694|HELZ_HUMAN	145432	4081.97	4.21356e-09	4081.97	0	2.44011e-08
3905_VPMTSRLGL_2_run0	1/sp|P78527|PRKDC_HUMAN	168018	3440.38	4.2245e-09	3440.38	0	2.44256e-08
2551_LIRPVSASF_2_run0	1/sp|P05496|AT5G1_HUMAN	207202	3325.35	4.22938e-09	3325.35	0	2.44831e-08
3426_SPFHRNLFL_2_run0	1/sp|Q96EX3|WDR34_HUMAN	89466	3562.62	4.23901e-09	3562.62	0	2.48313e-08
2110_GPDHLRSASSL_2_run0	1/sp|Q9Y2L5|TPPC8_HUMAN	9899	1735.98	4.23901e-09	1735.98	0	2.50459e-08
2098_GPAIERMGL_2_run0	1/sp|P52272|HNRPM_HUMAN	327690	3203.31	4.24716e-09	3203.31	0	2.50476e-08
323_FLVQNIHTL_2_run0	1/sp|Q8TDN6|BRX1_HUMAN	226001	4065.52	4.25348e-09	4065.52	0	2.51428e-08
2982_RPHKATAEEM_2_run0	1/sp|Q92769|HDAC2_HUMAN	8587	661.457	4.26236e-09	661.457	0	2.51541e-08
3269_RPTSKRDSL_2_run0	1/sp|P35251|RFC1_HUMAN	78929	638.091	4.26236e-09	638.091	0	2.51837e-08
1266_SVIEQIVYV_2_run0	1/sp|Q00653|NFKB2_HUMAN	201916	4927.61	4.27457e-09	4927.61	0	2.52071e-08
815_KMAELVHFL_2_run0	1/sp|P43365|MAGAC_HUMAN	82581	4288.27	4.28478e-09	4288.27	0	2.52346e-08
3191_RPRNLGELCQRL_3_run0	1/sp|Q9UI14|PRAF1_HUMAN	143800	3025.14	4.28766e-09	3025.14	0	2.5408e-08
3346_SPADHRGYASL_2_run0	1/sp|Q06945|SOX4_HUMAN	100419	1850.74	4.31055e-09	1850.74	0	2.54355e-08
715_KLLDVVHPA_2_run0	1/sp|Q99832|TCPH_HUMAN	39700	2730.8	4.32084e-09	2730.8	0	2.54859e-08
1306_TLMGHMLYL_2_run0	1/sp|Q9Y450|HBS1L_HUMAN	40211	4922.54	4.32477e-09	4922.54	0	2.56071e-08
2748_MPSSAVRVL_2_run0	1/sp|Q8N0X2|SPG16_HUMAN	60614	3006.99	4.33258e-09	3006.99	0	2.56688e-08
2273_IPRLIVSQL_2_run0	1/sp|Q9BXW9|FACD2_HUMAN	346989	4485.09	4.348e-09	4485.09	0	2.58288e-08
1133_RLYPWGVVEV_2_run0	1/sp|Q15019|SEPT2_HUMAN	381413	4944.75	4.3683e-09	4944.75	0	2.58467e-08
1806_APNPYRQAIMSF_2_run0	1/sp|Q7RTS9|DYM_HUMAN	36481	4295.12	4.3758e-09	4295.12	0	2.59445e-08
111_ALTELLAKI_2_run0	1/sp|P30279|CCND2_HUMAN	185566	5089.36	4.37747e-09	5089.36	0	2.60235e-08
2903_RPAPTAATTL_2_run0	1/sp|Q66K41|Z385C_HUMAN	142893	1981.54	4.38081e-09	1981.54	0	2.60379e-08
2368_KPHSGFHVAF_2_run0	1/sp|Q8IYU8|MICU2_HUMAN	188784	2463.77	4.38461e-09	2463.77	0	2.61161e-08
1088_RLLEVPVML_2_run0	1/sp|Q96AB3|ISOC2_HUMAN	310095	5245.43	4.39047e-09	5245.43	0	2.61781e-08
59_ALLDSAHLL_2_run0	1/sp|O14617|AP3D1_HUMAN	213633	4391.68	4.39675e-09	4391.68	0	2.62944e-08
874_LLDPNVKSIFV_2_run0	1/sp|O43414|ERI3_HUMAN	92441	4863.45	4.40341e-09	4863.45	0	2.63325e-08
1394_VLMDHILNL_2_run0	1/sp|O15111|IKKA_HUMAN	41472	5035.73	4.40522e-09	5035.73	0	2.64011e-08
1068_RLIESLFT_2_run0	1/sp|Q12789|TF3C1_HUMAN	175500	4244.14	4.4099e-09	4244.14	0	2.65697e-08
240_FLIEEQKIVV_2_run0	1/sp|P49207|RL34_HUMAN	34591	4519.81	4.42045e-09	4519.81	0	2.66597e-08
542_ILDKKVEKV_2_run0	2/sp|P08238|HS90B_HUMAN/sp|Q58FF7|H90B3_HUMAN	381372	1389.57	4.43262e-09	1389.57	0	2.66988e-08
2906_RPAQLHIGF_2_run0	1/sp|P22314|UBA1_HUMAN	204512	3206.93	4.43522e-09	3206.93	0	2.67474e-08
2710_MPARWLTHL_2_run0	1/sp|Q92685|ALG3_HUMAN	108619	3759.47	4.43613e-09	3759.47	0	2.67513e-08
2923_RPDGEKKAYVRL_3_run0	1/sp|P62750|RL23A_HUMAN	196721	1557.14	4.45156e-09	1557.14	0	2.67931e-08
445_GLMGAGIAQV_2_run0	1/sp|P40939|ECHA_HUMAN	42518	4008.34	4.4612e-09	4008.34	0	2.68284e-08
2899_RPAPPPEAL_2_run0	1/sp|Q9NQG6|MID51_HUMAN	631034	2130.88	4.47473e-09	2130.88	0	2.69054e-08
1971_APSPPLSGL_2_run0	1/sp|Q96GQ5|CP058_HUMAN	95629	3686.83	4.47473e-09	3686.83	0	2.69326e-08
1589_YQYPVIIHL_2_run0	1/sp|Q9BW60|ELOV1_HUMAN	72287	4977.28	4.47814e-09	4977.28	0	2.69663e-08
2412_KPLGIKTAL_2_run0	1/sp|Q63HN8|RN213_HUMAN	98773	2476.46	4.48536e-09	2476.46	0	2.70658e-08
157_AVLSKEYGFVL_2_run0	1/sp|O14880|MGST3_HUMAN	56044	4692.05	4.49801e-09	4692.05	0	2.71208e-08
143_AMPALAPPEV_2_run0	1/sp|P62826|RAN_HUMAN	100545	4263.65	4.51371e-09	4263.65	0	2.72668e-08
2783_NPRLIASSL_2_run0	1/sp|Q14C86|GAPD1_HUMAN	143648	3163.33	4.53019e-09	3163.33	0	2.74425e-08
3794_TPKKLGNSL_2_run0	1/sp|Q14980|NUMA1_HUMAN	49901	1325.39	4.5335e-09	1325.39	0	2.76252e-08
2196_HPRGGVIQSV_2_run0	1/sp|Q96B23|CR025_HUMAN	117000	1598.85	4.54123e-09	1598.85	0	2.76484e-08
2013_APVLPHTAV_2_run0	2/sp|Q8NHM5|KDM2B_HUMAN/sp|Q6PCT2|FXL19_HUMAN	536399	2700.73	4.55639e-09	2700.73	0	2.76654e-08
2456_KPRGLFITI_2_run0	1/sp|P48163|MAOX_HUMAN	97944	3994.27	4.56269e-09	3994.27	0	2.77466e-08
426_GLLAGDRLVEV_2_run0	1/sp|O14745|NHRF1_HUMAN	49801	4234.7	4.60595e-09	4234.7	0	2.7755e-08
3491_SPLKKEQPL_2_run0	1/sp|Q53H80|AKIR2_HUMAN	124363	1544.06	4.61496e-09	1544.06	0	2.77813e-08
113_ALTPVVVTL_2_run0	1/sp|P11802|CDK4_HUMAN	89032	4979.72	4.61761e-09	4979.72	0	2.79786e-08
1130_RLYDPASGTISL_2_run0	1/sp|Q9NRK6|ABCBA_HUMAN	71246	4083.85	4.62518e-09	4083.85	0	2.79947e-08
544_ILDQKINEV_2_run0	1/sp|P11926|DCOR_HUMAN	470113	2718.46	4.63749e-09	2718.46	0	2.80107e-08
2793_NPRVKAAAL_2_run0	1/sp|O15269|SPTC1_HUMAN	122852	1496.6	4.64344e-09	1496.6	0	2.81054e-08
1884_APRPAGSYL_2_run0	1/sp|P33076|C2TA_HUMAN	695765	2239.59	4.64344e-09	2239.59	0	2.81054e-08
2688_LPTGDRTGL_2_run0	1/sp|O00329|PK3CD_HUMAN	89906	2153.02	4.64983e-09	2153.02	0	2.81527e-08
1277_TLDDLIAAV_2_run0	1/sp|Q8IWZ3|ANKH1_HUMAN	72249	5218.98	4.6696e-09	5218.98	0	2.81535e-08
1002_NMLEAVHTI_2_run0	1/sp|P33981|TTK_HUMAN	83579	3725.95	4.6731e-09	3725.95	0	2.82382e-08
885_LLGPPPVGV_2_run0	1/sp|Q9ULV3|CIZ1_HUMAN	643900	4090.38	4.68261e-09	4090.38	0	2.82741e-08
2785_NPRNTEAVTL_2_run0	1/sp|Q9UKF6|CPSF3_HUMAN	490391	2199.72	4.69528e-09	2199.72	0	2.83462e-08
3541_SPPSVQRAGL_2_run0	1/sp|Q9H6F5|CCD86_HUMAN	92062	2133.14	4.7005e-09	2133.14	0	2.84055e-08
2103_GPAPRVLSL_2_run0	1/sp|P49750|YLPM1_HUMAN	192460	3423.3	4.70465e-09	3423.3	0	2.8528e-08
1527_YLLPKDQGITL_2_run0	1/sp|O95273|CCDB1_HUMAN	39047	4292.96	4.71343e-09	4292.96	0	2.86871e-08
2772_NPNMRLSQL_2_run0	1/sp|Q96CT7|CC124_HUMAN	241366	3040.1	4.72449e-09	3040.1	0	2.87647e-08
2847_RAKSQGMAL_2_run0	1/sp|P53618|COPB_HUMAN	188816	1228.22	4.73861e-09	1228.22	0	2.89181e-08
908_LLLPGELAKHAV_3_run0	15/sp|P57053|H2BFS_HUMAN/sp|Q8N257|H2B3B_HUMAN/sp|Q5QNW6|H2B2F_HUMAN/sp|Q16778|H2B2E_HUMAN/sp|P23527|H2B1O_HUMAN/sp|Q99877|H2B1N_HUMAN/sp|Q99879|H2B1M_HUMAN/sp|Q99880|H2B1L_HUMAN/sp|O60814|H2B1K_HUMAN/sp|P06899|H2B1J_HUMAN/sp|Q93079|H2B1H_HUMAN/sp|P58876|H2B1D_HUMAN/sp|P62807|H2B1C_HUMAN/sp|P33778|H2B1B_HUMAN/sp|Q96A08|H2B1A_HUMAN	104021	3944.78	4.74562e-09	3944.78	0	2.89666e-08
2416_KPLSGLLNAL_2_run0	1/sp|Q8N668|COMD1_HUMAN	48291	4752.78	4.75808e-09	4752.78	0	2.90447e-08
1827_APRAPAAGL_2_run0	1/sp|Q86YV0|RASL3_HUMAN	194030	1929.75	4.77478e-09	1929.75	0	2.91057e-08
3662_SPRVQFQSL_2_run0	1/sp|Q8N720|ZN655_HUMAN	712720	3178.3	4.77656e-09	3178.3	0	2.91648e-08
1175_SLAQYLINV_2_run0	1/sp|Q15366|PCBP2_HUMAN	238145	5432.18	4.77864e-09	5432.18	0	2.91725e-08
2706_MPAFSKIGGIL_2_run0	1/sp|P46940|IQGA1_HUMAN	38481	4971.22	4.78068e-09	4971.22	0	2.91997e-08
2030_APYSRPKQL_2_run0	1/sp|Q86V81|THOC4_HUMAN	426523	1602.74	4.79043e-09	1602.74	0	2.92958e-08
1507_YLHSQVVSV_2_run0	1/sp|Q03519|TAP2_HUMAN	238696	2690.37	4.79114e-09	2690.37	0	2.93067e-08
3252_RPSSQYIVAL_2_run0	3/sp|Q01650|LAT1_HUMAN/sp|Q8MH63|LAT1N_HUMAN/sp|Q9GIP4|LAT1L_HUMAN	242409	3654.85	4.79114e-09	3654.85	0	2.92986e-08
3787_TPISRLVAL_2_run0	1/sp|Q9H765|ASB8_HUMAN	248373	4221.32	4.80373e-09	4221.32	0	2.95448e-08
3160_RPREQNGAIYL_2_run0	1/sp|Q95460|HMR1_HUMAN	61724	2366.22	4.81055e-09	2366.22	0	2.9692e-08
1559_YLSKIIPAL_2_run0	1/sp|P40937|RFC5_HUMAN	116306	4602.65	4.81577e-09	4602.65	0	2.97654e-08
1084_RLLEATSYL_2_run0	1/sp|O60341|KDM1A_HUMAN	181383	3871.96	4.81577e-09	3871.96	0	3.03917e-08
3293_RPYEPINSI_2_run0	1/sp|Q8WUA4|TF3C2_HUMAN	317533	2989.57	4.81863e-09	2989.57	0	3.04181e-08
976_MLNEHDFEV_2_run0	1/sp|P38398|BRCA1_HUMAN	61089	3641.66	4.83272e-09	3641.66	0	3.06886e-08
2335_KPAPPFNVTV_2_run0	1/sp|Q9HBE5|IL21R_HUMAN	103902	3659.96	4.83997e-09	3659.96	0	3.08406e-08
1286_TLIDLPGITKV_2_run0	1/sp|P50570|DYN2_HUMAN	57378	5022.56	4.84103e-09	5022.56	0	3.08531e-08
1284_TLGNVLVTV_2_run0	1/sp|Q9NV70|EXOC1_HUMAN	54099	4511.81	4.8464e-09	4511.81	0	3.09759e-08
1241_SLQDEIQRV_2_run0	1/sp|Q9UNX4|WDR3_HUMAN	584171	3251.19	4.85081e-09	3251.19	0	3.10554e-08
3031_RPKGGSGDTL_2_run0	1/sp|Q96F44|TRI11_HUMAN	44696	728.703	4.86231e-09	728.703	0	3.11855e-08
3687_SPSLPSRTL_2_run0	1/sp|O75140|DEPD5_HUMAN	176648	2598.06	4.86576e-09	2598.06	0	3.12528e-08
3621_SPRMPSSGF_2_run0	1/sp|Q15018|F175B_HUMAN	115324	2461.13	4.88559e-09	2461.13	0	3.13736e-08
50_ALIEGVGILL_2_run0	1/sp|O60830|TI17B_HUMAN	44041	6145.85	4.89003e-09	6145.85	0	3.14143e-08
2654_LPRPVPQNL_2_run0	1/sp|Q9NWF9|RN216_HUMAN	667618	3120.11	4.89848e-09	3120.11	0	3.1427e-08
3606_SPRKLPTSL_2_run0	1/sp|Q9UIG0|BAZ1B_HUMAN	320707	2124.55	4.92164e-09	2124.55	0	3.15983e-08
877_LLDSAPLNV_2_run0	1/sp|Q8NI36|WDR36_HUMAN	136118	4098.63	4.942e-09	4098.63	0	3.1639e-08
506_HLANIVERV_2_run0	1/sp|Q8IYM9|TRI22_HUMAN	306062	2592.09	4.94906e-09	2592.09	0	3.18968e-08
3042_RPKNLMQTL_2_run0	1/sp|Q9Y2D5|AKAP2_HUMAN	219599	2564.9	4.94906e-09	2564.9	0	3.18872e-08
2133_GPNGGIVTSL_2_run0	1/sp|Q9HCN4|GPN1_HUMAN	231921	3504.58	4.95225e-09	3504.58	0	3.19879e-08
3631_SPRPPAEGF_2_run0	1/sp|Q9BWN1|PRR14_HUMAN	320289	2220.72	4.96641e-09	2220.72	0	3.22528e-08
442_GLMDNEIKV_2_run0	1/sp|O14763|TR10B_HUMAN	58021	3623.89	4.97098e-09	3623.89	0	3.22957e-08
1322_TLWVDPYEV_2_run0	1/sp|P62324|BTG1_HUMAN	342760	5175.99	4.98098e-09	5175.99	0	3.23321e-08
1580_YMAELIERL_2_run0	1/sp|O75496|GEMI_HUMAN	111718	4765.66	4.98298e-09	4765.66	0	3.23996e-08
794_KLWQTPLHV_2_run0	1/sp|Q8NB46|ANR52_HUMAN	60955	3631	4.99446e-09	3631	0	3.24852e-08
809_KLYQHEINL_2_run0	1/sp|Q03701|CEBPZ_HUMAN	43128	2691.25	4.99981e-09	2691.25	0	3.25188e-08
2218_IARNLTQQL_2_run0	1/sp|Q99541|PLIN2_HUMAN	129416	2599.43	5.00798e-09	2599.43	0	3.26041e-08
3514_SPMSIPTNTM_2_run0	1/sp|Q86X55|CARM1_HUMAN	49549	3532.02	5.0263e-09	3532.02	0	3.26903e-08
1584_YMNHIMVSV_2_run0	1/sp|P41212|ETV6_HUMAN	69457	3631.78	5.03136e-09	3631.78	0	3.28601e-08
2307_KAASVRPVL_2_run0	1/sp|Q9H269|VPS16_HUMAN	279807	1802.8	5.03452e-09	1802.8	0	3.32104e-08
1350_VLAHTILGV_2_run0	1/sp|Q9NUQ7|UFSP2_HUMAN	91761	3786.88	5.04013e-09	3786.88	0	3.33613e-08
90_ALPEDLVEV_2_run0	2/sp|P13797|PLST_HUMAN/sp|P13796|PLSL_HUMAN	89906	4628.93	5.04685e-09	4628.93	0	3.33641e-08
752_KLNVAPLAV_2_run0	1/sp|Q6P582|MZT2A_HUMAN	163280	3594.93	5.04729e-09	3594.93	0	3.38102e-08
3907_VPNQKRLTL_2_run0	1/sp|O60488|ACSL4_HUMAN	658896	2010.26	5.05611e-09	2010.26	0	3.39708e-08
512_HLLSDELLL_2_run0	1/sp|Q9UKT7|FBXL3_HUMAN	71727	4923.55	5.05711e-09	4923.55	0	3.44521e-08
1653_APAPPSKVI_2_run0	1/sp|Q7Z5K2|WAPL_HUMAN	91699	2231.54	5.06599e-09	2231.54	0	3.47138e-08
1701_APEEHPVL_2_run0	1/sp|P60709|ACTB_HUMAN	183614	2033.23	5.07588e-09	2033.23	0	3.4809e-08
3868_TVRAVIATL_2_run0	1/sp|Q8N201|INT1_HUMAN	193119	3596.65	5.08355e-09	3596.65	0	3.48507e-08
969_MLLATLLLLLL_3_run0	1/sp|Q7Z4F1|LRP10_HUMAN	3026500	4222.73	5.10492e-09	4222.73	0	3.50682e-08
1546_YLPYPIHQV_2_run0	1/sp|P49760|CLK2_HUMAN	140579	3721.01	5.11329e-09	3721.01	0	3.51496e-08
2449_KPRDQVVAL_2_run0	1/sp|Q9Y6N7|ROBO1_HUMAN	119490	1997.33	5.13302e-09	1997.33	0	3.51503e-08
3653_SPRTESQSL_2_run0	1/sp|Q9C0A6|SETD5_HUMAN	91370	1206.44	5.13654e-09	1206.44	0	3.5196e-08
1072_RLINQVLEL_2_run0	1/sp|Q9UIL1|SCOC_HUMAN	172099	4551.9	5.15652e-09	4551.9	0	3.52009e-08
940_LLYDLADQLHA_2_run0	1/sp|P13804|ETFA_HUMAN	128001	4664.15	5.17203e-09	4664.15	0	3.52155e-08
997_NLMDDIERA_2_run0	1/sp|P50990|TCPQ_HUMAN	89037	3985.87	5.17945e-09	3985.87	0	3.52254e-08
3748_SVKPASSSF_2_run0	1/sp|Q9Y4W2|LAS1L_HUMAN	56275	1618.4	5.17945e-09	1618.4	0	3.53038e-08
886_LLGPRLVLA_2_run0	1/sp|P49755|TMEDA_HUMAN	186903	4322.65	5.18453e-09	4322.65	0	3.54493e-08
2471_KPRPPLHLL_2_run0	1/sp|Q8N4T4|ARG39_HUMAN	187452	2507.32	5.19894e-09	2507.32	0	3.55562e-08
3322_RVQEPGAVL_2_run0	1/sp|Q9NYB0|TE2IP_HUMAN	301094	2394	5.2165e-09	2394	0	3.56246e-08
91_ALPEIFTEL_2_run0	1/sp|Q2VIR3|IF2GL_HUMAN	44393	6071.74	5.21762e-09	6071.74	0	3.58813e-08
1223_SLLPPDALVGL_2_run0	1/sp|Q15437|SC23B_HUMAN	464552	5925.48	5.21762e-09	5925.48	0	3.62731e-08
672_KLGSVPVTV_2_run0	1/sp|Q9Y4C2|F115A_HUMAN	334631	3099.73	5.22311e-09	3099.73	0	3.63611e-08
2683_LPSTLRTLEL_2_run0	1/sp|Q9NXK8|FXL12_HUMAN	50270	4448.14	5.22798e-09	4448.14	0	3.645e-08
1189_SLHPDLIYNV_2_run0	1/sp|Q9BR76|COR1B_HUMAN	45669	4084.51	5.23732e-09	4084.51	0	3.64832e-08
3964_WPKDVGIVAL_2_run0	1/sp|Q01581|HMCS1_HUMAN	641922	4815.3	5.24722e-09	4815.3	0	3.64939e-08
2738_MPRNGTGVLIL_2_run0	1/sp|Q9NVP1|DDX18_HUMAN	136945	4046.66	5.24767e-09	4046.66	0	3.688e-08
1863_APRKKSPDL_2_run0	1/sp|Q9BT25|HAUS8_HUMAN	51925	696.584	5.25397e-09	696.584	0	3.68843e-08
185_FIWENIHTL_2_run0	1/sp|Q03001|DYST_HUMAN	157987	5025.8	5.25526e-09	5025.8	0	3.70405e-08
1387_VLLGKVYVV_2_run0	1/sp|Q6TFL4|KLH24_HUMAN	553351	4139.22	5.2656e-09	4139.22	0	3.71858e-08
1794_APMIKKIAF_2_run0	1/sp|Q5UIP0|RIF1_HUMAN	122985	3240.74	5.28301e-09	3240.74	0	3.72478e-08
1798_APNAGSRMTQTV_2_run0	1/sp|P51659|DHB4_HUMAN	37961	1813.31	5.30047e-09	1813.31	0	3.73204e-08
1197_SLIGHLQTL_2_run0	1/sp|Q16690|DUS5_HUMAN	216449	4042.2	5.31038e-09	4042.2	0	3.74099e-08
1963_APSLVAPAL_2_run0	1/sp|Q15691|MARE1_HUMAN	366862	4156.37	5.32182e-09	4156.37	0	3.74463e-08
3949_VPSKPPMSL_2_run0	1/sp|Q6AI12|ANR40_HUMAN	1312170	2964.09	5.33781e-09	2964.09	0	3.75448e-08
385_GLAKAVASV_2_run0	1/sp|P57678|GEMI4_HUMAN	146581	2334.03	5.34844e-09	2334.03	0	3.761e-08
306_FLSDGTIISV_2_run0	1/sp|Q969X6|CIR1A_HUMAN	26487	4880.26	5.36365e-09	4880.26	0	3.76142e-08
2737_MPRKITEVL_2_run0	1/sp|Q9BX10|GTPB2_HUMAN	146702	3014.52	5.37325e-09	3014.52	0	3.77265e-08
2817_QPITPGPSI_2_run0	1/sp|O60341|KDM1A_HUMAN	509052	3105.79	5.38486e-09	3105.79	0	3.79171e-08
2404_KPKSVSKKL_2_run0	1/sp|Q8IYM9|TRI22_HUMAN	48722	542.676	5.39842e-09	542.676	0	3.79399e-08
27_ALDPLADKILI_2_run0	1/sp|Q9UJA2|CRLS1_HUMAN	23663	5244.32	5.42299e-09	5244.32	0	3.79678e-08
2639_LPRGSSPSVL_2_run0	1/sp|Q9GZN2|TGIF2_HUMAN	2036850	2496.54	5.42813e-09	2496.54	0	3.83599e-08
3285_RPWLRPAAL_2_run0	1/sp|Q8N4S7|PAQR4_HUMAN	211977	3216.13	5.43985e-09	3216.13	0	3.85316e-08
878_LLDVPTAAV_2_run0	1/sp|P13284|GILT_HUMAN	378272	4157.23	5.45907e-09	4157.23	0	3.86673e-08
3603_SPRKDGLVSL_2_run0	1/sp|P51570|GALK1_HUMAN	167373	2407.68	5.46011e-09	2407.68	0	3.86885e-08
1930_APRTVLLLL_2_run0	23/sp|Q31610|1B81_HUMAN/sp|P30498|1B78_HUMAN/sp|Q31612|1B73_HUMAN/sp|Q29836|1B67_HUMAN/sp|P10319|1B58_HUMAN/sp|P18465|1B57_HUMAN/sp|P30491|1B53_HUMAN/sp|P30490|1B52_HUMAN/sp|P18464|1B51_HUMAN/sp|P30488|1B50_HUMAN/sp|P30487|1B49_HUMAN/sp|P30486|1B48_HUMAN/sp|P30484|1B46_HUMAN/sp|P30483|1B45_HUMAN/sp|P30480|1B42_HUMAN/sp|P30479|1B41_HUMAN/sp|P30475|1B39_HUMAN/sp|Q95365|1B38_HUMAN/sp|P30685|1B35_HUM…	2293530	5185.89	5.47236e-09	5185.89	0	3.88799e-08
2725_MPQKERESI_2_run0	1/sp|P38919|IF4A3_HUMAN	110971	1241.88	5.48443e-09	1241.88	0	3.92058e-08
2294_IPTSARSML_2_run0	1/sp|Q8WXI9|P66B_HUMAN	909099	2849.63	5.49519e-09	2849.63	0	3.93071e-08
1927_APRTVALTAL_2_run0	1/sp|P04440|DPB1_HUMAN	3492480	3441.16	5.49848e-09	3441.16	0	3.96129e-08
2860_RPAAIPIEI_2_run0	1/sp|Q9Y2H1|ST38L_HUMAN	450364	4067.58	5.51936e-09	4067.58	0	3.96427e-08
937_LLWGNLPEI_2_run0	1/sp|Q5TYM5|FA72A_HUMAN	56241	6200.53	5.53174e-09	6200.53	0	3.96952e-08
2767_NPKNPGLWL_2_run0	1/sp|O94906|PRP6_HUMAN	158607	3979.91	5.54361e-09	3979.91	0	3.97054e-08
2305_IVRKLVTAL_2_run0	1/sp|Q8TEV9|SMCR8_HUMAN	131964	2705.42	5.54908e-09	2705.42	0	3.98454e-08
1822_APRAGEQGEAM_2_run0	1/sp|Q5JSZ5|PRC2B_HUMAN	159389	1190.22	5.56775e-09	1190.22	0	3.98639e-08
2546_KVRGISEVL_2_run0	1/sp|O95140|MFN2_HUMAN	207211	2605.67	5.57071e-09	2605.67	0	4.01745e-08
1902_APRPVDEPAM_2_run0	1/sp|Q9Y2X0|MED16_HUMAN	58374	2139.45	5.58308e-09	2139.45	0	4.02058e-08
882_LLFEGEKITI_2_run0	1/sp|Q9GZM3|RPB1B_HUMAN	27432	4949.86	5.61059e-09	4949.86	0	4.0712e-08
1165_SLAADIPRL_2_run0	1/sp|Q8N0X4|CLYBL_HUMAN	159151	4242.36	5.61234e-09	4242.36	0	4.0741e-08
3297_RPYLSAVRATL_3_run0	1/sp|P59998|ARPC4_HUMAN	100561	3251.85	5.62604e-09	3251.85	0	4.10654e-08
1848_APRGTGIVSA_2_run0	1/sp|P15880|RS2_HUMAN	824482	1688.83	5.64365e-09	1688.83	0	4.12919e-08
3166_RPRGFGFITF_2_run0	1/sp|Q96EP5|DAZP1_HUMAN	51478	4712.92	5.65499e-09	4712.92	0	4.13974e-08
2781_NPRKHITSL_2_run0	1/sp|Q6P1K8|T2H2L_HUMAN	205073	997.843	5.66469e-09	997.843	0	4.15024e-08
3800_TPLSSTVTL_2_run0	1/sp|P12004|PCNA_HUMAN	156755	3766.66	5.66525e-09	3766.66	0	4.1577e-08
3901_VPLAQAQAL_2_run0	1/sp|Q96C01|F136A_HUMAN	74276	3266.44	5.66832e-09	3266.44	0	4.15977e-08
3395_SPAVERLISSL_2_run0	1/sp|Q9BQ52|RNZ2_HUMAN	724537	5053.33	5.67252e-09	5053.33	0	4.16607e-08
708_KLLDIRSYL_2_run0	1/sp|P51665|PSMD7_HUMAN	131452	4653	5.6821e-09	4653	0	4.19389e-08
2600_LPKTTALEL_2_run0	1/sp|P18583|SON_HUMAN	323328	3568.79	5.70231e-09	3568.79	0	4.20629e-08
2401_KPKSAPWNSF_2_run0	1/sp|Q16637|SMN_HUMAN	43980	2814.51	5.72155e-09	2814.51	0	4.21066e-08
2895_RPAPLPAAVV_2_run0	1/sp|Q6ZRI6|CO039_HUMAN	116883	3171.76	5.73328e-09	3171.76	0	4.26489e-08
3578_SPRDSPAVSL_2_run0	1/sp|Q14687|GSE1_HUMAN	865424	2434.31	5.74865e-09	2434.31	0	4.26651e-08
1514_YLIPDIDLKL_2_run0	1/sp|Q92922|SMRC1_HUMAN	71182	5830.57	5.75696e-09	5830.57	0	4.26811e-08
963_MLFGHPLLV_2_run0	1/sp|P51784|UBP11_HUMAN	241372	5071.02	5.76585e-09	5071.02	0	4.2921e-08
1686_APAYLPRSLAIL_2_run0	1/sp|Q8IW35|CEP97_HUMAN	29486	5176.81	5.78977e-09	5176.81	0	4.29432e-08
2579_LPFLRITSL_2_run0	1/sp|Q6ZT12|UBR3_HUMAN	115091	5435.42	5.78977e-09	5435.42	0	4.3192e-08
1656_APAPRPSL_2_run0	1/sp|Q92620|PRP16_HUMAN	410557	1903.31	5.80142e-09	1903.31	0	4.34227e-08
3861_TPSSSRLEL_2_run0	1/sp|Q9C0C7|AMRA1_HUMAN	431751	2527.65	5.81074e-09	2527.65	0	4.34645e-08
2919_RPDDRSQGAII_2_run0	1/sp|Q04637|IF4G1_HUMAN	198292	1811.89	5.83276e-09	1811.89	0	4.36246e-08
361_FVHDLVLYL_2_run0	1/sp|Q00610|CLH1_HUMAN	210604	5437.7	5.8396e-09	5437.7	0	4.37384e-08
3403_SPDLRLTWL_2_run0	1/sp|Q96HP0|DOCK6_HUMAN	26584	5255.17	5.84441e-09	5255.17	0	4.37466e-08
1826_APRALLQDVL_2_run0	1/sp|Q8NCH0|CHSTE_HUMAN	68259	4475.35	5.86296e-09	4475.35	0	4.38265e-08
1517_YLISQVEGHQV_2_run0	1/sp|Q9Y3C4|TPRKB_HUMAN	40141	3342.66	5.86915e-09	3342.66	0	4.38315e-08
302_FLQEGDLISA_2_run0	1/sp|Q13868|EXOS2_HUMAN	82147	4246.71	5.8806e-09	4246.71	0	4.39018e-08
1463_YAYDGKDYIAL_2_run0	1/sp|P01892|1A02_HUMAN	81422	3981.48	5.88672e-09	3981.48	0	4.39221e-08
2839_QPVAGRPSL_2_run0	1/sp|Q9BYT8|NEUL_HUMAN	164013	2019.24	5.89906e-09	2019.24	0	4.41168e-08
488_GMAERIPEL_2_run0	1/sp|O95573|ACSL3_HUMAN	308359	3664.48	5.92451e-09	3664.48	0	4.4202e-08
2640_LPRHHPLVL_2_run0	1/sp|O75164|KDM4A_HUMAN	78901	2084.49	5.94256e-09	2084.49	0	4.45758e-08
2319_KIRTVQDAL_2_run0	1/sp|Q14694|UBP10_HUMAN	19886	2116.03	5.94611e-09	2116.03	0	4.4615e-08
2194_HPRDPNLLL_2_run0	1/sp|O75530|EED_HUMAN	1013590	2760.44	5.949e-09	2760.44	0	4.49005e-08
3011_RPISDFLTL_2_run0	1/sp|Q9UK73|FEM1B_HUMAN	455078	4946.11	5.95256e-09	4946.11	0	4.52369e-08
3513_SPMSDVVSREL_2_run0	1/sp|Q15051|IQCB1_HUMAN	65078	3776.55	5.96714e-09	3776.55	0	4.5366e-08
1495_YLFGERLL_2_run0	1/sp|Q9BYG3|MK67I_HUMAN	324917	4818.95	5.96948e-09	4818.95	0	4.5592e-08
3910_VPPPPHRPL_2_run0	1/sp|Q9Y520|PRC2C_HUMAN	170276	1758	5.98274e-09	1758	0	4.57035e-08
1723_APGLRLVL_2_run0	1/sp|Q9P2K6|KLH42_HUMAN	49912	4365.47	5.9973e-09	4365.47	0	4.60199e-08
3047_RPKPSSSPVIF_2_run0	1/sp|Q15366|PCBP2_HUMAN	420720	2610.96	6.01765e-09	2610.96	0	4.60745e-08
1538_YLNDLIHSV_2_run0	1/sp|O43572|AKA10_HUMAN	93252	4163.35	6.0291e-09	4163.35	0	4.61671e-08
478_GLYDSQNPPTV_2_run0	1/sp|Q96RU3|FNBP1_HUMAN	85603	3195.63	6.06689e-09	3195.63	0	4.61765e-08
3404_SPDPHKGLVLL_2_run0	1/sp|P57737|CORO7_HUMAN	118715	3502.58	6.09536e-09	3502.58	0	4.62976e-08
38_ALFKAWAL_2_run0	1/sp|Q15306|IRF4_HUMAN	73785	5027.99	6.12185e-09	5027.99	0	4.64126e-08
3494_SPLPAGNAL_2_run0	1/sp|Q86SX3|CN080_HUMAN	130744	3194.73	6.14251e-09	3194.73	0	4.64373e-08
1778_APLLKKQTL_2_run0	1/sp|P28715|ERCC5_HUMAN	28539	2006.19	6.16263e-09	2006.19	0	4.64515e-08
2261_IPQKQREITL_2_run0	1/sp|Q9NR30|DDX21_HUMAN	226547	2222.41	6.17727e-09	2222.41	0	4.68348e-08
2555_LPAIGTGNAK_2_run0	1/sp|Q460N5|PAR14_HUMAN	306085	2747.42	6.18174e-09	2747.42	0	4.69107e-08
2189_HPNSNLLDL_2_run0	1/sp|P63010|AP2B1_HUMAN	205537	3689.07	6.19269e-09	3689.07	0	4.71896e-08
1568_YLTPLILTL_2_run0	1/sp|Q9NX61|T161A_HUMAN	89310	6612.76	6.21275e-09	6612.76	0	4.74525e-08
508_HLINYIIFL_2_run0	1/sp|Q5BJD5|TM41B_HUMAN	76549	6287.85	6.21275e-09	6287.85	0	4.76365e-08
616_IVLPAGALHQV_2_run0	1/sp|Q15652|JHD2C_HUMAN	82072	3933.8	6.21571e-09	3933.8	0	4.76482e-08
4004_YPSLPTPLL_2_run0	1/sp|Q96HA1|P121A_HUMAN	70430	5448.2	6.24589e-09	5448.2	0	4.76999e-08
2719_MPKLRVLEL_2_run0	1/sp|Q9NXK8|FXL12_HUMAN	99092	4264.5	6.2526e-09	4264.5	0	4.7838e-08
3118_RPQEVPAEAL_2_run0	1/sp|Q9Y2I1|NISCH_HUMAN	62324	2518.58	6.26346e-09	2518.58	0	4.8043e-08
1114_RLSDVQIYV_2_run0	1/sp|P09913|IFIT2_HUMAN	230224	3764.46	6.27573e-09	3764.46	0	4.80497e-08
4005_YPSRAVITTM_2_run0	1/sp|Q06136|KDSR_HUMAN	31034	2976.42	6.29194e-09	2976.42	0	4.80726e-08
1641_APAPAAHVA_2_run0	1/sp|P16989|YBOX3_HUMAN	338016	1209.77	6.31956e-09	1209.77	0	4.83255e-08
1233_SLMDHTIPEV_2_run0	1/sp|O00560|SDCB1_HUMAN	289608	3928.42	6.36398e-09	3928.42	0	4.83971e-08
3769_TPAPVPTSL_2_run0	1/sp|Q9H7N4|SFR19_HUMAN	552202	3389.05	6.37465e-09	3389.05	0	4.84397e-08
1603_AARAIISEL_2_run0	1/sp|P78344|IF4G2_HUMAN	332325	3457.59	6.37643e-09	3457.59	0	4.8561e-08
1219_SLLHLGALYGI_2_run0	1/sp|O00767|ACOD_HUMAN	18325	5536.06	6.38956e-09	5536.06	0	4.85913e-08
1153_SIIGRLLEV_2_run0	1/sp|P62136|PP1A_HUMAN	2578070	5261.82	6.39096e-09	5261.82	0	4.90629e-08
3543_SPQAPTHFL_2_run0	1/sp|P49773|HINT1_HUMAN	156949	3130.66	6.4031e-09	3130.66	0	4.90964e-08
1397_VLMEKPDVV_2_run0	1/sp|Q9NY93|DDX56_HUMAN	113738	2999.49	6.41929e-09	2999.49	0	4.91893e-08
829_KQISQAYEV_2_run0	1/sp|P31689|DNJA1_HUMAN	63377	2142.69	6.42378e-09	2142.69	0	4.92342e-08
696_KLILLITQV_2_run0	1/sp|Q15061|WDR43_HUMAN	75813	5146.85	6.43937e-09	5146.85	0	4.94038e-08
2521_KPVAPSNVL_2_run0	1/sp|Q9NVU0|RPC5_HUMAN	161257	2437.39	6.48019e-09	2437.39	0	4.97956e-08
1154_SIIQRLLEV_2_run0	1/sp|P36873|PP1G_HUMAN	104858	5449.15	6.48951e-09	5449.15	0	4.97975e-08
2049_EPRPPHGEL_2_run0	1/sp|P04818|TYSY_HUMAN	211567	1653.8	6.50009e-09	1653.8	0	5.03151e-08
3944_VPRVLGSSV_2_run0	1/sp|Q07021|C1QBP_HUMAN	284363	2718.95	6.52346e-09	2718.95	0	5.05129e-08
3613_SPRLPVGGF_2_run0	1/sp|Q14669|TRIPC_HUMAN	1010820	3667.57	6.52864e-09	3667.57	0	5.07416e-08
742_KLMDQLEAL_2_run0	1/sp|Q9NP79|VTA1_HUMAN	194059	4154.25	6.53026e-09	4154.25	0	5.08884e-08
344_FMFDEKLVTV_2_run0	1/sp|O00743|PPP6_HUMAN	39423	5026.4	6.55385e-09	5026.4	0	5.09312e-08
80_ALMDQVHHM_2_run0	1/sp|Q96BU1|S1PBP_HUMAN	59820	2440.74	6.5731e-09	2440.74	0	5.09571e-08
953_LTIEDGIFEV_2_run0	1/sp|P54652|HSP72_HUMAN	24875	5610.2	6.57663e-09	5610.2	0	5.1053e-08
3248_RPSQNNTIGL_2_run0	1/sp|Q9H0H0|INT2_HUMAN	49944	2177.29	6.58469e-09	2177.29	0	5.11098e-08
1439_VMDSKIVQV_2_run0	1/sp|O15131|IMA6_HUMAN	460680	2906.86	6.5886e-09	2906.86	0	5.11379e-08
3804_TPMHPPSSL_2_run0	1/sp|P23771|GATA3_HUMAN	86930	2514.64	6.59558e-09	2514.64	0	5.13281e-08
1097_RLMNETTAV_2_run0	1/sp|O95757|HS74L_HUMAN	152069	2124.93	6.60979e-09	2124.93	0	5.13401e-08
1437_VM(UniMod:35)APRALL_2_run0	1/sp|P10321|1C07_HUMAN	107915	3051.24	6.61565e-09	3051.24	0	5.15788e-08
3117_RPQDKFLVL_2_run0	1/sp|Q9P0J1|PDP1_HUMAN	126922	3619.49	6.63039e-09	3619.49	0	5.16957e-08
3793_TPKKKKKRFSF_3_run0	1/sp|P29966|MARCS_HUMAN	14193	737.177	6.63417e-09	737.177	0	5.17038e-08
39_ALFPAPLAQI_2_run0	1/sp|Q8ND24|RN214_HUMAN	35359	5857.7	6.66558e-09	5857.7	0	5.17472e-08
134_ALYPNVVQV_2_run0	1/sp|Q6P158|DHX57_HUMAN	123754	4252.79	6.67688e-09	4252.79	0	5.22024e-08
1872_APRLETKSL_2_run0	1/sp|Q6P6C2|ALKB5_HUMAN	205511	1900.15	6.69243e-09	1900.15	0	5.22513e-08
3616_SPRLSQTFLQL_2_run0	1/sp|Q92608|DOCK2_HUMAN	119928	4701.14	6.70893e-09	4701.14	0	5.24303e-08
3825_TPRKDFTQL_2_run0	1/sp|O15264|MK13_HUMAN	92250	2076.31	6.71653e-09	2076.31	0	5.29699e-08
3124_RPQLKGVVL_2_run0	1/sp|O15235|RT12_HUMAN	304326	2744.93	6.72582e-09	2744.93	0	5.3678e-08
3501_SPLTKSISL_2_run0	1/sp|Q12802|AKP13_HUMAN	478303	3377.53	6.73554e-09	3377.53	0	5.38292e-08
1893_APRPGLLSL_2_run0	1/sp|O95785|WIZ_HUMAN	579222	3886.03	6.74323e-09	3886.03	0	5.38476e-08
2327_KPAGPPGILAL_2_run0	1/sp|P35579|MYH9_HUMAN	2033020	4187.04	6.75113e-09	4187.04	0	5.42175e-08
3770_TPASSRAQTL_2_run0	1/sp|Q01082|SPTB2_HUMAN	62940	1340.62	6.75482e-09	1340.62	0	5.42388e-08
1366_VLHKELPEV_2_run0	1/sp|Q99685|MGLL_HUMAN	39292	2361.46	6.7794e-09	2361.46	0	5.43595e-08
3405_SPDPLRPLEFL_2_run0	1/sp|Q4VC44|FWCH1_HUMAN	48979	5703.6	6.78105e-09	5703.6	0	5.44465e-08
714_KLLDPEDVAVQL_2_run0	1/sp|P46939|UTRO_HUMAN	444539	4732.37	6.79302e-09	4732.37	0	5.45137e-08
3027_RPKENSMSTL_2_run0	1/sp|Q9H992|MARH7_HUMAN	39609	1367.25	6.80296e-09	1367.25	0	5.45311e-08
690_KLIEELETL_2_run0	1/sp|Q03060|CREM_HUMAN	305198	4367.47	6.80586e-09	4367.47	0	5.45361e-08
1186_SLFGGSVKL_2_run0	1/sp|Q8WUM4|PDC6I_HUMAN	336030	4192.24	6.81378e-09	4192.24	0	5.47396e-08
3740_SPYFQRPLAL_2_run0	1/sp|P32929|CGL_HUMAN	36265	4172.97	6.82173e-09	4172.97	0	5.49745e-08
2679_LPSRPPSQL_2_run0	1/sp|Q96IT1|ZN496_HUMAN	208920	2567.97	6.82296e-09	2567.97	0	5.51286e-08
2692_LPWPARPAL_2_run0	1/sp|Q86YV9|HPS6_HUMAN	1054260	4273.84	6.82454e-09	4273.84	0	5.52972e-08
2810_QPFGGGSHM(UniMod:35)_2_run0	1/sp|Q00653|NFKB2_HUMAN	35498	1161.94	6.83212e-09	1161.94	0	5.55396e-08
3546_SPQDKRTLL_2_run0	1/sp|Q8TC07|TBC15_HUMAN	191222	1708.14	6.83548e-09	1708.14	0	5.6135e-08
1047_RLAPAQWFL_2_run0	1/sp|O95977|S1PR4_HUMAN	37411	5163.18	6.83548e-09	5163.18	0	5.56206e-08
3080_RPMGAGEAL_2_run0	1/sp|Q12906|ILF3_HUMAN	846916	1887.12	6.8434e-09	1887.12	0	5.6172e-08
2042_AVRLITSSL_2_run0	1/sp|O76031|CLPX_HUMAN	218076	3583.77	6.85083e-09	3583.77	0	5.62868e-08
1472_YILAGVENSK_2_run0	1/iRT|iRT_Biognosys|iRT_Biognosys	644043	2696.63	6.8586e-09	2696.63	0	5.63242e-08
3782_TPFGGRLLVL_2_run0	1/sp|Q4VC44|FWCH1_HUMAN	231601	5122.92	6.87744e-09	5122.92	0	5.63362e-08
2554_LPAGVRVPL_2_run0	1/sp|Q9H6R4|NOL6_HUMAN	94421	3864.37	6.89318e-09	3864.37	0	5.6772e-08
1858_APRIITGPAPVL_2_run0	1/sp|Q96PU8|QKI_HUMAN	398147	4007	6.90969e-09	4007	0	5.68111e-08
1796_APMSAAHQL_2_run0	1/sp|P54259|ATN1_HUMAN	119234	1887.18	6.90969e-09	1887.18	0	5.67836e-08
2877_RPAKKHLEL_2_run0	1/sp|Q8TED0|UTP15_HUMAN	29441	824.482	6.9169e-09	824.482	0	5.68774e-08
168_FIFSDTHEL_2_run0	1/sp|Q9UKK3|PARP4_HUMAN	62952	4156.32	6.93827e-09	4156.32	0	5.71682e-08
2061_FPIEVRHYL_2_run0	1/sp|P42229|STA5A_HUMAN	64364	3920.1	6.96018e-09	3920.1	0	5.72993e-08
1705_APELLRALL_2_run0	1/sp|Q00653|NFKB2_HUMAN	415036	5269.23	6.96367e-09	5269.23	0	5.73261e-08
1337_TVLPFVSTV_2_run0	1/sp|P26010|ITB7_HUMAN	101630	5233.84	6.96593e-09	5233.84	0	5.73496e-08
1009_QLAIPVSSL_2_run0	1/sp|P15260|INGR1_HUMAN	2502470	3362.42	6.97264e-09	3362.42	0	5.76592e-08
2016_APVPTTTLVL_2_run0	1/sp|P18583|SON_HUMAN	71779	4568.48	6.98833e-09	4568.48	0	5.77156e-08
1731_APGVGKSAL_2_run0	1/sp|P55042|RAD_HUMAN	109068	1741.17	7.00401e-09	1741.17	0	5.81798e-08
3952_VPSRSSSAL_2_run0	1/sp|Q63HN8|RN213_HUMAN	64583	1345.81	7.00978e-09	1345.81	0	5.82678e-08
1680_APASRLLAL_2_run0	1/sp|Q96S16|JMJD8_HUMAN	260597	3753.45	7.01866e-09	3753.45	0	5.83477e-08
1417_VLTGLSIRL_2_run0	1/sp|Q6SPF0|SAMD1_HUMAN	45901	4700.01	7.02123e-09	4700.01	0	5.84981e-08
814_KMADIEYRL_2_run0	1/sp|P40937|RFC5_HUMAN	101473	3171.25	7.02317e-09	3171.25	0	5.85787e-08
501_HIIENIVAV_2_run0	1/sp|O76021|RL1D1_HUMAN	1800330	3744.34	7.03713e-09	3744.34	0	5.91104e-08
876_LLDRFLATV_2_run0	1/sp|Q14094|CCNI_HUMAN	593129	4723.06	7.03713e-09	4723.06	0	5.89523e-08
2316_KIRNFVVVF_2_run0	1/sp|Q9BYX4|IFIH1_HUMAN	932562	4193.24	7.04258e-09	4193.24	0	5.95045e-08
335_FLYPFLHTV_2_run0	1/sp|Q92600|RCD1_HUMAN	37920	5335.61	7.05464e-09	5335.61	0	5.95932e-08
1838_APREKIVILL_2_run0	1/sp|Q9Y5S2|MRCKB_HUMAN	34998	3938.69	7.06117e-09	3938.69	0	5.95999e-08
389_GLAQVITAV_2_run0	1/sp|Q9UKY1|ZHX1_HUMAN	25583	4644.63	7.06279e-09	4644.63	0	5.98489e-08
399_GLDVDGIYRV_2_run0	1/sp|Q53QZ3|RHG15_HUMAN	63517	3998.73	7.06419e-09	3998.73	0	6.00798e-08
3146_RPRDDSFHVIL_3_run0	1/sp|Q8TBB1|LNX1_HUMAN	154336	3260.93	7.07204e-09	3260.93	0	6.02673e-08
1404_VLMQDSRLYL_2_run0	1/sp|P06493|CDK1_HUMAN	23625	4215.12	7.09334e-09	4215.12	0	6.03943e-08
836_KVAPAPAVV_2_run0	1/sp|P62424|RL7A_HUMAN	616350	2064.02	7.11018e-09	2064.02	0	6.06023e-08
1931_APRTVLLLLS_2_run0	15/sp|Q31612|1B73_HUMAN/sp|Q29836|1B67_HUMAN/sp|P30488|1B50_HUMAN/sp|P30487|1B49_HUMAN/sp|P30486|1B48_HUMAN/sp|P30484|1B46_HUMAN/sp|P30483|1B45_HUMAN/sp|P30480|1B42_HUMAN/sp|P30479|1B41_HUMAN/sp|P30475|1B39_HUMAN/sp|Q95365|1B38_HUMAN/sp|P30464|1B15_HUMAN/sp|P30462|1B14_HUMAN/sp|P30460|1B08_HUMAN/sp|P01889|1B07_HUMAN	70964	4910.85	7.12738e-09	4910.85	0	6.07299e-08
279_FLLPTGVYL_2_run0	1/sp|O00329|PK3CD_HUMAN	91287	6205.95	7.12929e-09	6205.95	0	6.08021e-08
3572_SPRASMGVL_2_run0	1/sp|Q12888|TP53B_HUMAN	300194	2535.25	7.13778e-09	2535.25	0	6.09382e-08
3644_SPRQQGGGM_2_run0	1/sp|Q8NFD5|ARI1B_HUMAN	60959	646.951	7.15163e-09	646.951	0	6.11692e-08
606_ILYDKLEKI_2_run0	1/sp|Q99832|TCPH_HUMAN	36570	3394.3	7.1705e-09	3394.3	0	6.11822e-08
2467_KPRNVVFVDM_2_run0	1/sp|P34932|HSP74_HUMAN	99052	3184.8	7.17371e-09	3184.8	0	6.14418e-08
624_KIGSIIFQV_2_run0	1/sp|Q460N5|PAR14_HUMAN	158464	4641.33	7.18746e-09	4641.33	0	6.14671e-08
1456_WLAEKLPTL_2_run0	1/sp|Q14008|CKAP5_HUMAN	272259	4743.52	7.18987e-09	4743.52	0	6.14673e-08
2655_LPRQPPMSL_2_run0	1/sp|Q13045|FLII_HUMAN	576452	3295.81	7.20227e-09	3295.81	0	6.18628e-08
3394_SPAVERLIS_2_run0	1/sp|Q9BQ52|RNZ2_HUMAN	210237	2939.68	7.20652e-09	2939.68	0	6.20032e-08
800_KLYEAVPQL_2_run0	1/sp|O00311|CDC7_HUMAN	309123	3670.76	7.21236e-09	3670.76	0	6.24223e-08
1697_APDSQRLKL_2_run0	1/sp|Q9UQE7|SMC3_HUMAN	383582	2017.2	7.21395e-09	2017.2	0	6.25778e-08
951_LMVDHVTEV_2_run0	1/sp|Q9HD15|SRA1_HUMAN	225105	3062.96	7.23524e-09	3062.96	0	6.25802e-08
1235_SLMGPVVHEV_2_run0	1/sp|O95613|PCNT_HUMAN	87657	3468.39	7.25135e-09	3468.39	0	6.27504e-08
2959_RPFLRPNII_2_run0	1/sp|Q9P2E3|ZNFX1_HUMAN	62215	3449.3	7.26556e-09	3449.3	0	6.28521e-08
827_KMWEELPEVV_2_run0	1/sp|Q02338|BDH_HUMAN	73192	4647.39	7.27744e-09	4647.39	0	6.29217e-08
3244_RPSQAAPAV_2_run0	1/sp|P40222|TXLNA_HUMAN	490215	1333.21	7.28228e-09	1333.21	0	6.31689e-08
254_FLLDGFPRTV_2_run0	1/sp|P54819|KAD2_HUMAN	436127	5121.28	7.29125e-09	5121.28	0	6.32665e-08
1933_APRTVLLLLSAA_2_run0	1/sp|P01889|1B07_HUMAN	44255	5436.35	7.31724e-09	5436.35	0	6.35037e-08
1708_APESKHKSSL_2_run0	1/sp|Q8TCJ2|STT3B_HUMAN	9936	567.807	7.32973e-09	567.807	0	6.36162e-08
3925_VPRNDSLSL_2_run0	1/sp|Q8NCD3|HJURP_HUMAN	377620	2628.1	7.3461e-09	2628.1	0	6.40833e-08
1745_APIGPHLQSM_2_run0	1/sp|Q14152|EIF3A_HUMAN	85642	2942.06	7.3461e-09	2942.06	0	6.41078e-08
1819_APQWPIIAF_2_run0	1/sp|Q96HH6|TMM19_HUMAN	73179	6272.09	7.35121e-09	6272.09	0	6.41143e-08
2038_AVRGNAAVL_2_run0	1/sp|Q9BV81|EMC6_HUMAN	620195	1786.28	7.36428e-09	1786.28	0	6.41336e-08
3610_SPRLAAQKL_2_run0	1/sp|P49454|CENPF_HUMAN	242241	1794.89	7.3744e-09	1794.89	0	6.42197e-08
947_LMDHTIPEV_2_run0	1/sp|O00560|SDCB1_HUMAN	898279	3387.95	7.39382e-09	3387.95	0	6.42784e-08
1402_VLMLQEPLL_2_run0	1/sp|P04843|RPN1_HUMAN	35894	5702.13	7.42155e-09	5702.13	0	6.43773e-08
372_GILGIQPPSV_2_run0	1/sp|Q9UPN6|SCAF8_HUMAN	93419	4909.35	7.44366e-09	4909.35	0	6.43864e-08
1054_RLFDEPQLASL_2_run0	1/sp|Q9H0C5|BTBD1_HUMAN	133917	4637.73	7.45153e-09	4637.73	0	6.45116e-08
3887_VPDTSRIYVAL_2_run0	1/sp|Q9UBK9|UXT_HUMAN	676458	4087.12	7.46132e-09	4087.12	0	6.45614e-08
453_GLSDLRLEL_2_run0	1/sp|Q96A65|EXOC4_HUMAN	44168	4869.57	7.46629e-09	4869.57	0	6.46645e-08
605_ILYDIPDIRL_2_run0	1/sp|O95363|SYFM_HUMAN	47049	5515.29	7.47679e-09	5515.29	0	6.50898e-08
3734_SPVVKGNAL_2_run0	1/sp|Q5VW36|FOCAD_HUMAN	197840	1866	7.48464e-09	1866	0	6.51042e-08
1503_YLGNINPQM_2_run0	1/sp|O15042|SR140_HUMAN	361607	3639.03	7.50463e-09	3639.03	0	6.52834e-08
1415_VLSSRLAFA_2_run0	1/sp|P79483|DRB3_HUMAN	947556	3405.82	7.50723e-09	3405.82	0	6.53411e-08
705_KLLAVIHEL_2_run0	1/sp|Q9Y620|RA54B_HUMAN	53101	3796.94	7.52881e-09	3796.94	0	6.59539e-08
3276_RPVPPPPSL_2_run0	1/sp|P13051|UNG_HUMAN	261898	2686.13	7.5441e-09	2686.13	0	6.62138e-08
3682_SPSKTRGQIQV_2_run0	1/sp|P04183|KITH_HUMAN	29518	1345.59	7.55153e-09	1345.59	0	6.63365e-08
3012_RPITDSPVL_2_run0	1/sp|Q9NZL9|MAT2B_HUMAN	1603950	2898.65	7.5538e-09	2898.65	0	6.63538e-08
2395_KPKKGGGISF_2_run0	1/sp|P55039|DRG2_HUMAN	112658	1250.92	7.56228e-09	1250.92	0	6.63947e-08
1943_APSAARELSL_2_run0	1/sp|Q9H668|STN1_HUMAN	165679	2928.11	7.58797e-09	2928.11	0	6.64085e-08
3760_TPAFPRSLL_2_run0	1/sp|Q7LBC6|KDM3B_HUMAN	207067	4299.2	7.60712e-09	4299.2	0	6.65015e-08
1460_WLVDHVYAI_2_run0	1/sp|P30153|2AAA_HUMAN	101957	4814.49	7.61681e-09	4814.49	0	6.65587e-08
1861_APRKGTVWSL_2_run0	1/sp|Q8WUA4|TF3C2_HUMAN	172310	2858.97	7.62605e-09	2858.97	0	6.70078e-08
509_HLLEEPIYL_2_run0	1/sp|Q9BUB4|ADAT1_HUMAN	280191	4594.95	7.64856e-09	4594.95	0	6.72536e-08
1096_RLMNDM(UniMod:35)TAV_2_run0	1/sp|Q92598|HS105_HUMAN	58260	1976.89	7.66784e-09	1976.89	0	6.75461e-08
1108_RLQEDPPVGV_2_run0	1/sp|P63146|UBE2B_HUMAN	1732200	2597.3	7.66984e-09	2597.3	0	6.7632e-08
2675_LPSLRILYM_2_run0	1/sp|P00403|COX2_HUMAN	21437	5439.19	7.67434e-09	5439.19	0	6.80756e-08
1102_RLPEAIEEV_2_run0	1/sp|Q9UBQ7|GRHPR_HUMAN	1375200	3369.07	7.68146e-09	3369.07	0	6.81805e-08
1060_RLGEAEGLMKV_3_run0	1/sp|Q9HBR0|S38AA_HUMAN	121178	3053.62	7.68698e-09	3053.62	0	6.87885e-08
2795_NPYSRLMAL_2_run0	1/sp|Q9GZZ9|UBA5_HUMAN	23829	4167.17	7.69224e-09	4167.17	0	6.88297e-08
2083_FPRSPGQPSSL_2_run0	1/sp|Q5T011|SZT2_HUMAN	113894	2662.08	7.71341e-09	2662.08	0	6.93568e-08
1111_RLQEGDKILSV_3_run0	1/sp|P57105|SYJ2B_HUMAN	53403	2888.28	7.72546e-09	2888.28	0	6.94814e-08
1733_APHALLQAVL_2_run0	1/sp|P49327|FAS_HUMAN	102324	4385.74	7.73672e-09	4385.74	0	6.97351e-08
1793_APMGIRLSP_2_run0	1/sp|Q9NX62|IMPA3_HUMAN	116041	3382.39	7.74615e-09	3382.39	0	6.9797e-08
2745_MPSPVSPKL_2_run0	1/sp|Q9UHB7|AFF4_HUMAN	330641	3075.35	7.76258e-09	3075.35	0	6.99091e-08
718_KLLEGEESRISL_2_run0	1/sp|P08670|VIME_HUMAN	23855	3360.15	7.77652e-09	3360.15	0	7.07272e-08
3140_RPRATVMVM_2_run0	1/sp|O75787|RENR_HUMAN	71606	2152.58	7.78454e-09	2152.58	0	7.07427e-08
2230_IPDASKLQFIL_2_run0	1/sp|O75935|DCTN3_HUMAN	187186	5297.11	7.80631e-09	5297.11	0	7.09889e-08
3362_SPAIPSAPL_2_run0	1/sp|O60291|MGRN1_HUMAN	60957	3680.44	7.81363e-09	3680.44	0	7.12327e-08
2714_MPFPNIRSAEL_2_run0	1/sp|A8MPP1|D11L8_HUMAN	56112	4580.84	7.81926e-09	4580.84	0	7.1422e-08
1042_RISDVHFSV_2_run0	1/sp|O95503|CBX6_HUMAN	245961	3105.55	7.83457e-09	3105.55	0	7.14867e-08
2702_MARGAALAL_2_run0	1/sp|P14209|CD99_HUMAN	321369	2834.96	7.86153e-09	2834.96	0	7.20924e-08
60_ALLDVTPKAV_2_run0	1/sp|Q9UDY2|ZO2_HUMAN	58749	3656.86	7.87369e-09	3656.86	0	7.28394e-08
1531_YLLPYENLL_2_run0	1/sp|Q12769|NU160_HUMAN	96327	6124.54	7.89052e-09	6124.54	0	7.30918e-08
1988_APSSPRPALP_2_run0	1/sp|P05362|ICAM1_HUMAN	475669	2423.02	7.90636e-09	2423.02	0	7.32447e-08
2351_KPFDQTTISL_2_run0	1/sp|Q15417|CNN3_HUMAN	113613	3771.63	7.91961e-09	3771.63	0	7.34816e-08
2500_KPSKKKQSL_2_run0	1/sp|Q06330|SUH_HUMAN	2209	415.392	7.93418e-09	415.392	0	7.35399e-08
3842_TPSASRKSL_2_run0	1/sp|Q5SRE5|NU188_HUMAN	172290	941.01	7.94105e-09	941.01	0	7.36342e-08
3854_TPSPTRYSL_2_run0	1/sp|P49792|RBP2_HUMAN	141085	2522.32	7.94991e-09	2522.32	0	7.38959e-08
925_LLPPPPCPA_2_run0	1/sp|Q9BTY2|FUCO2_HUMAN	394048	3571.51	7.98742e-09	3571.51	0	7.39374e-08
3266_RPTLPVKSL_2_run0	1/sp|Q7Z422|SZRD1_HUMAN	256027	2688.92	8.00446e-09	2688.92	0	7.41663e-08
1650_APAPKAYVL_2_run0	1/sp|A6NDG6|PGP_HUMAN	210307	2779.02	8.01523e-09	2779.02	0	7.4293e-08
3116_RPQDGVAVL_2_run0	1/sp|O00159|MYO1C_HUMAN	1482720	2518.56	8.0372e-09	2518.56	0	7.45133e-08
3667_SPSDPSSSL_2_run0	1/sp|Q9BZ67|FRMD8_HUMAN	91741	1900.3	8.05028e-09	1900.3	0	7.4683e-08
1275_TLAEIAKVEL_2_run0	1/sp|Q15233|NONO_HUMAN	91292	4361.14	8.08202e-09	4361.14	0	7.47551e-08
2099_GPALGRSFL_2_run0	1/sp|P32970|CD70_HUMAN	1070860	3595.76	8.09698e-09	3595.76	0	7.48113e-08
448_GLMTTVHAI_2_run0	1/sp|P04406|G3P_HUMAN	149134	3464.82	8.10744e-09	3464.82	0	7.48477e-08
140_AMNARPHKV_2_run0	1/sp|P09651|ROA1_HUMAN	10565	732.232	8.11487e-09	732.232	0	7.53117e-08
2322_KPAASPLTSL_2_run0	1/sp|Q92615|LAR4B_HUMAN	190101	3129.9	8.11519e-09	3129.9	0	7.56423e-08
2650_LPRPHASIMF_2_run0	1/sp|Q08211|DHX9_HUMAN	171326	3480.14	8.12195e-09	3480.14	0	7.56721e-08
2589_LPIAASSSL_2_run0	1/sp|Q9GZS3|WDR61_HUMAN	85351	3536.11	8.13952e-09	3536.11	0	7.58315e-08
640_KIYEGQVEV_2_run0	1/sp|P46777|RL5_HUMAN	2144420	2608.63	8.1609e-09	2608.63	0	7.62953e-08
275_FLLPKVQSIQL_2_run0	1/sp|A2VDJ0|T131L_HUMAN	88822	5374.41	8.1609e-09	5374.41	0	7.60359e-08
166_FIFEKKLAQA_2_run0	1/sp|Q86XL3|ANKL2_HUMAN	25594	3153.36	8.17005e-09	3153.36	0	7.64956e-08
3076_RPLVVKTSL_2_run0	1/sp|P78345|RPP38_HUMAN	146386	2429.17	8.20267e-09	2429.17	0	7.66844e-08
3508_SPMMPRITSVF_2_run0	1/sp|Q6AHZ1|Z518A_HUMAN	136454	4908.34	8.24274e-09	4908.34	0	7.71577e-08
3451_SPGWVRLAL_2_run0	1/sp|Q9BQB6|VKOR1_HUMAN	418554	4761.42	8.24817e-09	4761.42	0	7.72123e-08
2636_LPRGMQPTEF_2_run0	1/sp|P28062|PSB8_HUMAN	518385	3321.39	8.26412e-09	3321.39	0	7.77755e-08
2614_LPNVPSIAL_2_run0	2/sp|P59074|CHM4P_HUMAN/sp|Q9H444|CHM4B_HUMAN	45392	5020.45	8.26923e-09	5020.45	0	7.80042e-08
3129_RPQPQTLQL_2_run0	1/sp|O00399|DCTN6_HUMAN	307418	2791.94	8.27308e-09	2791.94	0	7.83202e-08
2905_RPAQFLPEM_2_run0	1/sp|Q15345|LRC41_HUMAN	559916	3879.46	8.29142e-09	3879.46	0	7.86858e-08
820_KMHARDFTV_2_run0	2/sp|Q14240|IF4A2_HUMAN/sp|P60842|IF4A1_HUMAN	42156	1719.96	8.31211e-09	1719.96	0	7.87759e-08
446_GLM(UniMod:35)KKAYEL_2_run0	1/sp|Q02078|MEF2A_HUMAN	58096	1954.7	8.34636e-09	1954.7	0	7.8875e-08
1792_APLSGSKEM_2_run0	1/sp|O95391|SLU7_HUMAN	64408	1517.88	8.36082e-09	1517.88	0	8.00271e-08
2945_RPEEGKESL_2_run0	1/sp|Q5U3C3|TM164_HUMAN	55073	1053.83	8.36803e-09	1053.83	0	8.02336e-08
2106_GPAQIRAVL_2_run0	1/sp|P54802|ANAG_HUMAN	48890	3160.63	8.37883e-09	3160.63	0	8.0291e-08
1116_RLSEFIPAVF_2_run0	1/sp|Q12768|STRUM_HUMAN	37838	5444.27	8.38122e-09	5444.27	0	8.04007e-08
574_ILMGVLKEV_2_run0	1/sp|O43143|DHX15_HUMAN	111240	4504.15	8.39104e-09	4504.15	0	8.04966e-08
1126_RLWGEPVNL_2_run0	1/sp|O00507|USP9Y_HUMAN	922286	4184.4	8.4138e-09	4184.4	0	8.07089e-08
2066_FPMEIRQYL_2_run0	1/sp|P42224|STAT1_HUMAN	105138	4870.5	8.42534e-09	4870.5	0	8.0802e-08
1100_RLPDDDPTAV_2_run0	1/sp|Q9UBF2|COPG2_HUMAN	123353	2316.74	8.44084e-09	2316.74	0	8.14461e-08
432_GLLGNVAEV_2_run0	1/sp|Q7Z7L7|ZER1_HUMAN	64071	4239.47	8.45635e-09	4239.47	0	8.15498e-08
3479_SPKLPVSSL_2_run0	1/sp|Q99856|ARI3A_HUMAN	2486640	3362.42	8.46562e-09	3362.42	0	8.15519e-08
3418_SPELRSTAM_2_run0	1/sp|P42345|MTOR_HUMAN	61548	1936.29	8.47688e-09	1936.29	0	8.16056e-08
1067_RLIEQEEYL_2_run0	1/sp|Q9NTJ3|SMC4_HUMAN	87534	3342.46	8.5043e-09	3342.46	0	8.17827e-08
10_AIQDKLFQV_2_run0	1/sp|Q9BRQ6|CHCH6_HUMAN	109436	4022.01	8.50886e-09	4022.01	0	8.21103e-08
3500_SPLSAARAAL_2_run0	1/sp|Q8N5I4|DHRSX_HUMAN	245748	3316.76	8.5188e-09	3316.76	0	8.24187e-08
3941_VPRTAAGGVGTL_2_run0	1/sp|P59044|NALP6_HUMAN	105651	1482.49	8.53171e-09	1482.49	0	8.24783e-08
2721_MPKPPNLIM_2_run0	1/sp|P46100|ATRX_HUMAN	231825	3998.39	8.54684e-09	3998.39	0	8.25944e-08
386_GLAPAEVVVATV_2_run0	1/sp|Q969V6|MKL1_HUMAN	46098	4772.53	8.55317e-09	4772.53	0	8.26149e-08
258_FLLDKPQDLSI_2_run0	1/sp|Q6ZN28|MACC1_HUMAN	30565	4789.19	8.55458e-09	4789.19	0	8.27127e-08
765_KLQNIMMLL_2_run0	1/sp|Q9NRZ9|HELLS_HUMAN	107590	5617.87	8.57336e-09	5617.87	0	8.29128e-08
537_ILDDTAKNLRV_3_run0	1/sp|Q5JRA6|MIA3_HUMAN	27935	2972.48	8.58251e-09	2972.48	0	8.31269e-08
3267_RPTNANLTL_2_run0	1/sp|Q9UPP1|PHF8_HUMAN	253060	2451.13	8.58809e-09	2451.13	0	8.31416e-08
3659_SPRVPASET_2_run0	1/sp|Q9HD15|SRA1_HUMAN	161362	1267.39	8.59484e-09	1267.39	0	8.31928e-08
179_FILPSSLYL_2_run0	1/sp|Q9H2H9|S38A1_HUMAN	22186	6256.53	8.61797e-09	6256.53	0	8.34337e-08
1980_APSQQRQQI_2_run0	1/sp|Q6P2Q9|PRP8_HUMAN	198797	1039.23	8.62401e-09	1039.23	0	8.34592e-08
127_ALWDKLFNL_2_run0	1/sp|Q8WXH0|SYNE2_HUMAN	50454	6274.53	8.62416e-09	6274.53	0	8.35374e-08
2875_RPAGLQGAL_2_run0	1/sp|Q02127|PYRD_HUMAN	87191	2418.37	8.65425e-09	2418.37	0	8.37399e-08
1259_SLYSQVHQI_2_run0	1/sp|Q93074|MED12_HUMAN	99509	3102.33	8.6617e-09	3102.33	0	8.54018e-08
1436_VLYSVMTLV_2_run0	1/sp|Q9UNL2|SSRG_HUMAN	19609	5726.17	8.68109e-09	5726.17	0	8.55968e-08
180_FIMEGTLTRV_2_run0	1/sp|Q07889|SOS1_HUMAN	40052	4094.94	8.7179e-09	4094.94	0	8.56165e-08
2542_KVKEAGSSM_2_run0	1/sp|Q9Y3B9|RRP15_HUMAN	85207	624.287	8.74731e-09	624.287	0	8.5675e-08
3678_SPSINRQTSI_2_run0	1/sp|Q9UJ41|RABX5_HUMAN	43874	2016.42	8.76164e-09	2016.42	0	8.58232e-08
1136_RMFDGKFVV_2_run0	1/sp|Q8TAS1|UHMK1_HUMAN	132166	3502.33	8.78725e-09	3502.33	0	8.59167e-08
485_GLYPGLIWL_2_run0	1/sp|O14896|IRF6_HUMAN	53208	6890.18	8.8418e-09	6890.18	0	8.61972e-08
3316_RVKEIGSTM(UniMod:35)_2_run0	1/sp|O00422|SAP18_HUMAN	65809	780.781	8.84835e-09	780.781	0	8.63988e-08
2864_RPAANPIQFTL_2_run0	1/sp|P23921|RIR1_HUMAN	27223	4412.63	8.86274e-09	4412.63	0	8.64275e-08
3204_RPRPSGEEVL_2_run0	1/sp|P33992|MCM5_HUMAN	36233	1622.23	8.87043e-09	1622.23	0	8.69845e-08
2894_RPAPLPAAV_2_run0	1/sp|Q6ZRI6|CO039_HUMAN	288267	2562.97	8.89443e-09	2562.97	0	8.7377e-08
377_GLAAGGIVAV_2_run0	1/sp|Q9ULH7|MKL2_HUMAN	111628	3913.88	8.91383e-09	3913.88	0	8.74679e-08
2142_GPRAGGSVVL_2_run0	1/sp|Q9Y2E6|DTX4_HUMAN	570963	2188	8.93529e-09	2188	0	8.75474e-08
3010_RPISASVL_2_run0	1/sp|P48201|AT5G3_HUMAN	289755	2613.51	8.96009e-09	2613.51	0	8.77965e-08
775_KLVELPYTV_2_run0	1/sp|Q9NPF4|OSGEP_HUMAN	241925	4190.01	8.98437e-09	4190.01	0	8.80661e-08
2771_NPNLRKNVL_2_run0	1/sp|P23193|TCEA1_HUMAN	446442	1891.87	9.00664e-09	1891.87	0	8.81839e-08
3396_SPAVSRTQL_2_run0	1/sp|Q15149|PLEC_HUMAN	132007	1842.87	9.02219e-09	1842.87	0	8.82025e-08
2983_RPHKPGLYL_2_run0	1/sp|Q5SRI9|MANEA_HUMAN	32957	1915.01	9.0438e-09	1915.01	0	8.85947e-08
2250_IPLLGKSSL_2_run0	1/sp|Q9NYP3|DONS_HUMAN	137494	3883.21	9.05584e-09	3883.21	0	8.88204e-08
1215_SLLENLEKI_2_run0	1/sp|O60812|HNRCL_HUMAN	590276	4956.68	9.07211e-09	4956.68	0	9.00356e-08
3886_VPDSSGPERIL_2_run0	1/sp|P61978|HNRPK_HUMAN	1111840	2925.01	9.07528e-09	2925.01	0	9.0277e-08
1673_APARPLSTNL_2_run0	1/sp|Q6UB99|ANR11_HUMAN	28826	2478.67	9.09231e-09	2478.67	0	9.0312e-08
1414_VLSNVEVTL_2_run0	1/sp|Q14204|DYHC1_HUMAN	52010	4155.6	9.11907e-09	4155.6	0	9.03829e-08
1594_YVLPVVSYI_2_run0	1/sp|Q8IXH7|NELFD_HUMAN	51369	6011.25	9.18259e-09	6011.25	0	9.06652e-08
2962_RPFPGNMSSM_2_run0	1/sp|Q8NFD5|ARI1B_HUMAN	62271	3008.83	9.2021e-09	3008.83	0	9.146e-08
425_GLKNGVPAV_2_run0	1/sp|P53621|COPA_HUMAN	571928	2326.62	9.21726e-09	2326.62	0	9.21869e-08
1426_VLWDRTFSL_2_run0	1/sp|P42224|STAT1_HUMAN	629625	5101.07	9.21726e-09	5101.07	0	9.23141e-08
3176_RPRHQGVM_2_run0	1/sp|P62736|ACTA_HUMAN	8465	615.28	9.24828e-09	615.28	0	9.25063e-08
3194_RPRPDEERPL_3_run0	1/sp|Q86YV0|RASL3_HUMAN	176683	1329.1	9.27801e-09	1329.1	0	9.26139e-08
3515_SPMSQRPVL_2_run0	1/sp|Q9NSV4|DIAP3_HUMAN	143626	2552.9	9.28053e-09	2552.9	0	9.27554e-08
3976_YPEELKPVL_2_run0	1/sp|Q5UIP0|RIF1_HUMAN	54148	3748.72	9.31142e-09	3748.72	0	9.29604e-08
1393_VLLSTIHEL_2_run0	1/sp|Q6I9Y2|THOC7_HUMAN	202492	4071.47	9.32984e-09	4071.47	0	9.31539e-08
3604_SPRKETSARSL_3_run0	1/sp|Q92844|TANK_HUMAN	51128	764.927	9.36824e-09	764.927	0	9.33728e-08
1470_YIFEEPFTI_2_run0	1/sp|P08237|PFKAM_HUMAN	35836	6017.11	9.40602e-09	6017.11	0	9.40941e-08
1143_RVFENIVAV_2_run0	1/sp|Q13077|TRAF1_HUMAN	199472	3838.56	9.42512e-09	3838.56	0	9.41987e-08
1272_TILPKVMQV_2_run0	1/sp|P55081|MFAP1_HUMAN	151302	4094.19	9.4291e-09	4094.19	0	9.4264e-08
1665_APAQRAQSL_2_run0	1/sp|Q63ZY3|KANK2_HUMAN	175365	1203.84	9.44661e-09	1203.84	0	9.44557e-08
3943_VPRTIGAEL_2_run0	1/sp|Q9NZQ3|SPN90_HUMAN	180568	2891.48	9.47068e-09	2891.48	0	9.4713e-08
2566_LPASGRSAEV_2_run0	1/sp|O15533|TPSN_HUMAN	124454	1630.44	9.48124e-09	1630.44	0	9.49052e-08
3742_SPYLPRGDPVL_2_run0	1/sp|P49754|VPS41_HUMAN	71433	3692.03	9.4863e-09	3692.03	0	9.56557e-08
2289_IPSEWHIEL_2_run0	1/sp|Q9H583|HEAT1_HUMAN	16899	4911.94	9.50343e-09	4911.94	0	9.57128e-08
2764_NPISTVTEL_2_run0	1/sp|P50991|TCPD_HUMAN	89515	3972.91	9.52967e-09	3972.91	0	9.63749e-08
3686_SPSLPNITL_2_run0	1/sp|P56524|HDAC4_HUMAN	262511	4824.68	9.54456e-09	4824.68	0	9.65297e-08
137_AMAPGTVTV_2_run0	1/sp|Q9P243|ZFAT_HUMAN	69448	2896.95	9.56058e-09	2896.95	0	9.65391e-08
965_MLFPGSIAL_2_run0	1/sp|Q15691|MARE1_HUMAN	401479	5846.3	9.58514e-09	5846.3	0	9.66994e-08
1961_APSLKNAAF_2_run0	1/sp|P24539|AT5F1_HUMAN	82533	2736.23	9.60041e-09	2736.23	0	9.68903e-08
2757_NPASRLTAL_2_run0	1/sp|P36894|BMR1A_HUMAN	156164	2820.81	9.621e-09	2820.81	0	9.72901e-08
273_FLLPIKTVGV_2_run0	1/sp|P49915|GUAA_HUMAN	444247	5141.84	9.62582e-09	5141.84	0	9.7328e-08
1983_APSRNGMVL_2_run0	1/sp|P26373|RL13_HUMAN	2775300	2255.79	9.64818e-09	2255.79	0	9.75365e-08
1882_APRNSPTGL_2_run0	1/sp|P78312|F193A_HUMAN	166991	1502.97	9.65654e-09	1502.97	0	9.78571e-08
2838_QPTGGKARL_2_run0	2/sp|P42677|RS27_HUMAN/sp|Q71UM5|RS27L_HUMAN	56730	806.202	9.69204e-09	806.202	0	9.80783e-08
3094_RPNGVITGL_2_run0	1/sp|Q96QD9|UIF_HUMAN	1216970	2829.09	9.70321e-09	2829.09	0	9.83527e-08
596_ILTDITKGV_2_run0	1/sp|P13639|EF2_HUMAN	707768	3343.25	9.73526e-09	3343.25	0	9.89054e-08
1409_VLQDIQVM(UniMod:35)L_2_run0	1/sp|P33992|MCM5_HUMAN	88550	4551.3	9.74218e-09	4551.3	0	9.95622e-08
3299_RPYPSPGAVL_2_run0	1/sp|O60828|PQBP1_HUMAN	626587	3163.47	9.76913e-09	3163.47	0	9.98244e-08
760_KLQELNYNL_2_run0	1/sp|P42224|STAT1_HUMAN	330028	3501.63	9.80197e-09	3501.63	0	9.98252e-08
897_LLLDVPTAAV_2_run0	1/sp|P13284|GILT_HUMAN	321387	5062.92	9.83559e-09	5062.92	0	1.0017e-07
3773_TPAVIRISV_2_run0	1/sp|P51610|HCFC1_HUMAN	40950	3792.99	9.85028e-09	3792.99	0	1.00215e-07
1287_TLIDLPGITRV_2_run0	2/sp|P20592|MX2_HUMAN/sp|P20591|MX1_HUMAN	708412	5075.02	9.86908e-09	5075.02	0	1.00515e-07
944_LMAEMGVHSV_2_run0	1/sp|Q9NWZ5|UCKL1_HUMAN	77442	3099.65	9.90181e-09	3099.65	0	1.01043e-07
3205_RPRPSSVLRTL_3_run0	1/sp|Q9NTK1|DEPP_HUMAN	97225	2253.63	9.90872e-09	2253.63	0	1.01143e-07
1725_APGPPGRSM_2_run0	1/sp|Q8IY67|RAVR1_HUMAN	426423	1469.16	9.91637e-09	1469.16	0	1.01638e-07
43_ALFQRPPLI_2_run0	1/sp|O60832|DKC1_HUMAN	125642	4523.81	9.92871e-09	4523.81	0	1.01828e-07
1836_APREGQGSSAV_2_run0	1/sp|Q16566|KCC4_HUMAN	184438	833.884	1.0002e-08	833.884	0	1.02364e-07
3139_RPRAPIIAV_2_run0	1/sp|P14618|KPYM_HUMAN	47174	2639.01	1.00353e-08	2639.01	0	1.02672e-07
3445_SPGQRAVL_2_run0	1/sp|Q12772|SRBP2_HUMAN	79306	1581.83	1.00557e-08	1581.83	0	1.02931e-07
1682_APASWWNHM_2_run0	1/sp|O60427|FADS1_HUMAN	30056	3943.09	1.00935e-08	3943.09	0	1.03599e-07
3880_VPASQRAVM_2_run0	1/sp|Q9ULI0|ATD2B_HUMAN	127308	1584.61	1.01248e-08	1584.61	0	1.03796e-07
29_ALDSQVPKV_2_run0	1/sp|Q5JSP0|FGD3_HUMAN	134635	2705.46	1.01291e-08	2705.46	0	1.04342e-07
1788_APLPRPGAVL_2_run0	1/sp|O75638|CTAG2_HUMAN	1994140	3392.25	1.01351e-08	3392.25	0	1.04536e-07
1808_APNTGRANQQM_2_run0	1/sp|Q9NZS9|BFAR_HUMAN	23226	1040.9	1.01474e-08	1040.9	0	1.04572e-07
3143_RPRDALPRLL_3_run0	1/sp|Q86Y56|HEAT2_HUMAN	146594	3011.88	1.0179e-08	3011.88	0	1.04648e-07
3939_VPRSQGTEAEL_2_run0	1/sp|Q8NAG6|ANKL1_HUMAN	105220	1808	1.01979e-08	1808	0	1.05039e-07
689_KLIDRTESL_2_run0	1/sp|P33241|LSP1_HUMAN	446650	2185.6	1.02148e-08	2185.6	0	1.05134e-07
2452_KPRDVSSVELL_2_run0	1/sp|Q01082|SPTB2_HUMAN	210843	2996.1	1.02349e-08	2996.1	0	1.0581e-07
434_GLLGTLVQL_2_run0	1/sp|P35222|CTNB1_HUMAN	157865	6091.04	1.02536e-08	6091.04	0	1.05921e-07
1815_APQPHRHVL_2_run0	1/sp|P50851|LRBA_HUMAN	15817	858.477	1.02857e-08	858.477	0	1.05935e-07
1311_TLQEVHFLL_2_run0	1/sp|Q460N5|PAR14_HUMAN	65638	4970.93	1.03157e-08	4970.93	0	1.05967e-07
1789_APLQHRHVL_2_run0	1/sp|Q504T8|MIDN_HUMAN	201548	1242.07	1.03303e-08	1242.07	0	1.0638e-07
3073_RPLRSTGVAL_2_run0	1/sp|Q15437|SC23B_HUMAN	246731	2061.76	1.0346e-08	2061.76	0	1.06423e-07
2664_LPSARPEL_2_run0	1/sp|Q9NR09|BIRC6_HUMAN	179933	2606.05	1.0382e-08	2606.05	0	1.06834e-07
1658_APAPSKGQTL_2_run0	1/sp|Q6ZRI6|CO039_HUMAN	368110	1342.49	1.03938e-08	1342.49	0	1.06869e-07
151_ATMPVVPSV_2_run0	1/sp|Q9NR46|SHLB2_HUMAN	44427	3938.77	1.04133e-08	3938.77	0	1.07052e-07
2803_QIRDIMQAL_2_run0	1/sp|Q15554|TERF2_HUMAN	90533	4329.33	1.04456e-08	4329.33	0	1.07246e-07
3851_TPSLVKSTSQL_2_run0	1/sp|Q06055|AT5G2_HUMAN	2280550	2858.37	1.04462e-08	2858.37	0	1.07374e-07
2032_AVAKNRKAV_2_run0	1/sp|Q969S3|ZN622_HUMAN	8364	498.303	1.04792e-08	498.303	0	1.0888e-07
3866_TPWQPPTVL_2_run0	1/sp|Q9NZJ0|DTL_HUMAN	506604	4733.06	1.05118e-08	4733.06	0	1.0943e-07
3707_SPSWRSTTVL_2_run0	1/sp|O00159|MYO1C_HUMAN	33875	3292.22	1.05262e-08	3292.22	0	1.09522e-07
3930_VPRPPQTSL_2_run0	1/sp|O95785|WIZ_HUMAN	754884	2466.01	1.05449e-08	2466.01	0	1.09733e-07
1274_TLADVLYHV_2_run0	1/sp|Q9UBL3|ASH2L_HUMAN	119140	4627.57	1.05831e-08	4627.57	0	1.10225e-07
1454_VVLPAPPAV_2_run0	1/sp|Q96S59|RANB9_HUMAN	53875	4154.47	1.05857e-08	4154.47	0	1.10236e-07
2743_MPSEQIRNQL_2_run0	1/sp|Q14152|EIF3A_HUMAN	44588	2731.49	1.062e-08	2731.49	0	1.10913e-07
659_KLFDDKLQNC_2_run0	1/sp|Q96SU4|OSBL9_HUMAN	25982	2763.77	1.06457e-08	2763.77	0	1.11113e-07
2731_MPRGSGSGF_2_run0	1/sp|Q9NWH9|SLTM_HUMAN	102461	1621.46	1.06576e-08	1621.46	0	1.11709e-07
2436_KPQDYKKRLSV_3_run0	1/sp|P35222|CTNB1_HUMAN	41095	1537.56	1.06737e-08	1537.56	0	1.11731e-07
1875_APRLMITHI_2_run0	1/sp|Q9NTJ3|SMC4_HUMAN	137387	3336.39	1.06883e-08	3336.39	0	1.1216e-07
1759_APKDSSSDL_2_run0	1/sp|Q6IQ32|ADNP2_HUMAN	59837	973.117	1.07136e-08	973.117	0	1.12257e-07
3221_RPRVTEPISA_2_run0	1/sp|O14791|APOL1_HUMAN	41948	1825.12	1.07263e-08	1825.12	0	1.12638e-07
2208_HPRTSITVVL_2_run0	1/sp|Q9NQT4|EXOS5_HUMAN	413635	3090.92	1.0738e-08	3090.92	0	1.12756e-07
420_GLIGVGLINV_2_run0	1/sp|A3KN83|SBNO1_HUMAN	202015	5743.17	1.07541e-08	5743.17	0	1.12843e-07
2027_APYMRSMMQSL_2_run0	1/sp|Q9UMX0|UBQL1_HUMAN	22088	4039.61	1.07924e-08	4039.61	0	1.13095e-07
1955_APSHLMALLTL_2_run0	1/sp|Q9NZ32|ARP10_HUMAN	47736	5655.58	1.08036e-08	5655.58	0	1.13129e-07
364_FVLPELPSV_2_run0	1/sp|P53990|IST1_HUMAN	367974	5872.28	1.08259e-08	5872.28	0	1.13171e-07
3796_TPKNTSVSL_2_run0	1/sp|Q96TA2|YMEL1_HUMAN	213013	1875.02	1.08597e-08	1875.02	0	1.13588e-07
401_GLFDQHFRL_2_run0	1/sp|Q9Y2I1|NISCH_HUMAN	42098	4597.89	1.08896e-08	4597.89	0	1.13737e-07
3858_TPSSGKSAV_2_run0	2/sp|P01877|IGHA2_HUMAN/sp|P01876|IGHA1_HUMAN	65266	710.098	1.0911e-08	710.098	0	1.14256e-07
1833_APREDPVLL_2_run0	1/sp|Q7LBC6|KDM3B_HUMAN	370040	3130.55	1.0927e-08	3130.55	0	1.14764e-07
1597_AAAAGRIAI_2_run0	1/sp|P26599|PTBP1_HUMAN	63737	2388.52	1.09558e-08	2388.52	0	1.15064e-07
1856_APRIALHTAL_2_run0	1/sp|Q9UBD5|ORC3_HUMAN	222123	2988.11	1.09662e-08	2988.11	0	1.15366e-07
3863_TPVAGSQSL_2_run0	1/sp|Q9UQ35|SRRM2_HUMAN	137366	2130.66	1.09714e-08	2130.66	0	1.15428e-07
379_GLADKVYF_2_run0	1/sp|P27708|PYR1_HUMAN	141090	3667.32	1.09849e-08	3667.32	0	1.15552e-07
1158_SILHDVVEV_2_run0	1/sp|O75391|SPAG7_HUMAN	988289	3843.39	1.09935e-08	3843.39	0	1.15771e-07
2085_FPSLREAAL_2_run0	1/sp|P43355|MAGA1_HUMAN	375480	3949.83	1.10383e-08	3949.83	0	1.15794e-07
2896_RPAPLSAEL_2_run0	1/sp|P53602|MVD1_HUMAN	1156380	2925.9	1.1049e-08	2925.9	0	1.15928e-07
1120_RLTPKLMEV_2_run0	1/sp|O15372|EIF3H_HUMAN	411611	3045.71	1.10709e-08	3045.71	0	1.16142e-07
2780_NPRIPYTEL_2_run0	1/sp|Q92830|KAT2A_HUMAN	1094710	3631.93	1.10934e-08	3631.93	0	1.16589e-07
417_GLIEILKKV_2_run0	1/sp|O14737|PDCD5_HUMAN	175217	4610.44	1.11198e-08	4610.44	0	1.16962e-07
255_FLLDGKVLSL_2_run0	1/sp|Q8N1F8|S11IP_HUMAN	29033	5509.53	1.11237e-08	5509.53	0	1.17005e-07
578_ILNPDNSFEIL_2_run0	1/sp|P27824|CALX_HUMAN	32457	5370.19	1.1139e-08	5370.19	0	1.17092e-07
2371_KPIAVGSMSM(UniMod:35)L_2_run0	1/sp|Q9UBT6|POLK_HUMAN	81012	3329.01	1.11416e-08	3329.01	0	1.17103e-07
766_KLQNLNIFL_2_run0	1/sp|A0AVT1|UBA6_HUMAN	100213	4996.19	1.12009e-08	4996.19	0	1.1716e-07
2077_FPRFGGSL_2_run0	1/sp|Q86YC3|NRROS_HUMAN	129797	3789.48	1.12492e-08	3789.48	0	1.17239e-07
2067_FPMELRQFL_2_run0	1/sp|P40763|STAT3_HUMAN	80940	5516.34	1.12616e-08	5516.34	0	1.17947e-07
1217_SLLGDDALVQV_2_run0	1/sp|Q15393|SF3B3_HUMAN	50067	4998.21	1.12788e-08	4998.21	0	1.17958e-07
1476_YLADTVQKL_2_run0	1/sp|Q9NX45|SOLH2_HUMAN	766472	3132.47	1.12884e-08	3132.47	0	1.18166e-07
3257_RPSTPHTITL_2_run0	1/sp|Q12770|SCAP_HUMAN	124021	2416.99	1.12892e-08	2416.99	0	1.18216e-07
236_FLHDHVDLQV_2_run0	1/sp|P78344|IF4G2_HUMAN	57189	3389.64	1.13054e-08	3389.64	0	1.18469e-07
2699_LVRKIYSTL_2_run0	1/sp|O75746|CMC1_HUMAN	26881	2471.71	1.1318e-08	2471.71	0	1.19204e-07
1471_YIFPLDDKAAV_2_run0	1/sp|Q9UKK3|PARP4_HUMAN	97274	4520.82	1.13332e-08	4520.82	0	1.19813e-07
1164_SIYPSPTGV_2_run0	1/sp|Q6P2Q9|PRP8_HUMAN	52355	3275.14	1.13365e-08	3275.14	0	1.19844e-07
3028_RPKETDHKSL_3_run0	1/sp|Q9BVI0|PHF20_HUMAN	88613	602.503	1.13589e-08	602.503	0	1.20945e-07
3875_VPAKKITAA_2_run0	1/sp|P50914|RL14_HUMAN	153980	885.33	1.13703e-08	885.33	0	1.2105e-07
3973_YPAQITPKM_2_run0	1/sp|Q9NX74|DUS2L_HUMAN	66661	2878.57	1.13866e-08	2878.57	0	1.21079e-07
1493_YLFDRNGVCL_2_run0	1/sp|Q9Y5R8|TPPC1_HUMAN	24107	4586.66	1.14118e-08	4586.66	0	1.2109e-07
2210_HPSETRTLVAV_2_run0	1/sp|Q9H967|WDR76_HUMAN	28342	2233.21	1.14585e-08	2233.21	0	1.21405e-07
2281_IPRSILM(UniMod:35)TTF_2_run0	1/sp|Q16531|DDB1_HUMAN	37209	4300.12	1.14903e-08	4300.12	0	1.21557e-07
888_LLHELLTHV_2_run0	1/sp|Q6TFL4|KLH24_HUMAN	51456	3756.92	1.15088e-08	3756.92	0	1.21631e-07
1638_APALPGPQF_2_run0	1/sp|Q16633|OBF1_HUMAN	155939	3987.8	1.1513e-08	3987.8	0	1.21693e-07
1989_APSSVAHTSM_2_run0	1/sp|Q9Y5U2|TSSC4_HUMAN	24846	1483.03	1.15319e-08	1483.03	0	1.21704e-07
1325_TLYEAVREV_2_run0	1/sp|P62906|RL10A_HUMAN	728667	3252.93	1.15625e-08	3252.93	0	1.21773e-07
680_KLIAQNLEL_2_run0	1/sp|P52732|KIF11_HUMAN	57327	3869.89	1.15932e-08	3869.89	0	1.22384e-07
916_LLNEILEQV_2_run0	1/sp|Q9BPX3|CND3_HUMAN	47955	5272.63	1.16134e-08	5272.63	0	1.22751e-07
250_FLKDLVASV_2_run0	1/sp|Q14919|NC2A_HUMAN	60593	4225.27	1.16399e-08	4225.27	0	1.22942e-07
1304_TLLRLLYEA_2_run0	1/sp|Q7L2H7|EIF3M_HUMAN	39361	5004.05	1.16437e-08	5004.05	0	1.23325e-07
1261_SMLQKTWLL_2_run0	1/sp|Q9BWH6|RPAP1_HUMAN	33940	4886.44	1.16595e-08	4886.44	0	1.24189e-07
3702_SPSSVTGNAL_2_run0	1/sp|Q9NYB0|TE2IP_HUMAN	694609	2310.14	1.17086e-08	2310.14	0	1.24523e-07
2796_NVRIATTAL_2_run0	1/sp|Q13571|LAPM5_HUMAN	2735690	2912.11	1.17157e-08	2912.11	0	1.24598e-07
1201_SLIRNLEQL_2_run0	1/sp|Q15833|STXB2_HUMAN	66774	4335.44	1.1735e-08	4335.44	0	1.2473e-07
1839_APRELGLGL_2_run0	1/sp|Q9BTD8|RBM42_HUMAN	592550	3567.07	1.1745e-08	3567.07	0	1.2486e-07
987_NLAKCIVSV_2_run0	1/sp|Q96GQ5|CP058_HUMAN	66657	3616.35	1.17646e-08	3616.35	0	1.25124e-07
2398_KPKKPVGAA_2_run0	1/sp|P16403|H12_HUMAN	19573	509.634	1.18011e-08	509.634	0	1.25846e-07
3516_SPMSVNAVM_2_run0	1/sp|P50991|TCPD_HUMAN	63145	3442.87	1.182e-08	3442.87	0	1.26007e-07
1570_YLVPELDGV_2_run0	1/sp|Q9H269|VPS16_HUMAN	30671	4995.01	1.18404e-08	4995.01	0	1.26318e-07
3004_RPILTIIT_2_run0	1/sp|P04637|P53_HUMAN	162248	4031.29	1.18559e-08	4031.29	0	1.26488e-07
1905_APRQPGLMA_2_run0	1/sp|Q9Y6H1|CHCH2_HUMAN	2217670	1955.8	1.18567e-08	1955.8	0	1.26834e-07
1814_APQPAKPRL_2_run0	1/sp|Q9UBN7|HDAC6_HUMAN	48650	1534.37	1.18567e-08	1534.37	0	1.26721e-07
2865_RPAAPGQTPL_2_run0	1/sp|Q12796|PNRC1_HUMAN	146863	1940.31	1.18707e-08	1940.31	0	1.26863e-07
3811_TPNEERNVM(UniMod:35)_2_run0	1/sp|P35606|COPB2_HUMAN	35394	881.731	1.18998e-08	881.731	0	1.27106e-07
807_KLYNPENIYL_2_run0	1/sp|P23258|TBG1_HUMAN	115709	4113.82	1.19134e-08	4113.82	0	1.28118e-07
2192_HPRAYFMQL_2_run0	1/sp|Q9Y2Y1|RPC10_HUMAN	229354	3538.14	1.19363e-08	3538.14	0	1.2832e-07
1331_TVADKIHSV_2_run0	1/sp|O95147|DUS14_HUMAN	93518	1791.5	1.19596e-08	1791.5	0	1.28992e-07
352_FQDPVPLTV_2_run0	1/sp|O15164|TIF1A_HUMAN	87824	4710.14	1.19772e-08	4710.14	0	1.29216e-07
895_LLLAAPAQA_2_run0	1/sp|P17900|SAP3_HUMAN	34570	3609.22	1.19812e-08	3609.22	0	1.30673e-07
3127_RPQLQRQVL_2_run0	1/sp|Q96HA7|TONSL_HUMAN	41230	2027.63	1.20128e-08	2027.63	0	1.31374e-07
3381_SPAPRTAL_2_run0	1/sp|Q96RJ3|TR13C_HUMAN	376142	1651.09	1.20292e-08	1651.09	0	1.31664e-07
3680_SPSKPAKSL_2_run0	1/sp|P86790|CCZ1B_HUMAN	106998	805.021	1.20406e-08	805.021	0	1.31968e-07
2610_LPNGLRESI_2_run0	1/sp|Q96P70|IPO9_HUMAN	189479	3047.5	1.21086e-08	3047.5	0	1.31981e-07
26_ALDKATVLL_2_run0	1/sp|Q53EL6|PDCD4_HUMAN	256106	3560.43	1.21466e-08	3560.43	0	1.32051e-07
2211_HPTSHVSLL_2_run0	1/sp|Q9NVR0|KLH11_HUMAN	52380	2146.08	1.21786e-08	2146.08	0	1.32114e-07
3681_SPSKPNPVF_2_run0	1/sp|Q16656|NRF1_HUMAN	196952	2307.47	1.22089e-08	2307.47	0	1.32119e-07
2649_LPRNNSIGESL_2_run0	1/sp|Q86VY9|T200A_HUMAN	42325	2718.03	1.22496e-08	2718.03	0	1.32677e-07
412_GLIDHQTYL_2_run0	1/sp|Q15149|PLEC_HUMAN	156924	3470.05	1.22608e-08	3470.05	0	1.33956e-07
781_KLWDIINVN_2_run0	1/sp|Q3SXM5|HSDL1_HUMAN	75905	4749.44	1.22676e-08	4749.44	0	1.3454e-07
3745_SPYPTKTQTM_2_run0	1/sp|P04843|RPN1_HUMAN	327609	1813.56	1.22925e-08	1813.56	0	1.34609e-07
3598_SPRHSFNNL_2_run0	1/sp|Q01201|RELB_HUMAN	56222	1625.23	1.23014e-08	1625.23	0	1.34972e-07
3000_RPIILLDSL_2_run0	1/sp|Q96JH7|VCIP1_HUMAN	20448	5052.4	1.23256e-08	5052.4	0	1.35667e-07
443_GLMDTVKKV_2_run0	1/sp|Q9Y692|GMEB1_HUMAN	88340	2899.98	1.23582e-08	2899.98	0	1.36107e-07
880_LLFDRPMHV_2_run0	1/sp|P52272|HNRPM_HUMAN	264363	3690.83	1.23972e-08	3690.83	0	1.36726e-07
2156_GPRSSLRVL_2_run0	1/sp|Q15393|SF3B3_HUMAN	434488	2127.21	1.2408e-08	2127.21	0	1.36921e-07
599_ILVDTVWAL_2_run0	2/sp|O00505|IMA4_HUMAN/sp|O00629|IMA3_HUMAN	34561	6063.9	1.24328e-08	6063.9	0	1.37758e-07
867_LLASEVPQL_2_run0	1/sp|Q6PJG6|BRAT1_HUMAN	131776	4392.94	1.24995e-08	4392.94	0	1.37874e-07
325_FLWDEGFHQL_2_run0	1/sp|Q13724|MOGS_HUMAN	207317	5364.78	1.25149e-08	5364.78	0	1.38528e-07
3351_SPAGKTNAL_2_run0	1/sp|Q8NI35|INADL_HUMAN	299305	1126.15	1.25486e-08	1126.15	0	1.3872e-07
3336_SARDHAISL_2_run0	1/sp|Q9Y520|PRC2C_HUMAN	66091	1884.06	1.25655e-08	1884.06	0	1.39445e-07
1140_RMLPHAPGV_2_run0	1/sp|Q13547|HDAC1_HUMAN	1416250	2255.66	1.26043e-08	2255.66	0	1.39728e-07
1405_VLMTEDIKL_2_run0	1/sp|Q04637|IF4G1_HUMAN	418836	4238.98	1.26484e-08	4238.98	0	1.40585e-07
1052_RLDELGGVYL_2_run0	1/sp|P04844|RPN2_HUMAN	224652	4401.72	1.26742e-08	4401.72	0	1.40617e-07
2587_LPHNRLVSL_2_run0	1/sp|Q96CX6|LRC58_HUMAN	273522	2895.79	1.26792e-08	2895.79	0	1.40886e-07
3960_VVKPPGSSL_2_run0	1/sp|Q92560|BAP1_HUMAN	2562990	2111.06	1.26925e-08	2111.06	0	1.41009e-07
1896_APRPPPKPM_2_run0	2/sp|P62854|RS26_HUMAN/sp|Q5JNZ5|RS26L_HUMAN	458225	1339.82	1.27226e-08	1339.82	0	1.41185e-07
3277_RPVPWNAL_2_run0	1/sp|Q05923|DUS2_HUMAN	148033	3689.99	1.27369e-08	3689.99	0	1.41615e-07
3054_RPKSTSTSSM_2_run0	1/sp|P27816|MAP4_HUMAN	5637	368.663	1.27603e-08	368.663	0	1.42193e-07
922_LLPEGPPAI_2_run0	1/sp|Q15011|HERP1_HUMAN	78828	4132.46	1.27736e-08	4132.46	0	1.43019e-07
2918_RPDDKRILEF_3_run0	1/sp|O60502|NCOAT_HUMAN	184921	2916.68	1.27911e-08	2916.68	0	1.43214e-07
1712_APFEPLASGIL_2_run0	1/sp|P01033|TIMP1_HUMAN	137059	5630.31	1.28059e-08	5630.31	0	1.43397e-07
2829_QPREPQVYTL_2_run0	1/sp|P01857|IGHG1_HUMAN	373528	3063.73	1.2816e-08	3063.73	0	1.43764e-07
101_ALSDLEITL_2_run0	1/sp|Q96AC1|FERM2_HUMAN	56827	5240.95	1.28409e-08	5240.95	0	1.4395e-07
3848_TPSGSREGSL_2_run0	1/sp|Q6P3S6|FBX42_HUMAN	312447	1170.62	1.28803e-08	1170.62	0	1.44049e-07
470_GLVPFLVSV_2_run0	1/sp|P52292|IMA1_HUMAN	223267	6345.03	1.28845e-08	6345.03	0	1.44058e-07
56_ALLDKLYA_2_run0	1/sp|Q9NV31|IMP3_HUMAN	383798	3765.13	1.29184e-08	3765.13	0	1.44269e-07
2786_NPRQAAYEM(UniMod:35)_2_run0	1/sp|Q9H0D6|XRN2_HUMAN	49379	1056.45	1.29369e-08	1056.45	0	1.44784e-07
890_LLIENVAS_2_run0	1/sp|P07203|GPX1_HUMAN	134904	3497.61	1.29408e-08	3497.61	0	1.44809e-07
2937_RPDSPAHVL_2_run0	1/sp|Q05923|DUS2_HUMAN	215586	1779.95	1.30073e-08	1779.95	0	1.4487e-07
2573_LPDLQRSKQAL_2_run0	1/sp|Q9UL45|BL1S6_HUMAN	118973	2670.02	1.30258e-08	2670.02	0	1.45271e-07
3588_SPRGFPLGL_2_run0	1/sp|Q9P270|SLAI2_HUMAN	326230	4346.12	1.30604e-08	4346.12	0	1.45902e-07
2445_KPQTKLLIL_2_run0	1/sp|Q99081|HTF4_HUMAN	395163	3441.06	1.30701e-08	3441.06	0	1.45948e-07
1299_TLLGHEFVL_2_run0	1/sp|P30260|CDC27_HUMAN	310476	4826.96	1.30879e-08	4826.96	0	1.46514e-07
1148_RVSDINFTL_2_run0	1/sp|Q5H9R7|PP6R3_HUMAN	512532	4131.26	1.30974e-08	4131.26	0	1.48753e-07
647_KLAEALPSL_2_run0	1/sp|P33076|C2TA_HUMAN	185764	3787.79	1.31373e-08	3787.79	0	1.48833e-07
2641_LPRIQSTAL_2_run0	1/sp|Q13085|ACACA_HUMAN	257443	3245.59	1.31702e-08	3245.59	0	1.4901e-07
643_KLADFGDAVQL_2_run0	1/sp|O75962|TRIO_HUMAN	65452	4275.42	1.31882e-08	4275.42	0	1.49088e-07
2333_KPANVFITA_2_run0	1/sp|Q9HC98|NEK6_HUMAN	126001	2838.77	1.32313e-08	2838.77	0	1.49446e-07
396_GLDPNKPPEL_2_run0	1/sp|Q9ULL5|PRR12_HUMAN	149772	3025.29	1.32505e-08	3025.29	0	1.50101e-07
1332_TVAPFNPTV_2_run0	1/sp|Q96BU1|S1PBP_HUMAN	49906	3685.8	1.3264e-08	3685.8	0	1.50496e-07
409_GLIDENPGL_2_run0	1/sp|P78527|PRKDC_HUMAN	74628	3819.77	1.32925e-08	3819.77	0	1.50557e-07
2820_QPMNPTQNM(UniMod:35)_2_run0	1/sp|Q14444|CAPR1_HUMAN	29791	1444.28	1.33094e-08	1444.28	0	1.50708e-07
1319_TLVDFPLHL_2_run0	1/sp|Q8WXG6|MADD_HUMAN	43674	5615.07	1.33613e-08	5615.07	0	1.51785e-07
1113_RLSDAQIYV_2_run0	1/sp|O14879|IFIT3_HUMAN	640391	3137.54	1.33831e-08	3137.54	0	1.53142e-07
40_ALFPGVALL_2_run0	1/sp|P30101|PDIA3_HUMAN	33777	6345.62	1.34021e-08	6345.62	0	1.53462e-07
1579_YMADRLLGV_2_run0	1/sp|Q14999|CUL7_HUMAN	60256	4001.21	1.34196e-08	4001.21	0	1.53686e-07
620_KIADFGWSV_2_run0	1/sp|Q9UQB9|AURKC_HUMAN	297480	4477.42	1.34337e-08	4477.42	0	1.54435e-07
2022_APVYLAAVI_2_run0	13/sp|P16104|H2AX_HUMAN/sp|Q9BTM1|H2AJ_HUMAN/sp|P0C5Z0|H2AB2_HUMAN/sp|P0C5Y9|H2AB1_HUMAN/sp|Q7L7L0|H2A3_HUMAN/sp|Q8IUE6|H2A2B_HUMAN/sp|P0C0S8|H2A1_HUMAN/sp|Q99878|H2A1J_HUMAN/sp|Q96KK5|H2A1H_HUMAN/sp|P20671|H2A1D_HUMAN/sp|Q93077|H2A1C_HUMAN/sp|P04908|H2A1B_HUMAN/sp|Q96QV6|H2A1A_HUMAN	79321	5336.64	1.34556e-08	5336.64	0	1.54894e-07
2417_KPMEKLLGL_2_run0	1/sp|Q9Y3D3|RT16_HUMAN	193269	3508.52	1.34852e-08	3508.52	0	1.55897e-07
3219_RPRTPPEAIAL_2_run0	1/sp|P49841|GSK3B_HUMAN	178638	2781.72	1.35122e-08	2781.72	0	1.56268e-07
233_FLFQEPRSI_2_run0	1/sp|Q9UK61|F208A_HUMAN	98791	4256.07	1.35793e-08	4256.07	0	1.56758e-07
2144_GPRAVDVLSEL_2_run0	1/sp|Q8NCN5|PDPR_HUMAN	49365	4514.69	1.36052e-08	4514.69	0	1.56878e-07
15_ALADKELLPSV_2_run0	1/sp|Q9BRQ8|AIFM2_HUMAN	112094	3958.9	1.36427e-08	3958.9	0	1.56884e-07
1432_VLYEEVEELRL_2_run0	1/sp|Q5SZK8|FREM2_HUMAN	26046	5069.77	1.36776e-08	5069.77	0	1.5734e-07
1271_TIIDLPGITRV_2_run0	2/sp|P20591|MX1_HUMAN/sp|P20592|MX2_HUMAN	708412	5075.02	1.36848e-08	5075.02	0	1.58067e-07
1598_AAAAGRKTL_2_run0	1/sp|Q9BSJ5|CQ080_HUMAN	54895	729.015	1.37118e-08	729.015	0	1.5821e-07
629_KILDYEVTL_2_run0	1/sp|P40189|IL6RB_HUMAN	72517	4314.2	1.37781e-08	4314.2	0	1.58283e-07
1422_VLVEDSNNHHL_3_run0	1/sp|O96006|ZBED1_HUMAN	30301	1928.14	1.38248e-08	1928.14	0	1.58436e-07
1947_APSDRPLQL_2_run0	1/sp|Q9H814|PHAX_HUMAN	146648	2765.75	1.38379e-08	2765.75	0	1.59655e-07
3220_RPRVALQQSF_2_run0	1/sp|Q9P265|DIP2B_HUMAN	13678	2453.3	1.38379e-08	2453.3	0	1.59419e-07
1877_APRLPITGL_2_run0	1/sp|Q8TF50|ZN526_HUMAN	1660730	4123.31	1.3872e-08	4123.31	0	1.59794e-07
3271_RPVASSSTATL_2_run0	1/sp|Q9H422|HIPK3_HUMAN	42578	1753.77	1.39135e-08	1753.77	0	1.60239e-07
2557_LPALPLAEL_2_run0	1/sp|Q9UJX2|CDC23_HUMAN	96164	5920.22	1.39482e-08	5920.22	0	1.60538e-07
3816_TPRATLITF_2_run0	1/sp|P11717|MPRI_HUMAN	297330	3985.73	1.39796e-08	3985.73	0	1.60995e-07
3496_SPLPSPSAM_2_run0	1/sp|Q8WXI9|P66B_HUMAN	114656	3262.43	1.39881e-08	3262.43	0	1.6125e-07
1835_APREGQGSSA_2_run0	1/sp|Q16566|KCC4_HUMAN	24069	519.626	1.401e-08	519.626	0	1.61306e-07
2043_AVRNVPDAL_2_run0	1/sp|O60346|PHLP1_HUMAN	77702	2479.74	1.40922e-08	2479.74	0	1.61842e-07
2842_QVRLPLGTL_2_run0	1/sp|O43148|MCES_HUMAN	201076	4382.69	1.41196e-08	4382.69	0	1.62161e-07
2349_KPEEQRQAL_2_run0	1/sp|Q15149|PLEC_HUMAN	82057	871.185	1.41527e-08	871.185	0	1.62396e-07
3615_SPRLSQTFL_2_run0	1/sp|Q92608|DOCK2_HUMAN	741794	3540.12	1.41906e-08	3540.12	0	1.62498e-07
3242_RPSPWRPLVL_2_run0	1/sp|Q9Y4P1|ATG4B_HUMAN	32514	4028.53	1.42136e-08	4028.53	0	1.63139e-07
3691_SPSMKKAVSLI_2_run0	1/sp|Q9Y6G5|COMDA_HUMAN	24855	3023.28	1.42279e-08	3023.28	0	1.63219e-07
1044_RLAEVVHEL_2_run0	1/sp|Q9Y222|DMTF1_HUMAN	212409	2806	1.42359e-08	2806	0	1.63396e-07
2178_HPHSNQSSL_2_run0	1/sp|Q9UPW0|FOXJ3_HUMAN	50627	654.664	1.42808e-08	654.664	0	1.63779e-07
3306_RPYTNKVITL_2_run0	1/sp|Q14004|CDK13_HUMAN	61645	2747.18	1.43573e-08	2747.18	0	1.63923e-07
3224_RPSASTQAL_2_run0	1/sp|Q16531|DDB1_HUMAN	1195560	1480.33	1.43919e-08	1480.33	0	1.64635e-07
1932_APRTVLLLLSA_2_run0	13/sp|Q31612|1B73_HUMAN/sp|Q29836|1B67_HUMAN/sp|P30488|1B50_HUMAN/sp|P30487|1B49_HUMAN/sp|P30486|1B48_HUMAN/sp|P30483|1B45_HUMAN/sp|P30480|1B42_HUMAN/sp|P30479|1B41_HUMAN/sp|P30475|1B39_HUMAN/sp|Q95365|1B38_HUMAN/sp|P30462|1B14_HUMAN/sp|P30460|1B08_HUMAN/sp|P01889|1B07_HUMAN	78778	4985.49	1.44262e-08	4985.49	0	1.65679e-07
2260_IPQGGRGAIQF_2_run0	2/sp|Q15437|SC23B_HUMAN/sp|Q15436|SC23A_HUMAN	430676	3123.38	1.44741e-08	3123.38	0	1.65944e-07
2662_LPRVADILTQL_2_run0	1/sp|Q9BZZ5|API5_HUMAN	124065	5682.35	1.45004e-08	5682.35	0	1.66113e-07
268_FLLKLTPLL_2_run0	1/sp|O75448|MED24_HUMAN	21575	6122.09	1.45164e-08	6122.09	0	1.66239e-07
732_KLLPSVTEL_2_run0	1/sp|P21675|TAF1_HUMAN	37235	4080.71	1.45302e-08	4080.71	0	1.66421e-07
1083_RLLDYVVNI_2_run0	1/sp|Q63ZY3|KANK2_HUMAN	142969	4885.1	1.45765e-08	4885.1	0	1.66637e-07
631_KILPTLEAV_2_run0	1/sp|Q12905|ILF2_HUMAN	1493500	3901.67	1.46086e-08	3901.67	0	1.66786e-07
314_FLSTLHEVYL_2_run0	1/sp|Q9NPI6|DCP1A_HUMAN	30035	4648.6	1.46248e-08	4648.6	0	1.66819e-07
2141_GPQSGKSAV_2_run0	1/sp|Q14667|K0100_HUMAN	18922	670.589	1.46409e-08	670.589	0	1.66866e-07
1881_APRNSAELTVI_2_run0	1/sp|O60566|BUB1B_HUMAN	186230	3067.98	1.46524e-08	3067.98	0	1.67111e-07
3869_VARMVMLGL_2_run0	1/sp|P26640|SYVC_HUMAN	46606	4515.78	1.46748e-08	4515.78	0	1.67149e-07
632_KILQELPSV_2_run0	1/sp|Q96ST2|IWS1_HUMAN	327518	3784.38	1.46836e-08	3784.38	0	1.67251e-07
287_FLNDEVWNL_2_run0	1/sp|O95825|QORL1_HUMAN	72512	5500.24	1.47275e-08	5500.24	0	1.67585e-07
3399_SPDESKTNEKL_2_run0	1/sp|Q29RF7|PDS5A_HUMAN	7729	1124.69	1.47598e-08	1124.69	0	1.67605e-07
1209_SLLDRFLA_2_run0	1/sp|Q14094|CCNI_HUMAN	59439	4936.9	1.47749e-08	4936.9	0	1.68531e-07
2789_NPRQVFNLL_2_run0	1/sp|P23743|DGKA_HUMAN	56704	4497.93	1.4802e-08	4497.93	0	1.69155e-07
1879_APRLQSEVAEL_2_run0	1/sp|P53990|IST1_HUMAN	2080710	3399.21	1.48135e-08	3399.21	0	1.69453e-07
985_NIIELVHQV_2_run0	1/sp|P43405|KSYK_HUMAN	148045	4392.21	1.48313e-08	4392.21	0	1.69475e-07
3890_VPHGHITSL_2_run0	1/sp|P41227|NAA10_HUMAN	128577	1849.22	1.48556e-08	1849.22	0	1.69918e-07
1378_VLLDAPIQL_2_run0	1/sp|Q9NUQ8|ABCF3_HUMAN	281382	5413.2	1.49239e-08	5413.2	0	1.71325e-07
2195_HPRDPNLLLSV_2_run0	1/sp|O75530|EED_HUMAN	450305	3613.56	1.49899e-08	3613.56	0	1.71339e-07
2784_NPRNFSDNQL_2_run0	1/sp|P37802|TAGL2_HUMAN	32454	2275.49	1.50165e-08	2275.49	0	1.72912e-07
132_ALYGQPLLL_2_run0	1/sp|Q13107|UBP4_HUMAN	130081	5271.28	1.50455e-08	5271.28	0	1.73159e-07
2556_LPALFGATL_2_run0	1/sp|Q9H6Y7|RN167_HUMAN	31335	5751.82	1.50489e-08	5751.82	0	1.73191e-07
63_ALLETVNRL_2_run0	1/sp|Q8IWJ2|GCC2_HUMAN	41012	3687.34	1.50683e-08	3687.34	0	1.75102e-07
2680_LPSSGRSSL_2_run0	1/sp|O95817|BAG3_HUMAN	1463530	1722.4	1.51022e-08	1722.4	0	1.7569e-07
3021_RPKAQPTTL_2_run0	1/sp|Q6P2C8|MED27_HUMAN	170154	1181.77	1.51391e-08	1181.77	0	1.76252e-07
3398_SPDATRESM_2_run0	1/sp|Q15036|SNX17_HUMAN	41028	1183.94	1.51658e-08	1183.94	0	1.76411e-07
3133_RPQSSRPVLL_2_run0	1/sp|Q8IWB7|WDFY1_HUMAN	24582	2117.73	1.51897e-08	2117.73	0	1.76473e-07
484_GLYGAIFRL_2_run0	1/sp|O95977|S1PR4_HUMAN	118750	5288.87	1.52078e-08	5288.87	0	1.76739e-07
1772_APKSGNTGEL_2_run0	1/sp|Q16666|IF16_HUMAN	64426	1104.67	1.52726e-08	1104.67	0	1.77581e-07
2571_LPAWPHRGL_2_run0	1/sp|Q96P11|NSUN5_HUMAN	359566	3211.68	1.53035e-08	3211.68	0	1.77978e-07
403_GLFQGKTPL_2_run0	1/sp|Q9ULW0|TPX2_HUMAN	89462	3604.66	1.53187e-08	3604.66	0	1.78329e-07
400_GLESEELEPEEL_2_run0	1/sp|Q86U42|PABP2_HUMAN	57290	4133.53	1.53309e-08	4133.53	0	1.78572e-07
483_GLYELVWRV_2_run0	1/sp|Q96E22|NGBR_HUMAN	35013	5496.2	1.5359e-08	5496.2	0	1.7868e-07
1222_SLLPFLKAV_2_run0	1/sp|O75533|SF3B1_HUMAN	28764	5627.7	1.5407e-08	5627.7	0	1.78693e-07
818_KMDESKHEI_2_run0	1/sp|Q9Y490|TLN1_HUMAN	22302	829.993	1.54224e-08	829.993	0	1.78965e-07
3552_SPQKTMSVL_2_run0	1/sp|Q12888|TP53B_HUMAN	313562	2427.28	1.54269e-08	2427.28	0	1.79606e-07
1874_APRLGSRSQSL_2_run0	1/sp|Q9Y2H2|SAC2_HUMAN	29776	1673.15	1.54522e-08	1673.15	0	1.7978e-07
644_KLADISINYV_2_run0	1/sp|O94822|LTN1_HUMAN	46247	4078.92	1.549e-08	4078.92	0	1.79823e-07
172_FIINGIEKV_2_run0	1/sp|Q9H9Y6|RPA2_HUMAN	58638	4084.07	1.55355e-08	4084.07	0	1.79937e-07
3565_SPQSPGDAL_2_run0	1/sp|Q96KR1|ZFR_HUMAN	977951	2100.83	1.55504e-08	2100.83	0	1.81092e-07
1239_SLPDIKVYL_2_run0	1/sp|O43566|RGS14_HUMAN	418225	4953.58	1.55775e-08	4953.58	0	1.81548e-07
73_ALLQQVHSA_2_run0	1/sp|Q86XN7|PRSR1_HUMAN	75629	2288.58	1.56003e-08	2288.58	0	1.8167e-07
664_KLFGMIIT_2_run0	1/sp|P61619|S61A1_HUMAN	93773	4655.3	1.56339e-08	4655.3	0	1.81926e-07
2354_KPFLGIGL_2_run0	1/sp|Q14974|IMB1_HUMAN	43289	4651.32	1.56779e-08	4651.32	0	1.82084e-07
169_FIFSEKPVFV_2_run0	1/sp|Q92673|SORL_HUMAN	20930	5117.09	1.57218e-08	5117.09	0	1.82312e-07
2161_GPSVLRSTL_2_run0	1/sp|O75376|NCOR1_HUMAN	282028	2798.54	1.57306e-08	2798.54	0	1.83124e-07
1960_APSLINSSSTL_2_run0	1/sp|P41252|SYIC_HUMAN	44884	3683.08	1.57555e-08	3683.08	0	1.83236e-07
707_KLLDIPGLEV_2_run0	1/sp|Q96CD2|COAC_HUMAN	25747	5352.58	1.57826e-08	5352.58	0	1.83259e-07
30_ALDSTNVEA_2_run0	1/sp|P62491|RB11A_HUMAN	67397	2045.26	1.58256e-08	2045.26	0	1.84231e-07
1069_RLIESLFTI_2_run0	1/sp|Q12789|TF3C1_HUMAN	124204	5432.22	1.58542e-08	5432.22	0	1.84877e-07
2361_KPHERKQNL_2_run0	1/sp|Q92499|DDX1_HUMAN	3721	494.522	1.59174e-08	494.522	0	1.8525e-07
503_HLAELIAEL_2_run0	1/sp|Q96F44|TRI11_HUMAN	86941	4906.5	1.59297e-08	4906.5	0	1.85555e-07
229_FLFEPVVKA_2_run0	1/sp|Q6IN85|P4R3A_HUMAN	298889	4550.74	1.59662e-08	4550.74	0	1.86305e-07
3619_SPRLTLLSL_2_run0	1/sp|Q03519|TAP2_HUMAN	90148	4947.2	1.60295e-08	4947.2	0	1.87754e-07
1260_SMADIPLGFGV_2_run0	1/sp|Q9Y221|NIP7_HUMAN	117267	5676.52	1.60534e-08	5676.52	0	1.88792e-07
1376_VLIQDVPTL_2_run0	1/sp|P48058|GRIA4_HUMAN	60328	4836.52	1.61192e-08	4836.52	0	1.89335e-07
3830_TPRPGSAESAL_2_run0	1/sp|Q9ULC8|ZDHC8_HUMAN	55772	1956.37	1.61751e-08	1956.37	0	1.9018e-07
1303_TLLPLRVFL_2_run0	1/sp|Q6NXT6|TAPT1_HUMAN	171393	6171.54	1.62001e-08	6171.54	0	1.90221e-07
1106_RLQEDLQSV_2_run0	1/sp|O75912|DGKI_HUMAN	80847	2538.28	1.62595e-08	2538.28	0	1.90934e-07
2096_GPAGPILSL_2_run0	1/sp|Q9BYG3|MK67I_HUMAN	108142	4582.77	1.63071e-08	4582.77	0	1.91014e-07
1547_YLQDKIYEV_2_run0	1/sp|Q8N8U2|CDYL2_HUMAN	26898	3386.37	1.63649e-08	3386.37	0	1.92935e-07
2629_LPRAVNTQAL_2_run0	1/sp|O60749|SNX2_HUMAN	589314	2788.15	1.6389e-08	2788.15	0	1.96131e-07
193_FLADPSAFVA_2_run0	1/sp|Q8NHW5|RLA0L_HUMAN	51664	4759.9	1.63952e-08	4759.9	0	1.96867e-07
1924_APRTLVLLL_2_run0	10/sp|P10316|1A69_HUMAN/sp|P01891|1A68_HUMAN/sp|P30457|1A66_HUMAN/sp|P30456|1A43_HUMAN/sp|P30453|1A34_HUMAN/sp|P30450|1A26_HUMAN/sp|P18462|1A25_HUMAN/sp|P05534|1A24_HUMAN/sp|P30447|1A23_HUMAN/sp|P01892|1A02_HUMAN	2360120	5124.27	1.64276e-08	5124.27	0	1.97126e-07
3476_SPKIPGIDL_2_run0	1/sp|Q15034|HERC3_HUMAN	82426	4092.5	1.6472e-08	4092.5	0	1.97143e-07
2277_IPRQQNSSV_2_run0	1/sp|O60244|MED14_HUMAN	47236	1100.87	1.65406e-08	1100.87	0	1.98407e-07
2501_KPSKVHRAL_2_run0	1/sp|O75694|NU155_HUMAN	9630	578.602	1.66284e-08	578.602	0	1.98683e-07
1479_YLAELVTPIL_2_run0	1/sp|Q04637|IF4G1_HUMAN	36079	6002.66	1.66431e-08	6002.66	0	1.98807e-07
2023_APVYMAAVI_2_run0	4/sp|O75367|H2AY_HUMAN/sp|Q9P0M6|H2AW_HUMAN/sp|Q16777|H2A2C_HUMAN/sp|Q6FI13|H2A2A_HUMAN	56501	4774.42	1.66596e-08	4774.42	0	1.99259e-07
686_KLIDKLDSL_2_run0	1/sp|Q8N1I0|DOCK4_HUMAN	130458	3469.69	1.67109e-08	3469.69	0	1.99564e-07
514_HLSIINEYL_2_run0	1/sp|P46940|IQGA1_HUMAN	201886	4602.05	1.67529e-08	4602.05	0	2.0022e-07
1678_APASPFRQL_2_run0	1/sp|Q07021|C1QBP_HUMAN	405993	3151.42	1.68071e-08	3151.42	0	2.00986e-07
607_ILYGKIIHL_2_run0	1/sp|P0CG13|CTF8_HUMAN	150123	3972.97	1.68332e-08	3972.97	0	2.01041e-07
1899_APRPPTAAP_2_run0	1/sp|Q8TF47|ZFP90_HUMAN	933843	1660.12	1.6886e-08	1660.12	0	2.01236e-07
2883_RPALPLILGL_2_run0	1/sp|Q9P2E5|CHPF2_HUMAN	40623	5906.71	1.69136e-08	5906.71	0	2.02756e-07
3643_SPRQPSGGQI_2_run0	1/sp|O14497|ARI1A_HUMAN	46918	1328.7	1.69141e-08	1328.7	0	2.03624e-07
3554_SPQKVTLYL_2_run0	1/sp|P05107|ITB2_HUMAN	837760	3678.83	1.69528e-08	3678.83	0	2.04363e-07
228_FLFDTQHFI_2_run0	1/sp|Q9H583|HEAT1_HUMAN	102955	5412.99	1.6981e-08	5412.99	0	2.05824e-07
267_FLLHIQQQV_2_run0	1/sp|O95486|SC24A_HUMAN	120098	4024.08	1.70194e-08	4024.08	0	2.07805e-07
3270_RPVAPSGTAL_2_run0	1/sp|P35658|NU214_HUMAN	714892	2091.15	1.71032e-08	2091.15	0	2.08191e-07
1849_APRGTWSTGL_2_run0	1/sp|O60828|PQBP1_HUMAN	146669	2884.47	1.72397e-08	2884.47	0	2.08274e-07
661_KLFDRPQELKL_2_run0	1/sp|Q5VZ89|DEN4C_HUMAN	18370	3499.15	1.72636e-08	3499.15	0	2.09195e-07
638_KIWDVSVNSV_2_run0	1/sp|O75083|WDR1_HUMAN	39749	3896.75	1.72751e-08	3896.75	0	2.10092e-07
1581_YMIAHITGL_2_run0	1/sp|P04818|TYSY_HUMAN	62989	4252.62	1.72809e-08	4252.62	0	2.11648e-07
1911_APRSFWMTL_2_run0	1/sp|Q9BW27|NUP85_HUMAN	23823	5050.9	1.72983e-08	5050.9	0	2.12128e-07
525_IIFVPVPQL_2_run0	1/sp|P62081|RS7_HUMAN	214413	6135.83	1.73099e-08	6135.83	0	2.12165e-07
1572_YLVSNVIEL_2_run0	1/sp|P17980|PRS6A_HUMAN	29618	5281.2	1.73206e-08	5281.2	0	2.12189e-07
270_FLLPDVIRI_2_run0	1/sp|Q9NVG8|TBC13_HUMAN	203410	6022.01	1.73452e-08	6022.01	0	2.13375e-07
2391_KPKIATANL_2_run0	1/sp|Q6NUQ4|TM214_HUMAN	52481	1753.48	1.73695e-08	1753.48	0	2.1448e-07
1421_VLVDRTIYI_2_run0	1/sp|P52758|UK114_HUMAN	275423	4045.96	1.73769e-08	4045.96	0	2.1516e-07
41_ALFPHLLQPVL_2_run0	1/sp|P55060|XPO2_HUMAN	69269	5845.92	1.74742e-08	5845.92	0	2.15205e-07
3155_RPREAEVRFL_3_run0	1/sp|Q13438|OS9_HUMAN	216478	2420.82	1.75443e-08	2420.82	0	2.16321e-07
1316_TLTEEGVIKV_2_run0	1/sp|Q9BZE4|NOG1_HUMAN	75779	3398.7	1.75849e-08	3398.7	0	2.18847e-07
3302_RPYSFFTKL_2_run0	1/sp|P82675|RT05_HUMAN	55976	3903.52	1.75926e-08	3903.52	0	2.19018e-07
2583_LPGQLKPFETL_2_run0	2/sp|GSTP1_HUMAN|/sp|P09211|GSTP1_HUMAN	41161	4506.99	1.76153e-08	4506.99	0	2.20072e-07
2251_IPMAAVKQAL_2_run0	1/sp|Q07817|B2CL1_HUMAN	56905	3421.67	1.76691e-08	3421.67	0	2.20115e-07
440_GLLRIIPYL_2_run0	1/sp|Q5T4S7|UBR4_HUMAN	19592	5900.45	1.77396e-08	5900.45	0	2.2103e-07
3647_SPRSNAGIATV_2_run0	1/sp|Q9Y6Y0|NS1BP_HUMAN	88764	1821.59	1.7793e-08	1821.59	0	2.21809e-07
1003_NMVAKVDEV_2_run0	1/sp|P62906|RL10A_HUMAN	423921	2458.89	1.78309e-08	2458.89	0	2.23472e-07
3509_SPMNHSVQM_2_run0	1/sp|Q92793|CBP_HUMAN	23510	1918.76	1.78533e-08	1918.76	0	2.2382e-07
3638_SPRPVALAL_2_run0	1/sp|Q8N201|INT1_HUMAN	167891	3478.55	1.78797e-08	3478.55	0	2.25319e-07
1693_APDIPTPVL_2_run0	1/sp|Q14667|K0100_HUMAN	67891	4502.65	1.79133e-08	4502.65	0	2.264e-07
1513_YLINEIDRI_2_run0	1/sp|Q03001|DYST_HUMAN	127825	4523.59	1.79296e-08	4523.59	0	2.26519e-07
3120_RPQGGQDIL_2_run0	1/sp|Q9Y265|RUVB1_HUMAN	2076450	1984.86	1.79889e-08	1984.86	0	2.266e-07
191_FLADAKWIL_2_run0	1/sp|Q9ULU4|PKCB1_HUMAN	34989	5338.72	1.80397e-08	5338.72	0	2.26703e-07
2746_MPSQFRDIL_2_run0	1/sp|Q09472|EP300_HUMAN	238210	4226.42	1.80675e-08	4226.42	0	2.26825e-07
2225_IPAKPPVSF_2_run0	1/sp|Q6PKC3|TXD11_HUMAN	355469	3412.7	1.8138e-08	3412.7	0	2.27798e-07
3881_VPATDRNAL_2_run0	1/sp|P60228|EIF3E_HUMAN	4210780	1693.65	1.81488e-08	1693.65	0	2.29081e-07
826_KMWEEAISL_2_run0	1/sp|Q92608|DOCK2_HUMAN	307179	4422.33	1.81894e-08	4422.33	0	2.3057e-07
2102_GPAPKGSSL_2_run0	1/sp|P35408|PE2R4_HUMAN	117154	1219.71	1.82443e-08	1219.71	0	2.31293e-07
272_FLLPHPGLQV_2_run0	1/sp|Q6DD88|ATLA3_HUMAN	317061	4705.94	1.8322e-08	4705.94	0	2.31872e-07
3594_SPRGSTDSL_2_run0	1/sp|Q9UQQ2|SH2B3_HUMAN	266952	1156.78	1.83673e-08	1156.78	0	2.32381e-07
248_FLIRNIPVI_2_run0	1/sp|Q86UD5|SL9B2_HUMAN	23986	5233.2	1.83673e-08	5233.2	0	2.3223e-07
3912_VPRAAFLSPL_2_run0	1/sp|P30040|ERP29_HUMAN	135118	4354.28	1.8376e-08	4354.28	0	2.32559e-07
1245_SLSPIYPAA_2_run0	1/sp|P18858|DNLI1_HUMAN	107487	3575.04	1.84269e-08	3575.04	0	2.3263e-07
3765_TPAMQRKKL_2_run0	1/sp|Q9UG63|ABCF2_HUMAN	42622	877.204	1.84417e-08	877.204	0	2.33706e-07
839_KVIEINPYL_2_run0	1/sp|P28074|PSB5_HUMAN	1701570	4042.25	1.84861e-08	4042.25	0	2.34924e-07
3415_SPEETRAAL_2_run0	1/sp|P78549|NTH_HUMAN	482092	1684.58	1.85268e-08	1684.58	0	2.35751e-07
2623_LPQPPRDVL_2_run0	1/sp|Q9Y3M8|STA13_HUMAN	334561	3426.44	1.85518e-08	3426.44	0	2.35804e-07
234_FLGASLKDEVL_2_run0	1/sp|P15880|RS2_HUMAN	19855	4424.41	1.86492e-08	4424.41	0	2.36208e-07
2593_LPKPPFGML_2_run0	1/sp|Q9Y2X9|ZN281_HUMAN	105211	4873.15	1.86702e-08	4873.15	0	2.37592e-07
159_AVTGILVQL_2_run0	1/sp|Q5XPI4|RN123_HUMAN	160489	6091.04	1.86977e-08	6091.04	0	2.37836e-07
2661_LPRTIFPTSTI_2_run0	1/sp|Q99590|SCAFB_HUMAN	180275	4512.81	1.87546e-08	4512.81	0	2.37863e-07
665_KLFGMIITI_2_run0	1/sp|P61619|S61A1_HUMAN	99654	5827.83	1.88263e-08	5827.83	0	2.39517e-07
2187_HPMGGLNAM_2_run0	1/sp|Q92879|CELF1_HUMAN	121451	2337.17	1.88662e-08	2337.17	0	2.39809e-07
196_FLAEHPNVTL_2_run0	1/sp|Q8IUX4|ABC3F_HUMAN	36945	3690.03	1.88811e-08	3690.03	0	2.40156e-07
1309_TLNNLEIFL_2_run0	1/sp|P52701|MSH6_HUMAN	26187	6032.15	1.89057e-08	6032.15	0	2.41232e-07
724_KLLFWVTEV_2_run0	1/sp|Q8NFH4|NUP37_HUMAN	15959	5734.63	1.89399e-08	5734.63	0	2.41269e-07
2888_RPANHRQLTF_2_run0	1/sp|Q9UNM6|PSD13_HUMAN	56962	1552.63	1.90203e-08	1552.63	0	2.42443e-07
2502_KPSLPFTSL_2_run0	1/sp|P31785|IL2RG_HUMAN	2045180	4368.98	1.91039e-08	4368.98	0	2.43808e-07
88_ALNSKILSV_2_run0	1/sp|Q96NW4|ANR27_HUMAN	64237	3407.27	1.91368e-08	3407.27	0	2.44044e-07
2682_LPSSSSSRGSL_2_run0	1/sp|P25054|APC_HUMAN	48727	1708.29	1.91804e-08	1708.29	0	2.44717e-07
3320_RVNNNRGNSL_2_run0	1/sp|Q9Y5M8|SRPRB_HUMAN	107206	720.893	1.92211e-08	720.893	0	2.44861e-07
3065_RPLGTRLGF_2_run0	1/sp|O43674|NDUB5_HUMAN	128037	2800.4	1.929e-08	2800.4	0	2.45427e-07
3873_VPAENKSVL_2_run0	1/sp|A2RUB6|CCD66_HUMAN	219594	1899.05	1.93166e-08	1899.05	0	2.46111e-07
1051_RLDDSLLYL_2_run0	1/sp|P49406|RM19_HUMAN	492413	4874.11	1.93824e-08	4874.11	0	2.46192e-07
2778_NPRDPSSSSSM(UniMod:35)_2_run0	1/sp|Q9Y6N7|ROBO1_HUMAN	17164	619.736	1.94119e-08	619.736	0	2.46818e-07
3963_WPARPALVL_2_run0	1/sp|Q86YV9|HPS6_HUMAN	28290	4549.47	1.94836e-08	4549.47	0	2.47071e-07
1821_APRAASTESL_2_run0	1/sp|O43292|GPAA1_HUMAN	62034	1587.4	1.95443e-08	1587.4	0	2.47695e-07
1901_APRPVAVAV_2_run0	1/sp|P49918|CDN1C_HUMAN	203284	2412.67	1.95556e-08	2412.67	0	2.47735e-07
2873_RPAGEPYNRKTL_3_run0	1/sp|Q9ULL5|PRR12_HUMAN	63156	1428.12	1.95731e-08	1428.12	0	2.48424e-07
1613_AAYLRALSL_2_run0	1/sp|O15294|OGT1_HUMAN	92280	4254.65	1.96485e-08	4254.65	0	2.49525e-07
1273_TLADLVHHV_2_run0	1/sp|Q9Y4A5|TRRAP_HUMAN	308148	3514.34	1.96711e-08	3514.34	0	2.49757e-07
1729_APGRHSSSL_2_run0	1/sp|Q6ZNJ1|NBEL2_HUMAN	26862	706.301	1.97024e-08	706.301	0	2.51509e-07
1734_APHARNGLSL_2_run0	1/sp|Q13422|IKZF1_HUMAN	216913	1852.77	1.97261e-08	1852.77	0	2.52054e-07
186_FIWKSGGDLTL_2_run0	1/sp|Q8TAF3|WDR48_HUMAN	26080	4775.46	1.97625e-08	4775.46	0	2.52787e-07
3419_SPEQSRNVL_2_run0	1/sp|Q96JM3|CHAP1_HUMAN	209385	1668.46	1.98194e-08	1668.46	0	2.53226e-07
2997_RPIFPGKHYL_3_run0	1/sp|P28482|MK01_HUMAN	412248	2614.61	1.9882e-08	2614.61	0	2.56509e-07
3609_SPRKTAQDTL_2_run0	1/sp|O95267|GRP1_HUMAN	101459	1045.67	1.99743e-08	1045.67	0	2.56697e-07
42_ALFPLLPKV_2_run0	1/sp|O96006|ZBED1_HUMAN	21225	5655.11	2.00167e-08	5655.11	0	2.57603e-07
693_KLIGDTPIDTFL_2_run0	1/sp|P19793|RXRA_HUMAN	120175	5348.19	2.0026e-08	5348.19	0	2.58304e-07
2914_RPAVGHSGL_2_run0	1/sp|Q8IXZ2|ZC3H3_HUMAN	59581	1216.03	2.00436e-08	1216.03	0	2.59377e-07
3497_SPLQASSAL_2_run0	1/sp|Q8TEK3|DOT1L_HUMAN	110070	2959.27	2.00797e-08	2959.27	0	2.59705e-07
2791_NPRSVTLLI_2_run0	1/sp|P40227|TCPZ_HUMAN	2512500	3992.37	2.01293e-08	3992.37	0	2.59968e-07
1324_TLYDIAHTPGV_2_run0	1/sp|P40926|MDHM_HUMAN	47633	3708.04	2.02884e-08	3708.04	0	2.60151e-07
1904_APRQDASGQSL_2_run0	1/sp|Q14324|MYPC2_HUMAN	26479	1230.16	2.03719e-08	1230.16	0	2.60711e-07
3367_SPALAAMEL_2_run0	1/sp|O75643|U520_HUMAN	65352	4445.22	2.04039e-08	4445.22	0	2.60719e-07
3197_RPRPGNILLQL_2_run0	1/sp|Q8TEL6|TP4AP_HUMAN	46308	4052.12	2.04602e-08	4052.12	0	2.6158e-07
3408_SPDTKKIAL_2_run0	1/sp|Q86TI0|TBCD1_HUMAN	46932	1915.73	2.05545e-08	1915.73	0	2.62212e-07
2822_QPNPLPLRL_2_run0	1/sp|Q15154|PCM1_HUMAN	296472	4270.6	2.0589e-08	4270.6	0	2.62353e-07
3961_VVRIITSEL_2_run0	1/sp|Q13144|EI2BE_HUMAN	43778	3708.77	2.06134e-08	3708.77	0	2.62396e-07
2455_KPRGFARGL_2_run0	2/sp|Q13185|CBX3_HUMAN/sp|P83916|CBX1_HUMAN	55617	1372.2	2.06714e-08	1372.2	0	2.64366e-07
783_KLWDISEVMV_2_run0	1/sp|Q9HBH5|RDH14_HUMAN	26695	5341.38	2.0714e-08	5341.38	0	2.65439e-07
3855_TPSPVRLHAL_2_run0	1/sp|Q3KNT7|NSN5B_HUMAN	66659	2726.25	2.0755e-08	2726.25	0	2.65596e-07
1193_SLIDKTTAA_2_run0	1/sp|P09234|RU1C_HUMAN	108107	1914.72	2.07765e-08	1914.72	0	2.66081e-07
162_FAIPMIHAV_2_run0	1/sp|Q9GZR7|DDX24_HUMAN	71962	5008.03	2.08128e-08	5008.03	0	2.67022e-07
3992_YPRFLKSDIYL_3_run0	1/sp|Q08116|RGS1_HUMAN	68377	4397.95	2.08869e-08	4397.95	0	2.68358e-07
2468_KPRPGVQML_2_run0	1/sp|Q9NSI6|BRWD1_HUMAN	45775	2071.67	2.09142e-08	2071.67	0	2.68868e-07
983_MVDGTLLLL_2_run0	1/sp|P13747|HLAE_HUMAN	338984	5912.45	2.09288e-08	5912.45	0	2.7084e-07
46_ALHSVEVEL_2_run0	1/sp|Q86XP1|DGKH_HUMAN	46718	3449.61	2.09485e-08	3449.61	0	2.71635e-07
2578_LPFKYPAVL_2_run0	1/sp|P57060|RWD2B_HUMAN	26665	4767.93	2.09768e-08	4767.93	0	2.72341e-07
699_KLIPLLLQL_2_run0	1/sp|Q5JPE7|NOMO2_HUMAN	59025	6151.86	2.10184e-08	6151.86	0	2.73027e-07
2024_APWQVVPEL_2_run0	1/sp|Q8IU68|TMC8_HUMAN	173611	5375.85	2.10376e-08	5375.85	0	2.73304e-07
3726_SPVAHRVAL_2_run0	1/sp|Q8TEZ7|MPRB_HUMAN	76310	1782.96	2.11194e-08	1782.96	0	2.74489e-07
2006_APVAPHFAL_2_run0	1/sp|Q8WU76|SCFD2_HUMAN	84184	3856.12	2.11745e-08	3856.12	0	2.74825e-07
3359_SPAIGRTSIL_2_run0	1/sp|Q9C0D2|K1731_HUMAN	77496	3179.31	2.12364e-08	3179.31	0	2.75407e-07
1969_APSPLSSSL_2_run0	1/sp|Q96B97|SH3K1_HUMAN	65043	3281.28	2.1298e-08	3281.28	0	2.7621e-07
675_KLHDVELHQV_3_run0	1/sp|O14775|GBB5_HUMAN	48383	1913.52	2.13249e-08	1913.52	0	2.76973e-07
3568_SPRAPFYRPL_3_run0	1/sp|A6NED2|RCCD1_HUMAN	98930	3020.93	2.13471e-08	3020.93	0	2.79807e-07
1643_APAPAPARSLL_2_run0	1/sp|Q6QNY0|BL1S3_HUMAN	71649	3008.3	2.14067e-08	3008.3	0	2.79927e-07
1813_APQGSRAAP_2_run0	1/sp|Q9BRP8|WIBG_HUMAN	119481	750.068	2.14404e-08	750.068	0	2.80007e-07
3683_SPSLHKLVL_2_run0	1/sp|P43897|EFTS_HUMAN	40874	3034.92	2.1452e-08	3034.92	0	2.82538e-07
770_KLSLVAAML_2_run0	1/sp|P11021|GRP78_HUMAN	27279	4858.83	2.14891e-08	4858.83	0	2.83716e-07
1981_APSQQRQQIA_2_run0	1/sp|Q6P2Q9|PRP8_HUMAN	51698	971.465	2.15288e-08	971.465	0	2.8412e-07
2677_LPSPFLRAL_2_run0	1/sp|O95456|PSMG1_HUMAN	67741	4840.48	2.16063e-08	4840.48	0	2.85413e-07
1855_APRHYTELL_2_run0	1/sp|Q8WVB6|CTF18_HUMAN	32555	2520.84	2.16148e-08	2520.84	0	2.86209e-07
3464_SPIKQSTTL_2_run0	1/sp|Q9H9E1|ANRA2_HUMAN	29398	1876.21	2.16846e-08	1876.21	0	2.86877e-07
3713_SPTGSGKSL_2_run0	1/sp|Q9BX63|FANCJ_HUMAN	52209	857.925	2.17868e-08	857.925	0	2.87181e-07
2181_HPISNNNSL_2_run0	1/sp|Q8NFD5|ARI1B_HUMAN	140400	1355.79	2.18575e-08	1355.79	0	2.88299e-07
1375_VLIPKLPQL_2_run0	1/sp|Q8N138|ORML3_HUMAN	3637070	5126.45	2.18818e-08	5126.45	0	2.88899e-07
332_FLYDTHQNL_2_run0	1/sp|P16885|PLCG2_HUMAN	62769	3280.62	2.19209e-08	3280.62	0	2.88925e-07
1900_APRPPVSAA_2_run0	1/sp|Q8TF74|WIPF2_HUMAN	425220	1644.57	2.19541e-08	1644.57	0	2.89579e-07
3264_RPTGLVVLL_2_run0	1/sp|Q6ZT12|UBR3_HUMAN	62001	4712.96	2.20329e-08	4712.96	0	2.90339e-07
535_ILAQQPLSV_2_run0	1/sp|Q6ZRI6|CO039_HUMAN	147595	3645.01	2.20946e-08	3645.01	0	2.90622e-07
214_FLDPGGPMMKL_2_run0	1/sp|Q9NXE4|NSMA3_HUMAN	55336	4684.75	2.21319e-08	4684.75	0	2.91321e-07
3537_SPNSKVNTL_2_run0	1/sp|P40939|ECHA_HUMAN	286877	1404.53	2.22243e-08	1404.53	0	2.91533e-07
1659_APAPTARNKL_2_run0	1/sp|P41218|MNDA_HUMAN	43017	1214.21	2.22931e-08	1214.21	0	2.93423e-07
2518_KPTRKFAYL_2_run0	1/sp|P40429|RL13A_HUMAN	52949	2005.07	2.23536e-08	2005.07	0	2.93968e-07
1487_YLDPAQRGV_2_run0	1/sp|Q96S19|CP013_HUMAN	262105	2280.14	2.23786e-08	2280.14	0	2.96052e-07
3908_VPNQKRLTLL_2_run0	1/sp|O60488|ACSL4_HUMAN	941630	2813.4	2.24103e-08	2813.4	0	2.96135e-07
1086_RLLEQKVEL_2_run0	1/sp|Q9H307|PININ_HUMAN	407308	2940.16	2.24941e-08	2940.16	0	2.96534e-07
3520_SPNGHRPQL_2_run0	4/sp|Q5SRD0|FA21D_HUMAN/sp|Q9Y4E1|FA21C_HUMAN/sp|Q5SNT6|FA21B_HUMAN/sp|Q641Q2|FA21A_HUMAN	194895	1175.87	2.25111e-08	1175.87	0	2.97259e-07
3340_SINAQRNAL_2_run0	1/sp|Q14669|TRIPC_HUMAN	1308140	1724.77	2.2563e-08	1724.77	0	2.98157e-07
3249_RPSQPTDQL_2_run0	1/sp|Q9Y6Q6|TNR11_HUMAN	58481	1684.75	2.26034e-08	1684.75	0	2.98997e-07
1645_APAPARSLLQL_2_run0	1/sp|Q6QNY0|BL1S3_HUMAN	36921	4100.3	2.26431e-08	4100.3	0	3.00915e-07
3335_SARAIMAQL_2_run0	2/sp|P26232|CTNA2_HUMAN/sp|P35221|CTNA1_HUMAN	128735	3215.2	2.27203e-08	3215.2	0	3.02547e-07
3414_SPEDRGSSL_2_run0	1/sp|Q76I76|SSH2_HUMAN	51411	1203.23	2.2774e-08	1203.23	0	3.02678e-07
1335_TVLDAIYEV_2_run0	1/sp|Q4W5G0|TIGD2_HUMAN	24377	4997.15	2.281e-08	4997.15	0	3.03283e-07
1515_YLIPLLER_2_run0	1/sp|P26196|DDX6_HUMAN	57326	4939.46	2.28767e-08	4939.46	0	3.03679e-07
2454_KPRGETKGM_2_run0	1/sp|Q06323|PSME1_HUMAN	6321	501.679	2.29044e-08	501.679	0	3.04106e-07
1994_APTKRKSL_2_run0	1/sp|P46013|KI67_HUMAN	94848	533.034	2.29596e-08	533.034	0	3.05736e-07
1151_SIAAVLPKV_2_run0	1/sp|Q96SA4|SERC2_HUMAN	283632	3975.4	2.3018e-08	3975.4	0	3.06043e-07
2599_LPKTGTVSL_2_run0	1/sp|P49327|FAS_HUMAN	442620	2808.43	2.30468e-08	2808.43	0	3.06767e-07
3827_TPRLPQRNL_2_run0	1/sp|O43516|WIPF1_HUMAN	93565	2084.88	2.31259e-08	2084.88	0	3.09414e-07
1528_YLLPSVVL_2_run0	1/sp|Q9NUQ2|PLCE_HUMAN	69192	5806.32	2.31916e-08	5806.32	0	3.12525e-07
367_FVYSQVVFSGKA_2_run0	1/sp|P01374|TNFB_HUMAN	29079	3994.04	2.32298e-08	3994.04	0	3.12977e-07
3459_SPIEKSGVL_2_run0	1/sp|Q8NG31|CASC5_HUMAN	281915	2334.6	2.32583e-08	2334.6	0	3.13337e-07
3531_SPNQKLLAV_2_run0	1/sp|Q9UNX4|WDR3_HUMAN	153113	2775.99	2.33253e-08	2775.99	0	3.13959e-07
3593_SPRGSGSSTSL_2_run0	1/sp|Q9H7P9|PKHG2_HUMAN	196144	1042.84	2.33774e-08	1042.84	0	3.14104e-07
1764_APKPGGLSL_2_run0	1/sp|Q8NCH0|CHSTE_HUMAN	183430	2695.96	2.34292e-08	2695.96	0	3.14115e-07
893_LLIPGLATA_2_run0	1/sp|O15239|NDUA1_HUMAN	304906	5065.87	2.34779e-08	5065.87	0	3.14157e-07
1198_SLIKQIPRI_2_run0	1/sp|P62906|RL10A_HUMAN	273693	3552.32	2.35407e-08	3552.32	0	3.15082e-07
2206_HPRSPTPTL_2_run0	1/sp|Q96HE9|PRR11_HUMAN	469553	1672.63	2.35829e-08	1672.63	0	3.17812e-07
2722_MPLPGTKAL_2_run0	1/sp|Q9UMZ2|SYNRG_HUMAN	111284	3234.97	2.36386e-08	3234.97	0	3.17884e-07
129_ALYDEVRTV_2_run0	1/sp|A6NHR9|SMHD1_HUMAN	60238	3215.8	2.37352e-08	3215.8	0	3.18649e-07
583_ILQDRLNQV_2_run0	1/sp|Q99741|CDC6_HUMAN	128532	2741.01	2.37817e-08	2741.01	0	3.18847e-07
307_FLSEHPNVTL_2_run0	1/sp|Q9UH17|ABC3B_HUMAN	66317	3639.09	2.38016e-08	3639.09	0	3.2148e-07
387_GLAPFLLNAV_2_run0	1/sp|A6NFQ2|F115C_HUMAN	8738	6063.16	2.38905e-08	6063.16	0	3.24662e-07
2123_GPKQQFSTL_2_run0	1/sp|Q2KHR3|QSER1_HUMAN	69346	2338.33	2.39518e-08	2338.33	0	3.25401e-07
328_FLWERPTLLV_2_run0	1/sp|Q6IN84|MRM1_HUMAN	18467	5638.68	2.39944e-08	5638.68	0	3.255e-07
2285_IPRVTTPLSSL_2_run0	1/sp|Q7Z7L9|ZSCA2_HUMAN	44328	4302.63	2.40328e-08	4302.63	0	3.26135e-07
208_FLDHIIASV_2_run0	1/sp|Q7LBC6|KDM3B_HUMAN	83266	4527.47	2.40558e-08	4527.47	0	3.28765e-07
1138_RMFGIPVVV_2_run0	1/sp|P11586|C1TC_HUMAN	130474	5099.16	2.41016e-08	5099.16	0	3.29258e-07
875_LLDRFLAT_2_run0	1/sp|Q14094|CCNI_HUMAN	59574	3846.49	2.41252e-08	3846.49	0	3.29476e-07
565_ILLPSVFGV_2_run0	1/sp|Q53EU6|GPAT3_HUMAN	17223	6280.75	2.43055e-08	6280.75	0	3.30494e-07
3454_SPHPETRSM_2_run0	1/sp|Q9HCE0|EPG5_HUMAN	54085	871.921	2.43744e-08	871.921	0	3.31678e-07
1829_APRDAYWIAM(UniMod:35)_2_run0	1/sp|O75794|CD123_HUMAN	160922	3236.75	2.44345e-08	3236.75	0	3.32313e-07
3668_SPSDRPLSL_2_run0	1/sp|Q12769|NU160_HUMAN	1099960	2672.81	2.44994e-08	2672.81	0	3.33033e-07
900_LLLETLPEL_2_run0	1/sp|Q13488|VPP3_HUMAN	65297	5971.22	2.45872e-08	5971.22	0	3.33066e-07
1695_APDKKKQKL_2_run0	1/sp|Q9NTJ3|SMC4_HUMAN	40645	466.277	2.46231e-08	466.277	0	3.35638e-07
1323_TLYDHVDEV_2_run0	1/sp|Q05048|CSTF1_HUMAN	28950	2868.12	2.46898e-08	2868.12	0	3.38016e-07
3832_TPRPPGPGL_2_run0	1/sp|Q8NEZ4|KMT2C_HUMAN	113296	2305.91	2.47617e-08	2305.91	0	3.39579e-07
1554_YLSDNVHLV_2_run0	1/sp|Q16543|CDC37_HUMAN	186684	3455.59	2.48263e-08	3455.59	0	3.40168e-07
3089_RPNGGPRAL_2_run0	1/sp|P17483|HXB4_HUMAN	66698	1087.31	2.49105e-08	1087.31	0	3.40522e-07
2964_RPFSPREAL_2_run0	1/sp|Q86V48|LUZP1_HUMAN	67266	2326.58	2.49967e-08	2326.58	0	3.40752e-07
1211_SLLDRFLATV_2_run0	1/sp|Q14094|CCNI_HUMAN	88201	6110.7	2.5063e-08	6110.7	0	3.41232e-07
2805_QPAAKRQKL_2_run0	1/sp|O94776|MTA2_HUMAN	88095	621.108	2.51569e-08	621.108	0	3.42533e-07
2128_GPLPRAAAL_2_run0	1/sp|Q96KG9|NTKL_HUMAN	131454	2899.9	2.53018e-08	2899.9	0	3.43573e-07
3379_SPAPPPAEV_2_run0	1/sp|Q8N3V7|SYNPO_HUMAN	49568	2183.81	2.53772e-08	2183.81	0	3.44813e-07
2686_LPSWGRAELAL_2_run0	1/sp|Q96EP0|RNF31_HUMAN	57151	4829.39	2.54993e-08	4829.39	0	3.44885e-07
2216_IAAPTSSAL_2_run0	1/sp|O43432|IF4G3_HUMAN	41915	2864.04	2.55765e-08	2864.04	0	3.45515e-07
2442_KPQPRPQTL_2_run0	1/sp|Q9NR20|DYRK4_HUMAN	126757	1205.33	2.56045e-08	1205.33	0	3.46121e-07
1623_APAGGSPRML_2_run0	1/sp|Q7L0R7|RNF44_HUMAN	117423	2047.2	2.57039e-08	2047.2	0	3.46889e-07
3755_TAAPPAQPL_2_run0	1/sp|P25440|BRD2_HUMAN	505909	2336.15	2.57519e-08	2336.15	0	3.49456e-07
3642_SPRQNKYSVL_2_run0	1/sp|O60762|DPM1_HUMAN	18093	1872.38	2.58186e-08	1872.38	0	3.49525e-07
1951_APSGGRLLSA_2_run0	1/sp|Q9NRG9|AAAS_HUMAN	391348	2090.25	2.58995e-08	2090.25	0	3.50149e-07
744_KLMGQIHQL_2_run0	1/sp|Q8TBA6|GOGA5_HUMAN	47531	2483.41	2.59042e-08	2483.41	0	3.51592e-07
2868_RPADSM(UniMod:35)LNVL_2_run0	1/sp|Q9BTL4|IER2_HUMAN	115408	3015.59	2.59549e-08	3015.59	0	3.52958e-07
1605_AARAVTGVL_2_run0	1/sp|Q9UG63|ABCF2_HUMAN	2254060	2347.23	2.59707e-08	2347.23	0	3.54918e-07
1732_APGVRAVEL_2_run0	1/sp|Q9Y508|RN114_HUMAN	818716	2843.81	2.60569e-08	2843.81	0	3.57278e-07
2017_APVQRPKL_2_run0	1/sp|Q9BZ67|FRMD8_HUMAN	95160	1656.32	2.61513e-08	1656.32	0	3.57486e-07
2132_GPNGERSAEL_2_run0	1/sp|Q7LBC6|KDM3B_HUMAN	20757	1362.25	2.62785e-08	1362.25	0	3.58231e-07
2690_LPTWRPTSM_2_run0	1/sp|Q8TB40|ABHD4_HUMAN	96557	3669.23	2.63833e-08	3669.23	0	3.58978e-07
2744_MPSLKHIVEL_2_run0	1/sp|O60518|RNBP6_HUMAN	75259	4030.05	2.64308e-08	4030.05	0	3.61124e-07
2035_AVEPGRPPL_2_run0	1/sp|Q5TA31|RN187_HUMAN	954647	2400.98	2.651e-08	2400.98	0	3.61722e-07
380_GLADKVYFL_2_run0	1/sp|P27708|PYR1_HUMAN	986307	4665.83	2.65611e-08	4665.83	0	3.63134e-07
1041_RIPAYFVTV_2_run0	1/sp|P26640|SYVC_HUMAN	104013	4370.39	2.65892e-08	4370.39	0	3.63206e-07
3981_YPKGAGEML_2_run0	1/sp|Q96DE5|APC16_HUMAN	183451	2570.34	2.66951e-08	2570.34	0	3.66015e-07
3374_SPALPGLKL_2_run0	1/sp|O14836|TR13B_HUMAN	720850	4177.03	2.68345e-08	4177.03	0	3.66509e-07
863_LLAEPVPGI_2_run0	1/sp|P61088|UBE2N_HUMAN	90470	4434.24	2.69033e-08	4434.24	0	3.67092e-07
3758_TPAEVRQVL_2_run0	1/sp|Q9H9E3|COG4_HUMAN	159209	2638.71	2.69972e-08	2638.71	0	3.67885e-07
2560_LPAPKGPAL_2_run0	1/sp|Q92733|PRCC_HUMAN	403308	2761.67	2.70138e-08	2761.67	0	3.6806e-07
3378_SPAPGRLGAM_2_run0	1/sp|Q9BTC0|DIDO1_HUMAN	187108	2286.67	2.70393e-08	2286.67	0	3.69299e-07
2788_NPRQPLPASGL_2_run0	1/sp|Q96L08|SUSD3_HUMAN	692394	2705.38	2.70581e-08	2705.38	0	3.70319e-07
2615_LPPDALVGL_2_run0	1/sp|Q15437|SC23B_HUMAN	1907470	4786.16	2.70991e-08	4786.16	0	3.70477e-07
700_KLIPQLPTL_2_run0	1/sp|Q9NQL2|RRAGD_HUMAN	1049490	4858.7	2.71564e-08	4858.7	0	3.72753e-07
1091_RLLPQVDSV_2_run0	1/sp|Q9C0B9|ZCHC2_HUMAN	192832	3444.37	2.71902e-08	3444.37	0	3.7287e-07
3485_SPKPVSSTV_2_run0	1/sp|Q9ULT8|HECD1_HUMAN	95059	1301.7	2.72133e-08	1301.7	0	3.73742e-07
3571_SPRASGSGL_2_run0	1/sp|Q8WUU4|ZN296_HUMAN	358067	994.026	2.72423e-08	994.026	0	3.77197e-07
2606_LPMGALPQGPM_2_run0	1/sp|P04233|HG2A_HUMAN	86596	4376.77	2.73078e-08	4376.77	0	3.82924e-07
2585_LPHAPGVQM(UniMod:35)_2_run0	1/sp|Q92769|HDAC2_HUMAN	611633	2097.22	2.73381e-08	2097.22	0	3.83195e-07
2229_IPAYKLETL_2_run0	1/sp|P04035|HMDH_HUMAN	52097	3763.86	2.7406e-08	3763.86	0	3.86518e-07
3407_SPDSRASSL_2_run0	1/sp|Q9UHB6|LIMA1_HUMAN	136350	1238.86	2.74706e-08	1238.86	0	3.88858e-07
2798_NVRPVPLEL_2_run0	1/sp|O75643|U520_HUMAN	1271820	3892.62	2.75112e-08	3892.62	0	3.88946e-07
1435_VLYPHEPTAV_2_run0	1/sp|Q9NYP3|DONS_HUMAN	45506	2929.59	2.75967e-08	2929.59	0	3.92729e-07
758_KLQEKIQEL_2_run0	1/sp|Q02224|CENPE_HUMAN	26359	2324.37	2.76464e-08	2324.37	0	3.93785e-07
1280_TLFDYEVRL_2_run0	1/sp|Q96T88|UHRF1_HUMAN	520953	4966.23	2.76894e-08	4966.23	0	3.99035e-07
872_LLDHVLLTL_2_run0	1/sp|Q9Y490|TLN1_HUMAN	32850	5312.7	2.77601e-08	5312.7	0	3.99438e-07
1377_VLISKLPYI_2_run0	1/sp|Q8IWF6|DEN6A_HUMAN	28790	4884.41	2.77794e-08	4884.41	0	4.00507e-07
554_ILIGYLEYV_2_run0	1/sp|Q92793|CBP_HUMAN	14417	6032.68	2.7793e-08	6032.68	0	4.05456e-07
3932_VPRPPSNPP_2_run0	1/sp|O43734|CIKS_HUMAN	131808	1903.7	2.78108e-08	1903.7	0	4.06762e-07
1898_APRPPSSSP_2_run0	1/sp|Q5H9R7|PP6R3_HUMAN	396139	1178.89	2.78365e-08	1178.89	0	4.07577e-07
456_GLSTEGIYRV_2_run0	1/sp|Q9NRY4|RHG35_HUMAN	206353	3296.81	2.78789e-08	3296.81	0	4.11525e-07
3739_SPWWRSSL_2_run0	1/sp|Q8NHM5|KDM2B_HUMAN	97745	4113.61	2.78949e-08	4113.61	0	4.1528e-07
3587_SPRGEAQKLLEL_2_run0	1/sp|Q96T58|MINT_HUMAN	41687	3624.4	2.7969e-08	3624.4	0	4.15682e-07
1135_RLYSGISGLEL_2_run0	1/sp|Q9H9Y6|RPA2_HUMAN	65902	4547.91	2.8086e-08	4547.91	0	4.17851e-07
65_ALLGGLVNV_2_run0	1/sp|Q8N4S7|PAQR4_HUMAN	29441	5308.45	2.81871e-08	5308.45	0	4.19289e-07
444_GLMEDLLKL_2_run0	1/sp|Q8WYP5|ELYS_HUMAN	25987	6082.91	2.82296e-08	6082.91	0	4.2315e-07
165_FGSAFATPFL_2_run0	1/sp|P15954|COX7C_HUMAN	29844	5815.57	2.83741e-08	5815.57	0	4.23455e-07
821_KMIEDLQNEL_2_run0	1/sp|Q8IY18|SMC5_HUMAN	36937	3697.38	2.84504e-08	3697.38	0	4.266e-07
3247_RPSQNLLQL_2_run0	1/sp|Q71SY5|MED25_HUMAN	672338	3647.87	2.8546e-08	3647.87	0	4.3082e-07
3926_VPRPASVSA_2_run0	1/sp|Q92830|KAT2A_HUMAN	132899	1645.76	2.86193e-08	1645.76	0	4.33029e-07
2183_HPKGGSTSAL_2_run0	1/sp|Q9NQG7|HPS4_HUMAN	23267	743.32	2.86562e-08	743.32	0	4.33606e-07
3612_SPRLMSNAL_2_run0	1/sp|Q9NZJ7|MTCH1_HUMAN	381264	2885.9	2.87214e-08	2885.9	0	4.33838e-07
1183_SLDQPTQTV_2_run0	1/sp|Q99613|EIF3C_HUMAN	108562	2250.57	2.88114e-08	2250.57	0	4.33999e-07
2792_NPRTKALVL_2_run0	3/sp|O95466|FMNL_HUMAN/sp|Q8IVF7|FMNL3_HUMAN/sp|Q96PY5|FMNL2_HUMAN	348294	2116.3	2.88661e-08	2116.3	0	4.35382e-07
57_ALLDKLYAL_2_run0	1/sp|Q9NV31|IMP3_HUMAN	1628820	5035.18	2.89461e-08	5035.18	0	4.35449e-07
727_KLLGSMEQV_2_run0	1/sp|Q2T9F4|IN4L2_HUMAN	44099	3027.73	2.9099e-08	3027.73	0	4.36881e-07
1099_RLMNLPLHSV_2_run0	1/sp|Q9BZQ8|NIBAN_HUMAN	48051	3588.24	2.93487e-08	3588.24	0	4.38418e-07
1247_SLVAILQSV_2_run0	1/sp|Q96BM0|I27L1_HUMAN	23519	5840.57	2.94096e-08	5840.57	0	4.39351e-07
327_FLWERPTLL_2_run0	1/sp|Q6IN84|MRM1_HUMAN	120108	5291.57	2.94362e-08	5291.57	0	4.4059e-07
1178_SLASLLVSV_2_run0	1/sp|Q15024|EXOS7_HUMAN	38905	5858.15	2.94914e-08	5858.15	0	4.40691e-07
2693_LPYKAGLSL_2_run0	1/sp|Q96P48|ARAP1_HUMAN	121929	3659.94	2.94997e-08	3659.94	0	4.41441e-07
2338_KPASFMTSI_2_run0	1/sp|P53396|ACLY_HUMAN	67082	3458.65	2.95415e-08	3458.65	0	4.41489e-07
2736_MPRIVNVTSL_2_run0	1/sp|Q8IWI9|MGAP_HUMAN	87703	4221.49	2.964e-08	4221.49	0	4.45833e-07
1049_RLAVYIDKV_2_run0	1/sp|P20700|LMNB1_HUMAN	76641	3106.1	2.9729e-08	3106.1	0	4.49896e-07
1321_TLVYHVVGV_2_run0	1/sp|Q15393|SF3B3_HUMAN	160595	3587.75	2.97506e-08	3587.75	0	4.50917e-07
3460_SPIERNEQL_2_run0	1/sp|Q9NYT6|ZN226_HUMAN	43233	1956.37	2.99251e-08	1956.37	0	4.51317e-07
1291_TLISELVQA_2_run0	1/sp|Q14999|CUL7_HUMAN	36750	5109.64	3.0072e-08	5109.64	0	4.5246e-07
2222_IPAGERPTI_2_run0	1/sp|Q96MX3|ZNF48_HUMAN	166925	2308.23	3.02086e-08	2308.23	0	4.52891e-07
2165_GVRPPAPSL_2_run0	1/sp|Q92673|SORL_HUMAN	2522810	2648.11	3.02502e-08	2648.11	0	4.53022e-07
3165_RPRGFAYVQF_2_run0	1/sp|O75494|SRS10_HUMAN	82097	3662.51	3.02829e-08	3662.51	0	4.56413e-07
1381_VLLDYHLNYL_2_run0	1/sp|Q06787|FMR1_HUMAN	29021	5073.83	3.03944e-08	5073.83	0	4.56585e-07
404_GLFSNDIPHV_2_run0	1/sp|Q8NI36|WDR36_HUMAN	40680	4465.44	3.05287e-08	4465.44	0	4.58207e-07
2553_LPAGSRVEL_2_run0	1/sp|P20023|CR2_HUMAN	306089	2747.42	3.05948e-08	2747.42	0	4.58325e-07
2402_KPKSFKVNVTL_2_run0	1/sp|Q16678|CP1B1_HUMAN	18440	2760.28	3.06521e-08	2760.28	0	4.59367e-07
1346_VLADQEVRL_2_run0	1/sp|O43566|RGS14_HUMAN	103515	3160.69	3.07607e-08	3160.69	0	4.64697e-07
2205_HPRSPNVLSVAL_2_run0	1/sp|Q16665|HIF1A_HUMAN	75911	3616.52	3.08426e-08	3616.52	0	4.66046e-07
2592_LPKIPSNATL_2_run0	1/sp|Q13451|FKBP5_HUMAN	70899	3584.2	3.09008e-08	3584.2	0	4.66829e-07
1687_APAYQRFHAL_2_run0	1/sp|Q9H211|CDT1_HUMAN	37790	2719.05	3.0979e-08	2719.05	0	4.6685e-07
1953_APSGTRVVQV_2_run0	1/sp|Q9UN70|PCDGK_HUMAN	81563	2023.35	3.10323e-08	2023.35	0	4.71296e-07
1265_SQTFVNPHV_2_run0	1/sp|Q8IV63|VRK3_HUMAN	98103	2610.41	3.10722e-08	2610.41	0	4.71767e-07
2054_FPDNQRPAL_2_run0	1/sp|P43268|ETV4_HUMAN	206025	2658.39	3.12135e-08	2658.39	0	4.72793e-07
1628_APAGTTSSRVL_2_run0	1/sp|Q96JP5|ZFP91_HUMAN	50709	1764	3.12931e-08	1764	0	4.73551e-07
559_ILLDNEFHV_2_run0	1/sp|O43353|RIPK2_HUMAN	50393	4503.11	3.13669e-08	4503.11	0	4.74083e-07
2078_FPRFGGSLAL_2_run0	1/sp|Q86YC3|NRROS_HUMAN	215405	4768.72	3.13916e-08	4768.72	0	4.77241e-07
3915_VPRAILVDL_2_run0	1/sp|Q13885|TBB2A_HUMAN	604709	4436.5	3.14555e-08	4436.5	0	4.82443e-07
3141_RPRATVMVMV_2_run0	1/sp|O75787|RENR_HUMAN	41095	2936.82	3.15401e-08	2936.82	0	4.84404e-07
2920_RPDDVHVNIRL_3_run0	5/sp|O14715|RGPD8_HUMAN/sp|Q99666|RGPD5_HUMAN/sp|Q7Z3J3|RGPD4_HUMAN/sp|A6NKT7|RGPD3_HUMAN/sp|P49792|RBP2_HUMAN	62220	3086.8	3.15893e-08	3086.8	0	4.84668e-07
3878_VPASKRPPL_2_run0	1/sp|O60682|MUSC_HUMAN	378090	1513.49	3.16593e-08	1513.49	0	4.84748e-07
423_GLKEGIPAL_2_run0	1/sp|P13639|EF2_HUMAN	266000	3583.37	3.17048e-08	3583.37	0	4.86251e-07
3397_SPAYRDLAA_2_run0	1/sp|O15492|RGS16_HUMAN	181252	2139.84	3.1752e-08	2139.84	0	4.89125e-07
1770_APKRPPSAF_2_run0	3/sp|P26583|HMGB2_HUMAN/sp|P09429|HMGB1_HUMAN/sp|B2RPK0|HGB1A_HUMAN	725217	1567.08	3.17689e-08	1567.08	0	4.89142e-07
1176_SLAQYNPKL_2_run0	2/sp|P27986|P85A_HUMAN/sp|Q92569|P55G_HUMAN	77326	3009.77	3.18644e-08	3009.77	0	4.938e-07
64_ALLGDLTKA_2_run0	1/sp|Q92973|TNPO1_HUMAN	41398	3525.08	3.19374e-08	3525.08	0	4.97539e-07
1671_APARGLLLF_2_run0	1/sp|Q9UBP0|SPAST_HUMAN	261921	4810.15	3.20065e-08	4810.15	0	5.00531e-07
2643_LPRKPVAGA_2_run0	1/sp|Q99627|CSN8_HUMAN	29317	1216.24	3.20864e-08	1216.24	0	5.00954e-07
2807_QPAPISPHL_2_run0	1/sp|Q9P1Z2|CACO1_HUMAN	87399	2877.61	3.21872e-08	2877.61	0	5.06153e-07
3560_SPQPQRAQL_2_run0	1/sp|Q9P246|STIM2_HUMAN	175770	1590.92	3.22853e-08	1590.92	0	5.0704e-07
3549_SPQGKSTSL_2_run0	1/sp|Q5SRE5|NU188_HUMAN	45117	927.479	3.23449e-08	927.479	0	5.07196e-07
1258_SLYREILFL_2_run0	1/sp|Q5VZ89|DEN4C_HUMAN	107923	5654.69	3.24802e-08	5654.69	0	5.07959e-07
1475_YLADLYHFV_2_run0	1/sp|Q9Y3L3|3BP1_HUMAN	90640	5116.08	3.26068e-08	5116.08	0	5.10078e-07
1944_APSALRVYGQYL_2_run0	1/sp|Q969Q6|P2R3C_HUMAN	22033	4324.64	3.26957e-08	4324.64	0	5.13122e-07
3935_VPRPVLRAL_2_run0	1/sp|Q9GZR7|DDX24_HUMAN	548157	2956.45	3.2751e-08	2956.45	0	5.13204e-07
2774_NPQERTLTL_2_run0	1/sp|P08238|HS90B_HUMAN	376381	2624.24	3.28563e-08	2624.24	0	5.16865e-07
2109_GPDEAKIKALL_2_run0	1/sp|O60506|HNRPQ_HUMAN	28535	3487.72	3.29493e-08	3487.72	0	5.18525e-07
3077_RPLYKNIVL_2_run0	1/sp|P61158|ARP3_HUMAN	1468420	3300.44	3.30219e-08	3300.44	0	5.20289e-07
1600_AAAPAGPRL_2_run0	1/sp|Q5FWE3|PRRT3_HUMAN	61306	1999.42	3.30331e-08	1999.42	0	5.24427e-07
261_FLLEGIRSL_2_run0	1/sp|P55160|NCKPL_HUMAN	693176	5036.17	3.31939e-08	5036.17	0	5.24724e-07
802_KLYESLLPFA_2_run0	1/sp|P42695|CNDD3_HUMAN	61326	5294.9	3.32509e-08	5294.9	0	5.30887e-07
212_FLDLGPPGI_2_run0	1/sp|Q9NWF9|RN216_HUMAN	16707	5363.7	3.33451e-08	5363.7	0	5.34393e-07
2167_HAAAYRNAL_2_run0	1/sp|P22695|QCR2_HUMAN	191900	1374.86	3.35183e-08	1374.86	0	5.35326e-07
2243_IPKFAVATL_2_run0	1/sp|P28072|PSB6_HUMAN	59179	4261.47	3.3756e-08	4261.47	0	5.39791e-07
2284_IPRVQVAQI_2_run0	1/sp|Q8NBM4|UBAC2_HUMAN	45416	3401.79	3.38557e-08	3401.79	0	5.40025e-07
1582_YMIDNVILL_2_run0	2/sp|Q8N8Y2|VA0D2_HUMAN/sp|P61421|VA0D1_HUMAN	43862	6076.42	3.39491e-08	6076.42	0	5.40962e-07
1529_YLLPSVVLL_2_run0	1/sp|Q9NUQ2|PLCE_HUMAN	517460	6518.87	3.40071e-08	6518.87	0	5.42411e-07
541_ILDISEHTL_2_run0	1/sp|Q9UBU7|DBF4A_HUMAN	66016	3769.42	3.41178e-08	3769.42	0	5.44111e-07
1669_APARAILSL_2_run0	1/sp|Q9UGH3|S23A2_HUMAN	203618	3679.52	3.42385e-08	3679.52	0	5.44533e-07
1416_VLTGILEQV_2_run0	1/sp|Q96QK1|VPS35_HUMAN	23325	4804.37	3.43207e-08	4804.37	0	5.45573e-07
2220_INAKSRAEAAL_2_run0	1/sp|Q969G3|SMCE1_HUMAN	39992	1767.61	3.43899e-08	1767.61	0	5.45946e-07
1724_APGPGRKEL_2_run0	1/sp|Q9HBH0|RHOF_HUMAN	1053130	1107.43	3.4419e-08	1107.43	0	5.46294e-07
1552_YLSAVRATL_2_run0	1/sp|P59998|ARPC4_HUMAN	68042	3236.95	3.45115e-08	3236.95	0	5.47719e-07
458_GLTEALHFV_2_run0	1/sp|P07199|CENPB_HUMAN	145920	4601.82	3.46122e-08	4601.82	0	5.48176e-07
1318_TLVDEVFRI_2_run0	1/sp|P15927|RFA2_HUMAN	60749	5356.81	3.46784e-08	5356.81	0	5.49236e-07
71_ALLPSSPTL_2_run0	1/sp|Q92994|TF3B_HUMAN	83585	4315.92	3.47221e-08	4315.92	0	5.5687e-07
998_NLVAIPVYV_2_run0	1/sp|Q9Y2T2|AP3M1_HUMAN	17082	5450.21	3.49394e-08	5450.21	0	5.57451e-07
3462_SPIHWSDRDSL_3_run0	1/sp|Q86SU0|ILDR1_HUMAN	81769	3051.64	3.50267e-08	3051.64	0	5.57665e-07
3585_SPRFPAQYL_2_run0	1/sp|Q15477|SKIV2_HUMAN	826373	3814.21	3.50546e-08	3814.21	0	5.61116e-07
1228_SLLQTQHAL_2_run0	1/sp|P53365|ARFP2_HUMAN	102432	2964.03	3.51806e-08	2964.03	0	5.66556e-07
812_KLYTGLREV_2_run0	1/sp|Q13618|CUL3_HUMAN	93363	2463.63	3.53101e-08	2463.63	0	5.69268e-07
2059_FPHLLQPVLW_2_run0	1/sp|P55060|XPO2_HUMAN	76653	5973.32	3.54306e-08	5973.32	0	5.69458e-07
2994_RPHYGSVL_2_run0	1/sp|P46940|IQGA1_HUMAN	122184	1873.83	3.55118e-08	1873.83	0	5.71008e-07
2609_LPMVPIVAL_2_run0	1/sp|Q14191|WRN_HUMAN	43172	6216.37	3.56468e-08	6216.37	0	5.72074e-07
2563_LPAPPTQNM_2_run0	2/sp|Q15532|SSXT_HUMAN/sp|O75177|CREST_HUMAN	375220	2947.93	3.5732e-08	2947.93	0	5.74177e-07
1282_TLFPVRLLV_2_run0	1/sp|Q8NF37|PCAT1_HUMAN	104940	5829.73	3.5783e-08	5829.73	0	5.75063e-07
1690_APDERRQEM_2_run0	1/sp|Q92556|ELMO1_HUMAN	19551	807.289	3.59135e-08	807.289	0	5.75697e-07
3102_RPNPITVIL_2_run0	1/sp|P35555|FBN1_HUMAN	289823	4376.48	3.6057e-08	4376.48	0	5.76259e-07
1220_SLLPAIVEL_2_run0	1/sp|P30153|2AAA_HUMAN	583887	6171.63	3.61624e-08	6171.63	0	5.76983e-07
3783_TPGPAGSRL_2_run0	1/sp|P57086|SCND1_HUMAN	88125	1692.78	3.63129e-08	1692.78	0	5.80689e-07
1664_APAQPPSQTF_2_run0	1/sp|P51825|AFF1_HUMAN	114273	2420.65	3.6456e-08	2420.65	0	5.8278e-07
2742_MPSASRVILL_2_run0	2/sp|Q14999|CUL7_HUMAN/sp|Q8IWT3|CUL9_HUMAN	232204	4193.81	3.65656e-08	4193.81	0	5.83466e-07
3231_RPSGLHGDVSL_2_run0	1/sp|Q9H6E5|STPAP_HUMAN	155993	2258.5	3.67565e-08	2258.5	0	5.85293e-07
1865_APRKPDWDL_2_run0	1/sp|Q8WUD4|CCD12_HUMAN	188566	2632.62	3.68404e-08	2632.62	0	5.88615e-07
3581_SPRELLSNSEQL_2_run0	1/sp|O14879|IFIT3_HUMAN	30583	3242.89	3.68978e-08	3242.89	0	5.88709e-07
2324_KPAESLPVI_2_run0	1/sp|Q8IWX5|SGPP2_HUMAN	273043	3428.11	3.69538e-08	3428.11	0	5.917e-07
3812_TPNENRQKL_2_run0	1/sp|Q15022|SUZ12_HUMAN	89557	830.281	3.70762e-08	830.281	0	5.93117e-07
2266_IPRGPASQF_2_run0	1/sp|P49750|YLPM1_HUMAN	112001	2481.37	3.71961e-08	2481.37	0	5.96673e-07
2496_KPSESIYSAL_2_run0	1/sp|Q6SJ93|F111B_HUMAN	129904	3278.56	3.7326e-08	3278.56	0	6.03901e-07
1870_APRKVLGSSTSA_2_run0	1/sp|Q15004|PAF15_HUMAN	38117	1109.2	3.7438e-08	1109.2	0	6.04325e-07
3566_SPRAGQLLEVL_2_run0	1/sp|Q96AP0|ACD_HUMAN	39332	4476.79	3.76821e-08	4476.79	0	6.12104e-07
3747_SVHQPWASL_2_run0	1/sp|Q15650|TRIP4_HUMAN	77423	3592.07	3.77298e-08	3592.07	0	6.1385e-07
336_FLYPFPLA_2_run0	1/sp|Q5BJD5|TM41B_HUMAN	93922	6204.94	3.77539e-08	6204.94	0	6.17143e-07
1028_QLTNVILHL_2_run0	1/sp|Q9NQG6|MID51_HUMAN	147018	4780.3	3.7839e-08	4780.3	0	6.17389e-07
688_KLIDLSQVMYL_2_run0	1/sp|Q6ZN28|MACC1_HUMAN	52300	5783.29	3.80644e-08	5783.29	0	6.20148e-07
3983_YPKRPLLGL_2_run0	1/sp|Q9GZR7|DDX24_HUMAN	387771	3302.13	3.80832e-08	3302.13	0	6.20902e-07
3446_SPGQRAVLL_2_run0	1/sp|Q12772|SRBP2_HUMAN	324222	2556.98	3.81624e-08	2556.98	0	6.21464e-07
755_KLQEEIPVL_2_run0	1/sp|Q02224|CENPE_HUMAN	116919	4062.78	3.82951e-08	4062.78	0	6.21773e-07
3670_SPSFPRPSL_2_run0	1/sp|Q92610|ZN592_HUMAN	280505	3487.57	3.84915e-08	3487.57	0	6.2237e-07
1174_SLAQYLINA_2_run0	2/sp|P57721|PCBP3_HUMAN/sp|Q15365|PCBP1_HUMAN	31112	4824.18	3.86874e-08	4824.18	0	6.23959e-07
3078_RPMDKTVVF_2_run0	1/sp|Q8NG31|CASC5_HUMAN	74447	2592.4	3.87686e-08	2592.4	0	6.25838e-07
2438_KPQGQRTSL_2_run0	1/sp|Q92547|TOPB1_HUMAN	186531	775.882	3.88719e-08	775.882	0	6.32382e-07
173_FIIQGLRSV_2_run0	1/sp|P01906|DQA2_HUMAN	2396930	4263.43	3.91319e-08	4263.43	0	6.33573e-07
3040_RPKLPEDPLL_2_run0	1/sp|P49327|FAS_HUMAN	436125	3441.56	3.92123e-08	3441.56	0	6.36257e-07
3110_RPPPPNSVI_2_run0	1/sp|Q14186|TFDP1_HUMAN	188225	2107.18	3.93796e-08	2107.18	0	6.42197e-07
3087_RPNDSRMLVAL_2_run0	1/sp|Q9UJX2|CDC23_HUMAN	76750	3308.76	3.94796e-08	3308.76	0	6.4542e-07
1040_RIIDVVYNA_2_run0	1/sp|P62241|RS8_HUMAN	533285	3419.42	3.97055e-08	3419.42	0	6.48258e-07
1966_APSNPPAHL_2_run0	1/sp|O15389|SIGL5_HUMAN	78818	1772.01	3.98325e-08	1772.01	0	6.49265e-07
2384_KPKDPKVISEL_2_run0	1/sp|Q8IUR5|TMTC1_HUMAN	29862	2166.15	4.0062e-08	2166.15	0	6.49369e-07
2483_KPRSPDHVL_2_run0	1/sp|Q9UPN3|MACF1_HUMAN	266298	1175.52	4.01528e-08	1175.52	0	6.50083e-07
2884_RPALPVLGF_2_run0	1/sp|Q6DN14|MCTP1_HUMAN	29910	4936.27	4.02241e-08	4936.27	0	6.50408e-07
366_FVYDPLVDWTA_2_run0	1/sp|Q96Q15|SMG1_HUMAN	10027	6088.75	4.03151e-08	6088.75	0	6.51504e-07
619_KFWESPETV_2_run0	1/sp|Q92922|SMRC1_HUMAN	33637	3391.05	4.03869e-08	3391.05	0	6.53876e-07
861_LLAEALNQV_2_run0	1/sp|Q05655|KPCD_HUMAN	38804	4033.47	4.0449e-08	4033.47	0	6.56764e-07
3628_SPRPGGPYL_2_run0	1/sp|Q92585|MAML1_HUMAN	262166	2413.01	4.05341e-08	2413.01	0	6.62373e-07
1952_APSGQHSQAQL_2_run0	1/sp|O00411|RPOM_HUMAN	66097	1205.2	4.06479e-08	1205.2	0	6.62914e-07
2543_KVQAGNSSL_2_run0	1/sp|Q9Y617|SERC_HUMAN	22805	1180.35	4.07739e-08	1180.35	0	6.64126e-07
3701_SPSSKYVKL_2_run0	1/sp|Q9H3F6|BACD3_HUMAN	77565	1981.44	4.0874e-08	1981.44	0	6.66612e-07
3527_SPNPARGHSV_2_run0	1/sp|P01106|MYC_HUMAN	147609	855.143	4.09426e-08	855.143	0	6.67563e-07
2105_GPAPVGRFF_2_run0	1/sp|Q8TDP1|RNH2C_HUMAN	216729	3727.03	4.10573e-08	3727.03	0	6.73066e-07
2116_GPGSKRLGI_2_run0	1/sp|Q8WYR1|PI3R5_HUMAN	50833	1571.99	4.11988e-08	1571.99	0	6.73681e-07
2960_RPFPFLMGL_2_run0	1/sp|Q13342|SP140_HUMAN	49213	6080.04	4.13005e-08	6080.04	0	6.74991e-07
1542_YLNTRLFTV_2_run0	1/sp|Q9C0B1|FTO_HUMAN	29245	4467.87	4.14027e-08	4467.87	0	6.75872e-07
1823_APRAGQPLQL_2_run0	1/sp|P25325|THTM_HUMAN	408098	2793.17	4.15192e-08	2793.17	0	6.78809e-07
1372_VLIGEFLEKV_2_run0	1/sp|O43148|MCES_HUMAN	49157	5480.9	4.15497e-08	5480.9	0	6.82365e-07
266_FLLGPRLVLA_2_run0	1/sp|P49755|TMEDA_HUMAN	152735	5408.16	4.17134e-08	5408.16	0	6.84173e-07
3095_RPNGVSAVAL_2_run0	1/sp|Q9NZ63|CI078_HUMAN	129114	2642.31	4.18675e-08	2642.31	0	6.8501e-07
3390_SPASRQAAA_2_run0	1/sp|Q86YP4|P66A_HUMAN	23345	588.283	4.20493e-08	588.283	0	6.85263e-07
2608_LPMNPRNMM_2_run0	1/sp|Q9NZN8|CNOT2_HUMAN	92254	3372.87	4.22284e-08	3372.87	0	6.85698e-07
1805_APNPYRQAIM_2_run0	1/sp|Q7RTS9|DYM_HUMAN	63328	2692.05	4.23483e-08	2692.05	0	6.88448e-07
1262_SMSADVPLV_2_run0	1/sp|P12004|PCNA_HUMAN	49002	4025.98	4.2377e-08	4025.98	0	6.89784e-07
363_FVLDKVPFL_2_run0	1/sp|Q9NQW6|ANLN_HUMAN	21136	5781.99	4.23959e-08	5781.99	0	6.9131e-07
932_LLVPTSGIYFV_2_run0	1/sp|P01374|TNFB_HUMAN	46195	6059.38	4.24786e-08	6059.38	0	6.9182e-07
2763_NPHGARLSL_2_run0	1/sp|O95801|TTC4_HUMAN	575256	1910.58	4.26135e-08	1910.58	0	6.91959e-07
337_FLYPFPLAL_2_run0	1/sp|Q5BJD5|TM41B_HUMAN	269769	7188.69	4.28275e-08	7188.69	0	6.9317e-07
3453_SPHPAATAL_2_run0	1/sp|Q643R3|LPCT4_HUMAN	281550	1737.66	4.30088e-08	1737.66	0	6.942e-07
1142_RQLEEEGITFV_2_run0	1/sp|Q92503|S14L1_HUMAN	35324	3898.59	4.32211e-08	3898.59	0	6.97291e-07
468_GLVGSLQEV_2_run0	1/sp|Q9H1A4|APC1_HUMAN	30366	3897.9	4.33072e-08	3897.9	0	7.01858e-07
99_ALRDVSEEL_2_run0	1/sp|P40222|TXLNA_HUMAN	526037	2884.18	4.34372e-08	2884.18	0	7.04572e-07
3389_SPASPKISL_2_run0	1/sp|Q8WWM7|ATX2L_HUMAN	274878	2886.62	4.36229e-08	2886.62	0	7.06074e-07
176_FILPDSLPLDTL_2_run0	1/sp|P62314|SMD1_HUMAN	76995	6614.1	4.38392e-08	6614.1	0	7.06459e-07
1797_APNAGKSTL_2_run0	1/sp|O75616|ERAL1_HUMAN	225022	1149.88	4.40137e-08	1149.88	0	7.08831e-07
2715_MPFRGYAVL_2_run0	1/sp|P49327|FAS_HUMAN	75245	4173.26	4.40576e-08	4173.26	0	7.11559e-07
889_LLIDDKGTIKL_2_run0	1/sp|P06493|CDK1_HUMAN	56823	4056.52	4.42951e-08	4056.52	0	7.18414e-07
2162_GPTEGRPQL_2_run0	1/sp|O15235|RT12_HUMAN	145809	1829.46	4.44002e-08	1829.46	0	7.25232e-07
575_ILMIFSHQI_2_run0	1/sp|Q8N3U4|STAG2_HUMAN	46852	5219.05	4.4578e-08	5219.05	0	7.25958e-07
3761_TPAFRPVSL_2_run0	1/sp|Q7RTP6|MICA3_HUMAN	67990	3675.08	4.46684e-08	3675.08	0	7.2787e-07
1672_APARPGPAA_2_run0	1/sp|Q04637|IF4G1_HUMAN	304979	1075.5	4.47775e-08	1075.5	0	7.28408e-07
1713_APFKFDMEL_2_run0	1/sp|P28482|MK01_HUMAN	22542	5021.35	4.48815e-08	5021.35	0	7.30298e-07
547_ILEEGKEILV_2_run0	1/sp|P23528|COF1_HUMAN	32818	3665.38	4.49271e-08	3665.38	0	7.32216e-07
1926_APRTVALTA_2_run0	1/sp|P04440|DPB1_HUMAN	4897680	2043.32	4.50187e-08	2043.32	0	7.38575e-07
459_GLTPFVFRL_2_run0	1/sp|Q8N3S3|PHTF2_HUMAN	18358	5810.99	4.51627e-08	5810.99	0	7.42248e-07
21_ALAPGVRAV_2_run0	1/sp|Q9Y508|RN114_HUMAN	363166	2367.18	4.52471e-08	2367.18	0	7.42368e-07
184_FIVPLTDLRIPS_2_run0	1/sp|P04114|APOB_HUMAN	116805	5991.71	4.5378e-08	5991.71	0	7.43976e-07
2622_LPQLTGPVL_2_run0	1/sp|P41229|KDM5C_HUMAN	157862	4800.53	4.5525e-08	4800.53	0	7.45835e-07
2697_LVRANTNSL_2_run0	1/sp|P51610|HCFC1_HUMAN	56659	1879.49	4.56501e-08	1879.49	0	7.47333e-07
1488_YLDPSVLSGV_2_run0	1/sp|Q15041|AR6P1_HUMAN	48881	4607.58	4.57951e-08	4607.58	0	7.47448e-07
2174_HPFPGPGLAI_2_run0	1/sp|P49915|GUAA_HUMAN	86104	4113.93	4.58969e-08	4113.93	0	7.49078e-07
903_LLLPDYYL_2_run0	1/sp|Q7KZF4|SND1_HUMAN	143590	5843.9	4.60143e-08	5843.9	0	7.52669e-07
1508_YLHSYLTYI_2_run0	1/sp|Q9UHB9|SRP68_HUMAN	33749	4500.53	4.6138e-08	4500.53	0	7.56425e-07
1085_RLLEGYEIYV_2_run0	1/sp|Q14676|MDC1_HUMAN	89253	4613.16	4.61758e-08	4613.16	0	7.57856e-07
722_KLLEVNGVAL_2_run0	1/sp|Q14160|SCRIB_HUMAN	60652	4256	4.62817e-08	4256	0	7.58565e-07
3315_RVKAPNKSL_2_run0	1/sp|O43290|SNUT1_HUMAN	43004	851.352	4.63256e-08	851.352	0	7.61003e-07
1661_APAPTVRLGL_2_run0	1/sp|P55199|ELL_HUMAN	63292	3634.23	4.64651e-08	3634.23	0	7.61158e-07
1001_NLYPFVKTV_2_run0	1/sp|P31939|PUR9_HUMAN	496581	4091.65	4.65685e-08	4091.65	0	7.63837e-07
3729_SPVLRLVL_2_run0	1/sp|O43432|IF4G3_HUMAN	17022	4721.22	4.66968e-08	4721.22	0	7.64159e-07
2005_APTVRSKAL_2_run0	1/sp|P42695|CNDD3_HUMAN	88797	1273.97	4.68348e-08	1273.97	0	7.68385e-07
982_MVDGTLLL_2_run0	1/sp|P13747|HLAE_HUMAN	113798	4806.18	4.70481e-08	4806.18	0	7.72997e-07
1481_YLAHFIEGL_2_run0	1/sp|Q9C0E2|XPO4_HUMAN	25122	4690.6	4.72025e-08	4690.6	0	7.73679e-07
2409_KPLDNASKL_2_run0	1/sp|O00186|STXB3_HUMAN	91187	1599.26	4.72689e-08	1599.26	0	7.74035e-07
473_GLWGHALLL_2_run0	1/sp|O15027|SC16A_HUMAN	163508	5392	4.74568e-08	5392	0	7.74605e-07
2605_LPLPNFSSL_2_run0	1/sp|P08670|VIME_HUMAN	48770	5633.54	4.76826e-08	5633.54	0	7.75079e-07
3919_VPRGQGSQF_2_run0	1/sp|O75807|PR15A_HUMAN	343079	1405.44	4.77267e-08	1405.44	0	7.77856e-07
1837_APREHPFVL_2_run0	1/sp|P13984|T2FB_HUMAN	952465	2730.63	4.78209e-08	2730.63	0	7.79795e-07
595_ILSQYITFV_2_run0	1/sp|Q9BZX2|UCK2_HUMAN	34946	5518.06	4.80117e-08	5518.06	0	7.79996e-07
2296_IPYHSEVPVSL_2_run0	1/sp|Q01082|SPTB2_HUMAN	1211180	3840.89	4.81891e-08	3840.89	0	7.82052e-07
2524_KPVKPHSSF_2_run0	1/sp|Q9Y520|PRC2C_HUMAN	131551	786.013	4.83999e-08	786.013	0	7.82489e-07
2863_RPAANPIQF_2_run0	1/sp|P23921|RIR1_HUMAN	1016400	3080.78	4.86124e-08	3080.78	0	7.84716e-07
1477_YLADVTNAL_2_run0	1/sp|Q5T4S7|UBR4_HUMAN	111976	4056.03	4.87908e-08	4056.03	0	7.86617e-07
2534_KPYGGSGPL_2_run0	1/sp|O75362|ZN217_HUMAN	142595	1860.4	4.89868e-08	1860.4	0	7.96213e-07
1851_APRHGLQSL_2_run0	1/sp|P48634|PRC2A_HUMAN	116281	1582.63	4.90679e-08	1582.63	0	8.04068e-07
1467_YIDDTLTMV_2_run0	1/sp|Q9H3C7|GGNB2_HUMAN	20714	4416.1	4.93263e-08	4416.1	0	8.15745e-07
3977_YPFFRGVTI_2_run0	1/sp|O75794|CD123_HUMAN	264225	4940.16	4.94567e-08	4940.16	0	8.16251e-07
3763_TPAHVRKQL_2_run0	1/sp|P78345|RPP38_HUMAN	17573	799.177	4.95821e-08	799.177	0	8.17569e-07
2460_KPRKLVNTI_2_run0	1/sp|Q92900|RENT1_HUMAN	127654	1350.55	4.97349e-08	1350.55	0	8.22798e-07
2288_IPSADRHKSKL_3_run0	1/sp|P22314|UBA1_HUMAN	79880	865.292	4.98611e-08	865.292	0	8.2353e-07
3589_SPRGGTPGSGAA_2_run0	1/sp|O14497|ARI1A_HUMAN	90322	729.693	5.02077e-08	729.693	0	8.28272e-07
33_ALFARPDLLLL_2_run0	1/sp|Q9NUQ8|ABCF3_HUMAN	15989	6087.34	5.03927e-08	6087.34	0	8.31971e-07
2047_EPCNGRTAL_2_run0	1/sp|P25963|IKBA_HUMAN	1276260	1575.36	5.04467e-08	1575.36	0	8.33146e-07
835_KVANIIAEV_2_run0	1/sp|P52306|GDS1_HUMAN	112631	3519.26	5.05177e-08	3519.26	0	8.33483e-07
703_KLISELQKL_2_run0	1/sp|Q5UIP0|RIF1_HUMAN	73645	3359.07	5.06409e-08	3359.07	0	8.44203e-07
1611_AASKERSGVSL_2_run0	3/sp|P10412|H14_HUMAN/sp|P16402|H13_HUMAN/sp|P16403|H12_HUMAN	4712980	1260.23	5.07955e-08	1260.23	0	8.533e-07
3447_SPGRPGKSV_2_run0	1/sp|Q92918|M4K1_HUMAN	31238	691.539	5.09949e-08	691.539	0	8.54531e-07
2226_IPANRSKTAM_2_run0	1/sp|Q7Z401|MYCPP_HUMAN	36175	959.224	5.10779e-08	959.224	0	8.56877e-07
2154_GPRSADEADEL_2_run0	1/sp|Q8TBE0|BAHD1_HUMAN	36964	1763.55	5.13562e-08	1763.55	0	8.59566e-07
452_GLQEGTHEL_2_run0	1/sp|O76094|SRP72_HUMAN	89849	2013.68	5.15473e-08	2013.68	0	8.62691e-07
1803_APNLKILNL_2_run0	1/sp|Q9UBU9|NXF1_HUMAN	23585	4646.93	5.16839e-08	4646.93	0	8.71661e-07
1972_APSPRPLSL_2_run0	1/sp|Q6NUT3|MFS12_HUMAN	923877	2938.03	5.18505e-08	2938.03	0	8.75718e-07
1101_RLPDLIIFL_2_run0	1/sp|Q9Y399|RT02_HUMAN	57380	6654.44	5.21562e-08	6654.44	0	8.75755e-07
3931_VPRPPSLLATL_2_run0	1/sp|Q14689|DIP2A_HUMAN	289533	4779.54	5.2236e-08	4779.54	0	8.80067e-07
2846_RADSSRASL_2_run0	1/sp|Q7Z7F7|RM55_HUMAN	56443	806.513	5.23106e-08	806.513	0	8.81968e-07
2879_RPALFANLF_2_run0	1/sp|Q9BQG0|MBB1A_HUMAN	183942	5426.21	5.24407e-08	5426.21	0	8.96164e-07
2202_HPRQEQIAL_2_run0	1/sp|Q9NZ08|ERAP1_HUMAN	39075	1926.29	5.25808e-08	1926.29	0	8.97729e-07
868_LLATVLQAV_2_run0	1/sp|O60613|SEP15_HUMAN	32472	5053.34	5.28195e-08	5053.34	0	8.99002e-07
3979_YPGFMRVAL_2_run0	1/sp|Q9BXP5|SRRT_HUMAN	36774	4693.29	5.30126e-08	4693.29	0	9.0069e-07
2955_RPFERTITM_2_run0	1/sp|O00560|SDCB1_HUMAN	201111	2535.38	5.32727e-08	2535.38	0	9.03478e-07
2497_KPSESNVTIL_2_run0	1/sp|O75530|EED_HUMAN	77659	2753.68	5.33138e-08	2753.68	0	9.17468e-07
1347_VLADQVWTL_2_run0	1/sp|O15527|OGG1_HUMAN	148721	5185.97	5.3453e-08	5185.97	0	9.18898e-07
2403_KPKSSSTAL_2_run0	1/sp|Q8WYP5|ELYS_HUMAN	144398	673.534	5.35927e-08	673.534	0	9.20995e-07
305_FLQPELVKL_2_run0	1/sp|Q14997|PSME4_HUMAN	434931	4706.05	5.39579e-08	4706.05	0	9.2592e-07
2444_KPQSKELTL_2_run0	1/sp|Q9H4H8|FA83D_HUMAN	40292	1802.3	5.40671e-08	1802.3	0	9.26669e-07
1706_APELQRHEL_2_run0	1/sp|Q8N8A6|DDX51_HUMAN	41944	1865.08	5.41931e-08	1865.08	0	9.32307e-07
939_LLYDDKGVGL_2_run0	1/sp|Q8IXT5|RB12B_HUMAN	83858	3766.2	5.43107e-08	3766.2	0	9.35747e-07
3228_RPSERPSL_2_run0	1/sp|Q86V86|PIM3_HUMAN	146649	1313.42	5.43956e-08	1313.42	0	9.38639e-07
2197_HPRHKQRQM_3_run0	1/sp|Q9P0J6|RM36_HUMAN	15116	357.554	5.479e-08	357.554	0	9.42307e-07
1840_APREPPPVEL_2_run0	1/sp|Q13105|ZBT17_HUMAN	898136	2982.19	5.48675e-08	2982.19	0	9.47036e-07
2254_IPMTGKPSL_2_run0	1/sp|Q9H9Y6|RPA2_HUMAN	78897	2774.6	5.50365e-08	2774.6	0	9.47856e-07
3754_SVRSTTRQM_2_run0	1/sp|Q7Z591|AKNA_HUMAN	13936	761.711	5.5192e-08	761.711	0	9.51828e-07
2909_RPAQVSQPF_2_run0	1/sp|Q9Y520|PRC2C_HUMAN	277314	2255.56	5.53096e-08	2255.56	0	9.59338e-07
477_GLYDGMEHLI_2_run0	1/sp|P43363|MAGAA_HUMAN	30451	4828.61	5.55302e-08	4828.61	0	9.60222e-07
1750_APINFTSRL_2_run0	1/sp|Q9Y4B6|VPRBP_HUMAN	84011	3725.92	5.56695e-08	3725.92	0	9.63757e-07
2386_KPKEADESL_2_run0	1/sp|Q9Y490|TLN1_HUMAN	262452	973.594	5.5809e-08	973.594	0	9.65244e-07
3632_SPRPPHDSSL_2_run0	1/sp|Q86VV8|RTTN_HUMAN	33430	1455.62	5.59049e-08	1455.62	0	9.66389e-07
3144_RPRDASTLGL_2_run0	1/sp|Q9NR09|BIRC6_HUMAN	23984	2136.32	5.60554e-08	2136.32	0	9.68927e-07
2802_QARKTASVL_2_run0	1/sp|O76021|RL1D1_HUMAN	71105	1073.71	5.63708e-08	1073.71	0	9.70107e-07
107_ALSQDIPEI_2_run0	1/sp|Q6P2E9|EDC4_HUMAN	117741	4277.69	5.64877e-08	4277.69	0	9.71406e-07
3255_RPSSTSSASAL_2_run0	1/sp|Q13107|UBP4_HUMAN	139095	1303.65	5.66372e-08	1303.65	0	9.72533e-07
3382_SPAPTHNSL_2_run0	1/sp|P49327|FAS_HUMAN	812627	1352.16	5.6705e-08	1352.16	0	9.75361e-07
2469_KPRPIIPML_2_run0	1/sp|O94953|KDM4B_HUMAN	544891	3923.16	5.68745e-08	3923.16	0	9.7855e-07
2831_QPRLFTMDL_2_run0	1/sp|Q9Y4A5|TRRAP_HUMAN	37490	4786.77	5.6995e-08	4786.77	0	9.81924e-07
2653_LPRPPPPEM_2_run0	1/sp|Q00325|MPCP_HUMAN	522154	2774.79	5.70741e-08	2774.79	0	9.90077e-07
3847_TPSGDKTSL_2_run0	1/sp|P08133|ANXA6_HUMAN	112322	1201.35	5.72254e-08	1201.35	0	9.90149e-07
1484_YLDASLITV_2_run0	1/sp|Q14562|DHX8_HUMAN	42492	4886.12	5.73078e-08	4886.12	0	9.92628e-07
92_ALPPVLTTV_2_run0	1/sp|Q6PKG0|LARP1_HUMAN	362399	4707.79	5.75781e-08	4707.79	0	9.93002e-07
747_KLMTALVNV_2_run0	1/sp|Q8WVM7|STAG1_HUMAN	87668	3872.92	5.76908e-08	3872.92	0	9.96964e-07
109_ALSSLIHAL_2_run0	1/sp|P13010|XRCC5_HUMAN	81472	4622.88	5.78246e-08	4622.88	0	1.01967e-06
1427_VLWDRTFSLF_2_run0	1/sp|P42224|STAT1_HUMAN	20133	6061.12	5.80597e-08	6061.12	0	1.0242e-06
1543_YLPAVFEEV_2_run0	1/sp|Q14764|MVP_HUMAN	21401	5319.77	5.81734e-08	5319.77	0	1.03515e-06
2065_FPKWSVISL_2_run0	1/sp|Q6NUS6|TECT3_HUMAN	23005	5417.58	5.82114e-08	5417.58	0	1.03781e-06
2733_MPRGVVVTL_2_run0	1/sp|Q9ULT8|HECD1_HUMAN	3143200	3730.35	5.82872e-08	3730.35	0	1.04249e-06
3720_SPTMPFLSL_2_run0	1/sp|Q8IUC6|TCAM1_HUMAN	45779	5936.29	5.84081e-08	5936.29	0	1.04527e-06
2577_LPELRRLL_2_run0	1/sp|O95872|GPAN1_HUMAN	38046	5054	5.85306e-08	5054	0	1.04677e-06
3363_SPAKKDVL_2_run0	1/sp|Q8NFH8|REPS2_HUMAN	10514	880.212	5.87076e-08	880.212	0	1.04683e-06
1115_RLSEAIVTV_2_run0	1/sp|Q5SWH9|TMM69_HUMAN	516342	3248.58	5.87942e-08	3248.58	0	1.05043e-06
148_AQYEHDLEVA_2_run0	1/sp|P62826|RAN_HUMAN	28326	2535	5.88192e-08	2535	0	1.06344e-06
1254_SLWPMTFGL_2_run0	1/sp|O75251|NDUS7_HUMAN	24175	6734.58	5.90746e-08	6734.58	0	1.06407e-06
2718_MPKKSSVVL_2_run0	1/sp|Q9UIQ6|LCAP_HUMAN	122728	1827.93	5.93026e-08	1827.93	0	1.06847e-06
79_ALMDEVVKA_2_run0	1/sp|P00558|PGK1_HUMAN	118324	3280.38	5.95994e-08	3280.38	0	1.07099e-06
1830_APRDIATGL_2_run0	1/sp|Q9BQS7|HEPH_HUMAN	130231	2495.59	5.98606e-08	2495.59	0	1.07851e-06
2237_IPIILQSAL_2_run0	1/sp|P61619|S61A1_HUMAN	13005	5449.08	5.99579e-08	5449.08	0	1.082e-06
3119_RPQEVSAYL_2_run0	1/sp|Q6NXE6|ARMC6_HUMAN	318677	3014.39	6.01037e-08	3014.39	0	1.08304e-06
3601_SPRISPATTL_2_run0	1/sp|Q8IVW6|ARI3B_HUMAN	657892	2724.18	6.01445e-08	2724.18	0	1.08435e-06
2345_KPDQQKLQAL_2_run0	1/sp|P29401|TKT_HUMAN	16522	1791.81	6.02186e-08	1791.81	0	1.09266e-06
447_GLMQEKIYI_2_run0	1/sp|P26358|DNMT1_HUMAN	93246	4156.24	6.03146e-08	4156.24	0	1.09286e-06
1556_YLSEATIGL_2_run0	1/sp|Q2TAA5|ALG11_HUMAN	18827	4322.84	6.05926e-08	4322.84	0	1.093e-06
2304_IVRKIGTNL_2_run0	1/sp|Q15390|MTFR1_HUMAN	29481	1930.93	6.08204e-08	1930.93	0	1.09424e-06
1929_APRTVLLL_2_run0	23/sp|Q31610|1B81_HUMAN/sp|P30498|1B78_HUMAN/sp|Q31612|1B73_HUMAN/sp|Q29836|1B67_HUMAN/sp|P10319|1B58_HUMAN/sp|P18465|1B57_HUMAN/sp|P30491|1B53_HUMAN/sp|P30490|1B52_HUMAN/sp|P18464|1B51_HUMAN/sp|P30488|1B50_HUMAN/sp|P30487|1B49_HUMAN/sp|P30486|1B48_HUMAN/sp|P30484|1B46_HUMAN/sp|P30483|1B45_HUMAN/sp|P30480|1B42_HUMAN/sp|P30479|1B41_HUMAN/sp|P30475|1B39_HUMAN/sp|Q95365|1B38_HUMAN/sp|P30685|1B35_HUM…	483070	3946.07	6.11516e-08	3946.07	0	1.09539e-06
3736_SPWADNTAL_2_run0	1/sp|P57076|CU059_HUMAN	159670	3560.67	6.13916e-08	3560.67	0	1.09567e-06
369_GIAELVPGV_2_run0	1/sp|Q9Y265|RUVB1_HUMAN	38413	4718.58	6.15039e-08	4718.58	0	1.0961e-06
723_KLLEVQPQV_2_run0	1/sp|Q8NDI1|EHBP1_HUMAN	94894	3214.05	6.17048e-08	3214.05	0	1.10461e-06
1452_VVAEFVPLI_2_run0	1/sp|Q9Y4A5|TRRAP_HUMAN	43819	5921.39	6.1828e-08	5921.39	0	1.10674e-06
3223_RPSAAGINL_2_run0	1/sp|Q08211|DHX9_HUMAN	871042	2646.3	6.19627e-08	2646.3	0	1.1069e-06
2818_QPKAKAKEL_2_run0	1/sp|Q14008|CKAP5_HUMAN	9134	627.118	6.23338e-08	627.118	0	1.11251e-06
1975_APSPTHVAEL_2_run0	1/sp|Q9NRS6|SNX15_HUMAN	41335	2473.76	6.2528e-08	2473.76	0	1.12035e-06
1152_SIIEYLPTL_2_run0	1/sp|Q96QE3|ATAD5_HUMAN	25408	5962.8	6.2783e-08	5962.8	0	1.12868e-06
3188_RPRLALNVM_2_run0	1/sp|Q96KA5|CLP1L_HUMAN	47778	3137.19	6.2909e-08	3137.19	0	1.1289e-06
2439_KPQKGGPL_2_run0	1/sp|Q9UNY4|TTF2_HUMAN	48395	732.299	6.30836e-08	732.299	0	1.131e-06
3846_TPSERITSL_2_run0	1/sp|Q9P253|VPS18_HUMAN	82977	2522.82	6.3202e-08	2522.82	0	1.13165e-06
3974_YPARYRPTAL_2_run0	1/sp|Q96L33|RHOV_HUMAN	46745	2325.13	6.34198e-08	2325.13	0	1.13595e-06
1294_TLLDPNEKYLL_2_run0	1/sp|Q9UHQ9|NB5R1_HUMAN	22119	4694.24	6.34879e-08	4694.24	0	1.13602e-06
295_FLPLIVNTV_2_run0	1/sp|Q709C8|VP13C_HUMAN	18252	5752.45	6.3914e-08	5752.45	0	1.14147e-06
2558_LPALPTQAL_2_run0	1/sp|Q9P2Q2|FRM4A_HUMAN	331963	4547.08	6.40745e-08	4547.08	0	1.14379e-06
467_GLVGALMHV_2_run0	1/sp|P42768|WASP_HUMAN	36004	4505.04	6.41798e-08	4505.04	0	1.14479e-06
3435_SPGGPRAAV_2_run0	1/sp|P53814|SMTN_HUMAN	148485	1218.79	6.431e-08	1218.79	0	1.14491e-06
1890_APRPDSRHHSL_3_run0	1/sp|Q9BSV6|SEN34_HUMAN	625178	789.01	6.44688e-08	789.01	0	1.14545e-06
2766_NPKESSSSL_2_run0	1/sp|Q12789|TF3C1_HUMAN	211250	943.855	6.47525e-08	943.855	0	1.15293e-06
3611_SPRLLGAAAL_2_run0	1/sp|Q9H7Z7|PGES2_HUMAN	125358	3633.19	6.49713e-08	3633.19	0	1.1636e-06
3998_YPRSILTSL_2_run0	1/sp|O15164|TIF1A_HUMAN	261237	4258.18	6.50374e-08	4258.18	0	1.16757e-06
3757_TPAEARTTTL_2_run0	1/sp|P98198|AT8B2_HUMAN	54129	1735.73	6.5258e-08	1735.73	0	1.17864e-06
1129_RLYDGLFKV_2_run0	1/sp|Q16531|DDB1_HUMAN	111221	4006.32	6.54798e-08	4006.32	0	1.18031e-06
891_LLIENVASL_2_run0	1/sp|P07203|GPX1_HUMAN	556892	5029.02	6.57221e-08	5029.02	0	1.18957e-06
3337_SARPAGDSV_2_run0	1/sp|P54198|HIRA_HUMAN	28791	824.699	6.59287e-08	824.699	0	1.19352e-06
2717_MPKKDARTL_2_run0	1/sp|P29083|T2EA_HUMAN	50048	894.781	6.6063e-08	894.781	0	1.19491e-06
1423_VLVPYEPPQV_2_run0	1/sp|Q9H3D4|P63_HUMAN	76635	4380.01	6.62095e-08	4380.01	0	1.19606e-06
552_ILFNRVLGV_2_run0	1/sp|P47712|PA24A_HUMAN	136338	4726.27	6.63342e-08	4726.27	0	1.19819e-06
3003_RPIKTATTL_2_run0	1/sp|Q96KC8|DNJC1_HUMAN	35778	1538.62	6.65402e-08	1538.62	0	1.20821e-06
201_FLASESLIKQI_2_run0	1/sp|P62906|RL10A_HUMAN	203539	4613.59	6.68262e-08	4613.59	0	1.21399e-06
3971_YPAAKRVKL_2_run0	1/sp|P01106|MYC_HUMAN	848872	1622.45	6.71623e-08	1622.45	0	1.21865e-06
495_GQFPSYLETV_2_run0	1/sp|Q86Y56|HEAT2_HUMAN	45260	4611.38	6.73774e-08	4611.38	0	1.22115e-06
2068_FPMGDRLYI_2_run0	1/sp|P49720|PSB3_HUMAN	142546	4576.02	6.76653e-08	4576.02	0	1.22255e-06
167_FIFPASNVYL_2_run0	1/sp|Q93008|USP9X_HUMAN	18466	5946.6	6.80308e-08	5946.6	0	1.22381e-06
161_FAIDPHLLLSV_2_run0	1/sp|Q29RF7|PDS5A_HUMAN	14829	6045.82	6.81303e-08	6045.82	0	1.22622e-06
3005_RPILTIITL_2_run0	1/sp|P04637|P53_HUMAN	3355860	5397.21	6.84671e-08	5397.21	0	1.22778e-06
3529_SPNQARAQA_2_run0	1/sp|P26599|PTBP1_HUMAN	168215	614.77	6.86961e-08	614.77	0	1.22918e-06
2773_NPNQNKNVAL_2_run0	1/sp|Q15717|ELAV1_HUMAN	40891	1569.34	6.89962e-08	1569.34	0	1.23556e-06
6_AIIEYMPLL_2_run0	1/sp|P30153|2AAA_HUMAN	26069	6223.63	6.9237e-08	6223.63	0	1.23698e-06
3030_RPKGESKDL_2_run0	1/sp|Q16531|DDB1_HUMAN	68059	593.652	6.95489e-08	593.652	0	1.23894e-06
2115_GPEKTRSQL_2_run0	1/sp|Q15833|STXB2_HUMAN	47259	808.707	6.97972e-08	808.707	0	1.24488e-06
1161_SIRDFLVTL_2_run0	1/sp|P23469|PTPRE_HUMAN	91560	5462.55	7.00627e-08	5462.55	0	1.24705e-06
3179_RPRHQGVMVGM_3_run0	1/sp|P62736|ACTA_HUMAN	388099	1619.95	7.01995e-08	1619.95	0	1.26763e-06
3304_RPYSPSQYAL_2_run0	1/sp|Q14494|NF2L1_HUMAN	81769	2945.19	7.03072e-08	2945.19	0	1.27279e-06
510_HLLNESPML_2_run0	1/sp|Q92621|NU205_HUMAN	294407	3573.35	7.05162e-08	3573.35	0	1.28118e-06
1795_APMLAQALEAL_2_run0	1/sp|Q96BY2|MOAP1_HUMAN	14182	6128.69	7.06082e-08	6128.69	0	1.28415e-06
1928_APRTVALTALL_2_run0	1/sp|P04440|DPB1_HUMAN	1668110	4835.62	7.07136e-08	4835.62	0	1.28535e-06
1544_YLPELLQTV_2_run0	1/sp|O14682|ENC1_HUMAN	18221	5372.97	7.0881e-08	5372.97	0	1.29045e-06
3762_TPAGVRFVSL_2_run0	1/sp|Q9H0H0|INT2_HUMAN	28074	3941.29	7.10195e-08	3941.29	0	1.29247e-06
2131_GPMNLRAAF_2_run0	1/sp|Q53S58|TM177_HUMAN	72767	3694.49	7.11611e-08	3694.49	0	1.3041e-06
2405_KPKSYSSSL_2_run0	1/sp|Q9H0H0|INT2_HUMAN	39197	1167.52	7.1368e-08	1167.52	0	1.31394e-06
223_FLFDHLLT_2_run0	1/sp|Q7L2H7|EIF3M_HUMAN	37341	5403.96	7.15394e-08	5403.96	0	1.32992e-06
1785_APLPDGRSL_2_run0	1/sp|Q15648|MED1_HUMAN	106401	2609.16	7.16012e-08	2609.16	0	1.34394e-06
1155_SIISNLITV_2_run0	1/sp|Q9C0E2|XPO4_HUMAN	17865	5730.62	7.16804e-08	5730.62	0	1.35044e-06
2342_KPATKTAEL_2_run0	1/sp|P18583|SON_HUMAN	209645	893.968	7.18508e-08	893.968	0	1.3647e-06
970_MLLDVMHTV_2_run0	1/sp|O95453|PARN_HUMAN	41042	4645.86	7.20117e-08	4645.86	0	1.36526e-06
2735_MPRHFATKL_2_run0	1/sp|O43286|B4GT5_HUMAN	29169	1931.28	7.21311e-08	1931.28	0	1.37473e-06
3383_SPAPTITSL_2_run0	1/sp|Q7Z6Z7|HUWE1_HUMAN	121136	3580.33	7.24275e-08	3580.33	0	1.37527e-06
1593_YVLPEVSKV_2_run0	1/sp|Q9UI10|EI2BD_HUMAN	75196	3663.41	7.28123e-08	3663.41	0	1.38271e-06
2797_NVRPPNTAL_2_run0	1/sp|Q17RS7|GEN_HUMAN	927437	2252.83	7.31054e-08	2252.83	0	1.38281e-06
49_ALIEGAGILL_2_run0	1/sp|Q99595|TI17A_HUMAN	40697	5536.71	7.32877e-08	5536.71	0	1.38871e-06
1357_VLFENTDSVHL_2_run0	1/sp|P42696|RBM34_HUMAN	96554	4204.92	7.33391e-08	4204.92	0	1.39004e-06
2015_APVPPPTSL_2_run0	1/sp|Q9NTJ4|MA2C1_HUMAN	405213	3151.64	7.3605e-08	3151.64	0	1.40241e-06
2148_GPRGM(UniMod:35)GTAL_2_run0	1/sp|Q99623|PHB2_HUMAN	61310	1182.48	7.36804e-08	1182.48	0	1.41012e-06
3130_RPQPVKSEL_2_run0	1/sp|Q8WYK2|JDP2_HUMAN	70311	1465.87	7.38581e-08	1465.87	0	1.41014e-06
3452_SPHGGALVM(UniMod:35)_2_run0	1/sp|Q8N201|INT1_HUMAN	128618	1296.21	7.39569e-08	1296.21	0	1.41355e-06
3132_RPQSKAPDSTL_2_run0	1/sp|O60291|MGRN1_HUMAN	24738	1211.52	7.43225e-08	1211.52	0	1.42451e-06
2708_MPALRSINL_2_run0	1/sp|Q8TCA0|LRC20_HUMAN	210712	4100.24	7.46753e-08	4100.24	0	1.42961e-06
2990_RPHSVIGGSL_2_run0	1/sp|Q00537|CDK17_HUMAN	38089	2071.3	7.50121e-08	2071.3	0	1.42991e-06
102_ALSDSIHTV_2_run0	1/sp|Q9UKN5|PRDM4_HUMAN	312039	2556.31	7.52862e-08	2556.31	0	1.43102e-06
4_AIAPIIAAV_2_run0	1/sp|Q9BQ52|RNZ2_HUMAN	362637	4781.75	7.55986e-08	4781.75	0	1.4354e-06
2270_IPRHGLQSL_2_run0	1/sp|Q5JSZ5|PRC2B_HUMAN	18242	2058.75	7.60849e-08	2058.75	0	1.43607e-06
405_GLHFVVPSV_2_run0	1/sp|Q6P1X5|TAF2_HUMAN	111658	4604.61	7.63415e-08	4604.61	0	1.43685e-06
1651_APAPPKAEA_2_run0	1/sp|P62750|RL23A_HUMAN	1240950	1270.65	7.66104e-08	1270.65	0	1.43958e-06
1396_VLMDRLPSLL_2_run0	1/sp|O60287|NPA1P_HUMAN	20699	5296.93	7.66557e-08	5296.93	0	1.44004e-06
329_FLWPGLNVPL_2_run0	1/sp|P82675|RT05_HUMAN	9885	6935.02	7.67685e-08	6935.02	0	1.44489e-06
3150_RPRDPTPSF_2_run0	1/sp|Q14137|BOP1_HUMAN	35733	1861.68	7.7236e-08	1861.68	0	1.44762e-06
2549_LARPAALTAL_2_run0	1/sp|Q8NBS9|TXND5_HUMAN	89867	3635.34	7.74264e-08	3635.34	0	1.45057e-06
3400_SPDGNRFATA_2_run0	1/sp|O75083|WDR1_HUMAN	17425	1577.84	7.76352e-08	1577.84	0	1.45236e-06
12_AIVRSLPSV_2_run0	1/sp|O14983|AT2A1_HUMAN	86369	3252.96	7.80052e-08	3252.96	0	1.46007e-06
3442_SPGPRPVL_2_run0	1/sp|Q5VV67|PPRC1_HUMAN	93623	2178.79	7.82495e-08	2178.79	0	1.46646e-06
3431_SPGARLITI_2_run0	1/sp|P21964|COMT_HUMAN	41890	3493.11	7.85896e-08	3493.11	0	1.48327e-06
3786_TPIQGTSEL_2_run0	1/sp|Q13761|RUNX3_HUMAN	551690	2747.51	7.90508e-08	2747.51	0	1.48592e-06
3058_RPKYAGYSF_2_run0	1/sp|P45983|MK08_HUMAN	71022	2478.22	7.94514e-08	2478.22	0	1.49365e-06
3735_SPVVRVAV_2_run0	1/sp|P13639|EF2_HUMAN	634812	2664.17	7.97267e-08	2664.17	0	1.49829e-06
2302_IVAKHTSAL_2_run0	1/sp|Q9Y490|TLN1_HUMAN	43187	1161.82	7.98643e-08	1161.82	0	1.50691e-06
3416_SPEGRYSAL_2_run0	1/sp|Q96RV3|PCX1_HUMAN	82300	2027.37	8.02506e-08	2027.37	0	1.52265e-06
2604_LPLLRVLSI_2_run0	1/sp|Q15345|LRC41_HUMAN	25100	5799.17	8.05731e-08	5799.17	0	1.52396e-06
1536_YLLTHPPPIM_2_run0	1/sp|Q7Z6Z7|HUWE1_HUMAN	93884	4299.63	8.08622e-08	4299.63	0	1.52786e-06
832_KQYGNEVFL_2_run0	1/sp|P50990|TCPQ_HUMAN	79181	3315.26	8.11662e-08	3315.26	0	1.53038e-06
3630_SPRPNPTSSPLL_2_run0	1/sp|P41229|KDM5C_HUMAN	59257	2945.32	8.13956e-08	2945.32	0	1.53118e-06
3200_RPRPGTGLGRVM_3_run0	1/sp|Q9BVK6|TMED9_HUMAN	798466	1826.71	8.17597e-08	1826.71	0	1.53243e-06
2188_HPMPRVNEI_2_run0	1/sp|P27708|PYR1_HUMAN	75853	2234.26	8.21515e-08	2234.26	0	1.53761e-06
2252_IPMDRSMLESM_2_run0	1/sp|Q14202|ZMYM3_HUMAN	11496	4005.6	8.2489e-08	4005.6	0	1.54556e-06
2613_LPNQARAQAAL_2_run0	1/sp|O95758|PTBP3_HUMAN	48313	2285.93	8.27591e-08	2285.93	0	1.54986e-06
1065_RLIEETQIFQ_2_run0	1/sp|Q68D86|C102B_HUMAN	38072	3740.2	8.35752e-08	3740.2	0	1.55058e-06
3727_SPVFKTVL_2_run0	1/sp|Q9HAV4|XPO5_HUMAN	71219	3586.21	8.40341e-08	3586.21	0	1.56168e-06
2840_QVRKAVDAL_2_run0	1/sp|O76021|RL1D1_HUMAN	62959	1555.19	8.43701e-08	1555.19	0	1.56213e-06
2082_FPRNNISYL_2_run0	1/sp|Q8N5M9|JAGN1_HUMAN	106136	3516.46	8.46644e-08	3516.46	0	1.58257e-06
3618_SPRLTFPSLQAL_2_run0	1/sp|Q9H6Q3|SLAP2_HUMAN	33764	5287.93	8.48662e-08	5287.93	0	1.58449e-06
1688_APAYSRAL_2_run0	1/sp|P04792|HSPB1_HUMAN	83229	2053.82	8.50107e-08	2053.82	0	1.58958e-06
1996_APTLLPEL_2_run0	1/sp|Q9H1A4|APC1_HUMAN	67825	5111.94	8.54878e-08	5111.94	0	1.59323e-06
507_HLGDFLVFL_2_run0	1/sp|Q15751|HERC1_HUMAN	68281	6503.16	8.56997e-08	6503.16	0	1.59507e-06
3807_TPMPSRPST_2_run0	1/sp|P27816|MAP4_HUMAN	73465	1630.44	8.62632e-08	1630.44	0	1.5965e-06
3088_RPNERQVAQL_3_run0	1/sp|P19878|NCF2_HUMAN	155669	1673.98	8.65781e-08	1673.98	0	1.59762e-06
3652_SPRTAVAPSAVN_2_run0	1/sp|Q9UQ35|SRRM2_HUMAN	8006	1644.92	8.68359e-08	1644.92	0	1.60897e-06
592_ILSKDGVLYV_2_run0	1/sp|Q9H1A4|APC1_HUMAN	58055	3755.5	8.70007e-08	3755.5	0	1.61084e-06
494_GMYIFLHTV_2_run0	1/sp|Q8N138|ORML3_HUMAN	21710	4897.94	8.72739e-08	4897.94	0	1.61191e-06
2380_KPKAPPPSL_2_run0	1/sp|Q9NZZ3|CHMP5_HUMAN	670340	1351.14	8.75319e-08	1351.14	0	1.61519e-06
2595_LPKPPPGVGL_2_run0	1/sp|P61129|ZC3H6_HUMAN	62430	3509.36	8.77144e-08	3509.36	0	1.62302e-06
2703_MARLGGAVL_2_run0	1/sp|P27708|PYR1_HUMAN	69937	3203.55	8.78796e-08	3203.55	0	1.63053e-06
83_ALMPVLNQV_2_run0	1/sp|Q5RKV6|EXOS6_HUMAN	696320	4794.91	8.84883e-08	4794.91	0	1.63562e-06
3584_SPREQDSESQTL_2_run0	1/sp|Q14790|CASP8_HUMAN	8778	1454.75	8.88195e-08	1454.75	0	1.64137e-06
2985_RPHLAMVL_2_run0	1/sp|O15027|SC16A_HUMAN	49069	3204.79	8.90847e-08	3204.79	0	1.64806e-06
1847_APRGQRPESAL_2_run0	1/sp|P28062|PSB8_HUMAN	94771	1288.95	8.92742e-08	1288.95	0	1.65017e-06
3229_RPSETHADYL_2_run0	1/sp|P98170|XIAP_HUMAN	37008	1722.01	8.94187e-08	1722.01	0	1.66334e-06
995_NLLPKLHIV_2_run0	1/sp|O00299|CLIC1_HUMAN	199425	4151.78	8.95649e-08	4151.78	0	1.69296e-06
3577_SPRDPVLTL_2_run0	1/sp|Q86XL3|ANKL2_HUMAN	942606	3492.8	8.97156e-08	3492.8	0	1.7034e-06
1862_APRKKLNHL_2_run0	1/sp|Q86XI2|CNDG2_HUMAN	12863	656.822	8.9903e-08	656.822	0	1.70411e-06
1558_YLSEEVQAV_2_run0	1/sp|Q53GS9|SNUT2_HUMAN	41329	3191.39	9.04419e-08	3191.39	0	1.71224e-06
[truncated: 2,675 more rows]

## Sheet: JY_25Da
Figure 3-source data 1. OpenSWATH analysis of JY cells (SWATH windows of 25 Da width each size)
Peptide	Protein	Intensity_carone_L130209_002_SW_with_dscore.csv_0_0	RT_carone_L130209_002_SW_with_dscore.csv_0_0	score_carone_L130209_002_SW_with_dscore.csv_0_0	RT_mean	RT_std	pg_pvalue
1715_APFQGDQRSL_2_run0	1/sp|Q00978|IRF9_HUMAN	88637	2053.71	1.58346e-07	2053.71	0	2.53456e-08
2449_KPRDQVVAL_2_run0	1/sp|Q9Y6N7|ROBO1_HUMAN	105503	1662.75	1.58346e-07	1662.75	0	2.10656e-08
3544_SPQAPTLQV_2_run0	1/sp|Q12772|SRBP2_HUMAN	129084	2955.88	1.58346e-07	2955.88	0	8.01415e-09
278_FLLPSEVPAL_2_run0	1/sp|Q86VV8|RTTN_HUMAN	38326	5512.87	1.58346e-07	5512.87	0	2.04816e-08
2550_LARPASAAL_2_run0	1/sp|P40926|MDHM_HUMAN	499873	1841.59	1.58346e-07	1841.59	0	8.74786e-09
542_ILDKKVEKV_2_run0	2/sp|P08238|HS90B_HUMAN/sp|Q58FF7|H90B3_HUMAN	227667	1058.25	1.58346e-07	1058.25	0	1.6619e-08
1314_TLSDLRVYL_2_run0	1/sp|Q9BYN0|SRXN1_HUMAN	530435	4455.23	1.58346e-07	4455.23	0	5.11978e-09
2761_NPEKRYNVL_2_run0	1/sp|Q1KMD3|HNRL2_HUMAN	170677	1587.63	1.58346e-07	1587.63	0	2.50102e-08
3709_SPTDRSMSSSL_2_run0	1/sp|O75448|MED24_HUMAN	35055	1744.4	1.58346e-07	1744.4	0	2.15077e-08
762_KLQEQIFHL_2_run0	1/sp|Q9NQC1|JADE2_HUMAN	49533	3450.79	1.58346e-07	3450.79	0	2.22749e-08
1292_TLISRLPAV_2_run0	1/sp|P18754|RCC1_HUMAN	87595	3681.59	1.58346e-07	3681.59	0	2.74158e-08
2745_MPSPVSPKL_2_run0	1/sp|Q9UHB7|AFF4_HUMAN	247879	2752.66	1.58346e-07	2752.66	0	2.45337e-08
2204_HPRSPNVLSV_2_run0	1/sp|Q16665|HIF1A_HUMAN	151096	1922.42	1.58346e-07	1922.42	0	2.11557e-08
3338_SASVQRADTSL_2_run0	1/sp|O76080|ZFAN5_HUMAN	50862	1495.87	1.58346e-07	1495.87	0	1.92668e-08
1009_QLAIPVSSL_2_run0	1/sp|P15260|INGR1_HUMAN	1891590	3036.7	1.58346e-07	3036.7	0	3.46012e-08
2482_KPRSLQTGF_2_run0	1/sp|Q9H0Z9|RBM38_HUMAN	163062	1458.61	1.58346e-07	1458.61	0	1.52979e-08
677_KLHGVNINV_2_run0	1/sp|Q9BQ04|RBM4B_HUMAN	318857	2217.22	1.58346e-07	2217.22	0	2.3142e-08
886_LLGPRLVLA_2_run0	1/sp|P49755|TMEDA_HUMAN	105844	3990.15	1.58346e-07	3990.15	0	1.92151e-08
845_KVLEYVIKV_2_run0	1/sp|P43355|MAGA1_HUMAN	141707	3287.04	1.58346e-07	3287.04	0	6.15322e-09
1834_APREGISQEAL_2_run0	1/sp|Q9Y490|TLN1_HUMAN	120986	2050.59	1.58346e-07	2050.59	0	8.9573e-09
1534_YLLQRAVEV_2_run0	1/sp|Q13395|TARB1_HUMAN	110433	3331.61	1.58346e-07	3331.61	0	2.1692e-08
3207_RPRPTEATVSL_2_run0	1/sp|Q92619|HMHA1_HUMAN	138443	1840.53	1.58346e-07	1840.53	0	2.60509e-08
3888_VPEEARPAL_2_run0	1/sp|Q66K64|DCA15_HUMAN	286796	1973.86	1.58346e-07	1973.86	0	3.36062e-08
2748_MPSSAVRVL_2_run0	1/sp|Q8N0X2|SPG16_HUMAN	62310	2673.87	1.58346e-07	2673.87	0	3.32443e-08
590_ILSEVQQAV_2_run0	1/sp|P09874|PARP1_HUMAN	207225	2973.59	1.58346e-07	2973.59	0	1.39833e-08
3205_RPRPSSVLRTL_3_run0	1/sp|Q9NTK1|DEPP_HUMAN	91146	1924.16	1.58346e-07	1924.16	0	1.31103e-08
2551_LIRPVSASF_2_run0	1/sp|P05496|AT5G1_HUMAN	160067	3006.7	1.58346e-07	3006.7	0	1.26204e-08
950_LM(UniMod:35)ISRTPEV_2_run0	4/sp|P01861|IGHG4_HUMAN/sp|P01860|IGHG3_HUMAN/sp|P01859|IGHG2_HUMAN/sp|P01857|IGHG1_HUMAN	252271	2516.67	1.58346e-07	2516.67	0	2.80823e-08
391_GLDDIKDLKV_2_run0	1/sp|Q9HCE1|MOV10_HUMAN	39900	3417.47	1.58346e-07	3417.47	0	1.96412e-08
3777_TPDTGRILSKL_2_run0	2/sp|P55036|PSMD4_HUMAN/sp|A2A3N6|PIPSL_HUMAN	378222	3025.62	1.58346e-07	3025.62	0	1.17117e-08
1107_RLQEDPPAGV_2_run0	1/sp|P49459|UBE2A_HUMAN	758408	1870.55	1.58346e-07	1870.55	0	1.46235e-08
2906_RPAQLHIGF_2_run0	1/sp|P22314|UBA1_HUMAN	159878	2884.82	1.58346e-07	2884.82	0	3.42448e-08
14_ALADGVQKV_2_run0	1/sp|O14791|APOL1_HUMAN	849774	1756.32	1.58346e-07	1756.32	0	1.86335e-08
476_GLWGTVVNI_2_run0	1/sp|Q86VV8|RTTN_HUMAN	28832	5357.39	1.58346e-07	5357.39	0	2.18196e-08
1399_VLMEMSYRL_2_run0	1/sp|Q6PCD5|RFWD3_HUMAN	52572	4055.46	1.58346e-07	4055.46	0	1.68216e-08
702_KLIQNVFEI_2_run0	1/sp|O00471|EXOC5_HUMAN	178039	4400.55	1.58346e-07	4400.55	0	3.44748e-08
2552_LLREVGTAL_2_run0	1/sp|Q9BZ29|DOCK9_HUMAN	145897	2817.3	1.58346e-07	2817.3	0	1.76495e-08
125_ALWDIETGQQTV_2_run0	1/sp|P62879|GBB2_HUMAN	80628	4472.62	1.58346e-07	4472.62	0	1.43934e-08
3572_SPRASMGVL_2_run0	1/sp|Q12888|TP53B_HUMAN	282972	2192.78	1.58346e-07	2192.78	0	5.85673e-09
461_GLTSTDLLFHL_2_run0	1/sp|Q14181|DPOA2_HUMAN	81747	5343.27	1.58346e-07	5343.27	0	1.97938e-09
3521_SPNGTIRNIL_2_run0	2/sp|P48735|IDHP_HUMAN/sp|O75874|IDHC_HUMAN	171615	2986.95	1.58346e-07	2986.95	0	2.66196e-08
1223_SLLPPDALVGL_2_run0	1/sp|Q15437|SC23B_HUMAN	160944	5626.12	1.58346e-07	5626.12	0	7.34897e-09
1103_RLPEIYIQL_2_run0	1/sp|Q9H223|EHD4_HUMAN	90952	4865.89	1.58346e-07	4865.89	0	1.74485e-08
543_ILDPHVVLL_2_run0	1/sp|Q99567|NUP88_HUMAN	107769	4490.59	1.58346e-07	4490.59	0	1.52212e-08
84_ALNEEAGRLLL_2_run0	1/sp|Q16763|UBE2S_HUMAN	101317	3853.64	1.58346e-07	3853.64	0	4.24891e-09
1547_YLQDKIYEV_2_run0	1/sp|Q8N8U2|CDYL2_HUMAN	28095	3103.57	1.58346e-07	3103.57	0	3.44873e-08
309_FLSELTQQL_2_run0	1/sp|P14174|MIF_HUMAN	192704	4484.36	1.58346e-07	4484.36	0	5.53514e-09
1521_YLLDQHILI_2_run0	1/sp|Q92835|SHIP1_HUMAN	64928	4694.49	1.58346e-07	4694.49	0	3.56169e-08
3532_SPNQSLRLGL_2_run0	1/sp|Q96B01|R51A1_HUMAN	136996	3181.05	1.58346e-07	3181.05	0	1.06144e-08
3416_SPEGRYSAL_2_run0	1/sp|Q96RV3|PCX1_HUMAN	76740	1757.85	1.58346e-07	1757.85	0	2.39511e-08
2061_FPIEVRHYL_2_run0	1/sp|P42229|STA5A_HUMAN	51827	3646.32	1.58346e-07	3646.32	0	3.20044e-08
1635_APALARTLQSL_2_run0	1/sp|Q96HA7|TONSL_HUMAN	153777	3855.51	1.58346e-07	3855.51	0	2.90183e-08
642_KLADDVDLEQV_2_run0	1/sp|P55072|TERA_HUMAN	74824	3177.53	1.58346e-07	3177.53	0	2.17014e-08
3899_VPKVVGSAV_2_run0	1/sp|Q9Y5A9|YTHD2_HUMAN	143567	1932.91	1.58346e-07	1932.91	0	2.59576e-08
3705_SPSVDKARAEL_2_run0	1/sp|Q9BY66|KDM5D_HUMAN	89387	1784.1	1.58346e-07	1784.1	0	1.43446e-08
3482_SPKPLVTPGSTL_2_run0	1/sp|Q9GZN2|TGIF2_HUMAN	113746	2793.03	1.58346e-07	2793.03	0	8.1029e-09
2803_QIRDIMQAL_2_run0	1/sp|Q15554|TERF2_HUMAN	64695	4028.6	1.58346e-07	4028.6	0	2.01984e-08
2486_KPRSPVVEL_2_run0	1/sp|P25098|ARBK1_HUMAN	135169	1991.06	1.58346e-07	1991.06	0	1.73707e-08
1005_NMYGKVVTV_2_run0	1/sp|O00267|SPT5H_HUMAN	114516	2574.38	1.58346e-07	2574.38	0	7.25719e-09
854_LALNEDLRSWTA_2_run0	39/sp|P01893|HLAH_HUMAN/sp|Q29865|1C18_HUMAN/sp|Q95604|1C17_HUMAN/sp|Q07000|1C15_HUMAN/sp|P30510|1C14_HUMAN/sp|P30505|1C08_HUMAN/sp|P30508|1C12_HUMAN/sp|P10321|1C07_HUMAN/sp|Q29963|1C06_HUMAN/sp|Q9TNN7|1C05_HUMAN/sp|P30504|1C04_HUMAN/sp|P04222|1C03_HUMAN/sp|P30501|1C02_HUMAN/sp|P30499|1C01_HUMAN/sp|Q31610|1B81_HUMAN/sp|Q31612|1B73_HUMAN/sp|P30486|1B48_HUMAN/sp|P30480|1B42_HUMAN/sp|P30479|1B41_HUM…	92651	4164.51	1.58346e-07	4164.51	0	5.74163e-09
2919_RPDDRSQGAII_2_run0	1/sp|Q04637|IF4G1_HUMAN	143719	1506.44	1.58346e-07	1506.44	0	3.29295e-08
1802_APNLGRSFHIL_2_run0	1/sp|Q96EE3|SEH1_HUMAN	83957	3629.4	1.58346e-07	3629.4	0	2.5621e-08
1520_YLLDLHSYL_2_run0	1/sp|O60337|MARH6_HUMAN	54045	5065.06	1.58346e-07	5065.06	0	3.0051e-08
303_FLQEHNTTL_2_run0	1/sp|Q9P219|DAPLE_HUMAN	76444	2277.14	1.58346e-07	2277.14	0	8.48388e-09
1409_VLQDIQVM(UniMod:35)L_2_run0	1/sp|P33992|MCM5_HUMAN	68764	4294.31	1.58346e-07	4294.31	0	8.06018e-09
1899_APRPPTAAP_2_run0	1/sp|Q8TF47|ZFP90_HUMAN	905146	1381.04	1.58346e-07	1381.04	0	1.99505e-08
2713_MPDVGRSMQQL_2_run0	1/sp|Q5GLZ8|HERC4_HUMAN	50576	3151.04	1.58346e-07	3151.04	0	9.65032e-09
1519_YLKDLIEEV_2_run0	1/sp|P18848|ATF4_HUMAN	104371	4185.6	1.58346e-07	4185.6	0	1.97536e-08
660_KLFDRPQEL_2_run0	1/sp|Q5VZ89|DEN4C_HUMAN	186534	2621.06	1.58346e-07	2621.06	0	1.33215e-08
90_ALPEDLVEV_2_run0	2/sp|P13797|PLST_HUMAN/sp|P13796|PLSL_HUMAN	111781	4331.16	1.58346e-07	4331.16	0	3.01646e-08
1082_RLLDYVATV_2_run0	1/sp|Q9NR09|BIRC6_HUMAN	84636	3766.81	1.58753e-07	3766.81	0	3.66912e-08
3625_SPRPALPAL_2_run0	1/sp|P05362|ICAM1_HUMAN	126217	3178.74	1.58753e-07	3178.74	0	3.68903e-08
896_LLLDMQNRL_2_run0	1/sp|Q16531|DDB1_HUMAN	100561	4016.94	1.58753e-07	4016.94	0	3.68275e-08
521_IALNEDLRSWTA_2_run0	39/sp|P01893|HLAH_HUMAN/sp|P17693|HLAG_HUMAN/sp|Q29865|1C18_HUMAN/sp|Q95604|1C17_HUMAN/sp|Q07000|1C15_HUMAN/sp|P30510|1C14_HUMAN/sp|P30505|1C08_HUMAN/sp|P30508|1C12_HUMAN/sp|P10321|1C07_HUMAN/sp|Q29963|1C06_HUMAN/sp|Q9TNN7|1C05_HUMAN/sp|P30504|1C04_HUMAN/sp|P04222|1C03_HUMAN/sp|P30501|1C02_HUMAN/sp|P30499|1C01_HUMAN/sp|Q31610|1B81_HUMAN/sp|Q31612|1B73_HUMAN/sp|P30486|1B48_HUMAN/sp|P30480|1B42_HUM…	78639	4164.51	1.59081e-07	4164.51	0	3.72814e-08
2676_LPSNERAVQTL_2_run0	1/sp|Q9NR48|ASH1L_HUMAN	33039	2267.12	1.59081e-07	2267.12	0	3.71445e-08
1954_APSGTRVVQVL_2_run0	1/sp|Q9UN70|PCDGK_HUMAN	246704	2703.95	1.60812e-07	2703.95	0	3.77685e-08
2603_LPLARVKAL_2_run0	1/sp|Q9NR33|DPOE4_HUMAN	102295	2683.43	1.6256e-07	2683.43	0	4.21325e-08
1386_VLLGHIFYV_2_run0	1/sp|Q9Y6X3|SCC4_HUMAN	86193	4975.29	1.6256e-07	4975.29	0	4.98577e-08
3977_YPFFRGVTI_2_run0	1/sp|O75794|CD123_HUMAN	179915	4628.47	1.6256e-07	4628.47	0	4.18912e-08
416_GLIDVKPLGV_2_run0	1/sp|Q8WVY7|UBCP1_HUMAN	96593	4160.47	1.6256e-07	4160.47	0	4.581e-08
823_KMMDVTVTI_2_run0	1/sp|Q5JPE7|NOMO2_HUMAN	80907	3603.01	1.6256e-07	3603.01	0	4.38064e-08
18_ALAGHQDGITFI_2_run0	1/sp|Q8TEB1|DCA11_HUMAN	106824	3740.58	1.6256e-07	3740.58	0	4.11389e-08
2670_LPSGDRVAVSV_2_run0	1/sp|Q9BRZ2|TRI56_HUMAN	107968	2620.8	1.6256e-07	2620.8	0	4.70619e-08
1157_SILEHQIQV_2_run0	1/sp|P33991|MCM4_HUMAN	161402	3114.23	1.6256e-07	3114.23	0	3.81348e-08
1118_RLSSVNAEV_2_run0	1/sp|Q14246|EMR1_HUMAN	282522	1732.91	1.6256e-07	1732.91	0	4.58358e-08
714_KLLDPEDVAVQL_2_run0	1/sp|P46939|UTRO_HUMAN	322660	4451.05	1.6256e-07	4451.05	0	4.75299e-08
3940_VPRSSSM(UniMod:35)VL_2_run0	1/sp|Q9H992|MARH7_HUMAN	271661	1534.87	1.6256e-07	1534.87	0	5.07317e-08
2283_IPRVPSLSV_2_run0	1/sp|P78345|RPP38_HUMAN	93300	3610.69	1.6256e-07	3610.69	0	3.82532e-08
67_ALLKIEGVYA_2_run0	1/sp|P18077|RL35A_HUMAN	83368	3850.48	1.6256e-07	3850.48	0	4.66294e-08
3607_SPRKPIDSL_2_run0	1/sp|Q9UQ35|SRRM2_HUMAN	150020	1470.08	1.6256e-07	1470.08	0	3.94923e-08
1588_YQVGQLYSV_2_run0	1/sp|Q00169|PIPNA_HUMAN	80242	3710.97	1.6256e-07	3710.97	0	4.33806e-08
385_GLAKAVASV_2_run0	1/sp|P57678|GEMI4_HUMAN	98361	2005.9	1.6256e-07	2005.9	0	3.97576e-08
3422_SPETRENAL_2_run0	1/sp|Q92600|RCD1_HUMAN	120629	1100.42	1.6256e-07	1100.42	0	4.29837e-08
3303_RPYSNVSNL_2_run0	1/sp|O95248|MTMR5_HUMAN	152819	1903.43	1.6256e-07	1903.43	0	3.98346e-08
482_GLYEGLTWL_2_run0	1/sp|P62330|ARF6_HUMAN	79747	5724.83	1.6256e-07	5724.83	0	4.88966e-08
2755_NPASKVIAL_2_run0	1/sp|Q00610|CLH1_HUMAN	100815	2691.4	1.6256e-07	2691.4	0	4.3008e-08
683_KLIDETQDM(UniMod:35)LL_2_run0	1/sp|Q5T4S7|UBR4_HUMAN	35925	3420.28	1.62872e-07	3420.28	0	5.2494e-08
1642_APAPAAQRL_2_run0	1/sp|Q99504|EYA3_HUMAN	475901	1399.51	1.62872e-07	1399.51	0	5.11864e-08
2368_KPHSGFHVAF_2_run0	1/sp|Q8IYU8|MICU2_HUMAN	169207	2107.64	1.62872e-07	2107.64	0	5.20112e-08
689_KLIDRTESL_2_run0	1/sp|P33241|LSP1_HUMAN	271642	1878.81	1.62872e-07	1878.81	0	5.20229e-08
350_FMVDKAIYL_2_run0	1/sp|Q8TC92|ENOX1_HUMAN	80135	4263.61	1.63217e-07	4263.61	0	5.41617e-08
413_GLIDKVNEL_2_run0	1/sp|P61011|SRP54_HUMAN	390723	3418.5	1.63757e-07	3418.5	0	5.42633e-08
1340_VEATFGVDESNAK_2_run0	1/iRT|iRT_Biognosys|iRT_Biognosys	1471680	2141.94	1.64244e-07	2141.94	0	5.5969e-08
1120_RLTPKLMEV_2_run0	1/sp|O15372|EIF3H_HUMAN	257134	2707.88	1.64244e-07	2707.88	0	5.55783e-08
653_KLDQDLNEV_2_run0	1/sp|Q9UQE7|SMC3_HUMAN	136656	2143.66	1.64244e-07	2143.66	0	5.47668e-08
3288_RPWSNSRGL_2_run0	1/sp|Q9NRR8|C42S1_HUMAN	101918	1484.57	1.64244e-07	1484.57	0	5.57131e-08
1949_APSEYRYTLL_2_run0	1/sp|Q9BS26|ERP44_HUMAN	128866	3479.9	1.64244e-07	3479.9	0	5.57356e-08
2515_KPTDKLRAL_2_run0	2/sp|Q6P474|PDXD2_HUMAN/sp|Q6P996|PDXD1_HUMAN	139596	1453.75	1.6498e-07	1453.75	0	5.60309e-08
368_GAGSSEPVTGLDAK_2_run0	1/iRT|iRT_Biognosys|iRT_Biognosys	1339600	1738.28	1.66463e-07	1738.28	0	5.72661e-08
3598_SPRHSFNNL_2_run0	1/sp|Q01201|RELB_HUMAN	50911	1310.31	1.68777e-07	1310.31	0	5.75032e-08
2220_INAKSRAEAAL_2_run0	1/sp|Q969G3|SMCE1_HUMAN	29480	1484.72	1.69142e-07	1484.72	0	5.77498e-08
1749_APILKRAL_2_run0	1/sp|Q9ULQ0|STRP2_HUMAN	137631	1786.43	1.69651e-07	1786.43	0	5.78178e-08
115_ALVDHVAEL_2_run0	1/sp|B0I1T2|MYO1G_HUMAN	398057	3146.21	1.71118e-07	3146.21	0	6.14351e-08
2571_LPAWPHRGL_2_run0	1/sp|Q96P11|NSUN5_HUMAN	314892	2926.33	1.71118e-07	2926.33	0	6.04201e-08
2263_IPRDPSQQEL_2_run0	1/sp|P49327|FAS_HUMAN	149093	1955.01	1.71118e-07	1955.01	0	6.09297e-08
1199_SLINVGLISV_2_run0	1/sp|Q92688|AN32B_HUMAN	201306	5539.52	1.71118e-07	5539.52	0	6.05547e-08
3960_VVKPPGSSL_2_run0	1/sp|Q92560|BAP1_HUMAN	1756150	1802.63	1.71118e-07	1802.63	0	6.19716e-08
1042_RISDVHFSV_2_run0	1/sp|O95503|CBX6_HUMAN	160289	2795.47	1.71118e-07	2795.47	0	6.05743e-08
228_FLFDTQHFI_2_run0	1/sp|Q9H583|HEAT1_HUMAN	73296	5092.43	1.71131e-07	5092.43	0	6.26371e-08
3818_TPRDLVLRSL_2_run0	1/sp|B0I1T2|MYO1G_HUMAN	64510	3237.51	1.71604e-07	3237.51	0	6.35135e-08
2781_NPRKHITSL_2_run0	1/sp|Q6P1K8|T2H2L_HUMAN	161251	669.814	1.73516e-07	669.814	0	6.50391e-08
1611_AASKERSGVSL_2_run0	3/sp|P10412|H14_HUMAN/sp|P16402|H13_HUMAN/sp|P16403|H12_HUMAN	1757830	938.218	1.73923e-07	938.218	0	6.50905e-08
1166_SLADLQNDEV_2_run0	1/sp|P61247|RS3A_HUMAN	71457	3144.71	1.75813e-07	3144.71	0	6.53665e-08
789_KLWEMDNM(UniMod:35)LI_2_run0	1/sp|Q9Y605|MOFA1_HUMAN	56005	4454.57	1.76108e-07	4454.57	0	6.82136e-08
17_ALAEIAKAEL_2_run0	1/sp|P23246|SFPQ_HUMAN	253514	3338.57	1.76108e-07	3338.57	0	6.56091e-08
1109_RLQEEINEV_2_run0	1/sp|Q70UQ0|IKIP_HUMAN	143057	2218.66	1.76108e-07	2218.66	0	6.83743e-08
452_GLQEGTHEL_2_run0	1/sp|O76094|SRP72_HUMAN	73068	1730.41	1.76109e-07	1730.41	0	7.02187e-08
2642_LPRKHIQGL_2_run0	1/sp|P41214|EIF2D_HUMAN	66917	1236.87	1.77255e-07	1236.87	0	7.07379e-08
855_LFLQFGAQGSPFLK_2_run0	1/iRT|iRT_Biognosys|iRT_Biognosys	39775	5190.48	1.78366e-07	5190.48	0	7.12551e-08
2572_LPDERTISL_2_run0	1/sp|Q05048|CSTF1_HUMAN	566643	3167.86	1.78585e-07	3167.86	0	7.12991e-08
1752_APIQGNREEL_2_run0	1/sp|Q13435|SF3B2_HUMAN	90134	1696.77	1.79725e-07	1696.77	0	7.13935e-08
3448_SPGSPRPAL_2_run0	1/sp|Q9H211|CDT1_HUMAN	132179	1523.61	1.80113e-07	1523.61	0	7.2429e-08
3727_SPVFKTVL_2_run0	1/sp|Q9HAV4|XPO5_HUMAN	58943	3251.8	1.80113e-07	3251.8	0	7.57815e-08
3270_RPVAPSGTAL_2_run0	1/sp|P35658|NU214_HUMAN	439863	1798.56	1.80444e-07	1798.56	0	7.61704e-08
1356_VLFEKEVNEV_2_run0	1/sp|Q9BZQ8|NIBAN_HUMAN	42658	3185.99	1.80961e-07	3185.99	0	7.71471e-08
963_MLFGHPLLV_2_run0	1/sp|P51784|UBP11_HUMAN	46005	4723.4	1.80961e-07	4723.4	0	7.64041e-08
1116_RLSEFIPAVF_2_run0	1/sp|Q12768|STRUM_HUMAN	57940	5103.31	1.82152e-07	5103.31	0	7.75735e-08
707_KLLDIPGLEV_2_run0	1/sp|Q96CD2|COAC_HUMAN	17599	5043.49	1.82152e-07	5043.49	0	7.75421e-08
2668_LPSDLRTISL_2_run0	1/sp|Q9C0A6|SETD5_HUMAN	210131	3993.9	1.82861e-07	3993.9	0	7.75842e-08
1525_YLLLKTHQL_2_run0	1/sp|Q5JVF3|PCID2_HUMAN	57818	2936.7	1.8338e-07	2936.7	0	7.76984e-08
1054_RLFDEPQLASL_2_run0	1/sp|Q9H0C5|BTBD1_HUMAN	84352	4358.95	1.83774e-07	4358.95	0	7.7918e-08
788_KLWEMDNM(UniMod:35)L_2_run0	1/sp|Q9Y605|MOFA1_HUMAN	61360	3713.66	1.85135e-07	3713.66	0	7.91161e-08
2219_IIRENSISL_2_run0	1/sp|Q9H1A4|APC1_HUMAN	192028	2874.72	1.85527e-07	2874.72	0	7.96133e-08
651_KLAENIDAQL_2_run0	1/sp|P37198|NUP62_HUMAN	262956	2851	1.86423e-07	2851	0	8.03366e-08
2039_AVRKPAISL_2_run0	1/sp|Q5VSL9|STRP1_HUMAN	134802	2065.19	1.87273e-07	2065.19	0	8.04079e-08
1083_RLLDYVVNI_2_run0	1/sp|Q63ZY3|KANK2_HUMAN	164346	4590.6	1.89307e-07	4590.6	0	8.28639e-08
2269_IPRGVNVSAL_2_run0	1/sp|P38606|VATA_HUMAN	297457	2998.45	1.89386e-07	2998.45	0	8.29351e-08
2898_RPAPPAQSL_2_run0	1/sp|O95208|EPN2_HUMAN	112828	1522.51	1.90436e-07	1522.51	0	8.3326e-08
1127_RLWNETVEL_2_run0	1/sp|Q8WUY9|DEP1B_HUMAN	156764	3870.75	1.90509e-07	3870.75	0	8.51599e-08
2295_IPYGERITL_2_run0	1/sp|P49750|YLPM1_HUMAN	162961	3428.72	1.91064e-07	3428.72	0	8.54852e-08
3550_SPQGRVMTI_2_run0	1/sp|Q15365|PCBP1_HUMAN	266403	2097.76	1.93741e-07	2097.76	0	8.5678e-08
1328_TPVISGGPYEYR_2_run0	1/iRT|iRT_Biognosys|iRT_Biognosys	1103670	2792.23	1.94222e-07	2792.23	0	8.56925e-08
662_KLFDTQQFL_2_run0	1/sp|Q15306|IRF4_HUMAN	143905	4233.95	1.95003e-07	4233.95	0	8.5965e-08
1946_APSDNRVTSF_2_run0	1/sp|Q9UNZ2|NSF1C_HUMAN	66109	1866.49	1.95598e-07	1866.49	0	8.66195e-08
1086_RLLEQKVEL_2_run0	1/sp|Q9H307|PININ_HUMAN	256843	2616.63	1.95718e-07	2616.63	0	8.81878e-08
325_FLWDEGFHQL_2_run0	1/sp|Q13724|MOGS_HUMAN	126033	5066	1.97165e-07	5066	0	8.88301e-08
2001_APTPIQALTL_2_run0	1/sp|Q9GZR7|DDX24_HUMAN	129883	4674.85	1.97696e-07	4674.85	0	9.16354e-08
1853_APRHPSTNSLL_2_run0	1/sp|Q9P032|NDUF4_HUMAN	73220	1693.52	1.98656e-07	1693.52	0	9.31037e-08
561_ILLEHIIM_2_run0	1/sp|Q9Y6X3|SCC4_HUMAN	54592	4540.83	1.98656e-07	4540.83	0	9.2897e-08
412_GLIDHQTYL_2_run0	1/sp|Q15149|PLEC_HUMAN	118734	3170.57	1.98724e-07	3170.57	0	9.31271e-08
2224_IPAKLHNSL_2_run0	1/sp|Q00341|VIGLN_HUMAN	285276	1616.27	1.99944e-07	1616.27	0	9.32314e-08
3479_SPKLPVSSL_2_run0	1/sp|Q99856|ARI3A_HUMAN	1896950	3036.7	1.99944e-07	3036.7	0	9.33055e-08
1956_APSKPAASI_2_run0	1/sp|O60264|SMCA5_HUMAN	152545	1248.95	2.00259e-07	1248.95	0	9.34158e-08
1325_TLYEAVREV_2_run0	1/sp|P62906|RL10A_HUMAN	514350	2954.3	2.0077e-07	2954.3	0	9.5452e-08
2672_LPSKPSSTL_2_run0	1/sp|Q9UNF0|PACN2_HUMAN	586067	1792.98	2.0086e-07	1792.98	0	9.61247e-08
927_LLQDKQFEL_2_run0	1/sp|Q96JC1|VPS39_HUMAN	113994	3572.07	2.0086e-07	3572.07	0	9.57799e-08
113_ALTPVVVTL_2_run0	1/sp|P11802|CDK4_HUMAN	86223	4659.6	2.0086e-07	4659.6	0	9.63106e-08
3771_TPAVGRLEV_2_run0	1/sp|Q53HL2|BOREA_HUMAN	1387500	2686.12	2.01886e-07	2686.12	0	1.01188e-07
2809_QPDQTRIVAL_2_run0	1/sp|P22087|FBRL_HUMAN	388465	2780.4	2.02388e-07	2780.4	0	1.01207e-07
3753_SVRPLVTEL_2_run0	1/sp|P57740|NU107_HUMAN	259068	3259.05	2.03039e-07	3259.05	0	1.02068e-07
2084_FPRVYGVSL_2_run0	1/sp|Q9Y3L3|3BP1_HUMAN	209168	4176.64	2.032e-07	4176.64	0	1.02695e-07
2276_IPRPVDGVEV_2_run0	1/sp|P26368|U2AF2_HUMAN	486136	2818.22	2.032e-07	2818.22	0	1.04074e-07
3746_SPYQNIKIL_2_run0	1/sp|P52788|SPSY_HUMAN	129929	3492.5	2.03859e-07	3492.5	0	1.07492e-07
2493_KPRVTPVEV_2_run0	1/sp|Q8N7H5|PAF1_HUMAN	124720	1552.19	2.03859e-07	1552.19	0	1.07836e-07
3395_SPAVERLISSL_2_run0	1/sp|Q9BQ52|RNZ2_HUMAN	433413	4764.47	2.04427e-07	4764.47	0	1.09808e-07
3346_SPADHRGYASL_2_run0	1/sp|Q06945|SOX4_HUMAN	81287	1561.21	2.0503e-07	1561.21	0	1.11425e-07
2594_LPKPPGRGV_2_run0	1/sp|Q8N531|FBXL6_HUMAN	509696	1510.79	2.0503e-07	1510.79	0	1.10162e-07
3149_RPRDLPAIQPRL_3_run0	1/sp|O94903|PROSC_HUMAN	73160	2678.39	2.0503e-07	2678.39	0	1.11188e-07
3535_SPNSAHAVSL_2_run0	1/sp|O14511|NRG2_HUMAN	75702	1640.68	2.0503e-07	1640.68	0	1.10795e-07
1206_SLLDEFYKL_2_run0	1/sp|Q14444|CAPR1_HUMAN	37540	5481.1	2.05244e-07	5481.1	0	1.12676e-07
3984_YPLESRPSL_2_run0	1/sp|Q14980|NUMA1_HUMAN	143318	2783.77	2.05244e-07	2783.77	0	1.13098e-07
1872_APRLETKSL_2_run0	1/sp|Q6P6C2|ALKB5_HUMAN	166396	1596.15	2.05787e-07	1596.15	0	1.15088e-07
1987_APSSPRPAL_2_run0	1/sp|P05362|ICAM1_HUMAN	409699	1625.51	2.0621e-07	1625.51	0	1.15557e-07
1533_YLLQEPPRTV_2_run0	1/sp|Q96IZ0|PAWR_HUMAN	282278	3056.61	2.06765e-07	3056.61	0	1.16404e-07
879_LLDVTPLSL_2_run0	3/sp|P11142|HSP7C_HUMAN/sp|P54652|HSP72_HUMAN/sp|P38646|GRP75_HUMAN	129473	5241.55	2.07142e-07	5241.55	0	1.20387e-07
257_FLLDKKIGV_2_run0	1/sp|P78371|TCPB_HUMAN	215086	3375.03	2.08992e-07	3375.03	0	1.21444e-07
3377_SPANTRYLFL_2_run0	1/sp|Q08209|PP2BA_HUMAN	60063	4038.54	2.08992e-07	4038.54	0	1.21428e-07
3852_TPSPARPAL_2_run0	1/sp|Q9H211|CDT1_HUMAN	328102	1811.45	2.10216e-07	1811.45	0	1.21691e-07
757_KLQEFLQTL_2_run0	1/sp|Q9NVI1|FANCI_HUMAN	142175	4206.97	2.11005e-07	4206.97	0	1.21861e-07
1227_SLLQTLYKV_2_run0	1/sp|P46060|RAGP1_HUMAN	210576	4415.37	2.11963e-07	4415.37	0	1.22168e-07
2739_MPRQLSAAAAL_2_run0	1/sp|Q9UQV4|LAMP3_HUMAN	141645	3082.6	2.13065e-07	3082.6	0	1.24318e-07
1656_APAPRPSL_2_run0	1/sp|Q92620|PRP16_HUMAN	357970	1595.21	2.14608e-07	1595.21	0	1.25051e-07
2680_LPSSGRSSL_2_run0	1/sp|O95817|BAG3_HUMAN	1109890	1418.92	2.15507e-07	1418.92	0	1.27362e-07
3939_VPRSQGTEAEL_2_run0	1/sp|Q8NAG6|ANKL1_HUMAN	85195	1518.12	2.15507e-07	1518.12	0	1.25664e-07
1951_APSGGRLLSA_2_run0	1/sp|Q9NRG9|AAAS_HUMAN	301162	1779.74	2.16184e-07	1779.74	0	1.28788e-07
1075_RLIQESPTL_2_run0	1/sp|Q6P1A2|MBOA5_HUMAN	235386	2662.08	2.16315e-07	2662.08	0	1.29139e-07
712_KLLDPEDISV_2_run0	1/sp|Q01082|SPTB2_HUMAN	231581	3776.81	2.16703e-07	3776.81	0	1.29533e-07
1789_APLQHRHVL_2_run0	1/sp|Q504T8|MIDN_HUMAN	151899	902.097	2.16965e-07	902.097	0	1.30869e-07
3083_RPMQQVDTL_2_run0	1/sp|Q6PIJ6|FBX38_HUMAN	107592	2021.75	2.17057e-07	2021.75	0	1.31439e-07
3548_SPQEARNML_2_run0	1/sp|P33240|CSTF2_HUMAN	431888	1794.6	2.17134e-07	1794.6	0	1.31746e-07
1509_YLIDEPSAYL_2_run0	1/sp|P61221|ABCE1_HUMAN	54110	4721.43	2.19067e-07	4721.43	0	1.33039e-07
2777_NPRDLPLMAL_2_run0	1/sp|P04818|TYSY_HUMAN	111523	4419.93	2.21309e-07	4419.93	0	1.33228e-07
2847_RAKSQGMAL_2_run0	1/sp|P53618|COPB_HUMAN	152186	892.779	2.21783e-07	892.779	0	1.36993e-07
2273_IPRLIVSQL_2_run0	1/sp|Q9BXW9|FACD2_HUMAN	197099	4185.78	2.2244e-07	4185.78	0	1.38074e-07
1229_SLLRSIFTV_2_run0	1/sp|Q92830|KAT2A_HUMAN	98168	4858.33	2.22472e-07	4858.33	0	1.40231e-07
2322_KPAASPLTSL_2_run0	1/sp|Q92615|LAR4B_HUMAN	204508	2767.06	2.24338e-07	2767.06	0	1.45003e-07
2260_IPQGGRGAIQF_2_run0	2/sp|Q15437|SC23B_HUMAN/sp|Q15436|SC23A_HUMAN	343268	2824.63	2.24338e-07	2824.63	0	1.41387e-07
976_MLNEHDFEV_2_run0	1/sp|P38398|BRCA1_HUMAN	39976	3354.62	2.26235e-07	3354.62	0	1.45461e-07
1665_APAQRAQSL_2_run0	1/sp|Q63ZY3|KANK2_HUMAN	148615	893.015	2.26235e-07	893.015	0	1.46756e-07
216_FLDPRPLTV_2_run0	1/sp|Q16678|CP1B1_HUMAN	383769	3640.81	2.28175e-07	3640.81	0	1.47931e-07
1207_SLLDIIEKV_2_run0	1/sp|P49815|TSC2_HUMAN	41668	5664.84	2.29186e-07	5664.84	0	1.49207e-07
3840_TPRVPDNSL_2_run0	1/sp|Q13829|BACD2_HUMAN	154533	2020.11	2.29684e-07	2020.11	0	1.49387e-07
3582_SPREMVAQF_2_run0	1/sp|Q86YC3|NRROS_HUMAN	121750	2744.52	2.29853e-07	2744.52	0	1.51391e-07
2207_HPRTSITVV_2_run0	1/sp|Q9NQT4|EXOS5_HUMAN	109983	1554.26	2.30732e-07	1554.26	0	1.51424e-07
453_GLSDLRLEL_2_run0	1/sp|Q96A65|EXOC4_HUMAN	43178	4572.01	2.31889e-07	4572.01	0	1.52541e-07
1337_TVLPFVSTV_2_run0	1/sp|P26010|ITB7_HUMAN	80335	4909.78	2.34613e-07	4909.78	0	1.52759e-07
1962_APSLKQFSL_2_run0	1/sp|Q9UGJ1|GCP4_HUMAN	76030	3705.05	2.35409e-07	3705.05	0	1.5475e-07
171_FIIEKQPPQV_2_run0	2/sp|P51692|STA5B_HUMAN/sp|P42229|STA5A_HUMAN	103260	3047.77	2.36204e-07	3047.77	0	1.54934e-07
2192_HPRAYFMQL_2_run0	1/sp|Q9Y2Y1|RPC10_HUMAN	165397	3207.57	2.36373e-07	3207.57	0	1.55621e-07
1233_SLMDHTIPEV_2_run0	1/sp|O00560|SDCB1_HUMAN	179696	3634.2	2.36416e-07	3634.2	0	1.56573e-07
1927_APRTVALTAL_2_run0	1/sp|P04440|DPB1_HUMAN	2534070	3118.98	2.36416e-07	3118.98	0	1.56203e-07
798_KLYDIDVAKV_2_run0	1/sp|P62750|RL23A_HUMAN	64090	3119.03	2.36416e-07	3119.03	0	1.58083e-07
240_FLIEEQKIVV_2_run0	1/sp|P49207|RL34_HUMAN	24712	4241.05	2.37042e-07	4241.05	0	1.5822e-07
191_FLADAKWIL_2_run0	1/sp|Q9ULU4|PKCB1_HUMAN	27870	5011.94	2.38263e-07	5011.94	0	1.5958e-07
3530_SPNQARAQAAL_2_run0	1/sp|P26599|PTBP1_HUMAN	290058	1331.67	2.38534e-07	1331.67	0	1.61585e-07
3766_TPAPPTHAL_2_run0	1/sp|Q5SXM2|SNPC4_HUMAN	432724	1860.98	2.38772e-07	1860.98	0	1.63905e-07
1565_YLTHDSPSV_2_run0	1/sp|P09234|RU1C_HUMAN	136730	1749.03	2.38772e-07	1749.03	0	1.61685e-07
3681_SPSKPNPVF_2_run0	1/sp|Q16656|NRF1_HUMAN	152891	1992.9	2.428e-07	1992.9	0	1.65071e-07
1048_RLAQHITYV_2_run0	1/sp|P33993|MCM7_HUMAN	985302	1922.99	2.44914e-07	1922.99	0	1.65226e-07
1852_APRHGSLGF_2_run0	1/sp|P39023|RL3_HUMAN	172490	1523.35	2.45299e-07	1523.35	0	1.69238e-07
2675_LPSLRILYM_2_run0	1/sp|P00403|COX2_HUMAN	31594	5105.05	2.45299e-07	5105.05	0	1.71764e-07
2598_LPKSPPYTAF_2_run0	1/sp|P23588|IF4B_HUMAN	226581	3278.45	2.45299e-07	3278.45	0	1.67634e-07
2600_LPKTTALEL_2_run0	1/sp|P18583|SON_HUMAN	278756	3249.7	2.45299e-07	3249.7	0	1.68282e-07
2608_LPMNPRNMM_2_run0	1/sp|Q9NZN8|CNOT2_HUMAN	73032	3057.99	2.46568e-07	3057.99	0	1.71784e-07
2666_LPSATRALEL_2_run0	1/sp|P18583|SON_HUMAN	346077	3440.29	2.47964e-07	3440.29	0	1.74671e-07
746_KLMQQQQEV_2_run0	1/sp|O15164|TIF1A_HUMAN	29382	1376.86	2.49142e-07	1376.86	0	1.74931e-07
2681_LPSSIRTKAL_2_run0	1/sp|Q9BY77|PDIP3_HUMAN	109050	2017.87	2.49203e-07	2017.87	0	1.76129e-07
188_FIYHGEVPQA_2_run0	1/sp|P33076|C2TA_HUMAN	284047	2787.53	2.49203e-07	2787.53	0	1.77476e-07
3787_TPISRLVAL_2_run0	1/sp|Q9H765|ASB8_HUMAN	205113	3906.38	2.52131e-07	3906.38	0	1.7748e-07
105_ALSNLEVKL_2_run0	1/sp|Q86UX7|URP2_HUMAN	175410	3649.35	2.52334e-07	3649.35	0	1.78047e-07
2155_GPRSAQVAQSL_2_run0	1/sp|Q9NU22|MDN1_HUMAN	68884	1672.96	2.54017e-07	1672.96	0	1.79038e-07
2278_IPRQVAQTL_2_run0	1/sp|Q14703|MBTP1_HUMAN	152905	2271.34	2.54017e-07	2271.34	0	1.82316e-07
2783_NPRLIASSL_2_run0	1/sp|Q14C86|GAPD1_HUMAN	138887	2835.24	2.54147e-07	2835.24	0	1.85591e-07
2641_LPRIQSTAL_2_run0	1/sp|Q13085|ACACA_HUMAN	178832	2942.77	2.56172e-07	2942.77	0	1.87935e-07
731_KLLPQLTYL_2_run0	1/sp|P39687|AN32A_HUMAN	176353	4563.02	2.56172e-07	4563.02	0	1.86614e-07
2380_KPKAPPPSL_2_run0	1/sp|Q9NZZ3|CHMP5_HUMAN	515345	1041.79	2.56195e-07	1041.79	0	1.88064e-07
1415_VLSSRLAFA_2_run0	1/sp|P79483|DRB3_HUMAN	780381	3085.44	2.57084e-07	3085.44	0	1.88259e-07
640_KIYEGQVEV_2_run0	1/sp|P46777|RL5_HUMAN	1533400	2307.69	2.57601e-07	2307.69	0	1.90888e-07
3418_SPELRSTAM_2_run0	1/sp|P42345|MTOR_HUMAN	55220	1633.61	2.58722e-07	1633.61	0	1.94001e-07
3985_YPLLKNISM_2_run0	1/sp|Q8NB66|UN13C_HUMAN	204644	3936.75	2.5904e-07	3936.75	0	1.94737e-07
1197_SLIGHLQTL_2_run0	1/sp|Q16690|DUS5_HUMAN	165456	3732.84	2.59203e-07	3732.84	0	1.95411e-07
1395_VLMDRLPSL_2_run0	1/sp|O60287|NPA1P_HUMAN	477715	4194.97	2.60166e-07	4194.97	0	1.96562e-07
3954_VPVAKTAEL_2_run0	1/sp|P49790|NU153_HUMAN	183690	1924.19	2.60764e-07	1924.19	0	1.97052e-07
2418_KPMKSVLVV_2_run0	1/sp|P32248|CCR7_HUMAN	285355	2134.78	2.61298e-07	2134.78	0	1.97991e-07
2771_NPNLRKNVL_2_run0	1/sp|P23193|TCEA1_HUMAN	317304	1584.76	2.61631e-07	1584.76	0	2.00732e-07
2036_AVILRALSL_2_run0	1/sp|P20036|DPA1_HUMAN	200441	4369.73	2.61939e-07	4369.73	0	2.00853e-07
3000_RPIILLDSL_2_run0	1/sp|Q96JH7|VCIP1_HUMAN	14496	4703.91	2.61939e-07	4703.91	0	2.00857e-07
1217_SLLGDDALVQV_2_run0	1/sp|Q15393|SF3B3_HUMAN	52369	4707.39	2.62319e-07	4707.39	0	2.01853e-07
1117_RLSEVQASL_2_run0	1/sp|Q9NXW2|DJB12_HUMAN	271989	2301.49	2.62319e-07	2301.49	0	2.03987e-07
3631_SPRPPAEGF_2_run0	1/sp|Q9BWN1|PRR14_HUMAN	322861	1921.75	2.62461e-07	1921.75	0	2.04978e-07
3603_SPRKDGLVSL_2_run0	1/sp|P51570|GALK1_HUMAN	127972	2062.1	2.63504e-07	2062.1	0	2.06482e-07
1906_APRQPGLM(UniMod:35)AQM_2_run0	1/sp|Q9Y6H1|CHCH2_HUMAN	81368	1979.79	2.64632e-07	1979.79	0	2.11936e-07
381_GLADNTVIAKV_2_run0	1/sp|P26639|SYTC_HUMAN	59249	3116.75	2.65456e-07	3116.75	0	2.14366e-07
3221_RPRVTEPISA_2_run0	1/sp|O14791|APOL1_HUMAN	44471	1508.86	2.65456e-07	1508.86	0	2.13173e-07
2307_KAASVRPVL_2_run0	1/sp|Q9H269|VPS16_HUMAN	171365	1460.73	2.6588e-07	1460.73	0	2.17394e-07
693_KLIGDTPIDTFL_2_run0	1/sp|P19793|RXRA_HUMAN	71998	5019	2.67707e-07	5019	0	2.19224e-07
3140_RPRATVMVM_2_run0	1/sp|O75787|RENR_HUMAN	74147	1819.85	2.7082e-07	1819.85	0	2.1971e-07
1998_APTLRLVNL_2_run0	1/sp|Q13087|PDIA2_HUMAN	138917	4060.16	2.7082e-07	4060.16	0	2.19599e-07
1875_APRLMITHI_2_run0	1/sp|Q9NTJ3|SMC4_HUMAN	97556	3010.44	2.7082e-07	3010.44	0	2.19572e-07
2654_LPRPVPQNL_2_run0	1/sp|Q9NWF9|RN216_HUMAN	535233	2808.24	2.71555e-07	2808.24	0	2.20907e-07
3606_SPRKLPTSL_2_run0	1/sp|Q9UIG0|BAZ1B_HUMAN	206400	1819.28	2.7246e-07	1819.28	0	2.24542e-07
665_KLFGMIITI_2_run0	1/sp|P61619|S61A1_HUMAN	95582	5473.05	2.72821e-07	5473.05	0	2.25441e-07
3928_VPRPIFSQL_2_run0	1/sp|Q9C091|GRB1L_HUMAN	112091	3780.48	2.73398e-07	3780.48	0	2.25989e-07
3501_SPLTKSISL_2_run0	1/sp|Q12802|AKP13_HUMAN	363695	3048.89	2.73453e-07	3048.89	0	2.26584e-07
3649_SPRSSLNNSL_2_run0	1/sp|Q9UPW0|FOXJ3_HUMAN	189153	1600.46	2.751e-07	1600.46	0	2.26775e-07
272_FLLPHPGLQV_2_run0	1/sp|Q6DD88|ATLA3_HUMAN	228110	4416.88	2.75811e-07	4416.88	0	2.29927e-07
247_FLIRESETL_2_run0	1/sp|P07948|LYN_HUMAN	210448	3349.86	2.76499e-07	3349.86	0	2.30463e-07
3509_SPMNHSVQM_2_run0	1/sp|Q92793|CBP_HUMAN	21196	1615.32	2.76902e-07	1615.32	0	2.30492e-07
1628_APAGTTSSRVL_2_run0	1/sp|Q96JP5|ZFP91_HUMAN	37922	1457.19	2.76902e-07	1457.19	0	2.30467e-07
2375_KPINVRVTTM_2_run0	2/sp|P35241|RADI_HUMAN/sp|P15311|EZRI_HUMAN	63335	2053.75	2.77896e-07	2053.75	0	2.31212e-07
199_FLANIGTSV_2_run0	1/sp|Q9UKG1|DP13A_HUMAN	104980	3795.53	2.78193e-07	3795.53	0	2.32986e-07
2640_LPRHHPLVL_2_run0	1/sp|O75164|KDM4A_HUMAN	70466	1777.21	2.78489e-07	1777.21	0	2.33145e-07
796_KLYAGAILEV_2_run0	1/sp|O60613|SEP15_HUMAN	160403	3986.2	2.7879e-07	3986.2	0	2.35237e-07
1423_VLVPYEPPQV_2_run0	1/sp|Q9H3D4|P63_HUMAN	78573	4111.1	2.79423e-07	4111.1	0	2.37572e-07
838_KVIDEIYRV_2_run0	1/sp|Q9NVF7|FBX28_HUMAN	112510	2846.82	2.79973e-07	2846.82	0	2.38896e-07
1746_APIGSRGPQL_2_run0	1/sp|Q9BRQ3|NUD22_HUMAN	132041	2062.82	2.79973e-07	2062.82	0	2.40672e-07
3831_TPRPM(UniMod:35)TAEL_2_run0	1/sp|P78357|CNTP1_HUMAN	108455	1653.03	2.80592e-07	1653.03	0	2.40841e-07
2062_FPIHVQTSL_2_run0	1/sp|Q9NVM4|ANM7_HUMAN	85902	3701.12	2.82958e-07	3701.12	0	2.46656e-07
1440_VMFGGKQVVV_2_run0	1/sp|O43865|SAHH2_HUMAN	139752	3375.07	2.84748e-07	3375.07	0	2.47233e-07
940_LLYDLADQLHA_2_run0	1/sp|P13804|ETFA_HUMAN	74234	4405.9	2.84922e-07	4405.9	0	2.47412e-07
3291_RPYAPINANAI_2_run0	1/sp|O94776|MTA2_HUMAN	447937	2876.11	2.84972e-07	2876.11	0	2.48658e-07
1576_YLYPDITRL_2_run0	1/sp|P31641|SC6A6_HUMAN	110824	4321.71	2.85242e-07	4321.71	0	2.48988e-07
1425_VLWDRTFS_2_run0	1/sp|P42224|STAT1_HUMAN	176968	3447.86	2.86611e-07	3447.86	0	2.50891e-07
1241_SLQDEIQRV_2_run0	1/sp|Q9UNX4|WDR3_HUMAN	445275	2983.68	2.86611e-07	2983.68	0	2.52137e-07
2568_LPASVHPQL_2_run0	1/sp|Q9H0K1|SIK2_HUMAN	364507	2620.23	2.86611e-07	2620.23	0	2.50982e-07
3661_SPRVPNSSV_2_run0	1/sp|Q9NR09|BIRC6_HUMAN	153546	1338.8	2.88371e-07	1338.8	0	2.52464e-07
708_KLLDIRSYL_2_run0	1/sp|P51665|PSMD7_HUMAN	89074	4361.28	2.88878e-07	4361.28	0	2.52735e-07
2889_RPANPPGVL_2_run0	1/sp|P35580|MYH10_HUMAN	361554	1870.55	2.88878e-07	1870.55	0	2.5355e-07
2836_QPSPARAPAEL_2_run0	1/sp|Q13794|APR_HUMAN	149277	1984.8	2.9009e-07	1984.8	0	2.54977e-07
97_ALQEMVHQV_2_run0	1/sp|Q14511|CASL_HUMAN	211157	2550.22	2.90586e-07	2550.22	0	2.57016e-07
2770_NPMTNRSTV_2_run0	1/sp|O00338|ST1C2_HUMAN	153244	1192.77	2.90586e-07	1192.77	0	2.57344e-07
1163_SIYGGFLLGV_2_run0	1/sp|P35606|COPB2_HUMAN	35396	5762.96	2.90586e-07	5762.96	0	2.58983e-07
567_ILLRDLPTL_2_run0	1/sp|Q3ZCQ3|F174B_HUMAN	98887	4636.2	2.92141e-07	4636.2	0	2.59243e-07
3546_SPQDKRTLL_2_run0	1/sp|Q8TC07|TBC15_HUMAN	131415	1394.88	2.93435e-07	1394.88	0	2.5932e-07
475_GLWGQSVPTA_2_run0	1/sp|Q9UBN6|TR10D_HUMAN	109521	3650.01	2.93734e-07	3650.01	0	2.59597e-07
3946_VPSEGKKSL_2_run0	1/sp|Q9BXS6|NUSAP_HUMAN	38349	686.222	2.93776e-07	686.222	0	2.62672e-07
1848_APRGTGIVSA_2_run0	1/sp|P15880|RS2_HUMAN	722409	1382.82	2.94278e-07	1382.82	0	2.63176e-07
3169_RPRGLALVL_2_run0	1/sp|P42575|CASP2_HUMAN	179960	3222.1	2.94278e-07	3222.1	0	2.64217e-07
2146_GPREAVSGL_2_run0	1/sp|Q9GZU3|TM39B_HUMAN	701747	1793.12	2.94505e-07	1793.12	0	2.64987e-07
3508_SPMMPRITSVF_2_run0	1/sp|Q6AHZ1|Z518A_HUMAN	77672	4589.56	2.94511e-07	4589.56	0	2.66748e-07
287_FLNDEVWNL_2_run0	1/sp|O95825|QORL1_HUMAN	53931	5213.91	2.94907e-07	5213.91	0	2.67783e-07
2817_QPITPGPSI_2_run0	1/sp|O60341|KDM1A_HUMAN	485574	2800.58	2.96163e-07	2800.58	0	2.68381e-07
2127_GPLPPHLAL_2_run0	1/sp|Q08211|DHX9_HUMAN	167792	3736.69	2.97577e-07	3736.69	0	2.68397e-07
3265_RPTGSVSSTL_2_run0	1/sp|Q86UK7|ZN598_HUMAN	160486	1447.98	2.99045e-07	1447.98	0	2.69252e-07
2230_IPDASKLQFIL_2_run0	1/sp|O75935|DCTN3_HUMAN	127709	5001.5	3.01151e-07	5001.5	0	2.70351e-07
1465_YAYDGKDYLAL_2_run0	1/sp|P17693|HLAG_HUMAN	49259	3716.03	3.0236e-07	3716.03	0	2.77817e-07
1692_APDGTRNLTA_2_run0	1/sp|Q9C0E2|XPO4_HUMAN	59925	1211.3	3.02479e-07	1211.3	0	2.78115e-07
1001_NLYPFVKTV_2_run0	1/sp|P31939|PUR9_HUMAN	456230	3783.37	3.02952e-07	3783.37	0	2.79366e-07
820_KMHARDFTV_2_run0	2/sp|Q14240|IF4A2_HUMAN/sp|P60842|IF4A1_HUMAN	35389	1408.18	3.0336e-07	1408.18	0	2.80111e-07
3970_YLRPPNTSL_2_run0	1/sp|O75494|SRS10_HUMAN	236675	2636.83	3.04944e-07	2636.83	0	2.80336e-07
3244_RPSQAAPAV_2_run0	1/sp|P40222|TXLNA_HUMAN	430796	1037.38	3.0523e-07	1037.38	0	2.81613e-07
3524_SPNLRLLDL_2_run0	1/sp|Q8N531|FBXL6_HUMAN	531135	4509.9	3.05471e-07	4509.9	0	2.82807e-07
1215_SLLENLEKI_2_run0	1/sp|O60812|HNRCL_HUMAN	414564	4644.08	3.05758e-07	4644.08	0	2.93889e-07
3389_SPASPKISL_2_run0	1/sp|Q8WWM7|ATX2L_HUMAN	208548	2558.26	3.05758e-07	2558.26	0	2.88916e-07
1473_YIYDKDMEII_2_run0	1/sp|Q9UPT9|UBP22_HUMAN	78556	3999.55	3.06215e-07	3999.55	0	2.94764e-07
2596_LPKQPPLAL_2_run0	1/sp|Q96S59|RANB9_HUMAN	362753	3346.16	3.07027e-07	3346.16	0	2.94969e-07
1218_SLLGGDVVSV_2_run0	1/sp|Q99576|T22D3_HUMAN	123770	4177.19	3.07338e-07	4177.19	0	2.95291e-07
3043_RPKPIITSV_2_run0	1/sp|P0CG13|CTF8_HUMAN	60260	1785.63	3.07503e-07	1785.63	0	2.99185e-07
2098_GPAIERMGL_2_run0	1/sp|P52272|HNRPM_HUMAN	214984	2889.3	3.08747e-07	2889.3	0	2.99766e-07
596_ILTDITKGV_2_run0	1/sp|P13639|EF2_HUMAN	495954	3020.54	3.09434e-07	3020.54	0	3.00618e-07
458_GLTEALHFV_2_run0	1/sp|P07199|CENPB_HUMAN	75789	4301.29	3.111e-07	4301.29	0	3.00826e-07
3974_YPARYRPTAL_2_run0	1/sp|Q96L33|RHOV_HUMAN	50869	2055.07	3.111e-07	2055.07	0	3.02306e-07
892_LLIKQVVEV_2_run0	1/sp|Q8NDN9|RCBT1_HUMAN	51829	3719.07	3.11532e-07	3719.07	0	3.0603e-07
3462_SPIHWSDRDSL_3_run0	1/sp|Q86SU0|ILDR1_HUMAN	77963	2773.65	3.12847e-07	2773.65	0	3.08495e-07
51_ALIEKLVEL_2_run0	1/sp|Q14181|DPOA2_HUMAN	246667	4595.86	3.12847e-07	4595.86	0	3.0728e-07
2217_IARLPSSTL_2_run0	1/sp|Q86Y91|KI18B_HUMAN	703976	2608.32	3.13267e-07	2608.32	0	3.12797e-07
1839_APRELGLGL_2_run0	1/sp|Q9BTD8|RBM42_HUMAN	493071	3237.86	3.14654e-07	3237.86	0	3.13771e-07
43_ALFQRPPLI_2_run0	1/sp|O60832|DKC1_HUMAN	84148	4207.02	3.14737e-07	4207.02	0	3.16289e-07
1329_TPVITGAPYEYR_2_run0	1/iRT|iRT_Biognosys|iRT_Biognosys	1573320	2966.81	3.14737e-07	2966.81	0	3.18215e-07
3843_TPSDGRPEL_2_run0	1/sp|Q15642|CIP4_HUMAN	228426	1555.01	3.14752e-07	1555.01	0	3.22129e-07
1102_RLPEAIEEV_2_run0	1/sp|Q9UBQ7|GRHPR_HUMAN	1002730	3065.64	3.15246e-07	3065.64	0	3.23978e-07
3623_SPRNEVEAL_2_run0	1/sp|Q5R372|RBG1L_HUMAN	648368	1902.7	3.16051e-07	1902.7	0	3.25012e-07
2037_AVREAIHAL_2_run0	1/sp|Q9Y4R8|TELO2_HUMAN	167089	1806.37	3.17481e-07	1806.37	0	3.25215e-07
11_AIVDKVPSV_2_run0	1/sp|Q9Y678|COPG1_HUMAN	3188170	2744.68	3.18936e-07	2744.68	0	3.25425e-07
657_KLFDAPLSI_2_run0	1/sp|A8K0Z3|WASH1_HUMAN	156333	4469.75	3.19943e-07	4469.75	0	3.27276e-07
266_FLLGPRLVLA_2_run0	1/sp|P49755|TMEDA_HUMAN	81664	5076.75	3.21304e-07	5076.75	0	3.28754e-07
35_ALFEGKVQL_2_run0	1/sp|Q8NEZ3|WDR19_HUMAN	108380	3734.88	3.22517e-07	3734.88	0	3.33845e-07
3838_TPRSYVGVTL_2_run0	1/sp|Q92535|PIGC_HUMAN	314594	3103.79	3.24159e-07	3103.79	0	3.3413e-07
3742_SPYLPRGDPVL_2_run0	1/sp|P49754|VPS41_HUMAN	49760	3407.05	3.24589e-07	3407.05	0	3.35752e-07
877_LLDSAPLNV_2_run0	1/sp|Q8NI36|WDR36_HUMAN	135865	3791.61	3.25991e-07	3791.61	0	3.39827e-07
837_KVFDPVPVGV_2_run0	1/sp|Q08211|DHX9_HUMAN	188508	3658.46	3.26043e-07	3658.46	0	3.40672e-07
2096_GPAGPILSL_2_run0	1/sp|Q9BYG3|MK67I_HUMAN	103126	4271.24	3.26122e-07	4271.24	0	3.41109e-07
2499_KPSGVSAAL_2_run0	1/sp|Q9Y3A4|RRP7A_HUMAN	355586	1575.64	3.2786e-07	1575.64	0	3.45509e-07
2218_IARNLTQQL_2_run0	1/sp|Q99541|PLIN2_HUMAN	116944	2288.45	3.28458e-07	2288.45	0	3.463e-07
3120_RPQGGQDIL_2_run0	1/sp|Q9Y265|RUVB1_HUMAN	1791220	1669.12	3.29363e-07	1669.12	0	3.46608e-07
3519_SPNAIFKAL_2_run0	1/sp|P48436|SOX9_HUMAN	62517	3704.47	3.29439e-07	3704.47	0	3.50521e-07
3028_RPKETDHKSL_3_run0	1/sp|Q9BVI0|PHF20_HUMAN	80286	324.525	3.29439e-07	324.525	0	3.47559e-07
760_KLQELNYNL_2_run0	1/sp|P42224|STAT1_HUMAN	203064	3210.16	3.29987e-07	3210.16	0	3.53786e-07
281_FLLPVINEM_2_run0	1/sp|Q9Y605|MOFA1_HUMAN	80143	5913.44	3.30111e-07	5913.44	0	3.59465e-07
3935_VPRPVLRAL_2_run0	1/sp|Q9GZR7|DDX24_HUMAN	380082	2618.87	3.30202e-07	2618.87	0	3.60128e-07
2934_RPDLRMAAI_2_run0	1/sp|P46779|RL28_HUMAN	175449	2651.55	3.32395e-07	2651.55	0	3.64324e-07
1972_APSPRPLSL_2_run0	1/sp|Q6NUT3|MFS12_HUMAN	749833	2604.18	3.33929e-07	2604.18	0	3.6707e-07
1732_APGVRAVEL_2_run0	1/sp|Q9Y508|RN114_HUMAN	587171	2514.06	3.35058e-07	2514.06	0	3.69617e-07
1121_RLVEIQYEL_2_run0	1/sp|Q14161|GIT2_HUMAN	94361	3921.2	3.3513e-07	3921.2	0	3.7033e-07
1010_QLAQFVHEV_2_run0	1/sp|A8MPP1|D11L8_HUMAN	243676	3230.06	3.36198e-07	3230.06	0	3.74637e-07
3500_SPLSAARAAL_2_run0	1/sp|Q8N5I4|DHRSX_HUMAN	304899	3009.53	3.36623e-07	3009.53	0	3.81879e-07
408_GLIDEIYGI_2_run0	1/sp|Q96AX1|VP33A_HUMAN	89327	5357.26	3.37223e-07	5357.26	0	3.8318e-07
3316_RVKEIGSTM(UniMod:35)_2_run0	1/sp|O00422|SAP18_HUMAN	56106	514.913	3.37245e-07	514.913	0	3.85593e-07
1472_YILAGVENSK_2_run0	1/iRT|iRT_Biognosys|iRT_Biognosys	1367060	2396.66	3.37526e-07	2396.66	0	3.88855e-07
2407_KPKTTNIEL_2_run0	1/sp|Q15291|RBBP5_HUMAN	173484	1553.27	3.37906e-07	1553.27	0	3.90551e-07
233_FLFQEPRSI_2_run0	1/sp|Q9UK61|F208A_HUMAN	79497	3973.25	3.37906e-07	3973.25	0	3.90951e-07
3718_SPTLQRNAL_2_run0	1/sp|P54578|UBP14_HUMAN	122269	1869.06	3.37906e-07	1869.06	0	3.98363e-07
1133_RLYPWGVVEV_2_run0	1/sp|Q15019|SEPT2_HUMAN	298233	4624.49	3.39015e-07	4624.49	0	3.99407e-07
204_FLDEPTNHL_2_run0	1/sp|Q9UG63|ABCF2_HUMAN	133891	2860.65	3.4091e-07	2860.65	0	4.00238e-07
3609_SPRKTAQDTL_2_run0	1/sp|O95267|GRP1_HUMAN	76646	738.485	3.42883e-07	738.485	0	4.00455e-07
195_FLAEDALNTV_2_run0	1/sp|Q08345|DDR1_HUMAN	40567	4154.31	3.435e-07	4154.31	0	4.06224e-07
1809_APNYRLKSL_2_run0	1/sp|Q9HBM6|TAF9B_HUMAN	180703	2042.12	3.435e-07	2042.12	0	4.02689e-07
3160_RPREQNGAIYL_2_run0	1/sp|Q95460|HMR1_HUMAN	49155	2059.4	3.435e-07	2059.4	0	4.0609e-07
1856_APRIALHTAL_2_run0	1/sp|Q9UBD5|ORC3_HUMAN	169037	2667.31	3.44708e-07	2667.31	0	4.08803e-07
2655_LPRQPPMSL_2_run0	1/sp|Q13045|FLII_HUMAN	468226	3005.62	3.45246e-07	3005.62	0	4.10397e-07
2614_LPNVPSIAL_2_run0	2/sp|P59074|CHM4P_HUMAN/sp|Q9H444|CHM4B_HUMAN	43263	4728.98	3.46505e-07	4728.98	0	4.18338e-07
3127_RPQLQRQVL_2_run0	1/sp|Q96HA7|TONSL_HUMAN	43989	1737.28	3.46871e-07	1737.28	0	4.1984e-07
88_ALNSKILSV_2_run0	1/sp|Q96NW4|ANR27_HUMAN	51019	3075.48	3.47832e-07	3075.48	0	4.20173e-07
3931_VPRPPSLLATL_2_run0	1/sp|Q14689|DIP2A_HUMAN	174208	4460.24	3.49982e-07	4460.24	0	4.21608e-07
850_KVWGNVVTV_2_run0	1/sp|O43390|HNRPR_HUMAN	191442	3170.68	3.50757e-07	3170.68	0	4.2578e-07
3845_TPSEPHPVL_2_run0	1/sp|Q9Y5A9|YTHD2_HUMAN	525218	2143.56	3.52325e-07	2143.56	0	4.28267e-07
632_KILQELPSV_2_run0	1/sp|Q96ST2|IWS1_HUMAN	299860	3481.12	3.53493e-07	3481.12	0	4.2987e-07
1566_YLTNEGIQYL_2_run0	1/sp|P46783|RS10_HUMAN	104765	4209.02	3.54241e-07	4209.02	0	4.31663e-07
3301_RPYQPLGAL_2_run0	1/sp|Q9Y5Y2|NUBP2_HUMAN	198139	3029.86	3.56259e-07	3029.86	0	4.35843e-07
1801_APNERPYSL_2_run0	1/sp|Q01151|CD83_HUMAN	177611	2037.63	3.57377e-07	2037.63	0	4.38561e-07
844_KVLERVNAV_2_run0	1/sp|Q9UL46|PSME2_HUMAN	348442	1434.61	3.57467e-07	1434.61	0	4.40288e-07
331_FLYAGHIFL_2_run0	1/sp|Q66K64|DCA15_HUMAN	189824	4912.31	3.5748e-07	4912.31	0	4.41727e-07
3299_RPYPSPGAVL_2_run0	1/sp|O60828|PQBP1_HUMAN	503130	2858.93	3.58242e-07	2858.93	0	4.42831e-07
775_KLVELPYTV_2_run0	1/sp|Q9NPF4|OSGEP_HUMAN	192426	3894.41	3.58517e-07	3894.41	0	4.43655e-07
496_GQIEVVPEV_2_run0	1/sp|Q92576|PHF3_HUMAN	197664	3612.33	3.602e-07	3612.33	0	4.43702e-07
1282_TLFPVRLLV_2_run0	1/sp|Q8NF37|PCAT1_HUMAN	83222	5475.1	3.61244e-07	5475.1	0	4.44246e-07
3833_TPRPTAAEL_2_run0	1/sp|Q9BSJ8|ESYT1_HUMAN	605121	1818.49	3.632e-07	1818.49	0	4.46229e-07
2196_HPRGGVIQSV_2_run0	1/sp|Q96B23|CR025_HUMAN	78923	1276.07	3.64307e-07	1276.07	0	4.46794e-07
386_GLAPAEVVVATV_2_run0	1/sp|Q969V6|MKL1_HUMAN	52388	4471.47	3.6432e-07	4471.47	0	4.485e-07
2706_MPAFSKIGGIL_2_run0	1/sp|P46940|IQGA1_HUMAN	27732	4651.27	3.65547e-07	4651.27	0	4.50569e-07
506_HLANIVERV_2_run0	1/sp|Q8IYM9|TRI22_HUMAN	224855	2273.06	3.65561e-07	2273.06	0	4.52256e-07
3435_SPGGPRAAV_2_run0	1/sp|P53814|SMTN_HUMAN	146754	906.705	3.66467e-07	906.705	0	4.52844e-07
1586_YQKFLPLTQV_2_run0	1/sp|Q9BTE1|DCTN5_HUMAN	42888	4097.13	3.66959e-07	4097.13	0	4.54885e-07
1040_RIIDVVYNA_2_run0	1/sp|P62241|RS8_HUMAN	448955	3129.3	3.6819e-07	3129.3	0	4.59141e-07
95_ALQEKLWNV_2_run0	1/sp|Q96HW7|INT4_HUMAN	82555	3582.41	3.69085e-07	3582.41	0	4.62185e-07
3011_RPISDFLTL_2_run0	1/sp|Q9UK73|FEM1B_HUMAN	333411	4616.61	3.69085e-07	4616.61	0	4.65018e-07
1971_APSPPLSGL_2_run0	1/sp|Q96GQ5|CP058_HUMAN	103270	3387.4	3.69825e-07	3387.4	0	4.67304e-07
346_FMLPDPQNISL_2_run0	1/sp|Q8WW01|SEN15_HUMAN	50684	5506.95	3.70669e-07	5506.95	0	4.67907e-07
3415_SPEETRAAL_2_run0	1/sp|P78549|NTH_HUMAN	341089	1392.64	3.70966e-07	1392.64	0	4.67932e-07
1603_AARAIISEL_2_run0	1/sp|P78344|IF4G2_HUMAN	269781	3126.77	3.71471e-07	3126.77	0	4.71867e-07
3616_SPRLSQTFLQL_2_run0	1/sp|Q92608|DOCK2_HUMAN	86749	4397.59	3.7245e-07	4397.59	0	4.7321e-07
880_LLFDRPMHV_2_run0	1/sp|P52272|HNRPM_HUMAN	189349	3390	3.73085e-07	3390	0	4.73605e-07
414_GLIDRQVTV_2_run0	1/sp|Q9UPN3|MACF1_HUMAN	179279	2819.73	3.74423e-07	2819.73	0	4.74035e-07
2303_IVQATRTSL_2_run0	1/sp|Q6VMQ6|MCAF1_HUMAN	130453	1712.46	3.75486e-07	1712.46	0	4.77092e-07
2069_FPNIPGKSL_2_run0	1/sp|O15121|DEGS1_HUMAN	1083330	3248	3.77034e-07	3248	0	4.79272e-07
2067_FPMELRQFL_2_run0	1/sp|P40763|STAT3_HUMAN	58916	5213.54	3.77435e-07	5213.54	0	4.81771e-07
3839_TPRTNNIEL_2_run0	1/sp|Q9NVM9|ASUN_HUMAN	634477	2134.4	3.7846e-07	2134.4	0	4.83484e-07
2974_RPHAFQVIL_2_run0	1/sp|Q8IWE5|PKHM2_HUMAN	162725	3197.97	3.79151e-07	3197.97	0	4.8567e-07
2142_GPRAGGSVVL_2_run0	1/sp|Q9Y2E6|DTX4_HUMAN	502384	1863.81	3.80544e-07	1863.81	0	4.85904e-07
2451_KPRDVSSVEL_2_run0	1/sp|Q01082|SPTB2_HUMAN	767177	1780.34	3.82139e-07	1780.34	0	4.90167e-07
3886_VPDSSGPERIL_2_run0	1/sp|P61978|HNRPK_HUMAN	836726	2606.56	3.82931e-07	2606.56	0	4.91376e-07
1371_VLIEGSINSV_2_run0	1/sp|P59998|ARPC4_HUMAN	95443	3542.67	3.84442e-07	3542.67	0	4.96753e-07
1256_SLYGGTITI_2_run0	1/sp|Q5VTR2|BRE1A_HUMAN	127147	4141.68	3.84442e-07	4141.68	0	4.93628e-07
484_GLYGAIFRL_2_run0	1/sp|O95977|S1PR4_HUMAN	89789	4965.4	3.84442e-07	4965.4	0	4.91938e-07
1126_RLWGEPVNL_2_run0	1/sp|O00507|USP9Y_HUMAN	698585	3897.36	3.85065e-07	3897.36	0	4.98624e-07
1651_APAPPKAEA_2_run0	1/sp|P62750|RL23A_HUMAN	1028280	978.759	3.85955e-07	978.759	0	4.99749e-07
3996_YPRQQLLTL_2_run0	1/sp|Q15645|PCH2_HUMAN	90244	3550.6	3.86629e-07	3550.6	0	5.06134e-07
323_FLVQNIHTL_2_run0	1/sp|Q8TDN6|BRX1_HUMAN	200698	3755.87	3.88738e-07	3755.87	0	5.07855e-07
434_GLLGTLVQL_2_run0	1/sp|P35222|CTNB1_HUMAN	153783	5772.93	3.889e-07	5772.93	0	5.08237e-07
215_FLDPNNIPKA_2_run0	1/sp|Q9BVK2|ALG8_HUMAN	386194	3074.41	3.89443e-07	3074.41	0	5.10737e-07
2698_LVRDVVSSL_2_run0	1/sp|Q9NQ55|SSF1_HUMAN	985785	3022.83	3.90802e-07	3022.83	0	5.11706e-07
3397_SPAYRDLAA_2_run0	1/sp|O15492|RGS16_HUMAN	154925	1862.66	3.9166e-07	1862.66	0	5.21231e-07
1370_VLIDYQRNV_2_run0	1/sp|O14980|XPO1_HUMAN	848067	2758.74	3.9174e-07	2758.74	0	5.24531e-07
741_KLMDLDVEQL_2_run0	1/sp|P12004|PCNA_HUMAN	123206	4237.89	3.91826e-07	4237.89	0	5.24936e-07
2650_LPRPHASIMF_2_run0	1/sp|Q08211|DHX9_HUMAN	140525	3161.87	3.92553e-07	3161.87	0	5.27151e-07
2452_KPRDVSSVELL_2_run0	1/sp|Q01082|SPTB2_HUMAN	159649	2660.38	3.93553e-07	2660.38	0	5.27203e-07
100_ALSDHHIYL_2_run0	1/sp|P04075|ALDOA_HUMAN	217013	2611.11	3.94537e-07	2611.11	0	5.27545e-07
2691_LPVLREGVL_2_run0	1/sp|Q92616|GCN1L_HUMAN	120441	3731.5	3.95621e-07	3731.5	0	5.30263e-07
3648_SPRSPSTTYL_2_run0	1/sp|Q13111|CAF1A_HUMAN	194722	2021.52	3.96662e-07	2021.52	0	5.33997e-07
1798_APNAGSRMTQTV_2_run0	1/sp|P51659|DHB4_HUMAN	31205	1509.1	3.97934e-07	1509.1	0	5.38347e-07
2189_HPNSNLLDL_2_run0	1/sp|P63010|AP2B1_HUMAN	170495	3345.71	4.0029e-07	3345.71	0	5.38573e-07
2463_KPRLDTEQL_2_run0	1/sp|Q86UE8|TLK2_HUMAN	141317	1662.72	4.00658e-07	1662.72	0	5.4145e-07
1607_AARPATSTL_2_run0	1/sp|Q04637|IF4G1_HUMAN	5332350	1086.39	4.00894e-07	1086.39	0	5.44078e-07
3297_RPYLSAVRATL_3_run0	1/sp|P59998|ARPC4_HUMAN	80152	2950.45	4.02077e-07	2950.45	0	5.4413e-07
856_LGGNEQVTR_2_run0	1/iRT|iRT_Biognosys|iRT_Biognosys	1244740	856.431	4.041e-07	856.431	0	5.47955e-07
2663_LPRVTELAL_2_run0	1/sp|P78527|PRKDC_HUMAN	281909	4043.59	4.06286e-07	4043.59	0	5.49476e-07
3200_RPRPGTGLGRVM_3_run0	1/sp|Q9BVK6|TMED9_HUMAN	463083	1502.11	4.07756e-07	1502.11	0	5.49807e-07
3451_SPGWVRLAL_2_run0	1/sp|Q9BQB6|VKOR1_HUMAN	251002	4456.05	4.08296e-07	4456.05	0	5.5024e-07
1130_RLYDPASGTISL_2_run0	1/sp|Q9NRK6|ABCBA_HUMAN	53497	3816.27	4.10615e-07	3816.27	0	5.50359e-07
2145_GPREAFRQL_2_run0	1/sp|P57086|SCND1_HUMAN	377879	1945.98	4.12175e-07	1945.98	0	5.518e-07
1476_YLADTVQKL_2_run0	1/sp|Q9NX45|SOLH2_HUMAN	588056	2821.38	4.12525e-07	2821.38	0	5.54396e-07
2427_KPNDSRALQL_2_run0	1/sp|Q9NWX6|THG1_HUMAN	113283	1705.81	4.14732e-07	1705.81	0	5.56726e-07
262_FLLEKPFSV_2_run0	1/sp|O60678|ANM3_HUMAN	189187	4507.38	4.15691e-07	4507.38	0	5.58679e-07
2763_NPHGARLSL_2_run0	1/sp|O95801|TTC4_HUMAN	460747	1589.41	4.17753e-07	1589.41	0	5.60206e-07
2153_GPRPITQSEL_2_run0	1/sp|Q96S82|UBL7_HUMAN	73091	2058.88	4.18511e-07	2058.88	0	5.61685e-07
3613_SPRLPVGGF_2_run0	1/sp|Q14669|TRIPC_HUMAN	782769	3358.51	4.18511e-07	3358.51	0	5.68522e-07
2937_RPDSPAHVL_2_run0	1/sp|Q05923|DUS2_HUMAN	166397	1459.79	4.18511e-07	1459.79	0	5.63664e-07
3571_SPRASGSGL_2_run0	1/sp|Q8WUU4|ZN296_HUMAN	272484	697.859	4.18767e-07	697.859	0	5.6898e-07
685_KLIDGQVIQL_2_run0	1/sp|P52747|ZN143_HUMAN	345653	3849.06	4.19646e-07	3849.06	0	5.72107e-07
3491_SPLKKEQPL_2_run0	1/sp|Q53H80|AKIR2_HUMAN	112672	1221.28	4.20772e-07	1221.28	0	5.72862e-07
487_GLYSGVTTV_2_run0	1/sp|P23921|RIR1_HUMAN	92590	3078.35	4.22048e-07	3078.35	0	5.74224e-07
3948_VPSEQRQML_2_run0	1/sp|Q15572|TAF1C_HUMAN	52368	1772.61	4.23595e-07	1772.61	0	5.75281e-07
2842_QVRLPLGTL_2_run0	1/sp|O43148|MCES_HUMAN	152182	4059.44	4.23595e-07	4059.44	0	5.75032e-07
903_LLLPDYYL_2_run0	1/sp|Q7KZF4|SND1_HUMAN	128395	5526.65	4.24142e-07	5526.65	0	5.76234e-07
3450_SPGVGKTSL_2_run0	1/sp|Q9NU22|MDN1_HUMAN	97632	1460.39	4.25033e-07	1460.39	0	5.78646e-07
3305_RPYSQVNVL_2_run0	1/sp|P46939|UTRO_HUMAN	213046	2578.83	4.26583e-07	2578.83	0	5.79352e-07
444_GLMEDLLKL_2_run0	1/sp|Q8WYP5|ELYS_HUMAN	20008	5775.45	4.27365e-07	5775.45	0	5.80384e-07
2883_RPALPLILGL_2_run0	1/sp|Q9P2E5|CHPF2_HUMAN	30610	5543.96	4.27499e-07	5543.96	0	5.81696e-07
821_KMIEDLQNEL_2_run0	1/sp|Q8IY18|SMC5_HUMAN	31823	3419.94	4.27537e-07	3419.94	0	5.83695e-07
1183_SLDQPTQTV_2_run0	1/sp|Q99613|EIF3C_HUMAN	128648	1960.03	4.29076e-07	1960.03	0	5.85034e-07
3728_SPVFRLETL_2_run0	1/sp|Q9Y5S1|TRPV2_HUMAN	318381	4103.41	4.29801e-07	4103.41	0	5.8596e-07
3666_SPRYIFTM(UniMod:35)L_2_run0	1/sp|Q02880|TOP2B_HUMAN	146111	4021.19	4.31338e-07	4021.19	0	5.89745e-07
2261_IPQKQREITL_2_run0	1/sp|Q9NR30|DDX21_HUMAN	183522	1914.32	4.32833e-07	1914.32	0	5.90112e-07
1889_APRPDRLVNRL_3_run0	1/sp|O75534|CSDE1_HUMAN	291841	2072.56	4.36143e-07	2072.56	0	5.93647e-07
1832_APREALAQTVL_2_run0	1/sp|Q99829|CPNE1_HUMAN	266981	2931.95	4.37281e-07	2931.95	0	5.94581e-07
3092_RPNGTKVAVLL_2_run0	1/sp|Q8NHH9|ATLA2_HUMAN	72326	2467.93	4.37284e-07	2467.93	0	5.96925e-07
2618_LPQANRDTL_2_run0	1/sp|Q9H0H5|RGAP1_HUMAN	634675	1867.02	4.37676e-07	1867.02	0	6.07817e-07
2658_LPRSIGNLTQL_2_run0	1/sp|Q6UWE0|LRSM1_HUMAN	198979	3887.27	4.37676e-07	3887.27	0	6.03812e-07
111_ALTELLAKI_2_run0	1/sp|P30279|CCND2_HUMAN	143827	4790.27	4.38646e-07	4790.27	0	6.08371e-07
2351_KPFDQTTISL_2_run0	1/sp|Q15417|CNN3_HUMAN	73430	3479.55	4.40274e-07	3479.55	0	6.1082e-07
3629_SPRPNIILGL_2_run0	1/sp|Q9BTC0|DIDO1_HUMAN	196233	4176.99	4.41813e-07	4176.99	0	6.13554e-07
1905_APRQPGLMA_2_run0	1/sp|Q9Y6H1|CHCH2_HUMAN	1880120	1646.96	4.43432e-07	1646.96	0	6.14921e-07
747_KLMTALVNV_2_run0	1/sp|Q8WVM7|STAG1_HUMAN	62580	3538.5	4.45102e-07	3538.5	0	6.229e-07
2870_RPAEVGGM(UniMod:35)QL_2_run0	1/sp|P33316|DUT_HUMAN	166101	1654.6	4.46511e-07	1654.6	0	6.25738e-07
1884_APRPAGSYL_2_run0	1/sp|P33076|C2TA_HUMAN	719451	1937.09	4.47908e-07	1937.09	0	6.33048e-07
3945_VPRVPTHTL_2_run0	1/sp|Q8IWZ3|ANKH1_HUMAN	144900	1947.72	4.49276e-07	1947.72	0	6.33324e-07
843_KVLEPSETLVV_2_run0	1/sp|P18583|SON_HUMAN	107931	3349.28	4.54352e-07	3349.28	0	6.35123e-07
3098_RPNNAYTAM_2_run0	1/sp|Q9Y5A9|YTHD2_HUMAN	162937	1402.18	4.56199e-07	1402.18	0	6.38086e-07
2729_MPRGMQGTSL_2_run0	1/sp|Q6UX01|LMBRL_HUMAN	50475	2202.74	4.56199e-07	2202.74	0	6.37273e-07
2099_GPALGRSFL_2_run0	1/sp|P32970|CD70_HUMAN	878341	3269.52	4.57504e-07	3269.52	0	6.39154e-07
86_ALNELLQHV_2_run0	1/sp|Q9Y490|TLN1_HUMAN	142541	3921.37	4.58467e-07	3921.37	0	6.40451e-07
3556_SPQLGRAVQL_2_run0	1/sp|Q8N2A8|PLD6_HUMAN	130961	2856.14	4.59546e-07	2856.14	0	6.41561e-07
2946_RPEEGRPVV_2_run0	1/sp|P27816|MAP4_HUMAN	91797	973.168	4.60037e-07	973.168	0	6.50579e-07
630_KILEDVVGV_2_run0	1/sp|Q9ULW0|TPX2_HUMAN	307237	3329.07	4.60405e-07	3329.07	0	6.50889e-07
1055_RLFDQAFGL_2_run0	1/sp|P04792|HSPB1_HUMAN	139273	4517.88	4.62091e-07	4517.88	0	6.58798e-07
1208_SLLDPVPEV_2_run0	1/sp|Q92616|GCN1L_HUMAN	181989	4442.44	4.62656e-07	4442.44	0	6.62274e-07
1653_APAPPSKVI_2_run0	1/sp|Q7Z5K2|WAPL_HUMAN	129166	1911.2	4.63968e-07	1911.2	0	6.62643e-07
1094_RLLQTLPQL_2_run0	1/sp|Q5T4S7|UBR4_HUMAN	139869	4071.29	4.64916e-07	4071.29	0	6.63235e-07
1878_APRLQSEVA_2_run0	1/sp|P53990|IST1_HUMAN	312899	1531.68	4.66921e-07	1531.68	0	6.74702e-07
2445_KPQTKLLIL_2_run0	1/sp|Q99081|HTF4_HUMAN	286646	3057.59	4.66921e-07	3057.59	0	6.75039e-07
2521_KPVAPSNVL_2_run0	1/sp|Q9NVU0|RPC5_HUMAN	138560	2095.16	4.67805e-07	2095.16	0	6.83202e-07
2327_KPAGPPGILAL_2_run0	1/sp|P35579|MYH9_HUMAN	1381150	3858.15	4.68162e-07	3858.15	0	6.8899e-07
2895_RPAPLPAAVV_2_run0	1/sp|Q6ZRI6|CO039_HUMAN	108683	2821.88	4.68162e-07	2821.88	0	6.86327e-07
752_KLNVAPLAV_2_run0	1/sp|Q6P582|MZT2A_HUMAN	134677	3255.74	4.69294e-07	3255.74	0	6.89814e-07
3820_TPRGGVGIATVM_2_run0	1/sp|Q9P2G9|KLHL8_HUMAN	104605	2937.66	4.70477e-07	2937.66	0	6.92454e-07
874_LLDPNVKSIFV_2_run0	1/sp|O43414|ERI3_HUMAN	48450	4558.97	4.70477e-07	4558.97	0	6.93904e-07
3104_RPPDPGPTL_2_run0	1/sp|Q8IU68|TMC8_HUMAN	297124	1903.04	4.70477e-07	1903.04	0	6.9283e-07
327_FLWERPTLL_2_run0	1/sp|Q6IN84|MRM1_HUMAN	80352	4977.71	4.72705e-07	4977.71	0	6.94257e-07
147_AQYEHDLEV_2_run0	1/sp|P62826|RAN_HUMAN	41272	2343.63	4.74999e-07	2343.63	0	6.98215e-07
1737_APHLSKVSM_2_run0	1/sp|Q8N392|RHG18_HUMAN	71512	1649.81	4.76114e-07	1649.81	0	6.98919e-07
1322_TLWVDPYEV_2_run0	1/sp|P62324|BTG1_HUMAN	315861	4885.42	4.76699e-07	4885.42	0	7.01105e-07
1397_VLMEKPDVV_2_run0	1/sp|Q9NY93|DDX56_HUMAN	96736	2677.97	4.77582e-07	2677.97	0	7.0199e-07
1088_RLLEVPVML_2_run0	1/sp|Q96AB3|ISOC2_HUMAN	251066	4892.05	4.77644e-07	4892.05	0	7.02608e-07
1463_YAYDGKDYIAL_2_run0	1/sp|P01892|1A02_HUMAN	50978	3716.03	4.77981e-07	3716.03	0	7.0437e-07
1793_APMGIRLSP_2_run0	1/sp|Q9NX62|IMPA3_HUMAN	97392	3067.88	4.79808e-07	3067.88	0	7.05875e-07
1822_APRAGEQGEAM_2_run0	1/sp|Q5JSZ5|PRC2B_HUMAN	141763	891.08	4.83284e-07	891.08	0	7.08123e-07
3904_VPMFRNVSL_2_run0	1/sp|O14980|XPO1_HUMAN	441622	3847.68	4.83308e-07	3847.68	0	7.09593e-07
2465_KPRNVQILNM_2_run0	1/sp|Q5SRD1|TI23B_HUMAN	45051	2429.04	4.85978e-07	2429.04	0	7.13511e-07
3276_RPVPPPPSL_2_run0	1/sp|P13051|UNG_HUMAN	238872	2378.12	4.86223e-07	2378.12	0	7.13761e-07
1631_APAKAQSAL_2_run0	1/sp|Q5VWN6|F208B_HUMAN	227143	842.809	4.87683e-07	842.809	0	7.21425e-07
535_ILAQQPLSV_2_run0	1/sp|Q6ZRI6|CO039_HUMAN	138573	3344.84	4.88943e-07	3344.84	0	7.22899e-07
3320_RVNNNRGNSL_2_run0	1/sp|Q9Y5M8|SRPRB_HUMAN	79466	443.781	4.90857e-07	443.781	0	7.24823e-07
3439_SPGLRDVAL_2_run0	1/sp|Q13233|M3K1_HUMAN	204274	2893.09	4.90978e-07	2893.09	0	7.27438e-07
3542_SPQANRTYV_2_run0	1/sp|Q9Y2I7|FYV1_HUMAN	61493	1223.74	4.90978e-07	1223.74	0	7.35062e-07
1347_VLADQVWTL_2_run0	1/sp|O15527|OGG1_HUMAN	113035	4884.17	4.90978e-07	4884.17	0	7.3238e-07
1973_APSPSSSRSSF_2_run0	1/sp|Q6PCB5|RSBNL_HUMAN	40891	1300.82	4.92343e-07	1300.82	0	7.3528e-07
1058_RLFPGAPPTA_2_run0	1/sp|P17535|JUND_HUMAN	220827	2875.11	4.95619e-07	2875.11	0	7.38848e-07
810_KLYQRDLEV_2_run0	1/sp|Q96B01|R51A1_HUMAN	45473	2067.45	4.98489e-07	2067.45	0	7.41348e-07
2042_AVRLITSSL_2_run0	1/sp|O76031|CLPX_HUMAN	207983	3250.59	5.00789e-07	3250.59	0	7.4212e-07
603_ILWETVPSM_2_run0	1/sp|Q53EP0|FND3B_HUMAN	72898	4859	5.01762e-07	4859	0	7.54191e-07
1678_APASPFRQL_2_run0	1/sp|Q07021|C1QBP_HUMAN	361590	2834.27	5.05142e-07	2834.27	0	7.55376e-07
13_ALAAALAHI_2_run0	1/sp|Q9NR30|DDX21_HUMAN	108867	3529	5.0518e-07	3529	0	7.56194e-07
1893_APRPGLLSL_2_run0	1/sp|O95785|WIZ_HUMAN	430025	3540.99	5.06063e-07	3540.99	0	7.57473e-07
1175_SLAQYLINV_2_run0	1/sp|Q15366|PCBP2_HUMAN	144990	5151.13	5.07919e-07	5151.13	0	7.62552e-07
3334_SAMSGRNEL_2_run0	1/sp|Q68DK2|ZFY26_HUMAN	176545	1296.44	5.09298e-07	1296.44	0	7.63017e-07
1204_SLITRLLEV_2_run0	1/sp|P62140|PP1B_HUMAN	112429	5334.5	5.10457e-07	5334.5	0	7.64755e-07
1788_APLPRPGAVL_2_run0	1/sp|O75638|CTAG2_HUMAN	1772680	3063.51	5.12551e-07	3063.51	0	7.70965e-07
3790_TPKEKAQAL_2_run0	1/sp|P46013|KI67_HUMAN	125044	625.443	5.14879e-07	625.443	0	7.73004e-07
3510_SPMPGTLTAL_2_run0	1/sp|O60671|RAD1_HUMAN	106413	3963.86	5.15044e-07	3963.86	0	7.77034e-07
3080_RPMGAGEAL_2_run0	1/sp|Q12906|ILF3_HUMAN	663066	1574.99	5.15734e-07	1574.99	0	7.795e-07
2524_KPVKPHSSF_2_run0	1/sp|Q9Y520|PRC2C_HUMAN	111296	508.556	5.15741e-07	508.556	0	7.82233e-07
2377_KPIQRTILM_2_run0	1/sp|P13639|EF2_HUMAN	125254	2095.61	5.17307e-07	2095.61	0	7.87782e-07
1105_RLQDELVTL_2_run0	1/sp|Q9UPN3|MACF1_HUMAN	220781	3671.02	5.17622e-07	3671.02	0	7.91927e-07
2038_AVRGNAAVL_2_run0	1/sp|Q9BV81|EMC6_HUMAN	482913	1456.89	5.18452e-07	1456.89	0	7.95704e-07
3349_SPAFSTRVL_2_run0	1/sp|Q7KZF4|SND1_HUMAN	189781	2960.71	5.20789e-07	2960.71	0	8.00708e-07
2692_LPWPARPAL_2_run0	1/sp|Q86YV9|HPS6_HUMAN	693456	3979.38	5.23878e-07	3979.38	0	8.02116e-07
3557_SPQLGRAVQLL_2_run0	1/sp|Q8N2A8|PLD6_HUMAN	70899	3822.93	5.26973e-07	3822.93	0	8.0357e-07
737_KLLTEVHAA_2_run0	1/sp|P78325|ADAM8_HUMAN	57541	1570.62	5.28452e-07	1570.62	0	8.04026e-07
3890_VPHGHITSL_2_run0	1/sp|P41227|NAA10_HUMAN	134532	1531.32	5.2993e-07	1531.32	0	8.04443e-07
1008_PLPVQVFNL_2_run0	1/sp|Q13098|CSN1_HUMAN	45897	5538.82	5.30648e-07	5538.82	0	8.04936e-07
1137_RMFDGKFVVA_2_run0	1/sp|Q8TAS1|UHMK1_HUMAN	56146	3106.96	5.31753e-07	3106.96	0	8.06289e-07
1064_RLIEETISI_2_run0	1/sp|O95249|GOSR1_HUMAN	243663	3661.15	5.32595e-07	3661.15	0	8.08061e-07
1450_VQSMDVAAFNKI_2_run0	1/sp|P24534|EF1B_HUMAN	92077	3798.97	5.3273e-07	3798.97	0	8.18424e-07
1140_RMLPHAPGV_2_run0	1/sp|Q13547|HDAC1_HUMAN	1402370	1938.91	5.34582e-07	1938.91	0	8.19148e-07
184_FIVPLTDLRIPS_2_run0	1/sp|P04114|APOB_HUMAN	75954	5687.03	5.351e-07	5687.03	0	8.22205e-07
1441_VMFNGKVYL_2_run0	1/sp|Q5T3J3|LRIF1_HUMAN	50603	3830.93	5.35287e-07	3830.93	0	8.2463e-07
1916_APRSLLLAL_2_run0	1/sp|P15289|ARSA_HUMAN	74211	4442	5.37079e-07	4442	0	8.29916e-07
1682_APASWWNHM_2_run0	1/sp|O60427|FADS1_HUMAN	28733	3676.03	5.38224e-07	3676.03	0	8.31728e-07
3021_RPKAQPTTL_2_run0	1/sp|Q6P2C8|MED27_HUMAN	127017	863.454	5.38508e-07	863.454	0	8.31831e-07
418_GLIEKNIEL_2_run0	1/sp|P26358|DNMT1_HUMAN	404439	3472.42	5.38859e-07	3472.42	0	8.37504e-07
104_ALSKEGIVAL_2_run0	1/sp|P40227|TCPZ_HUMAN	151901	3174.66	5.4016e-07	3174.66	0	8.58887e-07
2341_KPASVFVQL_2_run0	1/sp|P19838|NFKB1_HUMAN	441119	3514.88	5.41979e-07	3514.88	0	8.62968e-07
3916_VPRASVPDGFL_2_run0	1/sp|P14174|MIF_HUMAN	54912	3651.48	5.45453e-07	3651.48	0	8.71302e-07
1901_APRPVAVAV_2_run0	1/sp|P49918|CDN1C_HUMAN	176635	2081.46	5.45748e-07	2081.46	0	8.88258e-07
3971_YPAAKRVKL_2_run0	1/sp|P01106|MYC_HUMAN	215084	1338.68	5.46845e-07	1338.68	0	8.90152e-07
99_ALRDVSEEL_2_run0	1/sp|P40222|TXLNA_HUMAN	414103	2577.82	5.48899e-07	2577.82	0	8.92553e-07
3241_RPSPPVQSV_2_run0	1/sp|Q5VV67|PPRC1_HUMAN	274792	1575.47	5.5014e-07	1575.47	0	8.93322e-07
2661_LPRTIFPTSTI_2_run0	1/sp|Q99590|SCAFB_HUMAN	114555	4199.47	5.5295e-07	4199.47	0	8.94624e-07
3254_RPSSTITYL_2_run0	1/sp|Q5SWH9|TMM69_HUMAN	341601	2575.69	5.54342e-07	2575.69	0	9.04399e-07
3313_RVGPVRSAM_2_run0	1/sp|Q96RU8|TRIB1_HUMAN	127788	1043.59	5.55652e-07	1043.59	0	9.08944e-07
800_KLYEAVPQL_2_run0	1/sp|O00311|CDC7_HUMAN	297115	3365.08	5.56886e-07	3365.08	0	9.10236e-07
2976_RPHFSIIAI_2_run0	1/sp|P42694|HELZ_HUMAN	117086	3744.07	5.59121e-07	3744.07	0	9.14164e-07
3230_RPSGAATTTAA_2_run0	1/sp|Q86TM6|SYVN1_HUMAN	42288	493.405	5.59933e-07	493.405	0	9.15474e-07
724_KLLFWVTEV_2_run0	1/sp|Q8NFH4|NUP37_HUMAN	17669	5389.87	5.60238e-07	5389.87	0	9.19992e-07
3873_VPAENKSVL_2_run0	1/sp|A2RUB6|CCD66_HUMAN	196204	1586.12	5.6044e-07	1586.12	0	9.20164e-07
1028_QLTNVILHL_2_run0	1/sp|Q9NQG6|MID51_HUMAN	101378	4468.67	5.60965e-07	4468.67	0	9.2633e-07
2235_IPEEQRAQL_2_run0	1/sp|Q15149|PLEC_HUMAN	70784	1858.51	5.61326e-07	1858.51	0	9.31854e-07
3453_SPHPAATAL_2_run0	1/sp|Q643R3|LPCT4_HUMAN	152308	1421.23	5.65474e-07	1421.23	0	9.40507e-07
1922_APRTFSNSL_2_run0	1/sp|Q99551|MTERF_HUMAN	85992	2056.07	5.69379e-07	2056.07	0	9.4478e-07
947_LMDHTIPEV_2_run0	1/sp|O00560|SDCB1_HUMAN	669469	3084.03	5.70446e-07	3084.03	0	9.45093e-07
1393_VLLSTIHEL_2_run0	1/sp|Q6I9Y2|THOC7_HUMAN	181087	3749.12	5.7144e-07	3749.12	0	9.47561e-07
3492_SPLNRAGLL_2_run0	1/sp|Q92979|NEP1_HUMAN	120077	2879.59	5.72936e-07	2879.59	0	9.50481e-07
1511_YLIEPDVEL_2_run0	1/sp|Q8IUR7|ARMC8_HUMAN	106777	4799.49	5.73338e-07	4799.49	0	9.51083e-07
1307_TLNDREYQL_2_run0	1/sp|P27708|PYR1_HUMAN	121426	2501.3	5.74271e-07	2501.3	0	9.65403e-07
2605_LPLPNFSSL_2_run0	1/sp|P08670|VIME_HUMAN	39027	5329.36	5.74345e-07	5329.36	0	9.67333e-07
1162_SISPIVLYL_2_run0	1/sp|Q53FV1|ORML2_HUMAN	40699	5858.21	5.7668e-07	5858.21	0	9.75736e-07
3875_VPAKKITAA_2_run0	1/sp|P50914|RL14_HUMAN	86415	600.342	5.77003e-07	600.342	0	9.79437e-07
748_KLNATNIEL_2_run0	1/sp|P28066|PSA5_HUMAN	250913	2937.96	5.7832e-07	2937.96	0	9.87758e-07
318_FLTKQEILL_2_run0	1/sp|Q99828|CIB1_HUMAN	130427	4008.54	5.79825e-07	4008.54	0	9.88918e-07
2563_LPAPPTQNM_2_run0	2/sp|Q15532|SSXT_HUMAN/sp|O75177|CREST_HUMAN	318366	2659.87	5.81548e-07	2659.87	0	9.95215e-07
483_GLYELVWRV_2_run0	1/sp|Q96E22|NGBR_HUMAN	31254	5188.88	5.82586e-07	5188.88	0	9.96169e-07
2829_QPREPQVYTL_2_run0	1/sp|P01857|IGHG1_HUMAN	318230	2767.05	5.85778e-07	2767.05	0	9.9754e-07
3769_TPAPVPTSL_2_run0	1/sp|Q9H7N4|SFR19_HUMAN	534106	3087.35	5.87394e-07	3087.35	0	9.99445e-07
3564_SPQQVSAQL_2_run0	1/sp|Q2TAL8|QRIC1_HUMAN	285465	2173.61	5.87528e-07	2173.61	0	9.99825e-07
3664_SPRVVSTSL_2_run0	1/sp|Q9Y6D5|BIG2_HUMAN	136999	1997.75	5.87645e-07	1997.75	0	1.0029e-06
876_LLDRFLATV_2_run0	1/sp|Q14094|CCNI_HUMAN	115858	4424.5	5.89817e-07	4424.5	0	1.00587e-06
2406_KPKTPSLTVF_2_run0	1/sp|P24928|RPB1_HUMAN	104412	2869.3	5.90583e-07	2869.3	0	1.01298e-06
1726_APGPPGRSML_2_run0	1/sp|Q8IY67|RAVR1_HUMAN	589262	2183.2	5.93211e-07	2183.2	0	1.01825e-06
2909_RPAQVSQPF_2_run0	1/sp|Q9Y520|PRC2C_HUMAN	301258	1945.89	5.93374e-07	1945.89	0	1.03452e-06
3102_RPNPITVIL_2_run0	1/sp|P35555|FBN1_HUMAN	191121	4031.59	5.94271e-07	4031.59	0	1.03502e-06
2103_GPAPRVLSL_2_run0	1/sp|P49750|YLPM1_HUMAN	167083	3097	5.9456e-07	3097	0	1.03596e-06
3860_TPSSRPASL_2_run0	1/sp|Q96S82|UBL7_HUMAN	172274	1227.68	5.9655e-07	1227.68	0	1.03934e-06
1714_APFLRNVEL_2_run0	1/sp|A5YKK6|CNOT1_HUMAN	1034210	3932.09	5.96717e-07	3932.09	0	1.044e-06
1122_RLVPFLVEL_2_run0	1/sp|Q92508|PIEZ1_HUMAN	37820	5598.51	5.99094e-07	5598.51	0	1.04462e-06
1712_APFEPLASGIL_2_run0	1/sp|P01033|TIMP1_HUMAN	94765	5314.77	6.02319e-07	5314.77	0	1.04476e-06
221_FLFDGSPTYV_2_run0	1/sp|P49327|FAS_HUMAN	85721	4926.87	6.03041e-07	4926.87	0	1.05132e-06
2865_RPAAPGQTPL_2_run0	1/sp|Q12796|PNRC1_HUMAN	124100	1640.99	6.04381e-07	1640.99	0	1.06043e-06
450_GLNEEIARV_2_run0	1/sp|O14777|NDC80_HUMAN	433797	2764.48	6.05435e-07	2764.48	0	1.06397e-06
1807_APNSRPALL_2_run0	1/sp|P55011|S12A2_HUMAN	136369	2091.65	6.06539e-07	2091.65	0	1.07027e-06
471_GLWEEAYRV_2_run0	1/sp|Q9UG01|IF172_HUMAN	58328	3839.96	6.09193e-07	3839.96	0	1.07141e-06
205_FLDESRSTQYM_2_run0	1/sp|Q9Y230|RUVB2_HUMAN	39929	2844.09	6.11903e-07	2844.09	0	1.08753e-06
1069_RLIESLFTI_2_run0	1/sp|Q12789|TF3C1_HUMAN	104503	5096.93	6.12846e-07	5096.93	0	1.09301e-06
1836_APREGQGSSAV_2_run0	1/sp|Q16566|KCC4_HUMAN	151728	582.317	6.16668e-07	582.317	0	1.09589e-06
3113_RPQAPATVGL_2_run0	1/sp|Q15370|ELOB_HUMAN	316329	2210.54	6.19085e-07	2210.54	0	1.10482e-06
2630_LPRETVAGAL_2_run0	1/sp|O95400|CD2B2_HUMAN	216471	2646	6.19907e-07	2646	0	1.10804e-06
1260_SMADIPLGFGV_2_run0	1/sp|Q9Y221|NIP7_HUMAN	95696	5364.09	6.2059e-07	5364.09	0	1.10932e-06
835_KVANIIAEV_2_run0	1/sp|P52306|GDS1_HUMAN	110730	3183.38	6.20739e-07	3183.38	0	1.11165e-06
3293_RPYEPINSI_2_run0	1/sp|Q8WUA4|TF3C2_HUMAN	259019	2672.75	6.21609e-07	2672.75	0	1.12006e-06
3268_RPTPKNSL_2_run0	1/sp|O95168|NDUB4_HUMAN	104013	624.584	6.23132e-07	624.584	0	1.12711e-06
3547_SPQDSRLYL_2_run0	1/sp|Q9HA65|TBC17_HUMAN	134083	2686.29	6.23395e-07	2686.29	0	1.1289e-06
3031_RPKGGSGDTL_2_run0	1/sp|Q96F44|TRI11_HUMAN	39668	449.499	6.24919e-07	449.499	0	1.12909e-06
2719_MPKLRVLEL_2_run0	1/sp|Q9NXK8|FXL12_HUMAN	55197	3954.88	6.25596e-07	3954.88	0	1.13218e-06
2712_MPDSLRSGEYL_2_run0	1/sp|Q8WYP5|ELYS_HUMAN	13387	3186.47	6.26031e-07	3186.47	0	1.14624e-06
56_ALLDKLYA_2_run0	1/sp|Q9NV31|IMP3_HUMAN	292412	3459.85	6.29361e-07	3459.85	0	1.14902e-06
1926_APRTVALTA_2_run0	1/sp|P04440|DPB1_HUMAN	3979430	1737.83	6.3045e-07	1737.83	0	1.15178e-06
3252_RPSSQYIVAL_2_run0	3/sp|Q01650|LAT1_HUMAN/sp|Q8MH63|LAT1N_HUMAN/sp|Q9GIP4|LAT1L_HUMAN	171765	3336.14	6.30585e-07	3336.14	0	1.15183e-06
2772_NPNMRLSQL_2_run0	1/sp|Q96CT7|CC124_HUMAN	188402	2741.44	6.31314e-07	2741.44	0	1.16307e-06
3905_VPMTSRLGL_2_run0	1/sp|P78527|PRKDC_HUMAN	133768	3121.55	6.31939e-07	3121.55	0	1.16325e-06
3857_TPSRKGLVL_2_run0	1/sp|Q9H4L4|SENP3_HUMAN	113539	1689.49	6.32926e-07	1689.49	0	1.16745e-06
432_GLLGNVAEV_2_run0	1/sp|Q7Z7L7|ZER1_HUMAN	73715	3939.55	6.33633e-07	3939.55	0	1.16938e-06
498_GTFIIDPGGVIR_2_run0	1/iRT|iRT_Biognosys|iRT_Biognosys	2158700	4295.68	6.35036e-07	4295.68	0	1.17716e-06
1495_YLFGERLL_2_run0	1/sp|Q9BYG3|MK67I_HUMAN	195303	4499.45	6.3604e-07	4499.45	0	1.17838e-06
2290_IPSIRNGIL_2_run0	1/sp|Q93008|USP9X_HUMAN	665538	3507.65	6.36625e-07	3507.65	0	1.18753e-06
3610_SPRLAAQKL_2_run0	1/sp|P49454|CENPF_HUMAN	196575	1471.74	6.40386e-07	1471.74	0	1.195e-06
1820_APRAALTRL_2_run0	1/sp|P83436|COG7_HUMAN	101898	1719.1	6.41286e-07	1719.1	0	1.19675e-06
337_FLYPFPLAL_2_run0	1/sp|Q5BJD5|TM41B_HUMAN	181557	6866.18	6.42909e-07	6866.18	0	1.19913e-06
525_IIFVPVPQL_2_run0	1/sp|P62081|RS7_HUMAN	188303	5817.02	6.44602e-07	5817.02	0	1.20257e-06
1081_RLLDSEIKI_2_run0	1/sp|P17980|PRS6A_HUMAN	141839	3258.45	6.44831e-07	3258.45	0	1.20726e-06
361_FVHDLVLYL_2_run0	1/sp|Q00610|CLH1_HUMAN	172814	5111.99	6.46982e-07	5111.99	0	1.21032e-06
3407_SPDSRASSL_2_run0	1/sp|Q9UHB6|LIMA1_HUMAN	147710	955.025	6.48266e-07	955.025	0	1.21301e-06
3067_RPLLKAITA_2_run0	1/sp|Q96GQ7|DDX27_HUMAN	103090	2132	6.49775e-07	2132	0	1.21756e-06
1097_RLMNETTAV_2_run0	1/sp|O95757|HS74L_HUMAN	136524	1802.8	6.5245e-07	1802.8	0	1.21927e-06
511_HLLPTAPTTV_2_run0	1/sp|Q6VMQ6|MCAF1_HUMAN	116506	3017.4	6.52828e-07	3017.4	0	1.21974e-06
3441_SPGPPAPHM_2_run0	1/sp|Q86SX3|CN080_HUMAN	83863	1776.32	6.53554e-07	1776.32	0	1.22487e-06
438_GLLPDVPSL_2_run0	1/sp|Q96N66|MBOA7_HUMAN	174857	5212.51	6.53961e-07	5212.51	0	1.22611e-06
38_ALFKAWAL_2_run0	1/sp|Q15306|IRF4_HUMAN	59658	4683.8	6.56417e-07	4683.8	0	1.22761e-06
305_FLQPELVKL_2_run0	1/sp|Q14997|PSME4_HUMAN	345861	4400.8	6.57794e-07	4400.8	0	1.238e-06
1421_VLVDRTIYI_2_run0	1/sp|P52758|UK114_HUMAN	205025	3740.74	6.57794e-07	3740.74	0	1.23031e-06
1983_APSRNGMVL_2_run0	1/sp|P26373|RL13_HUMAN	2657630	1923.47	6.60747e-07	1923.47	0	1.24479e-06
2890_RPAPAAPLL_2_run0	1/sp|Q96PM9|Z385A_HUMAN	798581	2604.58	6.60976e-07	2604.58	0	1.2486e-06
2710_MPARWLTHL_2_run0	1/sp|Q92685|ALG3_HUMAN	102012	3461.48	6.62804e-07	3461.48	0	1.2566e-06
3745_SPYPTKTQTM_2_run0	1/sp|P04843|RPN1_HUMAN	263225	1525.87	6.64218e-07	1525.87	0	1.26028e-06
2257_IPNERTMQL_2_run0	1/sp|Q8N1B4|VPS52_HUMAN	222729	2580.74	6.66466e-07	2580.74	0	1.26391e-06
3590_SPRGHLTSL_2_run0	1/sp|Q9NPQ8|RIC8A_HUMAN	145320	1290.04	6.70593e-07	1290.04	0	1.26744e-06
2555_LPAIGTGNAK_2_run0	1/sp|Q460N5|PAR14_HUMAN	253334	2428.39	6.74027e-07	2428.39	0	1.29705e-06
1404_VLMQDSRLYL_2_run0	1/sp|P06493|CDK1_HUMAN	21871	3925.58	6.75203e-07	3925.58	0	1.30175e-06
3561_SPQPRLIYL_2_run0	1/sp|Q96A54|ADR1_HUMAN	224622	3798.71	6.76861e-07	3798.71	0	1.30461e-06
2030_APYSRPKQL_2_run0	1/sp|Q86V81|THOC4_HUMAN	301198	1332	6.77794e-07	1332	0	1.3151e-06
897_LLLDVPTAAV_2_run0	1/sp|P13284|GILT_HUMAN	307939	4766.97	6.78571e-07	4766.97	0	1.32038e-06
509_HLLEEPIYL_2_run0	1/sp|Q9BUB4|ADAT1_HUMAN	187523	4288.24	6.79271e-07	4288.24	0	1.32225e-06
1945_APSDLRTIQTF_2_run0	1/sp|Q9BUL5|PHF23_HUMAN	41580	3255.96	6.79597e-07	3255.96	0	1.34327e-06
1925_APRTLVLLLSG_2_run0	1/sp|P01892|1A02_HUMAN	65289	4672.22	6.79863e-07	4672.22	0	1.34615e-06
1108_RLQEDPPVGV_2_run0	1/sp|P63146|UBE2B_HUMAN	1425430	2279.83	6.81933e-07	2279.83	0	1.34825e-06
1958_APSKSRLLATL_2_run0	2/sp|P0C0L5|CO4B_HUMAN/sp|P0C0L4|CO4A_HUMAN	77590	2625.55	6.844e-07	2625.55	0	1.34832e-06
544_ILDQKINEV_2_run0	1/sp|P11926|DCOR_HUMAN	358614	2418.47	6.84645e-07	2418.47	0	1.34841e-06
1067_RLIEQEEYL_2_run0	1/sp|Q9NTJ3|SMC4_HUMAN	72372	3049.94	6.8759e-07	3049.94	0	1.35488e-06
2387_KPKFILSVL_2_run0	1/sp|Q9BVK2|ALG8_HUMAN	78090	4087.16	6.88099e-07	4087.16	0	1.367e-06
2746_MPSQFRDIL_2_run0	1/sp|Q09472|EP300_HUMAN	173715	3947.17	6.88993e-07	3947.17	0	1.37792e-06
2860_RPAAIPIEI_2_run0	1/sp|Q9Y2H1|ST38L_HUMAN	360513	3744.67	6.8982e-07	3744.67	0	1.38493e-06
1022_QLMREVLLL_2_run0	1/sp|Q8TDB6|DTX3L_HUMAN	75260	4685.07	6.91597e-07	4685.07	0	1.38873e-06
1286_TLIDLPGITKV_2_run0	1/sp|P50570|DYN2_HUMAN	41044	4719.52	6.95472e-07	4719.52	0	1.39287e-06
2736_MPRIVNVTSL_2_run0	1/sp|Q8IWI9|MGAP_HUMAN	80618	3933.56	6.96015e-07	3933.56	0	1.39542e-06
1078_RLLDLENIQI_2_run0	1/sp|Q92556|ELMO1_HUMAN	50343	4932.78	6.97556e-07	4932.78	0	1.40084e-06
1306_TLMGHMLYL_2_run0	1/sp|Q9Y450|HBS1L_HUMAN	35139	4584.54	6.99273e-07	4584.54	0	1.40526e-06
1970_APSPPLRAL_2_run0	1/sp|Q14674|ESPL1_HUMAN	146965	2718.35	7.03829e-07	2718.35	0	1.4076e-06
944_LMAEMGVHSV_2_run0	1/sp|Q9NWZ5|UCKL1_HUMAN	71053	2781.31	7.04926e-07	2781.31	0	1.42154e-06
2140_GPQAVRAAL_2_run0	1/sp|O95602|RPA1_HUMAN	215860	1853.64	7.06871e-07	1853.64	0	1.42231e-06
2467_KPRNVVFVDM_2_run0	1/sp|P34932|HSP74_HUMAN	76993	2841.41	7.07757e-07	2841.41	0	1.43252e-06
3499_SPLRSSSAL_2_run0	1/sp|P59923|ZN445_HUMAN	446176	1544.37	7.07757e-07	1544.37	0	1.42632e-06
1211_SLLDRFLATV_2_run0	1/sp|Q14094|CCNI_HUMAN	57322	5816.59	7.08386e-07	5816.59	0	1.44114e-06
1891_APRPFPEVSL_2_run0	1/sp|Q96KV7|WDR90_HUMAN	108901	3928.71	7.08414e-07	3928.71	0	1.4474e-06
3503_SPMADRSMM(UniMod:35)_2_run0	1/sp|P18583|SON_HUMAN	96213	1143.73	7.09316e-07	1143.73	0	1.45339e-06
15_ALADKELLPSV_2_run0	1/sp|Q9BRQ8|AIFM2_HUMAN	80486	3651.5	7.09427e-07	3651.5	0	1.45436e-06
3578_SPRDSPAVSL_2_run0	1/sp|Q14687|GSE1_HUMAN	669297	2121.87	7.09741e-07	2121.87	0	1.45547e-06
1828_APRAVFPSI_2_run0	1/sp|P62736|ACTA_HUMAN	772986	3480.89	7.12343e-07	3480.89	0	1.45994e-06
1287_TLIDLPGITRV_2_run0	2/sp|P20592|MX2_HUMAN/sp|P20591|MX1_HUMAN	162752	4773.94	7.13619e-07	4773.94	0	1.47514e-06
4012_YVRDNTGVL_2_run0	1/sp|Q2NKJ3|CTC1_HUMAN	308244	1892.32	7.16422e-07	1892.32	0	1.47747e-06
2780_NPRIPYTEL_2_run0	1/sp|Q92830|KAT2A_HUMAN	769813	3342.21	7.17481e-07	3342.21	0	1.47877e-06
2340_KPASTSGKSEL_2_run0	1/sp|O75592|MYCB2_HUMAN	11786	492.328	7.18653e-07	492.328	0	1.48231e-06
1910_APRSEVEAL_2_run0	1/sp|Q9Y3P9|RBGP1_HUMAN	258527	1792.87	7.21872e-07	1792.87	0	1.48298e-06
3015_RPITVSYAF_2_run0	1/sp|Q15427|SF3B4_HUMAN	81684	3435.44	7.22087e-07	3435.44	0	1.48349e-06
2645_LPRLAGSLL_2_run0	1/sp|Q13724|MOGS_HUMAN	40617	4086.84	7.25758e-07	4086.84	0	1.49533e-06
2903_RPAPTAATTL_2_run0	1/sp|Q66K41|Z385C_HUMAN	110718	1678.8	7.25758e-07	1678.8	0	1.48978e-06
766_KLQNLNIFL_2_run0	1/sp|A0AVT1|UBA6_HUMAN	68279	4664.07	7.25985e-07	4664.07	0	1.51763e-06
3419_SPEQSRNVL_2_run0	1/sp|Q96JM3|CHAP1_HUMAN	162722	1370.83	7.27941e-07	1370.83	0	1.52074e-06
3382_SPAPTHNSL_2_run0	1/sp|P49327|FAS_HUMAN	701996	1049.05	7.28578e-07	1049.05	0	1.52416e-06
497_GTFIIDPAAVIR_2_run0	1/iRT|iRT_Biognosys|iRT_Biognosys	1958570	4873.59	7.29218e-07	4873.59	0	1.53217e-06
470_GLVPFLVSV_2_run0	1/sp|P52292|IMA1_HUMAN	671139	6021.94	7.30189e-07	6021.94	0	1.53936e-06
209_FLDHVMYTI_2_run0	1/sp|Q13422|IKZF1_HUMAN	25651	4311.54	7.33056e-07	4311.54	0	1.56534e-06
3040_RPKLPEDPLL_2_run0	1/sp|P49327|FAS_HUMAN	414212	3126.48	7.33922e-07	3126.48	0	1.5701e-06
1258_SLYREILFL_2_run0	1/sp|Q5VZ89|DEN4C_HUMAN	50907	5304.53	7.34478e-07	5304.53	0	1.5779e-06
445_GLMGAGIAQV_2_run0	1/sp|P40939|ECHA_HUMAN	51145	3702.03	7.35729e-07	3702.03	0	1.58157e-06
560_ILLDRLLYL_2_run0	1/sp|Q96FB5|RRNAD_HUMAN	12126	5761.37	7.36258e-07	5761.37	0	1.58238e-06
765_KLQNIMMLL_2_run0	1/sp|Q9NRZ9|HELLS_HUMAN	70658	5255.67	7.37571e-07	5255.67	0	1.5879e-06
2804_QIRSSTTSM_2_run0	1/sp|Q13200|PSMD2_HUMAN	179265	877.116	7.38617e-07	877.116	0	1.5891e-06
1114_RLSDVQIYV_2_run0	1/sp|P09913|IFIT2_HUMAN	223060	3466.02	7.40565e-07	3466.02	0	1.59068e-06
2279_IPRSFMMEV_2_run0	1/sp|Q7Z6E9|RBBP6_HUMAN	57177	3947.83	7.41277e-07	3947.83	0	1.59751e-06
2085_FPSLREAAL_2_run0	1/sp|P43355|MAGA1_HUMAN	262361	3655.72	7.4223e-07	3655.72	0	1.60044e-06
3459_SPIEKSGVL_2_run0	1/sp|Q8NG31|CASC5_HUMAN	198767	2011.01	7.44302e-07	2011.01	0	1.61024e-06
2250_IPLLGKSSL_2_run0	1/sp|Q9NYP3|DONS_HUMAN	124115	3546.87	7.46776e-07	3546.87	0	1.61089e-06
893_LLIPGLATA_2_run0	1/sp|O15239|NDUA1_HUMAN	294400	4766.99	7.49606e-07	4766.99	0	1.61386e-06
1870_APRKVLGSSTSA_2_run0	1/sp|Q15004|PAF15_HUMAN	27652	782.528	7.50645e-07	782.528	0	1.61484e-06
1303_TLLPLRVFL_2_run0	1/sp|Q6NXT6|TAPT1_HUMAN	134938	5816.83	7.51272e-07	5816.83	0	1.6164e-06
696_KLILLITQV_2_run0	1/sp|Q15061|WDR43_HUMAN	71108	4806.85	7.51653e-07	4806.85	0	1.61657e-06
2386_KPKEADESL_2_run0	1/sp|Q9Y490|TLN1_HUMAN	179218	680.473	7.52592e-07	680.473	0	1.61948e-06
807_KLYNPENIYL_2_run0	1/sp|P23258|TBG1_HUMAN	94736	3840.1	7.54592e-07	3840.1	0	1.62239e-06
3426_SPFHRNLFL_2_run0	1/sp|Q96EX3|WDR34_HUMAN	70056	3238.77	7.55765e-07	3238.77	0	1.63573e-06
3775_TPDAMKAAMAL_2_run0	1/sp|P02792|FRIL_HUMAN	52295	3481.09	7.57943e-07	3481.09	0	1.64132e-06
965_MLFPGSIAL_2_run0	1/sp|Q15691|MARE1_HUMAN	262969	5526.21	7.59241e-07	5526.21	0	1.65293e-06
3351_SPAGKTNAL_2_run0	1/sp|Q8NI35|INADL_HUMAN	270193	804.494	7.61027e-07	804.494	0	1.65606e-06
1881_APRNSAELTVI_2_run0	1/sp|O60566|BUB1B_HUMAN	145694	2729.23	7.64065e-07	2729.23	0	1.66087e-06
3641_SPRQLFSAL_2_run0	1/sp|Q9NTJ4|MA2C1_HUMAN	360594	3727.64	7.64573e-07	3727.64	0	1.66581e-06
586_ILQNKIDLV_2_run0	1/sp|P41091|IF2G_HUMAN	213045	3289.94	7.6588e-07	3289.94	0	1.66796e-06
2599_LPKTGTVSL_2_run0	1/sp|P49327|FAS_HUMAN	311905	2484.96	7.68457e-07	2484.96	0	1.67217e-06
3925_VPRNDSLSL_2_run0	1/sp|Q8NCD3|HJURP_HUMAN	233820	2306.21	7.69115e-07	2306.21	0	1.67697e-06
2629_LPRAVNTQAL_2_run0	1/sp|O60749|SNX2_HUMAN	423881	2489.11	7.70128e-07	2489.11	0	1.68157e-06
2180_HPINPRVAL_2_run0	1/sp|Q9P0U4|CXXC1_HUMAN	140219	2085.94	7.72779e-07	2085.94	0	1.68382e-06
2638_LPRGSRAHITL_3_run0	1/sp|P09543|CN37_HUMAN	166383	1746.91	7.76637e-07	1746.91	0	1.70433e-06
2766_NPKESSSSL_2_run0	1/sp|Q12789|TF3C1_HUMAN	123031	673.704	7.78943e-07	673.704	0	1.70452e-06
2199_HPRIASGLGL_2_run0	1/sp|O14880|MGST3_HUMAN	157294	2434.2	7.7905e-07	2434.2	0	1.71133e-06
2304_IVRKIGTNL_2_run0	1/sp|Q15390|MTFR1_HUMAN	23574	1618.79	7.82092e-07	1618.79	0	1.71324e-06
3983_YPKRPLLGL_2_run0	1/sp|Q9GZR7|DDX24_HUMAN	259080	2976.43	7.84053e-07	2976.43	0	1.72412e-06
1649_APAPIHNQF_2_run0	1/sp|Q15011|HERP1_HUMAN	335728	1976.79	7.87029e-07	1976.79	0	1.72594e-06
2868_RPADSM(UniMod:35)LNVL_2_run0	1/sp|Q9BTL4|IER2_HUMAN	111005	2685.92	7.89177e-07	2685.92	0	1.72687e-06
1615_AIRNAMGSL_2_run0	1/sp|P55036|PSMD4_HUMAN	636080	2225.03	7.9151e-07	2225.03	0	1.73052e-06
3721_SPTSQRLQL_2_run0	1/sp|Q99798|ACON_HUMAN	57085	2214.06	7.92997e-07	2214.06	0	1.74093e-06
3180_RPRKAFLL_2_run0	1/sp|P13667|PDIA4_HUMAN	154628	1723.57	7.95276e-07	1723.57	0	1.74414e-06
1387_VLLGKVYVV_2_run0	1/sp|Q6TFL4|KLH24_HUMAN	570532	3842.03	7.97255e-07	3842.03	0	1.74437e-06
1874_APRLGSRSQSL_2_run0	1/sp|Q9Y2H2|SAC2_HUMAN	31275	1380.09	7.97583e-07	1380.09	0	1.75008e-06
267_FLLHIQQQV_2_run0	1/sp|O95486|SC24A_HUMAN	126660	3734.66	7.98236e-07	3734.66	0	1.76431e-06
1780_APLLKRLSL_2_run0	1/sp|P54886|P5CS_HUMAN	59598	3253.8	7.99564e-07	3253.8	0	1.77718e-06
420_GLIGVGLINV_2_run0	1/sp|A3KN83|SBNO1_HUMAN	169369	5422.53	7.99564e-07	5422.53	0	1.76924e-06
721_KLLEPVPVSV_2_run0	1/sp|Q86W34|AMZ2_HUMAN	212242	3675.37	8.0315e-07	3675.37	0	1.78015e-06
1847_APRGQRPESAL_2_run0	1/sp|P28062|PSB8_HUMAN	69929	985.117	8.04653e-07	985.117	0	1.78452e-06
2006_APVAPHFAL_2_run0	1/sp|Q8WU76|SCFD2_HUMAN	88080	3546.62	8.06985e-07	3546.62	0	1.78484e-06
40_ALFPGVALL_2_run0	1/sp|P30101|PDIA3_HUMAN	104573	6018.62	8.0903e-07	6018.62	0	1.79534e-06
1378_VLLDAPIQL_2_run0	1/sp|Q9NUQ8|ABCF3_HUMAN	237079	5104.08	8.14521e-07	5104.08	0	1.79824e-06
2302_IVAKHTSAL_2_run0	1/sp|Q9Y490|TLN1_HUMAN	34621	829.38	8.16208e-07	829.38	0	1.79912e-06
3594_SPRGSTDSL_2_run0	1/sp|Q9UQQ2|SH2B3_HUMAN	218450	850.63	8.17684e-07	850.63	0	1.80381e-06
1989_APSSVAHTSM_2_run0	1/sp|Q9Y5U2|TSSC4_HUMAN	27367	1168.61	8.1852e-07	1168.61	0	1.80885e-06
1860_APRKGSFSAL_2_run0	1/sp|Q13619|CUL4A_HUMAN	64255	1506.46	8.19622e-07	1506.46	0	1.81214e-06
617_IVMEHVVFL_2_run0	1/sp|Q75V66|ANO5_HUMAN	83669	4613.6	8.22995e-07	4613.6	0	1.81693e-06
2049_EPRPPHGEL_2_run0	1/sp|P04818|TYSY_HUMAN	178591	1368.52	8.26585e-07	1368.52	0	1.83153e-06
2382_KPKAVGLQL_2_run0	1/sp|P48595|SPB10_HUMAN	47481	2052.87	8.27248e-07	2052.87	0	1.8321e-06
2133_GPNGGIVTSL_2_run0	1/sp|Q9HCN4|GPN1_HUMAN	211097	3194.63	8.30433e-07	3194.63	0	1.83412e-06
1605_AARAVTGVL_2_run0	1/sp|Q9UG63|ABCF2_HUMAN	1926470	2003.18	8.34737e-07	2003.18	0	1.84323e-06
2162_GPTEGRPQL_2_run0	1/sp|O15235|RT12_HUMAN	137315	1532.62	8.40737e-07	1532.62	0	1.85217e-06
890_LLIENVAS_2_run0	1/sp|P07203|GPX1_HUMAN	129005	3187.42	8.40995e-07	3187.42	0	1.8556e-06
339_FLYQYSTRL_2_run0	1/sp|Q9BUN8|DERL1_HUMAN	52941	3602.98	8.43442e-07	3602.98	0	1.85563e-06
1858_APRIITGPAPVL_2_run0	1/sp|Q96PU8|QKI_HUMAN	247048	3696	8.45256e-07	3696	0	1.85677e-06
3887_VPDTSRIYVAL_2_run0	1/sp|Q9UBK9|UXT_HUMAN	553937	3814.62	8.45538e-07	3814.62	0	1.85926e-06
3848_TPSGSREGSL_2_run0	1/sp|Q6P3S6|FBX42_HUMAN	249078	869.178	8.4618e-07	869.178	0	1.86512e-06
1589_YQYPVIIHL_2_run0	1/sp|Q9BW60|ELOV1_HUMAN	72400	4679.97	8.49302e-07	4679.97	0	1.86526e-06
2559_LPALRSIGL_2_run0	1/sp|P19793|RXRA_HUMAN	119466	4175.97	8.50041e-07	4175.97	0	1.86654e-06
127_ALWDKLFNL_2_run0	1/sp|Q8WXH0|SYNE2_HUMAN	33944	5947.84	8.50817e-07	5947.84	0	1.88841e-06
2054_FPDNQRPAL_2_run0	1/sp|P43268|ETV4_HUMAN	129517	2363.81	8.53835e-07	2363.81	0	1.89923e-06
1640_APAMIRISL_2_run0	1/sp|O75912|DGKI_HUMAN	134329	4170.63	8.55782e-07	4170.63	0	1.90393e-06
3930_VPRPPQTSL_2_run0	1/sp|O95785|WIZ_HUMAN	583152	2170.68	8.59724e-07	2170.68	0	1.91864e-06
65_ALLGGLVNV_2_run0	1/sp|Q8N4S7|PAQR4_HUMAN	33762	4997.6	8.617e-07	4997.6	0	1.92668e-06
3116_RPQDGVAVL_2_run0	1/sp|O00159|MYO1C_HUMAN	1083410	2181.61	8.63046e-07	2181.61	0	1.92851e-06
2785_NPRNTEAVTL_2_run0	1/sp|Q9UKF6|CPSF3_HUMAN	346802	1890.19	8.64475e-07	1890.19	0	1.93191e-06
118_ALVDQRELYL_2_run0	1/sp|Q9UL33|TPC2L_HUMAN	71006	3860.57	8.64547e-07	3860.57	0	1.93525e-06
4011_YVQSMDVAAF_2_run0	1/sp|P24534|EF1B_HUMAN	31772	3982.68	8.67803e-07	3982.68	0	1.93638e-06
2_AALPNVYEV_2_run0	1/sp|P33992|MCM5_HUMAN	193650	3809.56	8.69402e-07	3809.56	0	1.93741e-06
1680_APASRLLAL_2_run0	1/sp|Q96S16|JMJD8_HUMAN	202390	3412.67	8.70518e-07	3412.67	0	1.93797e-06
249_FLITQLKML_2_run0	1/sp|P03928|ATP8_HUMAN	29021	5238.9	8.71276e-07	5238.9	0	1.94973e-06
428_GLLDLPFRV_2_run0	1/sp|A6NHR9|SMHD1_HUMAN	118953	5597.39	8.73232e-07	5597.39	0	1.95637e-06
490_GMDRYLIYV_2_run0	1/sp|P05107|ITB2_HUMAN	81955	4376.35	8.76173e-07	4376.35	0	1.96242e-06
1132_RLYPEGLAQL_2_run0	1/sp|P61421|VA0D1_HUMAN	58523	3824.43	8.80318e-07	3824.43	0	1.9692e-06
3912_VPRAAFLSPL_2_run0	1/sp|P30040|ERP29_HUMAN	98176	4023.85	8.82517e-07	4023.85	0	1.97252e-06
2208_HPRTSITVVL_2_run0	1/sp|Q9NQT4|EXOS5_HUMAN	322834	2740.5	8.86091e-07	2740.5	0	1.99097e-06
2866_RPADPEKNQSL_2_run0	1/sp|Q9H8H0|NOL11_HUMAN	130525	972.063	8.88042e-07	972.063	0	1.99419e-06
1937_APRVLQQTL_2_run0	1/sp|O95373|IPO7_HUMAN	197865	2545.37	8.89502e-07	2545.37	0	1.9956e-06
3052_RPKSNIVL_2_run0	1/sp|P11836|CD20_HUMAN	172576	1446.15	8.89854e-07	1446.15	0	2.03834e-06
1060_RLGEAEGLMKV_3_run0	1/sp|Q9HBR0|S38AA_HUMAN	122191	2725.6	8.89854e-07	2725.6	0	2.01907e-06
612_IMLEALERV_2_run0	2/sp|P62308|RUXG_HUMAN/sp|A8MWD9|RUXGL_HUMAN	573911	4231.53	8.9128e-07	4231.53	0	2.04282e-06
3255_RPSSTSSASAL_2_run0	1/sp|Q13107|UBP4_HUMAN	115526	1004.07	8.92218e-07	1004.07	0	2.04508e-06
1943_APSAARELSL_2_run0	1/sp|Q9H668|STN1_HUMAN	137074	2603.6	8.92889e-07	2603.6	0	2.04567e-06
2792_NPRTKALVL_2_run0	3/sp|O95466|FMNL_HUMAN/sp|Q8IVF7|FMNL3_HUMAN/sp|Q96PY5|FMNL2_HUMAN	273525	1777.38	8.9479e-07	1777.38	0	2.06336e-06
519_HLYDIHVTV_2_run0	1/sp|A8MXV4|NUD19_HUMAN	56826	3315.92	8.98193e-07	3315.92	0	2.06542e-06
629_KILDYEVTL_2_run0	1/sp|P40189|IL6RB_HUMAN	52692	4023.03	8.99392e-07	4023.03	0	2.08621e-06
1379_VLLDHLSLA_2_run0	1/sp|P29459|IL12A_HUMAN	70165	4012	9.03663e-07	4012	0	2.11004e-06
2731_MPRGSGSGF_2_run0	1/sp|Q9NWH9|SLTM_HUMAN	79843	1316.34	9.05069e-07	1316.34	0	2.11644e-06
703_KLISELQKL_2_run0	1/sp|Q5UIP0|RIF1_HUMAN	57578	3051.39	9.06552e-07	3051.39	0	2.12463e-06
3576_SPRDPENFPFVV_2_run0	1/sp|P51149|RAB7A_HUMAN	89044	4520.27	9.08463e-07	4520.27	0	2.13446e-06
324_FLVTVIHTL_2_run0	1/sp|O60486|PLXC1_HUMAN	89410	4555.11	9.10081e-07	4555.11	0	2.14002e-06
3907_VPNQKRLTL_2_run0	1/sp|O60488|ACSL4_HUMAN	522818	1697.63	9.15046e-07	1697.63	0	2.17606e-06
2517_KPTHVVVTL_2_run0	1/sp|Q14690|RRP5_HUMAN	181293	2038.23	9.19227e-07	2038.23	0	2.18968e-06
1903_APRPYASSL_2_run0	1/sp|Q96EP0|RNF31_HUMAN	151778	1883.24	9.24812e-07	1883.24	0	2.19645e-06
2684_LPSTRLGTL_2_run0	1/sp|Q7KZF4|SND1_HUMAN	183310	2952.05	9.27801e-07	2952.05	0	2.19846e-06
3740_SPYFQRPLAL_2_run0	1/sp|P32929|CGL_HUMAN	31542	3898.61	9.2918e-07	3898.61	0	2.20165e-06
2840_QVRKAVDAL_2_run0	1/sp|O76021|RL1D1_HUMAN	56159	1234.52	9.35051e-07	1234.52	0	2.20235e-06
3647_SPRSNAGIATV_2_run0	1/sp|Q9Y6Y0|NS1BP_HUMAN	89249	1506.08	9.37711e-07	1506.08	0	2.21835e-06
231_FLFNKVVNL_2_run0	1/sp|P62699|YPEL5_HUMAN	142309	4766.44	9.40105e-07	4766.44	0	2.22092e-06
3115_RPQASALEL_2_run0	1/sp|P36956|SRBP1_HUMAN	214197	2464.97	9.41809e-07	2464.97	0	2.23139e-06
2313_KINKKRIAL_2_run0	1/sp|P18124|RL7_HUMAN	124406	697.242	9.4461e-07	697.242	0	2.25072e-06
1066_RLIEETQIFQM_2_run0	1/sp|Q68D86|C102B_HUMAN	96096	4334	9.45153e-07	4334	0	2.26307e-06
1955_APSHLMALLTL_2_run0	1/sp|Q9NZ32|ARP10_HUMAN	35389	5310.55	9.46083e-07	5310.55	0	2.27009e-06
2542_KVKEAGSSM_2_run0	1/sp|Q9Y3B9|RRP15_HUMAN	59306	350.152	9.47836e-07	350.152	0	2.28104e-06
599_ILVDTVWAL_2_run0	2/sp|O00505|IMA4_HUMAN/sp|O00629|IMA3_HUMAN	46914	5743.69	9.50397e-07	5743.69	0	2.2911e-06
1237_SLMSHAIEL_2_run0	1/sp|Q9Y263|PLAP_HUMAN	143042	3680	9.5285e-07	3680	0	2.29512e-06
1988_APSSPRPALP_2_run0	1/sp|P05362|ICAM1_HUMAN	400855	2123.66	9.56651e-07	2123.66	0	2.30135e-06
3903_VPMEIKPGISL_2_run0	1/sp|Q9NV88|INT9_HUMAN	39390	4041.74	9.56651e-07	4041.74	0	2.30326e-06
1540_YLNNVVEQL_2_run0	1/sp|Q13257|MD2L1_HUMAN	54627	4045.7	9.56982e-07	4045.7	0	2.30539e-06
846_KVLGIVVGV_2_run0	1/sp|A5YKK6|CNOT1_HUMAN	72228	3730.17	9.60056e-07	3730.17	0	2.30954e-06
3626_SPRPALPALL_2_run0	1/sp|P05362|ICAM1_HUMAN	322513	4064.22	9.62963e-07	4064.22	0	2.31399e-06
2436_KPQDYKKRLSV_3_run0	1/sp|P35222|CTNB1_HUMAN	36173	1244.78	9.65614e-07	1244.78	0	2.31762e-06
1153_SIIGRLLEV_2_run0	1/sp|P62136|PP1A_HUMAN	1788270	4925.17	9.68673e-07	4925.17	0	2.31996e-06
203_FLDEKTHEL_2_run0	1/sp|Q9H0K6|PUS7L_HUMAN	43701	2123.77	9.70596e-07	2123.77	0	2.3277e-06
1879_APRLQSEVAEL_2_run0	1/sp|P53990|IST1_HUMAN	1399090	3113.24	9.73656e-07	3113.24	0	2.32859e-06
2700_LVRPVFGEL_2_run0	1/sp|O00506|STK25_HUMAN	153180	3974.94	9.76111e-07	3974.94	0	2.33449e-06
417_GLIEILKKV_2_run0	1/sp|O14737|PDCD5_HUMAN	109135	4317.2	9.77328e-07	4317.2	0	2.33941e-06
3941_VPRTAAGGVGTL_2_run0	1/sp|P59044|NALP6_HUMAN	70872	1170.13	9.78076e-07	1170.13	0	2.3603e-06
1522_YLLEKSRAV_2_run0	1/sp|P35580|MYH10_HUMAN	33306	1797.53	9.80982e-07	1797.53	0	2.36322e-06
1213_SLLEKSLGL_2_run0	1/sp|O43324|MCA3_HUMAN	146516	3895.94	9.8412e-07	3895.94	0	2.36443e-06
1230_SLLSHVEQL_2_run0	1/sp|Q9UI95|MD2L2_HUMAN	126385	3793.48	9.84664e-07	3793.48	0	2.37049e-06
3488_SPKSALGSSAL_2_run0	1/sp|P16591|FER_HUMAN	65152	1945.1	9.8597e-07	1945.1	0	2.37263e-06
448_GLMTTVHAI_2_run0	1/sp|P04406|G3P_HUMAN	123646	3140.69	9.87371e-07	3140.69	0	2.3772e-06
609_ILYPSTLFL_2_run0	1/sp|P16298|PP2BB_HUMAN	20707	5857.49	9.90492e-07	5857.49	0	2.38043e-06
1100_RLPDDDPTAV_2_run0	1/sp|Q9UBF2|COPG2_HUMAN	70761	2018.16	9.94149e-07	2018.16	0	2.39877e-06
3498_SPLRGGSSL_2_run0	1/sp|P52798|EFNA4_HUMAN	91788	1463.96	9.9679e-07	1463.96	0	2.39964e-06
2606_LPMGALPQGPM_2_run0	1/sp|P04233|HG2A_HUMAN	111137	4108.66	9.98696e-07	4108.66	0	2.39971e-06
2483_KPRSPDHVL_2_run0	1/sp|Q9UPN3|MACF1_HUMAN	187393	844.939	1.00125e-06	844.939	0	2.40161e-06
2035_AVEPGRPPL_2_run0	1/sp|Q5TA31|RN187_HUMAN	802599	2079.22	1.00684e-06	2079.22	0	2.40455e-06
3064_RPLGKAASL_2_run0	1/sp|Q04637|IF4G1_HUMAN	104055	1154.1	1.00915e-06	1154.1	0	2.40586e-06
1770_APKRPPSAF_2_run0	3/sp|P26583|HMGB2_HUMAN/sp|P09429|HMGB1_HUMAN/sp|B2RPK0|HGB1A_HUMAN	587213	1268.34	1.01463e-06	1268.34	0	2.45114e-06
2078_FPRFGGSLAL_2_run0	1/sp|Q86YC3|NRROS_HUMAN	153890	4476.96	1.01653e-06	4476.96	0	2.45248e-06
3602_SPRIYSNSL_2_run0	1/sp|Q9Y2U8|MAN1_HUMAN	234383	2152.37	1.0182e-06	2152.37	0	2.45304e-06
3725_SPTYRALLL_2_run0	1/sp|P49795|RGS19_HUMAN	99283	3791.93	1.0223e-06	3791.93	0	2.46508e-06
1562_YLTAEILEL_2_run0	1/sp|Q96QV6|H2A1A_HUMAN	224067	5460.86	1.02566e-06	5460.86	0	2.46579e-06
1724_APGPGRKEL_2_run0	1/sp|Q9HBH0|RHOF_HUMAN	818635	788.064	1.03072e-06	788.064	0	2.48792e-06
2266_IPRGPASQF_2_run0	1/sp|P49750|YLPM1_HUMAN	114944	2177.5	1.03229e-06	2177.5	0	2.49025e-06
1513_YLINEIDRI_2_run0	1/sp|Q03001|DYST_HUMAN	69577	4225.33	1.03598e-06	4225.33	0	2.49308e-06
3516_SPMSVNAVM_2_run0	1/sp|P50991|TCPD_HUMAN	56563	3134.61	1.03878e-06	3134.61	0	2.5044e-06
624_KIGSIIFQV_2_run0	1/sp|Q460N5|PAR14_HUMAN	141335	4321.35	1.03908e-06	4321.35	0	2.50577e-06
2113_GPDSTRHTTL_2_run0	1/sp|Q14582|MAD4_HUMAN	22090	747.994	1.04107e-06	747.994	0	2.53076e-06
791_KLWGQSIQL_2_run0	1/sp|Q5T5J6|SWT1_HUMAN	75934	4006.28	1.0419e-06	4006.28	0	2.54025e-06
1110_RLQEEVHLL_2_run0	1/sp|Q674X7|KAZRN_HUMAN	117391	2880.11	1.04647e-06	2880.11	0	2.54061e-06
891_LLIENVASL_2_run0	1/sp|P07203|GPX1_HUMAN	515910	4725.8	1.04711e-06	4725.8	0	2.54454e-06
29_ALDSQVPKV_2_run0	1/sp|Q5JSP0|FGD3_HUMAN	122459	2393.87	1.04931e-06	2393.87	0	2.56411e-06
1489_YLDQTLPRA_2_run0	1/sp|A8MPP1|D11L8_HUMAN	142429	2513.47	1.05041e-06	2513.47	0	2.56503e-06
2013_APVLPHTAV_2_run0	2/sp|Q8NHM5|KDM2B_HUMAN/sp|Q6PCT2|FXL19_HUMAN	486002	2385.52	1.05645e-06	2385.52	0	2.56516e-06
1474_YLADIFTKL_2_run0	1/sp|Q49AG3|ZBED5_HUMAN	132736	5078.38	1.0584e-06	5078.38	0	2.56805e-06
2897_RPAPLVQQL_2_run0	1/sp|Q9Y6X9|MORC2_HUMAN	72854	2702.69	1.06064e-06	2702.69	0	2.57384e-06
499_GVIDGHIYAV_2_run0	1/sp|Q14145|KEAP1_HUMAN	184428	3291.11	1.06182e-06	3291.11	0	2.57863e-06
3617_SPRLSSSL_2_run0	1/sp|O14974|MYPT1_HUMAN	152981	1814.77	1.06242e-06	1814.77	0	2.58102e-06
377_GLAAGGIVAV_2_run0	1/sp|Q9ULH7|MKL2_HUMAN	98112	3599.03	1.06581e-06	3599.03	0	2.59197e-06
2996_RPIASGPVV_2_run0	1/sp|Q86TG7|PEG10_HUMAN	260844	1884.72	1.06784e-06	1884.72	0	2.60285e-06
3825_TPRKDFTQL_2_run0	1/sp|O15264|MK13_HUMAN	82786	1782.55	1.06924e-06	1782.55	0	2.60731e-06
3285_RPWLRPAAL_2_run0	1/sp|Q8N4S7|PAQR4_HUMAN	202683	2897.7	1.0706e-06	2897.7	0	2.61041e-06
463_GLVASLISV_2_run0	1/sp|O95347|SMC2_HUMAN	83382	4968.93	1.07428e-06	4968.93	0	2.61465e-06
60_ALLDVTPKAV_2_run0	1/sp|Q9UDY2|ZO2_HUMAN	63127	3337.68	1.07545e-06	3337.68	0	2.62027e-06
1090_RLLPPGAVVAV_2_run0	1/sp|Q7Z7A3|CTU1_HUMAN	132777	3780.28	1.07849e-06	3780.28	0	2.6322e-06
1655_APAPQGVRL_2_run0	1/sp|Q6PGN9|PSRC1_HUMAN	59085	2097.08	1.08334e-06	2097.08	0	2.6612e-06
3025_RPKEKSLVL_2_run0	1/sp|Q92985|IRF7_HUMAN	224565	1224.42	1.08527e-06	1224.42	0	2.68741e-06
2677_LPSPFLRAL_2_run0	1/sp|O95456|PSMG1_HUMAN	61455	4513.1	1.08851e-06	4513.1	0	2.69402e-06
2742_MPSASRVILL_2_run0	2/sp|Q14999|CUL7_HUMAN/sp|Q8IWT3|CUL9_HUMAN	142555	3875.5	1.08965e-06	3875.5	0	2.69589e-06
908_LLLPGELAKHAV_3_run0	15/sp|P57053|H2BFS_HUMAN/sp|Q8N257|H2B3B_HUMAN/sp|Q5QNW6|H2B2F_HUMAN/sp|Q16778|H2B2E_HUMAN/sp|P23527|H2B1O_HUMAN/sp|Q99877|H2B1N_HUMAN/sp|Q99879|H2B1M_HUMAN/sp|Q99880|H2B1L_HUMAN/sp|O60814|H2B1K_HUMAN/sp|P06899|H2B1J_HUMAN/sp|Q93079|H2B1H_HUMAN/sp|P58876|H2B1D_HUMAN/sp|P62807|H2B1C_HUMAN/sp|P33778|H2B1B_HUMAN/sp|Q96A08|H2B1A_HUMAN	82416	3647.87	1.09197e-06	3647.87	0	2.70311e-06
2863_RPAANPIQF_2_run0	1/sp|P23921|RIR1_HUMAN	812548	2746.88	1.09504e-06	2746.88	0	2.72569e-06
2717_MPKKDARTL_2_run0	1/sp|P29083|T2EA_HUMAN	41184	619.19	1.09527e-06	619.19	0	2.72732e-06
711_KLLDLMPRL_2_run0	1/sp|Q96HW7|INT4_HUMAN	90003	4573.85	1.09728e-06	4573.85	0	2.75862e-06
3224_RPSASTQAL_2_run0	1/sp|Q16531|DDB1_HUMAN	1172080	1175.31	1.09886e-06	1175.31	0	2.75955e-06
3851_TPSLVKSTSQL_2_run0	1/sp|Q06055|AT5G2_HUMAN	1776790	2538.22	1.09956e-06	2538.22	0	2.76823e-06
3682_SPSKTRGQIQV_2_run0	1/sp|P04183|KITH_HUMAN	22532	1037.52	1.10134e-06	1037.52	0	2.80555e-06
208_FLDHIIASV_2_run0	1/sp|Q7LBC6|KDM3B_HUMAN	63689	4240.32	1.10338e-06	4240.32	0	2.80728e-06
1845_APRGLEPIAI_2_run0	1/sp|O43315|AQP9_HUMAN	413123	3506.27	1.10463e-06	3506.27	0	2.83127e-06
1115_RLSEAIVTV_2_run0	1/sp|Q5SWH9|TMM69_HUMAN	364774	2921.05	1.10805e-06	2921.05	0	2.83221e-06
1816_APQRSQSPL_2_run0	1/sp|O95817|BAG3_HUMAN	131422	1045.43	1.1095e-06	1045.43	0	2.83453e-06
1357_VLFENTDSVHL_2_run0	1/sp|P42696|RBM34_HUMAN	62705	3924.31	1.11154e-06	3924.31	0	2.84087e-06
2496_KPSESIYSAL_2_run0	1/sp|Q6SJ93|F111B_HUMAN	101407	2964.62	1.11233e-06	2964.62	0	2.84366e-06
312_FLSSVIQNL_2_run0	1/sp|Q99460|PSMD1_HUMAN	113966	4867.32	1.11362e-06	4867.32	0	2.87039e-06
2796_NVRIATTAL_2_run0	1/sp|Q13571|LAPM5_HUMAN	2101410	2580.19	1.11536e-06	2580.19	0	2.87889e-06
2238_IPISLHTSL_2_run0	1/sp|Q5JSZ5|PRC2B_HUMAN	117353	3627.26	1.11902e-06	3627.26	0	2.88301e-06
1059_RLFSSIVTV_2_run0	1/sp|Q9NX74|DUS2L_HUMAN	249007	3993.69	1.12168e-06	3993.69	0	2.88835e-06
501_HIIENIVAV_2_run0	1/sp|O76021|RL1D1_HUMAN	1359760	3436.45	1.12425e-06	3436.45	0	2.88892e-06
514_HLSIINEYL_2_run0	1/sp|P46940|IQGA1_HUMAN	107567	4318.34	1.12708e-06	4318.34	0	2.90276e-06
1492_YLEELPEKLKL_3_run0	2/sp|P46439|GSTM5_HUMAN/sp|P09488|GSTM1_HUMAN	38530	4044.5	1.13267e-06	4044.5	0	2.90321e-06
2374_KPILSTRSL_2_run0	1/sp|O95456|PSMG1_HUMAN	224148	2051.45	1.13637e-06	2051.45	0	2.9244e-06
1134_RLYQGINQL_2_run0	1/sp|P43246|MSH2_HUMAN	157949	2857.99	1.14241e-06	2857.99	0	2.92526e-06
1487_YLDPAQRGV_2_run0	1/sp|Q96S19|CP013_HUMAN	247452	1984.08	1.14519e-06	1984.08	0	2.93296e-06
2011_APVGVHPSL_2_run0	1/sp|A6NFQ2|F115C_HUMAN	62459	2204.34	1.14607e-06	2204.34	0	2.93484e-06
1143_RVFENIVAV_2_run0	1/sp|Q13077|TRAF1_HUMAN	172816	3527.97	1.14889e-06	3527.97	0	2.96697e-06
390_GLATDVQTV_2_run0	1/sp|P49720|PSB3_HUMAN	594174	2601.59	1.15235e-06	2601.59	0	2.9899e-06
2166_GVRPVSGDL_2_run0	1/sp|Q9Y2U8|MAN1_HUMAN	105595	1807.62	1.15575e-06	1807.62	0	3.00524e-06
2972_RPGVSILAL_2_run0	1/sp|Q13206|DDX10_HUMAN	82306	3952	1.15742e-06	3952	0	3.03235e-06
3920_VPRIQPQSL_2_run0	1/sp|Q9NVR5|KTU_HUMAN	628398	2668.33	1.16098e-06	2668.33	0	3.03776e-06
1697_APDSQRLKL_2_run0	1/sp|Q9UQE7|SMC3_HUMAN	275105	1716.31	1.16297e-06	1716.31	0	3.03928e-06
1580_YMAELIERL_2_run0	1/sp|O75496|GEMI_HUMAN	84179	4479.83	1.16407e-06	4479.83	0	3.04624e-06
3726_SPVAHRVAL_2_run0	1/sp|Q8TEZ7|MPRB_HUMAN	63994	1460.82	1.16699e-06	1460.82	0	3.05531e-06
1049_RLAVYIDKV_2_run0	1/sp|P20700|LMNB1_HUMAN	60874	2784	1.16908e-06	2784	0	3.07855e-06
3365_SPAKNPSSL_2_run0	1/sp|Q9GZR7|DDX24_HUMAN	275700	966.601	1.17139e-06	966.601	0	3.0809e-06
1764_APKPGGLSL_2_run0	1/sp|Q8NCH0|CHSTE_HUMAN	175494	2355.02	1.17398e-06	2355.02	0	3.10966e-06
1018_QLLEKVIEL_2_run0	1/sp|Q9NTX5|ECHD1_HUMAN	75904	4356.7	1.17479e-06	4356.7	0	3.13701e-06
157_AVLSKEYGFVL_2_run0	1/sp|O14880|MGST3_HUMAN	40290	4389.98	1.17569e-06	4389.98	0	3.15132e-06
3179_RPRHQGVMVGM_3_run0	1/sp|P62736|ACTA_HUMAN	330629	1291.98	1.17837e-06	1291.98	0	3.15288e-06
1596_YVVPFVAKV_2_run0	1/sp|A5YKK6|CNOT1_HUMAN	106036	4153.25	1.17918e-06	4153.25	0	3.15937e-06
236_FLHDHVDLQV_2_run0	1/sp|P78344|IF4G2_HUMAN	59843	3100.73	1.18077e-06	3100.73	0	3.17981e-06
3861_TPSSSRLEL_2_run0	1/sp|Q9C0C7|AMRA1_HUMAN	312688	2203.78	1.18338e-06	2203.78	0	3.21257e-06
2784_NPRNFSDNQL_2_run0	1/sp|P37802|TAGL2_HUMAN	24430	1990.45	1.18871e-06	1990.45	0	3.21745e-06
258_FLLDKPQDLSI_2_run0	1/sp|Q6ZN28|MACC1_HUMAN	27026	4507.39	1.19097e-06	4507.39	0	3.22201e-06
1868_APRKSGAESWL_2_run0	1/sp|O95905|SGT1_HUMAN	23175	2100.36	1.19632e-06	2100.36	0	3.22293e-06
3934_VPRPTSTVGL_2_run0	1/sp|Q9BSJ1|TRI51_HUMAN	382689	2353.57	1.20002e-06	2353.57	0	3.22611e-06
1612_AAVRIGSVL_2_run0	1/sp|Q9Y5B0|CTDP1_HUMAN	77137	3068.67	1.20286e-06	3068.67	0	3.23778e-06
3528_SPNPDREAIL_2_run0	1/sp|Q7Z4L5|TT21B_HUMAN	105341	2194.54	1.20574e-06	2194.54	0	3.26463e-06
2178_HPHSNQSSL_2_run0	1/sp|Q9UPW0|FOXJ3_HUMAN	37855	390.656	1.21017e-06	390.656	0	3.27867e-06
937_LLWGNLPEI_2_run0	1/sp|Q5TYM5|FA72A_HUMAN	55774	5901.3	1.21452e-06	5901.3	0	3.28955e-06
2416_KPLSGLLNAL_2_run0	1/sp|Q8N668|COMD1_HUMAN	47713	4438.02	1.21749e-06	4438.02	0	3.30384e-06
3228_RPSERPSL_2_run0	1/sp|Q86V86|PIM3_HUMAN	119697	999.27	1.22108e-06	999.27	0	3.33574e-06
2404_KPKSVSKKL_2_run0	1/sp|Q8IYM9|TRI22_HUMAN	50257	276.467	1.22502e-06	276.467	0	3.34134e-06
3077_RPLYKNIVL_2_run0	1/sp|P61158|ARP3_HUMAN	935365	2998	1.23143e-06	2998	0	3.3421e-06
59_ALLDSAHLL_2_run0	1/sp|O14617|AP3D1_HUMAN	164156	4077.57	1.23636e-06	4077.57	0	3.34234e-06
915_LLMVLSPRL_2_run0	1/sp|Q00610|CLH1_HUMAN	46163	4673.57	1.24521e-06	4673.57	0	3.35228e-06
1156_SILEDPPSI_2_run0	1/sp|Q9NVM9|ASUN_HUMAN	540284	3953.2	1.25006e-06	3953.2	0	3.35388e-06
2456_KPRGLFITI_2_run0	1/sp|P48163|MAOX_HUMAN	77069	3641.62	1.25329e-06	3641.62	0	3.36008e-06
2008_APVERAQL_2_run0	1/sp|Q9HBH1|DEFM_HUMAN	90051	1488.91	1.25787e-06	1488.91	0	3.36318e-06
1657_APAPRPSLL_2_run0	1/sp|Q92620|PRP16_HUMAN	691998	2458.16	1.26193e-06	2458.16	0	3.37247e-06
3405_SPDPLRPLEFL_2_run0	1/sp|Q4VC44|FWCH1_HUMAN	33171	5361.54	1.26484e-06	5361.54	0	3.40467e-06
425_GLKNGVPAV_2_run0	1/sp|P53621|COPA_HUMAN	393466	2006.04	1.26709e-06	2006.04	0	3.41489e-06
3593_SPRGSGSSTSL_2_run0	1/sp|Q9H7P9|PKHG2_HUMAN	169232	754.945	1.26941e-06	754.945	0	3.46381e-06
1671_APARGLLLF_2_run0	1/sp|Q9UBP0|SPAST_HUMAN	206975	4439.63	1.27352e-06	4439.63	0	3.46552e-06
3734_SPVVKGNAL_2_run0	1/sp|Q5VW36|FOCAD_HUMAN	193285	1556.13	1.27816e-06	1556.13	0	3.46975e-06
732_KLLPSVTEL_2_run0	1/sp|P21675|TAF1_HUMAN	49176	3749.98	1.28255e-06	3749.98	0	3.47878e-06
2686_LPSWGRAELAL_2_run0	1/sp|Q96EP0|RNF31_HUMAN	39140	4541.2	1.28459e-06	4541.2	0	3.48123e-06
1644_APAPARSLL_2_run0	1/sp|Q6QNY0|BL1S3_HUMAN	96102	2241.18	1.28683e-06	2241.18	0	3.48322e-06
3938_VPRQPTVTSV_2_run0	1/sp|Q96HC4|PDLI5_HUMAN	163713	1921.33	1.28771e-06	1921.33	0	3.48659e-06
1928_APRTVALTALL_2_run0	1/sp|P04440|DPB1_HUMAN	1153970	4504.45	1.28856e-06	4504.45	0	3.50721e-06
3027_RPKENSMSTL_2_run0	1/sp|Q9H992|MARH7_HUMAN	29393	1056.01	1.29125e-06	1056.01	0	3.51163e-06
1148_RVSDINFTL_2_run0	1/sp|Q5H9R7|PP6R3_HUMAN	513313	3849.43	1.29286e-06	3849.43	0	3.53142e-06
1701_APEEHPVL_2_run0	1/sp|P60709|ACTB_HUMAN	165442	1721.02	1.29433e-06	1721.02	0	3.54761e-06
1186_SLFGGSVKL_2_run0	1/sp|Q8WUM4|PDC6I_HUMAN	250052	3891.76	1.29703e-06	3891.76	0	3.54771e-06
1426_VLWDRTFSL_2_run0	1/sp|P42224|STAT1_HUMAN	421590	4797.83	1.29845e-06	4797.83	0	3.55579e-06
82_ALMPTLEAL_2_run0	1/sp|Q92793|CBP_HUMAN	34351	5033.67	1.30095e-06	5033.67	0	3.55676e-06
2059_FPHLLQPVLW_2_run0	1/sp|P55060|XPO2_HUMAN	51548	5640.91	1.30317e-06	5640.91	0	3.56242e-06
699_KLIPLLLQL_2_run0	1/sp|Q5JPE7|NOMO2_HUMAN	41601	5801.66	1.3047e-06	5801.66	0	3.58124e-06
1727_APGPRGSYL_2_run0	1/sp|A0AV96|RBM47_HUMAN	123626	1821.19	1.30738e-06	1821.19	0	3.62088e-06
3821_TPRGGVGSVAL_2_run0	1/sp|Q9P2G9|KLHL8_HUMAN	271083	2288.39	1.30907e-06	2288.39	0	3.62647e-06
255_FLLDGKVLSL_2_run0	1/sp|Q8N1F8|S11IP_HUMAN	23827	5195.27	1.31085e-06	5195.27	0	3.63486e-06
3063_RPLFPGSTV_2_run0	1/sp|Q00536|CDK16_HUMAN	393177	2966.05	1.31219e-06	2966.05	0	3.63531e-06
176_FILPDSLPLDTL_2_run0	1/sp|P62314|SMD1_HUMAN	10627	6341.48	1.31829e-06	6341.48	0	3.63723e-06
3932_VPRPPSNPP_2_run0	1/sp|O43734|CIKS_HUMAN	267074	1614.16	1.32249e-06	1614.16	0	3.65408e-06
2653_LPRPPPPEM_2_run0	1/sp|Q00325|MPCP_HUMAN	293856	2457.27	1.3242e-06	2457.27	0	3.66179e-06
1661_APAPTVRLGL_2_run0	1/sp|P55199|ELL_HUMAN	73943	3319.66	1.32525e-06	3319.66	0	3.68558e-06
1435_VLYPHEPTAV_2_run0	1/sp|Q9NYP3|DONS_HUMAN	52704	2635.02	1.32735e-06	2635.02	0	3.68824e-06
2195_HPRDPNLLLSV_2_run0	1/sp|O75530|EED_HUMAN	252984	3274.04	1.32846e-06	3274.04	0	3.68874e-06
1517_YLISQVEGHQV_2_run0	1/sp|Q9Y3C4|TPRKB_HUMAN	51941	3078.25	1.32955e-06	3078.25	0	3.68987e-06
1708_APESKHKSSL_2_run0	1/sp|Q8TCJ2|STT3B_HUMAN	13595	294.893	1.33362e-06	294.893	0	3.71818e-06
2636_LPRGMQPTEF_2_run0	1/sp|P28062|PSB8_HUMAN	399388	3022.53	1.33998e-06	3022.53	0	3.72378e-06
2789_NPRQVFNLL_2_run0	1/sp|P23743|DGKA_HUMAN	49689	4175.13	1.34447e-06	4175.13	0	3.73994e-06
474_GLWGPEEEPHL_2_run0	1/sp|Q5JSZ5|PRC2B_HUMAN	53982	4059.71	1.34762e-06	4059.71	0	3.743e-06
1360_VLFGVETHV_2_run0	1/sp|Q96CN7|ISOC1_HUMAN	134824	3510.17	1.34762e-06	3510.17	0	3.75979e-06
2047_EPCNGRTAL_2_run0	1/sp|P25963|IKBA_HUMAN	838067	1276.65	1.35044e-06	1276.65	0	3.76231e-06
3119_RPQEVSAYL_2_run0	1/sp|Q6NXE6|ARMC6_HUMAN	246201	2706.17	1.35117e-06	2706.17	0	3.76327e-06
3425_SPFGKDVRLVSL_2_run0	1/sp|A8MPP1|D11L8_HUMAN	31459	3838.54	1.3599e-06	3838.54	0	3.76369e-06
2529_KPVYPGQTL_2_run0	1/sp|P51659|DHB4_HUMAN	530023	2110.82	1.36372e-06	2110.82	0	3.76621e-06
565_ILLPSVFGV_2_run0	1/sp|Q53EU6|GPAT3_HUMAN	15846	5959.22	1.36957e-06	5959.22	0	3.77364e-06
1429_VLWGETVHL_2_run0	1/sp|P41279|M3K8_HUMAN	120847	4291.43	1.37084e-06	4291.43	0	3.81154e-06
3_ADVTPADFSEWSK_2_run0	1/iRT|iRT_Biognosys|iRT_Biognosys	969503	3699.04	1.3743e-06	3699.04	0	3.81866e-06
922_LLPEGPPAI_2_run0	1/sp|Q15011|HERP1_HUMAN	106499	3841.94	1.37761e-06	3841.94	0	3.82402e-06
691_KLIEKLDIKL_3_run0	1/sp|P13639|EF2_HUMAN	52316	3435.15	1.38164e-06	3435.15	0	3.83245e-06
2751_MPTIPALAL_2_run0	1/sp|Q92608|DOCK2_HUMAN	164007	5416.16	1.38428e-06	5416.16	0	3.83344e-06
1538_YLNDLIHSV_2_run0	1/sp|O43572|AKA10_HUMAN	67271	3884.06	1.38724e-06	3884.06	0	3.84074e-06
616_IVLPAGALHQV_2_run0	1/sp|Q15652|JHD2C_HUMAN	79784	3657.23	1.39406e-06	3657.23	0	3.8437e-06
3030_RPKGESKDL_2_run0	1/sp|Q16531|DDB1_HUMAN	64709	321.144	1.3984e-06	321.144	0	3.86954e-06
1249_SLVDTVYAL_2_run0	1/sp|Q15052|ARHG6_HUMAN	43437	4679.05	1.40116e-06	4679.05	0	3.87466e-06
3665_SPRWGGIM_2_run0	1/sp|Q96S52|PIGS_HUMAN	64576	3062.63	1.40158e-06	3062.63	0	3.89228e-06
256_FLLDKALLI_2_run0	1/sp|P15498|VAV_HUMAN	47380	5387.23	1.40461e-06	5387.23	0	3.90955e-06
1198_SLIKQIPRI_2_run0	1/sp|P62906|RL10A_HUMAN	186014	3245.66	1.41035e-06	3245.66	0	3.92139e-06
160_DGLDAASYYAPVR_2_run0	1/iRT|iRT_Biognosys|iRT_Biognosys	488121	3330.93	1.41483e-06	3330.93	0	3.92623e-06
1405_VLMTEDIKL_2_run0	1/sp|Q04637|IF4G1_HUMAN	385227	3940.71	1.41819e-06	3940.71	0	3.93647e-06
1507_YLHSQVVSV_2_run0	1/sp|Q03519|TAP2_HUMAN	162851	2377.25	1.42434e-06	2377.25	0	3.94518e-06
3662_SPRVQFQSL_2_run0	1/sp|Q8N720|ZN655_HUMAN	551293	2883.59	1.42581e-06	2883.59	0	3.94649e-06
3232_RPSGPGPEL_2_run0	1/sp|P51531|SMCA2_HUMAN	4062800	1613.24	1.42732e-06	1613.24	0	3.95045e-06
3322_RVQEPGAVL_2_run0	1/sp|Q9NYB0|TE2IP_HUMAN	236134	2062.22	1.43031e-06	2062.22	0	3.96118e-06
58_ALLDRIVSV_2_run0	1/sp|Q92621|NU205_HUMAN	285392	4095.72	1.43506e-06	4095.72	0	3.96176e-06
289_FLNGLEIL_2_run0	1/sp|Q9NU22|MDN1_HUMAN	59338	5548.43	1.43808e-06	5548.43	0	3.97218e-06
1416_VLTGILEQV_2_run0	1/sp|Q96QK1|VPS35_HUMAN	17146	4508.58	1.44069e-06	4508.58	0	3.98987e-06
3915_VPRAILVDL_2_run0	1/sp|Q13885|TBB2A_HUMAN	458503	4122.54	1.44506e-06	4122.54	0	3.99059e-06
3817_TPRDLAVPAAL_2_run0	1/sp|Q8TEM1|PO210_HUMAN	147151	3372.02	1.45263e-06	3372.02	0	4.03476e-06
1625_APAGRKVGL_2_run0	1/sp|P62917|RL8_HUMAN	1120240	912.66	1.4558e-06	912.66	0	4.05401e-06
1029_QLVDIIEKV_2_run0	1/sp|P61289|PSME3_HUMAN	512584	4246.5	1.46408e-06	4246.5	0	4.05703e-06
900_LLLETLPEL_2_run0	1/sp|Q13488|VPP3_HUMAN	64706	5654.87	1.46532e-06	5654.87	0	4.0695e-06
725_KLLGELHTL_2_run0	1/sp|Q15154|PCM1_HUMAN	121633	2978.91	1.46945e-06	2978.91	0	4.07007e-06
680_KLIAQNLEL_2_run0	1/sp|P52732|KIF11_HUMAN	62351	3545.1	1.47597e-06	3545.1	0	4.07325e-06
3541_SPPSVQRAGL_2_run0	1/sp|Q9H6F5|CCD86_HUMAN	87381	1845.81	1.47735e-06	1845.81	0	4.10922e-06
1797_APNAGKSTL_2_run0	1/sp|O75616|ERAL1_HUMAN	193336	832.02	1.47916e-06	832.02	0	4.156e-06
1299_TLLGHEFVL_2_run0	1/sp|P30260|CDC27_HUMAN	215674	4507.86	1.48437e-06	4507.86	0	4.16311e-06
3148_RPRDKQMEL_2_run0	1/sp|Q9BUP3|HTAI2_HUMAN	66336	880.421	1.48785e-06	880.421	0	4.16332e-06
2802_QARKTASVL_2_run0	1/sp|O76021|RL1D1_HUMAN	50243	720.728	1.49136e-06	720.728	0	4.18654e-06
2471_KPRPPLHLL_2_run0	1/sp|Q8N4T4|ARG39_HUMAN	158632	2162.25	1.49258e-06	2162.25	0	4.25338e-06
2902_RPAPSPESI_2_run0	1/sp|Q8TDD1|DDX54_HUMAN	85012	1647.93	1.49541e-06	1647.93	0	4.30308e-06
2277_IPRQQNSSV_2_run0	1/sp|O60244|MED14_HUMAN	41536	798.562	1.499e-06	798.562	0	4.31173e-06
1146_RVPPVPPNV_2_run0	1/sp|Q9Y483|MTF2_HUMAN	74792	2413.81	1.50114e-06	2413.81	0	4.32302e-06
2682_LPSSSSSRGSL_2_run0	1/sp|P25054|APC_HUMAN	48757	1415.29	1.50426e-06	1415.29	0	4.35006e-06
2831_QPRLFTMDL_2_run0	1/sp|Q9Y4A5|TRRAP_HUMAN	40527	4467.19	1.50677e-06	4467.19	0	4.35186e-06
733_KLLQFYPSL_2_run0	1/sp|Q9GZY6|NTAL_HUMAN	184652	4573.56	1.51264e-06	4573.56	0	4.35887e-06
3589_SPRGGTPGSGAA_2_run0	1/sp|O14497|ARI1A_HUMAN	79481	470.819	1.51625e-06	470.819	0	4.36184e-06
1751_APINKAGSFL_2_run0	1/sp|P51451|BLK_HUMAN	65299	2890.99	1.52093e-06	2890.99	0	4.36569e-06
2395_KPKKGGGISF_2_run0	1/sp|P55039|DRG2_HUMAN	82417	918.382	1.52848e-06	918.382	0	4.39581e-06
1531_YLLPYENLL_2_run0	1/sp|Q12769|NU160_HUMAN	70885	5818.57	1.53284e-06	5818.57	0	4.4177e-06
3653_SPRTESQSL_2_run0	1/sp|Q9C0A6|SETD5_HUMAN	95010	898.798	1.53519e-06	898.798	0	4.41987e-06
2425_KPNANRIAL_2_run0	1/sp|P17931|LEG3_HUMAN	147690	1481.73	1.53807e-06	1481.73	0	4.43455e-06
932_LLVPTSGIYFV_2_run0	1/sp|P01374|TNFB_HUMAN	36546	5749.59	1.5453e-06	5749.59	0	4.43665e-06
2502_KPSLPFTSL_2_run0	1/sp|P31785|IL2RG_HUMAN	1534160	4045.11	1.54672e-06	4045.11	0	4.43722e-06
1113_RLSDAQIYV_2_run0	1/sp|O14879|IFIT3_HUMAN	495870	2830.15	1.55019e-06	2830.15	0	4.44496e-06
1933_APRTVLLLLSAA_2_run0	1/sp|P01889|1B07_HUMAN	30882	5113.74	1.55351e-06	5113.74	0	4.44789e-06
1813_APQGSRAAP_2_run0	1/sp|Q9BRP8|WIBG_HUMAN	115151	487.988	1.55702e-06	487.988	0	4.46289e-06
1774_APKSSKTEL_2_run0	1/sp|Q8N3A8|PARP8_HUMAN	103378	466.358	1.55879e-06	466.358	0	4.50074e-06
826_KMWEEAISL_2_run0	1/sp|Q92608|DOCK2_HUMAN	196798	4127.19	1.56097e-06	4127.19	0	4.54385e-06
39_ALFPAPLAQI_2_run0	1/sp|Q8ND24|RN214_HUMAN	33207	5538.19	1.56842e-06	5538.19	0	4.5461e-06
1863_APRKKSPDL_2_run0	1/sp|Q9BT25|HAUS8_HUMAN	56469	421.285	1.57367e-06	421.285	0	4.58759e-06
2285_IPRVTTPLSSL_2_run0	1/sp|Q7Z7L9|ZSCA2_HUMAN	47695	3986.96	1.57477e-06	3986.96	0	4.61284e-06
1271_TIIDLPGITRV_2_run0	2/sp|P20591|MX1_HUMAN/sp|P20592|MX2_HUMAN	162752	4773.94	1.57554e-06	4773.94	0	4.61863e-06
1456_WLAEKLPTL_2_run0	1/sp|Q14008|CKAP5_HUMAN	228767	4444.51	1.57924e-06	4444.51	0	4.62944e-06
2293_IPTLKISL_2_run0	1/sp|Q6P2Q9|PRP8_HUMAN	32493	4383.77	1.58463e-06	4383.77	0	4.70763e-06
1214_SLLENIAKA_2_run0	1/sp|Q93074|MED12_HUMAN	91011	3348.12	1.58989e-06	3348.12	0	4.72188e-06
3034_RPKKPGQSF_2_run0	1/sp|O15042|SR140_HUMAN	336691	459.983	1.5968e-06	459.983	0	4.72854e-06
3847_TPSGDKTSL_2_run0	1/sp|P08133|ANXA6_HUMAN	102255	889.797	1.60024e-06	889.797	0	4.75235e-06
1819_APQWPIIAF_2_run0	1/sp|Q96HH6|TMM19_HUMAN	56773	5971.76	1.60717e-06	5971.76	0	4.76399e-06
2068_FPMGDRLYI_2_run0	1/sp|P49720|PSB3_HUMAN	105794	4278.48	1.60717e-06	4278.48	0	4.80963e-06
1144_RVLDPSMVILEV_2_run0	1/sp|Q9UJX6|ANC2_HUMAN	75069	5109.22	1.61097e-06	5109.22	0	4.85969e-06
3868_TVRAVIATL_2_run0	1/sp|Q8N201|INT1_HUMAN	160119	3272.16	1.61494e-06	3272.16	0	4.87738e-06
2286_IPRVVQEGDVL_2_run0	1/sp|Q13608|PEX6_HUMAN	127543	3310.77	1.61526e-06	3310.77	0	4.897e-06
268_FLLKLTPLL_2_run0	1/sp|O75448|MED24_HUMAN	19638	5770.63	1.62082e-06	5770.63	0	4.91493e-06
2193_HPRDFFSRL_2_run0	1/sp|Q03989|ARI5A_HUMAN	111429	2728.77	1.6274e-06	2728.77	0	4.94763e-06
839_KVIEINPYL_2_run0	1/sp|P28074|PSB5_HUMAN	1285360	3730.93	1.62977e-06	3730.93	0	4.95315e-06
1897_APRPPQDLIGL_2_run0	1/sp|Q92797|SYMPK_HUMAN	200081	3793.02	1.63194e-06	3793.02	0	4.95423e-06
2737_MPRKITEVL_2_run0	1/sp|Q9BX10|GTPB2_HUMAN	156043	2685.29	1.63378e-06	2685.29	0	4.96532e-06
2805_QPAAKRQKL_2_run0	1/sp|O94776|MTA2_HUMAN	72887	341.779	1.635e-06	341.779	0	4.97144e-06
1484_YLDASLITV_2_run0	1/sp|Q14562|DHX8_HUMAN	41095	4589.47	1.64105e-06	4589.47	0	4.97193e-06
3619_SPRLTLLSL_2_run0	1/sp|Q03519|TAP2_HUMAN	96262	4605.2	1.64482e-06	4605.2	0	4.98337e-06
3490_SPLGHRMQL_2_run0	1/sp|Q8WUA4|TF3C2_HUMAN	203296	2056.22	1.65645e-06	2056.22	0	4.99336e-06
3370_SPALLPPL_2_run0	1/sp|Q9BRQ3|NUD22_HUMAN	198540	4622.37	1.66288e-06	4622.37	0	4.99716e-06
302_FLQEGDLISA_2_run0	1/sp|Q13868|EXOS2_HUMAN	83959	3976.9	1.66968e-06	3976.9	0	5.022e-06
362_FVILRKNPNYDL_2_run0	1/sp|Q13200|PSMD2_HUMAN	18505	3325.63	1.67308e-06	3325.63	0	5.12363e-06
688_KLIDLSQVMYL_2_run0	1/sp|Q6ZN28|MACC1_HUMAN	30041	5478.13	1.67745e-06	5478.13	0	5.12884e-06
2573_LPDLQRSKQAL_2_run0	1/sp|Q9UL45|BL1S6_HUMAN	90090	2377.55	1.67902e-06	2377.55	0	5.13362e-06
739_KLMDHIYAV_2_run0	1/sp|Q9UP83|COG5_HUMAN	172869	2887.41	1.68589e-06	2887.41	0	5.13443e-06
1514_YLIPDIDLKL_2_run0	1/sp|Q92922|SMRC1_HUMAN	56295	5518.28	1.68673e-06	5518.28	0	5.13986e-06
2896_RPAPLSAEL_2_run0	1/sp|P53602|MVD1_HUMAN	886751	2585.77	1.69034e-06	2585.77	0	5.15829e-06
320_FLVEHNLVL_2_run0	1/sp|Q9Y4C1|KDM3A_HUMAN	99261	4215.58	1.69132e-06	4215.58	0	5.16153e-06
468_GLVGSLQEV_2_run0	1/sp|Q9H1A4|APC1_HUMAN	32492	3604.7	1.69374e-06	3604.7	0	5.16598e-06
148_AQYEHDLEVA_2_run0	1/sp|P62826|RAN_HUMAN	25272	2252.59	1.69374e-06	2252.59	0	5.1714e-06
441_GLMDDVDFKA_2_run0	1/sp|Q9Y4L1|HYOU1_HUMAN	44012	3841.13	1.69743e-06	3841.13	0	5.19838e-06
2246_IPKPLNPAL_2_run0	1/sp|P62952|BLCAP_HUMAN	187942	2922.05	1.70213e-06	2922.05	0	5.20136e-06
2665_LPSASHFSQL_2_run0	1/sp|Q9Y520|PRC2C_HUMAN	79709	2984.03	1.7032e-06	2984.03	0	5.25042e-06
1462_YAYDGKDYIA_2_run0	1/sp|P30447|1A23_HUMAN	47197	2597.13	1.70575e-06	2597.13	0	5.27936e-06
1280_TLFDYEVRL_2_run0	1/sp|Q96T88|UHRF1_HUMAN	359567	4662.1	1.71023e-06	4662.1	0	5.3006e-06
931_LLSPVVPQI_2_run0	1/sp|Q8N1F7|NUP93_HUMAN	484148	4642.79	1.71126e-06	4642.79	0	5.31304e-06
2722_MPLPGTKAL_2_run0	1/sp|Q9UMZ2|SYNRG_HUMAN	235128	2900.05	1.713e-06	2900.05	0	5.31414e-06
22_ALAQRLLEV_2_run0	1/sp|Q6ZMZ3|SYNE3_HUMAN	180851	3619.16	1.72293e-06	3619.16	0	5.31778e-06
720_KLLEPVLLL_2_run0	1/sp|P62249|RS16_HUMAN	88018	5256.32	1.7274e-06	5256.32	0	5.31903e-06
1479_YLAELVTPIL_2_run0	1/sp|Q04637|IF4G1_HUMAN	37776	5676.17	1.72948e-06	5676.17	0	5.33969e-06
2587_LPHNRLVSL_2_run0	1/sp|Q96CX6|LRC58_HUMAN	171637	2561.15	1.73416e-06	2561.15	0	5.34995e-06
3117_RPQDKFLVL_2_run0	1/sp|Q9P0J1|PDP1_HUMAN	122668	3272.52	1.73957e-06	3272.52	0	5.41294e-06
1546_YLPYPIHQV_2_run0	1/sp|P49760|CLK2_HUMAN	146659	3435.07	1.74542e-06	3435.07	0	5.42401e-06
57_ALLDKLYAL_2_run0	1/sp|Q9NV31|IMP3_HUMAN	1263030	4740.03	1.74678e-06	4740.03	0	5.4633e-06
1442_VMFRTPLASV_2_run0	1/sp|Q9UKT4|FBX5_HUMAN	42899	4067.91	1.74777e-06	4067.91	0	5.4858e-06
3315_RVKAPNKSL_2_run0	1/sp|O43290|SNUT1_HUMAN	35755	547.898	1.74874e-06	547.898	0	5.49404e-06
2154_GPRSADEADEL_2_run0	1/sp|Q8TBE0|BAHD1_HUMAN	26195	1479.51	1.75345e-06	1479.51	0	5.50176e-06
2961_RPFPGLVI_2_run0	1/sp|P78347|GTF2I_HUMAN	310629	4243.31	1.7552e-06	4243.31	0	5.50432e-06
925_LLPPPPCPA_2_run0	1/sp|Q9BTY2|FUCO2_HUMAN	311690	3277.84	1.76063e-06	3277.84	0	5.52935e-06
1503_YLGNINPQM_2_run0	1/sp|O15042|SR140_HUMAN	244946	3366.09	1.7655e-06	3366.09	0	5.53597e-06
110_ALSSVIKEL_2_run0	1/sp|Q08AG7|MZT1_HUMAN	50793	3741.97	1.76824e-06	3741.97	0	5.54004e-06
2212_HPVQPWASL_2_run0	1/sp|Q8NDX1|PSD4_HUMAN	111839	3530.23	1.76974e-06	3530.23	0	5.5488e-06
159_AVTGILVQL_2_run0	1/sp|Q5XPI4|RN123_HUMAN	156866	5772.93	1.77433e-06	5772.93	0	5.56277e-06
DECOY_99_ALRDVSEEL_2_run0	DECOY_1/sp|P40222|TXLNA_HUMAN	285612	2577.82	1.77433e-06	2577.82	0	5.56068e-06
3800_TPLSSTVTL_2_run0	1/sp|P12004|PCNA_HUMAN	158007	3460.08	1.78155e-06	3460.08	0	5.59686e-06
2622_LPQLTGPVL_2_run0	1/sp|P41229|KDM5C_HUMAN	117733	4502.01	1.78234e-06	4502.01	0	5.60037e-06
26_ALDKATVLL_2_run0	1/sp|Q53EL6|PDCD4_HUMAN	221296	3224.12	1.78685e-06	3224.12	0	5.63224e-06
1826_APRALLQDVL_2_run0	1/sp|Q8NCH0|CHSTE_HUMAN	66400	4150.26	1.78905e-06	4150.26	0	5.67706e-06
2718_MPKKSSVVL_2_run0	1/sp|Q9UIQ6|LCAP_HUMAN	93508	1488.18	1.79485e-06	1488.18	0	5.70956e-06
878_LLDVPTAAV_2_run0	1/sp|P13284|GILT_HUMAN	238832	3862.99	1.80035e-06	3862.99	0	5.73008e-06
3340_SINAQRNAL_2_run0	1/sp|Q14669|TRIPC_HUMAN	1083120	1422.57	1.80475e-06	1422.57	0	5.73843e-06
3881_VPATDRNAL_2_run0	1/sp|P60228|EIF3E_HUMAN	2707450	1404.04	1.80984e-06	1404.04	0	5.77799e-06
1934_APRTVLLLLSG_2_run0	1/sp|P30464|1B15_HUMAN	19539	5156.65	1.81456e-06	5156.65	0	5.80532e-06
1968_APSPLRLMDL_2_run0	1/sp|Q8IZ52|CHSS2_HUMAN	47874	4670.58	1.81718e-06	4670.58	0	5.83899e-06
2066_FPMEIRQYL_2_run0	1/sp|P42224|STAT1_HUMAN	71626	4588.56	1.82429e-06	4588.56	0	5.8517e-06
644_KLADISINYV_2_run0	1/sp|O94822|LTN1_HUMAN	51488	3796.01	1.82942e-06	3796.01	0	5.87306e-06
1318_TLVDEVFRI_2_run0	1/sp|P15927|RFA2_HUMAN	57042	5040.15	1.83368e-06	5040.15	0	5.8804e-06
3537_SPNSKVNTL_2_run0	1/sp|P40939|ECHA_HUMAN	197106	1088.52	1.83669e-06	1088.52	0	5.89274e-06
2994_RPHYGSVL_2_run0	1/sp|P46940|IQGA1_HUMAN	140680	1571.8	1.83922e-06	1571.8	0	5.90617e-06
3042_RPKNLMQTL_2_run0	1/sp|Q9Y2D5|AKAP2_HUMAN	164325	2197.06	1.84257e-06	2197.06	0	5.91216e-06
2102_GPAPKGSSL_2_run0	1/sp|P35408|PE2R4_HUMAN	107187	904.543	1.84802e-06	904.543	0	5.91351e-06
1145_RVMPSSFFL_2_run0	1/sp|O75663|TIPRL_HUMAN	67800	4518.49	1.85071e-06	4518.49	0	5.91707e-06
951_LMVDHVTEV_2_run0	1/sp|Q9HD15|SRA1_HUMAN	152488	2747.6	1.85642e-06	2747.6	0	5.92994e-06
3269_RPTSKRDSL_2_run0	1/sp|P35251|RFC1_HUMAN	76405	367.869	1.85753e-06	367.869	0	5.95515e-06
3078_RPMDKTVVF_2_run0	1/sp|Q8NG31|CASC5_HUMAN	88181	2260.75	1.85913e-06	2260.75	0	5.97424e-06
1759_APKDSSSDL_2_run0	1/sp|Q6IQ32|ADNP2_HUMAN	47935	693.541	1.86867e-06	693.541	0	6.01317e-06
1741_APIAKVGVL_2_run0	1/sp|Q9UHB6|LIMA1_HUMAN	657166	2863.56	1.87267e-06	2863.56	0	6.02145e-06
1873_APRLGISL_2_run0	1/sp|Q7Z7A3|CTU1_HUMAN	585760	3437.94	1.87488e-06	3437.94	0	6.03732e-06
1669_APARAILSL_2_run0	1/sp|Q9UGH3|S23A2_HUMAN	178940	3338.75	1.87974e-06	3338.75	0	6.08524e-06
2753_NAAERRGPL_2_run0	1/sp|P01903|DRA_HUMAN	199543	759.895	1.88233e-06	759.895	0	6.08705e-06
3505_SPMAERSMM(UniMod:35)_2_run0	1/sp|P18583|SON_HUMAN	93465	1157.74	1.88923e-06	1157.74	0	6.13933e-06
264_FLLEPGNLEV_2_run0	1/sp|Q6ZNJ1|NBEL2_HUMAN	31876	5241.77	1.89549e-06	5241.77	0	6.16198e-06
1072_RLINQVLEL_2_run0	1/sp|Q9UIL1|SCOC_HUMAN	32240	4245.74	1.90213e-06	4245.74	0	6.18754e-06
2417_KPMEKLLGL_2_run0	1/sp|Q9Y3D3|RT16_HUMAN	152228	3171.1	1.90279e-06	3171.1	0	6.20615e-06
695_KLIKSLEAA_2_run0	1/sp|P62495|ERF1_HUMAN	32448	1647.99	1.92307e-06	1647.99	0	6.20926e-06
3638_SPRPVALAL_2_run0	1/sp|Q8N201|INT1_HUMAN	168881	3140.76	1.93118e-06	3140.76	0	6.21901e-06
1439_VMDSKIVQV_2_run0	1/sp|O15131|IMA6_HUMAN	466158	2581.22	1.93238e-06	2581.22	0	6.22059e-06
977_MLPPPPLTA_2_run0	1/sp|P18858|DNLI1_HUMAN	291194	3639.25	1.9357e-06	3639.25	0	6.25138e-06
92_ALPPVLTTV_2_run0	1/sp|Q6PKG0|LARP1_HUMAN	347645	4400.42	1.94539e-06	4400.42	0	6.2826e-06
1334_TVGGTAYAIYEL_2_run0	1/sp|P14406|CX7A2_HUMAN	48391	4578.71	1.9481e-06	4578.71	0	6.30229e-06
3805_TPMPKDVRQSL_3_run0	1/sp|Q9NSV4|DIAP3_HUMAN	47483	2166.04	1.95224e-06	2166.04	0	6.34773e-06
1698_APDSQRLKLL_2_run0	1/sp|Q9UQE7|SMC3_HUMAN	39619	2560.59	1.95352e-06	2560.59	0	6.34849e-06
2527_KPVSSNNSL_2_run0	1/sp|O60318|GANP_HUMAN	176020	769.35	1.96241e-06	769.35	0	6.35969e-06
3391_SPASRSISL_2_run0	1/sp|P32970|CD70_HUMAN	1287790	2028.71	1.9625e-06	2028.71	0	6.37205e-06
1981_APSQQRQQIA_2_run0	1/sp|Q6P2Q9|PRP8_HUMAN	49425	707.672	1.9752e-06	707.672	0	6.38042e-06
3233_RPSGPSKAL_2_run0	1/sp|P48444|COPD_HUMAN	955033	725.757	1.99269e-06	725.757	0	6.38416e-06
3694_SPSPAKSTL_2_run0	1/sp|P42345|MTOR_HUMAN	81989	1028.4	1.99448e-06	1028.4	0	6.41032e-06
2838_QPTGGKARL_2_run0	2/sp|P42677|RS27_HUMAN/sp|Q71UM5|RS27L_HUMAN	58397	529.388	2.0035e-06	529.388	0	6.48044e-06
1794_APMIKKIAF_2_run0	1/sp|Q5UIP0|RIF1_HUMAN	99704	2928.88	2.01216e-06	2928.88	0	6.4841e-06
2579_LPFLRITSL_2_run0	1/sp|Q6ZT12|UBR3_HUMAN	86610	5107.87	2.01543e-06	5107.87	0	6.50552e-06
122_ALVSSLHLL_2_run0	1/sp|Q9Y678|COPG1_HUMAN	83263	4390.7	2.01852e-06	4390.7	0	6.51187e-06
389_GLAQVITAV_2_run0	1/sp|Q9UKY1|ZHX1_HUMAN	29086	4344.48	2.02084e-06	4344.48	0	6.53311e-06
1190_SLIAKVATA_2_run0	1/sp|Q92526|TCPW_HUMAN	84859	2328.4	2.03184e-06	2328.4	0	6.54573e-06
1417_VLTGLSIRL_2_run0	1/sp|Q6SPF0|SAMD1_HUMAN	54028	4391.73	2.03726e-06	4391.73	0	6.55455e-06
3695_SPSPGLFRASL_2_run0	1/sp|Q9HAW4|CLSPN_HUMAN	29978	3613.7	2.03925e-06	3613.7	0	6.56989e-06
2791_NPRSVTLLI_2_run0	1/sp|P40227|TCPZ_HUMAN	1635760	3642.12	2.04165e-06	3642.12	0	6.58062e-06
3755_TAAPPAQPL_2_run0	1/sp|P25440|BRD2_HUMAN	471947	2036.75	2.04251e-06	2036.75	0	6.64732e-06
313_FLSTINVGL_2_run0	1/sp|P39687|AN32A_HUMAN	38039	4748.68	2.04323e-06	4748.68	0	6.65865e-06
742_KLMDQLEAL_2_run0	1/sp|Q9NP79|VTA1_HUMAN	127919	3886.18	2.04919e-06	3886.18	0	6.66846e-06
3073_RPLRSTGVAL_2_run0	1/sp|Q15437|SC23B_HUMAN	219426	1738.71	2.06346e-06	1738.71	0	6.69903e-06
2833_QPRPQSTSL_2_run0	1/sp|Q96EP0|RNF31_HUMAN	51802	1225.35	2.06921e-06	1225.35	0	6.71321e-06
1129_RLYDGLFKV_2_run0	1/sp|Q16531|DDB1_HUMAN	107173	3697.92	2.07841e-06	3697.92	0	6.73399e-06
1477_YLADVTNAL_2_run0	1/sp|Q5T4S7|UBR4_HUMAN	109038	3762.16	2.08163e-06	3762.16	0	6.74181e-06
2325_KPAGPPGIL_2_run0	1/sp|P35579|MYH9_HUMAN	358010	2357.73	2.0848e-06	2357.73	0	6.74598e-06
1486_YLDNGVVFV_2_run0	1/sp|Q16531|DDB1_HUMAN	263814	4404.78	2.08962e-06	4404.78	0	6.74986e-06
3271_RPVASSSTATL_2_run0	1/sp|Q9H422|HIPK3_HUMAN	48608	1450.38	2.09668e-06	1450.38	0	6.75046e-06
1014_QLIDKVWQL_2_run0	1/sp|Q92503|S14L1_HUMAN	173891	4571.06	2.10127e-06	4571.06	0	6.7608e-06
1641_APAPAAHVA_2_run0	1/sp|P16989|YBOX3_HUMAN	292791	895.098	2.10903e-06	895.098	0	6.81682e-06
3445_SPGQRAVL_2_run0	1/sp|Q12772|SRBP2_HUMAN	66972	1265.2	2.10903e-06	1265.2	0	6.81299e-06
3811_TPNEERNVM(UniMod:35)_2_run0	1/sp|P35606|COPB2_HUMAN	28452	639.212	2.1212e-06	639.212	0	6.84309e-06
638_KIWDVSVNSV_2_run0	1/sp|O75083|WDR1_HUMAN	47495	3618.14	2.12283e-06	3618.14	0	6.87898e-06
279_FLLPTGVYL_2_run0	1/sp|O00329|PK3CD_HUMAN	87715	5899.84	2.12645e-06	5899.84	0	6.88132e-06
3335_SARAIMAQL_2_run0	2/sp|P26232|CTNA2_HUMAN/sp|P35221|CTNA1_HUMAN	120461	2903.68	2.1283e-06	2903.68	0	6.88855e-06
130_ALYDNVEKL_2_run0	1/sp|P08243|ASNS_HUMAN	74309	3168.07	2.13571e-06	3168.07	0	6.8974e-06
3368_SPALKRLDL_2_run0	1/sp|Q8WTW3|COG1_HUMAN	196368	2539.01	2.13955e-06	2539.01	0	6.91162e-06
1529_YLLPSVVLL_2_run0	1/sp|Q9NUQ2|PLCE_HUMAN	237417	6217.97	2.14195e-06	6217.97	0	6.9191e-06
3643_SPRQPSGGQI_2_run0	1/sp|O14497|ARI1A_HUMAN	45443	1038.12	2.14433e-06	1038.12	0	6.94858e-06
3614_SPRLPVGGFRSL_2_run0	1/sp|Q14669|TRIPC_HUMAN	271538	3435.32	2.15414e-06	3435.32	0	6.97879e-06
1543_YLPAVFEEV_2_run0	1/sp|Q14764|MVP_HUMAN	21780	5019.61	2.16163e-06	5019.61	0	6.98609e-06
2206_HPRSPTPTL_2_run0	1/sp|Q96HE9|PRR11_HUMAN	289453	1351.95	2.17102e-06	1351.95	0	6.99632e-06
1957_APSKSESAL_2_run0	1/sp|Q9GZR7|DDX24_HUMAN	71402	782.544	2.17455e-06	782.544	0	7.07305e-06
1003_NMVAKVDEV_2_run0	1/sp|P62906|RL10A_HUMAN	317713	2137.23	2.18234e-06	2137.23	0	7.09487e-06
2617_LPPTALVGL_2_run0	1/sp|Q15436|SC23A_HUMAN	152186	4564.23	2.18678e-06	4564.23	0	7.11658e-06
2167_HAAAYRNAL_2_run0	1/sp|P22695|QCR2_HUMAN	143648	1074.11	2.18995e-06	1074.11	0	7.19763e-06
817_KMDDPDYWRTV_2_run0	1/sp|Q14137|BOP1_HUMAN	40126	3040.6	2.19099e-06	3040.6	0	7.22817e-06
2000_APTPARPVL_2_run0	1/sp|Q9HAB3|S52A2_HUMAN	488154	2073.38	2.198e-06	2073.38	0	7.29548e-06
241_FLIGPKLYEA_2_run0	1/sp|P19447|ERCC3_HUMAN	32343	4181.42	2.20308e-06	4181.42	0	7.29815e-06
179_FILPSSLYL_2_run0	1/sp|Q9H2H9|S38A1_HUMAN	24426	5952.94	2.20707e-06	5952.94	0	7.29968e-06
2646_LPRLGLLAL_2_run0	1/sp|Q8WUA4|TF3C2_HUMAN	64790	5311.94	2.21387e-06	5311.94	0	7.37759e-06
507_HLGDFLVFL_2_run0	1/sp|Q15751|HERC1_HUMAN	35387	6155.93	2.21791e-06	6155.93	0	7.38779e-06
254_FLLDGFPRTV_2_run0	1/sp|P54819|KAD2_HUMAN	276042	4819.36	2.22371e-06	4819.36	0	7.40951e-06
83_ALMPVLNQV_2_run0	1/sp|Q5RKV6|EXOS6_HUMAN	544585	4484.65	2.23039e-06	4484.65	0	7.41271e-06
3668_SPSDRPLSL_2_run0	1/sp|Q12769|NU160_HUMAN	785388	2357.28	2.23305e-06	2357.28	0	7.45723e-06
2469_KPRPIIPML_2_run0	1/sp|O94953|KDM4B_HUMAN	451535	3544.18	2.23364e-06	3544.18	0	7.47014e-06
2905_RPAQFLPEM_2_run0	1/sp|Q15345|LRC41_HUMAN	332846	3548.9	2.23454e-06	3548.9	0	7.49774e-06
3757_TPAEARTTTL_2_run0	1/sp|P98198|AT8B2_HUMAN	57323	1435.77	2.24147e-06	1435.77	0	7.56429e-06
3889_VPESHRKPL_2_run0	1/sp|Q01850|CDR2_HUMAN	21829	526.001	2.24765e-06	526.001	0	7.57401e-06
3433_SPGERATL_2_run0	1/sp|P01621|KV303_HUMAN	858307	1040.54	2.2523e-06	1040.54	0	7.585e-06
1092_RLLPVIFLV_2_run0	1/sp|Q6P4A7|SFXN4_HUMAN	16917	6117.08	2.25298e-06	6117.08	0	7.59205e-06
3396_SPAVSRTQL_2_run0	1/sp|Q15149|PLEC_HUMAN	143763	1542.13	2.25523e-06	1542.13	0	7.60471e-06
3579_SPREAARVL_2_run0	1/sp|Q2T9J0|TYSD1_HUMAN	54404	1243.35	2.25995e-06	1243.35	0	7.61436e-06
1584_YMNHIMVSV_2_run0	1/sp|P41212|ETV6_HUMAN	53568	3325.76	2.26264e-06	3325.76	0	7.68676e-06
1057_RLFNDPVAMV_2_run0	1/sp|Q92685|ALG3_HUMAN	40448	4070.78	2.26571e-06	4070.78	0	7.69128e-06
370_GIFGGHIRSV_2_run0	1/sp|Q14694|UBP10_HUMAN	220469	2573.92	2.26636e-06	2573.92	0	7.7009e-06
1402_VLMLQEPLL_2_run0	1/sp|P04843|RPN1_HUMAN	32866	5367.52	2.27162e-06	5367.52	0	7.73262e-06
1994_APTKRKSL_2_run0	1/sp|P46013|KI67_HUMAN	86954	279.867	2.27604e-06	279.867	0	7.74986e-06
114_ALTSVVVTL_2_run0	1/sp|Q00534|CDK6_HUMAN	47417	4453.63	2.28553e-06	4453.63	0	7.75597e-06
3878_VPASKRPPL_2_run0	1/sp|O60682|MUSC_HUMAN	298111	1195.19	2.28929e-06	1195.19	0	7.7597e-06
3659_SPRVPASET_2_run0	1/sp|Q9HD15|SRA1_HUMAN	138991	979.082	2.29434e-06	979.082	0	7.79033e-06
503_HLAELIAEL_2_run0	1/sp|Q96F44|TRI11_HUMAN	15064	4608.19	2.29848e-06	4608.19	0	7.79583e-06
3311_RVAEHHVATL_2_run0	1/sp|Q12834|CDC20_HUMAN	540702	861.825	2.30207e-06	861.825	0	7.80464e-06
3563_SPQQVMGSL_2_run0	1/sp|Q9H6Q4|NARFL_HUMAN	72164	3096.08	2.30615e-06	3096.08	0	7.82478e-06
1554_YLSDNVHLV_2_run0	1/sp|Q16543|CDC37_HUMAN	133424	3153.26	2.31587e-06	3153.26	0	7.85679e-06
3352_SPAGLKAVL_2_run0	1/sp|Q6P9B9|INT5_HUMAN	155435	2842.23	2.31911e-06	2842.23	0	7.88024e-06
3844_TPSELRSSTGIL_2_run0	1/sp|O60462|NRP2_HUMAN	36594	2898.99	2.33708e-06	2898.99	0	7.8818e-06
1041_RIPAYFVTV_2_run0	1/sp|P26640|SYVC_HUMAN	80472	4062.22	2.34889e-06	4062.22	0	7.90019e-06
2884_RPALPVLGF_2_run0	1/sp|Q6DN14|MCTP1_HUMAN	27932	4594.28	2.35183e-06	4594.28	0	7.92743e-06
3763_TPAHVRKQL_2_run0	1/sp|P78345|RPP38_HUMAN	16217	515.503	2.35551e-06	515.503	0	7.96933e-06
3949_VPSKPPMSL_2_run0	1/sp|Q6AI12|ANR40_HUMAN	1131710	2611.06	2.36139e-06	2611.06	0	8.0241e-06
508_HLINYIIFL_2_run0	1/sp|Q5BJD5|TM41B_HUMAN	58234	5950.61	2.36963e-06	5950.61	0	8.04721e-06
2015_APVPPPTSL_2_run0	1/sp|Q9NTJ4|MA2C1_HUMAN	384123	2861.03	2.38182e-06	2861.03	0	8.09726e-06
2426_KPNANRIALDF_2_run0	1/sp|P17931|LEG3_HUMAN	24449	3023.25	2.39117e-06	3023.25	0	8.15814e-06
340_FLYSDEVQI_2_run0	1/sp|Q9H0C5|BTBD1_HUMAN	100032	4339.86	2.40208e-06	4339.86	0	8.16064e-06
1235_SLMGPVVHEV_2_run0	1/sp|O95613|PCNT_HUMAN	76793	3139.52	2.40917e-06	3139.52	0	8.17119e-06
2156_GPRSSLRVL_2_run0	1/sp|Q15393|SF3B3_HUMAN	509023	1797.13	2.41202e-06	1797.13	0	8.18004e-06
223_FLFDHLLT_2_run0	1/sp|Q7L2H7|EIF3M_HUMAN	27829	5088.44	2.41863e-06	5088.44	0	8.18506e-06
2412_KPLGIKTAL_2_run0	1/sp|Q63HN8|RN213_HUMAN	76013	2122.31	2.42418e-06	2122.31	0	8.19526e-06
816_KMAEMLVEL_2_run0	1/sp|Q9Y605|MOFA1_HUMAN	102403	4186.13	2.42879e-06	4186.13	0	8.20207e-06
3087_RPNDSRMLVAL_2_run0	1/sp|Q9UJX2|CDC23_HUMAN	61859	2977.65	2.43282e-06	2977.65	0	8.21462e-06
2556_LPALFGATL_2_run0	1/sp|Q9H6Y7|RN167_HUMAN	28405	5428.41	2.44052e-06	5428.41	0	8.219e-06
3588_SPRGFPLGL_2_run0	1/sp|Q9P270|SLAI2_HUMAN	214697	4008.52	2.44282e-06	4008.52	0	8.2385e-06
1167_SLADVHIEV_2_run0	1/sp|O14981|BTAF1_HUMAN	71058	3656.51	2.4546e-06	3656.51	0	8.27931e-06
1627_APAGTRSQV_2_run0	1/sp|Q13428|TCOF_HUMAN	464304	530.274	2.45852e-06	530.274	0	8.32808e-06
364_FVLPELPSV_2_run0	1/sp|P53990|IST1_HUMAN	264007	5582.22	2.46861e-06	5582.22	0	8.4155e-06
1289_TLIEDILGV_2_run0	1/sp|Q8TEL6|TP4AP_HUMAN	196343	6091.78	2.47717e-06	6091.78	0	8.51865e-06
3997_YPRSGTGQTI_2_run0	1/sp|Q8TBM8|DJB14_HUMAN	70058	1412.3	2.47997e-06	1412.3	0	8.52499e-06
3924_VPRLPATAA_2_run0	1/sp|Q01581|HMCS1_HUMAN	61355	2119.83	2.48635e-06	2119.83	0	8.52618e-06
986_NLAENISRV_2_run0	3/sp|P11217|PYGM_HUMAN/sp|P06737|PYGL_HUMAN/sp|P11216|PYGB_HUMAN	265339	2619.95	2.49212e-06	2619.95	0	8.54352e-06
2438_KPQGQRTSL_2_run0	1/sp|Q92547|TOPB1_HUMAN	152036	500.893	2.49869e-06	500.893	0	8.54773e-06
2619_LPQGIVREL_2_run0	1/sp|P63272|SPT4H_HUMAN	231006	3422.33	2.50497e-06	3422.33	0	8.63991e-06
2693_LPYKAGLSL_2_run0	1/sp|Q96P48|ARAP1_HUMAN	112941	3349.63	2.51167e-06	3349.63	0	8.65745e-06
3023_RPKEGTSTL_2_run0	1/sp|Q9Y5W9|SNX11_HUMAN	284569	540.178	2.5183e-06	540.178	0	8.66832e-06
185_FIWENIHTL_2_run0	1/sp|Q03001|DYST_HUMAN	109357	4746.3	2.52115e-06	4746.3	0	8.69812e-06
2181_HPISNNNSL_2_run0	1/sp|Q8NFD5|ARI1B_HUMAN	121391	1050.52	2.52821e-06	1050.52	0	8.76252e-06
626_KIIEYSVYL_2_run0	1/sp|P51610|HCFC1_HUMAN	67124	4041.85	2.53248e-06	4041.85	0	8.76807e-06
2664_LPSARPEL_2_run0	1/sp|Q9NR09|BIRC6_HUMAN	139054	2282.01	2.53453e-06	2282.01	0	8.81214e-06
2491_KPRVNPVTSL_2_run0	1/sp|Q14432|PDE3A_HUMAN	33415	1869.99	2.53877e-06	1869.99	0	8.84929e-06
3657_SPRTPVSPVKF_3_run0	1/sp|P23443|KS6B1_HUMAN	143893	2561.36	2.54739e-06	2561.36	0	8.90821e-06
1284_TLGNVLVTV_2_run0	1/sp|Q9NV70|EXOC1_HUMAN	55985	4204.98	2.54951e-06	4204.98	0	8.92209e-06
1729_APGRHSSSL_2_run0	1/sp|Q6ZNJ1|NBEL2_HUMAN	30790	434.455	2.56202e-06	434.455	0	8.94121e-06
2024_APWQVVPEL_2_run0	1/sp|Q8IU68|TMC8_HUMAN	153152	5074.12	2.56787e-06	5074.12	0	8.94949e-06
2797_NVRPPNTAL_2_run0	1/sp|Q17RS7|GEN_HUMAN	973844	1935.95	2.573e-06	1935.95	0	8.95842e-06
2721_MPKPPNLIM_2_run0	1/sp|P46100|ATRX_HUMAN	204197	3683.03	2.58142e-06	3683.03	0	9.02845e-06
1141_RMWEDPMGA_2_run0	1/sp|Q9ULX6|AKP8L_HUMAN	95677	3072	2.5846e-06	3072	0	9.04469e-06
1470_YIFEEPFTI_2_run0	1/sp|P08237|PFKAM_HUMAN	28529	5706.82	2.58708e-06	5706.82	0	9.06389e-06
80_ALMDQVHHM_2_run0	1/sp|Q96BU1|S1PBP_HUMAN	43704	2134.45	2.59106e-06	2134.45	0	9.11128e-06
3440_SPGPEKMAL_2_run0	1/sp|O75995|SASH3_HUMAN	368163	2149.16	2.59574e-06	2149.16	0	9.13412e-06
2894_RPAPLPAAV_2_run0	1/sp|Q6ZRI6|CO039_HUMAN	237543	2219.96	2.60035e-06	2219.96	0	9.17972e-06
1582_YMIDNVILL_2_run0	2/sp|Q8N8Y2|VA0D2_HUMAN/sp|P61421|VA0D1_HUMAN	33757	5761.31	2.61214e-06	5761.31	0	9.18748e-06
1898_APRPPSSSP_2_run0	1/sp|Q5H9R7|PP6R3_HUMAN	359051	879.652	2.61529e-06	879.652	0	9.20593e-06
360_FVFPGELLL_2_run0	1/sp|Q15758|AAAT_HUMAN	213683	6604.27	2.61855e-06	6604.27	0	9.28889e-06
2173_HPESERISM_2_run0	1/sp|Q01082|SPTB2_HUMAN	38480	1289.09	2.62607e-06	1289.09	0	9.31829e-06
2104_GPAPSRPAL_2_run0	1/sp|Q8TDD1|DDX54_HUMAN	96423	1692.78	2.62813e-06	1692.78	0	9.33258e-06
431_GLLENIPRV_2_run0	1/sp|P22102|PUR2_HUMAN	131692	4083.46	2.62907e-06	4083.46	0	9.35178e-06
885_LLGPPPVGV_2_run0	1/sp|Q9ULV3|CIZ1_HUMAN	474327	3770.19	2.64073e-06	3770.19	0	9.40915e-06
3047_RPKPSSSPVIF_2_run0	1/sp|Q15366|PCBP2_HUMAN	342396	2250.99	2.64591e-06	2250.99	0	9.45107e-06
1939_APRVPVQAL_2_run0	1/sp|O75179|ANR17_HUMAN	1840040	2721.55	2.65393e-06	2721.55	0	9.45241e-06
3369_SPALKTTRL_2_run0	1/sp|Q5SW79|CE170_HUMAN	121487	1475.74	2.65936e-06	1475.74	0	9.45588e-06
652_KLAESVEKA_2_run0	1/sp|Q9Y5B9|SP16H_HUMAN	32956	839.169	2.66181e-06	839.169	0	9.47025e-06
3134_RPQTGLSFL_2_run0	1/sp|P43686|PRS6B_HUMAN	434662	3630.74	2.66936e-06	3630.74	0	9.47249e-06
3795_TPKMPGQSV_2_run0	1/sp|Q8WYP5|ELYS_HUMAN	84244	1616.92	2.67837e-06	1616.92	0	9.49904e-06
916_LLNEILEQV_2_run0	1/sp|Q9BPX3|CND3_HUMAN	41682	4987.82	2.68822e-06	4987.82	0	9.5205e-06
2125_GPLFRNSQL_2_run0	1/sp|Q86YD1|PTOV1_HUMAN	77245	2862.01	2.69767e-06	2862.01	0	9.54756e-06
2410_KPLDRKLIL_2_run0	1/sp|P29401|TKT_HUMAN	40986	2183.34	2.70311e-06	2183.34	0	9.56733e-06
2442_KPQPRPQTL_2_run0	1/sp|Q9NR20|DYRK4_HUMAN	93493	889.076	2.70408e-06	889.076	0	9.60294e-06
2531_KPWLRALQL_2_run0	1/sp|Q8NI99|ANGL6_HUMAN	64646	3930.1	2.7097e-06	3930.1	0	9.62046e-06
1085_RLLEGYEIYV_2_run0	1/sp|Q14676|MDC1_HUMAN	57176	4336.58	2.72532e-06	4336.58	0	9.69999e-06
1502_YLGDVSERV_2_run0	1/sp|P53621|COPA_HUMAN	77148	2445.54	2.73288e-06	2445.54	0	9.72892e-06
1636_APALLGLAL_2_run0	1/sp|Q96RJ3|TR13C_HUMAN	66223	5571.57	2.73875e-06	5571.57	0	9.75459e-06
222_FLFDGSPTYVL_2_run0	1/sp|P49327|FAS_HUMAN	25428	5725.09	2.74814e-06	5725.09	0	9.77583e-06
827_KMWEELPEVV_2_run0	1/sp|Q02338|BDH_HUMAN	56667	4352.42	2.74978e-06	4352.42	0	9.77718e-06
411_GLIDGVVEA_2_run0	1/sp|P14866|HNRPL_HUMAN	221306	3621.38	2.75893e-06	3621.38	0	9.78945e-06
1427_VLWDRTFSLF_2_run0	1/sp|P42224|STAT1_HUMAN	11898	5741.14	2.75922e-06	5741.14	0	9.82598e-06
2371_KPIAVGSMSM(UniMod:35)L_2_run0	1/sp|Q9UBT6|POLK_HUMAN	94715	3023.67	2.75922e-06	3023.67	0	9.80332e-06
1052_RLDELGGVYL_2_run0	1/sp|P04844|RPN2_HUMAN	151606	4110.98	2.76404e-06	4110.98	0	9.87032e-06
2955_RPFERTITM_2_run0	1/sp|O00560|SDCB1_HUMAN	163648	2229.77	2.76562e-06	2229.77	0	9.91572e-06
426_GLLAGDRLVEV_2_run0	1/sp|O14745|NHRF1_HUMAN	57110	3933.18	2.77718e-06	3933.18	0	9.92178e-06
2786_NPRQAAYEM(UniMod:35)_2_run0	1/sp|Q9H0D6|XRN2_HUMAN	42833	798.485	2.78301e-06	798.485	0	9.92533e-06
295_FLPLIVNTV_2_run0	1/sp|Q709C8|VP13C_HUMAN	24917	5426.44	2.79037e-06	5426.44	0	9.99351e-06
2128_GPLPRAAAL_2_run0	1/sp|Q96KG9|NTKL_HUMAN	129550	2562.65	2.79666e-06	2562.65	0	1.00313e-05
1247_SLVAILQSV_2_run0	1/sp|Q96BM0|I27L1_HUMAN	29325	5537.72	2.80842e-06	5537.72	0	1.00516e-05
2161_GPSVLRSTL_2_run0	1/sp|O75376|NCOR1_HUMAN	220836	2462.96	2.81367e-06	2462.96	0	1.00602e-05
1471_YIFPLDDKAAV_2_run0	1/sp|Q9UKK3|PARP4_HUMAN	61797	4233.36	2.82392e-06	4233.36	0	1.01122e-05
868_LLATVLQAV_2_run0	1/sp|O60613|SEP15_HUMAN	35479	4739.53	2.82776e-06	4739.53	0	1.01236e-05
1581_YMIAHITGL_2_run0	1/sp|P04818|TYSY_HUMAN	39925	3966.73	2.83638e-06	3966.73	0	1.01334e-05
336_FLYPFPLA_2_run0	1/sp|Q5BJD5|TM41B_HUMAN	76253	5874.57	2.85041e-06	5874.57	0	1.02298e-05
3384_SPAPVPLPLL_2_run0	1/sp|Q5VWG9|TAF3_HUMAN	41835	5479.17	2.85698e-06	5479.17	0	1.03538e-05
3012_RPITDSPVL_2_run0	1/sp|Q9NZL9|MAT2B_HUMAN	432721	2553.33	2.86133e-06	2553.33	0	1.03785e-05
3375_SPANPAHIL_2_run0	1/sp|Q9H967|WDR76_HUMAN	146819	2328.21	2.87152e-06	2328.21	0	1.04641e-05
1806_APNPYRQAIMSF_2_run0	1/sp|Q7RTS9|DYM_HUMAN	25146	4016.71	2.88235e-06	4016.71	0	1.05087e-05
953_LTIEDGIFEV_2_run0	1/sp|P54652|HSP72_HUMAN	26803	5316.57	2.88941e-06	5316.57	0	1.05148e-05
3632_SPRPPHDSSL_2_run0	1/sp|Q86VV8|RTTN_HUMAN	31733	1151.35	2.90625e-06	1151.35	0	1.06001e-05
1672_APARPGPAA_2_run0	1/sp|Q04637|IF4G1_HUMAN	261325	784.443	2.9098e-06	784.443	0	1.06245e-05
2612_LPNKQRTVVTV_2_run0	1/sp|P10398|ARAF_HUMAN	12366	1693.17	2.91459e-06	1693.17	0	1.06544e-05
690_KLIEELETL_2_run0	1/sp|Q03060|CREM_HUMAN	247959	4086.8	2.9203e-06	4086.8	0	1.06571e-05
3770_TPASSRAQTL_2_run0	1/sp|Q01082|SPTB2_HUMAN	55119	1044.18	2.92464e-06	1044.18	0	1.06896e-05
1161_SIRDFLVTL_2_run0	1/sp|P23469|PTPRE_HUMAN	71554	5147.76	2.93205e-06	5147.76	0	1.07185e-05
3667_SPSDPSSSL_2_run0	1/sp|Q9BZ67|FRMD8_HUMAN	80923	1621.59	2.94234e-06	1621.59	0	1.07303e-05
2834_QPRYPVNSV_2_run0	1/sp|P17987|TCPA_HUMAN	157743	1910.46	2.94907e-06	1910.46	0	1.07361e-05
3076_RPLVVKTSL_2_run0	1/sp|P78345|RPP38_HUMAN	100309	2088.13	2.95728e-06	2088.13	0	1.07659e-05
2685_LPSWGRAEL_2_run0	1/sp|Q96EP0|RNF31_HUMAN	307651	3605.87	2.96118e-06	3605.87	0	1.07985e-05
3347_SPADRMLTV_2_run0	1/sp|Q9H6E5|STPAP_HUMAN	67688	2676.13	2.96693e-06	2676.13	0	1.07996e-05
380_GLADKVYFL_2_run0	1/sp|P27708|PYR1_HUMAN	672885	4357.21	2.97243e-06	4357.21	0	1.08037e-05
1861_APRKGTVWSL_2_run0	1/sp|Q8WUA4|TF3C2_HUMAN	158331	2499.81	2.98042e-06	2499.81	0	1.08679e-05
314_FLSTLHEVYL_2_run0	1/sp|Q9NPI6|DCP1A_HUMAN	26806	4346.41	2.98851e-06	4346.41	0	1.08973e-05
3362_SPAIPSAPL_2_run0	1/sp|O60291|MGRN1_HUMAN	78021	3380.1	2.99291e-06	3380.1	0	1.08984e-05
485_GLYPGLIWL_2_run0	1/sp|O14896|IRF6_HUMAN	38199	6567.53	2.99449e-06	6567.53	0	1.09596e-05
3383_SPAPTITSL_2_run0	1/sp|Q7Z6Z7|HUWE1_HUMAN	112701	3286.03	3.00021e-06	3286.03	0	1.0971e-05
2827_QPRDPPTETL_2_run0	1/sp|Q9UIM3|FKBPL_HUMAN	39163	1744.25	3.00639e-06	1744.25	0	1.09736e-05
117_ALVDQLWKL_2_run0	1/sp|Q6P1X5|TAF2_HUMAN	13003	5157.13	3.01389e-06	5157.13	0	1.10305e-05
1907_APRQQQQQTEL_2_run0	1/sp|P27540|ARNT_HUMAN	10748	1037.54	3.02281e-06	1037.54	0	1.1069e-05
608_ILYPKTLFL_2_run0	1/sp|Q08209|PP2BA_HUMAN	55713	4878.51	3.03516e-06	4878.51	0	1.107e-05
3866_TPWQPPTVL_2_run0	1/sp|Q9NZJ0|DTL_HUMAN	401699	4457.82	3.03604e-06	4457.82	0	1.10863e-05
1209_SLLDRFLA_2_run0	1/sp|Q14094|CCNI_HUMAN	53793	4637.76	3.03991e-06	4637.76	0	1.11324e-05
1173_SLAPLFFKL_2_run0	1/sp|O14617|AP3D1_HUMAN	30211	5587.45	3.05183e-06	5587.45	0	1.11558e-05
219_FLDSTSPLL_2_run0	1/sp|Q5VYK3|ECM29_HUMAN	87394	4485.51	3.065e-06	4485.51	0	1.11566e-05
1969_APSPLSSSL_2_run0	1/sp|Q96B97|SH3K1_HUMAN	80298	2967.09	3.06806e-06	2967.09	0	1.12835e-05
1623_APAGGSPRML_2_run0	1/sp|Q7L0R7|RNF44_HUMAN	116689	1740.34	3.07553e-06	1740.34	0	1.13108e-05
206_FLDGHDLQL_2_run0	1/sp|Q969V6|MKL1_HUMAN	41492	3955.05	3.08275e-06	3955.05	0	1.13267e-05
722_KLLEVNGVAL_2_run0	1/sp|Q14160|SCRIB_HUMAN	63392	3978.29	3.09325e-06	3978.29	0	1.13679e-05
173_FIIQGLRSV_2_run0	1/sp|P01906|DQA2_HUMAN	1506070	3980.83	3.10637e-06	3980.83	0	1.14287e-05
2274_IPRLPERMTTL_3_run0	1/sp|O95466|FMNL_HUMAN	220923	3414.87	3.10854e-06	3414.87	0	1.15207e-05
2589_LPIAASSSL_2_run0	1/sp|Q9GZS3|WDR61_HUMAN	97813	3229.46	3.12738e-06	3229.46	0	1.15322e-05
3054_RPKSTSTSSM_2_run0	1/sp|P27816|MAP4_HUMAN	69651	337.339	3.13487e-06	337.339	0	1.15791e-05
3361_SPAILPPL_2_run0	2/sp|Q92681|RSCA1_HUMAN/sp|Q9BRQ3|NUD22_HUMAN	198540	4622.37	3.14869e-06	4622.37	0	1.16118e-05
1422_VLVEDSNNHHL_3_run0	1/sp|O96006|ZBED1_HUMAN	29088	1630.45	3.15641e-06	1630.45	0	1.16161e-05
1464_YAYDGKDYLA_2_run0	1/sp|P17693|HLAG_HUMAN	49725	2597.13	3.16761e-06	2597.13	0	1.16493e-05
1938_APRVLSFSL_2_run0	1/sp|P29728|OAS2_HUMAN	45948	4315.06	3.17412e-06	4315.06	0	1.16712e-05
2879_RPALFANLF_2_run0	1/sp|Q9BQG0|MBB1A_HUMAN	93950	5084.75	3.18238e-06	5084.75	0	1.17764e-05
2343_KPATSYVRTTI_3_run0	1/sp|P46779|RL28_HUMAN	41615	1984.46	3.18907e-06	1984.46	0	1.1834e-05
393_GLDNINVFL_2_run0	1/sp|Q8WWI1|LMO7_HUMAN	27373	5322.12	3.19597e-06	5322.12	0	1.19208e-05
3394_SPAVERLIS_2_run0	1/sp|Q9BQ52|RNZ2_HUMAN	153946	2610.09	3.20562e-06	2610.09	0	1.19323e-05
2296_IPYHSEVPVSL_2_run0	1/sp|Q01082|SPTB2_HUMAN	839914	3552.51	3.21181e-06	3552.51	0	1.19832e-05
107_ALSQDIPEI_2_run0	1/sp|Q6P2E9|EDC4_HUMAN	96568	3995.2	3.22321e-06	3995.2	0	1.19982e-05
1480_YLAERIPTL_2_run0	1/sp|P19237|TNNI1_HUMAN	369007	3739.04	3.22475e-06	3739.04	0	1.20008e-05
675_KLHDVELHQV_3_run0	1/sp|O14775|GBB5_HUMAN	54843	1612.58	3.22724e-06	1612.58	0	1.20993e-05
1273_TLADLVHHV_2_run0	1/sp|Q9Y4A5|TRRAP_HUMAN	231714	3210.52	3.23427e-06	3210.52	0	1.21348e-05
2135_GPNSNRSQF_2_run0	1/sp|Q13356|PPIL2_HUMAN	121333	817.536	3.23851e-06	817.536	0	1.21943e-05
2876_RPAGLSPTL_2_run0	1/sp|Q14135|VGLL4_HUMAN	457335	2280.18	3.24431e-06	2280.18	0	1.23286e-05
270_FLLPDVIRI_2_run0	1/sp|Q9NVG8|TBC13_HUMAN	154295	5689.99	3.24697e-06	5689.99	0	1.23386e-05
91_ALPEIFTEL_2_run0	1/sp|Q2VIR3|IF2GL_HUMAN	46748	5767.67	3.25633e-06	5767.67	0	1.23641e-05
3842_TPSASRKSL_2_run0	1/sp|Q5SRE5|NU188_HUMAN	150202	655.436	3.2613e-06	655.436	0	1.24008e-05
1447_VMTLVSTYL_2_run0	1/sp|Q9UNL2|SSRG_HUMAN	62130	4953.75	3.27197e-06	4953.75	0	1.24195e-05
2176_HPHAVNEIAL_2_run0	1/sp|Q96PY5|FMNL2_HUMAN	210339	2170.21	3.28419e-06	2170.21	0	1.24459e-05
1189_SLHPDLIYNV_2_run0	1/sp|Q9BR76|COR1B_HUMAN	40612	3793.79	3.2883e-06	3793.79	0	1.25588e-05
3702_SPSSVTGNAL_2_run0	1/sp|Q9NYB0|TE2IP_HUMAN	545262	2006.6	3.2989e-06	2006.6	0	1.25606e-05
3460_SPIERNEQL_2_run0	1/sp|Q9NYT6|ZN226_HUMAN	40753	1667.32	3.30524e-06	1667.32	0	1.25905e-05
3685_SPSLPNISL_2_run0	1/sp|Q9UQL6|HDAC5_HUMAN	103836	4460.55	3.31594e-06	4460.55	0	1.2615e-05
2316_KIRNFVVVF_2_run0	1/sp|Q9BYX4|IFIH1_HUMAN	487919	3873.25	3.31717e-06	3873.25	0	1.26222e-05
2182_HPIYNIKSL_2_run0	1/sp|Q13601|KRR1_HUMAN	87839	2600.18	3.33383e-06	2600.18	0	1.26251e-05
1694_APDKHHITPLL_2_run0	1/sp|P58546|MTPN_HUMAN	67853	2137.74	3.34377e-06	2137.74	0	1.26621e-05
1827_APRAPAAGL_2_run0	1/sp|Q86YV0|RASL3_HUMAN	173452	1625.48	3.35871e-06	1625.48	0	1.27234e-05
2558_LPALPTQAL_2_run0	1/sp|Q9P2Q2|FRM4A_HUMAN	292608	4269.32	3.37586e-06	4269.32	0	1.27433e-05
1733_APHALLQAVL_2_run0	1/sp|P49327|FAS_HUMAN	95995	4046.75	3.39092e-06	4046.75	0	1.27477e-05
625_KIIDFIYTA_2_run0	1/sp|Q9P2N7|KLH13_HUMAN	139062	4230.62	3.4039e-06	4230.62	0	1.30088e-05
2793_NPRVKAAAL_2_run0	1/sp|O15269|SPTC1_HUMAN	131640	1151.79	3.40676e-06	1151.79	0	1.30459e-05
3452_SPHGGALVM(UniMod:35)_2_run0	1/sp|Q8N201|INT1_HUMAN	110290	988.448	3.41683e-06	988.448	0	1.30737e-05
1516_YLIPLLERL_2_run0	1/sp|P26196|DDX6_HUMAN	369734	5799.62	3.42684e-06	5799.62	0	1.30876e-05
634_KIMTEKELLAV_2_run0	1/sp|Q14254|FLOT2_HUMAN	39302	3177.71	3.43587e-06	3177.71	0	1.3198e-05
1952_APSGQHSQAQL_2_run0	1/sp|O00411|RPOM_HUMAN	56747	902.2	3.44692e-06	902.2	0	1.32134e-05
2342_KPATKTAEL_2_run0	1/sp|P18583|SON_HUMAN	169108	615.829	3.45108e-06	615.829	0	1.32159e-05
2690_LPTWRPTSM_2_run0	1/sp|Q8TB40|ABHD4_HUMAN	88628	3387.89	3.4568e-06	3387.89	0	1.32804e-05
1011_QLDDLKVEL_2_run0	1/sp|P42766|RL35_HUMAN	84589	3890.34	3.45882e-06	3890.34	0	1.3292e-05
1319_TLVDFPLHL_2_run0	1/sp|Q8WXG6|MADD_HUMAN	39945	5288.26	3.4689e-06	5288.26	0	1.33096e-05
481_GLYEGLDWLA_2_run0	1/sp|P61204|ARF3_HUMAN	44514	5631.23	3.4787e-06	5631.23	0	1.33784e-05
1637_APALPGPAL_2_run0	1/sp|O00303|EIF3F_HUMAN	123163	3556.26	3.48226e-06	3556.26	0	1.339e-05
3604_SPRKETSARSL_3_run0	1/sp|Q92844|TANK_HUMAN	43069	484.954	3.48761e-06	484.954	0	1.34555e-05
2071_FPNLRSISL_2_run0	1/sp|Q5QJ74|TBCEL_HUMAN	83189	4511.5	3.49216e-06	4511.5	0	1.34781e-05
1961_APSLKNAAF_2_run0	1/sp|P24539|AT5F1_HUMAN	85988	2421.68	3.49639e-06	2421.68	0	1.34858e-05
1883_APRPAAPAA_2_run0	1/sp|Q12872|SFSWA_HUMAN	134752	945.474	3.51079e-06	945.474	0	1.34878e-05
3560_SPQPQRAQL_2_run0	1/sp|Q9P246|STIM2_HUMAN	157331	1302.57	3.52238e-06	1302.57	0	1.36251e-05
1579_YMADRLLGV_2_run0	1/sp|Q14999|CUL7_HUMAN	46693	3687.12	3.52758e-06	3687.12	0	1.36286e-05
3630_SPRPNPTSSPLL_2_run0	1/sp|P41229|KDM5C_HUMAN	48357	2613.39	3.5325e-06	2613.39	0	1.36401e-05
2335_KPAPPFNVTV_2_run0	1/sp|Q9HBE5|IL21R_HUMAN	102710	3348.2	3.5465e-06	3348.2	0	1.36692e-05
143_AMPALAPPEV_2_run0	1/sp|P62826|RAN_HUMAN	91265	3980.21	3.56413e-06	3980.21	0	1.37027e-05
2609_LPMVPIVAL_2_run0	1/sp|Q14191|WRN_HUMAN	37121	5875.71	3.57106e-06	5875.71	0	1.38949e-05
1226_SLLPYLPML_2_run0	1/sp|Q9Y4A5|TRRAP_HUMAN	11133	6713.8	3.58023e-06	6713.8	0	1.3907e-05
2108_GPASRVSQL_2_run0	1/sp|Q9H7N4|SFR19_HUMAN	162624	1587.06	3.58509e-06	1587.06	0	1.39476e-05
3796_TPKNTSVSL_2_run0	1/sp|Q96TA2|YMEL1_HUMAN	261798	1559.7	3.59853e-06	1559.7	0	1.40006e-05
1074_RLIPTLVSI_2_run0	1/sp|Q96P70|IPO9_HUMAN	154128	4561.62	3.60768e-06	4561.62	0	1.40023e-05
165_FGSAFATPFL_2_run0	1/sp|P15954|COX7C_HUMAN	31584	5487.1	3.60949e-06	5487.1	0	1.40292e-05
1772_APKSGNTGEL_2_run0	1/sp|Q16666|IF16_HUMAN	68596	796.553	3.61742e-06	796.553	0	1.40406e-05
101_ALSDLEITL_2_run0	1/sp|Q96AC1|FERM2_HUMAN	76286	4953.97	3.628e-06	4953.97	0	1.40422e-05
3703_SPSTNRGPIQM_2_run0	1/sp|Q6VMQ6|MCAF1_HUMAN	36127	1964.3	3.63011e-06	1964.3	0	1.4147e-05
1803_APNLKILNL_2_run0	1/sp|Q9UBU9|NXF1_HUMAN	26292	4337.17	3.64115e-06	4337.17	0	1.41599e-05
1051_RLDDSLLYL_2_run0	1/sp|P49406|RM19_HUMAN	294478	4555.74	3.64462e-06	4555.74	0	1.41736e-05
3919_VPRGQGSQF_2_run0	1/sp|O75807|PR15A_HUMAN	239973	1152.18	3.65078e-06	1152.18	0	1.42588e-05
836_KVAPAPAVV_2_run0	1/sp|P62424|RL7A_HUMAN	461396	1720.76	3.66111e-06	1720.76	0	1.42612e-05
2662_LPRVADILTQL_2_run0	1/sp|Q9BZZ5|API5_HUMAN	82783	5382.32	3.66989e-06	5382.32	0	1.42949e-05
2673_LPSLARSAL_2_run0	1/sp|A3KMH1|VWA8_HUMAN	140023	3126.27	3.67674e-06	3126.27	0	1.439e-05
2031_ATREAGSAL_2_run0	1/sp|P20248|CCNA2_HUMAN	141117	792.732	3.68695e-06	792.732	0	1.44002e-05
3615_SPRLSQTFL_2_run0	1/sp|Q92608|DOCK2_HUMAN	454450	3219.23	3.68899e-06	3219.23	0	1.45307e-05
3248_RPSQNNTIGL_2_run0	1/sp|Q9H0H0|INT2_HUMAN	45453	1853.7	3.70464e-06	1853.7	0	1.45996e-05
583_ILQDRLNQV_2_run0	1/sp|Q99741|CDC6_HUMAN	78632	2444.55	3.71241e-06	2444.55	0	1.46373e-05
969_MLLATLLLLLL_3_run0	1/sp|Q7Z4F1|LRP10_HUMAN	6907920	3773.59	3.71799e-06	3773.59	0	1.4664e-05
1170_SLAETDKITL_2_run0	1/sp|P38606|VATA_HUMAN	57134	3169.31	3.72906e-06	3169.31	0	1.47184e-05
3446_SPGQRAVLL_2_run0	1/sp|Q12772|SRBP2_HUMAN	226522	2204.06	3.74182e-06	2204.06	0	1.47492e-05
1942_APSAAKLLVQL_2_run0	1/sp|Q15751|HERC1_HUMAN	23803	4232.21	3.7589e-06	4232.21	0	1.48288e-05
999_NLVSFLETV_2_run0	1/sp|Q9GZX9|TWSG1_HUMAN	17715	6057.58	3.7639e-06	6057.58	0	1.48738e-05
3554_SPQKVTLYL_2_run0	1/sp|P05107|ITB2_HUMAN	504175	3357.52	3.77231e-06	3357.52	0	1.51024e-05
2764_NPISTVTEL_2_run0	1/sp|P50991|TCPD_HUMAN	100944	3667.28	3.78729e-06	3667.28	0	1.53238e-05
3918_VPREPPVSL_2_run0	1/sp|Q8TEQ8|PIGO_HUMAN	177958	2753.9	3.79748e-06	2753.9	0	1.53849e-05
6_AIIEYMPLL_2_run0	1/sp|P30153|2AAA_HUMAN	22511	5890.08	3.80248e-06	5890.08	0	1.54221e-05
3815_TPQSNRPVM(UniMod:35)_2_run0	1/sp|P24928|RPB1_HUMAN	269334	549.987	3.82041e-06	549.987	0	1.5428e-05
DECOY_668_KLGDFGLL_2_run0	DECOY_1/sp|Q99640|PMYT1_HUMAN	65518	4358.16	3.82556e-06	4358.16	0	1.55144e-05
2027_APYMRSMMQSL_2_run0	1/sp|Q9UMX0|UBQL1_HUMAN	16289	3735.5	3.82556e-06	3735.5	0	1.55155e-05
1296_TLLEDGTFKV_2_run0	1/sp|Q9HBL8|NMRL1_HUMAN	80971	3865.34	3.83532e-06	3865.34	0	1.55162e-05
744_KLMGQIHQL_2_run0	1/sp|Q8TBA6|GOGA5_HUMAN	43068	2163.84	3.84008e-06	2163.84	0	1.55326e-05
1158_SILHDVVEV_2_run0	1/sp|O75391|SPAG7_HUMAN	649311	3525.48	3.84724e-06	3525.48	0	1.56775e-05
443_GLMDTVKKV_2_run0	1/sp|Q9Y692|GMEB1_HUMAN	61509	2565.16	3.85935e-06	2565.16	0	1.57271e-05
1246_SLTGHISTV_2_run0	1/sp|O43660|PLRG1_HUMAN	83576	2052.22	3.8616e-06	2052.22	0	1.5764e-05
409_GLIDENPGL_2_run0	1/sp|P78527|PRKDC_HUMAN	70582	3529.17	3.88323e-06	3529.17	0	1.57956e-05
1559_YLSKIIPAL_2_run0	1/sp|P40937|RFC5_HUMAN	112312	4278.98	3.88741e-06	4278.98	0	1.58053e-05
10_AIQDKLFQV_2_run0	1/sp|Q9BRQ6|CHCH6_HUMAN	125932	3712.25	3.89647e-06	3712.25	0	1.58774e-05
401_GLFDQHFRL_2_run0	1/sp|Q9Y2I1|NISCH_HUMAN	27343	4309.9	3.89989e-06	4309.9	0	1.58989e-05
1825_APRALLLLL_2_run0	2/sp|Q29865|1C18_HUMAN/sp|P10321|1C07_HUMAN	4435430	5387.13	3.91409e-06	5387.13	0	1.5925e-05
1738_APHLVGPHL_2_run0	2/sp|Q6P2I3|FAH2B_HUMAN/sp|Q96GK7|FAH2A_HUMAN	171250	2316.11	3.92688e-06	2316.11	0	1.60128e-05
686_KLIDKLDSL_2_run0	1/sp|Q8N1I0|DOCK4_HUMAN	103363	3170.84	3.93715e-06	3170.84	0	1.6019e-05
2743_MPSEQIRNQL_2_run0	1/sp|Q14152|EIF3A_HUMAN	36683	2450.55	3.94618e-06	2450.55	0	1.6028e-05
2190_HPQPGSANSL_2_run0	1/sp|Q8IYI0|CT196_HUMAN	32426	1208.27	3.96042e-06	1208.27	0	1.60918e-05
1791_APLSEDQRTAL_2_run0	1/sp|O15397|IPO8_HUMAN	39116	2067.29	3.97261e-06	2067.29	0	1.60919e-05
2120_GPIYPGHGM_2_run0	1/sp|Q9UHA3|RLP24_HUMAN	184610	2077.26	3.98335e-06	2077.26	0	1.61346e-05
2433_KPNTSSKRSSL_3_run0	1/sp|Q07326|PIGF_HUMAN	28261	328.171	3.98886e-06	328.171	0	1.6159e-05
3247_RPSQNLLQL_2_run0	1/sp|Q71SY5|MED25_HUMAN	493589	3306.92	3.99245e-06	3306.92	0	1.62186e-05
1408_VLQDIQVM_2_run0	1/sp|P33992|MCM5_HUMAN	45834	3560.37	4.01518e-06	3560.37	0	1.63689e-05
1269_TIAEVGKWLQA_2_run0	1/sp|P35573|GDE_HUMAN	15505	4173.14	4.01566e-06	4173.14	0	1.64713e-05
3566_SPRAGQLLEVL_2_run0	1/sp|Q96AP0|ACD_HUMAN	33735	4158.06	4.03545e-06	4158.06	0	1.64811e-05
1026_QLSPRLLEV_2_run0	1/sp|Q460N5|PAR14_HUMAN	63012	3706.97	4.04197e-06	3706.97	0	1.65962e-05
168_FIFSDTHEL_2_run0	1/sp|Q9UKK3|PARP4_HUMAN	45558	3880.89	4.05108e-06	3880.89	0	1.66265e-05
1594_YVLPVVSYI_2_run0	1/sp|Q8IXH7|NELFD_HUMAN	52998	5685.68	4.06326e-06	5685.68	0	1.67233e-05
829_KQISQAYEV_2_run0	1/sp|P31689|DNJA1_HUMAN	88052	1856.03	4.06612e-06	1856.03	0	1.68077e-05
1159_SILRHVAEV_2_run0	1/sp|P05198|IF2A_HUMAN	81986	2046.35	4.07423e-06	2046.35	0	1.68235e-05
3876_VPAPVPLMSL_2_run0	1/sp|Q9UQ35|SRRM2_HUMAN	214419	5169.99	4.09419e-06	5169.99	0	1.69948e-05
2798_NVRPVPLEL_2_run0	1/sp|O75643|U520_HUMAN	952499	3553.74	4.09713e-06	3553.74	0	1.70121e-05
2544_KVRAVFDNL_2_run0	1/sp|Q9UHY1|NRBP_HUMAN	67237	2613	4.11289e-06	2613	0	1.71607e-05
557_ILISTLPSV_2_run0	1/sp|Q8WXH0|SYNE2_HUMAN	22804	4614.08	4.12086e-06	4614.08	0	1.72079e-05
771_KLTEENTTL_2_run0	1/sp|Q86TG7|PEG10_HUMAN	28135	1725.8	4.1312e-06	1725.8	0	1.73164e-05
2647_LPRLPVPAV_2_run0	1/sp|P50416|CPT1A_HUMAN	40385	4186.45	4.14443e-06	4186.45	0	1.73522e-05
2225_IPAKPPVSF_2_run0	1/sp|Q6PKC3|TXD11_HUMAN	277768	3106	4.14856e-06	3106	0	1.74432e-05
1818_APQSNKERL_2_run0	1/sp|Q8N1F7|NUP93_HUMAN	55457	517.214	4.15494e-06	517.214	0	1.75693e-05
1781_APLLRGAVF_2_run0	1/sp|P49815|TSC2_HUMAN	29907	3654.1	4.16718e-06	3654.1	0	1.76027e-05
1924_APRTLVLLL_2_run0	10/sp|P10316|1A69_HUMAN/sp|P01891|1A68_HUMAN/sp|P30457|1A66_HUMAN/sp|P30456|1A43_HUMAN/sp|P30453|1A34_HUMAN/sp|P30450|1A26_HUMAN/sp|P18462|1A25_HUMAN/sp|P05534|1A24_HUMAN/sp|P30447|1A23_HUMAN/sp|P01892|1A02_HUMAN	1928560	4767.07	4.17059e-06	4767.07	0	1.76306e-05
2679_LPSRPPSQL_2_run0	1/sp|Q96IT1|ZN496_HUMAN	182004	2268.33	4.17923e-06	2268.33	0	1.76363e-05
2929_RPDITHQSL_2_run0	1/sp|Q92979|NEP1_HUMAN	74319	1614.27	4.19638e-06	1614.27	0	1.76452e-05
811_KLYQTPLEL_2_run0	1/sp|P52948|NUP98_HUMAN	104617	3693.84	4.20669e-06	3693.84	0	1.76602e-05
1821_APRAASTESL_2_run0	1/sp|O43292|GPAA1_HUMAN	79027	1289.62	4.21223e-06	1289.62	0	1.76782e-05
161_FAIDPHLLLSV_2_run0	1/sp|Q29RF7|PDS5A_HUMAN	11921	5763.26	4.21607e-06	5763.26	0	1.77598e-05
3539_SPNTDREVL_2_run0	1/sp|Q14999|CUL7_HUMAN	282556	1504.93	4.22595e-06	1504.93	0	1.78067e-05
454_GLSETILAV_2_run0	1/sp|O75694|NU155_HUMAN	57452	4375.08	4.24705e-06	4375.08	0	1.78846e-05
1930_APRTVLLLL_2_run0	23/sp|Q31610|1B81_HUMAN/sp|P30498|1B78_HUMAN/sp|Q31612|1B73_HUMAN/sp|Q29836|1B67_HUMAN/sp|P10319|1B58_HUMAN/sp|P18465|1B57_HUMAN/sp|P30491|1B53_HUMAN/sp|P30490|1B52_HUMAN/sp|P18464|1B51_HUMAN/sp|P30488|1B50_HUMAN/sp|P30487|1B49_HUMAN/sp|P30486|1B48_HUMAN/sp|P30484|1B46_HUMAN/sp|P30483|1B45_HUMAN/sp|P30480|1B42_HUMAN/sp|P30479|1B41_HUMAN/sp|P30475|1B39_HUMAN/sp|Q95365|1B38_HUMAN/sp|P30685|1B35_HUM…	1678430	4823.58	4.267e-06	4823.58	0	1.78875e-05
352_FQDPVPLTV_2_run0	1/sp|O15164|TIF1A_HUMAN	92334	4423.46	4.28383e-06	4423.46	0	1.79235e-05
3004_RPILTIIT_2_run0	1/sp|P04637|P53_HUMAN	128469	3683.67	4.29597e-06	3683.67	0	1.79286e-05
3336_SARDHAISL_2_run0	1/sp|Q9Y520|PRC2C_HUMAN	86421	1571.15	4.30541e-06	1571.15	0	1.80568e-05
782_KLWDIINVNI_2_run0	1/sp|Q3SXM5|HSDL1_HUMAN	17986	5488.77	4.30971e-06	5488.77	0	1.80638e-05
552_ILFNRVLGV_2_run0	1/sp|P47712|PA24A_HUMAN	118028	4415.06	4.31809e-06	4415.06	0	1.81295e-05
2221_IPAEGRVAL_2_run0	1/sp|Q9UBQ7|GRHPR_HUMAN	931337	2458.77	4.32026e-06	2458.77	0	1.81379e-05
3404_SPDPHKGLVLL_2_run0	1/sp|P57737|CORO7_HUMAN	100953	3154.52	4.32622e-06	3154.52	0	1.81529e-05
1918_APRSLLLLLSG_2_run0	1/sp|P30511|HLAF_HUMAN	19074	5156.65	4.34494e-06	5156.65	0	1.81563e-05
3484_SPKPPTSMF_2_run0	1/sp|Q99081|HTF4_HUMAN	125616	2740.47	4.35544e-06	2740.47	0	1.82078e-05
3585_SPRFPAQYL_2_run0	1/sp|Q15477|SKIV2_HUMAN	621790	3515.31	4.38625e-06	3515.31	0	1.82182e-05
753_KLPEKWESV_2_run0	1/sp|O76021|RL1D1_HUMAN	59359	2344.52	4.41245e-06	2344.52	0	1.8292e-05
692_KLIGDTPIDT_2_run0	1/sp|P19793|RXRA_HUMAN	71355	2604.19	4.44399e-06	2604.19	0	1.84105e-05
1572_YLVSNVIEL_2_run0	1/sp|P17980|PRS6A_HUMAN	28500	4977.1	4.44898e-06	4977.1	0	1.84372e-05
1645_APAPARSLLQL_2_run0	1/sp|Q6QNY0|BL1S3_HUMAN	44373	3762.4	4.46433e-06	3762.4	0	1.84953e-05
1515_YLIPLLER_2_run0	1/sp|P26196|DDX6_HUMAN	57115	4618.42	4.48009e-06	4618.42	0	1.85678e-05
1305_TLMDILPRI_2_run0	1/sp|Q562E7|WDR81_HUMAN	45068	5373.31	4.49085e-06	5373.31	0	1.85826e-05
2234_IPDLDRHQL_2_run0	1/sp|Q9BVM2|DPCD_HUMAN	46648	2456.34	4.50477e-06	2456.34	0	1.86043e-05
1512_YLIKYIAIV_2_run0	1/sp|O00472|ELL2_HUMAN	27159	4831.39	4.52404e-06	4831.39	0	1.86212e-05
2528_KPVSVAISL_2_run0	1/sp|Q9BZ67|FRMD8_HUMAN	70693	3326.28	4.54188e-06	3326.28	0	1.86249e-05
2077_FPRFGGSL_2_run0	1/sp|Q86YC3|NRROS_HUMAN	130591	3500.31	4.56089e-06	3500.31	0	1.87172e-05
265_FLLGPEGQHLL_2_run0	1/sp|Q53GL7|PAR10_HUMAN	43576	4500.9	4.57424e-06	4500.9	0	1.87288e-05
2709_MPANSGLAL_2_run0	1/sp|O60293|ZC3H1_HUMAN	73611	3240.36	4.58347e-06	3240.36	0	1.87416e-05
1890_APRPDSRHHSL_3_run0	1/sp|Q9BSV6|SEN34_HUMAN	474431	513.895	4.5999e-06	513.895	0	1.87473e-05
102_ALSDSIHTV_2_run0	1/sp|Q9UKN5|PRDM4_HUMAN	276357	2237.6	4.62186e-06	2237.6	0	1.88939e-05
2788_NPRQPLPASGL_2_run0	1/sp|Q96L08|SUSD3_HUMAN	527415	2395.91	4.62947e-06	2395.91	0	1.88983e-05
2557_LPALPLAEL_2_run0	1/sp|Q9UJX2|CDC23_HUMAN	90732	5594.14	4.63638e-06	5594.14	0	1.8973e-05
601_ILVKHLTNV_2_run0	1/sp|A1A4S6|RHG10_HUMAN	54634	2056.96	4.6517e-06	2056.96	0	1.90111e-05
1597_AAAAGRIAI_2_run0	1/sp|P26599|PTBP1_HUMAN	49726	2056.05	4.66491e-06	2056.05	0	1.91995e-05
98_ALQSLLHLL_2_run0	1/sp|P52294|IMA5_HUMAN	17645	5499.11	4.69608e-06	5499.11	0	1.92164e-05
1414_VLSNVEVTL_2_run0	1/sp|Q14204|DYHC1_HUMAN	59128	3884.11	4.70478e-06	3884.11	0	1.93105e-05
1350_VLAHTILGV_2_run0	1/sp|Q9NUQ7|UFSP2_HUMAN	91150	3443.59	4.71404e-06	3443.59	0	1.93782e-05
700_KLIPQLPTL_2_run0	1/sp|Q9NQL2|RRAGD_HUMAN	824566	4533.08	4.72554e-06	4533.08	0	1.94202e-05
3720_SPTMPFLSL_2_run0	1/sp|Q8IUC6|TCAM1_HUMAN	37688	5606.76	4.7397e-06	5606.76	0	1.94278e-05
2005_APTVRSKAL_2_run0	1/sp|P42695|CNDD3_HUMAN	72972	953.067	4.75047e-06	953.067	0	1.96375e-05
1932_APRTVLLLLSA_2_run0	13/sp|Q31612|1B73_HUMAN/sp|Q29836|1B67_HUMAN/sp|P30488|1B50_HUMAN/sp|P30487|1B49_HUMAN/sp|P30486|1B48_HUMAN/sp|P30483|1B45_HUMAN/sp|P30480|1B42_HUMAN/sp|P30479|1B41_HUMAN/sp|P30475|1B39_HUMAN/sp|Q95365|1B38_HUMAN/sp|P30462|1B14_HUMAN/sp|P30460|1B08_HUMAN/sp|P01889|1B07_HUMAN	412813	4882.54	4.77148e-06	4882.54	0	1.97829e-05
367_FVYSQVVFSGKA_2_run0	1/sp|P01374|TNFB_HUMAN	35582	3727.71	4.78558e-06	3727.71	0	1.98263e-05
808_KLYPQLPAEI_2_run0	1/sp|Q9HCE0|EPG5_HUMAN	52246	3975.55	4.80036e-06	3975.55	0	1.98383e-05
822_KMLEKLPEL_2_run0	1/sp|Q9NUQ8|ABCF3_HUMAN	236168	3234.11	4.82754e-06	3234.11	0	1.98452e-05
186_FIWKSGGDLTL_2_run0	1/sp|Q8TAF3|WDR48_HUMAN	22592	4495.23	4.84993e-06	4495.23	0	1.9963e-05
276_FLLPLRIAL_2_run0	1/sp|Q86UL3|GPAT4_HUMAN	46498	6048.15	4.88134e-06	6048.15	0	2.00723e-05
912_LLMATILHL_2_run0	1/sp|P53618|COPB_HUMAN	23617	5562.52	4.88652e-06	5562.52	0	2.0227e-05
3877_VPASFRLQM_2_run0	1/sp|Q9BTE3|MCMBP_HUMAN	265623	3583.05	4.897e-06	3583.05	0	2.04193e-05
3502_SPLVSRLTL_2_run0	1/sp|P40926|MDHM_HUMAN	64118	3673.05	4.91302e-06	3673.05	0	2.0472e-05
1434_VLYNESLQL_2_run0	1/sp|Q5VTR2|BRE1A_HUMAN	44903	4112.88	4.92655e-06	4112.88	0	2.0485e-05
2553_LPAGSRVEL_2_run0	1/sp|P20023|CR2_HUMAN	257476	2428.39	4.93731e-06	2428.39	0	2.04901e-05
3381_SPAPRTAL_2_run0	1/sp|Q96RJ3|TR13C_HUMAN	301782	1336.05	4.94871e-06	1336.05	0	2.05007e-05
1317_TLTNVIHNL_2_run0	1/sp|Q53FV1|ORML2_HUMAN	114758	3530.69	4.98262e-06	3530.69	0	2.05824e-05
1277_TLDDLIAAV_2_run0	1/sp|Q8IWZ3|ANKH1_HUMAN	60179	4935.19	4.99164e-06	4935.19	0	2.05897e-05
2613_LPNQARAQAAL_2_run0	1/sp|O95758|PTBP3_HUMAN	29466	2002.83	4.99318e-06	2002.83	0	2.06203e-05
378_GLADASLLKKV_2_run0	1/sp|Q9UBB4|ATX10_HUMAN	33730	3220.74	5.00227e-06	3220.74	0	2.06605e-05
3729_SPVLRLVL_2_run0	1/sp|O43432|IF4G3_HUMAN	15638	4387.81	5.02848e-06	4387.81	0	2.06971e-05
818_KMDESKHEI_2_run0	1/sp|Q9Y490|TLN1_HUMAN	28667	556.149	5.05125e-06	556.149	0	2.07068e-05
3412_SPEAVRNTL_2_run0	1/sp|O94925|GLSK_HUMAN	61906	1619.02	5.06569e-06	1619.02	0	2.07081e-05
3601_SPRISPATTL_2_run0	1/sp|Q8IVW6|ARI3B_HUMAN	593441	2411.3	5.08104e-06	2411.3	0	2.08947e-05
3910_VPPPPHRPL_2_run0	1/sp|Q9Y520|PRC2C_HUMAN	121352	1462.31	5.09418e-06	1462.31	0	2.08949e-05
797_KLYDGFQYL_2_run0	1/sp|Q9UBF8|PI4KB_HUMAN	86420	4169.63	5.11172e-06	4169.63	0	2.10084e-05
1324_TLYDIAHTPGV_2_run0	1/sp|P40926|MDHM_HUMAN	48857	3428.96	5.12466e-06	3428.96	0	2.11231e-05
1849_APRGTWSTGL_2_run0	1/sp|O60828|PQBP1_HUMAN	117707	2572.48	5.13283e-06	2572.48	0	2.11697e-05
1613_AAYLRALSL_2_run0	1/sp|O15294|OGT1_HUMAN	97839	3947.34	5.14049e-06	3947.34	0	2.13648e-05
3231_RPSGLHGDVSL_2_run0	1/sp|Q9H6E5|STPAP_HUMAN	189458	1942.47	5.16302e-06	1942.47	0	2.13851e-05
872_LLDHVLLTL_2_run0	1/sp|Q9Y490|TLN1_HUMAN	33053	4987.26	5.18717e-06	4987.26	0	2.1437e-05
656_KLFAIPILL_2_run0	1/sp|P31513|FMO3_HUMAN	42861	6108.64	5.20026e-06	6108.64	0	2.15837e-05
605_ILYDIPDIRL_2_run0	1/sp|O95363|SYFM_HUMAN	38407	5214.62	5.21145e-06	5214.62	0	2.16081e-05
288_FLNGEVIRL_2_run0	1/sp|Q99714|HCD2_HUMAN	110142	4234.18	5.22656e-06	4234.18	0	2.20333e-05
3634_SPRPPLISV_2_run0	1/sp|Q9H0R1|AP5M1_HUMAN	1339410	3142.24	5.25729e-06	3142.24	0	2.20377e-05
2907_RPAQNNATF_2_run0	1/sp|Q14BN4|SLMAP_HUMAN	39336	1031.11	5.26944e-06	1031.11	0	2.21251e-05
2187_HPMGGLNAM_2_run0	1/sp|Q92879|CELF1_HUMAN	93570	2017.28	5.2864e-06	2017.28	0	2.23647e-05
620_KIADFGWSV_2_run0	1/sp|Q9UQB9|AURKC_HUMAN	213418	4182.9	5.30026e-06	4182.9	0	2.24197e-05
12_AIVRSLPSV_2_run0	1/sp|O14983|AT2A1_HUMAN	78697	2938.83	5.32485e-06	2938.83	0	2.24366e-05
1220_SLLPAIVEL_2_run0	1/sp|P30153|2AAA_HUMAN	513004	5841.64	5.34156e-06	5841.64	0	2.24509e-05
2222_IPAGERPTI_2_run0	1/sp|Q96MX3|ZNF48_HUMAN	168103	2006.84	5.36132e-06	2006.84	0	2.25877e-05
2044_AVRPASLNL_2_run0	1/sp|Q96N67|DOCK7_HUMAN	95573	2660.01	5.37454e-06	2660.01	0	2.27028e-05
3463_SPIKDIISL_2_run0	1/sp|Q9C0A0|CNTP4_HUMAN	162530	4112.34	5.39488e-06	4112.34	0	2.27463e-05
486_GLYPNLIQV_2_run0	1/sp|Q7L2E3|DHX30_HUMAN	141947	4853.44	5.42733e-06	4853.44	0	2.27621e-05
2079_FPRLLDTKL_2_run0	1/sp|O95453|PARN_HUMAN	127842	3823.68	5.42927e-06	3823.68	0	2.28244e-05
2635_LPRGLAGALLTL_2_run0	1/sp|O00587|MFNG_HUMAN	35556	5317.7	5.4363e-06	5317.7	0	2.30651e-05
2584_LPGTHALVI_2_run0	1/sp|A6NL99|AQP73_HUMAN	105419	3258.83	5.45621e-06	3258.83	0	2.31679e-05
37_ALFGTILEL_2_run0	1/sp|P30679|GNA15_HUMAN	11912	6200.82	5.47403e-06	6200.82	0	2.32177e-05
3534_SPNRSTNTL_2_run0	1/sp|Q8IXT1|NOXIN_HUMAN	65576	772.29	5.49065e-06	772.29	0	2.33386e-05
1920_APRSVAVSSI_2_run0	1/sp|Q6UWB1|I27RA_HUMAN	576394	2030.44	5.51024e-06	2030.44	0	2.33391e-05
578_ILNPDNSFEIL_2_run0	1/sp|P27824|CALX_HUMAN	23982	5068.09	5.52619e-06	5068.09	0	2.33423e-05
292_FLNNQEYVL_2_run0	1/sp|Q01082|SPTB2_HUMAN	102678	4138.17	5.55173e-06	4138.17	0	2.33452e-05
2546_KVRGISEVL_2_run0	1/sp|O95140|MFN2_HUMAN	206187	2253.75	5.55883e-06	2253.75	0	2.34043e-05
3917_VPRDHSIYTQL_2_run0	1/sp|Q4AC99|1A1L2_HUMAN	20254	2339.36	5.56682e-06	2339.36	0	2.34205e-05
2236_IPIAVGGAL_2_run0	1/sp|P11279|LAMP1_HUMAN	32488	3964.8	5.57493e-06	3964.8	0	2.34452e-05
2923_RPDGEKKAYVRL_3_run0	1/sp|P62750|RL23A_HUMAN	190391	1253.02	5.58753e-06	1253.02	0	2.34745e-05
3670_SPSFPRPSL_2_run0	1/sp|Q92610|ZN592_HUMAN	273229	3183.23	5.59706e-06	3183.23	0	2.35644e-05
719_KLLEPVLL_2_run0	1/sp|P62249|RS16_HUMAN	581382	4202.3	5.62015e-06	4202.3	0	2.38558e-05
2101_GPALSRTLSQL_2_run0	1/sp|Q96NY9|MUS81_HUMAN	35983	3413.41	5.62946e-06	3413.41	0	2.39671e-05
2615_LPPDALVGL_2_run0	1/sp|Q15437|SC23B_HUMAN	1499050	4492	5.64543e-06	4492	0	2.42756e-05
3565_SPQSPGDAL_2_run0	1/sp|Q96KR1|ZFR_HUMAN	745687	1814.4	5.66535e-06	1814.4	0	2.42869e-05
1453_VVIRGNSIIML_2_run0	1/sp|P62308|RUXG_HUMAN	47982	4322.6	5.67938e-06	4322.6	0	2.43945e-05
1355_VLFEGRTVQL_2_run0	1/sp|Q9UPW5|CBPC1_HUMAN	50506	3904.48	5.70109e-06	3904.48	0	2.44144e-05
3431_SPGARLITI_2_run0	1/sp|P21964|COMT_HUMAN	45317	3149.13	5.70533e-06	3149.13	0	2.47644e-05
1244_SLSFMNPRL_2_run0	1/sp|Q9Y2T2|AP3M1_HUMAN	77012	3976.32	5.7518e-06	3976.32	0	2.48322e-05
3143_RPRDALPRLL_3_run0	1/sp|Q86Y56|HEAT2_HUMAN	148236	2676.71	5.78554e-06	2676.71	0	2.49115e-05
825_KMVEDLISV_2_run0	1/sp|Q9H583|HEAT1_HUMAN	132578	3674.44	5.83414e-06	3674.44	0	2.49671e-05
553_ILGIQPPSV_2_run0	1/sp|Q9UPN6|SCAF8_HUMAN	152617	4342.66	5.84922e-06	4342.66	0	2.51519e-05
2460_KPRKLVNTI_2_run0	1/sp|Q92900|RENT1_HUMAN	110335	1009.81	5.85862e-06	1009.81	0	2.54026e-05
3651_SPRSYQDFFEAI_2_run0	1/sp|P18850|ATF6A_HUMAN	21936	4824.09	5.8828e-06	4824.09	0	2.55273e-05
2844_RAALPTPAL_2_run0	1/sp|Q9H3S7|PTN23_HUMAN	146194	3003.29	5.89594e-06	3003.29	0	2.5755e-05
678_KLHYVVTEV_2_run0	1/sp|Q9Y4A5|TRRAP_HUMAN	89515	2289.59	5.92654e-06	2289.59	0	2.58286e-05
1823_APRAGQPLQL_2_run0	1/sp|P25325|THTM_HUMAN	319489	2462.51	5.93641e-06	2462.51	0	2.59872e-05
335_FLYPFLHTV_2_run0	1/sp|Q92600|RCD1_HUMAN	33760	5013.81	5.96505e-06	5013.81	0	2.6025e-05
3458_SPHVLTTEL_2_run0	1/sp|Q8NI60|ADCK3_HUMAN	72378	2766.22	5.98929e-06	2766.22	0	2.60902e-05
1080_RLLDRKVLL_2_run0	1/sp|Q9H4A5|GLP3L_HUMAN	43442	2591.49	5.99385e-06	2591.49	0	2.62597e-05
2696_LVMAPRTVL_2_run0	10/sp|Q31610|1B81_HUMAN/sp|Q31612|1B73_HUMAN/sp|Q29836|1B67_HUMAN/sp|P30486|1B48_HUMAN/sp|P30480|1B42_HUMAN/sp|P30475|1B39_HUMAN/sp|Q95365|1B38_HUMAN/sp|P30462|1B14_HUMAN/sp|P30460|1B08_HUMAN/sp|P01889|1B07_HUMAN	3044730	3292.11	6.00192e-06	3292.11	0	2.63418e-05
2171_HPADNRTQI_2_run0	1/sp|P46939|UTRO_HUMAN	21776	623.51	6.01251e-06	623.51	0	2.63685e-05
2144_GPRAVDVLSEL_2_run0	1/sp|Q8NCN5|PDPR_HUMAN	45467	4216.23	6.03101e-06	4216.23	0	2.64702e-05
2258_IPNFPRSTV_2_run0	1/sp|P00491|PNPH_HUMAN	263779	2875.4	6.04471e-06	2875.4	0	2.64709e-05
510_HLLNESPML_2_run0	1/sp|Q92621|NU205_HUMAN	218235	3252.01	6.05555e-06	3252.01	0	2.65377e-05
1570_YLVPELDGV_2_run0	1/sp|Q9H269|VPS16_HUMAN	35085	4697.54	6.0613e-06	4697.54	0	2.6582e-05
3562_SPQQNRQML_2_run0	1/sp|Q9UPN3|MACF1_HUMAN	22857	1300.22	6.07274e-06	1300.22	0	2.67781e-05
3165_RPRGFAYVQF_2_run0	1/sp|O75494|SRS10_HUMAN	74311	3351.11	6.08739e-06	3351.11	0	2.69975e-05
1877_APRLPITGL_2_run0	1/sp|Q8TF50|ZN526_HUMAN	2119150	3816.06	6.09814e-06	3816.06	0	2.70287e-05
3061_RPLANQGSL_2_run0	1/sp|Q9H9D4|ZN408_HUMAN	40887	1481.73	6.11759e-06	1481.73	0	2.72561e-05
66_ALLGILQHV_2_run0	1/sp|Q8IVD9|NUDC3_HUMAN	50198	4694.76	6.13598e-06	4694.76	0	2.73097e-05
2106_GPAQIRAVL_2_run0	1/sp|P54802|ANAG_HUMAN	60488	2841.54	6.16601e-06	2841.54	0	2.73858e-05
607_ILYGKIIHL_2_run0	1/sp|P0CG13|CTF8_HUMAN	163827	3675.41	6.185e-06	3675.41	0	2.75268e-05
967_MLHSVTLFL_2_run0	1/sp|O15127|SCAM2_HUMAN	141196	4796.87	6.19792e-06	4796.87	0	2.7676e-05
631_KILPTLEAV_2_run0	1/sp|Q12905|ILF2_HUMAN	1244860	3568.8	6.21357e-06	3568.8	0	2.7983e-05
2408_KPLAAALGL_2_run0	1/sp|Q03518|TAP1_HUMAN	55351	3673.68	6.2197e-06	3673.68	0	2.79931e-05
2918_RPDDKRILEF_3_run0	1/sp|O60502|NCOAT_HUMAN	167994	2592.03	6.24066e-06	2592.03	0	2.80641e-05
812_KLYTGLREV_2_run0	1/sp|Q13618|CUL3_HUMAN	52650	2140.15	6.26838e-06	2140.15	0	2.80977e-05
180_FIMEGTLTRV_2_run0	1/sp|Q07889|SOS1_HUMAN	48162	3800.78	6.27727e-06	3800.78	0	2.818e-05
2554_LPAGVRVPL_2_run0	1/sp|Q9H6R4|NOL6_HUMAN	107014	3543.28	6.30705e-06	3543.28	0	2.82083e-05
3854_TPSPTRYSL_2_run0	1/sp|P49792|RBP2_HUMAN	148469	2243.14	6.3176e-06	2243.14	0	2.82491e-05
2095_GPAERSGAL_2_run0	1/sp|O96018|APBA3_HUMAN	66041	884.123	6.33325e-06	884.123	0	2.84533e-05
2548_KVRPSTGNSA_2_run0	1/sp|Q9UJX3|APC7_HUMAN	31625	285.175	6.34301e-06	285.175	0	2.84671e-05
614_IQDNHDGTYTV_2_run0	1/sp|P21333|FLNA_HUMAN	9438	1690.71	6.36896e-06	1690.71	0	2.84913e-05
2652_LPRPPMLLAL_2_run0	1/sp|P07686|HEXB_HUMAN	254291	5250.82	6.382e-06	5250.82	0	2.84999e-05
2243_IPKFAVATL_2_run0	1/sp|P28072|PSB6_HUMAN	46119	3968.13	6.39903e-06	3968.13	0	2.85219e-05
3880_VPASQRAVM_2_run0	1/sp|Q9ULI0|ATD2B_HUMAN	116625	1285.13	6.43255e-06	1285.13	0	2.85562e-05
3494_SPLPAGNAL_2_run0	1/sp|Q86SX3|CN080_HUMAN	112684	2883.89	6.43724e-06	2883.89	0	2.87262e-05
1895_APRPPATVTNAV_2_run0	1/sp|Q9BXS5|AP1M1_HUMAN	27339	2177.1	6.46291e-06	2177.1	0	2.89176e-05
981_MVAPAVASV_2_run0	1/sp|P05412|JUN_HUMAN	87838	2981.55	6.48116e-06	2981.55	0	2.8937e-05
2034_AVDPNRAVPL_2_run0	1/sp|Q9Y3C1|NOP16_HUMAN	2148940	2446.07	6.50238e-06	2446.07	0	2.90069e-05
2651_LPRPPMLL_2_run0	1/sp|P07686|HEXB_HUMAN	40703	4207.65	6.52041e-06	4207.65	0	2.91726e-05
3827_TPRLPQRNL_2_run0	1/sp|O43516|WIPF1_HUMAN	110460	1801.01	6.53941e-06	1801.01	0	2.92464e-05
3343_SPAAPSPLAL_2_run0	1/sp|Q9P270|SLAI2_HUMAN	46709	3675.35	6.567e-06	3675.35	0	2.94126e-05
2649_LPRNNSIGESL_2_run0	1/sp|Q86VY9|T200A_HUMAN	41620	2420.19	6.58652e-06	2420.19	0	2.95974e-05
3758_TPAEVRQVL_2_run0	1/sp|Q9H9E3|COG4_HUMAN	96853	2317.72	6.59994e-06	2317.72	0	2.97315e-05
2744_MPSLKHIVEL_2_run0	1/sp|O60518|RNBP6_HUMAN	65683	3716.53	6.62721e-06	3716.53	0	2.99561e-05
4_AIAPIIAAV_2_run0	1/sp|Q9BQ52|RNZ2_HUMAN	280542	4457.03	6.63766e-06	4457.03	0	3.00053e-05
3124_RPQLKGVVL_2_run0	1/sp|O15235|RT12_HUMAN	185419	2429.62	6.65322e-06	2429.62	0	3.01015e-05
2226_IPANRSKTAM_2_run0	1/sp|Q7Z401|MYCPP_HUMAN	31984	667.095	6.69603e-06	667.095	0	3.01083e-05
1095_RLMDNSTSV_2_run0	1/sp|Q6KC79|NIPBL_HUMAN	38195	1580.67	6.72585e-06	1580.67	0	3.01643e-05
1500_YLFPGIPELL_2_run0	1/sp|Q8NFF5|FAD1_HUMAN	13721	6747.7	6.74333e-06	6747.7	0	3.01964e-05
2738_MPRNGTGVLIL_2_run0	1/sp|Q9NVP1|DDX18_HUMAN	101848	3694.31	6.76119e-06	3694.31	0	3.03676e-05
2332_KPALFSVL_2_run0	1/sp|Q9BYU1|PBX4_HUMAN	71280	4325.08	6.78514e-06	4325.08	0	3.05328e-05
1321_TLVYHVVGV_2_run0	1/sp|Q15393|SF3B3_HUMAN	126675	3281.96	6.80186e-06	3281.96	0	3.05439e-05
1896_APRPPPKPM_2_run0	2/sp|P62854|RS26_HUMAN/sp|Q5JNZ5|RS26L_HUMAN	993430	1069.33	6.81896e-06	1069.33	0	3.06241e-05
1917_APRSLLLLL_2_run0	1/sp|P30511|HLAF_HUMAN	280962	5319.38	6.8396e-06	5319.38	0	3.07888e-05
2485_KPRSPPRALVL_3_run0	1/sp|Q86TG7|PEG10_HUMAN	253817	1842.1	6.85113e-06	1842.1	0	3.13529e-05
3926_VPRPASVSA_2_run0	1/sp|Q92830|KAT2A_HUMAN	161262	1352.07	6.88928e-06	1352.07	0	3.14205e-05
27_ALDPLADKILI_2_run0	1/sp|Q9UJA2|CRLS1_HUMAN	26616	4924.93	6.90602e-06	4924.93	0	3.15432e-05
3204_RPRPSGEEVL_2_run0	1/sp|P33992|MCM5_HUMAN	46081	1321.75	6.95074e-06	1321.75	0	3.17134e-05
273_FLLPIKTVGV_2_run0	1/sp|P49915|GUAA_HUMAN	325220	4817.44	6.99752e-06	4817.44	0	3.17382e-05
3687_SPSLPSRTL_2_run0	1/sp|O75140|DEPD5_HUMAN	164204	2294.05	7.03847e-06	2294.05	0	3.18833e-05
901_LLLKGVEAV_2_run0	1/sp|Q9UJV9|DDX41_HUMAN	43991	3330.12	7.05452e-06	3330.12	0	3.19062e-05
1725_APGPPGRSM_2_run0	1/sp|Q8IY67|RAVR1_HUMAN	423534	1174.2	7.06814e-06	1174.2	0	3.1986e-05
2317_KIRPHIATL_2_run0	1/sp|Q14671|PUM1_HUMAN	66726	1562.19	7.08743e-06	1562.19	0	3.20609e-05
1687_APAYQRFHAL_2_run0	1/sp|Q9H211|CDT1_HUMAN	39722	2438.01	7.12074e-06	2438.01	0	3.22345e-05
2756_NPASPPLSL_2_run0	1/sp|Q13155|AIMP2_HUMAN	113111	3456.32	7.13661e-06	3456.32	0	3.22698e-05
298_FLPPSFPIV_2_run0	1/sp|Q9HAU8|RNPL1_HUMAN	80013	5596.39	7.15588e-06	5596.39	0	3.23407e-05
1871_APRKVTAVIY_2_run0	1/sp|Q5T3J3|LRIF1_HUMAN	74234	1899.31	7.17828e-06	1899.31	0	3.32889e-05
1178_SLASLLVSV_2_run0	1/sp|Q15024|EXOS7_HUMAN	54731	5543.28	7.22142e-06	5543.28	0	3.34862e-05
673_KLHDINAQL_2_run0	1/sp|Q10567|AP1B1_HUMAN	101169	1950.74	7.25137e-06	1950.74	0	3.36228e-05
3678_SPSINRQTSI_2_run0	1/sp|Q9UJ41|RABX5_HUMAN	51827	1737.87	7.26847e-06	1737.87	0	3.36424e-05
3091_RPNGTKVAVL_2_run0	1/sp|Q8NHH9|ATLA2_HUMAN	233270	1483.18	7.29928e-06	1483.18	0	3.37775e-05
2134_GPNPKSSRTTL_2_run0	1/sp|P17480|UBF1_HUMAN	135124	823.416	7.33084e-06	823.416	0	3.42062e-05
49_ALIEGAGILL_2_run0	1/sp|Q99595|TI17A_HUMAN	57457	5216.64	7.33731e-06	5216.64	0	3.42981e-05
3223_RPSAAGINL_2_run0	1/sp|Q08211|DHX9_HUMAN	369343	2327.7	7.35463e-06	2327.7	0	3.44804e-05
469_GLVPFLVS_2_run0	1/sp|P52292|IMA1_HUMAN	65935	5310.66	7.37225e-06	5310.66	0	3.45938e-05
400_GLESEELEPEEL_2_run0	1/sp|Q86U42|PABP2_HUMAN	64165	3883.05	7.39507e-06	3883.05	0	3.46599e-05
53_ALITRIFGV_2_run0	1/sp|Q6YHU6|THADA_HUMAN	77778	4725.52	7.44396e-06	4725.52	0	3.46625e-05
478_GLYDSQNPPTV_2_run0	1/sp|Q96RU3|FNBP1_HUMAN	90705	2937.37	7.47264e-06	2937.37	0	3.52151e-05
781_KLWDIINVN_2_run0	1/sp|Q3SXM5|HSDL1_HUMAN	53406	4469.18	7.49775e-06	4469.18	0	3.5222e-05
2306_KAAAKRQVL_2_run0	1/sp|Q8WVT3|TPC12_HUMAN	43638	411.244	7.5382e-06	411.244	0	3.53568e-05
2702_MARGAALAL_2_run0	1/sp|P14209|CD99_HUMAN	226778	2489.45	7.55144e-06	2489.45	0	3.53908e-05
3812_TPNENRQKL_2_run0	1/sp|Q15022|SUZ12_HUMAN	74223	569.064	7.56558e-06	569.064	0	3.54373e-05
109_ALSSLIHAL_2_run0	1/sp|P13010|XRCC5_HUMAN	65593	4315.97	7.58558e-06	4315.97	0	3.55219e-05
1666_APAQRPQL_2_run0	1/sp|O75807|PR15A_HUMAN	72284	1399.39	7.6245e-06	1399.39	0	3.55661e-05
3302_RPYSFFTKL_2_run0	1/sp|P82675|RT05_HUMAN	33502	3600.58	7.64843e-06	3600.58	0	3.55916e-05
1833_APREDPVLL_2_run0	1/sp|Q7LBC6|KDM3B_HUMAN	282776	2773.83	7.67711e-06	2773.83	0	3.55994e-05
1650_APAPKAYVL_2_run0	1/sp|A6NDG6|PGP_HUMAN	175870	2450.47	7.69158e-06	2450.47	0	3.56775e-05
863_LLAEPVPGI_2_run0	1/sp|P61088|UBE2N_HUMAN	84422	4131.02	7.72986e-06	4131.02	0	3.57135e-05
1784_APLLRWVL_2_run0	1/sp|P09601|HMOX1_HUMAN	22405	5138.2	7.77332e-06	5138.2	0	3.57139e-05
2724_MPPSGPRGTL_2_run0	1/sp|Q02818|NUCB1_HUMAN	248306	1864.33	7.79223e-06	1864.33	0	3.59794e-05
577_ILNNKIPEA_2_run0	1/sp|Q96JI7|SPTCS_HUMAN	49218	2257.27	7.8097e-06	2257.27	0	3.60058e-05
1275_TLAEIAKVEL_2_run0	1/sp|Q15233|NONO_HUMAN	92617	4071.69	7.82098e-06	4071.69	0	3.60447e-05
664_KLFGMIIT_2_run0	1/sp|P61619|S61A1_HUMAN	87705	4326.89	7.8381e-06	4326.89	0	3.61262e-05
2714_MPFPNIRSAEL_2_run0	1/sp|A8MPP1|D11L8_HUMAN	46558	4294.68	7.85787e-06	4294.68	0	3.62143e-05
3308_RPYYPRKALL_3_run0	1/sp|Q6NTF7|ABC3H_HUMAN	38639	1965.45	7.88896e-06	1965.45	0	3.63927e-05
3050_RPKRPANQF_2_run0	1/sp|P67870|CSK2B_HUMAN	65410	544.443	7.9045e-06	544.443	0	3.6476e-05
1013_QLFQGVLTL_2_run0	1/sp|Q9Y5L0|TNPO3_HUMAN	33620	5500.73	7.95697e-06	5500.73	0	3.6595e-05
795_KLWSETFDV_2_run0	1/sp|Q9NR81|ARHG3_HUMAN	68136	4113.11	7.97262e-06	4113.11	0	3.66128e-05
315_FLTDSNNIKEV_2_run0	1/sp|Q15046|SYK_HUMAN	36913	2857.09	7.9873e-06	2857.09	0	3.68099e-05
1410_VLQGKLAEV_2_run0	1/sp|Q9UPN3|MACF1_HUMAN	135926	2359.42	7.99548e-06	2359.42	0	3.68237e-05
3908_VPNQKRLTLL_2_run0	1/sp|O60488|ACSL4_HUMAN	668031	2507.94	8.01888e-06	2507.94	0	3.68319e-05
898_LLLDVTPLSL_2_run0	3/sp|P11142|HSP7C_HUMAN/sp|P54652|HSP72_HUMAN/sp|P38646|GRP75_HUMAN	17846	6016.45	8.02757e-06	6016.45	0	3.72301e-05
1595_YVSDLELSA_2_run0	2/sp|P16619|CL3L1_HUMAN/sp|P10147|CCL3_HUMAN	58760	3335.48	8.08196e-06	3335.48	0	3.72568e-05
1721_APGKKTSGL_2_run0	1/sp|Q9UBU8|MO4L1_HUMAN	126867	403.062	8.09257e-06	403.062	0	3.74116e-05
1967_APSPLQPAL_2_run0	1/sp|Q9BW85|CCD94_HUMAN	115043	3277.58	8.12236e-06	3277.58	0	3.74408e-05
3197_RPRPGNILLQL_2_run0	1/sp|Q8TEL6|TP4AP_HUMAN	32349	3711.57	8.16525e-06	3711.57	0	3.76186e-05
3527_SPNPARGHSV_2_run0	1/sp|P01106|MYC_HUMAN	101686	582.279	8.19043e-06	582.279	0	3.7696e-05
2152_GPRNAQRVL_2_run0	1/sp|Q8IWA4|MFN1_HUMAN	73648	855.662	8.21863e-06	855.662	0	3.77076e-05
1401_VLMGSLVYL_2_run0	1/sp|Q9H871|RMD5A_HUMAN	33110	5451.14	8.25795e-06	5451.14	0	3.7742e-05
3858_TPSSGKSAV_2_run0	2/sp|P01877|IGHA2_HUMAN/sp|P01876|IGHA1_HUMAN	61207	439.744	8.27515e-06	439.744	0	3.7792e-05
1608_AARPVPWNAL_2_run0	1/sp|Q05923|DUS2_HUMAN	149185	3549.08	8.28922e-06	3549.08	0	3.78709e-05
229_FLFEPVVKA_2_run0	1/sp|Q6IN85|P4R3A_HUMAN	174127	4238.94	8.31443e-06	4238.94	0	3.79519e-05
167_FIFPASNVYL_2_run0	1/sp|Q93008|USP9X_HUMAN	24655	5644.34	8.38661e-06	5644.34	0	3.84665e-05
3870_VARPLSTAL_2_run0	1/sp|O14561|ACPM_HUMAN	433728	2347.48	8.40839e-06	2347.48	0	3.86219e-05
3283_RPWEKNSTTL_2_run0	1/sp|P50552|VASP_HUMAN	19123	1613.37	8.43744e-06	1613.37	0	3.86983e-05
2992_RPHTVLTVI_2_run0	1/sp|Q12788|TBL3_HUMAN	129744	2621.68	8.48708e-06	2621.68	0	3.87106e-05
2639_LPRGSSPSVL_2_run0	1/sp|Q9GZN2|TGIF2_HUMAN	1571160	2170.7	8.53069e-06	2170.7	0	3.87831e-05
2174_HPFPGPGLAI_2_run0	1/sp|P49915|GUAA_HUMAN	94034	3809.8	8.54432e-06	3809.8	0	3.93071e-05
3353_SPAGPGRAASL_2_run0	1/sp|Q9NWT8|AKIP_HUMAN	93000	1470.75	8.58111e-06	1470.75	0	3.99883e-05
1796_APMSAAHQL_2_run0	1/sp|P54259|ATN1_HUMAN	128454	1581.18	8.61934e-06	1581.18	0	3.99974e-05
2998_RPIGIGVQGL_2_run0	1/sp|P23921|RIR1_HUMAN	39870	3339.02	8.64461e-06	3339.02	0	4.0098e-05
2625_LPRALGSGFPHL_3_run0	1/sp|Q96CX6|LRC58_HUMAN	87848	3894.33	8.67376e-06	3894.33	0	4.02312e-05
1222_SLLPFLKAV_2_run0	1/sp|O75533|SF3B1_HUMAN	27800	5276.84	8.70499e-06	5276.84	0	4.03435e-05
2116_GPGSKRLGI_2_run0	1/sp|Q8WYR1|PI3R5_HUMAN	44641	1242.87	8.74247e-06	1242.87	0	4.05599e-05
751_KLNPQQFEV_2_run0	1/sp|P46977|STT3A_HUMAN	173124	3009.91	8.78072e-06	3009.91	0	4.0613e-05
3810_TPNDGRCHL_2_run0	1/sp|P05107|ITB2_HUMAN	37206	1034.1	8.81723e-06	1034.1	0	4.07498e-05
3515_SPMSQRPVL_2_run0	1/sp|Q9NSV4|DIAP3_HUMAN	130845	2221.26	8.85921e-06	2221.26	0	4.09252e-05
3791_TPKIQVYSRHPA_3_run0	2/sp|B2MG_HUMAN|/sp|P61769|B2MG_HUMAN	46480	1494.78	8.90771e-06	1494.78	0	4.10248e-05
2282_IPRTPLSPSPM_2_run0	1/sp|Q69YQ0|CYTSA_HUMAN	109137	3002.37	8.94027e-06	3002.37	0	4.13067e-05
1259_SLYSQVHQI_2_run0	1/sp|Q93074|MED12_HUMAN	99663	2809.3	8.95909e-06	2809.3	0	4.15087e-05
275_FLLPKVQSIQL_2_run0	1/sp|A2VDJ0|T131L_HUMAN	72661	5078.12	8.9887e-06	5078.12	0	4.15856e-05
379_GLADKVYF_2_run0	1/sp|P27708|PYR1_HUMAN	119113	3361.76	9.0055e-06	3361.76	0	4.16399e-05
3782_TPFGGRLLVL_2_run0	1/sp|Q4VC44|FWCH1_HUMAN	194139	4788.99	9.02741e-06	4788.99	0	4.17978e-05
3111_RPPPSPSGTL_2_run0	1/sp|Q14156|EFR3A_HUMAN	60831	1580.78	9.05949e-06	1580.78	0	4.20248e-05
2023_APVYMAAVI_2_run0	4/sp|O75367|H2AY_HUMAN/sp|Q9P0M6|H2AW_HUMAN/sp|Q16777|H2A2C_HUMAN/sp|Q6FI13|H2A2A_HUMAN	79956	4469.36	9.10277e-06	4469.36	0	4.21375e-05
1238_SLPDFGISYV_2_run0	1/sp|Q86UX7|URP2_HUMAN	43879	5115.81	9.10603e-06	5115.81	0	4.22122e-05
1239_SLPDIKVYL_2_run0	1/sp|O43566|RGS14_HUMAN	68108	4658.89	9.14649e-06	4658.89	0	4.22135e-05
803_KLYGKPIRV_2_run0	1/sp|Q15427|SF3B4_HUMAN	54868	1497.46	9.15336e-06	1497.46	0	4.22439e-05
3529_SPNQARAQA_2_run0	1/sp|P26599|PTBP1_HUMAN	136164	360.745	9.17327e-06	360.745	0	4.27378e-05
1200_SLIPTSPQV_2_run0	1/sp|Q5PRF9|SMAG2_HUMAN	106049	3586.62	9.18722e-06	3586.62	0	4.2768e-05
2170_HPAAKMIVM(UniMod:35)_2_run0	1/sp|P50990|TCPQ_HUMAN	40421	1307.59	9.22606e-06	1307.59	0	4.28823e-05
2621_LPQLPLAAL_2_run0	1/sp|P23610|F8I2_HUMAN	45026	5532.84	9.2387e-06	5532.84	0	4.32828e-05
668_KLGDFGLL_2_run0	1/sp|Q99640|PMYT1_HUMAN	74017	4358.16	9.2666e-06	4358.16	0	4.33432e-05
1705_APELLRALL_2_run0	1/sp|Q00653|NFKB2_HUMAN	303690	4936.25	9.29513e-06	4936.25	0	4.38089e-05
369_GIAELVPGV_2_run0	1/sp|Q9Y265|RUVB1_HUMAN	41626	4421.56	9.31533e-06	4421.56	0	4.44198e-05
457_GLSVIIPHV_2_run0	1/sp|Q15048|LRC14_HUMAN	76368	4312.55	9.36354e-06	4312.55	0	4.4685e-05
982_MVDGTLLL_2_run0	1/sp|P13747|HLAE_HUMAN	139424	4471.24	9.39166e-06	4471.24	0	4.49746e-05
3398_SPDATRESM_2_run0	1/sp|Q15036|SNX17_HUMAN	35516	889.69	9.41482e-06	889.69	0	4.52137e-05
1931_APRTVLLLLS_2_run0	15/sp|Q31612|1B73_HUMAN/sp|Q29836|1B67_HUMAN/sp|P30488|1B50_HUMAN/sp|P30487|1B49_HUMAN/sp|P30486|1B48_HUMAN/sp|P30484|1B46_HUMAN/sp|P30483|1B45_HUMAN/sp|P30480|1B42_HUMAN/sp|P30479|1B41_HUMAN/sp|P30475|1B39_HUMAN/sp|Q95365|1B38_HUMAN/sp|P30464|1B15_HUMAN/sp|P30462|1B14_HUMAN/sp|P30460|1B08_HUMAN/sp|P01889|1B07_HUMAN	57422	4566.87	9.45289e-06	4566.87	0	4.54376e-05
1963_APSLVAPAL_2_run0	1/sp|Q15691|MARE1_HUMAN	276768	3860.04	9.47818e-06	3860.04	0	4.54551e-05
3765_TPAMQRKKL_2_run0	1/sp|Q9UG63|ABCF2_HUMAN	33007	596.67	9.49626e-06	596.67	0	4.56847e-05
456_GLSTEGIYRV_2_run0	1/sp|Q9NRY4|RHG35_HUMAN	167574	3024.06	9.54429e-06	3024.06	0	4.5997e-05
366_FVYDPLVDWTA_2_run0	1/sp|Q96Q15|SMG1_HUMAN	10287	5796.46	9.59946e-06	5796.46	0	4.60497e-05
1980_APSQQRQQI_2_run0	1/sp|Q6P2Q9|PRP8_HUMAN	187157	762	9.64427e-06	762	0	4.60956e-05
2560_LPAPKGPAL_2_run0	1/sp|Q92733|PRCC_HUMAN	379241	2426.97	9.66817e-06	2426.97	0	4.61849e-05
3219_RPRTPPEAIAL_2_run0	1/sp|P49841|GSK3B_HUMAN	150821	2457.09	9.70012e-06	2457.09	0	4.61881e-05
930_LLSHVIVAL_2_run0	1/sp|Q13535|ATR_HUMAN	60250	4140.58	9.76041e-06	4140.58	0	4.63187e-05
3999_YPRSLFPSL_2_run0	1/sp|Q9NZJ4|SACS_HUMAN	218319	4433.12	9.77257e-06	4433.12	0	4.66241e-05
3719_SPTLRQLDL_2_run0	1/sp|P59045|NAL11_HUMAN	124654	3423.37	9.82036e-06	3423.37	0	4.72439e-05
1106_RLQEDLQSV_2_run0	1/sp|O75912|DGKI_HUMAN	76289	2243.6	9.83664e-06	2243.6	0	4.77287e-05
1838_APREKIVILL_2_run0	1/sp|Q9Y5S2|MRCKB_HUMAN	27263	3594.7	9.87413e-06	3594.7	0	4.77299e-05
372_GILGIQPPSV_2_run0	1/sp|Q9UPN6|SCAF8_HUMAN	142947	4639.05	9.9216e-06	4639.05	0	4.79346e-05
3696_SPSPKTSL_2_run0	1/sp|Q16666|IF16_HUMAN	86333	1197.35	9.98216e-06	1197.35	0	4.80152e-05
3869_VARMVMLGL_2_run0	1/sp|P26640|SYVC_HUMAN	37680	4172.33	1.00338e-05	4172.33	0	4.82272e-05
2012_APVKRASL_2_run0	1/sp|P51116|FXR2_HUMAN	21245	701.011	1.00639e-05	701.011	0	4.83482e-05
1545_YLPPATQVV_2_run0	1/sp|P38919|IF4A3_HUMAN	154501	3222.85	1.01365e-05	3222.85	0	4.83951e-05
144_AMPDSPAEV_2_run0	1/sp|O75081|MTG16_HUMAN	49645	2371.1	1.01766e-05	2371.1	0	4.86298e-05
1035_QQIDRVVEV_2_run0	1/sp|Q5VV42|CDKAL_HUMAN	60073	2484.65	1.02138e-05	2484.65	0	4.86335e-05
2357_KPGLFSLTL_2_run0	1/sp|Q13510|ASAH1_HUMAN	69438	4824.25	1.0257e-05	4824.25	0	4.93718e-05
1096_RLMNDM(UniMod:35)TAV_2_run0	1/sp|Q92598|HS105_HUMAN	50559	1659.59	1.03424e-05	1659.59	0	4.94981e-05
2926_RPDGHQNNL_2_run0	1/sp|Q14974|IMB1_HUMAN	36882	494.403	1.03799e-05	494.403	0	4.95519e-05
2083_FPRSPGQPSSL_2_run0	1/sp|Q5T011|SZT2_HUMAN	91191	2381.42	1.04051e-05	2381.42	0	4.96025e-05
3162_RPRETRVIAVL_3_run0	1/sp|P33076|C2TA_HUMAN	150921	2134.42	1.04271e-05	2134.42	0	5.01472e-05
3474_SPKGHLTRL_2_run0	1/sp|P29372|3MG_HUMAN	33625	730.08	1.04623e-05	730.08	0	5.02215e-05
3289_RPWTVMESL_2_run0	1/sp|O43237|DC1L2_HUMAN	108103	4097.69	1.04766e-05	4097.69	0	5.0363e-05
1528_YLLPSVVL_2_run0	1/sp|Q9NUQ2|PLCE_HUMAN	53947	5471.58	1.04954e-05	5471.58	0	5.03697e-05
2826_QPRDIGLQI_2_run0	1/sp|P20592|MX2_HUMAN	82710	3076.78	1.0541e-05	3076.78	0	5.07749e-05
2773_NPNQNKNVAL_2_run0	1/sp|Q15717|ELAV1_HUMAN	42781	1269.87	1.05566e-05	1269.87	0	5.09926e-05
2237_IPIILQSAL_2_run0	1/sp|P61619|S61A1_HUMAN	15333	5137.9	1.06035e-05	5137.9	0	5.11779e-05
1361_VLFHNLPSL_2_run0	1/sp|P19397|CD53_HUMAN	163122	4391.34	1.06206e-05	4391.34	0	5.13248e-05
2107_GPASHSRAL_2_run0	1/sp|Q14699|RFTN1_HUMAN	89053	491.569	1.06773e-05	491.569	0	5.13919e-05
137_AMAPGTVTV_2_run0	1/sp|Q9P243|ZFAT_HUMAN	73972	2581.42	1.072e-05	2581.42	0	5.14108e-05
3005_RPILTIITL_2_run0	1/sp|P04637|P53_HUMAN	3130530	5043.05	1.07757e-05	5043.05	0	5.20347e-05
3973_YPAQITPKM_2_run0	1/sp|Q9NX74|DUS2L_HUMAN	62270	2568.59	1.08277e-05	2568.59	0	5.23427e-05
3520_SPNGHRPQL_2_run0	4/sp|Q5SRD0|FA21D_HUMAN/sp|Q9Y4E1|FA21C_HUMAN/sp|Q5SNT6|FA21B_HUMAN/sp|Q641Q2|FA21A_HUMAN	205109	866.554	1.08975e-05	866.554	0	5.25651e-05
2778_NPRDPSSSSSM(UniMod:35)_2_run0	1/sp|Q9Y6N7|ROBO1_HUMAN	13381	398.574	1.09425e-05	398.574	0	5.29422e-05
2872_RPAFFAERL_2_run0	1/sp|P20073|ANXA7_HUMAN	27565	3112.43	1.09987e-05	3112.43	0	5.29798e-05
2810_QPFGGGSHM(UniMod:35)_2_run0	1/sp|Q00653|NFKB2_HUMAN	29647	875.665	1.1019e-05	875.665	0	5.31059e-05
3125_RPQLLKNAL_2_run0	1/sp|Q5SSJ5|HP1B3_HUMAN	105298	2199.84	1.10671e-05	2199.84	0	5.3301e-05
755_KLQEEIPVL_2_run0	1/sp|Q02224|CENPE_HUMAN	119810	3736.3	1.10938e-05	3736.3	0	5.33473e-05
1778_APLLKKQTL_2_run0	1/sp|P28715|ERCC5_HUMAN	22988	1660.78	1.11304e-05	1660.78	0	5.36092e-05
2623_LPQPPRDVL_2_run0	1/sp|Q9Y3M8|STA13_HUMAN	142469	3133.26	1.11659e-05	3133.26	0	5.36317e-05
1311_TLQEVHFLL_2_run0	1/sp|Q460N5|PAR14_HUMAN	65476	4645.01	1.11995e-05	4645.01	0	5.36677e-05
224_FLFDHLLTL_2_run0	1/sp|Q7L2H7|EIF3M_HUMAN	19280	6127.65	1.12389e-05	6127.65	0	5.38808e-05
2752_MPYSNGRPAL_2_run0	1/sp|Q16877|F264_HUMAN	149884	2421.45	1.13182e-05	2421.45	0	5.40096e-05
194_FLADPSAFVAA_2_run0	1/sp|Q8NHW5|RLA0L_HUMAN	257064	4546.26	1.13358e-05	4546.26	0	5.43147e-05
2888_RPANHRQLTF_2_run0	1/sp|Q9UNM6|PSD13_HUMAN	46752	1232.42	1.13444e-05	1232.42	0	5.44132e-05
1675_APASASQKL_2_run0	1/sp|Q14807|KIF22_HUMAN	45296	883.676	1.13937e-05	883.676	0	5.47904e-05
1506_YLHDQNPDAAL_2_run0	1/sp|O14579|COPE_HUMAN	32477	2205.04	1.14752e-05	2205.04	0	5.49453e-05
235_FLGENISNFL_2_run0	1/sp|O14791|APOL1_HUMAN	41724	5628.37	1.15039e-05	5628.37	0	5.50762e-05
DECOY_1749_APILKRAL_2_run0	DECOY_1/sp|Q9ULQ0|STRP2_HUMAN	102448	1786.43	1.15039e-05	1786.43	0	5.50787e-05
1180_SLDAAAGMLYL_2_run0	1/sp|P16591|FER_HUMAN	24963	5200.49	1.15301e-05	5200.49	0	5.52457e-05
3236_RPSLPLPHF_2_run0	1/sp|Q9BV38|WDR18_HUMAN	140597	3744.45	1.15613e-05	3744.45	0	5.63461e-05
3277_RPVPWNAL_2_run0	1/sp|Q05923|DUS2_HUMAN	141061	3380.47	1.15985e-05	3380.47	0	5.66292e-05
132_ALYGQPLLL_2_run0	1/sp|Q13107|UBP4_HUMAN	122227	4949.7	1.16694e-05	4949.7	0	5.66651e-05
3686_SPSLPNITL_2_run0	1/sp|P56524|HDAC4_HUMAN	219621	4556.59	1.17482e-05	4556.59	0	5.70356e-05
3374_SPALPGLKL_2_run0	1/sp|O14836|TR13B_HUMAN	556539	3890.46	1.17882e-05	3890.46	0	5.74688e-05
2227_IPASNRLLL_2_run0	1/sp|Q2NKX8|ERC6L_HUMAN	212513	3282.06	1.18466e-05	3282.06	0	5.75536e-05
1735_APHEPDGVAL_2_run0	2/sp|Q13409|DC1I2_HUMAN/sp|O14576|DC1I1_HUMAN	310621	2215.76	1.19026e-05	2215.76	0	5.85455e-05
687_KLIDLEHLL_2_run0	1/sp|Q8IYW5|RN168_HUMAN	33209	4807.35	1.19413e-05	4807.35	0	5.87835e-05
4009_YVLLKALAL_2_run0	1/sp|P11474|ERR1_HUMAN	34751	4991.95	1.19906e-05	4991.95	0	5.92851e-05
2354_KPFLGIGL_2_run0	1/sp|Q14974|IMB1_HUMAN	34075	4313.54	1.20879e-05	4313.54	0	5.93316e-05
1367_VLIANLEKL_2_run0	1/sp|Q6WRX3|ZY11A_HUMAN	56307	4169.07	1.21242e-05	4169.07	0	6.00145e-05
1947_APSDRPLQL_2_run0	1/sp|Q9H814|PHAX_HUMAN	121823	2442.4	1.21565e-05	2442.4	0	6.14255e-05
DECOY_39_ALFPAPLAQI_2_run0	DECOY_1/sp|Q8ND24|RN214_HUMAN	22355	5538.4	1.22557e-05	5538.4	0	6.21686e-05
2945_RPEEGKESL_2_run0	1/sp|Q5U3C3|TM164_HUMAN	54373	760.647	1.22557e-05	760.647	0	6.20694e-05
488_GMAERIPEL_2_run0	1/sp|O95573|ACSL3_HUMAN	304012	3357.39	1.22971e-05	3357.39	0	6.23643e-05
3378_SPAPGRLGAM_2_run0	1/sp|Q9BTC0|DIDO1_HUMAN	171120	1976.95	1.2343e-05	1976.95	0	6.25996e-05
2936_RPDPAGHLTL_2_run0	1/sp|Q9NTJ4|MA2C1_HUMAN	92870	2191.7	1.24363e-05	2191.7	0	6.26893e-05
3094_RPNGVITGL_2_run0	1/sp|Q96QD9|UIF_HUMAN	890073	2491.37	1.24891e-05	2491.37	0	6.31458e-05
296_FLPPLPTSV_2_run0	1/sp|Q13057|COASY_HUMAN	86000	4768.83	1.25448e-05	4768.83	0	6.40261e-05
882_LLFEGEKITI_2_run0	1/sp|Q9GZM3|RPB1B_HUMAN	32238	4643.77	1.25716e-05	4643.77	0	6.45877e-05
2583_LPGQLKPFETL_2_run0	2/sp|GSTP1_HUMAN|/sp|P09211|GSTP1_HUMAN	44154	4215.29	1.26033e-05	4215.29	0	6.47112e-05
2504_KPSNSKSETTL_2_run0	1/sp|Q53EZ4|CEP55_HUMAN	53409	517.559	1.26182e-05	517.559	0	6.52025e-05
2310_KARKAMSKL_2_run0	1/sp|Q13765|NACA_HUMAN	29434	310.333	1.26582e-05	310.333	0	6.53004e-05
2648_LPRLTPPVL_2_run0	1/sp|P50990|TCPQ_HUMAN	1796050	4237.28	1.27054e-05	4237.28	0	6.56284e-05
1264_SMYDKVLML_2_run0	1/sp|Q9Y5Q8|TF3C5_HUMAN	44872	4380.87	1.27939e-05	4380.87	0	6.60482e-05
1941_APRWLEEEAAL_2_run0	1/sp|Q53GL7|PAR10_HUMAN	28785	4003.55	1.28442e-05	4003.55	0	6.60775e-05
442_GLMDNEIKV_2_run0	1/sp|O14763|TR10B_HUMAN	60761	3323.24	1.29394e-05	3323.24	0	6.6116e-05
1549_YLQEVPILTL_2_run0	1/sp|P27707|DCK_HUMAN	20280	5695.76	1.29775e-05	5695.76	0	6.62504e-05
962_MLEVALTLI_2_run0	1/sp|O43402|EMC8_HUMAN	33841	5921.94	1.30403e-05	5921.94	0	6.63904e-05
3627_SPRPESGTV_2_run0	1/sp|Q9UQ84|EXO1_HUMAN	43556	810.306	1.31174e-05	810.306	0	6.64336e-05
3238_RPSLVAVAL_2_run0	1/sp|O15228|GNPAT_HUMAN	50505	3573.61	1.31725e-05	3573.61	0	6.72282e-05
DECOY_2425_KPNANRIAL_2_run0	DECOY_1/sp|P17931|LEG3_HUMAN	85498	1481.73	1.32332e-05	1481.73	0	6.77387e-05
2659_LPRSINTDTL_2_run0	1/sp|Q8NHV4|NEDD1_HUMAN	118929	2758.52	1.32332e-05	2758.52	0	6.78448e-05
2366_KPHNPGFGM_2_run0	1/sp|Q12906|ILF3_HUMAN	59707	1426.2	1.32651e-05	1426.2	0	6.80392e-05
2941_RPDVGRYLREL_3_run0	1/sp|Q96MW5|COG8_HUMAN	205217	3362.55	1.33208e-05	3362.55	0	6.81207e-05
3612_SPRLMSNAL_2_run0	1/sp|Q9NZJ7|MTCH1_HUMAN	319241	2541.56	1.34298e-05	2541.56	0	6.82509e-05
1814_APQPAKPRL_2_run0	1/sp|Q9UBN7|HDAC6_HUMAN	47687	1226.48	1.34845e-05	1226.48	0	6.86494e-05
1068_RLIESLFT_2_run0	1/sp|Q12789|TF3C1_HUMAN	155748	3937.88	1.35455e-05	3937.88	0	6.89154e-05
2349_KPEEQRQAL_2_run0	1/sp|Q15149|PLEC_HUMAN	44376	611.962	1.35905e-05	611.962	0	6.90139e-05
3003_RPIKTATTL_2_run0	1/sp|Q96KC8|DNJC1_HUMAN	18780	1204.16	1.3632e-05	1204.16	0	6.91889e-05
3823_TPRHLQLAI_2_run0	2/sp|P0C0S5|H2AZ_HUMAN/sp|Q71UI9|H2AV_HUMAN	74490	2678.72	1.36912e-05	2678.72	0	6.94509e-05
1499_YLFPGIPEL_2_run0	1/sp|Q8NFF5|FAD1_HUMAN	52911	6095.6	1.37744e-05	6095.6	0	7.04492e-05
162_FAIPMIHAV_2_run0	1/sp|Q9GZR7|DDX24_HUMAN	50542	4688.64	1.38861e-05	4688.64	0	7.0848e-05
1136_RMFDGKFVV_2_run0	1/sp|Q8TAS1|UHMK1_HUMAN	118574	3188.45	1.39011e-05	3188.45	0	7.14192e-05
3914_VPRAAFLSPLLP_2_run0	1/sp|P30040|ERP29_HUMAN	286039	5106.99	1.3919e-05	5106.99	0	7.16851e-05
537_ILDDTAKNLRV_3_run0	1/sp|Q5JRA6|MIA3_HUMAN	36756	2662.91	1.39444e-05	2662.91	0	7.17288e-05
294_FLPESVAVV_2_run0	1/sp|Q9Y2E8|SL9A8_HUMAN	50792	4200.82	1.40308e-05	4200.82	0	7.19551e-05
32_ALDTNQVLL_2_run0	1/sp|Q96GC6|ZN274_HUMAN	34690	3758.46	1.41101e-05	3758.46	0	7.3814e-05
3549_SPQGKSTSL_2_run0	1/sp|Q5SRE5|NU188_HUMAN	65536	657.691	1.41431e-05	657.691	0	7.43169e-05
1808_APNTGRANQQM_2_run0	1/sp|Q9NZS9|BFAR_HUMAN	27518	761.556	1.41609e-05	761.556	0	7.46215e-05
DECOY_1338_TVMGKIFAV_2_run0	DECOY_1/sp|Q9P2G9|KLHL8_HUMAN	392142	3842.03	1.41825e-05	3842.03	0	7.46826e-05
1309_TLNNLEIFL_2_run0	1/sp|P52701|MSH6_HUMAN	39475	5725.12	1.41825e-05	5725.12	0	7.47203e-05
3830_TPRPGSAESAL_2_run0	1/sp|Q9ULC8|ZDHC8_HUMAN	91081	1654.6	1.42471e-05	1654.6	0	7.47359e-05
2660_LPRSTVINI_2_run0	1/sp|P13164|IFM1_HUMAN	87316	3209.67	1.42921e-05	3209.67	0	7.53001e-05
1165_SLAADIPRL_2_run0	1/sp|Q8N0X4|CLYBL_HUMAN	176518	3942.78	1.43332e-05	3942.78	0	7.59529e-05
23_ALASVIMGL_2_run0	2/sp|P30154|2AAB_HUMAN/sp|P30153|2AAA_HUMAN	31099	5199.32	1.43534e-05	5199.32	0	7.65611e-05
2592_LPKIPSNATL_2_run0	1/sp|Q13451|FKBP5_HUMAN	78632	3304.35	1.44514e-05	3304.35	0	7.67657e-05
2526_KPVSLGQAL_2_run0	1/sp|O60341|KDM1A_HUMAN	147994	2460.57	1.44983e-05	2460.57	0	7.68181e-05
3633_SPRPPLGSSL_2_run0	1/sp|Q8NHM5|KDM2B_HUMAN	879625	2423.14	1.45768e-05	2423.14	0	7.75234e-05
DECOY_2463_KPRLDTEQL_2_run0	DECOY_1/sp|Q86UE8|TLK2_HUMAN	114926	1663.02	1.45768e-05	1663.02	0	7.74275e-05
3304_RPYSPSQYAL_2_run0	1/sp|Q14494|NF2L1_HUMAN	87861	2659.97	1.45846e-05	2659.97	0	7.76182e-05
DECOY_1022_QLMREVLLL_2_run0	DECOY_1/sp|Q8TDB6|DTX3L_HUMAN	70037	4685.07	1.45846e-05	4685.07	0	7.75915e-05
2539_KPYSGGLCL_2_run0	1/sp|Q9NYF3|FA53C_HUMAN	136682	2935.53	1.4631e-05	2935.53	0	7.78787e-05
3191_RPRNLGELCQRL_3_run0	1/sp|Q9UI14|PRAF1_HUMAN	135389	2744.63	1.47343e-05	2744.63	0	7.82879e-05
2534_KPYGGSGPL_2_run0	1/sp|O75362|ZN217_HUMAN	127841	1537.33	1.48432e-05	1537.33	0	7.82966e-05
649_KLAEKLTIL_2_run0	1/sp|Q9Y2A7|NCKP1_HUMAN	70328	3031.05	1.48942e-05	3031.05	0	7.87597e-05
3469_SPISHFLDL_2_run0	1/sp|Q9NVI1|FANCI_HUMAN	68847	4756.59	1.49382e-05	4756.59	0	7.89087e-05
3743_SPYLRPLTL_2_run0	1/sp|O95848|NUD14_HUMAN	385882	3931.06	1.49691e-05	3931.06	0	7.89974e-05
2405_KPKSYSSSL_2_run0	1/sp|Q9H0H0|INT2_HUMAN	40472	840.226	1.50892e-05	840.226	0	7.97034e-05
365_FVLPVATQI_2_run0	1/sp|Q99622|C10_HUMAN	16572	5068.79	1.51181e-05	5068.79	0	7.97135e-05
1510_YLIELIDRV_2_run0	1/sp|P78536|ADA17_HUMAN	19076	4968.15	1.51911e-05	4968.15	0	7.98708e-05
371_GILEGIGILAV_2_run0	1/sp|Q9BYT9|ANO3_HUMAN	12989	6111.52	1.53132e-05	6111.52	0	8.00751e-05
1437_VM(UniMod:35)APRALL_2_run0	1/sp|P10321|1C07_HUMAN	43487	2702.34	1.53707e-05	2702.34	0	8.01181e-05
3037_RPKKWSVVTF_3_run0	1/sp|Q9BUG6|ZSA5A_HUMAN	89215	2649.92	1.54364e-05	2649.92	0	8.04777e-05
3730_SPVLSLSSL_2_run0	1/sp|O15533|TPSN_HUMAN	72103	4644.22	1.54392e-05	4644.22	0	8.05422e-05
316_FLTEIENL_2_run0	1/sp|Q5VVJ2|MYSM1_HUMAN	35831	4544.04	1.54897e-05	4544.04	0	8.0565e-05
3642_SPRQNKYSVL_2_run0	1/sp|O60762|DPM1_HUMAN	27114	1557.19	1.55311e-05	1557.19	0	8.08914e-05
3628_SPRPGGPYL_2_run0	1/sp|Q92585|MAML1_HUMAN	188988	2092.8	1.56447e-05	2092.8	0	8.12373e-05
1639_APALVRLSL_2_run0	1/sp|Q2VPB7|AP5B1_HUMAN	27942	4063.06	1.57426e-05	4063.06	0	8.12788e-05
1824_APRALLLL_2_run0	1/sp|P10321|1C07_HUMAN	630164	4245.02	1.57724e-05	4245.02	0	8.22599e-05
1400_VLMENIVYL_2_run0	1/sp|Q9P2J5|SYLC_HUMAN	33132	5279.81	1.58413e-05	5279.81	0	8.22929e-05
3584_SPREQDSESQTL_2_run0	1/sp|Q14790|CASP8_HUMAN	7189	1169.86	1.58637e-05	1169.86	0	8.26734e-05
2324_KPAESLPVI_2_run0	1/sp|Q8IWX5|SGPP2_HUMAN	265390	3085.93	1.58955e-05	3085.93	0	8.35611e-05
1265_SQTFVNPHV_2_run0	1/sp|Q8IV63|VRK3_HUMAN	167861	2288.96	1.59734e-05	2288.96	0	8.43865e-05
1844_APRGKSGAAL_2_run0	1/sp|P09874|PARP1_HUMAN	307242	462.632	1.60335e-05	462.632	0	8.46125e-05
2585_LPHAPGVQM(UniMod:35)_2_run0	1/sp|Q92769|HDAC2_HUMAN	598222	1833.7	1.60481e-05	1833.7	0	8.48166e-05
3016_RPIYPVEEL_2_run0	1/sp|Q9NWB7|IFT57_HUMAN	49798	3449.39	1.61261e-05	3449.39	0	8.48788e-05
1734_APHARNGLSL_2_run0	1/sp|Q13422|IKZF1_HUMAN	304493	1516.11	1.62377e-05	1516.11	0	8.5653e-05
1176_SLAQYNPKL_2_run0	2/sp|P27986|P85A_HUMAN/sp|Q92569|P55G_HUMAN	108415	2703.34	1.62847e-05	2703.34	0	8.56644e-05
2289_IPSEWHIEL_2_run0	1/sp|Q9H583|HEAT1_HUMAN	19161	4613.36	1.63393e-05	4613.36	0	8.61947e-05
3955_VPVPHTTAL_2_run0	1/sp|P15291|B4GT1_HUMAN	163176	2397.57	1.6439e-05	2397.57	0	8.63922e-05
1364_VLFSSPPVILL_2_run0	1/sp|P04156|PRIO_HUMAN	4639	6236.74	1.64827e-05	6236.74	0	8.74985e-05
1929_APRTVLLL_2_run0	23/sp|Q31610|1B81_HUMAN/sp|P30498|1B78_HUMAN/sp|Q31612|1B73_HUMAN/sp|Q29836|1B67_HUMAN/sp|P10319|1B58_HUMAN/sp|P18465|1B57_HUMAN/sp|P30491|1B53_HUMAN/sp|P30490|1B52_HUMAN/sp|P18464|1B51_HUMAN/sp|P30488|1B50_HUMAN/sp|P30487|1B49_HUMAN/sp|P30486|1B48_HUMAN/sp|P30484|1B46_HUMAN/sp|P30483|1B45_HUMAN/sp|P30480|1B42_HUMAN/sp|P30479|1B41_HUMAN/sp|P30475|1B39_HUMAN/sp|Q95365|1B38_HUMAN/sp|P30685|1B35_HUM…	408015	3575.63	1.65629e-05	3575.63	0	8.75896e-05
245_FLIPAVELI_2_run0	1/sp|Q9NVP1|DDX18_HUMAN	56439	6473.83	1.66242e-05	6473.83	0	8.77225e-05
1494_YLFERIKEL_2_run0	1/sp|Q96SK2|TM209_HUMAN	56374	3815.63	1.66848e-05	3815.63	0	8.7999e-05
1125_RLWDHATMTEV_3_run0	1/sp|Q9Y3F4|STRAP_HUMAN	52453	2956.4	1.67835e-05	2956.4	0	8.85123e-05
2767_NPKNPGLWL_2_run0	1/sp|O94906|PRP6_HUMAN	143800	3639.12	1.68087e-05	3639.12	0	8.87841e-05
3497_SPLQASSAL_2_run0	1/sp|Q8TEK3|DOT1L_HUMAN	117694	2642.39	1.68231e-05	2642.39	0	8.87983e-05
3020_RPKALTQVL_2_run0	1/sp|Q9Y2Q5|LTOR2_HUMAN	139628	2117.27	1.68511e-05	2117.27	0	8.88984e-05
3862_TPSSVRKQL_2_run0	1/sp|Q8IWZ3|ANKH1_HUMAN	74960	863.181	1.69548e-05	863.181	0	8.95617e-05
3194_RPRPDEERPL_3_run0	1/sp|Q86YV0|RASL3_HUMAN	131949	1047.34	1.70737e-05	1047.34	0	8.99758e-05
8_AILGPTFTL_2_run0	1/sp|P04035|HMDH_HUMAN	14907	5135.53	1.70998e-05	5135.53	0	9.00855e-05
3290_RPYAAGGKKLAL_3_run0	1/sp|Q9H7U1|CCSE2_HUMAN	44223	1607.34	1.7236e-05	1607.34	0	9.05018e-05
3874_VPAEPKLAF_2_run0	1/sp|P18124|RL7_HUMAN	193147	3360.46	1.72706e-05	3360.46	0	9.07044e-05
1252_SLWGQPAEA_2_run0	1/sp|P29400|CO4A5_HUMAN	230905	3077.55	1.72959e-05	3077.55	0	9.08839e-05
1688_APAYSRAL_2_run0	1/sp|P04792|HSPB1_HUMAN	74550	1766.15	1.74019e-05	1766.15	0	9.1035e-05
3621_SPRMPSSGF_2_run0	1/sp|Q15018|F175B_HUMAN	143359	2159.57	1.7431e-05	2159.57	0	9.12901e-05
455_GLSQVAVTV_2_run0	1/sp|Q96II8|LRCH3_HUMAN	106414	3270.9	1.74819e-05	3270.9	0	9.20146e-05
1728_APGQRVGM(UniMod:35)L_2_run0	1/sp|P36956|SRBP1_HUMAN	70163	1455.33	1.75777e-05	1455.33	0	9.21413e-05
3531_SPNQKLLAV_2_run0	1/sp|Q9UNX4|WDR3_HUMAN	138792	2436.65	1.76159e-05	2436.65	0	9.31224e-05
2604_LPLLRVLSI_2_run0	1/sp|Q15345|LRC41_HUMAN	18765	5438.94	1.76515e-05	5438.94	0	9.35582e-05
1658_APAPSKGQTL_2_run0	1/sp|Q6ZRI6|CO039_HUMAN	366630	1045.17	1.77666e-05	1045.17	0	9.37463e-05
3176_RPRHQGVM_2_run0	1/sp|P62736|ACTA_HUMAN	10483	339.517	1.78247e-05	339.517	0	9.48501e-05
1882_APRNSPTGL_2_run0	1/sp|P78312|F193A_HUMAN	204452	1199.1	1.7881e-05	1199.1	0	9.62809e-05
1302_TLLNVIKSV_2_run0	1/sp|Q14643|ITPR1_HUMAN	51427	4220.45	1.79437e-05	4220.45	0	9.70355e-05
1104_RLPPPFPGL_2_run0	1/sp|Q13596|SNX1_HUMAN	56829	4292.55	1.80204e-05	4292.55	0	9.72022e-05
1419_VLTSVTEAL_2_run0	1/sp|Q7Z401|MYCPP_HUMAN	59745	3640.44	1.82112e-05	3640.44	0	9.75258e-05
3267_RPTNANLTL_2_run0	1/sp|Q9UPP1|PHF8_HUMAN	188387	2129.81	1.8302e-05	2129.81	0	9.77653e-05
1454_VVLPAPPAV_2_run0	1/sp|Q96S59|RANB9_HUMAN	88884	3867.57	1.83344e-05	3867.57	0	9.78071e-05
1695_APDKKKQKL_2_run0	1/sp|Q9NTJ3|SMC4_HUMAN	11106	271.457	1.83911e-05	271.457	0	9.78935e-05
998_NLVAIPVYV_2_run0	1/sp|Q9Y2T2|AP3M1_HUMAN	20271	5133.96	1.8477e-05	5133.96	0	9.91773e-05
344_FMFDEKLVTV_2_run0	1/sp|O00743|PPP6_HUMAN	36554	4734.42	1.84942e-05	4734.42	0	9.92709e-05
3922_VPRKVIIDDQL_2_run0	1/sp|Q9Y6W3|CAN7_HUMAN	7204	2642.6	1.85228e-05	2642.6	0	9.93997e-05
939_LLYDDKGVGL_2_run0	1/sp|Q8IXT5|RB12B_HUMAN	69062	3466.81	1.85784e-05	3466.81	0	9.9451e-05
3130_RPQPVKSEL_2_run0	1/sp|Q8WYK2|JDP2_HUMAN	34904	1132.58	1.86457e-05	1132.58	0	9.97291e-05
1745_APIGPHLQSM_2_run0	1/sp|Q14152|EIF3A_HUMAN	94475	2633.39	1.8673e-05	2633.39	0	9.98039e-05
770_KLSLVAAML_2_run0	1/sp|P11021|GRP78_HUMAN	29290	4515.47	1.87744e-05	4515.47	0	0.000100346
2891_RPAPARPTM_2_run0	1/sp|Q9Y3L3|3BP1_HUMAN	41651	1008.2	1.88595e-05	1008.2	0	0.000100359
3994_YPRPGTPAA_2_run0	1/sp|Q5VV42|CDKAL_HUMAN	139360	1509.11	1.8962e-05	1509.11	0	0.000100422
396_GLDPNKPPEL_2_run0	1/sp|Q9ULL5|PRR12_HUMAN	165232	2722.2	1.90287e-05	2722.2	0	0.000101198
1598_AAAAGRKTL_2_run0	1/sp|Q9BSJ5|CQ080_HUMAN	53013	447.634	1.90498e-05	447.634	0	0.000101463
952_LMYPYIFHV_2_run0	1/sp|Q9NZB2|F120A_HUMAN	30307	5147.73	1.91551e-05	5147.73	0	0.000101778
69_ALLPDLPAL_2_run0	1/sp|Q8NC60|NOA1_HUMAN	17182	5700.87	1.92343e-05	5700.87	0	0.000102016
3981_YPKGAGEML_2_run0	1/sp|Q96DE5|APC16_HUMAN	154173	2259	1.93499e-05	2259	0	0.000102821
3470_SPISSNSHRSL_2_run0	1/sp|Q9NR09|BIRC6_HUMAN	24562	1181.84	1.93971e-05	1181.84	0	0.0001029
3306_RPYTNKVITL_2_run0	1/sp|Q14004|CDK13_HUMAN	49182	2428.9	1.94562e-05	2428.9	0	0.000103575
2705_MIRAAPPPL_2_run0	1/sp|P10619|PPGB_HUMAN	370152	2918.8	1.95171e-05	2918.8	0	0.000104286
1228_SLLQTQHAL_2_run0	1/sp|P53365|ARFP2_HUMAN	110043	2638.6	1.95954e-05	2638.6	0	0.000104457
2280_IPRSILMT_2_run0	1/sp|Q16531|DDB1_HUMAN	86037	2976.01	1.9607e-05	2976.01	0	0.000104551
500_GVLPNIQAV_2_run0	1/sp|Q96QV6|H2A1A_HUMAN	76332	4120.17	1.96967e-05	4120.17	0	0.000104659
996_NLLTHIENV_2_run0	1/sp|A8MW92|P20L1_HUMAN	47334	3598.9	1.9827e-05	3598.9	0	0.000104699
1274_TLADVLYHV_2_run0	1/sp|Q9UBL3|ASH2L_HUMAN	107609	4337.99	1.99239e-05	4337.99	0	0.000106969
2602_LPLAHVLEL_2_run0	1/sp|O95573|ACSL3_HUMAN	31234	4713.36	2.00601e-05	4713.36	0	0.000107185
1354_VLDDKLVFV_2_run0	1/sp|Q4KMQ2|ANO6_HUMAN	55841	4243.41	2.01202e-05	4243.41	0	0.000107693
2730_MPRGPTLGHVSL_2_run0	1/sp|Q96TA2|YMEL1_HUMAN	82925	3161.73	2.02198e-05	3161.73	0	0.000108643
867_LLASEVPQL_2_run0	1/sp|Q6PJG6|BRAT1_HUMAN	139822	4101.79	2.03665e-05	4101.79	0	0.000109471
3716_SPTIGKQL_2_run0	1/sp|P42285|SK2L2_HUMAN	78076	1720.79	2.04026e-05	1720.79	0	0.00011004
375_GIM(UniMod:35)KKAYEL_2_run0	1/sp|P11831|SRF_HUMAN	55990	1651.08	2.04692e-05	1651.08	0	0.000110239
112_ALTEYTLYL_2_run0	1/sp|Q14139|UBE4A_HUMAN	16818	5022.24	2.05248e-05	5022.24	0	0.000111215
3947_VPSEPKLSL_2_run0	1/sp|Q6L8Q7|PDE12_HUMAN	83840	3093.45	2.05482e-05	3093.45	0	0.000111725
2667_LPSDKALVL_2_run0	1/sp|Q03001|DYST_HUMAN	81839	3303.47	2.06293e-05	3303.47	0	0.000111837
1291_TLISELVQA_2_run0	1/sp|Q14999|CUL7_HUMAN	44846	4811.51	2.06931e-05	4811.51	0	0.000111968
3429_SPFPFLTAL_2_run0	1/sp|Q9BWH6|RPAP1_HUMAN	10583	6351.63	2.0728e-05	6351.63	0	0.000112122
3581_SPRELLSNSEQL_2_run0	1/sp|O14879|IFIT3_HUMAN	30937	2954.86	2.07952e-05	2954.86	0	0.000112722
1451_VTSIAKAPAV_2_run0	1/sp|Q9NU22|MDN1_HUMAN	127922	2729.24	2.09748e-05	2729.24	0	0.000112815
3359_SPAIGRTSIL_2_run0	1/sp|Q9C0D2|K1731_HUMAN	89145	2859.62	2.10411e-05	2859.62	0	0.000112908
2439_KPQKGGPL_2_run0	1/sp|Q9UNY4|TTF2_HUMAN	45425	445.865	2.10587e-05	445.865	0	0.000112935
427_GLLDAVTYL_2_run0	1/sp|Q9UP65|PA24C_HUMAN	67500	5540.33	2.10906e-05	5540.33	0	0.000113861
3884_VPDHVVWSLF_2_run0	3/sp|Q01628|IFM3_HUMAN/sp|Q01629|IFM2_HUMAN/sp|P13164|IFM1_HUMAN	41774	5275.26	2.12437e-05	5275.26	0	0.000113874
1245_SLSPIYPAA_2_run0	1/sp|P18858|DNLI1_HUMAN	132469	3274.07	2.13198e-05	3274.07	0	0.000114472
1921_APRSVMKSF_2_run0	1/sp|Q9NQS7|INCE_HUMAN	32741	1637.74	2.14105e-05	1637.74	0	0.000115048
1339_TVWPTMITPML_2_run0	1/sp|P03928|ATP8_HUMAN	17967	6127.28	2.14554e-05	6127.28	0	0.000115185
861_LLAEALNQV_2_run0	1/sp|Q05655|KPCD_HUMAN	68239	3739.54	2.16605e-05	3739.54	0	0.000116059
1618_APAAFGLVSF_2_run0	1/sp|Q9NUM3|S39A9_HUMAN	37338	5319.1	2.17634e-05	5319.1	0	0.000116835
163_FAMPYFIQV_2_run0	1/sp|Q00610|CLH1_HUMAN	8798	5947.1	2.18185e-05	5947.1	0	0.000117262
405_GLHFVVPSV_2_run0	1/sp|Q6P1X5|TAF2_HUMAN	104706	4300.29	2.19242e-05	4300.29	0	0.000117885
3635_SPRPRPGPEL_2_run0	1/sp|Q6P2E9|EDC4_HUMAN	36617	1394.04	2.20508e-05	1394.04	0	0.000118493
3751_SVRKPTAEA_2_run0	1/sp|Q6ZRI6|CO039_HUMAN	41697	483.327	2.21064e-05	483.327	0	0.000119128
2536_KPYNNHSEM(UniMod:35)_2_run0	1/sp|Q8IU60|DCP2_HUMAN	3900	284.783	2.2202e-05	284.783	0	0.000119238
1017_QLLDQVEQI_2_run0	1/sp|Q7Z7H5|TMED4_HUMAN	30108	4002.21	2.2286e-05	4002.21	0	0.000121858
1174_SLAQYLINA_2_run0	2/sp|P57721|PCBP3_HUMAN/sp|Q15365|PCBP1_HUMAN	31917	4569.07	2.2412e-05	4569.07	0	0.000121947
559_ILLDNEFHV_2_run0	1/sp|O43353|RIPK2_HUMAN	37946	4211.08	2.2467e-05	4211.08	0	0.000123054
1073_RLIPIIVLL_2_run0	1/sp|B0I1T2|MYO1G_HUMAN	64036	6178.55	2.25283e-05	6178.55	0	0.000123372
3871_VARVPGSQL_2_run0	1/sp|O75151|PHF2_HUMAN	48217	1861.78	2.25966e-05	1861.78	0	0.000124148
3736_SPWADNTAL_2_run0	1/sp|P57076|CU059_HUMAN	130490	3287.37	2.27073e-05	3287.37	0	0.000125209
460_GLTSAIQAV_2_run0	1/sp|Q9Y692|GMEB1_HUMAN	36648	3393.1	2.27986e-05	3393.1	0	0.000125747
2338_KPASFMTSI_2_run0	1/sp|P53396|ACLY_HUMAN	48998	3122.83	2.29092e-05	3122.83	0	0.000127037
1154_SIIQRLLEV_2_run0	1/sp|P36873|PP1G_HUMAN	109823	5129.77	2.29495e-05	5129.77	0	0.000128941
1403_VLMPWIHEL_2_run0	1/sp|Q9C000|NALP1_HUMAN	45602	5231.43	2.31075e-05	5231.43	0	0.000129125
473_GLWGHALLL_2_run0	1/sp|O15027|SC16A_HUMAN	138149	5041.71	2.31798e-05	5041.71	0	0.000130684
2165_GVRPPAPSL_2_run0	1/sp|Q92673|SORL_HUMAN	1763480	2303.2	2.3226e-05	2303.2	0	0.000131081
3264_RPTGLVVLL_2_run0	1/sp|Q6ZT12|UBR3_HUMAN	64283	4356.08	2.33635e-05	4356.08	0	0.000132256
2960_RPFPFLMGL_2_run0	1/sp|Q13342|SP140_HUMAN	45385	5719.97	2.34337e-05	5719.97	0	0.000132616
341_FLYSGEPTYL_2_run0	1/sp|O75503|CLN5_HUMAN	41993	4452.05	2.35135e-05	4452.05	0	0.000132949
1398_VLMEKPDVVV_2_run0	1/sp|Q9NY93|DDX56_HUMAN	54329	3253.1	2.36108e-05	3253.1	0	0.000133076
1805_APNPYRQAIM_2_run0	1/sp|Q7RTS9|DYM_HUMAN	51647	2397.3	2.37105e-05	2397.3	0	0.000133173
1352_VLAWGLLNV_2_run0	1/sp|Q96SK2|TM209_HUMAN	9937	5988.78	2.37783e-05	5988.78	0	0.000133671
3483_SPKPPSQQL_2_run0	1/sp|Q8IZD2|KMT2E_HUMAN	141724	1430.71	2.38258e-05	1430.71	0	0.000134459
3317_RVMAPRALL_2_run0	2/sp|Q29865|1C18_HUMAN/sp|P10321|1C07_HUMAN	1938450	2479.36	2.38548e-05	2479.36	0	0.000134871
1428_VLWFKPVEL_2_run0	1/sp|Q2NL82|TSR1_HUMAN	42150	5264.14	2.39501e-05	5264.14	0	0.000135659
3552_SPQKTMSVL_2_run0	1/sp|Q12888|TP53B_HUMAN	264053	2079.92	2.40924e-05	2079.92	0	0.000135668
767_KLQQHIFAV_2_run0	1/sp|Q2M1K9|ZN423_HUMAN	35332	2642.46	2.42367e-05	2642.46	0	0.000135678
1964_APSMDRAAVA_2_run0	1/sp|Q9H0P0|5NT3A_HUMAN	52739	1451.66	2.42782e-05	1451.66	0	0.0001357
2259_IPNNVKTAV_2_run0	1/sp|P04350|TBB4A_HUMAN	59710	1757.12	2.4499e-05	1757.12	0	0.000135781
3066_RPLKGRINL_2_run0	1/sp|P00374|DYR_HUMAN	22567	1445.21	2.46049e-05	1445.21	0	0.000136918
2435_KPQDYKKRL_2_run0	1/sp|P35222|CTNB1_HUMAN	10046	591.871	2.46666e-05	591.871	0	0.000137235
3280_RPVSSTGINF_2_run0	1/sp|Q9HCD5|NCOA5_HUMAN	98606	2653.83	2.47373e-05	2653.83	0	0.00013733
403_GLFQGKTPL_2_run0	1/sp|Q9ULW0|TPX2_HUMAN	111094	3273.16	2.48261e-05	3273.16	0	0.000139274
3007_RPINALDEL_2_run0	1/sp|Q8TCU6|PREX1_HUMAN	119360	3291.23	2.49512e-05	3291.23	0	0.000140196
1346_VLADQEVRL_2_run0	1/sp|O43566|RGS14_HUMAN	106775	2852.09	2.49994e-05	2852.09	0	0.000140289
3443_SPGPSRPGL_2_run0	1/sp|Q92888|ARHG1_HUMAN	443361	1459.97	2.51397e-05	1459.97	0	0.000140462
2812_QPHMVLSSF_2_run0	1/sp|P49327|FAS_HUMAN	45821	3388.95	2.52093e-05	3388.95	0	0.000140726
2562_LPAPPHIDV_2_run0	1/sp|Q09161|NCBP1_HUMAN	123658	3481.52	2.52464e-05	3481.52	0	0.000140821
1467_YIDDTLTMV_2_run0	1/sp|Q9H3C7|GGNB2_HUMAN	29321	4121.46	2.52963e-05	4121.46	0	0.000141619
959_MLANDIARL_2_run0	1/sp|Q9H4M9|EHD1_HUMAN	60252	3515.96	2.53974e-05	3515.96	0	0.000141718
3159_RPREKKLGL_2_run0	1/sp|O60762|DPM1_HUMAN	17069	598.671	2.55132e-05	598.671	0	0.000142493
2492_KPRVPPATAF_2_run0	1/sp|Q99707|METH_HUMAN	37549	1876.66	2.5544e-05	1876.66	0	0.000142565
2864_RPAANPIQFTL_2_run0	1/sp|P23921|RIR1_HUMAN	22123	4099.04	2.55931e-05	4099.04	0	0.000142682
3485_SPKPVSSTV_2_run0	1/sp|Q9ULT8|HECD1_HUMAN	115713	977.445	2.56756e-05	977.445	0	0.000143182
3132_RPQSKAPDSTL_2_run0	1/sp|O60291|MGRN1_HUMAN	21141	900.344	2.58206e-05	900.344	0	0.000143301
1662_APAPVQPPM_2_run0	1/sp|O14497|ARI1A_HUMAN	136123	2551.32	2.60179e-05	2551.32	0	0.000143896
3072_RPLNSHATL_2_run0	1/sp|Q9NU22|MDN1_HUMAN	73796	1087.34	2.61784e-05	1087.34	0	0.000144259
467_GLVGALMHV_2_run0	1/sp|P42768|WASP_HUMAN	32899	4187.48	2.64705e-05	4187.48	0	0.000144567
592_ILSKDGVLYV_2_run0	1/sp|Q9H1A4|APC1_HUMAN	92410	3448.59	2.66361e-05	3448.59	0	0.000144852
743_KLMDVGLIAI_2_run0	1/sp|P31948|STIP1_HUMAN	48333	4957.16	2.66925e-05	4957.16	0	0.000144885
3586_SPRFVDVQPSSL_2_run0	1/sp|Q8WYP5|ELYS_HUMAN	167004	3449.38	2.68241e-05	3449.38	0	0.000145171
1527_YLLPKDQGITL_2_run0	1/sp|O95273|CCDB1_HUMAN	25326	4013.1	2.70177e-05	4013.1	0	0.00014536
3783_TPGPAGSRL_2_run0	1/sp|P57086|SCND1_HUMAN	99291	1393.33	2.70639e-05	1393.33	0	0.000145475
328_FLWERPTLLV_2_run0	1/sp|Q6IN84|MRM1_HUMAN	15035	5305.86	2.71438e-05	5305.86	0	0.000145592
2294_IPTSARSML_2_run0	1/sp|Q8WXI9|P66B_HUMAN	682093	2529.93	2.71891e-05	2529.93	0	0.000149538
600_ILVGLLHMV_2_run0	1/sp|Q53FV1|ORML2_HUMAN	25517	5124.09	2.73276e-05	5124.09	0	0.00015002
1458_WLMPVIPAL_2_run0	1/sp|Q96CB5|CH044_HUMAN	54852	6618.6	2.74215e-05	6618.6	0	0.000150479
1045_RLAGADVVLGV_2_run0	1/sp|P27708|PYR1_HUMAN	104649	3578.31	2.74812e-05	3578.31	0	0.000150998
2733_MPRGVVVTL_2_run0	1/sp|Q9ULT8|HECD1_HUMAN	2785420	3414.58	2.75646e-05	3414.58	0	0.000151651
3712_SPTGRYTTL_2_run0	2/sp|Q9NTI2|AT8A2_HUMAN/sp|Q9Y2Q0|AT8A1_HUMAN	46170	1861.61	2.76441e-05	1861.61	0	0.000155546
3577_SPRDPVLTL_2_run0	1/sp|Q86XL3|ANKL2_HUMAN	173077	3157.14	2.7695e-05	3157.14	0	0.000157296
1568_YLTPLILTL_2_run0	1/sp|Q9NX61|T161A_HUMAN	5908	6280.01	2.77766e-05	6280.01	0	0.000157513
964_MLFGHPLLVSV_2_run0	1/sp|P51784|UBP11_HUMAN	16532	5072.64	2.7873e-05	5072.64	0	0.00015887
1900_APRPPVSAA_2_run0	1/sp|Q8TF74|WIPF2_HUMAN	426137	1347.18	2.79963e-05	1347.18	0	0.000159047
3249_RPSQPTDQL_2_run0	1/sp|Q9Y6Q6|TNR11_HUMAN	71350	1399.85	2.80865e-05	1399.85	0	0.000160054
3348_SPAFRILSV_2_run0	1/sp|Q9NXH9|TRM1_HUMAN	31408	4111.35	2.8164e-05	4111.35	0	0.000160395
1792_APLSGSKEM_2_run0	1/sp|O95391|SLU7_HUMAN	74823	1194.68	2.83636e-05	1194.68	0	0.000160735
2881_RPALPALLV_2_run0	1/sp|P05362|ICAM1_HUMAN	67254	4312.4	2.85328e-05	4312.4	0	0.000162572
3901_VPLAQAQAL_2_run0	1/sp|Q96C01|F136A_HUMAN	136985	2962.89	2.86218e-05	2962.89	0	0.000163211
3095_RPNGVSAVAL_2_run0	1/sp|Q9NZ63|CI078_HUMAN	76840	2312.29	2.87528e-05	2312.29	0	0.000163966
2774_NPQERTLTL_2_run0	1/sp|P08238|HS90B_HUMAN	235354	2307.33	2.88038e-05	2307.33	0	0.000164377
3436_SPGIKSSSL_2_run0	1/sp|O14513|NCKP5_HUMAN	71864	1502.61	2.90493e-05	1502.61	0	0.000164414
794_KLWQTPLHV_2_run0	1/sp|Q8NB46|ANR52_HUMAN	54184	3320.05	2.90941e-05	3320.05	0	0.000164664
2689_LPTLKAAVI_2_run0	1/sp|Q3ZCQ3|F174B_HUMAN	49296	3644.55	2.92822e-05	3644.55	0	0.000165551
888_LLHELLTHV_2_run0	1/sp|Q6TFL4|KLH24_HUMAN	52733	3452.27	2.93705e-05	3452.27	0	0.000165633
1312_TLSDIMVSL_2_run0	1/sp|Q9NXF1|TEX10_HUMAN	47609	5048.12	2.94484e-05	5048.12	0	0.000166703
75_ALLSRLEQI_2_run0	1/sp|Q9UKM9|RALY_HUMAN	71718	4005.06	2.96053e-05	4005.06	0	0.000166879
1634_APAKPPRHL_2_run0	1/sp|Q5JSH3|WDR44_HUMAN	39999	672.219	2.97339e-05	672.219	0	0.000167289
1396_VLMDRLPSLL_2_run0	1/sp|O60287|NPA1P_HUMAN	29498	4977.3	2.98744e-05	4977.3	0	0.000168477
465_GLVDEKALAQA_2_run0	2/sp|P56545|CTBP2_HUMAN/sp|Q13363|CTBP1_HUMAN	73402	2757.96	2.99976e-05	2757.96	0	0.000168683
923_LLPISPFML_2_run0	1/sp|P03891|NU2M_HUMAN	42592	6383.54	3.00612e-05	6383.54	0	0.000169297
3835_TPRRPFEKSRL_2_run0	1/sp|P46781|RS9_HUMAN	41769	1046.54	3.01333e-05	1046.54	0	0.000169539
402_GLFDTAISL_2_run0	1/sp|Q12769|NU160_HUMAN	37014	5552.37	3.0268e-05	5552.37	0	0.000169697
1909_APRRYSSSL_2_run0	1/sp|Q68EM7|RHG17_HUMAN	55196	939.651	3.04245e-05	939.651	0	0.000172156
2223_IPAIRDITL_2_run0	1/sp|Q9Y4D8|HECD4_HUMAN	97418	4101.6	3.04581e-05	4101.6	0	0.000173524
3558_SPQNSTDSV_2_run0	1/sp|Q14694|UBP10_HUMAN	26638	806.314	3.05424e-05	806.314	0	0.000175431
491_GMLDGLVNV_2_run0	1/sp|Q8IXB1|DJC10_HUMAN	20309	4854.02	3.05806e-05	4854.02	0	0.000176705
133_ALYHLAIKL_2_run0	1/sp|Q9UKA4|AKA11_HUMAN	44077	3960.41	3.07503e-05	3960.41	0	0.000177895
50_ALIEGVGILL_2_run0	1/sp|O60830|TI17B_HUMAN	15128	5818.3	3.08307e-05	5818.3	0	0.000178031
1002_NMLEAVHTI_2_run0	1/sp|P33981|TTK_HUMAN	158471	3424.28	3.08999e-05	3424.28	0	0.000179524
3108_RPPNYSGTIAL_2_run0	1/sp|Q13454|TUSC3_HUMAN	70745	3012.73	3.10545e-05	3012.73	0	0.000179904
2519_KPTSERKVSL_2_run0	1/sp|O14777|NDC80_HUMAN	25947	796.701	3.11867e-05	796.701	0	0.000180433
895_LLLAAPAQA_2_run0	1/sp|P17900|SAP3_HUMAN	46651	3300.63	3.12576e-05	3300.63	0	0.00018134
1151_SIAAVLPKV_2_run0	1/sp|Q96SA4|SERC2_HUMAN	41263	3652.36	3.14513e-05	3652.36	0	0.000182016
2072_FPQATRQSL_2_run0	1/sp|Q9ULV3|CIZ1_HUMAN	69038	2117.1	3.15401e-05	2117.1	0	0.000182606
1444_VMITKLVEV_2_run0	1/sp|Q92729|PTPRU_HUMAN	47706	3944.11	3.17661e-05	3944.11	0	0.000183177
2132_GPNGERSAEL_2_run0	1/sp|Q7LBC6|KDM3B_HUMAN	25180	1078.11	3.18989e-05	1078.11	0	0.000183883
359_FVFPGELL_2_run0	1/sp|Q15758|AAAT_HUMAN	210525	5774.45	3.19823e-05	5774.45	0	0.000183976
1377_VLISKLPYI_2_run0	1/sp|Q8IWF6|DEN6A_HUMAN	29544	4566.96	3.20057e-05	4566.96	0	0.000185513
1548_YLQEIQTQL_2_run0	1/sp|Q9BQF6|SENP7_HUMAN	36923	3652.59	3.22904e-05	3652.59	0	0.000186411
[truncated: 2,539 more rows]

## Sheet: PBMC
Figure 3-source data 1. OpenSWATH analysis of PBMCs (SWATH windows of 25 Da width each size)
Peptide	Protein	Intensity_carone_J130709_002_SW_with_dscore.csv_0_0	RT_carone_J130709_002_SW_with_dscore.csv_0_0	score_carone_J130709_002_SW_with_dscore.csv_0_0	RT_mean	RT_std	pg_pvalue
216_KTYGEIFEK_2_run0	1/sp|O95298|NDUC2_HUMAN	11287	2663.63	4.1674e-07	2663.63	0	1.59896e-07
751_SVIDSAELQAY_2_run0	1/sp|P78527|PRKDC_HUMAN	22392	4056.81	4.1674e-07	4056.81	0	2.13757e-07
301_RSDTPLIYK_2_run0	1/sp|P41252|SYIC_HUMAN	18550	2390.97	4.1674e-07	2390.97	0	1.94953e-07
598_EVAGHLRTY_2_run0	1/sp|Q8TEM1|PO210_HUMAN	37809	2004.42	4.1674e-07	2004.42	0	1.41436e-07
903_LPSPLKQTI_2_run0	1/sp|P01871|IGHM_HUMAN	63944	3597.92	4.1674e-07	3597.92	0	1.63664e-07
1472_YILAGVENSK_2_run0	1/iRT|iRT_Biognosys|iRT_Biognosys	300469	3000.48	4.1674e-07	3000.48	0	2.32973e-07
769_YTAQPTQGY_2_run0	1/sp|Q01844|EWS_HUMAN	104100	2258.61	4.1674e-07	2258.61	0	2.16705e-07
1273_TSSKPDPSQW_2_run0	1/sp|O75410|TACC1_HUMAN	15265	2439.65	4.1674e-07	2439.65	0	6.38052e-08
15_ALFLTLTTK_2_run0	1/sp|P00403|COX2_HUMAN	45510	4550.8	4.1674e-07	4550.8	0	6.14504e-08
536_EIRDIILGM_2_run0	1/sp|Q6P2Q9|PRP8_HUMAN	37302	4893.56	4.1674e-07	4893.56	0	1.05539e-07
363_SVAQLLLSK_2_run0	1/sp|P29375|KDM5A_HUMAN	22981	4059.06	4.1674e-07	4059.06	0	1.73956e-07
696_EVVERVLTF_2_run0	1/sp|Q8NEZ5|FBX22_HUMAN	162430	4334.2	4.1674e-07	4334.2	0	2.22491e-07
692_EVVEEVEKY_2_run0	1/sp|Q69YN2|C19L1_HUMAN	23774	2901.44	4.1674e-07	2901.44	0	1.23276e-07
658_EVMEIMSRF_2_run0	1/sp|Q9Y253|POLH_HUMAN	63182	4723.37	4.1674e-07	4723.37	0	2.17178e-07
596_EVAEFLARH_2_run0	1/sp|Q9NRW3|ABC3C_HUMAN	36173	2935.38	4.1674e-07	2935.38	0	1.88971e-07
458_DVAALLIKY_2_run0	1/sp|Q9H2K2|TNKS2_HUMAN	61921	4949.8	4.1674e-07	4949.8	0	2.17893e-07
479_DVIQAGKEY_2_run0	1/sp|O75937|DNJC8_HUMAN	38828	2490.48	4.1674e-07	2490.48	0	1.12274e-07
305_RSYSDPPLK_2_run0	1/sp|P52597|HNRPF_HUMAN	297187	1880.37	4.1674e-07	1880.37	0	1.21292e-07
459_DVAEEIANY_2_run0	1/sp|Q01082|SPTB2_HUMAN	35326	3840.93	4.1674e-07	3840.93	0	1.00904e-07
1260_TAAQITQRKW_2_run0	43/sp|Q29865|1C18_HUMAN/sp|Q29960|1C16_HUMAN/sp|Q07000|1C15_HUMAN/sp|P30510|1C14_HUMAN/sp|P30505|1C08_HUMAN/sp|P30508|1C12_HUMAN/sp|Q29963|1C06_HUMAN/sp|P30504|1C04_HUMAN/sp|P04222|1C03_HUMAN/sp|P30501|1C02_HUMAN/sp|P30499|1C01_HUMAN/sp|Q29718|1B82_HUMAN/sp|P30498|1B78_HUMAN/sp|Q31612|1B73_HUMAN/sp|Q29940|1B59_HUMAN/sp|Q29836|1B67_HUMAN/sp|P10319|1B58_HUMAN/sp|P18465|1B57_HUMAN/sp|P30495|1B56_HUM…	19165	2447.36	4.1674e-07	2447.36	0	9.87436e-08
776_YVYEYPSRY_2_run0	1/sp|Q14511|CASL_HUMAN	25454	3216.74	4.1674e-07	3216.74	0	4.39535e-08
395_VTYVPVTTFK_2_run0	1/sp|P62899|RL31_HUMAN	60234	3760.51	4.1674e-07	3760.51	0	1.36378e-07
1034_GSEDGTLRLW_2_run0	1/sp|Q9Y3F4|STRAP_HUMAN	14429	4325.55	4.1674e-07	4325.55	0	1.70092e-07
481_DVISSIRNF_2_run0	1/sp|Q8N4H5|TOM5_HUMAN	82377	4473.18	4.1674e-07	4473.18	0	1.53992e-07
1050_GTYGVRAAW_2_run0	1/sp|P13598|ICAM2_HUMAN	149070	3310.44	4.1674e-07	3310.44	0	8.34224e-08
253_MIYDSLDYAKK_3_run0	1/sp|P62847|RS24_HUMAN	26521	3190.03	4.1674e-07	3190.03	0	1.02691e-07
1063_IAKIPNFW_2_run0	1/sp|Q01105|SET_HUMAN	32132	4965.64	4.1674e-07	4965.64	0	2.36556e-07
699_EVVHLILFY_2_run0	1/sp|Q96T76|MMS19_HUMAN	10244	5861.14	4.1674e-07	5861.14	0	1.88095e-07
1258_SVTEIQEKW_2_run0	1/sp|Q9NR30|DDX21_HUMAN	48832	3369.3	4.1674e-07	3369.3	0	2.38849e-08
813_DAYTVLTRI_2_run0	1/sp|Q9Y230|RUVB2_HUMAN	37576	4458.98	4.1674e-07	4458.98	0	5.42764e-08
650_EVISQHLVSY_2_run0	1/sp|P12270|TPR_HUMAN	29083	3547.46	4.1674e-07	3547.46	0	2.61467e-07
567_ETFKLAQTY_2_run0	1/sp|Q92624|APBP2_HUMAN	8995	3474.55	4.1674e-07	3474.55	0	1.20235e-08
715_FVISNTTGY_2_run0	1/sp|P49354|FNTA_HUMAN	19332	3730.28	4.1674e-07	3730.28	0	8.55065e-08
820_DPFIIIHSI_2_run0	1/sp|Q96RS6|NUDC1_HUMAN	29315	5430.27	4.1674e-07	5430.27	0	2.75464e-07
509_EAFDELLASKY_2_run0	1/sp|P41220|RGS2_HUMAN	12804	4665.5	4.1674e-07	4665.5	0	2.50922e-07
534_EIKEVILEF_2_run0	1/sp|Q709C8|VP13C_HUMAN	35519	5103.97	4.1674e-07	5103.97	0	1.57938e-07
553_ESSSVVLRY_2_run0	1/sp|Q5JUQ0|FA78A_HUMAN	58961	3113.66	4.1674e-07	3113.66	0	7.52726e-08
392_VM(UniMod:35)APRTLLL_2_run0	1/sp|P13746|1A11_HUMAN	186989	4167.96	4.1674e-07	4167.96	0	1.39565e-07
511_EAIEQILKY_2_run0	1/sp|Q6PI26|SHQ1_HUMAN	44066	4364.57	4.1674e-07	4364.57	0	5.59858e-08
1205_RIVEPYVTW_2_run0	1/sp|Q6DKI1|RL7L_HUMAN	17969	4397.5	4.1674e-07	4397.5	0	2.71314e-07
1042_GTLSGHASW_2_run0	1/sp|Q9GZS3|WDR61_HUMAN	31771	2663.56	4.1674e-07	2663.56	0	1.19196e-07
327_RVQEAVESMVK_3_run0	1/sp|Q96C01|F136A_HUMAN	56571	2654.43	4.1674e-07	2654.43	0	1.0094e-07
808_DAYPNGLQV_2_run0	1/sp|P42892|ECE1_HUMAN	22391	3614.56	4.1674e-07	3614.56	0	2.28438e-07
812_DAYTKKELI_2_run0	1/sp|Q9Y490|TLN1_HUMAN	13660	2558.02	4.1674e-07	2558.02	0	2.11852e-07
389_VLYDRVLKY_2_run0	1/sp|Q9UHB9|SRP68_HUMAN	19475	3522.11	4.1674e-07	3522.11	0	3.33118e-08
369_SVNSTVLVK_2_run0	1/sp|Q86YT9|JAML1_HUMAN	40494	2365.12	4.1674e-07	2365.12	0	8.26116e-08
577_ETIVLKEGSEY_2_run0	1/sp|P52566|GDIR2_HUMAN	82301	3185.97	4.1674e-07	3185.97	0	2.11554e-07
1197_RAIQINPAF_2_run0	1/sp|O15294|OGT1_HUMAN	41080	3758.99	4.1674e-07	3758.99	0	2.5125e-07
541_EIVPFRVAAY_2_run0	1/sp|O43252|PAPS1_HUMAN	38421	4594.45	4.1674e-07	4594.45	0	1.82067e-07
784_DALDVANKI_2_run0	1/sp|P62750|RL23A_HUMAN	64142	3482.24	4.1674e-07	3482.24	0	5.01611e-08
88_GLTDVILYH_2_run0	1/sp|O60506|HNRPQ_HUMAN	60439	4329.02	4.1674e-07	4329.02	0	1.84369e-07
497_DVVIVSSKY_2_run0	1/sp|Q13438|OS9_HUMAN	31336	3154.9	4.1674e-07	3154.9	0	1.87612e-07
756_SVVELINHY_2_run0	1/sp|Q92569|P55G_HUMAN	63435	4057.53	4.1674e-07	4057.53	0	8.37287e-08
133_IIAIPTGVK_2_run0	1/sp|P00395|COX1_HUMAN	100566	3584.76	4.1674e-07	3584.76	0	1.46174e-07
1084_KAINPINTF_2_run0	1/sp|Q07960|RHG01_HUMAN	28922	3607.36	4.1674e-07	3607.36	0	1.16256e-07
383_VLAPEGSVPNK_2_run0	1/sp|Q9UN86|G3BP2_HUMAN	43837	2313.94	4.17485e-07	2313.94	0	2.7866e-07
1181_KVTELLRTF_2_run0	1/sp|Q15833|STXB2_HUMAN	47041	3777.6	4.17601e-07	3777.6	0	2.83767e-07
480_DVIRLIM(UniMod:35)QY_2_run0	1/sp|Q2TAY7|SMU1_HUMAN	121906	4775.87	4.20306e-07	4775.87	0	2.88285e-07
1011_ASGRFGQDF_2_run0	1/sp|Q9Y490|TLN1_HUMAN	31260	2794.71	4.24762e-07	2794.71	0	2.88628e-07
428_DIRAFDSRF_2_run0	1/sp|Q8IZH2|XRN1_HUMAN	83119	3714.62	4.26608e-07	3714.62	0	3.04936e-07
610_EVFDKDLSKL_2_run0	1/sp|Q9Y4D1|DAAM1_HUMAN	25164	3639.01	4.26608e-07	3639.01	0	2.90169e-07
800_DAPISPASI_2_run0	1/sp|Q04727|TLE4_HUMAN	50494	3612.42	4.26608e-07	3612.42	0	2.98682e-07
1216_RSMEDFVTW_2_run0	1/sp|Q9NV31|IMP3_HUMAN	18641	4696.71	4.26608e-07	4696.71	0	3.01125e-07
833_DPYRVLGV_2_run0	1/sp|Q9Y2G8|DJC16_HUMAN	24327	3854.99	4.36286e-07	3854.99	0	3.07686e-07
568_ETFNTPAM(UniMod:35)Y_2_run0	1/sp|Q9BYX7|ACTBM_HUMAN	317144	3141.7	4.3647e-07	3141.7	0	3.31415e-07
1065_IGLPGAGKTTW_2_run0	1/sp|Q00839|HNRPU_HUMAN	72615	4026.36	4.3647e-07	4026.36	0	3.11153e-07
673_EVSSISSKF_2_run0	1/sp|Q9Y5K6|CD2AP_HUMAN	90715	2908.17	4.3647e-07	2908.17	0	3.15624e-07
444_DSYSSSRSDLY_2_run0	2/sp|Q96E39|RMXL1_HUMAN/sp|P38159|RBMX_HUMAN	10460	2498.14	4.3647e-07	2498.14	0	3.15886e-07
340_SIFAGQNDPLK_2_run0	1/sp|P27816|MAP4_HUMAN	11986	3534.9	4.3647e-07	3534.9	0	3.20689e-07
639_EVIKNFIQY_2_run0	1/sp|Q9Y262|EIF3L_HUMAN	50518	4128.77	4.3647e-07	4128.77	0	3.11312e-07
592_EVAATEIKM(UniMod:35)_2_run0	1/sp|P52272|HNRPM_HUMAN	94428	1975.49	4.39835e-07	1975.49	0	3.35132e-07
540_EIVKEVSTY_2_run0	1/sp|P68104|EF1A1_HUMAN	69332	2753.73	4.41156e-07	2753.73	0	3.37012e-07
989_YPDRVPVI_2_run0	1/sp|O95166|GBRAP_HUMAN	108570	3751.12	4.41156e-07	3751.12	0	3.39711e-07
762_TVIDEVRTGTY_2_run0	3/sp|Q9BQE3|TBA1C_HUMAN/sp|P68363|TBA1B_HUMAN/sp|Q71U36|TBA1A_HUMAN	18430	3411.41	4.41156e-07	3411.41	0	3.38961e-07
1300_VTALAARTW_2_run0	1/sp|Q9UII2|ATIF1_HUMAN	16560	3341.12	4.41847e-07	3341.12	0	3.4672e-07
806_DAYDGKDYI_2_run0	1/sp|P18462|1A25_HUMAN	40019	2927.58	4.41847e-07	2927.58	0	3.55878e-07
438_DLSPITVKY_2_run0	1/sp|Q969X5|ERGI1_HUMAN	25928	3920.59	4.42205e-07	3920.59	0	3.57855e-07
174_KLFDFVNAKK_3_run0	1/sp|Q08945|SSRP1_HUMAN	25837	3326.38	4.47544e-07	3326.38	0	3.6282e-07
500_DVVRVVGAY_2_run0	1/sp|Q8N2G8|GHDC_HUMAN	58380	3311.99	4.49293e-07	3311.99	0	3.72135e-07
618_EVFSFKMVSY_2_run0	1/sp|Q96RL7|VP13A_HUMAN	7882	4987.03	4.50434e-07	4987.03	0	3.79139e-07
966_VPLGVISRI_2_run0	1/sp|Q13496|MTM1_HUMAN	89660	4372.71	4.52719e-07	4372.71	0	3.88315e-07
560_ETAPLTKNYY_2_run0	1/sp|Q15052|ARHG6_HUMAN	56424	2841.25	4.54266e-07	2841.25	0	3.99765e-07
634_EVIESTNLKY_2_run0	1/sp|Q9Y4A5|TRRAP_HUMAN	36777	3210.36	4.54266e-07	3210.36	0	4.01491e-07
795_DALVTKNLV_2_run0	1/sp|P22087|FBRL_HUMAN	50277	3458.38	4.57657e-07	3458.38	0	4.05264e-07
628_EVIDFSHGL_2_run0	3/sp|Q6PCB6|AB17C_HUMAN/sp|Q5VST6|AB17B_HUMAN/sp|Q96GS6|AB17A_HUMAN	76305	4279.89	4.5883e-07	4279.89	0	4.0637e-07
637_EVIGLLGGRY_2_run0	1/sp|Q5VVJ2|MYSM1_HUMAN	174427	4397.91	4.59779e-07	4397.91	0	4.07054e-07
99_GTFGGLGSK_2_run0	1/sp|Q09666|AHNK_HUMAN	50767	2324.6	4.61951e-07	2324.6	0	4.10791e-07
943_TAADTAAQI_2_run0	1/sp|P01889|1B07_HUMAN	45039	2267.57	4.69858e-07	2267.57	0	4.23646e-07
894_LPNAVITRI_2_run0	1/sp|Q9NRF9|DPOE3_HUMAN	310448	3932.81	4.69858e-07	3932.81	0	4.14562e-07
469_DVFQQQTGGVY_2_run0	1/sp|P61956|SUMO2_HUMAN	24481	3620.36	4.72528e-07	3620.36	0	4.23895e-07
652_EVISVLQKY_2_run0	1/sp|P54132|BLM_HUMAN	57014	3953.02	4.76497e-07	3953.02	0	4.28759e-07
472_DVIAQGIGKL_2_run0	1/sp|P05387|RLA2_HUMAN	14862	4035.18	4.8398e-07	4035.18	0	4.31345e-07
689_EVVDKINQV_2_run0	1/sp|Q8WXH0|SYNE2_HUMAN	223950	2632.63	4.8398e-07	2632.63	0	4.49871e-07
564_ETFGGFDSHQM_2_run0	1/sp|Q12802|AKP13_HUMAN	6705	3502.9	4.8398e-07	3502.9	0	4.51133e-07
965_VPLDPMEHV_2_run0	1/sp|Q14671|PUM1_HUMAN	108498	3714.9	4.8398e-07	3714.9	0	4.35684e-07
668_EVRGSNGAFY_2_run0	1/sp|Q06787|FMR1_HUMAN	16361	2451.8	4.8398e-07	2451.8	0	4.46377e-07
562_ETFDAGLQAF_2_run0	1/sp|Q13813|SPTN1_HUMAN	11623	4769.07	4.84404e-07	4769.07	0	4.59058e-07
558_ETAIYKGDY_2_run0	1/sp|Q15034|HERC3_HUMAN	32782	2609.61	4.84986e-07	2609.61	0	4.69393e-07
752_SVIEAVAHF_2_run0	1/sp|Q8IWV8|UBR2_HUMAN	104690	4302.76	4.87599e-07	4302.76	0	4.87924e-07
1069_ISTPVIRTF_2_run0	1/sp|Q9NZB2|F120A_HUMAN	105323	3995.59	4.88521e-07	3995.59	0	4.90838e-07
64_AVIGADSVTLK_2_run0	1/sp|Q9NYH9|UTP6_HUMAN	32927	3235.09	4.88622e-07	3235.09	0	4.92544e-07
999_AAAKIQASF_2_run0	1/sp|Q92686|NEUG_HUMAN	33493	2810.93	4.90458e-07	2810.93	0	5.21298e-07
840_FPAAIEHTI_2_run0	1/sp|A0AVT1|UBA6_HUMAN	14184	3768.97	4.90458e-07	3768.97	0	4.93289e-07
82_GIYPPGSPGK_2_run0	1/sp|O95295|SNAPN_HUMAN	30532	2347.15	4.90458e-07	2347.15	0	5.16081e-07
1088_KALDVMVSTF_2_run0	1/sp|P26447|S10A4_HUMAN	12278	4405.94	4.90458e-07	4405.94	0	5.22468e-07
587_ETVGTGIMGR_2_run0	1/sp|P32019|I5P2_HUMAN	54883	2617.95	4.90458e-07	2617.95	0	5.28143e-07
611_EVFETIIHSY_2_run0	1/sp|Q86YV0|RASL3_HUMAN	125440	4650.58	4.91918e-07	4650.58	0	5.31584e-07
484_DVMDSTTTQKY_2_run0	1/sp|Q6P2Q9|PRP8_HUMAN	17600	2472.12	4.93041e-07	2472.12	0	5.43808e-07
372_SVYVYKVLK_2_run0	1/sp|P62807|H2B1C_HUMAN	33032	3118.64	4.95023e-07	3118.64	0	5.55974e-07
759_TLIDIMTRF_2_run0	1/sp|P19367|HXK1_HUMAN	48800	5802.08	5.03945e-07	5802.08	0	5.58546e-07
336_RVYSPPEWISR_3_run0	1/sp|Q9P1W9|PIM2_HUMAN	75245	3528.07	5.04412e-07	3528.07	0	5.59313e-07
1133_KSVTLGYLF_2_run0	1/sp|P55265|DSRAD_HUMAN	55715	4988.09	5.08902e-07	4988.09	0	5.74127e-07
140_IQNDRQLQY_2_run0	1/sp|Q9UBB9|TFP11_HUMAN	14694	2378.04	5.09382e-07	2378.04	0	5.76738e-07
1116_KSFETDTNLNF_2_run0	1/sp|P01848|TCA_HUMAN	7683	3827.7	5.13746e-07	3827.7	0	5.79381e-07
[truncated: 1,229 more rows]

## Sheet: Jurkat
Figure 3-source data 1. OpenSWATH analysis of Jurkat cells (SWATH windows of 25 Da width each size)
[truncated: 651 more rows]

[truncated: 7 more sheets: C1R_B27, C1R_B40, SpecLib_JY, SpecLib_PBMC, SpecLibJurkat, SpecLibC1RB27, SpecLibC1RB40]
